# Supplementary material for: Effects of Low Nighttime Temperature on Fatty Acid Content in Developing Seeds from Brassica napus L. Based on RNA-Seq and Metabolome
Source: MDPI journal article supplement (doi:10.3390/plants12020325), 2023-01-10
Supplement: s1 [file s1]

# RNA-seq data

|              | STSL          |               |               | WTSL          |               |               |
|--------------|---------------|---------------|---------------|---------------|---------------|---------------|
| LOC106436817 | 0.72          | 2.20          | 1.97          | 0.18          | 0.43          | 1.67          |
| LOC106436165 | 1.53          | 1.78          | 2.73          | 0.56          | 0.87          | 0.61          |
| LOC106390324 | -1.79         | 0.04          | -1.60         | 0.09          | -0.62         | -0.73         |
| LOC106356333 | 1.86          | 3.50          | 3.10          | 2.25          | 0.78          | 1.62          |
| LOC106383445 | 1.65          | 1.85          | 1.34          | 0.58          | 0.82          | 1.69          |
| LOC106372205 | 1.07          | 0.54          | 1.33          | -0.16         | 0.18          | 0.72          |
| LOC106434448 | 1.73          | 1.59          | 1.38          | 0.53          | 0.18          | 0.77          |
| LOC106439274 | 1.16          | 0.37          | 1.64          | 0.10          | 0.81          | 0.82          |
| LOC106439448 | 1.08          | 0.83          | 1.27          | 0.02          | 0.04          | 0.89          |
| LOC106446788 | 1.92          | 1.35          | 1.03          | 0.74          | 0.29          | 0.44          |
| LOC106396280 | 0.80          | 0.35          | 1.59          | 0.08          | 0.23          | 0.73          |
| LOC106387251 | 1.03          | 1.55          | 2.02          | 0.75          | 0.45          | 0.02          |
|              | OSE18vs.OSE13 | OFE18vs.OFE13 | OTE18vs.OTE13 | SSE18vs.SSE13 | SFE18vs.SFE13 | STE18vs.STE13 |

# qRT-PCR data

|              | STSL          |               |               | WTSL          |               |               |
|--------------|---------------|---------------|---------------|---------------|---------------|---------------|
| LOC106436817 | 2.64          | 1.68          | 1.61          | -0.56         | 0.86          | 1.42          |
| LOC106436165 | 1.07          | 4.35          | 2.27          | 1.16          | 1.19          | 0.18          |
| LOC106390324 | 1.03          | 1.12          | 1.52          | -1.19         | 1.23          | 0.36          |
| LOC106356333 | 7.03          | 1.07          | 2.78          | -1.78         | 1.00          | 4.16          |
| LOC106383445 | 0.15          | 0.59          | 1.00          | -0.53         | 8.41          | 0.20          |
| LOC106372205 | 7.02          | 2.00          | 3.75          | -1.78         | 1.12          | 1.11          |
| LOC106434448 | 1.48          | 8.09          | 1.01          | -0.23         | 0.13          | 1.12          |
| LOC106439274 | 1.32          | 0.33          | 0.73          | -0.82         | 1.39          | 2.55          |
| LOC106439448 | 1.47          | 5.92          | 0.89          | 0.30          | 0.10          | 0.51          |
| LOC106446788 | 7.72          | 1.31          | 6.58          | 0.72          | 1.04          | 0.59          |
| LOC106396280 | 1.73          | 1.02          | 0.80          | -0.27         | 1.13          | 2.25          |
| LOC106387251 | 4.44          | 13.68         | 1.85          | 0.27          | 1.36          | 1.28          |
|              | OSE18vs.OSE13 | OFE18vs.OFE13 | OTE18vs.OTE13 | SSE18vs.SSE13 | SFE18vs.SFE13 | STE18vs.STE13 |

Figure S9. Comparison between qRT-PCR and RNA-seq results for DEGs caused by LNT and HNT.
