# Supplementary material for: Effects of Low Nighttime Temperature on Fatty Acid Content in Developing Seeds from Brassica napus L. Based on RNA-Seq and Metabolome
Source: MDPI journal article supplement (doi:10.3390/plants12020325), 2023-01-10
Supplement: s1 [file s1]

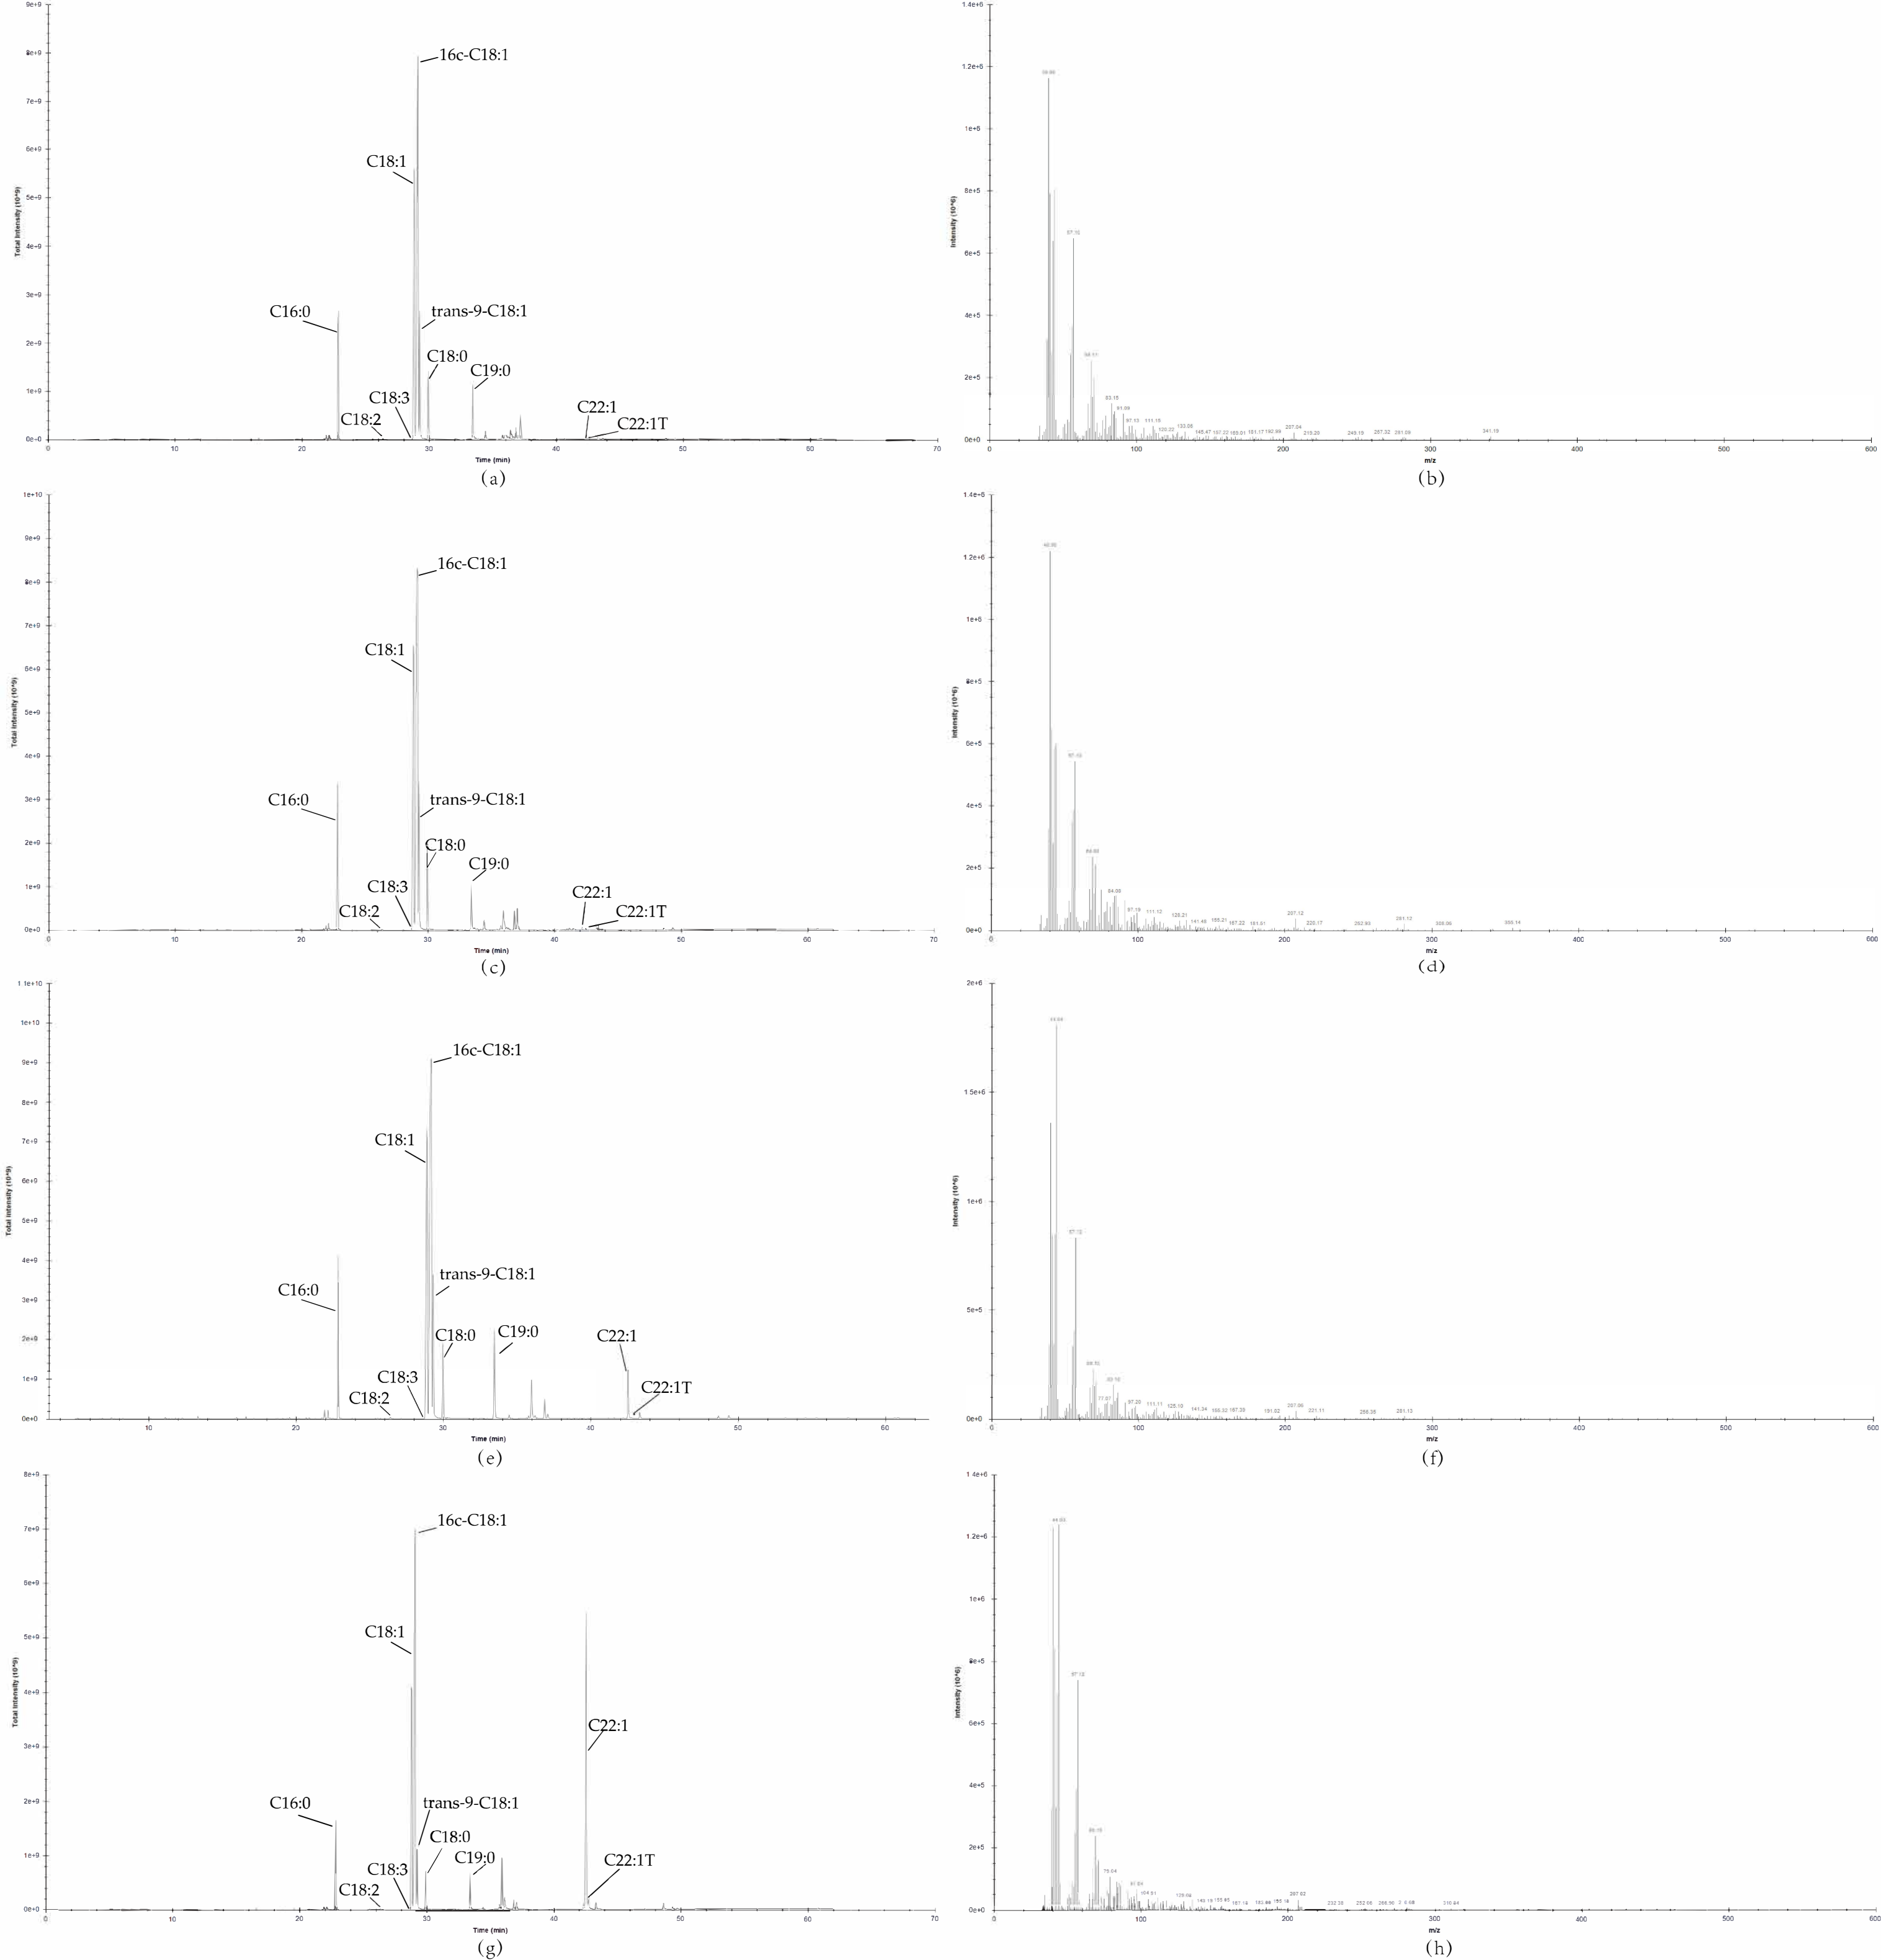

Figure S2. (a, c) and (e, g) Relative retention time of 35 and 43DAF medium- and long-chain fatty acid metabolites of WTSL and STSL in LNT. (b, d) and (f, h) Intensity of 35 and 43 DAF medium- and long-chain fatty acid meta-bolites of WTSL of STSL in LNT.
