# Supplementary material for: Effects of Low Nighttime Temperature on Fatty Acid Content in Developing Seeds from Brassica napus L. Based on RNA-Seq and Metabolome
Source: MDPI journal article supplement (doi:10.3390/plants12020325), 2023-01-10
Supplement: s1 [file s1]

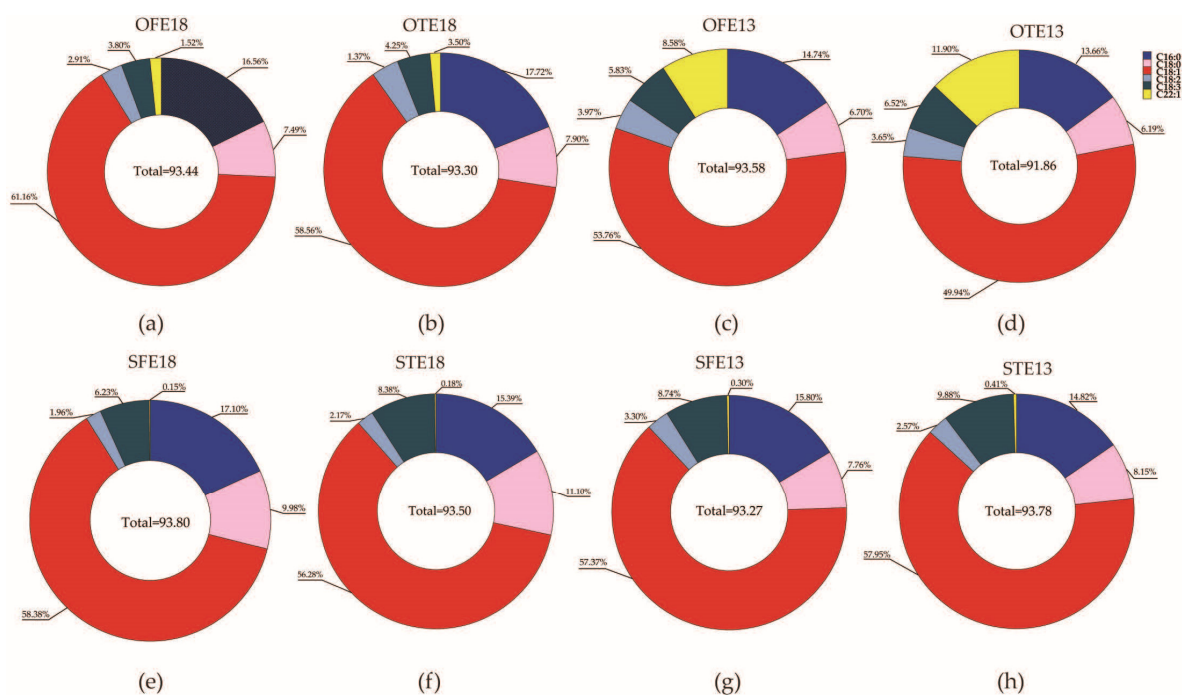

Figure S3. Analyses of major fatty acid contents based on medium- and long-chain fatty acid metabolites
