# Supplementary material for: Effects of Low Nighttime Temperature on Fatty Acid Content in Developing Seeds from Brassica napus L. Based on RNA-Seq and Metabolome
Source: Plants (Basel). 2023 Jan 10;12(2):325. doi: 10.3390/plants12020325 (PMC9862530; doi:10.3390/plants12020325)
Supplement: Supplementary file 1 [file plants-12-00325-s001.zip]

Archive with 30 entries (30 files):
- Figure S1.pdf
- Figure S2.pdf
- Figure S3.pdf
- Figure S4.pdf
- Figure S5.pdf
- Figure S6.pdf
- Figure S7.pdf
- Figure S8.pdf
- Figure S9.pdf
- File S1.html
- File S2.html
- File S3.html
- File S4.html
- Table S1.xlsx
- Table S10.xls
- Table S11.xls
- Table S12.xls
- Table S13.xls
- Table S14.xls
- Table S15.xls
- Table S16.xlsx
- Table S17.xlsx
- Table S2.xlsx
- Table S3.xlsx
- Table S4.xls
- Table S5.xls
- Table S6.xls
- Table S7.xls
- Table S8.xls
- Table S9.xls
