# Supplementary material for: Effects of Low Nighttime Temperature on Fatty Acid Content in Developing Seeds from Brassica napus L. Based on RNA-Seq and Metabolome
Source: Plants (Basel). 2023 Jan 10;12(2):325. doi: 10.3390/plants12020325 (PMC9862530; doi:10.3390/plants12020325)
Supplement: Supplementary file 1 [file plants-12-00325-s001.zip › Table S1.xlsx]

## Sheet: S1
Table S1 Major climate and environmental factors during growth period
Attitude/ m	Latitude/°	Average daytime temperature/℃	Average nighttime temperature/℃	Extreme high-temperature/℃	Extreme low-temperature/℃	Precipitaion/mm	Sunshine duration/h	Evaporat/mm
1600	23.42	26	15	31	9	147	856	606
1800	23.52	24	13	29	8	147	856	598
2000	23.53	21	12	27	8	147	856	581
2200	23.49	20	12	26	5	147	856	575
2400	23.51	18	10	23	2	147	856	572
