# Supplementary material for: Effects of Low Nighttime Temperature on Fatty Acid Content in Developing Seeds from Brassica napus L. Based on RNA-Seq and Metabolome
Source: Plants (Basel). 2023 Jan 10;12(2):325. doi: 10.3390/plants12020325 (PMC9862530; doi:10.3390/plants12020325)
Supplement: Supplementary file 1 [file plants-12-00325-s001.zip › Table S2.xlsx]

## Sheet: Sheet1
Table S2 Effect of different altitudes on oil content and fatty acids composition in Brassica napus L.
	Altitude/m	Palmitic acid/%	Stearic acid/%	Oleic acid/%	Linoleic acid/%	Linolenic acid/%	Arachidic acid/%	Erucic acid %
WTSL	1600	3.84±0.28b	0.91±0.15b	66.19±2.62a	14.97±1.18c	7.36±1.35b	3.80±0.95a	2.21±0.23d
	1800	3.69±0.08b	1.36±0.20a	63.70±3.28ab	17.51±1.54b	7.60±0.18ab	3.50±0.45a	2.73±0.37c
	2000	3.93±0.23b	0.90±0.02b	62.89±1.68ab	16.59±1.34b	7.74±0.48ab	1.92±0.82a	3.61±1.68b
	2200	4.44±0.28a	0.90±0.16b	60.71±1.66b	21.42±1.19a	8.72±0.52ab	2.78±0.54a	4.71±0.32a
	2400	3.86±0.21b	1.03±0.16b	62.92±2.49ab	17.17±1.53b	8.83±0.41a	2.91±0.34a	3.74±0.04b
	Mean	3.95	1.02	63.28	17.53	8.05	2.98	3.4
	SD	0.27	0.2	1.97	2.38	0.68	0.73	0.97
	CV/%	7.25	19.4	3.11	13.59	8.41	24.36	28.52
STSL	1600	2.51±0.25b	0.63±0.14a	58.89±3.57a	20.84±2.37a	8.62±1.08a	5.27±0.99c	3.02±0.98d
	1800	2.68±0.14b	0.41±0.21b	53.14±2.39b	21.17±2.31a	8.66±0.98a	6.11±1.29bc	5.44±1.02c
	2000	2.89±0.27ab	0.52±0.20ab	48.43±2.44c	22.19±1.29a	9.28±1.58a	7.27±1.54bc	7.57±0.97b
	2200	3.16±0.56a	0.56±0.19a	49.30±1.98c	22.97±1.98a	9.86±1.36a	8.54±2.01b	8.50±1.23ab
	2400	3.25±0.33a	0.40±0.14b	47.51±3.21c	23.22±1.45a	9.14±1.87a	11.5±2.28a	12.81±1.18a
	Mean	2.9	0.5	51.45	22.08	9.11	7.74	7.46
	SD	0.31	0.1	4.68	1.05	0.51	2.44	3.66
	CV/%	10.78	19.57	9.09	4.79	5.58	31.49	48.98
Note: Symbols represent the average, and standard deviation indicates SE (n=5). Different letters indicate significance at P < 0.05, and the same letters indicate significance at P ≤0.05. CV/%= SD/Mean *100%.
