# Supplementary material for: Effects of Low Nighttime Temperature on Fatty Acid Content in Developing Seeds from Brassica napus L. Based on RNA-Seq and Metabolome
Source: Plants (Basel). 2023 Jan 10;12(2):325. doi: 10.3390/plants12020325 (PMC9862530; doi:10.3390/plants12020325)
Supplement: Supplementary file 1 [file plants-12-00325-s001.zip › Table S3.xlsx]

## Sheet: S3
Table S3 Base quality analysis of base quality and sequence alignment
Sample	RawDatas	CleanData(%)	Adapter(%)	LowQuality(%)	polyA(%)	Total_Mapped(%)	Unique_Mapped(%)	Multiple_Mapped(%)		BF_Q20(%)	BF_Q30(%)	BF_N(%)	BF_GC(%)
SSE18-1	67396500	67148142 (99.63%)	21888 (0.03%)	226020 (0.34%)	0 (0.00%)	61759515 (92.32%)	49743366 (74.35%)	12016149 (17.96%)		9805254055 (96.99%)	9302350126 (92.02%)	133944 (0.00%)	4857291971 (48.05%)
SSE18-2	71382868	71132336 (99.65%)	23636 (0.03%)	226316 (0.32%)	0 (0.00%)	65215955 (92.14%)	52532274 (74.22%)	12683681 (17.92%)		10396094676 (97.09%)	9871573244 (92.19%)	146855 (0.00%)	5072568748 (47.37%)
SSE18-3	77616314	77405326 (99.73%)	23290 (0.03%)	186988 (0.24%)	0 (0.00%)	71350541 (92.69%)	57329029 (74.48%)	14021512 (18.22%)		11352097126 (97.51%)	10831638136 (93.04%)	158810 (0.00%)	5539552859 (47.58%)
SFE18-1	54249700	54079362 (99.69%)	13076 (0.02%)	156620 (0.29%)	0 (0.00%)	50343393 (93.72%)	41258015 (76.81%)	9085378 (16.91%)		7939176088 (97.56%)	7591416965 (93.29%)	120270 (0.00%)	3979136398 (48.90%)
SFE18-2	59315230	59094834 (99.63%)	15804 (0.03%)	203966 (0.34%)	0 (0.00%)	54841071 (93.31%)	44726435 (76.10%)	10114636 (17.21%)		8657121482 (97.30%)	8256681341 (92.80%)	130515 (0.00%)	4342067995 (48.80%)
SFE18-3	60054140	59822198 (99.61%)	16666 (0.03%)	214640 (0.36%)	0 (0.00%)	55475194 (93.23%)	45091545 (75.78%)	10383649 (17.45%)		8769421120 (97.35%)	8369175379 (92.91%)	133750 (0.00%)	4376823433 (48.59%)
STE18-1	51777600	51581466 (99.62%)	12990 (0.03%)	182516 (0.35%)	0 (0.00%)	47690082 (93.29%)	38932046 (76.16%)	8758036 (17.13%)		7563055332 (97.38%)	7218297111 (92.94%)	117153 (0.00%)	3781279345 (48.69%)
STE18-2	55337182	55160064 (99.68%)	13014 (0.02%)	163510 (0.30%)	0 (0.00%)	51135692 (93.69%)	41873890 (76.72%)	9261802 (16.97%)		8093986793 (97.51%)	7736856238 (93.21%)	121397 (0.00%)	4057898244 (48.89%)
STE18-3	61746848	61487104 (99.58%)	16660 (0.03%)	242428 (0.39%)	0 (0.00%)	56566289 (92.92%)	45734914 (75.12%)	10831375 (17.79%)		8996177793 (97.13%)	8563505843 (92.46%)	136557 (0.00%)	4492351204 (48.50%)
SSE13-1	62045210	61822248 (99.64%)	22536 (0.04%)	199934 (0.32%)	0 (0.00%)	56694367 (91.98%)	45545588 (73.89%)	11148779 (18.09%)		9034660699 (97.08%)	8581115706 (92.20%)	127237 (0.00%)	4365398818 (46.91%)
SSE13-2	74273530	74042886 (99.69%)	24752 (0.03%)	205326 (0.28%)	0 (0.00%)	68030139 (92.16%)	54600472 (73.97%)	13429667 (18.19%)		10827277311 (97.18%)	10291267693 (92.37%)	149522 (0.00%)	5208425459 (46.75%)
SSE13-3	76820542	76591228 (99.70%)	25848 (0.03%)	202868 (0.26%)	0 (0.00%)	70386397 (92.25%)	56651455 (74.25%)	13734942 (18.00%)		11194738530 (97.15%)	10634785262 (92.29%)	155489 (0.00%)	5401735700 (46.88%)
SFE13-1	55547322	55337430 (99.62%)	15088 (0.03%)	194188 (0.35%)	0 (0.00%)	51345528 (93.26%)	41963715 (76.22%)	9381813 (17.04%)		8114976762 (97.39%)	7747447062 (92.98%)	124620 (0.00%)	4011970265 (48.15%)
SFE13-2	62507686	62290124 (99.65%)	19090 (0.03%)	197812 (0.32%)	0 (0.00%)	57793546 (93.32%)	46956493 (75.82%)	10837053 (17.50%)		9149866526 (97.59%)	8759096250 (93.42%)	138850 (0.00%)	4515057049 (48.15%)
SFE13-3	63420134	63187502 (99.63%)	19506 (0.03%)	212490 (0.34%)	0 (0.00%)	58615846 (93.20%)	47588884 (75.67%)	11026962 (17.53%)		9257834218 (97.32%)	8831563382 (92.84%)	141000 (0.00%)	4600035043 (48.36%)
STE13-1	57438216	57244100 (99.66%)	15780 (0.03%)	177750 (0.31%)	0 (0.00%)	53229123 (93.50%)	43262332 (76.00%)	9966791 (17.51%)		8394441145 (97.43%)	8018350607 (93.07%)	125527 (0.00%)	4208843347 (48.85%)
STE13-2	51211144	51044790 (99.68%)	14202 (0.03%)	151606 (0.30%)	0 (0.00%)	47526241 (93.54%)	38870373 (76.50%)	8655868 (17.04%)		7479486484 (97.37%)	7132874757 (92.86%)	113050 (0.00%)	3739981263 (48.69%)
STE13-3	54764470	54578344 (99.66%)	14534 (0.03%)	170992 (0.31%)	0 (0.00%)	50565515 (93.52%)	41178048 (76.16%)	9387467 (17.36%)		8008827079 (97.49%)	7655045972 (93.19%)	121720 (0.00%)	4008743459 (48.80%)
OSE18-1	55481688	55267184 (99.61%)	16194 (0.03%)	197904 (0.36%)	0 (0.00%)	50274204 (91.48%)	40513109 (73.72%)	9761095 (17.76%)		8067012111 (96.93%)	7650470516 (91.93%)	113090 (0.00%)	3957638160 (47.55%)
OSE18-2	55011744	54810142 (99.63%)	15684 (0.03%)	185458 (0.34%)	0 (0.00%)	50039438 (91.74%)	40588486 (74.42%)	9450952 (17.33%)		7981915089 (96.73%)	7549198628 (91.49%)	111727 (0.00%)	3992535330 (48.38%)
OSE18-3	51324908	51186270 (99.73%)	12054 (0.02%)	126206 (0.25%)	0 (0.00%)	47298312 (92.74%)	38293180 (75.09%)	9005132 (17.66%)		7501895333 (97.44%)	7153429965 (92.92%)	104787 (0.00%)	3755809593 (48.78%)
OFE18-1	46922460	46775078 (99.69%)	10986 (0.02%)	135928 (0.29%)	0 (0.00%)	43522928 (93.48%)	35249087 (75.71%)	8273841 (17.77%)		6866487075 (97.56%)	6563973344 (93.26%)	103740 (0.00%)	3435254905 (48.81%)
OFE18-2	51839424	51662220 (99.66%)	13228 (0.03%)	163456 (0.32%)	0 (0.00%)	48327583 (93.92%)	38876875 (75.55%)	9450708 (18.37%)		7580452430 (97.49%)	7245994979 (93.19%)	115246 (0.00%)	3815879653 (49.07%)
OFE18-3	49556402	49398138 (99.68%)	12156 (0.02%)	145618 (0.29%)	0 (0.00%)	46160333 (93.83%)	37178062 (75.57%)	8982271 (18.26%)		7251005780 (97.55%)	6929712241 (93.22%)	109226 (0.00%)	3650551143 (49.11%)
OTE18-1	50283456	50083334 (99.60%)	13110 (0.03%)	186482 (0.37%)	0 (0.00%)	46056157 (92.74%)	37719255 (75.96%)	8336902 (16.79%)		7335963880 (97.26%)	6992231156 (92.70%)	111465 (0.00%)	3687504384 (48.89%)
OTE18-2	51522880	51303374 (99.57%)	14930 (0.03%)	204028 (0.40%)	0 (0.00%)	46346923 (91.79%)	37923096 (75.11%)	8423827 (16.68%)		7516918940 (97.26%)	7165586265 (92.72%)	113142 (0.00%)	3718765595 (48.12%)
OTE18-3	51107230	50892248 (99.58%)	13970 (0.03%)	200454 (0.39%)	0 (0.00%)	47144299 (93.06%)	38022195 (75.05%)	9122104 (18.01%)		7458252733 (97.29%)	7111552581 (92.77%)	113367 (0.00%)	3733079599 (48.70%)
OSE13-1	47531414	47418598 (99.76%)	16972 (0.04%)	95434 (0.20%)	0 (0.00%)	43506837 (92.03%)	35133585 (74.31%)	8373252 (17.71%)		6970101758 (97.76%)	6666067664 (93.50%)	95920 (0.00%)	3343433452 (46.89%)
OSE13-2	68962914	68718032 (99.64%)	24634 (0.04%)	219760 (0.32%)	0 (0.00%)	62333765 (91.04%)	50303759 (73.47%)	12030006 (17.57%)		10032245361 (96.98%)	9515528304 (91.99%)	138500 (0.00%)	4830700786 (46.70%)
OSE13-3	68836708	68588676 (99.64%)	26134 (0.04%)	221392 (0.32%)	0 (0.00%)	62652120 (91.64%)	50346074 (73.64%)	12306046 (18.00%)		10035993219 (97.20%)	9539702035 (92.39%)	140054 (0.00%)	4842157386 (46.90%)
OFE13-1	63683862	63464232 (99.66%)	18372 (0.03%)	200614 (0.32%)	0 (0.00%)	58772812 (92.90%)	47449208 (75.00%)	11323604 (17.90%)		9311524834 (97.48%)	8890627632 (93.07%)	139964 (0.00%)	4605300326 (48.21%)
OFE13-2	58186366	57999510 (99.68%)	14436 (0.02%)	171702 (0.30%)	0 (0.00%)	53932535 (93.42%)	43657039 (75.62%)	10275496 (17.80%)		8524887831 (97.67%)	8163468666 (93.53%)	133160 (0.00%)	4215754111 (48.30%)
OFE13-3	58521052	58313914 (99.65%)	16346 (0.03%)	190174 (0.32%)	0 (0.00%)	54122469 (93.15%)	43945159 (75.63%)	10177310 (17.52%)		8557310905 (97.48%)	8178721415 (93.17%)	128328 (0.00%)	4220996548 (48.09%)
OTE13-1	56131458	55939228 (99.66%)	15332 (0.03%)	176268 (0.31%)	0 (0.00%)	52098877 (93.64%)	42458957 (76.32%)	9639920 (17.33%)		8224573653 (97.68%)	7877541938 (93.56%)	125529 (0.00%)	4118612977 (48.92%)
OTE13-2	47177786	47009370 (99.64%)	11764 (0.02%)	156170 (0.33%)	0 (0.00%)	43505120 (93.44%)	35518430 (76.29%)	7986690 (17.15%)		6891031161 (97.38%)	6574942246 (92.91%)	103360 (0.00%)	3484853470 (49.24%)
OTE13-3	44736112	44593518 (99.68%)	10890 (0.02%)	131266 (0.29%)	0 (0.00%)	41641961 (94.05%)	34081529 (76.97%)	7560432 (17.07%)		6543067806 (97.51%)	6251899172 (93.17%)	98561 (0.00%)	3289268331 (49.02%)
