# Supplementary material for: Effects of Low Nighttime Temperature on Fatty Acid Content in Developing Seeds from Brassica napus L. Based on RNA-Seq and Metabolome
Source: Plants (Basel). 2023 Jan 10;12(2):325. doi: 10.3390/plants12020325 (PMC9862530; doi:10.3390/plants12020325)
Supplement: Supplementary file 1 [file plants-12-00325-s001.zip › Table S4.xls]

Table S4 Analysis of DEGs from WTSL in HNT
id	Symbol	SFE18-1	SFE18-2	SFE18-3	SSE18-1	SSE18-2	SSE18-3	STE18-1	STE18-2	STE18-3	STE18	SSE18	SFE18	SSE18-vs-SFE18-log2fc	SSE18-vs-SFE18-pvalue	SSE18-vs-SFE18-fdr	SFE18-vs-STE18-log2fc	SFE18-vs-STE18-pvalue	SFE18-vs-STE18-fdr	Description	Pathway	GO Component	GO Function	GO Process
MSTRG.1018	RE1	0.28	0.38	0.63	2.24	1.28	1.36	0.3	0.05	0	0.1167	1.6267	0.43	-1.919510082	0.004164776	0.033823807	-1.881944238	0.105409717	0.301327922	copia-like polyprotein [Arabidopsis thaliana]	-	-	-	-
MSTRG.10286	TATB	1.87	1.6	1.63	3.9	5.25	5.29	0.55	1.16	0.72	0.81	4.8133	1.7	-1.50150159	0.001338235	0.013137717	-1.069540933	0.040571734	0.151360758	BnaA03g12600D [Brassica napus]	-	GO:0009526//plastid envelope;GO:0031224//intrinsic component of membrane;GO:0031976//plastid thylakoid;GO:0043234//protein complex;GO:0044434//chloroplast part	GO:0015291//secondary active transmembrane transporter activity;GO:0022892//substrate-specific transporter activity	GO:0006612//protein targeting to membrane;GO:0009668//plastid membrane organization;GO:0009886//post-embryonic morphogenesis;GO:0071806//protein transmembrane transport
MSTRG.10441	At1g61900	0.35	0.32	0.64	0.9	0.82	0.77	2.02	0.97	1.52	1.5033	0.83	0.4367	-0.926578931	0.381380764	0.789380927	1.783560622	7.05E-06	0.000105894	uncharacterized GPI-anchored protein At1g61900 isoform X1 [Brassica rapa]	-	GO:0016020//membrane	-	-
MSTRG.10454	BIP2	23.91	32.04	29.29	57.15	63.63	55.6	13.19	16.1	16.34	15.21	58.7933	28.4133	-1.049084483	0.000227227	0.002881568	-0.901547939	2.22E-06	3.79E-05	mediator of RNA polymerase II transcription subunit 37f [Brassica rapa]	ko04141//Protein processing in endoplasmic reticulum;ko03060//Protein export	GO:0005911//cell-cell junction;GO:0009536//plastid;GO:0030312//external encapsulating structure;GO:0031090//organelle membrane;GO:0043232//intracellular non-membrane-bounded organelle;GO:0043234//protein complex;GO:0044432//endoplasmic reticulum part	GO:0016628//oxidoreductase activity, acting on the CH-CH group of donors, NAD or NADP as acceptor;GO:0032550//purine ribonucleoside binding	GO:0000741//karyogamy;GO:0009725//response to hormone;GO:0010038//response to metal ion;GO:0010468//regulation of gene expression;GO:0022613//ribonucleoprotein complex biogenesis;GO:0033554//cellular response to stress;GO:0034645//cellular macromolecule biosynthetic process;GO:0043161//proteasome-mediated ubiquitin-dependent protein catabolic process;GO:0044710//single-organism metabolic process
MSTRG.10544	MYB101	1.23	1.75	1.24	5.27	6.68	5.99	0.18	0.3	0.53	0.3367	5.98	1.4067	-2.087864986	2.19E-10	9.61E-09	-2.062887706	8.63E-05	0.000954852	transcription factor MYB101 [Brassica rapa]	ko04626//Plant-pathogen interaction	GO:0042995//cell projection;GO:0043231//intracellular membrane-bounded organelle	GO:0001071//nucleic acid binding transcription factor activity;GO:0003676//nucleic acid binding	GO:0003006//developmental process involved in reproduction;GO:0006355//regulation of transcription, DNA-templated;GO:0009685//gibberellin metabolic process;GO:0009787//regulation of abscisic acid-activated signaling pathway;GO:0010476//gibberellin mediated signaling pathway;GO:0012501//programmed cell death;GO:0040008//regulation of growth;GO:0048229//gametophyte development
MSTRG.10685	PER21	14.8	19.47	15.05	62.55	51.44	69.73	5.79	6.26	4.1	5.3833	61.24	16.44	-1.897263984	1.27E-12	7.68E-11	-1.610638635	2.31E-08	6.13E-07	peroxidase 21 [Brassica rapa]	ko01100//Metabolic pathways;ko01110//Biosynthesis of secondary metabolites;ko00940//Phenylpropanoid biosynthesis	GO:0044444//cytoplasmic part	GO:0003824//catalytic activity;GO:0016209//antioxidant activity;GO:0043169//cation binding;GO:0046906//tetrapyrrole binding	GO:0006950//response to stress;GO:0009620//response to fungus;GO:0042743//hydrogen peroxide metabolic process;GO:0043436//oxoacid metabolic process;GO:0044272//sulfur compound biosynthetic process;GO:0044711//single-organism biosynthetic process;GO:0044765//single-organism transport;GO:1901576//organic substance biosynthetic process
MSTRG.10724	--	3.73	2.89	2.6	3.37	4.49	3.38	0.9	1.17	0.31	0.7933	3.7467	3.0733	-0.28580338	0.339232331	0.748619752	-1.953805177	0.001919709	0.013345992	BnaCnng43780D [Brassica napus]	-	-	-	-
MSTRG.10815	PI1	2.56	1.67	1.97	0	0	0.05	5.45	8.44	11.54	8.4767	0.0167	2.0667	6.95419631	7.34E-09	2.48E-07	2.036191341	4.45E-09	1.38E-07	protease inhibitor HPI [Brassica napus]	-	GO:0030312//external encapsulating structure	GO:0004866//endopeptidase inhibitor activity;GO:0016787//hydrolase activity	GO:0006812//cation transport;GO:0006950//response to stress;GO:0009620//response to fungus;GO:0010466//negative regulation of peptidase activity
MSTRG.10948	--	4.52	11.07	9.96	16.04	15.1	16.06	0.37	1.43	0.26	0.6867	15.7333	8.5167	-0.885463568	0.3375157	0.746674689	-3.632607049	1.68E-07	3.75E-06	transmembrane protein [Arabidopsis thaliana]	-	-	-	-
MSTRG.10949	--	27.56	35.13	36.87	48.4	48.01	43.79	0.7	2.59	1.98	1.7567	46.7333	33.1867	-0.493848214	0.56026655	0.912868244	-4.239691363	3.11E-31	1.49E-28	transmembrane protein [Arabidopsis thaliana]	-	-	-	-
MSTRG.11047	--	0.24	0	0.22	0	0.39	0.35	3.98	0.48	1.67	2.0433	0.2467	0.1533	-0.68589141	0.995187724	0.997990452	3.736181308	0.000279387	0.002619543	Vacuolar protein sorting-associated protein 62 [Arabidopsis suecica]	-	GO:0009536//plastid	-	-
MSTRG.11098	SPH11	2.49	4.31	3.01	5.9	10.39	7.47	0.09	0.42	0.38	0.2967	7.92	3.27	-1.276209795	0.005096707	0.039739458	-3.462375895	2.69E-13	1.64E-11	PREDICTED: pentatricopeptide repeat-containing protein At1g10270-like [Brassica oleracea var. oleracea] [Brassica oleracea]	-	GO:0043231//intracellular membrane-bounded organelle	GO:0005488//binding	GO:0001101//response to acid chemical;GO:0009793//embryo development ending in seed dormancy;GO:0010467//gene expression;GO:0016070//RNA metabolic process;GO:0044763//single-organism cellular process
MSTRG.11142	--	0.47	0.32	0.75	3.89	5.01	3.29	0	0	0.32	0.1067	4.0633	0.5133	-2.98469587	8.75E-05	0.001235593	-2.266786541	0.180473182	0.43477265	pollen coat protein B13 [Brassica oleracea]	-	-	-	-
MSTRG.11429	--	0.08	0.07	0	0.19	0.24	0.44	0.89	0.3	0.76	0.65	0.29	0.05	-2.5360529	0.231716393	0.617043808	3.700439718	0.006010406	0.033933821	hypothetical protein HID58_012564 [Brassica napus]	-	-	-	-
MSTRG.11568	--	197.45	257.37	283.68	141.14	212.84	166.06	55.97	76.18	100.44	77.53	173.3467	246.1667	0.505975325	7.79E-18	1.02E-15	-1.66680885	4.45E-14	3.01E-12	EMBRYO SURROUNDING FACTOR 1.2-like [Eutrema salsugineum]	-	-	-	-
MSTRG.11605	BGLU11	1.14	1.14	1.14	1.99	2.27	2.03	0.42	0.6	0.5	0.5067	2.0967	1.14	-0.879063692	0.278038049	0.679229238	-1.169925001	0.00410421	0.024851822	PREDICTED: beta-glucosidase 11 isoform X2 [Brassica oleracea var. oleracea] [Brassica oleracea]	ko01100//Metabolic pathways;ko01110//Biosynthesis of secondary metabolites;ko00940//Phenylpropanoid biosynthesis;ko00500//Starch and sucrose metabolism;ko00460//Cyanoamino acid metabolism	-	-	-
MSTRG.11644	--	0.28	1.12	0.6	3.04	5.65	2.71	0	0	0	0	3.8	0.6667	-2.510961919	0.001598218	0.015263452	-9.380821784	0.002695378	0.017656701	BnaCnng68060D [Brassica napus]	-	-	-	-
MSTRG.11666	At1g56220	1.1	0.5	1.27	0.08	0.17	0.47	0.98	1.64	1.23	1.2833	0.24	0.9567	1.994981925	0.000704771	0.00764718	0.423807709	0.306830741	0.609183029	dormancy-associated protein homolog 3 isoform X4 [Brassica rapa]	-	GO:0043231//intracellular membrane-bounded organelle	-	GO:0008104//protein localization;GO:0009725//response to hormone
MSTRG.11740	At4g01450	1.82	1.85	1.69	4.66	5.66	8.4	0.89	0.25	0.52	0.5533	6.24	1.7867	-1.804275529	3.04E-06	6.05E-05	-1.691049759	0.00061919	0.005145518	WAT1-related protein At4g01450 [Brassica rapa]	-	-	-	-
MSTRG.11742	At4g01450	1.8	1.84	2.57	3.06	2.28	3.85	1	0.94	0.88	0.94	3.0633	2.07	-0.565471593	0.964904102	0.994882214	-1.138898106	0.00104591	0.008016078	WAT1-related protein At4g01450 isoform X1 [Brassica rapa]	-	-	-	-
MSTRG.11868	TPLATE	0.28	0.16	0.63	0.12	0.22	0.24	0.67	1.1	1.18	0.9833	0.1933	0.3567	0.883485991	0.014441523	0.091110835	1.463104158	0.001716693	0.012171052	serine/threonine-protein phosphatase 6 regulatory ankyrin repeat subunit B [Brassica rapa]	-	-	-	-
MSTRG.11982	--	0.22	0.4	0.79	3.52	6.63	3.76	0	0	0	0	4.6367	0.47	-3.302355352	1.32E-05	0.000226551	-8.876516947	0.023102894	0.098535219	transmembrane protein [Arabidopsis thaliana]	-	-	-	-
MSTRG.12020	LCR18	4.23	6.3	7.53	36.37	54.12	47.59	0.12	0	0	0.04	46.0267	6.02	-2.934634572	5.98E-29	2.84E-26	-7.233619677	1.19E-08	3.38E-07	BnaC03g34050D [Brassica napus]	-	-	-	GO:0050896//response to stimulus;GO:0051704//multi-organism process
MSTRG.12038	FH11	0.16	0.42	0.31	0.58	0.5	0.62	0.02	0.09	0	0.0367	0.5667	0.2967	-0.933657505	0.454313901	0.851224615	-3.016301812	0.005462926	0.031471026	formin-like protein 11 [Brassica rapa]	-	GO:0015629//actin cytoskeleton;GO:0031224//intrinsic component of membrane;GO:0043231//intracellular membrane-bounded organelle	-	GO:0007015//actin filament organization;GO:0048449//floral organ formation
MSTRG.1209	--	0.36	0.41	0.41	0	0	0	3.81	3.79	3.84	3.8133	0	0.3933	8.619608644	0.001362515	0.013340876	3.277228287	9.15E-10	3.21E-08	-	-	-	-	-
MSTRG.1214	ATTI7	0.64	2.49	1.41	4.42	1.47	1.85	0	0.24	0	0.08	2.58	1.5133	-0.769641269	0.712868009	0.954998406	-4.241585987	0.000489998	0.004229235	BnaA04g25120D [Brassica napus]	-	-	-	GO:0006950//response to stress;GO:0009620//response to fungus
MSTRG.1215	ATTI1	1.27	1	1.32	2.85	3.43	2.47	0	0.09	0	0.03	2.9167	1.1967	-1.285299173	0.131387741	0.444564103	-5.317915032	0.000304495	0.002819529	BnaC04g48990D [Brassica napus]	-	-	-	GO:0006950//response to stress;GO:0009620//response to fungus
MSTRG.12221	MYBC1	27.69	32.62	31.03	49.29	58.21	46.95	17.91	12.38	11.86	14.05	51.4833	30.4467	-0.757821176	0.234141772	0.620160106	-1.115714159	3.10E-05	0.000392234	PREDICTED: transcription factor LUX-like [Brassica oleracea var. oleracea] [Brassica oleracea]	-	-	GO:0005488//binding	GO:0010468//regulation of gene expression
MSTRG.12429	SCL27	1.79	2.58	2.29	4.66	5.09	5.42	0.82	0.84	0.92	0.86	5.0567	2.22	-1.187627003	0.001934002	0.017918311	-1.368151112	9.12E-06	0.000133025	scarecrow-like protein 27 [Brassica rapa]	-	GO:0043231//intracellular membrane-bounded organelle	GO:0001071//nucleic acid binding transcription factor activity;GO:0046914//transition metal ion binding;GO:0090595//acetyl-CoA:L-lysine N6-acetyltransferase	GO:0000226//microtubule cytoskeleton organization;GO:0000904//cell morphogenesis involved in differentiation;GO:0006259//DNA metabolic process;GO:0009411//response to UV;GO:0010074//maintenance of meristem identity;GO:0010468//regulation of gene expression;GO:0034645//cellular macromolecule biosynthetic process;GO:0042127//regulation of cell proliferation
MSTRG.12494	--	0.89	0.83	1.14	0.67	1.47	2.22	0.21	0	0.09	0.1	1.4533	0.9533	-0.608312988	0.994834939	0.997876701	-3.252980741	0.000217845	0.002116806	hypothetical protein F2Q69_00046758 [Brassica cretica]	-	-	-	-
MSTRG.12495	--	0	0	0.05	0.72	0.4	0.17	0.14	0	0	0.0467	0.43	0.0167	-4.689299161	0.003263484	0.027713542	1.485426827	0.554086038	0.834987947	01P13-2 [Brassica rapa subsp. pekinensis] [Brassica rapa]	-	-	-	-
MSTRG.12496	--	1.58	1.42	2.68	0.94	2.97	4.14	0.17	0.24	0.21	0.2067	2.6833	1.8933	-0.503097853	0.806929564	0.97358954	-3.195550809	8.59E-09	2.52E-07	01P13-2 [Brassica rapa subsp. pekinensis] [Brassica rapa]	-	-	-	-
MSTRG.12510	--	8.91	10.86	14.28	13.7	24.53	27.08	1.4	1.75	0.84	1.33	21.77	11.35	-0.93964911	0.103516318	0.381246046	-3.093194147	9.39E-22	1.68E-19	hypothetical protein F2Q69_00046758 [Brassica cretica]	-	-	-	-
MSTRG.12511	--	2.4	2.98	4.82	2.38	6.77	5.71	0.07	0.02	0.31	0.1333	4.9533	3.4	-0.542864964	0.866939972	0.988645308	-4.672425342	1.51E-16	1.44E-14	01P13-2 [Brassica rapa subsp. pekinensis] [Brassica rapa]	-	-	-	-
MSTRG.12765	CRSH	0.85	1.03	1.27	1.56	2.22	2.08	0.45	0.46	0.56	0.49	1.9533	1.05	-0.895548836	0.190383407	0.553250915	-1.099535674	0.001738498	0.012294785	probable GTP diphosphokinase CRSH, chloroplastic [Brassica rapa]	ko00230//Purine metabolism	GO:0009536//plastid	GO:0016778//diphosphotransferase activity;GO:0016794//diphosphoric monoester hydrolase activity	GO:0009150//purine ribonucleotide metabolic process
MSTRG.12863	--	0	0	0.07	0.73	1.08	0.64	0	0	0	0	0.8167	0.0233	-5.129283017	0.004166138	0.033827552	-4.544320516	0.844666575	0.931138542	PREDICTED: leucine-rich repeat extensin-like protein 5 [Raphanus sativus]	-	-	-	-
MSTRG.12867	--	4.79	3.49	8.72	4.2	6.29	13.89	0.73	0.81	2.52	1.3533	8.1267	5.6667	-0.52016338	0.733552061	0.961423073	-2.065983114	1.78E-08	4.84E-07	BnaUnng01880D [Brassica napus]	-	-	-	-
MSTRG.12868	--	1	2.45	2.45	2.6	6.55	5.88	0.06	0.37	0.27	0.2333	5.01	1.9667	-1.34905815	0.047874869	0.225258209	-3.075288127	7.32E-07	1.41E-05	hypothetical protein Bca52824_053923 [Brassica carinata]	-	-	-	-
MSTRG.12870	--	0.84	1.47	1.87	1.17	2.76	3.66	0.31	0.13	0	0.1467	2.53	1.3933	-0.860596943	0.569998286	0.919410628	-3.247927513	0.000252035	0.002397634	hypothetical protein IGI04_042743 [Brassica rapa subsp. trilocularis] [Brassica rapa]	-	-	-	-
MSTRG.12871	--	0.39	0.38	0.6	1.1	2.12	2.23	0	0.03	0.08	0.0367	1.8167	0.4567	-1.992080337	0.000404879	0.00474684	-3.638600464	0.000333325	0.00304689	hypothetical protein Bca52824_053923 [Brassica carinata]	-	-	-	-
MSTRG.12964	--	2.12	2.21	2.14	2.57	2.72	2.75	0.83	1.43	0.93	1.0633	2.68	2.1567	-0.313429789	0.20893759	0.582330108	-1.020209288	0.008357958	0.044362807	hypothetical protein IGI04_029618 [Brassica rapa subsp. trilocularis] [Brassica rapa]	-	-	-	-
MSTRG.13032	GAD4	0.24	0.91	0.32	3.61	4.71	5.4	0.04	0	0.03	0.0233	4.5733	0.49	-3.222392421	9.45E-10	3.75E-08	-4.392317423	0.001303231	0.009665098	glutamate decarboxylase 4 [Brassica rapa]	ko01100//Metabolic pathways;ko01110//Biosynthesis of secondary metabolites;ko00250//Alanine, aspartate and glutamate metabolism;ko00410//beta-Alanine metabolism;ko00650//Butanoate metabolism;ko00430//Taurine and hypotaurine metabolism	GO:0043231//intracellular membrane-bounded organelle;GO:0044444//cytoplasmic part	GO:0005515//protein binding;GO:0016705//oxidoreductase activity, acting on paired donors, with incorporation or reduction of molecular oxygen;GO:0016831//carboxy-lyase activity;GO:0043168//anion binding;GO:0043169//cation binding	GO:0006605//protein targeting;GO:0006873//cellular ion homeostasis;GO:0006970//response to osmotic stress;GO:0009064//glutamine family amino acid metabolic process;GO:0009746//response to hexose;GO:0009891//positive regulation of biosynthetic process;GO:0010038//response to metal ion;GO:0030001//metal ion transport;GO:0042044//fluid transport;GO:0043067//regulation of programmed cell death
MSTRG.13034	NPF8.4	0.65	0.54	0.77	0.59	0.93	1	0.07	0.12	0.06	0.0833	0.84	0.6533	-0.362570079	0.580014821	0.92273394	-2.970853654	0.000165664	0.001674364	LOW QUALITY PROTEIN: protein NRT1/ PTR FAMILY 8.4 [Brassica rapa]	-	GO:0016020//membrane	-	GO:0006810//transport
MSTRG.13042	--	1.5	0.54	1.55	0.56	0.42	0.42	2.48	1.63	1.18	1.7633	0.4667	1.1967	1.358557017	0.000835924	0.008841697	0.559283878	0.21008521	0.480346624	hypothetical protein IGI04_007901 [Brassica rapa subsp. trilocularis] [Brassica rapa]	-	-	-	-
MSTRG.1314	--	0.03	0.06	0	0	0	0	0.34	0.35	0.32	0.3367	0	0.03	4.906890596	0.31059719	0.716915893	3.488286481	0.002273562	0.015365683	hypothetical protein IGI04_001030 [Brassica rapa subsp. trilocularis] [Brassica rapa]	-	-	-	-
MSTRG.13201	--	9.8	9.93	7.06	6.05	8.27	11.52	3.46	4.89	4.36	4.2367	8.6133	8.93	0.052088511	0.022058242	0.126285598	-1.075730551	0.005186262	0.030201699	unnamed protein product [Brassica oleracea]	-	-	-	-
MSTRG.13220	ICL	6.2	5.06	4.28	0.77	0.29	0.4	126.22	57.95	89.34	91.17	0.4867	5.18	3.41194623	3.02E-30	1.61E-27	4.137535173	1.67E-44	2.59E-41	isocitrate lyase [Brassica rapa]	ko01100//Metabolic pathways;ko01110//Biosynthesis of secondary metabolites;ko01200//Carbon metabolism;ko00630//Glyoxylate and dicarboxylate metabolism	GO:0005777//peroxisome	GO:0016833//oxo-acid-lyase activity	GO:0003006//developmental process involved in reproduction;GO:0006101//citrate metabolic process;GO:0044262//cellular carbohydrate metabolic process
MSTRG.13262	IP5P5	1.52	1.96	1.26	3.55	3.35	2.45	0.38	1.06	0.57	0.67	3.1167	1.58	-0.980079306	0.146562733	0.474912406	-1.237691558	0.008021816	0.042909796	type I inositol polyphosphate 5-phosphatase 5 [Eutrema salsugineum]	-	-	-	GO:0000904//cell morphogenesis involved in differentiation;GO:0009664//plant-type cell wall organization;GO:0009826//unidimensional cell growth;GO:0010053//root epidermal cell differentiation;GO:0043647//inositol phosphate metabolic process;GO:0044723//single-organism carbohydrate metabolic process
MSTRG.13269	--	3.03	4.47	3.65	4.42	9.46	8.25	0.11	0.61	0.75	0.49	7.3767	3.7167	-0.988959741	0.165294111	0.509861378	-2.92315565	9.46E-09	2.74E-07	BnaA09g05740D [Brassica napus]	-	-	-	-
MSTRG.13327	--	4.02	3.5	3.22	1.84	1.27	1.42	2.64	3.28	3.43	3.1167	1.51	3.58	1.245411038	1.17E-08	3.78E-07	-0.199955723	0.558955364	0.839558303	PREDICTED: ABC transporter B family member 1-like [Raphanus sativus]	ko02010//ABC transporters	GO:0005911//cell-cell junction;GO:0016020//membrane	GO:0005515//protein binding;GO:0015562//efflux transmembrane transporter activity;GO:0080161//auxin transmembrane transporter activity	GO:0000904//cell morphogenesis involved in differentiation;GO:0007015//actin filament organization;GO:0009409//response to cold;GO:0009630//gravitropism;GO:0009639//response to red or far red light;GO:0010053//root epidermal cell differentiation;GO:0010928//regulation of auxin mediated signaling pathway;GO:0022610//biological adhesion;GO:0032535//regulation of cellular component size;GO:0043479//…
MSTRG.13328	--	1.43	1.3	1.91	0	0.32	0.44	2.29	3.26	1.84	2.4633	0.2533	1.5467	2.610053482	6.36E-07	1.47E-05	0.671449559	0.047307142	0.169441559	PREDICTED: ABC transporter B family member 1-like [Raphanus sativus]	ko02010//ABC transporters	GO:0005911//cell-cell junction;GO:0016020//membrane	GO:0005515//protein binding;GO:0015562//efflux transmembrane transporter activity;GO:0080161//auxin transmembrane transporter activity	GO:0000904//cell morphogenesis involved in differentiation;GO:0007015//actin filament organization;GO:0009409//response to cold;GO:0009630//gravitropism;GO:0009639//response to red or far red light;GO:0010053//root epidermal cell differentiation;GO:0010928//regulation of auxin mediated signaling pathway;GO:0022610//biological adhesion;GO:0032535//regulation of cellular component size;GO:0043479//…
MSTRG.13549	PDV2	3.97	4.92	4.76	9.93	7.47	7.72	0.28	1.26	0.83	0.79	8.3733	4.55	-0.879935513	0.181223804	0.537471751	-2.525941987	3.66E-08	9.29E-07	plastid division protein PDV2 isoform X2 [Brassica rapa]	-	GO:0031355//integral component of plastid outer membrane	GO:0005488//binding	GO:0048285//organelle fission
MSTRG.13773	--	15.21	15.54	18.17	28.04	31.03	25.64	6.13	9.59	6.68	7.4667	28.2367	16.3067	-0.792107886	0.180595412	0.53645745	-1.126925672	4.72E-05	0.000566083	hypothetical protein DY000_02002738 [Brassica cretica]	-	-	-	-
MSTRG.13840	--	1.14	0.98	1.02	0.58	0.21	0.25	1.07	1.26	1.46	1.2633	0.3467	1.0467	1.594181031	3.64E-06	7.12E-05	0.271433289	0.208863313	0.478502153	BnaC06g03170D [Brassica napus]	-	-	-	-
MSTRG.13927	PUB4	4.02	4.56	4.23	7.25	9.02	7.66	1.04	2.35	2.01	1.8	7.9767	4.27	-0.901549921	0.054197792	0.246054609	-1.246239163	0.000271567	0.002556834	U-box domain-containing protein 4 [Brassica rapa]	-	-	GO:0003824//catalytic activity	GO:0006970//response to osmotic stress;GO:0006996//organelle organization
MSTRG.13947	COG4	0.69	0.64	0.24	0.58	0.81	0.86	0.04	0.1	0.15	0.0967	0.75	0.5233	-0.519160442	0.831139062	0.97358954	-2.436639754	0.007375268	0.040060977	conserved oligomeric Golgi complex subunit 4-like [Brassica napus]	-	GO:0043231//intracellular membrane-bounded organelle;GO:0044444//cytoplasmic part	-	GO:0008104//protein localization;GO:0016192//vesicle-mediated transport;GO:0022406//membrane docking;GO:0061024//membrane organization
MSTRG.14003	At4g09580	9.53	8.62	8.2	3.21	1.34	1.68	5.39	7.62	6.61	6.54	2.0767	8.7833	2.080498894	3.91E-15	3.45E-13	-0.42547792	0.160960799	0.402768675	uncharacterized membrane protein At4g09580 [Brassica rapa]	-	GO:0043231//intracellular membrane-bounded organelle	-	GO:0046474//glycerophospholipid biosynthetic process
MSTRG.14022	--	1.25	0.16	1.59	3.19	2.51	4.11	0.08	0	0.11	0.0633	3.27	1	-1.709290636	0.049565045	0.230921964	-3.980891177	0.000550819	0.004668593	hypothetical protein DY000_02044201, partial [Brassica cretica]	-	-	-	-
MSTRG.14068	--	0.9	0.92	1.76	1.71	2.64	1.94	0.17	0.24	0.07	0.16	2.0967	1.1933	-0.81310043	0.601440457	0.932788184	-2.898853277	0.001296541	0.009626318	hypothetical protein F2Q68_00001372 [Brassica cretica]	-	-	-	-
MSTRG.14128	--	0.93	0.8	0.85	0.31	0.25	0.4	1.32	1.84	1.57	1.5767	0.32	0.86	1.426264755	0.002015154	0.018542136	0.874469118	0.04339563	0.159067029	unnamed protein product [Brassica napus]	-	-	-	-
MSTRG.14148	TPS07	4.81	5.35	5.31	2.77	1.18	1.67	2.48	5.39	3.85	3.9067	1.8733	5.1567	1.460831161	1.05E-10	4.83E-09	-0.400500627	0.284805468	0.582929866	Terpenoid cyclases/protein prenyltransferase alpha-alpha toroid [Arabidopsis suecica]	-	GO:0005911//cell-cell junction;GO:0009536//plastid	-	GO:0006714//sesquiterpenoid metabolic process;GO:0046246//terpene biosynthetic process
MSTRG.14150	TPS07	2.94	3.43	2.48	1.58	0.73	1.06	1.37	2.69	2.79	2.2833	1.1233	2.95	1.392928864	1.08E-08	3.53E-07	-0.369573467	0.393540047	0.702856486	Terpenoid cyclases/protein prenyltransferase alpha-alpha toroid [Arabidopsis suecica]	-	GO:0009536//plastid	GO:0016829//lyase activity	GO:0046246//terpene biosynthetic process
MSTRG.14314	--	0	0.05	0.05	0.51	0.95	0.69	0	0.15	0.18	0.11	0.7167	0.0333	-4.426264755	0.002320007	0.020868594	1.722466024	0.348921118	0.658657735	BnaA03g45780D [Brassica napus]	-	-	-	-
MSTRG.14410	abhd17c	0.29	0.45	0.31	1.36	1.23	0.77	0.88	0.69	0.77	0.78	1.12	0.35	-1.678071905	0.023077461	0.130595165	1.156119202	0.008736835	0.045994146	alpha/beta hydrolase domain-containing protein 17C [Brassica rapa]	ko00062//Fatty acid elongation	-	GO:0003824//catalytic activity	GO:0042127//regulation of cell proliferation
MSTRG.14515	carC	1.47	1.55	1.61	1.75	1.55	1.61	0.35	0.99	0.78	0.7067	1.6367	1.5433	-0.084710831	0.029937681	0.158789415	-1.126947929	0.008711412	0.045881691	Cryptochrome/photolyase N-terminal domain superfamily [Arabidopsis thaliana x Arabidopsis arenosa]	-	-	GO:0003824//catalytic activity	-
MSTRG.14753	FEY	1.16	1.66	1.16	1.8	1.37	1.87	0.07	0.21	0.19	0.1567	1.68	1.3267	-0.340655303	0.425569888	0.827825636	-3.082035769	1.13E-08	3.23E-07	dehydrogenase/reductase SDR family member FEY-like [Brassica rapa]	-	-	GO:0016628//oxidoreductase activity, acting on the CH-CH group of donors, NAD or NADP as acceptor	GO:0044710//single-organism metabolic process
MSTRG.14793	At2g25060	0	0	0	0.32	0.5	0.18	0	0	0	0	0.3333	0	-8.380821784	0.000196183	0.002532617	0	1	1	early nodulin-like protein 2 [Brassica rapa]	-	GO:0031224//intrinsic component of membrane	GO:0046914//transition metal ion binding	-
MSTRG.14866	SCT	3.4	2.73	2.27	0.6	0.1	0.25	2.72	3.17	2.96	2.95	0.3167	2.8	3.144389909	3.99E-13	2.59E-11	0.075288127	0.560895992	0.841341305	BnaA03g49740D [Brassica napus]	-	-	GO:0016410//N-acyltransferase activity	GO:0044710//single-organism metabolic process;GO:0044763//single-organism cellular process;GO:0045491//xylan metabolic process;GO:0050896//response to stimulus
MSTRG.14893	VLN4	0.99	0.97	1.22	2.07	3.1	2.54	1.05	1.11	1.11	1.09	2.57	1.06	-1.277704095	0.000814258	0.008653911	0.04026387	0.550920266	0.832223652	villin-4 [Brassica rapa]	-	GO:0043232//intracellular non-membrane-bounded organelle;GO:0044444//cytoplasmic part	GO:0003779//actin binding	GO:0001101//response to acid chemical;GO:0022607//cellular component assembly;GO:0030835//negative regulation of actin filament depolymerization;GO:0046907//intracellular transport;GO:0048588//developmental cell growth
MSTRG.1492	--	0.19	0.42	0.48	2.23	1.98	1.14	0.08	0.11	0	0.0633	1.7833	0.3633	-2.295210757	0.00116358	0.011693812	-2.520256811	0.035798572	0.137932458	BnaCnng11820D [Brassica napus]	-	-	-	-
MSTRG.14983	--	4.14	3.81	5.57	2.36	2.97	4.14	1.67	2.03	2.68	2.1267	3.1567	4.5067	0.513658821	1.88E-08	5.88E-07	-1.083466823	4.33E-06	6.85E-05	BnaC01g21130D [Brassica napus]	-	-	-	-
MSTRG.15146	--	24.18	43.53	55.84	52.13	85.16	80.22	0.64	1.78	1.44	1.2867	72.5033	41.1833	-0.81598672	0.346302619	0.755485103	-5.000350353	1.08E-33	6.26E-31	transmembrane protein [Arabidopsis thaliana]	-	-	-	-
MSTRG.15167	--	0.54	0.7	0.83	1.1	2.5	1.67	0.03	0.25	0.05	0.11	1.7567	0.69	-1.348172194	0.057370925	0.255778448	-2.649092838	0.00175653	0.012401242	BnaC01g41670D, partial [Brassica napus]	ko03420//Nucleotide excision repair;ko03440//Homologous recombination;ko03030//DNA replication;ko03430//Mismatch repair	-	-	-
MSTRG.15393	--	1.06	1.44	1.42	0.92	0.88	0.69	0.16	0.65	0.27	0.36	0.83	1.3067	0.654707912	0.004777803	0.037701898	-1.859822342	0.007214074	0.039358409	-	-	-	-	-
MSTRG.15452	CSE	0.55	0.51	1.04	1.01	0.7	0.9	1.57	1.42	1.36	1.45	0.87	0.7	-0.313660479	0.600118073	0.932645182	1.050626073	0.008163827	0.043531051	caffeoylshikimate esterase isoform X1 [Brassica rapa]	ko01100//Metabolic pathways;ko00561//Glycerolipid metabolism	GO:0016020//membrane	GO:0016298//lipase activity	-
MSTRG.15461	--	1.18	1.24	0.71	0.6	2.34	2.2	0.08	0	0.08	0.0533	1.7133	1.0433	-0.715605702	0.908085305	0.994882214	-4.290018847	0.00074686	0.006033391	hypothetical protein IGI04_043092 [Brassica rapa subsp. trilocularis] [Brassica rapa]	-	-	-	-
MSTRG.15477	RPL3	4.34	3.77	3.98	4.74	5.24	5.28	1.6	1.95	2.25	1.9333	5.0867	4.03	-0.335940718	0.18530594	0.544306273	-1.059689439	0.000799381	0.006385279	PREDICTED: U3 small nucleolar ribonucleoprotein protein MPP10-like isoform X3 [Raphanus sativus]	ko03008//Ribosome biogenesis in eukaryotes	GO:0032991//macromolecular complex;GO:0044424//intracellular part	-	-
MSTRG.15527	--	0.45	0.55	0.83	0.61	1.16	1.23	0.19	0.03	0.13	0.1167	1	0.61	-0.713118852	0.82071431	0.97358954	-2.386416821	0.004149343	0.025088715	E3 ubiquitin-protein ligase At1g63170 [Capsella rubella]	-	GO:0031090//organelle membrane	GO:0046914//transition metal ion binding	-
MSTRG.15529	LCR30	15.83	22.53	29.61	14.12	30.49	17.07	0.83	1.95	1.79	1.5233	20.56	22.6567	0.140095358	0.005374626	0.041503129	-3.894632052	2.89E-23	6.05E-21	defensin-like protein 122 [Eutrema salsugineum]	-	-	-	-
MSTRG.15530	LCR30	27.15	40.53	34.99	37.55	43.93	33.38	5.58	6.03	4.91	5.5067	38.2867	34.2233	-0.161861777	0.014030925	0.089145711	-2.635729098	4.39E-23	9.07E-21	defensin-like protein 122 [Eutrema salsugineum]	-	-	-	-
MSTRG.15618	TET15	0.4	0.39	0.32	0.09	0.06	0.07	5	1.94	3.12	3.3533	0.0733	0.37	2.334984248	7.29E-07	1.66E-05	3.179998723	9.11E-16	7.85E-14	Tetraspanin/Peripherin [Arabidopsis suecica]	-	-	-	-
MSTRG.1567	CSC1	4.45	4.93	4.37	8.04	11.1	9.93	2.17	3.1	2.13	2.4667	9.69	4.5833	-1.080099453	0.001388634	0.013549607	-0.893834443	0.002218237	0.015062567	calcium permeable stress-gated cation channel 1-like [Brassica napus]	-	GO:0031224//intrinsic component of membrane	GO:0005261//cation channel activity	GO:0006811//ion transport
MSTRG.15809	ADPG2	5.4	6.05	6.27	3.08	2	2.65	1.38	3.46	2.85	2.5633	2.5767	5.9067	1.196838285	5.68E-16	5.63E-14	-1.204323101	0.000442044	0.003870673	PREDICTED: polygalacturonase ADPG1-like [Raphanus sativus]	ko01100//Metabolic pathways;ko00040//Pentose and glucuronate interconversions	GO:0030312//external encapsulating structure;GO:0044424//intracellular part	GO:0004553//hydrolase activity, hydrolyzing O-glycosyl compounds	GO:0000904//cell morphogenesis involved in differentiation;GO:0003006//developmental process involved in reproduction;GO:0007275//multicellular organism development;GO:0009827//plant-type cell wall modification;GO:0009900//dehiscence;GO:0044238//primary metabolic process
MSTRG.15847	UBA2A	1.34	1.52	1.03	2.6	3.73	3.83	0.05	0.17	0.15	0.1233	3.3867	1.2967	-1.385058342	0.003882184	0.031927371	-3.394172979	5.23E-09	1.60E-07	UBP1-associated protein 2A [Eutrema salsugineum]	ko03040//Spliceosome	GO:0043231//intracellular membrane-bounded organelle;GO:0044444//cytoplasmic part	GO:0003723//RNA binding	GO:0006950//response to stress;GO:0009692//ethylene metabolic process;GO:0009755//hormone-mediated signaling pathway;GO:0010260//organ senescence;GO:0016265//death
MSTRG.15891	WLIM2B	0.21	0.39	0.5	0.66	0.47	0.15	0	0	0.04	0.0133	0.4267	0.3667	-0.218640286	0.665282814	0.937900256	-4.781359714	0.003528493	0.022005988	LIM domain-containing protein WLIM2b [Brassica rapa]	-	-	GO:0043169//cation binding	-
MSTRG.15894	--	1.39	1.2	2.02	1.63	0.72	1.11	4.05	2.75	3.82	3.54	1.1533	1.5367	0.413994713	0.039738681	0.1964397	1.20394511	0.000160088	0.001623394	hypothetical protein F2Q68_00014014 [Brassica cretica]	-	-	-	-
MSTRG.1593	--	0.92	0.22	1.02	0.51	0.67	0.33	0	0	0	0	0.5033	0.72	0.516482763	0.183897514	0.542271074	-9.491853096	0.001660619	0.011831268	BnaCnng17490D [Brassica napus]	-	-	-	-
MSTRG.16007	MVD2	9.93	10.31	11.62	14.81	13.98	13.65	5.03	5.33	5.04	5.1333	14.1467	10.62	-0.413678389	0.225341775	0.607696523	-1.048815916	6.43E-08	1.56E-06	diphosphomevalonate decarboxylase MVD2, peroxisomal [Brassica rapa]	ko01100//Metabolic pathways;ko01110//Biosynthesis of secondary metabolites;ko00900//Terpenoid backbone biosynthesis	GO:0044444//cytoplasmic part	GO:0016772//transferase activity, transferring phosphorus-containing groups;GO:0016831//carboxy-lyase activity;GO:0032550//purine ribonucleoside binding;GO:0046983//protein dimerization activity	GO:0006084//acetyl-CoA metabolic process;GO:0006796//phosphate-containing compound metabolic process;GO:0016104//triterpenoid biosynthetic process;GO:0016129//phytosteroid biosynthetic process
MSTRG.16117	--	0.19	0.31	0.1	0.16	0.3	0.63	0.93	0.64	0.62	0.73	0.3633	0.2	-0.861293729	0.813671775	0.97358954	1.867896464	0.005524066	0.031740903	AT3g52230/F4F15_340 [Arabidopsis thaliana]	-	GO:0009527//plastid outer membrane;GO:0044434//chloroplast part	-	-
MSTRG.16185	--	0.94	1.73	1.33	1.6	3.83	3.33	0.18	0.38	0.58	0.38	2.92	1.3333	-1.13093087	0.201220994	0.570241108	-1.810966176	0.003288223	0.020769562	BnaCnng73940D [Brassica napus]	-	-	-	-
MSTRG.16261	MUB6	0.42	0.17	0.17	0	0	0	0.2	0.14	0.19	0.1767	0	0.2533	7.984893108	9.36E-05	0.00131239	-0.520007059	0.623777619	0.875708084	BnaAnng17130D [Brassica napus]	-	GO:0016020//membrane	-	-
MSTRG.16361	IBS1	1.43	1.51	1.76	3.68	5.75	4.17	0.09	1.14	0.7	0.6433	4.5333	1.5667	-1.53287399	1.61E-06	3.40E-05	-1.284059909	0.058180343	0.197548891	LOW QUALITY PROTEIN: protein IMPAIRED IN BABA-INDUCED STERILITY 1 [Brassica rapa]	-	-	GO:0004674//protein serine/threonine kinase activity;GO:0036094//small molecule binding;GO:0097159//organic cyclic compound binding;GO:1901363//heterocyclic compound binding	GO:0006796//phosphate-containing compound metabolic process;GO:0044238//primary metabolic process;GO:0044260//cellular macromolecule metabolic process
MSTRG.16377	VTI11	0.12	0.07	0	0.03	0.03	0	1.33	0.93	1.53	1.2633	0.02	0.0633	1.662965013	0.291668941	0.695898397	4.318126525	1.33E-07	3.03E-06	PREDICTED: vesicle transport v-SNARE 11-like [Brassica oleracea var. oleracea] [Brassica oleracea]	ko04130//SNARE interactions in vesicular transport	GO:0012505//endomembrane system;GO:0043231//intracellular membrane-bounded organelle;GO:0044444//cytoplasmic part	-	GO:0015031//protein transport;GO:0016192//vesicle-mediated transport;GO:1902582//single-organism intracellular transport
MSTRG.16398	YUC10	0.59	1.27	1.38	0.1	1.18	2.19	0	0.12	0.16	0.0933	1.1567	1.08	-0.09894185	0.275510714	0.676307657	-3.532495081	0.006008793	0.033929559	probable indole-3-pyruvate monooxygenase YUCCA10 [Brassica rapa]	ko01100//Metabolic pathways;ko00380//Tryptophan metabolism	-	GO:0000166//nucleotide binding;GO:0016709//oxidoreductase activity, acting on paired donors, with incorporation or reduction of molecular oxygen, NAD(P)H as one donor, and incorporation of one atom of oxygen	GO:0009653//anatomical structure morphogenesis;GO:0009850//auxin metabolic process;GO:0042743//hydrogen peroxide metabolic process;GO:0044710//single-organism metabolic process
MSTRG.16463	BHLH71	4.89	4.94	4.68	8.41	3.78	7.24	0.02	0.85	0.1	0.3233	6.4767	4.8367	-0.421238382	0.633936345	0.932788184	-3.902918962	0.002664231	0.017496139	PREDICTED: transcription factor bHLH71 [Brassica oleracea var. oleracea] [Brassica oleracea]	-	GO:0043231//intracellular membrane-bounded organelle	GO:0001071//nucleic acid binding transcription factor activity;GO:0003676//nucleic acid binding;GO:0005515//protein binding	GO:0010468//regulation of gene expression;GO:0034645//cellular macromolecule biosynthetic process;GO:0044707//single-multicellular organism process
MSTRG.16475	--	1.37	0.71	1.37	1.28	1.15	1.36	3.29	2.06	2.24	2.53	1.2633	1.15	-0.135601487	0.33673936	0.745703278	1.137503524	0.002356497	0.015826109	PREDICTED: LOW QUALITY PROTEIN: uncharacterized F-box/LRR-repeat protein C02F5.7 [Brassica oleracea var. oleracea] [Brassica oleracea]	-	-	-	GO:0006952//defense response
MSTRG.16555	--	1.68	3.27	2.4	5.07	7.85	8.68	0.45	0.25	0.73	0.4767	7.2	2.45	-1.555215157	0.004406024	0.035326747	-2.361729103	0.000122111	0.001286448	hypothetical protein IGI04_012476 [Brassica rapa subsp. trilocularis] [Brassica rapa]	-	-	-	-
MSTRG.16565	TPS09	0.23	0.23	0.19	0.02	0.02	0	10.43	4.39	6.93	7.25	0.0133	0.2167	4.022367813	0.000105378	0.001458859	5.064431873	3.72E-34	2.26E-31	BnaA08g30440D [Brassica napus]	-	GO:0005911//cell-cell junction;GO:0009536//plastid	GO:0016838//carbon-oxygen lyase activity, acting on phosphates	GO:0006714//sesquiterpenoid metabolic process;GO:0009664//plant-type cell wall organization;GO:0046246//terpene biosynthetic process
MSTRG.16635	--	3.84	3.49	2.97	2.31	2.57	2.3	8.7	5.84	7.1	7.2133	2.3933	3.4333	0.520588588	0.00022056	0.002807453	1.071056162	9.47E-05	0.001035445	hypothetical protein HID58_061944 [Brassica napus]	-	-	-	-
MSTRG.16842	--	1.54	1.44	3.32	0.89	0.86	1.33	1.08	1.56	1.89	1.51	1.0267	2.1	1.032421478	6.93E-05	0.00100422	-0.475840778	0.40177446	0.711250962	unnamed protein product [Brassica napus]	-	-	-	-
MSTRG.16862	--	4.62	5.89	7.16	4.49	8.8	7.86	0.3	1.12	0.81	0.7433	7.05	5.89	-0.259355623	0.145138952	0.471977593	-2.986186425	6.82E-12	3.36E-10	MATH/TRAF domain [Arabidopsis thaliana x Arabidopsis arenosa]	-	-	-	-
MSTRG.16900	--	0.84	1.19	0.79	1.9	3.73	3.93	0.12	0.6	0.2	0.3067	3.1867	0.94	-1.761315456	0.000442864	0.005132555	-1.615989396	0.017846635	0.08073196	Retrotransposon gag domain [Arabidopsis suecica]	-	-	-	-
MSTRG.17123	--	5.93	3.79	4.82	3.96	4.26	4.59	14.14	8.49	11.62	11.4167	4.27	4.8467	0.182756794	0.002365491	0.021203154	1.236076719	5.57E-06	8.57E-05	unnamed protein product, partial [Brassica napus]	-	-	-	-
MSTRG.17314	--	9.97	20.32	19.38	34.51	62.1	44.43	0.16	0.96	0.58	0.5667	47.0133	16.5567	-1.505657728	8.35E-05	0.001185596	-4.868768095	8.74E-26	2.37E-23	Neprosin activation peptide [Arabidopsis thaliana x Arabidopsis arenosa]	-	-	-	-
MSTRG.17345	SCPL26	21.25	27.15	25.12	28.61	27.91	27.09	6.5	13.03	8.91	9.48	27.87	24.5067	-0.185538737	0.002236784	0.020236114	-1.370215302	2.27E-06	3.85E-05	serine carboxypeptidase-like 26 isoform X2 [Brassica rapa]	-	GO:0043231//intracellular membrane-bounded organelle	GO:0004180//carboxypeptidase activity	GO:0000226//microtubule cytoskeleton organization;GO:0019538//protein metabolic process
MSTRG.17603	PI1	0	0	0.24	0.07	0.14	1.39	7.94	0.26	1.27	3.1567	0.5333	0.08	-2.736965594	0.225378115	0.607765715	5.302258115	0.00011512	0.001223887	BnaA04g11270D [Brassica napus]	-	GO:0030312//external encapsulating structure	GO:0004866//endopeptidase inhibitor activity;GO:0016787//hydrolase activity	GO:0006812//cation transport;GO:0006950//response to stress;GO:0009620//response to fungus;GO:0010466//negative regulation of peptidase activity
MSTRG.17605	--	0.97	0.89	1.08	0.38	0	0.07	11.88	5.48	8.21	8.5233	0.15	0.98	2.707819249	8.47E-05	0.001200543	3.1205641	9.15E-21	1.45E-18	hypothetical protein Bca52824_044908 [Brassica carinata]	-	-	-	-
MSTRG.17675	At2g40290	0	0	0	1.09	0.26	0.95	0	0.14	0.04	0.06	0.7667	0	-9.582455645	5.77E-05	0.000852179	5.906890596	0.373622394	0.682237587	eukaryotic translation initiation factor 2 subunit alpha homolog, partial [Brassica napus]	ko04141//Protein processing in endoplasmic reticulum;ko03013//Nucleocytoplasmic transport	-	-	-
MSTRG.17778	--	1.93	2.36	2.24	3.81	2.98	3.24	0.72	1.24	0.71	0.89	3.3433	2.1767	-0.619166709	0.919614683	0.994882214	-1.29024325	0.008226991	0.04380127	unnamed protein product [Brassica napus]	-	-	-	-
MSTRG.17807	--	3.05	3.63	3.15	3.97	13.36	10.5	0.19	0.66	0.53	0.46	9.2767	3.2767	-1.501377587	0.006822632	0.050379387	-2.83252315	8.44E-12	4.11E-10	BnaCnng11940D [Brassica napus]	ko01100//Metabolic pathways;ko04145//Phagosome;ko04070//Phosphatidylinositol signaling system;ko00562//Inositol phosphate metabolism	-	-	-
MSTRG.18049	At2g47850	15.23	17.32	16.01	28.41	37.06	38.3	2.97	6.51	5.16	4.88	34.59	16.1867	-1.095549093	1.84E-05	0.00030804	-1.729852868	2.73E-09	8.81E-08	zinc finger CCCH domain-containing protein 32 isoform X1 [Brassica rapa]	-	GO:0043231//intracellular membrane-bounded organelle	GO:0003676//nucleic acid binding;GO:0043169//cation binding	-
MSTRG.18461	--	1.57	1.1	1.46	1.45	2.11	1.55	3.06	2.85	3.75	3.22	1.7033	1.3767	-0.30718151	0.248544442	0.640769905	1.225881407	3.75E-07	7.71E-06	serine/threonine-protein kinase PRP4 homolog [Brassica rapa]	-	GO:0043231//intracellular membrane-bounded organelle	GO:0003676//nucleic acid binding	-
MSTRG.18505	--	2.44	2.97	1.95	1.84	4.18	5.49	0.14	0.99	0.55	0.56	3.8367	2.4533	-0.645110162	0.980004693	0.994882214	-2.131244533	0.000604849	0.005045958	-	-	-	-	-
MSTRG.18548	DHDPS2	0.54	0.75	0.86	1.84	2.18	1.5	2.93	2.03	2.44	2.4667	1.84	0.7167	-1.360331607	0.026187384	0.143741035	1.783188611	2.68E-08	7.01E-07	4-hydroxy-tetrahydrodipicolinate synthase 2, chloroplastic [Brassica rapa]	ko01100//Metabolic pathways;ko01110//Biosynthesis of secondary metabolites;ko01230//Biosynthesis of amino acids;ko00300//Lysine biosynthesis;ko00261//Monobactam biosynthesis	GO:0009536//plastid	GO:0016836//hydro-lyase activity	GO:0006743//ubiquinone metabolic process;GO:0009085//lysine biosynthetic process
MSTRG.18549	ZPR1	1.62	2.07	1.53	3.56	3.77	2.64	0.06	0.31	0.19	0.1867	3.3233	1.74	-0.933543698	0.331791346	0.740837715	-3.220551075	4.08E-06	6.51E-05	PREDICTED: protein LITTLE ZIPPER 1 [Brassica oleracea var. oleracea] [Brassica oleracea]	-	-	GO:0005488//binding	-
MSTRG.18613	--	0.39	0.58	0.46	1.12	1.66	1.08	0.05	0.02	0.04	0.0367	1.2867	0.4767	-1.4325857	0.033086671	0.171187288	-3.700439718	8.16E-05	0.000910217	At3g22970 [Arabidopsis thaliana]	-	GO:0009536//plastid	-	-
MSTRG.18625	LHCB4.3	33.13	32.72	31.81	51.05	55.56	48.71	7.05	13.95	10.38	10.46	51.7733	32.5533	-0.669403929	0.564918639	0.916249228	-1.637922426	2.37E-09	7.73E-08	chlorophyll a-b binding protein CP29.3, chloroplastic [Brassica rapa]	ko01100//Metabolic pathways;ko00196//Photosynthesis - antenna proteins	GO:0009521//photosystem;GO:0009526//plastid envelope;GO:0031224//intrinsic component of membrane;GO:0031976//plastid thylakoid;GO:0044434//chloroplast part	GO:0043169//cation binding;GO:0046906//tetrapyrrole binding	GO:0000097//sulfur amino acid biosynthetic process;GO:0006091//generation of precursor metabolites and energy;GO:0009639//response to red or far red light;GO:0009642//response to light intensity;GO:0009725//response to hormone;GO:0016072//rRNA metabolic process;GO:0031399//regulation of protein modification process;GO:0034285//response to disaccharide;GO:0043269//regulation of ion transport
MSTRG.18642	GES	0.04	0	0	0.18	1.16	0.48	0.05	0	0.08	0.0433	0.6067	0.0133	-5.50779464	0.002240576	0.020263226	1.700439718	0.590212736	0.858875297	(E,E)-geranyllinalool synthase [Brassica rapa]	ko00904//Diterpenoid biosynthesis	GO:0043231//intracellular membrane-bounded organelle	GO:0016838//carbon-oxygen lyase activity, acting on phosphates;GO:0046872//metal ion binding	GO:0000302//response to reactive oxygen species;GO:0001101//response to acid chemical;GO:0009628//response to abiotic stimulus;GO:0009755//hormone-mediated signaling pathway;GO:0016101//diterpenoid metabolic process;GO:0051707//response to other organism
MSTRG.18643	--	1.51	1.71	1.4	6.48	3.54	3.94	0.56	0.51	0.09	0.3867	4.6533	1.54	-1.595334185	0.003495419	0.029309091	-1.993768046	0.001984462	0.013717783	Transposon En/Spm-like [Arabidopsis suecica]	-	-	-	-
MSTRG.18644	--	1.84	2.89	4.37	2.5	3.97	4.62	0.09	0.43	0.28	0.2667	3.6967	3.0333	-0.285320915	0.300964512	0.706821849	-3.50779464	7.29E-11	3.03E-09	BnaC07g15840D [Brassica napus]	-	-	-	-
MSTRG.18655	--	1.27	3.8	4.51	0.25	3.89	6	0.06	0.51	0.25	0.2733	3.38	3.1933	-0.081960091	0.612253685	0.932788184	-3.546329841	1.06E-07	2.48E-06	BnaC07g15840D [Brassica napus]	-	-	-	-
MSTRG.18656	--	16.28	22.68	23.4	18.15	32.68	35.96	1.46	4.44	3.88	3.26	28.93	20.7867	-0.476907896	0.490184933	0.875425096	-2.672714558	1.62E-13	1.01E-11	BnaC07g15840D [Brassica napus]	-	-	-	-
MSTRG.18663	--	0.55	1.06	1.16	1.56	3.01	2.94	0.07	0.09	0.28	0.1467	2.5033	0.9233	-1.438926931	0.02108604	0.122171121	-2.654310547	0.000208602	0.002040784	hypothetical protein IGI04_015347 [Brassica rapa subsp. trilocularis] [Brassica rapa]	-	-	-	-
MSTRG.18666	--	0.64	0.35	0.72	0.31	0.03	0.18	0.09	0.04	0	0.0433	0.1733	0.57	1.717412797	0.005703142	0.043546912	-3.717412797	0.001379724	0.010143928	BnaC03g71320D [Brassica napus]	-	-	-	-
MSTRG.18667	--	0.52	0.98	1.26	1.07	2.48	2.99	0.1	0.03	0.1	0.0767	2.18	0.92	-1.244622369	0.083584572	0.33218844	-3.584962501	1.28E-09	4.37E-08	01P13-2 [Brassica rapa subsp. pekinensis] [Brassica rapa]	-	-	-	-
MSTRG.18669	--	1.1	2.04	2.74	1.66	2.91	3.65	0.35	0.21	0.21	0.2567	2.74	1.96	-0.483322239	0.764486344	0.970363857	-2.932885804	5.65E-07	1.12E-05	hypothetical protein IGI04_042978 [Brassica rapa subsp. trilocularis] [Brassica rapa]	-	-	-	-
MSTRG.18693	--	0.79	1.1	1.06	3.06	4.27	5.09	0.33	0.13	0.25	0.2367	4.14	0.9833	-2.073878314	1.17E-06	2.54E-05	-2.054824025	0.000731311	0.005929583	LOW QUALITY PROTEIN: hypothetical protein HID58_022173, partial [Brassica napus]	-	-	-	-
MSTRG.18718	IAN9	2.23	3.13	3.12	4.62	5.65	5.23	0.41	1.02	0.83	0.7533	5.1667	2.8267	-0.870132046	0.156291088	0.492902295	-1.907741492	3.25E-06	5.31E-05	PREDICTED: protein AIG1-like [Raphanus sativus]	-	-	-	GO:0016192//vesicle-mediated transport
MSTRG.18719	GAUT12	0.74	1.54	0.7	1.03	2.58	1.65	0.24	0.1	0.33	0.2233	1.7533	0.9933	-0.819750469	0.705744264	0.954636737	-2.15307933	0.000375277	0.003368467	probable galacturonosyltransferase 12 [Arabidopsis lyrata subsp. lyrata] [Arabidopsis lyrata]	-	GO:0031224//intrinsic component of membrane;GO:0043231//intracellular membrane-bounded organelle	GO:0003677//DNA binding;GO:0008194//UDP-glycosyltransferase activity	GO:0000271//polysaccharide biosynthetic process;GO:0006259//DNA metabolic process;GO:0010087//phloem or xylem histogenesis;GO:0010413//glucuronoxylan metabolic process;GO:0033554//cellular response to stress;GO:0042546//cell wall biogenesis;GO:0045229//external encapsulating structure organization
MSTRG.19059	Tf2-12	0.17	0.11	0.21	0.4	1.08	1.09	0.16	1.59	1.17	0.9733	0.8567	0.1633	-2.390914705	3.05E-05	0.000483617	2.575114715	4.49E-05	0.000542924	Ty3/gypsy retrotransposon protein [Cucumis melo var. makuwa] [Cucumis melo]	-	-	-	-
MSTRG.19089	--	4.74	2.61	3.51	1.14	0.99	1.05	30.03	13.84	18.54	20.8033	1.06	3.62	1.771925433	3.74E-12	2.14E-10	2.522753109	8.16E-14	5.36E-12	hypothetical protein DY000_02058152 [Brassica cretica]	-	-	-	-
MSTRG.19163	--	0.52	0.92	0.73	2.39	2.42	4.35	0.74	0.2	0.26	0.4	3.0533	0.7233	-2.077652556	0.003615841	0.030087649	-0.854660637	0.377128312	0.68587469	LEAF RUST 10 DISEASE-RESISTANCE LOCUS RECEPTOR-LIKE PROTEIN KINASE-like 1.1 isoform X1 [Brassica napus]	-	-	-	-
MSTRG.19173	--	2.84	3.24	3.21	2.6	2.6	4.52	0.25	1.1	0.65	0.6667	3.24	3.0967	-0.065277717	0.135021927	0.452483505	-2.215678597	0.00018192	0.001816488	BnaC09g14490D [Brassica napus]	-	-	-	-
MSTRG.19214	--	1.45	0.31	1.25	0	0	0.06	13.45	11.29	11.79	12.1767	0.02	1.0033	5.648657176	4.52E-05	0.00068561	3.601246362	3.14E-18	3.68E-16	PREDICTED: cytochrome b561 and DOMON domain-containing protein At3g07570-like [Raphanus sativus]	-	-	-	-
MSTRG.1936	NPF5.2	113.52	119.97	128.59	85.79	41.73	51.22	73.68	91.6	78.66	81.3133	59.58	120.6933	1.01844596	0.000138318	0.001859518	-0.569782147	0.002139341	0.01460206	protein NRT1/ PTR FAMILY 5.2 isoform X1 [Brassica rapa]	-	GO:0031224//intrinsic component of membrane	-	GO:0015833//peptide transport;GO:0051707//response to other organism
MSTRG.19456	--	0.1	0.25	0.31	1.17	1.09	0.87	0	0.07	0	0.0233	1.0433	0.22	-2.245624728	0.005157084	0.040137572	-3.237039197	0.042552293	0.156855428	BnaA05g12270D [Brassica napus]	-	-	-	-
MSTRG.19530	CYP97A3	0.55	0.07	0.51	0.53	0.44	0.28	0	0	0	0	0.4167	0.3767	-0.145605322	0.598865878	0.932317213	-8.557144557	0.00265034	0.017417938	protein LUTEIN DEFICIENT 5, chloroplastic-like isoform X2 [Brassica napus]	ko01100//Metabolic pathways;ko01110//Biosynthesis of secondary metabolites;ko00906//Carotenoid biosynthesis	GO:0042170//plastid membrane	GO:0016712//oxidoreductase activity, acting on paired donors, with incorporation or reduction of molecular oxygen, reduced flavin or flavoprotein as one donor, and incorporation of one atom of oxygen;GO:0046906//tetrapyrrole binding;GO:0046914//transition metal ion binding	GO:0005982//starch metabolic process;GO:0005984//disaccharide metabolic process;GO:0006090//pyruvate metabolic process;GO:0006633//fatty acid biosynthetic process;GO:0006779//porphyrin-containing compound biosynthetic process;GO:0009893//positive regulation of metabolic process;GO:0016117//carotenoid biosynthetic process;GO:0046471//phosphatidylglycerol metabolic process
MSTRG.19613	--	1.33	0.78	0.8	0.47	1.39	1.9	0	0	0.1	0.0333	1.2533	0.97	-0.369713509	0.697989565	0.951128904	-4.862947248	0.005586072	0.032045967	hypothetical protein DY000_02029787 [Brassica cretica]	-	-	-	-
MSTRG.19622	--	0.16	0.3	0.15	1.46	3.26	2.25	0	0.03	0	0.01	2.3233	0.2033	-3.514277508	2.46E-09	9.11E-08	-4.345774837	0.006371565	0.035589234	-	-	-	-	-
MSTRG.19632	--	1.28	3.3	5.5	2.55	7.4	5.81	0.14	0.38	1.04	0.52	5.2533	3.36	-0.644771896	0.943816908	0.994882214	-2.691877705	0.002151184	0.014676562	BnaC06g42020D [Brassica napus]	-	-	-	-
MSTRG.19762	F-ATMBP	190.53	176.87	164.34	86.71	51.72	67.83	861.65	511.7	692.25	688.5333	68.7533	177.2467	1.36625693	9.79E-10	3.87E-08	1.957768004	2.63E-20	4.01E-18	jacalin-related lectin 34 isoform X1 [Brassica rapa]	-	GO:0043231//intracellular membrane-bounded organelle	-	GO:0003006//developmental process involved in reproduction;GO:0006950//response to stress;GO:0044699//single-organism process
MSTRG.19763	JAL5	30.79	30.81	28.6	14.42	8.29	11.91	151.59	92.36	121.31	121.7533	11.54	30.0667	1.381521709	2.15E-19	3.43E-17	2.017724433	6.11E-23	1.24E-20	jacalin-related lectin 34 isoform X2 [Brassica rapa]	-	GO:0005911//cell-cell junction;GO:0043231//intracellular membrane-bounded organelle;GO:0044444//cytoplasmic part	GO:0046914//transition metal ion binding	GO:0001101//response to acid chemical;GO:0006950//response to stress;GO:0007165//signal transduction;GO:0009628//response to abiotic stimulus;GO:0009725//response to hormone;GO:0019759//glycosinolate catabolic process;GO:0044271//cellular nitrogen compound biosynthetic process;GO:0050790//regulation of catalytic activity
MSTRG.19828	PI4KA1	0.67	0.54	0.61	0.83	1.05	1.2	2.84	1.89	2.78	2.5033	1.0267	0.6067	-0.7589919	0.800879576	0.97358954	2.044874457	7.10E-05	0.000808434	phosphatidylinositol 4-kinase alpha 1 [Arabidopsis lyrata subsp. lyrata] [Arabidopsis lyrata]	ko01100//Metabolic pathways;ko04070//Phosphatidylinositol signaling system;ko00562//Inositol phosphate metabolism	GO:0009536//plastid	GO:0005543//phospholipid binding;GO:0016772//transferase activity, transferring phosphorus-containing groups	GO:0046474//glycerophospholipid biosynthetic process;GO:0046488//phosphatidylinositol metabolic process;GO:0048017//inositol lipid-mediated signaling
MSTRG.19898	ABCC4	1.53	2.28	2.14	8.16	9.26	7.88	1.14	0.93	1.44	1.17	8.4333	1.9833	-2.088175811	7.66E-22	1.65E-19	-0.761418638	0.006320926	0.03536383	BnaA05g17490D [Brassica napus]	ko02010//ABC transporters	GO:0031224//intrinsic component of membrane	GO:0015405//P-P-bond-hydrolysis-driven transmembrane transporter activity;GO:0016628//oxidoreductase activity, acting on the CH-CH group of donors, NAD or NADP as acceptor;GO:0017111//nucleoside-triphosphatase activity;GO:0032550//purine ribonucleoside binding	GO:0044710//single-organism metabolic process;GO:0044763//single-organism cellular process;GO:0051234//establishment of localization
MSTRG.19943	--	1.14	1.48	1.34	3.88	4.65	4.42	1.21	1.25	1.63	1.3633	4.3167	1.32	-1.709379762	0.001310224	0.012910743	0.046600413	0.750146677	0.928158637	BnaCnng48580D [Brassica napus]	-	-	-	-
MSTRG.19957	TDT	1.3	1.33	0.81	0.82	0.36	0.38	2.24	2.83	1.37	2.1467	0.52	1.1467	1.140862536	0.000900788	0.009421844	0.904652123	0.020149841	0.088690478	Armadillo-type fold [Arabidopsis thaliana x Arabidopsis arenosa]	-	GO:0031224//intrinsic component of membrane;GO:0043231//intracellular membrane-bounded organelle	GO:0015556//C4-dicarboxylate transmembrane transporter activity	GO:0015740//C4-dicarboxylate transport;GO:0030001//metal ion transport;GO:0030641//regulation of cellular pH
MSTRG.20003	--	0.23	0.52	0.68	1.31	1.98	4.17	0.22	0.1	0.14	0.1533	2.4867	0.4767	-2.383160483	0.000317211	0.00384914	-1.636309381	0.033882135	0.132360405	hypothetical protein IGI04_019298 [Brassica rapa subsp. trilocularis] [Brassica rapa]	-	-	-	-
MSTRG.20118	NET1A	1.05	1.37	1.7	2.73	3.74	3.5	0.16	0.49	0.27	0.3067	3.3233	1.3733	-1.274949167	0.000108693	0.001500431	-2.162938571	3.36E-07	6.99E-06	protein NETWORKED 1A [Brassica rapa]	-	-	-	-
MSTRG.20291	DRB3	0.94	0.74	1.37	0.71	1.06	1.35	0.22	0.35	0.27	0.28	1.04	1.0167	-0.032736786	0.149367048	0.480036731	-1.86034801	0.000869052	0.006853877	double-stranded RNA-binding protein 3 isoform X2 [Brassica rapa]	-	-	-	GO:0002252//immune effector process;GO:0030422//production of siRNA involved in RNA interference
MSTRG.20307	CYP705A22	5.55	9.26	6.25	54.73	123.59	101.85	21.56	10.62	12.08	14.7533	93.39	7.02	-3.733725142	4.88E-19	7.44E-17	1.071498015	0.000391468	0.003491306	cytochrome P450 705A22 [Brassica rapa]	-	-	-	-
MSTRG.20347	--	0.45	0.4	0.46	0.58	1.22	1.11	0.05	0.05	0.12	0.0733	0.97	0.4367	-1.151452341	0.226775616	0.609606105	-2.573991383	0.001607996	0.01151708	nucleolar transcription factor 1-B-like [Brassica napus]	-	-	-	-
MSTRG.20580	--	0.44	0.71	0.8	3.01	4.36	4.04	0.12	0	0	0.04	3.8033	0.65	-2.548752763	0.00040812	0.004779366	-4.022367813	0.015873026	0.073513727	BnaA05g36870D [Brassica napus]	-	-	-	-
MSTRG.20679	NSP1	5.41	5.26	8.2	9.91	9.85	11.93	0.96	3.56	2.99	2.5033	10.5633	6.29	-0.747933237	0.435320214	0.834505639	-1.32920961	0.004505912	0.026872713	nitrile-specifier protein 1 [Brassica rapa]	-	GO:0005911//cell-cell junction;GO:0009536//plastid	GO:0005488//binding	GO:0000097//sulfur amino acid biosynthetic process;GO:0001101//response to acid chemical;GO:0003006//developmental process involved in reproduction;GO:0006511//ubiquitin-dependent protein catabolic process;GO:0006970//response to osmotic stress;GO:0006996//organelle organization;GO:0009062//fatty acid catabolic process;GO:0009404//toxin metabolic process;GO:0019759//glycosinolate catabolic proces…
MSTRG.20735	accB	19.27	23.95	23.38	43.91	53.54	50.37	3.68	9.51	6.64	6.61	49.2733	22.2	-1.150247396	3.70E-07	8.96E-06	-1.7478375	1.93E-07	4.24E-06	biotin carboxyl carrier protein of acetyl-CoA carboxylase [Brassica rapa]	-	GO:0009536//plastid	-	GO:0006873//cellular ion homeostasis;GO:0030001//metal ion transport
MSTRG.20867	--	1.56	1.35	1.33	0.16	0.23	0.07	3.76	3.37	4.71	3.9467	0.1533	1.4133	3.204358499	8.39E-06	0.000151081	1.481532911	0.000211796	0.002067686	LOW QUALITY PROTEIN: pentatricopeptide repeat-containing protein At3g14330 [Arabidopsis lyrata subsp. lyrata] [Arabidopsis lyrata]	-	-	-	-
MSTRG.21029	--	9.44	17.46	7.89	17.35	11.25	5.98	2.77	4.16	2.46	3.13	11.5267	11.5967	0.00873481	0.184363167	0.542900907	-1.889475616	6.44E-05	0.000742721	BnaA08g03530D [Brassica napus]	-	-	-	-
MSTRG.2126	PORB	10.44	13.32	12.99	44.94	54.08	46.18	0.94	2.55	2.15	1.88	48.4	12.25	-1.982225298	3.56E-32	2.28E-29	-2.703977182	4.77E-16	4.20E-14	protochlorophyllide reductase precursor [Arabidopsis thaliana]	ko01100//Metabolic pathways;ko01110//Biosynthesis of secondary metabolites;ko00860//Porphyrin metabolism	GO:0009527//plastid outer membrane;GO:0031976//plastid thylakoid;GO:0044434//chloroplast part	GO:0016628//oxidoreductase activity, acting on the CH-CH group of donors, NAD or NADP as acceptor	GO:0000097//sulfur amino acid biosynthetic process;GO:0005982//starch metabolic process;GO:0006091//generation of precursor metabolites and energy;GO:0006355//regulation of transcription, DNA-templated;GO:0006779//porphyrin-containing compound biosynthetic process;GO:0009725//response to hormone;GO:0009887//organ morphogenesis;GO:0048869//cellular developmental process
MSTRG.21350	--	87.52	115.45	127.87	68	96.97	90.2	21.45	24.76	41.12	29.11	85.0567	110.28	0.37467495	1.15E-12	6.98E-11	-1.921584428	2.48E-14	1.73E-12	unnamed protein product [Brassica rapa]	-	-	-	-
MSTRG.21752	SPH6	3.74	5	4.6	6.71	10.46	9.23	1.39	1.6	1.58	1.5233	8.8	4.4467	-0.984779263	0.02698211	0.146921548	-1.545492596	6.10E-10	2.20E-08	Plant self-incompatibility S1 [Arabidopsis thaliana x Arabidopsis arenosa]	ko03008//Ribosome biogenesis in eukaryotes	GO:0005911//cell-cell junction;GO:0043231//intracellular membrane-bounded organelle	-	GO:0006605//protein targeting
MSTRG.21775	PYRE-F	5.67	5.42	6.31	7.45	6.59	8.2	1.32	1.96	2.86	2.0467	7.4133	5.8	-0.354069482	0.212338845	0.587170929	-1.502776745	1.15E-06	2.10E-05	uridine 5'-monophosphate synthase [Eutrema salsugineum]	ko01100//Metabolic pathways;ko00240//Pyrimidine metabolism	GO:0044444//cytoplasmic part	GO:0016763//transferase activity, transferring pentosyl groups;GO:0016831//carboxy-lyase activity	GO:0006222//UMP biosynthetic process;GO:0019856//pyrimidine nucleobase biosynthetic process
MSTRG.21846	At5g67130	6.41	7.3	7.11	8.66	11.12	10.12	1.4	1.84	2.67	1.97	9.9667	6.94	-0.522175416	0.551320555	0.908390348	-1.816740033	1.64E-11	7.56E-10	PI-PLC X domain-containing protein At5g67130 isoform X2 [Brassica rapa]	-	GO:0005911//cell-cell junction	GO:0016772//transferase activity, transferring phosphorus-containing groups;GO:0042578//phosphoric ester hydrolase activity	GO:0006796//phosphate-containing compound metabolic process;GO:0044238//primary metabolic process
MSTRG.21856	HAT	0.38	0.32	0.34	0.76	1.45	1.03	0.86	0.37	0.65	0.6267	1.08	0.3467	-1.639410285	0.006549405	0.048748871	0.854149134	0.044353935	0.161576218	zinc finger BED domain-containing protein DAYSLEEPER [Brassica rapa]	-	-	GO:0005488//binding	-
MSTRG.21863	CDKF-4	1.81	1.81	1.9	2.77	3.57	4.3	7.11	3	5.1	5.07	3.5467	1.84	-0.946757979	0.202666113	0.572281732	1.462279981	9.40E-06	0.0001368	PREDICTED: cyclin-dependent kinase F-4-like isoform X1 [Brassica oleracea var. oleracea] [Brassica oleracea]	-	GO:0044424//intracellular part	GO:0016772//transferase activity, transferring phosphorus-containing groups	GO:0006417//regulation of translation;GO:0006486//protein glycosylation
MSTRG.21876	BCE2	0.99	1.02	1.31	0.77	1.25	1.82	0.11	0.52	0.27	0.3	1.28	1.1067	-0.209923069	0.251431056	0.644350634	-1.883186335	0.000741613	0.005995908	PREDICTED: lipoamide acyltransferase component of branched-chain alpha-keto acid dehydrogenase complex, mitochondrial [Brassica oleracea var. oleracea] [Brassica oleracea]	ko01100//Metabolic pathways;ko01110//Biosynthesis of secondary metabolites;ko00280//Valine, leucine and isoleucine degradation;ko00640//Propanoate metabolism	GO:0044429//mitochondrial part	GO:0030523//dihydrolipoamide S-acyltransferase activity;GO:0046914//transition metal ion binding	GO:0006631//fatty acid metabolic process;GO:0009267//cellular response to starvation;GO:0009642//response to light intensity;GO:0009746//response to hexose;GO:0034285//response to disaccharide
MSTRG.22076	PP2B15	0	0	0	0.12	0.36	0.18	0.7	0.1	0.68	0.4933	0.22	0	-7.781359714	0.038936499	0.193490998	8.94641896	0.000427946	0.003764264	F-box protein PP2-B15 [Brassica rapa]	-	GO:0043231//intracellular membrane-bounded organelle	GO:0005488//binding	-
MSTRG.22182	At3g16895	3.96	6.1	5.24	5.76	7.29	6.69	0.77	0.96	0.44	0.7233	6.58	5.1	-0.367590337	0.370077411	0.778586632	-2.817764705	1.88E-08	5.09E-07	PREDICTED: defensin-like protein 49 [Camelina sativa]	-	-	-	-
MSTRG.22276	ICS1	0	0	0	0.08	0	0	0.87	1.08	0.74	0.8967	0.0267	0	-4.736965594	0.983134282	0.994882214	9.808427957	9.21E-05	0.001011506	isochorismate synthase 1, chloroplastic [Eutrema salsugineum]	ko01100//Metabolic pathways;ko01110//Biosynthesis of secondary metabolites;ko00130//Ubiquinone and other terpenoid-quinone biosynthesis	GO:0009536//plastid	GO:0050486//intramolecular transferase activity, transferring hydroxy groups	GO:0002252//immune effector process;GO:0006091//generation of precursor metabolites and energy;GO:0006605//protein targeting;GO:0009617//response to bacterium;GO:0009620//response to fungus;GO:0009696//salicylic acid metabolic process;GO:0009755//hormone-mediated signaling pathway;GO:0009814//defense response, incompatible interaction;GO:0009863//salicylic acid mediated signaling pathway;GO:00102…
MSTRG.2230	At4g28400	2.21	2.12	2.25	4.18	5.6	5.3	1.65	1.89	2.33	1.9567	5.0267	2.1933	-1.19647694	0.000265429	0.003290067	-0.164727081	0.764499018	0.928158637	BnaC09g41410D [Brassica napus]	-	-	GO:0004721//phosphoprotein phosphatase activity;GO:0043169//cation binding	GO:0006568//tryptophan metabolic process;GO:0009683//indoleacetic acid metabolic process;GO:0009814//defense response, incompatible interaction
MSTRG.22562	--	0.54	0.83	0.82	0.22	0.57	0.91	6.05	3.03	6.59	5.2233	0.5667	0.73	0.365396123	0.216627842	0.593463281	2.839002405	8.96E-09	2.62E-07	BnaCnng65690D [Brassica napus]	-	-	-	-
MSTRG.2260	PSAN	1.32	2.19	1.6	4.92	4.86	3.66	0.52	0.71	0.68	0.6367	4.48	1.7033	-1.395137942	0.001700404	0.016074782	-1.419750653	0.000210124	0.00205399	BnaA01g17830D [Brassica napus]	-	GO:0009521//photosystem;GO:0031978//plastid thylakoid lumen;GO:0044434//chloroplast part	GO:0003824//catalytic activity;GO:0005515//protein binding;GO:0043167//ion binding	GO:0000097//sulfur amino acid biosynthetic process;GO:0006259//DNA metabolic process;GO:0006739//NADP metabolic process;GO:0009767//photosynthetic electron transport chain;GO:0031399//regulation of protein modification process
MSTRG.22615	NHX8	0.06	0.1	0.1	0.14	0.11	0.14	2.26	0.42	1.03	1.2367	0.13	0.0867	-0.584962501	0.956936384	0.994882214	3.834835658	2.06E-08	5.53E-07	sodium/hydrogen exchanger 8 isoform X1 [Brassica rapa]	-	GO:0016020//membrane	GO:0015291//secondary active transmembrane transporter activity	GO:0006812//cation transport;GO:0044763//single-organism cellular process
MSTRG.22644	--	0.06	0.02	0.06	0	0	0.04	0.73	0.25	0.97	0.65	0.0133	0.0467	1.807354922	0.23930386	0.627657866	3.799975392	3.46E-06	5.60E-05	BnaUnng01230D [Brassica napus]	-	-	-	-
MSTRG.22665	--	0.57	0.51	1.12	0.61	1.42	1.69	0.07	0.09	0.07	0.0767	1.24	0.7333	-0.757799098	0.693236909	0.949783049	-3.257797757	5.72E-09	1.73E-07	GAG-pre-integrase domain, partial [Arabidopsis suecica]	-	-	-	-
MSTRG.23167	IQD32	4.07	5.17	3.8	9.27	11.42	8.92	2.84	3.83	4.41	3.6933	9.87	4.3467	-1.183140621	0.000844809	0.008918383	-0.234985988	0.540210249	0.826839193	protein IQ-DOMAIN 32 isoform X1 [Brassica rapa]	-	GO:0009526//plastid envelope;GO:0016020//membrane;GO:0043234//protein complex	-	GO:0000097//sulfur amino acid biosynthetic process;GO:0001101//response to acid chemical;GO:0008380//RNA splicing;GO:0009409//response to cold
MSTRG.23247	MAP70.5	0.61	1.4	0.81	2.27	2.23	2.5	0.15	0.19	0.13	0.1567	2.3333	0.94	-1.311659759	0.073593207	0.304670869	-2.584962501	0.00085748	0.006780814	Pollen Ole e 1 allergen and extensin family protein [Arabidopsis thaliana]	-	GO:0031090//organelle membrane;GO:0036452//ESCRT complex	GO:0005488//binding	GO:0008104//protein localization;GO:0009408//response to heat;GO:0051668//localization within membrane;GO:1902582//single-organism intracellular transport
MSTRG.23258	LAX2	2.8	3.21	4.13	5.38	5.38	7.34	0.3	0.72	0.49	0.5033	6.0333	3.38	-0.835932045	0.248195754	0.640289659	-2.747437198	2.89E-12	1.51E-10	PREDICTED: auxin transporter-like protein 2 isoform X1 [Camelina sativa]	ko04075//Plant hormone signal transduction	GO:0016020//membrane	GO:0022857//transmembrane transporter activity	GO:0009653//anatomical structure morphogenesis;GO:0009725//response to hormone;GO:0010051//xylem and phloem pattern formation;GO:0010817//regulation of hormone levels;GO:0016049//cell growth;GO:0046942//carboxylic acid transport;GO:0048509//regulation of meristem development;GO:0048589//developmental growth;GO:0051707//response to other organism;GO:0071704//organic substance metabolic process
MSTRG.233	NAGS2	0.36	0.34	0.5	0.71	0.58	0.8	1.11	0.99	1.02	1.04	0.6967	0.4	-0.800468536	0.57379415	0.921154258	1.378511623	9.09E-05	0.001000198	probable amino-acid acetyltransferase NAGS2, chloroplastic [Brassica rapa]	ko01100//Metabolic pathways;ko01110//Biosynthesis of secondary metabolites;ko01230//Biosynthesis of amino acids;ko01210//2-Oxocarboxylic acid metabolism;ko00220//Arginine biosynthesis	GO:0009536//plastid	GO:0008080//N-acetyltransferase activity	GO:0006525//arginine metabolic process
MSTRG.23319	MRS2-1	0.37	0.8	0.68	0.92	1.33	1.18	0	0.06	0	0.02	1.1433	0.6167	-0.890683306	0.628129305	0.932788184	-4.94641896	0.00174561	0.01233846	magnesium transporter 2 [Arabidopsis thaliana]	-	GO:0043231//intracellular membrane-bounded organelle	GO:0046873//metal ion transmembrane transporter activity	GO:0044763//single-organism cellular process;GO:0070838//divalent metal ion transport
MSTRG.23427	--	41.67	59.38	71.55	46.81	92.87	66.54	7.48	9.17	16.9	11.1833	68.74	57.5333	-0.256751793	0.074997438	0.308733543	-2.363047793	4.68E-15	3.63E-13	BnaA06g16030D [Brassica napus]	-	-	-	-
MSTRG.23434	--	31.3	44.44	44.01	50.21	74.64	83.19	0.81	6.51	3.06	3.46	69.3467	39.9167	-0.796835287	0.277195893	0.678571965	-3.528147307	1.75E-11	8.04E-10	BnaA06g16030D [Brassica napus]	-	-	-	-
MSTRG.23439	RHF1A	3.05	2.93	3.51	3.04	4.35	4.34	1.07	1.03	1.02	1.04	3.91	3.1633	-0.305723021	0.207958062	0.580667835	-1.604862058	6.30E-06	9.58E-05	PREDICTED: E3 ubiquitin-protein ligase RHF1A-like isoform X2 [Brassica oleracea var. oleracea] [Brassica oleracea]	-	-	GO:0003824//catalytic activity;GO:0046914//transition metal ion binding	GO:0006464//cellular protein modification process;GO:0006952//defense response;GO:0007165//signal transduction;GO:0031323//regulation of cellular metabolic process;GO:0048229//gametophyte development;GO:0048856//anatomical structure development;GO:0051707//response to other organism;GO:0060255//regulation of macromolecule metabolic process;GO:0071229//cellular response to acid chemical;GO:0071310…
MSTRG.23456	--	5.35	5.19	5.53	11.95	16.31	17.04	1.97	3.1	2.85	2.64	15.1	5.3567	-1.495141121	2.55E-09	9.42E-08	-1.020797594	0.000136933	0.001419968	sn1-specific diacylglycerol lipase alpha [Eutrema salsugineum]	-	-	GO:0005515//protein binding;GO:0016298//lipase activity	GO:0006629//lipid metabolic process;GO:0050896//response to stimulus
MSTRG.23467	MRS2-1	0.47	0.86	0.76	1.64	1.85	2.24	0.11	0.15	0	0.0867	1.91	0.6967	-1.455032197	0.058474957	0.259193556	-3.006919414	0.005015044	0.029334671	magnesium transporter 2 [Arabidopsis thaliana]	-	GO:0043231//intracellular membrane-bounded organelle	GO:0046873//metal ion transmembrane transporter activity	GO:0030001//metal ion transport;GO:0044763//single-organism cellular process
MSTRG.23485	--	4	3.91	5.13	4.07	5.43	6.11	1.21	1.94	3.01	2.0533	5.2033	4.3467	-0.259526668	0.076045655	0.311583078	-1.081941614	0.00169402	0.012032962	BnaC08g21800D [Brassica napus]	ko03420//Nucleotide excision repair;ko03440//Homologous recombination;ko03030//DNA replication;ko03430//Mismatch repair	-	-	-
MSTRG.23749	--	0.65	0.69	0.92	1.14	1.7	1.21	1.87	1.07	1.77	1.57	1.35	0.7533	-0.841599135	0.465909831	0.859661302	1.059404287	0.001438539	0.010495363	Tetratricopeptide-like helical domain superfamily [Arabidopsis suecica]	-	-	-	-
MSTRG.23783	--	10.92	12.11	11	14.97	17.11	17.21	2.51	6.56	6.04	5.0367	16.43	11.3433	-0.53448783	0.550333976	0.907473071	-1.171303491	0.000694259	0.005675711	PREDICTED: uncharacterized RING finger protein C4G3.12c [Brassica oleracea var. oleracea] [Brassica oleracea]	-	-	-	GO:0006950//response to stress;GO:0009987//cellular process
MSTRG.23898	--	6.42	9.41	8.38	17.69	17.95	15.91	0.31	1.56	0.49	0.7867	17.1833	8.07	-1.090369348	0.0035602	0.029709233	-3.358744315	2.92E-11	1.29E-09	protein IQ-DOMAIN 1-like [Brassica napus]	-	GO:0043231//intracellular membrane-bounded organelle	-	GO:0009886//post-embryonic morphogenesis
MSTRG.23990	--	6.34	7.25	6.05	3.08	1.32	1.92	3.22	5.57	5.29	4.6933	2.1067	6.5467	1.635798466	1.00E-12	6.17E-11	-0.480147596	0.146181051	0.377305596	BnaA08g07770D [Brassica napus]	-	-	-	-
MSTRG.24240	HAM1	0	0.05	0.05	0.57	0.8	1.18	0	0	0	0	0.85	0.0333	-4.672425342	1.98E-05	0.000328515	-5.058893689	0.455833338	0.761989625	histone acetyltransferase of the MYST family 1 [Eutrema salsugineum]	-	GO:0043231//intracellular membrane-bounded organelle	GO:0046872//metal ion binding;GO:0090595//acetyl-CoA:L-lysine N6-acetyltransferase	GO:0000226//microtubule cytoskeleton organization;GO:0000904//cell morphogenesis involved in differentiation;GO:0006259//DNA metabolic process;GO:0009411//response to UV;GO:0010074//maintenance of meristem identity;GO:0010468//regulation of gene expression;GO:0042127//regulation of cell proliferation
MSTRG.24241	--	0	0.05	0	0.78	1.52	1.51	0	0	0	0	1.27	0.0167	-6.251719093	1.58E-06	3.36E-05	-4.058893689	0.674950623	0.896891069	BnaAnng30230D [Brassica napus]	-	GO:0043231//intracellular membrane-bounded organelle	-	GO:0006950//response to stress;GO:0044699//single-organism process
MSTRG.2448	--	0.48	0.32	2.24	0	0.34	0.27	0	1.04	3.71	1.5833	0.2033	1.0133	2.317190176	0.004508574	0.035995928	0.64385619	0.524366908	0.815319881	hypothetical protein HID58_028743 [Brassica napus]	-	-	-	-
MSTRG.24591	SNL5	0.79	0.6	0.89	1.73	2.19	2.66	0.02	0.09	0.04	0.05	2.1933	0.76	-1.52905376	0.000983414	0.010149876	-3.925999419	2.85E-08	7.40E-07	paired amphipathic helix protein Sin3-like 5 isoform X2 [Capsella rubella]	-	-	-	GO:0010467//gene expression
MSTRG.24666	CCB1	0.03	0	0.02	0.02	0	0.04	0.37	0.23	0.19	0.2633	0.02	0.0167	-0.263034406	0.808559079	0.97358954	3.981852653	2.61E-05	0.000337018	Reverse transcriptase RNA-dependent DNA polymerase [Arabidopsis thaliana x Arabidopsis arenosa]	-	-	-	-
MSTRG.2483	COMT2	6.17	5.77	5.75	7.25	7.59	8.15	1.39	4.09	2.48	2.6533	7.6633	5.8967	-0.378072418	0.112147519	0.401330323	-1.152093712	0.00317125	0.020161147	BnaC01g22350D [Brassica napus]	-	GO:0009536//plastid	GO:0005515//protein binding;GO:0008168//methyltransferase activity	GO:0009699//phenylpropanoid biosynthetic process
MSTRG.2486	DXS	4.46	5.8	6.36	9.54	11.33	10.08	0.58	0.97	0.94	0.83	10.3167	5.54	-0.897019027	0.025730977	0.141683099	-2.738702735	1.28E-24	3.06E-22	PREDICTED: 1-deoxy-D-xylulose-5-phosphate synthase, chloroplastic [Brassica oleracea var. oleracea] [Brassica oleracea]	ko01100//Metabolic pathways;ko01110//Biosynthesis of secondary metabolites;ko00900//Terpenoid backbone biosynthesis;ko00730//Thiamine metabolism	GO:0009532//plastid stroma	GO:0016744//transferase activity, transferring aldehyde or ketonic groups;GO:0043169//cation binding	GO:0000097//sulfur amino acid biosynthetic process;GO:0006090//pyruvate metabolic process;GO:0006355//regulation of transcription, DNA-templated;GO:0006468//protein phosphorylation;GO:0006544//glycine metabolic process;GO:0006633//fatty acid biosynthetic process;GO:0006732//coenzyme metabolic process;GO:0006753//nucleoside phosphate metabolic process;GO:0006772//thiamine metabolic process;GO:0006…
MSTRG.24972	At4g26390	0.93	0.86	0.73	2.21	2.61	1.23	0.23	0.46	0.21	0.3	2.0167	0.84	-1.263511409	0.055637997	0.250605224	-1.485426827	0.004524755	0.026956635	BnaA10g10590D [Brassica napus]	ko01100//Metabolic pathways;ko01110//Biosynthesis of secondary metabolites;ko01200//Carbon metabolism;ko01230//Biosynthesis of amino acids;ko00230//Purine metabolism;ko00010//Glycolysis / Gluconeogenesis;ko00620//Pyruvate metabolism	GO:0044444//cytoplasmic part	GO:0016301//kinase activity;GO:0031420//alkali metal ion binding;GO:0032550//purine ribonucleoside binding	GO:0006006//glucose metabolic process;GO:0006090//pyruvate metabolic process;GO:0006796//phosphate-containing compound metabolic process;GO:0006996//organelle organization;GO:0046942//carboxylic acid transport;GO:0051603//proteolysis involved in cellular protein catabolic process
MSTRG.25150	SMC4	0.4	0.58	1	2.27	4.71	3.38	0.11	0.36	0.11	0.1933	3.4533	0.66	-2.387451668	3.18E-07	7.78E-06	-1.771375625	0.017858748	0.08076614	structural maintenance of chromosomes protein 4 [Brassica rapa]	-	GO:0043231//intracellular membrane-bounded organelle;GO:0043232//intracellular non-membrane-bounded organelle	GO:0032550//purine ribonucleoside binding	GO:0000819//sister chromatid segregation;GO:0002252//immune effector process;GO:0003006//developmental process involved in reproduction;GO:0006305//DNA alkylation;GO:0006342//chromatin silencing;GO:0030422//production of siRNA involved in RNA interference;GO:0034968//histone lysine methylation;GO:0048580//regulation of post-embryonic development;GO:0051052//regulation of DNA metabolic process;GO:…
MSTRG.25151	SMC4	0.33	0.63	0.64	2.13	4.66	2.31	0.19	0.18	0	0.1233	3.0333	0.5333	-2.50779464	1.04E-06	2.29E-05	-2.112474729	0.031722405	0.125976894	structural maintenance of chromosomes protein 4-like [Brassica napus]	-	GO:0043231//intracellular membrane-bounded organelle;GO:0043232//intracellular non-membrane-bounded organelle	GO:0032550//purine ribonucleoside binding	GO:0000819//sister chromatid segregation;GO:0002252//immune effector process;GO:0003006//developmental process involved in reproduction;GO:0006305//DNA alkylation;GO:0006342//chromatin silencing;GO:0030422//production of siRNA involved in RNA interference;GO:0034968//histone lysine methylation;GO:0048580//regulation of post-embryonic development;GO:0051052//regulation of DNA metabolic process;GO:…
MSTRG.25421	BGLU3	0.79	0.82	0.73	0.29	0.23	0.44	1.65	2.46	1.88	1.9967	0.32	0.78	1.285402219	0.001487828	0.014356606	1.356047473	0.000479684	0.00415381	PREDICTED: beta-glucosidase 3-like isoform X4 [Brassica oleracea var. oleracea] [Brassica oleracea]	ko01100//Metabolic pathways;ko01110//Biosynthesis of secondary metabolites;ko00940//Phenylpropanoid biosynthesis;ko00500//Starch and sucrose metabolism;ko00460//Cyanoamino acid metabolism	GO:0043231//intracellular membrane-bounded organelle	GO:0016798//hydrolase activity, acting on glycosyl bonds	GO:0009608//response to symbiont;GO:0009812//flavonoid metabolic process
MSTRG.25453	--	1.97	2.36	2.53	1.86	3.68	3.23	0.4	0.63	0.43	0.4867	2.9233	2.2867	-0.354368266	0.418120014	0.820954972	-2.232240207	9.70E-06	0.00014068	hexokinase-1 protein [Arabidopsis thaliana]	-	GO:0043231//intracellular membrane-bounded organelle	-	GO:0043094//cellular metabolic compound salvage
MSTRG.25504	--	0.1	0.22	0.09	1.86	0.82	1.48	0	0	0	0	1.3867	0.1367	-3.342887714	0.000356799	0.004260656	-7.094517599	0.078650845	0.245452585	BnaAnng09140D [Brassica napus]	ko03420//Nucleotide excision repair;ko03440//Homologous recombination;ko03030//DNA replication;ko03430//Mismatch repair	-	-	-
MSTRG.25507	CXE7	1.26	1.97	1.64	3.6	3.26	2.33	0.7	0.68	0.85	0.7433	3.0633	1.6233	-0.916143089	0.287120182	0.690438739	-1.126878062	0.005220049	0.03035797	probable carboxylesterase 7 isoform X1 [Brassica rapa]	-	GO:0044444//cytoplasmic part	GO:0016788//hydrolase activity, acting on ester bonds	-
MSTRG.25558	RCF3	3.38	2.77	3.24	2.98	3.41	3.11	7.91	5.46	6.6	6.6567	3.1667	3.13	-0.016802356	0.001897831	0.017635091	1.08863727	2.16E-07	4.69E-06	KH domain-containing protein At4g18375 isoform X1 [Brassica rapa]	-	GO:0043231//intracellular membrane-bounded organelle	-	GO:0001101//response to acid chemical
MSTRG.25598	IDD4	2.76	4.02	2.98	5.92	8.34	7.69	0.21	1.21	0.24	0.5533	7.3167	3.2533	-1.169267887	0.003612667	0.030066229	-2.555697906	4.90E-05	0.000586291	LOW QUALITY PROTEIN: protein indeterminate-domain 4, chloroplastic [Brassica rapa]	-	GO:0009536//plastid	GO:0001071//nucleic acid binding transcription factor activity;GO:0003676//nucleic acid binding;GO:0043169//cation binding	GO:0006355//regulation of transcription, DNA-templated;GO:0006996//organelle organization;GO:0009887//organ morphogenesis;GO:0010608//posttranscriptional regulation of gene expression;GO:0048869//cellular developmental process
MSTRG.25612	IDD4	0.29	0.49	0.51	0.78	0.69	0.92	0	0.16	0.02	0.06	0.7967	0.43	-0.889639553	0.404646826	0.810410167	-2.841302254	0.004044551	0.02457147	LOW QUALITY PROTEIN: protein indeterminate-domain 4, chloroplastic [Brassica rapa]	-	GO:0009536//plastid	GO:0001071//nucleic acid binding transcription factor activity;GO:0003676//nucleic acid binding;GO:0043169//cation binding	GO:0006355//regulation of transcription, DNA-templated;GO:0006996//organelle organization;GO:0009887//organ morphogenesis;GO:0010608//posttranscriptional regulation of gene expression;GO:0048869//cellular developmental process
MSTRG.25692	FPS1	0.19	0.38	0.23	0.91	1.36	1.56	0.1	0.12	0.26	0.16	1.2767	0.2667	-2.259272487	0.000353425	0.004224791	-0.736965594	0.413580417	0.723622484	LOW QUALITY PROTEIN: farnesyl pyrophosphate synthase 2 [Brassica rapa]	ko01100//Metabolic pathways;ko01110//Biosynthesis of secondary metabolites;ko00900//Terpenoid backbone biosynthesis	GO:0043231//intracellular membrane-bounded organelle;GO:0044444//cytoplasmic part	GO:0004659//prenyltransferase activity;GO:0043169//cation binding	GO:0006575//cellular modified amino acid metabolic process;GO:0006595//polyamine metabolic process;GO:0006637//acyl-CoA metabolic process;GO:0006720//isoprenoid metabolic process;GO:0006725//cellular aromatic compound metabolic process;GO:0006873//cellular ion homeostasis;GO:0006970//response to osmotic stress;GO:0006996//organelle organization;GO:0008203//cholesterol metabolic process;GO:0008654…
MSTRG.2572	--	0.41	0.43	0.42	0.63	0.56	0.66	0.78	1.53	0.98	1.0967	0.6167	0.42	-0.554101537	0.951369411	0.994882214	1.38466385	0.001450492	0.010571844	heavy metal-associated isoprenylated plant protein 26-like [Brassica napus]	-	-	-	-
MSTRG.25778	--	0.72	1.54	1.4	3.54	4.3	4.56	0.07	0.37	0.37	0.27	4.1333	1.22	-1.760424567	0.000161682	0.002134703	-2.175849835	0.000464886	0.0040456	transcription factor VIP1-like [Brassica napus]	-	-	-	-
MSTRG.25796	GLC1	6.74	11.45	11.66	29.53	53.58	35.75	0.15	0.75	0.94	0.6133	39.62	9.95	-1.993460449	1.32E-10	6.04E-09	-4.01995326	1.67E-18	2.02E-16	PREDICTED: major pollen allergen Ole e 10-like [Brassica oleracea var. oleracea] [Brassica oleracea]	-	GO:0005911//cell-cell junction;GO:0030312//external encapsulating structure	GO:0016798//hydrolase activity, acting on glycosyl bonds	GO:0010243//response to organonitrogen compound
MSTRG.26139	DRP1C	0.03	0.12	0.06	0.48	0.51	1.15	0	0	0.03	0.01	0.7133	0.07	-3.349149564	0.001441172	0.01396725	-2.807354922	0.237083002	0.519044992	dynamin-related protein 1C [Arabidopsis lyrata subsp. lyrata] [Arabidopsis lyrata]	-	GO:0005856//cytoskeleton;GO:0005911//cell-cell junction;GO:0016020//membrane;GO:0043231//intracellular membrane-bounded organelle;GO:0044444//cytoplasmic part	GO:0017111//nucleoside-triphosphatase activity;GO:0032550//purine ribonucleoside binding	GO:0007005//mitochondrion organization;GO:0009555//pollen development;GO:0019321//pentose metabolic process;GO:0044763//single-organism cellular process
MSTRG.26296	OsI_37456	1.28	1.31	2.03	1.15	2.36	2.8	0.48	0.86	0.56	0.6333	2.1033	1.54	-0.449747154	0.661685492	0.935553595	-1.281893433	0.008902713	0.046665486	pyruvate kinase 2, cytosolic [Nicotiana attenuata]	ko01100//Metabolic pathways;ko01110//Biosynthesis of secondary metabolites;ko01200//Carbon metabolism;ko01230//Biosynthesis of amino acids;ko00230//Purine metabolism;ko00010//Glycolysis / Gluconeogenesis;ko00620//Pyruvate metabolism	-	-	-
MSTRG.2630	PLP3B	0	0.08	0.04	0.6	0.72	0.41	0	0.09	0	0.03	0.5767	0.04	-3.849665727	0.004858632	0.038218126	-0.415037499	0.904548703	0.96219229	PREDICTED: thioredoxin domain-containing protein PLP3A-like [Camelina sativa]	-	GO:0044424//intracellular part	GO:0015631//tubulin binding	GO:0006997//nucleus organization;GO:0016049//cell growth;GO:0030865//cortical cytoskeleton organization;GO:0048285//organelle fission;GO:1902410//mitotic cytokinetic process
MSTRG.26347	--	0	0.15	0.1	0	0.04	0.04	1.23	0.87	1.59	1.23	0.0267	0.0833	1.64385619	0.302637981	0.708807301	3.883620816	1.14E-05	0.000163035	unnamed protein product [Brassica oleracea]	-	-	-	-
MSTRG.26366	--	0.06	0.06	0.11	0	0.34	0.09	1.23	0.48	0.99	0.9	0.1433	0.0767	-0.902702799	0.894218403	0.994882214	3.553253641	0.000356964	0.003230114	-	-	-	-	-
MSTRG.26388	SAHH2	0.09	0	0.2	0.25	0.17	0.68	1.41	0.34	0.35	0.7	0.3667	0.0967	-1.923378718	0.23727401	0.624575585	2.856264523	0.005316317	0.030811342	adenosylhomocysteinase 2 [Brassica rapa]	ko01100//Metabolic pathways;ko00270//Cysteine and methionine metabolism	GO:0016020//membrane;GO:0043231//intracellular membrane-bounded organelle;GO:0044444//cytoplasmic part	GO:0016802//trialkylsulfonium hydrolase activity	GO:0000097//sulfur amino acid biosynthetic process;GO:0006970//response to osmotic stress;GO:0006996//organelle organization;GO:0070838//divalent metal ion transport
MSTRG.26396	TMK4	0.04	0.16	0.16	0	0.23	0.1	0	0	0	0	0.11	0.12	0.125530882	0.465987822	0.859702631	-6.906890596	0.001218532	0.00913893	receptor-like kinase TMK4 [Brassica rapa]	-	GO:0016020//membrane;GO:0044464//cell part	GO:0004672//protein kinase activity	GO:0006796//phosphate-containing compound metabolic process
MSTRG.26477	At2g44050	2.27	2.91	3.82	5.11	7.24	7.12	1.01	1.15	1	1.0533	6.49	3	-1.113255978	0.038630752	0.192333631	-1.510000443	0.000196754	0.001942661	Lumazine/riboflavin synthase superfamily [Arabidopsis thaliana x Arabidopsis arenosa]	ko01100//Metabolic pathways;ko01110//Biosynthesis of secondary metabolites;ko00740//Riboflavin metabolism	GO:0009532//plastid stroma	GO:0004175//endopeptidase activity;GO:0005488//binding;GO:0016867//intramolecular transferase activity, transferring acyl groups	GO:0006771//riboflavin metabolic process;GO:0009755//hormone-mediated signaling pathway;GO:0019941//modification-dependent protein catabolic process
MSTRG.26489	--	0.59	0.63	1.15	0.72	0.51	0.19	5.32	3.32	4.4	4.3467	0.4733	0.79	0.738996129	0.079339551	0.320641166	2.459984905	4.33E-08	1.08E-06	HR-like lesion-inducing protein [Arabidopsis thaliana]	-	-	-	-
MSTRG.26530	--	4.83	3.41	4.2	6.68	8.93	6.88	11.86	5.89	10.08	9.2767	7.4967	4.1467	-0.854297176	0.314580915	0.722086166	1.161654423	0.000138555	0.001434846	hypothetical protein HID58_025539, partial [Brassica napus]	-	-	-	-
MSTRG.26637	NDX1	1.54	1.74	2.41	4.7	5.47	5.31	1.04	0.78	1.78	1.2	5.16	1.8967	-1.443904914	0.000156967	0.002079162	-0.660431746	0.147807419	0.38021289	protein NEOXANTHIN-DEFICIENT 1 isoform X4 [Brassica rapa]	-	GO:0043231//intracellular membrane-bounded organelle	-	GO:0006779//porphyrin-containing compound biosynthetic process
MSTRG.26639	NDX1	1.67	2.76	3.8	6.49	7.43	8.02	2.26	0.66	1.22	1.38	7.3133	2.7433	-1.41459919	0.003033532	0.026094482	-0.991261663	0.101001183	0.292714623	BnaA07g08650D [Brassica napus]	-	GO:0043231//intracellular membrane-bounded organelle	-	GO:0006779//porphyrin-containing compound biosynthetic process
MSTRG.26835	LKR/SDH	4.35	4.78	4.25	9.69	13.23	12.94	1.17	3.48	2.84	2.4967	11.9533	4.46	-1.422297372	1.30E-06	2.80E-05	-0.837040492	0.060324616	0.202887219	BnaA07g09660D [Brassica napus]	-	GO:0044444//cytoplasmic part	GO:0004753//saccharopine dehydrogenase activity	GO:0003006//developmental process involved in reproduction;GO:0006554//lysine catabolic process;GO:0009628//response to abiotic stimulus;GO:0009746//response to hexose;GO:0018205//peptidyl-lysine modification;GO:0034285//response to disaccharide;GO:0042743//hydrogen peroxide metabolic process
MSTRG.26905	At2g39490	0	0	0	0	0	0	5.21	1.26	4.26	3.5767	0	0	0	1	1	11.80439995	3.64E-13	2.18E-11	BnaA07g10640D [Brassica napus]	-	-	-	-
MSTRG.26906	At2g39490	0	0	0.09	0	0	0	9.98	1.94	3.47	5.13	0	0.03	4.906890596	0.521272895	0.888851295	7.417852515	5.38E-10	1.95E-08	BnaA07g10640D [Brassica napus]	-	-	-	-
MSTRG.26927	--	1.22	1.3	1.56	1.63	2.76	3.39	0.08	0.37	0.33	0.26	2.5933	1.36	-0.931201003	0.341423498	0.749956996	-2.387023123	7.79E-05	0.000875339	vacuolar protein sorting-associated protein 35A-like [Brassica napus]	-	-	-	-
MSTRG.2695	VHA-a3	0.83	0.91	0.73	0.88	2.29	1.56	0	0.1	0.35	0.15	1.5767	0.8233	-0.937329142	0.424994583	0.827149232	-2.456514135	0.00338185	0.021254003	BnaAnng35860D, partial [Brassica napus]	-	-	-	-
MSTRG.27078	HOS15	0.07	0.19	0.19	0.06	0.6	0.45	2.2	1.15	2.8	2.05	0.37	0.15	-1.30256277	0.592096011	0.928229323	3.772589504	8.44E-07	1.60E-05	LOW QUALITY PROTEIN: WD40 repeat-containing protein HOS15 [Brassica napus]	-	GO:0031461//cullin-RING ubiquitin ligase complex;GO:0043231//intracellular membrane-bounded organelle	-	GO:0000338//protein deneddylation;GO:0006355//regulation of transcription, DNA-templated;GO:0006402//mRNA catabolic process;GO:0006950//response to stress;GO:0009639//response to red or far red light;GO:0016458//gene silencing;GO:0032446//protein modification by small protein conjugation;GO:0034968//histone lysine methylation
MSTRG.2720	--	1.3	1.99	2.62	3.59	2.16	2.74	0.03	0.13	0	0.0533	2.83	1.97	-0.522606423	0.910651395	0.994882214	-5.20701432	7.14E-12	3.51E-10	pollen receptor-like kinase 5 [Brassica napus]	-	-	-	-
MSTRG.27282	--	4.98	4.06	6.19	6.64	6.32	5.95	2.07	2.59	2.46	2.3733	6.3033	5.0767	-0.312233421	0.263015773	0.660171456	-1.096966796	0.001669604	0.011885144	-	-	-	-	-
MSTRG.2736	PTAC10	2.78	2.85	3.37	5.24	8.18	8.45	4.08	2.6	3.3	3.3267	7.29	3	-1.280956314	0.00029169	0.003576038	0.149114814	0.312401154	0.616107379	protein PLASTID TRANSCRIPTIONALLY ACTIVE 10 [Brassica rapa]	-	GO:0000229//cytoplasmic chromosome;GO:0009532//plastid stroma	GO:0003676//nucleic acid binding	GO:0006355//regulation of transcription, DNA-templated
MSTRG.27511	H2AV	0	0	0.06	0.55	1.09	0.33	0	0	0	0	0.6567	0.02	-5.037089319	0.005979672	0.045223825	-4.321928095	0.844666575	0.931138542	histone H2A variant 1 isoform X1 [Brassica napus]	-	GO:0043231//intracellular membrane-bounded organelle;GO:0043232//intracellular non-membrane-bounded organelle	GO:0003676//nucleic acid binding;GO:0046983//protein dimerization activity	-
MSTRG.27519	GATA8	0.33	0.23	0.3	1.25	1.63	1.77	0.23	0.57	0.15	0.3167	1.55	0.2867	-2.434822151	1.68E-05	0.000282331	0.143590854	0.712605841	0.915316348	GATA transcription factor 8 [Brassica rapa]	-	GO:0043231//intracellular membrane-bounded organelle	GO:0003677//DNA binding;GO:0046914//transition metal ion binding	GO:0006355//regulation of transcription, DNA-templated;GO:0044707//single-multicellular organism process;GO:0048511//rhythmic process
MSTRG.27528	--	0.19	0.25	0.22	0.56	0.38	0.21	0.63	0.72	1.05	0.8	0.3833	0.22	-0.801095932	0.728348106	0.958783741	1.862496476	0.000223029	0.002157907	BnaC02g20590D [Brassica napus]	-	-	-	GO:0006259//DNA metabolic process;GO:0034645//cellular macromolecule biosynthetic process
MSTRG.2788	--	0.37	1.02	1.53	9.22	11.05	9.39	0	0.36	0	0.12	9.8867	0.9733	-3.344478324	6.74E-12	3.70E-10	-3.019899557	0.035773725	0.137856872	BnaA06g16030D [Brassica napus]	-	-	-	-
MSTRG.28006	CLPB1	0.54	0.62	0.75	0.74	0.87	0.81	2.3	1.07	2.75	2.04	0.8067	0.6367	-0.341434409	0.385679935	0.794042359	1.679959015	1.14E-06	2.09E-05	PREDICTED: chaperone protein ClpB1-like [Brassica oleracea var. oleracea] [Brassica oleracea]	-	GO:0009526//plastid envelope;GO:0009532//plastid stroma	GO:0017111//nucleoside-triphosphatase activity;GO:0032550//purine ribonucleoside binding	GO:0000302//response to reactive oxygen species;GO:0006417//regulation of translation;GO:0009408//response to heat;GO:0009642//response to light intensity;GO:0033554//cellular response to stress
MSTRG.28035	--	0.82	0.79	1.12	2.52	2.2	2.5	0.71	0.46	0.33	0.5	2.4067	0.91	-1.403097886	0.005972582	0.045182732	-0.86393845	0.118475693	0.326465529	BnaC07g12260D [Brassica napus]	-	GO:1902562//H4 histone acetyltransferase complex	-	GO:0010468//regulation of gene expression
MSTRG.28077	RPL10A	1.54	1.57	2.06	4.3	6.15	5.68	0.76	1.02	0.93	0.9033	5.3767	1.7233	-1.641510253	3.07E-05	0.000486254	-0.931871429	0.03207097	0.127035803	PREDICTED: 60S ribosomal protein L10-1 [Brassica oleracea var. oleracea] [Brassica oleracea]	ko03010//Ribosome	GO:0009526//plastid envelope;GO:0015934//large ribosomal subunit;GO:0031090//organelle membrane	GO:0005198//structural molecule activity	GO:0009411//response to UV;GO:0009451//RNA modification;GO:0010467//gene expression
MSTRG.28086	PATL1	0.21	0.13	0.17	0.37	1.13	0.45	0	0	0	0	0.65	0.17	-1.934904972	0.047041847	0.222246469	-7.409390936	0.001473052	0.010700771	patellin-1-like [Brassica napus]	-	GO:0005576//extracellular region;GO:0005911//cell-cell junction;GO:0009536//plastid;GO:0031224//intrinsic component of membrane	GO:0019899//enzyme binding	GO:0000904//cell morphogenesis involved in differentiation;GO:0006090//pyruvate metabolic process;GO:0006970//response to osmotic stress;GO:0006996//organelle organization;GO:0010038//response to metal ion;GO:0042044//fluid transport;GO:0048588//developmental cell growth
MSTRG.28101	CYP709B1	14.52	12.63	16.82	27.85	32.92	31.21	9.09	11	13.79	11.2933	30.66	14.6567	-1.064800665	3.81E-05	0.000589293	-0.376085658	0.128953583	0.346371146	LOW QUALITY PROTEIN: cytochrome P450 709B1 [Brassica rapa]	-	-	GO:0016491//oxidoreductase activity;GO:0046906//tetrapyrrole binding;GO:0046914//transition metal ion binding	GO:0044710//single-organism metabolic process
MSTRG.28112	At5g10900	2.77	3.47	5.12	2.47	1.05	3.32	1.17	1.83	1.67	1.5567	2.28	3.7867	0.731894605	0.000912674	0.009521828	-1.28246838	0.000220209	0.00213637	PREDICTED: serine/threonine-protein phosphatase 7 inactive homolog [Raphanus sativus]	-	GO:0044424//intracellular part	GO:0003824//catalytic activity;GO:0043169//cation binding	-
MSTRG.28113	At1g71691	1.15	1.08	1.06	2.1	3.47	3.61	0.45	0.91	0.46	0.6067	3.06	1.0967	-1.48040657	0.005249656	0.040714808	-0.854149134	0.121675063	0.332504752	GDSL esterase/lipase At1g71691 [Brassica rapa]	-	-	GO:0016788//hydrolase activity, acting on ester bonds	GO:0006629//lipid metabolic process
MSTRG.2818	--	0.53	0.62	0.69	0.72	1.82	1.17	0.04	0.19	0.1	0.11	1.2367	0.6133	-1.011713421	0.417121929	0.820115341	-2.479167837	0.003408124	0.021397026	unnamed protein product, partial [Brassica oleracea]	-	-	-	-
MSTRG.2850	--	0.63	1.22	1.14	0.19	0.06	0.4	1.1	1.19	1.59	1.2933	0.2167	0.9967	2.201633861	0.000937894	0.009750143	0.375911168	0.343101801	0.652155646	LOW QUALITY PROTEIN: hypothetical protein HID58_013523 [Brassica napus]	-	-	-	-
MSTRG.28536	--	14.52	11.06	14.47	5.93	6.08	6.78	18.07	16.89	16.58	17.18	6.2633	13.35	1.091837176	3.74E-23	9.54E-21	0.363890295	0.012058863	0.059368733	Reverse transcriptase domain [Arabidopsis suecica]	-	-	-	-
MSTRG.28548	JAL22	0.08	0	0.09	0	0.04	0	0.48	0.3	0.71	0.4967	0.0133	0.0567	2.087462841	0.210544265	0.584473469	3.131705679	0.000245794	0.002347715	jacalin-related lectin 22 isoform X1 [Brassica napus]	-	GO:0005911//cell-cell junction;GO:0009536//plastid	GO:0046914//transition metal ion binding	GO:0000097//sulfur amino acid biosynthetic process;GO:0001101//response to acid chemical;GO:0006970//response to osmotic stress;GO:0006996//organelle organization;GO:0007165//signal transduction;GO:0009725//response to hormone;GO:0009791//post-embryonic development;GO:0044702//single organism reproductive process;GO:0048608//reproductive structure development;GO:0050790//regulation of catalytic a…
MSTRG.28552	XYL1	0.23	0.57	0.62	6.13	16.87	13.82	0.28	0.16	0.32	0.2533	12.2733	0.4733	-4.696526792	1.22E-15	1.16E-13	-0.901819606	0.142826566	0.371357656	alpha-xylosidase 1 [Brassica rapa]	-	GO:0005576//extracellular region;GO:0005618//cell wall;GO:0005911//cell-cell junction;GO:0009536//plastid	GO:0005488//binding;GO:0090599//alpha-glucosidase activity;GO:0097599//xylanase activity	GO:0000272//polysaccharide catabolic process;GO:0006073//cellular glucan metabolic process;GO:0010038//response to metal ion;GO:0042546//cell wall biogenesis;GO:0071555//cell wall organization
MSTRG.29116	AFP2	0.18	0.02	0.32	0	0.02	0	34.48	10.77	14.65	19.9667	0.0067	0.1733	4.700439718	0.000773023	0.008278006	6.84790057	5.71E-13	3.31E-11	PREDICTED: defensin-like protein 1 [Brassica oleracea var. oleracea] [Brassica oleracea]	ko04016//MAPK signaling pathway - plant	GO:0030312//external encapsulating structure	-	GO:0000160//phosphorelay signal transduction system;GO:0001906//cell killing;GO:0009611//response to wounding;GO:0009620//response to fungus;GO:0009685//gibberellin metabolic process;GO:0010476//gibberellin mediated signaling pathway;GO:0042742//defense response to bacterium
MSTRG.29117	ARAC5	0.34	0.31	0.43	0.48	1.18	1.35	1.69	0.8	0.81	1.1	1.0033	0.36	-1.478732175	0.147693101	0.476828905	1.611434712	0.004558344	0.027126093	rac-like GTP-binding protein ARAC5 [Brassica rapa]	ko04145//Phagosome	GO:0015630//microtubule cytoskeleton;GO:0016020//membrane;GO:0043231//intracellular membrane-bounded organelle;GO:0044444//cytoplasmic part	GO:0004620//phospholipase activity;GO:0017111//nucleoside-triphosphatase activity;GO:0019900//kinase binding;GO:0032550//purine ribonucleoside binding	GO:0000097//sulfur amino acid biosynthetic process;GO:0000904//cell morphogenesis involved in differentiation;GO:0005976//polysaccharide metabolic process;GO:0007017//microtubule-based process;GO:0008380//RNA splicing;GO:0009826//unidimensional cell growth;GO:0030036//actin cytoskeleton organization;GO:0035556//intracellular signal transduction;GO:0043479//pigment accumulation in tissues in respo…
MSTRG.2914	--	23.27	18.37	27.05	8.97	7.44	11.51	50.87	39.81	39.72	43.4667	9.3067	22.8967	1.298801143	5.27E-18	7.05E-16	0.92477188	1.35E-06	2.42E-05	BnaA03g56700D [Brassica napus]	-	-	-	-
MSTRG.29549	GRF9	0	0.03	0.16	0.45	1.26	0.49	0	0	0	0	0.7333	0.0633	-3.5334322	0.004518557	0.036055943	-5.984893108	0.471067212	0.774066045	BnaC05g48170D [Brassica napus]	-	GO:0009532//plastid stroma;GO:0016020//membrane	GO:0046872//metal ion binding;GO:0051219//phosphoprotein binding	GO:0000097//sulfur amino acid biosynthetic process;GO:0006090//pyruvate metabolic process;GO:0006970//response to osmotic stress;GO:0006996//organelle organization;GO:0008104//protein localization;GO:0009746//response to hexose;GO:0009791//post-embryonic development;GO:0010038//response to metal ion;GO:0042044//fluid transport;GO:0042743//hydrogen peroxide metabolic process;GO:0048827//phyllome d…
MSTRG.29668	--	3.9	6.59	7.64	10.62	12.88	13.27	0.5	2.07	0.81	1.1267	12.2567	6.0433	-1.020150251	0.036600601	0.184606694	-2.423283773	2.34E-06	3.96E-05	hypothetical protein IGI04_013159 [Brassica rapa subsp. trilocularis] [Brassica rapa]	-	-	-	-
MSTRG.29697	ATHB-15	1.23	1.51	1.52	2.61	3.77	3.68	0.89	0.83	0.92	0.88	3.3533	1.42	-1.23970497	0.001022599	0.010481613	-0.690315501	0.024104592	0.101845205	homeobox-leucine zipper protein ATHB-15 isoform X2 [Brassica rapa]	-	GO:0043231//intracellular membrane-bounded organelle	GO:0001071//nucleic acid binding transcription factor activity;GO:0003677//DNA binding	GO:0000904//cell morphogenesis involved in differentiation;GO:0003006//developmental process involved in reproduction;GO:0007015//actin filament organization;GO:0007059//chromosome segregation;GO:0009267//cellular response to starvation;GO:0009790//embryo development;GO:0009799//specification of symmetry;GO:0009887//organ morphogenesis;GO:0009933//meristem structural organization;GO:0009943//adax…
MSTRG.29854	CEP9	0	0.56	0.73	11.83	6.41	2.89	0	0	0	0	7.0433	0.43	-4.033849797	0.003314789	0.028073493	-8.74819285	0.022588366	0.096899877	DNA-directed RNA polymerase 3, chloroplastic-like [Brassica napus]	-	-	-	-
MSTRG.29870	At4g26390	0.45	0.86	0.66	1.49	2.13	1.1	0.07	0.14	0.07	0.0933	1.5733	0.6567	-1.26059123	0.081277409	0.325898041	-2.814696897	3.44E-05	0.000429542	BnaA10g10590D [Brassica napus]	ko01100//Metabolic pathways;ko01110//Biosynthesis of secondary metabolites;ko01200//Carbon metabolism;ko01230//Biosynthesis of amino acids;ko00230//Purine metabolism;ko00010//Glycolysis / Gluconeogenesis;ko00620//Pyruvate metabolism	GO:0044444//cytoplasmic part	GO:0016301//kinase activity;GO:0031420//alkali metal ion binding;GO:0032550//purine ribonucleoside binding	GO:0006006//glucose metabolic process;GO:0006090//pyruvate metabolic process;GO:0006796//phosphate-containing compound metabolic process;GO:0006996//organelle organization;GO:0046942//carboxylic acid transport;GO:0051603//proteolysis involved in cellular protein catabolic process
MSTRG.30066	--	0.53	0.24	0.53	0.13	0.12	0.19	3.53	3.27	3.99	3.5967	0.1467	0.4333	1.562936194	0.015110332	0.094528796	3.053111336	1.09E-12	6.11E-11	-	-	-	-	-
MSTRG.30141	--	0.23	0.22	0.17	0.21	0.04	0.04	1.27	0.78	1.08	1.0433	0.0967	0.2067	1.096215315	0.09401991	0.358047347	2.335822537	2.25E-06	3.83E-05	BnaAnng11290D [Brassica napus]	-	GO:0009536//plastid	-	GO:0003006//developmental process involved in reproduction
MSTRG.30262	OEP162	0.16	0.26	0.52	0	0.1	0.2	1.9	1.04	1.83	1.59	0.1	0.3133	1.647698256	0.037713215	0.188984008	2.343256604	1.61E-05	0.000219863	PREDICTED: outer envelope pore protein 16-2, chloroplastic isoform X1 [Raphanus sativus]	-	GO:0031355//integral component of plastid outer membrane	GO:0008320//protein transmembrane transporter activity;GO:0022829//wide pore channel activity;GO:0046943//carboxylic acid transmembrane transporter activity	GO:0015031//protein transport
MSTRG.30551	--	23.03	24.39	22.92	19.86	17.49	15.96	1.29	5.98	3.6	3.6233	17.77	23.4467	0.399939153	1.06E-08	3.48E-07	-2.693993395	7.91E-10	2.80E-08	unnamed protein product, partial [Brassica rapa]	-	-	-	-
MSTRG.30590	--	0.31	0.49	0.33	1.45	4.16	2.59	0.16	0.38	0.16	0.2333	2.7333	0.3767	-2.859301137	3.50E-09	1.26E-07	-0.690895945	0.353303597	0.662880091	Harbinger transposase-derived protein [Arabidopsis thaliana x Arabidopsis arenosa]	-	-	-	-
MSTRG.30733	--	1.06	1.48	1.95	2.5	5.54	5.96	0.07	0.16	0.07	0.1	4.6667	1.4967	-1.640639477	0.007472668	0.054225374	-3.903681039	4.98E-06	7.75E-05	hypothetical protein IGI04_036652 [Brassica rapa subsp. trilocularis] [Brassica rapa]	-	-	-	-
MSTRG.30738	--	0.43	1.06	0.88	1.07	2.27	2.68	0.07	0.07	0.09	0.0767	2.0067	0.79	-1.344876428	0.112323856	0.401667573	-3.365181293	6.00E-05	0.000699869	hypothetical protein IGI04_040399 [Brassica rapa subsp. trilocularis] [Brassica rapa]	-	-	-	-
MSTRG.30740	--	0	0.25	0.43	1.17	1.84	2.62	0.43	0.06	0.19	0.2267	1.8767	0.2267	-3.049528271	0.001439172	0.013951253	0	0.985886334	0.992597185	hypothetical protein IGI04_042624, partial [Brassica rapa subsp. trilocularis] [Brassica rapa]	-	-	-	-
MSTRG.30748	--	0.27	0.32	0.14	0.19	0.37	0.45	1.36	0.61	0.59	0.8533	0.3367	0.2433	-0.468386924	0.826176397	0.97358954	1.810175441	0.00646564	0.036027797	BnaC08g08020D [Brassica napus]	-	-	-	-
MSTRG.30797	RPN2	3.42	2.1	3.46	0.81	1.38	1.37	0.32	1.63	1.34	1.0967	1.1867	2.9933	1.334838204	9.13E-12	4.92E-10	-1.448627861	0.006848673	0.037729241	dolichyl-diphosphooligosaccharide--protein glycosyltransferase subunit 2-like [Brassica napus]	ko01100//Metabolic pathways;ko04141//Protein processing in endoplasmic reticulum;ko00510//N-Glycan biosynthesis	GO:0005618//cell wall;GO:0005911//cell-cell junction;GO:0031090//organelle membrane;GO:0031224//intrinsic component of membrane;GO:0043231//intracellular membrane-bounded organelle	GO:0016757//transferase activity, transferring glycosyl groups	GO:0006487//protein N-linked glycosylation;GO:0006950//response to stress;GO:0016072//rRNA metabolic process;GO:0030243//cellulose metabolic process
MSTRG.30828	BGLU3	5.76	3.93	4.45	0.69	0.06	0.24	5.48	6.61	6.78	6.29	0.33	4.7133	3.836209785	1.74E-06	3.64E-05	0.416312303	0.024487014	0.103038279	beta-glucosidase 3 isoform X1 [Brassica rapa]	ko01100//Metabolic pathways;ko01110//Biosynthesis of secondary metabolites;ko00940//Phenylpropanoid biosynthesis;ko00500//Starch and sucrose metabolism;ko00460//Cyanoamino acid metabolism	GO:0043231//intracellular membrane-bounded organelle	GO:0016798//hydrolase activity, acting on glycosyl bonds	GO:0009608//response to symbiont;GO:0009812//flavonoid metabolic process
MSTRG.30958	MCD1	0.37	0.67	0.66	2.17	1.9	3.44	0.47	0.8	1.22	0.83	2.5033	0.5667	-2.143278161	0.000147088	0.001965234	0.550610996	0.22254947	0.498069214	PREDICTED: mRNA turnover protein 4 homolog [Brassica oleracea var. oleracea] [Brassica oleracea]	-	GO:0005840//ribosome;GO:0009528//plastid inner membrane	-	GO:0009658//chloroplast organization
MSTRG.30977	REM17	4.89	4.46	5.35	4.95	5.59	6.19	0.78	1.67	1.02	1.1567	5.5767	4.9	-0.18662129	0.011415188	0.075681445	-2.082808587	6.51E-10	2.33E-08	BnaA08g12400D [Brassica napus]	-	-	-	-
MSTRG.30990	--	3	2.33	2.82	12.33	8.02	8.85	0.55	0.43	0.19	0.39	9.7333	2.7167	-1.841096405	4.80E-08	1.39E-06	-2.80029153	3.41E-12	1.76E-10	BnaA07g03900D [Brassica napus]	-	-	-	-
MSTRG.31109	At1g29470	0.42	0.32	0.36	1.24	1.91	2.02	0	0.4	0.18	0.1933	1.7233	0.3667	-2.232660757	0.002605978	0.022958977	-0.923378718	0.544068206	0.828150366	probable methyltransferase PMT24 [Brassica napus]	-	-	-	-
MSTRG.31164	PXG1	19.73	16.92	19.57	2.06	0.09	0.59	17.03	21.83	23.16	20.6733	0.9133	18.74	4.358835655	4.06E-06	7.88E-05	0.141650072	0.188762382	0.447608854	PREDICTED: peroxygenase 1 [Brassica oleracea var. oleracea] [Brassica oleracea]	ko00073//Cutin, suberine and wax biosynthesis	GO:0009532//plastid stroma;GO:0031224//intrinsic component of membrane;GO:0043232//intracellular non-membrane-bounded organelle	GO:0004497//monooxygenase activity;GO:0008374//O-acyltransferase activity;GO:0016684//oxidoreductase activity, acting on peroxide as acceptor;GO:0016705//oxidoreductase activity, acting on paired donors, with incorporation or reduction of molecular oxygen;GO:0046872//metal ion binding	GO:0001101//response to acid chemical;GO:0006090//pyruvate metabolic process;GO:0006633//fatty acid biosynthetic process;GO:0006779//porphyrin-containing compound biosynthetic process;GO:0006996//organelle organization;GO:0009409//response to cold;GO:0009639//response to red or far red light;GO:0009756//carbohydrate mediated signaling;GO:0009793//embryo development ending in seed dormancy;GO:0016…
MSTRG.31165	PXG1	10.84	9.61	14.44	1.89	0	0.57	10.54	12.34	10.02	10.9667	0.82	11.63	3.826083377	0.002404793	0.021497865	-0.084726014	0.89786479	0.95972959	PREDICTED: peroxygenase 1-like [Raphanus sativus]	ko00073//Cutin, suberine and wax biosynthesis	GO:0009532//plastid stroma;GO:0031224//intrinsic component of membrane;GO:0043232//intracellular non-membrane-bounded organelle	GO:0004497//monooxygenase activity;GO:0008374//O-acyltransferase activity;GO:0016684//oxidoreductase activity, acting on peroxide as acceptor;GO:0016705//oxidoreductase activity, acting on paired donors, with incorporation or reduction of molecular oxygen;GO:0046872//metal ion binding	GO:0001101//response to acid chemical;GO:0006090//pyruvate metabolic process;GO:0006633//fatty acid biosynthetic process;GO:0006779//porphyrin-containing compound biosynthetic process;GO:0006996//organelle organization;GO:0009409//response to cold;GO:0009639//response to red or far red light;GO:0009756//carbohydrate mediated signaling;GO:0009793//embryo development ending in seed dormancy;GO:0016…
MSTRG.31232	HSP70-6	3.96	3.13	5.12	7.3	11.59	8.88	5.23	3.58	5.28	4.6967	9.2567	4.07	-1.185463977	0.00187359	0.017437556	0.206608411	0.192411918	0.453516163	heat shock 70 kDa protein 6, chloroplastic [Brassica rapa]	ko04141//Protein processing in endoplasmic reticulum;ko03040//Spliceosome;ko04144//Endocytosis	GO:0009526//plastid envelope;GO:0009532//plastid stroma	GO:0005515//protein binding;GO:0016628//oxidoreductase activity, acting on the CH-CH group of donors, NAD or NADP as acceptor;GO:0032550//purine ribonucleoside binding	GO:0003006//developmental process involved in reproduction;GO:0006605//protein targeting;GO:0006950//response to stress;GO:0009657//plastid organization;GO:0010038//response to metal ion;GO:0044267//cellular protein metabolic process;GO:0044403//symbiosis, encompassing mutualism through parasitism;GO:0044710//single-organism metabolic process
MSTRG.31258	--	26.69	36.4	42.44	47.11	64.48	60.56	2.45	4.82	2.63	3.3	57.3833	35.1767	-0.706012995	0.454458372	0.85131374	-3.41408085	1.85E-27	5.96E-25	transmembrane protein [Arabidopsis thaliana]	-	-	-	-
MSTRG.31305	--	7.24	12.97	13.04	23.77	43.04	31.97	0.21	0.97	1.59	0.9233	32.9267	11.0833	-1.570864628	7.03E-05	0.001017755	-3.585396459	1.03E-11	4.95E-10	unnamed protein product [Brassica rapa]	-	-	-	-
MSTRG.31362	BLH2	3.22	3.23	4.39	4.39	6.12	7.67	0.82	1.65	2.13	1.5333	6.06	3.6133	-0.745987443	0.469161731	0.862201613	-1.23665899	0.000556031	0.004703691	LOW QUALITY PROTEIN: BEL1-like homeodomain protein 2 [Brassica napus]	-	GO:0043231//intracellular membrane-bounded organelle	GO:0001071//nucleic acid binding transcription factor activity;GO:0003676//nucleic acid binding	GO:0009887//organ morphogenesis;GO:0010467//gene expression;GO:0034645//cellular macromolecule biosynthetic process
MSTRG.31390	--	1.04	1.54	0.49	5.53	3.77	3.59	6.24	3.82	2.99	4.35	4.2967	1.0233	-2.069941703	0.004645401	0.036852524	2.087739246	5.80E-05	0.00067968	hypothetical protein DY000_02061519 [Brassica cretica]	-	-	-	-
MSTRG.31405	At4g38062	0.08	0.11	0.03	0.37	1.22	0.93	0	0.08	0	0.0267	0.84	0.0733	-3.517848305	0.000243102	0.003049378	-1.459431619	0.512937783	0.806447139	basic helix loop helix (bHLH) DNA-binding superfamily protein [Arabidopsis thaliana]	-	-	-	GO:0010467//gene expression;GO:0034645//cellular macromolecule biosynthetic process
MSTRG.31695	--	1.13	1.59	2.07	2.11	4.57	4.08	0.35	0.43	0.29	0.3567	3.5867	1.5967	-1.167580517	0.141092615	0.464179845	-2.162414859	0.000368072	0.003313566	PREDICTED: two pore calcium channel protein 1 [Brassica oleracea var. oleracea] [Brassica oleracea]	-	-	-	-
MSTRG.31879	--	0.66	0.78	0.97	1.22	0.96	1.14	0.16	0.14	0.3	0.2	1.1067	0.8033	-0.462150095	0.766446666	0.971121955	-2.005998741	0.002859652	0.018540854	unnamed protein product [Brassica napus]	-	-	-	-
MSTRG.31919	--	0.87	1.52	0.97	8.26	10.52	8.47	0.39	0.77	0.96	0.7067	9.0833	1.12	-3.019723092	2.41E-23	6.36E-21	-0.664396968	0.227153503	0.504787689	BnaCnng61760D, partial [Brassica napus]	-	GO:0043231//intracellular membrane-bounded organelle	-	GO:0001101//response to acid chemical;GO:0032787//monocarboxylic acid metabolic process
MSTRG.32007	--	0	0.08	0.07	0	0	0	1.27	0.61	0.67	0.85	0	0.05	5.64385619	0.110558323	0.397680169	4.087462841	9.99E-07	1.86E-05	BnaC08g19610D [Brassica napus]	-	-	-	GO:0009408//response to heat
MSTRG.32179	DCUN1D4	2.06	2.65	2.03	2.53	1.75	1.99	0.53	1.22	0.78	0.8433	2.09	2.2467	0.104283148	0.037782186	0.189221714	-1.413611206	0.002881386	0.018651182	PREDICTED: DCN1-like protein 4 isoform X2 [Brassica oleracea var. oleracea] [Brassica oleracea]	-	-	-	-
MSTRG.32278	CYP71B2	34.41	37.96	33.93	61.46	63.37	64.1	4.62	20.32	12	12.3133	62.9767	35.4333	-0.829710207	0.04452551	0.213190654	-1.524885825	0.000539611	0.004587365	cytochrome P450 71B2 isoform X1 [Brassica rapa]	-	-	-	-
MSTRG.32279	CYP71B2	1.43	2.13	1.09	3.56	5.35	4.22	0.33	0.8	0.15	0.4267	4.3767	1.55	-1.497564295	0.00278934	0.02432307	-1.861086906	0.005192919	0.030235763	cytochrome P450 71B2 isoform X1 [Brassica rapa]	-	-	-	-
MSTRG.32364	--	0.42	0.15	0.3	0	0	0	0	0	0	0	0	0.29	8.17990909	0.005484023	0.042204549	-8.17990909	0.041563408	0.153978136	-	-	-	-	-
MSTRG.3251	--	7.71	8.82	12.37	15.6	18.71	22.6	3.25	4.82	3.99	4.02	18.97	9.6333	-0.977612687	0.020205069	0.118189259	-1.260839585	1.16E-06	2.12E-05	Harbinger transposase-derived protein [Arabidopsis suecica]	-	-	-	-
MSTRG.3256	BGLU19	11.99	9.96	10.93	0.67	0.12	0.38	753.78	332.34	337.19	474.4367	0.39	10.96	4.812629864	6.90E-16	6.79E-14	5.435895809	5.26E-63	1.81E-59	beta-glucosidase 19 isoform X1 [Brassica napus]	ko01100//Metabolic pathways;ko01110//Biosynthesis of secondary metabolites;ko00940//Phenylpropanoid biosynthesis;ko00500//Starch and sucrose metabolism;ko00460//Cyanoamino acid metabolism	GO:0005911//cell-cell junction;GO:0009526//plastid envelope;GO:0042579//microbody;GO:0044432//endoplasmic reticulum part	GO:0005543//phospholipid binding;GO:0008422//beta-glucosidase activity;GO:0016791//phosphatase activity;GO:0019899//enzyme binding;GO:0046914//transition metal ion binding;GO:0046983//protein dimerization activity	GO:0000003//reproduction;GO:0006091//generation of precursor metabolites and energy;GO:0006470//protein dephosphorylation;GO:0006568//tryptophan metabolic process;GO:0006605//protein targeting;GO:0006714//sesquiterpenoid metabolic process;GO:0006873//cellular ion homeostasis;GO:0006996//organelle organization;GO:0009267//cellular response to starvation;GO:0009409//response to cold;GO:0009608//res…
MSTRG.32829	--	1.15	1.45	1.05	1.97	3.7	1.75	0.06	0	0.1	0.0533	2.4733	1.2167	-1.023522723	0.352641855	0.761441857	-4.511752654	3.40E-05	0.000426019	hypothetical protein Bca52824_039555 [Brassica carinata]	-	-	-	-
MSTRG.32913	PIP1.4	30.21	39.54	43.32	54.95	65.88	60.12	5.61	8.71	7.41	7.2433	60.3167	37.69	-0.678374907	0.464893345	0.858618092	-2.379456121	4.49E-26	1.26E-23	aquaporin PIP1-3 isoform X2 [Brassica napus]	-	-	-	-
MSTRG.33185	DGK7	6.58	6.55	4.1	10.33	7.85	5.21	1.77	2.47	3.04	2.4267	7.7967	5.7433	-0.44096916	0.650669734	0.932788184	-1.242912346	0.000743397	0.00600849	PREDICTED: diacylglycerol kinase 7 [Camelina sativa]	ko01100//Metabolic pathways;ko01110//Biosynthesis of secondary metabolites;ko00564//Glycerophospholipid metabolism;ko00561//Glycerolipid metabolism;ko04070//Phosphatidylinositol signaling system	-	-	-
MSTRG.33292	--	3.29	7.71	9.39	15.82	30.54	23.97	0.45	0.31	0.57	0.4433	23.4433	6.7967	-1.786278442	0.000258796	0.003216123	-3.938363625	1.02E-09	3.54E-08	Defensin-like (DEFL) family protein [Arabidopsis thaliana]	-	-	-	-
MSTRG.33299	CHX20	0.09	0.03	0.2	0.05	0.2	0.05	5.46	0.84	2.42	2.9067	0.1	0.1067	0.093109404	0.542290245	0.901916104	4.768184325	8.58E-10	3.02E-08	cation/H(+) antiporter 20 isoform X1 [Brassica rapa]	-	GO:0009536//plastid;GO:0031224//intrinsic component of membrane	GO:0005451//monovalent cation:proton antiporter activity	GO:0006605//protein targeting;GO:0006814//sodium ion transport;GO:0006875//cellular metal ion homeostasis;GO:0015992//proton transport;GO:0055067//monovalent inorganic cation homeostasis
MSTRG.33300	CHX20	0.13	0.06	0.2	0	0.03	0.09	7.34	1.1	3.07	3.8367	0.04	0.13	1.700439718	0.094413839	0.359063013	4.883269899	1.57E-11	7.26E-10	cation/H(+) antiporter 20 [Eutrema salsugineum]	-	GO:0009536//plastid;GO:0031224//intrinsic component of membrane	GO:0005451//monovalent cation:proton antiporter activity	GO:0006605//protein targeting;GO:0006814//sodium ion transport;GO:0006875//cellular metal ion homeostasis;GO:0015992//proton transport;GO:0055067//monovalent inorganic cation homeostasis
MSTRG.33344	--	34.48	45.37	27.1	40.95	60.75	51.53	0.53	3.06	0.99	1.5267	51.0767	35.65	-0.518762299	0.618431333	0.932788184	-4.545445074	2.26E-19	3.06E-17	unnamed protein product [Brassica napus]	-	-	-	-
MSTRG.33439	--	0.06	0	0	0.96	0.53	0.31	0	0	0.16	0.0533	0.6	0.02	-4.906890596	0.00565255	0.043237254	1.415037499	0.689715326	0.90410747	BnaA05g09780D [Brassica napus]	-	-	-	-
MSTRG.33770	--	0.15	0.26	0.05	0.16	0	0.22	2.55	0.83	0.96	1.4467	0.1267	0.1533	0.275634443	0.555033866	0.910610556	3.237989276	0.000191364	0.001896538	glycine-rich cell wall structural protein 2 [Eutrema salsugineum]	-	-	-	-
MSTRG.33792	At1g29470	1.9	1.77	2.61	3.56	6.42	5.18	0.5	0.68	0.79	0.6567	5.0533	2.0933	-1.271433289	0.008588205	0.060569604	-1.672568929	1.60E-05	0.000219308	BnaA09g54540D [Brassica napus]	-	-	-	-
MSTRG.33806	ACS10	2.02	2.42	2.46	6.89	10.39	7.77	0.69	0.92	0.43	0.68	8.35	2.3	-1.860142336	3.79E-12	2.16E-10	-1.75802721	8.14E-06	0.000120426	probable aminotransferase ACS10 [Brassica rapa]	-	-	GO:0008483//transaminase activity;GO:0016846//carbon-sulfur lyase activity;GO:0043168//anion binding	GO:0006520//cellular amino acid metabolic process;GO:0009692//ethylene metabolic process
MSTRG.33874	--	1.48	5.34	4.25	19.43	24.79	20.31	0.16	0.15	0.07	0.1267	21.51	3.69	-2.543314803	3.41E-09	1.23E-07	-4.864511993	2.97E-08	7.68E-07	Reverse transcriptase RNA-dependent DNA polymerase [Arabidopsis suecica]	-	-	-	-
MSTRG.33875	--	0.26	0.42	0.9	1.76	3.46	2.21	0.09	0.09	0.05	0.0767	2.4767	0.5267	-2.233437652	0.000172818	0.00226384	-2.780218792	0.002164303	0.014754607	BnaC08g09510D [Brassica napus]	-	-	-	-
MSTRG.3396	--	8.92	14.85	17.66	15.76	22.79	17.06	1.3	2.54	4.12	2.6533	18.5367	13.81	-0.424668517	0.414127978	0.817482294	-2.379835484	1.12E-09	3.87E-08	BnaA01g27700D [Brassica napus]	-	-	-	-
MSTRG.34057	--	41.03	58.54	80.72	67.34	101.88	87.72	12.26	15.6	15.55	14.47	85.6467	60.0967	-0.511112126	0.648459222	0.932788184	-2.05422005	1.37E-15	1.14E-13	BnaC09g13850D [Brassica napus]	-	-	-	-
MSTRG.34099	LHCA3	0.35	0.85	0.5	1.44	1.61	1.75	0	0.04	0.07	0.0367	1.6	0.5667	-1.497499659	0.043993583	0.211172294	-3.949959318	0.00051419	0.00440153	BnaA03g60230D [Brassica napus]	ko00196//Photosynthesis - antenna proteins	GO:0009521//photosystem;GO:0031224//intrinsic component of membrane;GO:0031976//plastid thylakoid;GO:0044434//chloroplast part	GO:0043169//cation binding;GO:0046906//tetrapyrrole binding	GO:0000097//sulfur amino acid biosynthetic process;GO:0006091//generation of precursor metabolites and energy;GO:0006464//cellular protein modification process;GO:0009725//response to hormone
MSTRG.34266	At1g54445	1.56	1.23	0.92	2.97	4.07	2.17	0	0	0	0	3.07	1.2367	-1.311781969	0.192325203	0.556496095	-10.27224097	0.0001079	0.001158178	BnaC06g10140D [Brassica napus]	-	-	-	-
MSTRG.34356	--	14.47	12.52	13.23	6.08	3	4.27	38.56	27.33	30.36	32.0833	4.45	13.4067	1.59107334	8.76E-14	6.27E-12	1.258873459	3.20E-10	1.21E-08	unnamed protein product [Brassica napus]	-	-	-	-
MSTRG.34363	SAE1A	0.09	0	0	0	0	0	1.27	0.94	0.81	1.0067	0	0.03	4.906890596	0.652519442	0.932788184	5.068479738	0.000319288	0.002937252	PREDICTED: SUMO-activating enzyme subunit 1A-like [Raphanus sativus]	ko04120//Ubiquitin mediated proteolysis	-	-	-
MSTRG.34364	SAE1A	0	0	0	0	0	0	0.49	0.58	0.44	0.5033	0	0	0	1	1	8.975370333	0.000184165	0.001833931	BnaAnng25940D, partial [Brassica napus]	ko04120//Ubiquitin mediated proteolysis	-	-	-
MSTRG.34371	NEK3	0.52	0.45	0.62	0.6	1.12	1.31	0.03	0.23	0.12	0.1267	1.01	0.53	-0.930291028	0.374629092	0.782920953	-2.064955442	0.00236647	0.015883648	BnaC07g49440D [Brassica napus]	-	-	-	-
MSTRG.34534	--	1.82	1.62	2.24	3.86	4.38	4.98	0.27	0.43	0.28	0.3267	4.4067	1.8933	-1.218759342	0.046378948	0.219875542	-2.535037275	4.49E-05	0.000542924	BnaAnng02060D [Brassica napus]	-	-	-	-
MSTRG.34716	SCL30A	1.17	1.26	0.71	0.33	0.41	0.7	4.43	1.8	2.64	2.9567	0.48	1.0467	1.124695747	0.005738888	0.0437627	1.498169545	0.002374633	0.015928971	PREDICTED: serine/arginine-rich SC35-like splicing factor SCL33 isoform X1 [Brassica oleracea var. oleracea] [Brassica oleracea]	ko03040//Spliceosome	GO:0016604//nuclear body;GO:0044444//cytoplasmic part	GO:0097159//organic cyclic compound binding	GO:0000377//RNA splicing, via transesterification reactions with bulged adenosine as nucleophile;GO:0006355//regulation of transcription, DNA-templated;GO:0006464//cellular protein modification process;GO:0070918//production of small RNA involved in gene silencing by RNA
MSTRG.3474	TDR	1.09	1.58	1.11	2.94	2.73	2.49	0.07	0.6	0.32	0.33	2.72	1.26	-1.110182918	0.028737862	0.154083136	-1.932885804	0.001882978	0.013143785	leucine-rich repeat receptor-like protein kinase TDR [Brassica rapa]	-	GO:0031224//intrinsic component of membrane	GO:0004672//protein kinase activity;GO:0016491//oxidoreductase activity;GO:0032550//purine ribonucleoside binding	GO:0001763//morphogenesis of a branching structure;GO:0006464//cellular protein modification process;GO:0006796//phosphate-containing compound metabolic process;GO:0009799//specification of symmetry;GO:0009933//meristem structural organization;GO:0009943//adaxial/abaxial axis specification;GO:0010065//primary meristem tissue development;GO:0010087//phloem or xylem histogenesis;GO:0044763//single-…
MSTRG.34747	HSL1	1.35	1.72	1.89	3.97	5.71	6.42	0.39	0.58	0.42	0.4633	5.3667	1.6533	-1.698648663	1.14E-08	3.69E-07	-1.835255238	2.14E-08	5.72E-07	receptor-like protein kinase HSL1 [Brassica rapa]	-	GO:0044464//cell part	GO:0004672//protein kinase activity;GO:0036094//small molecule binding;GO:0097159//organic cyclic compound binding;GO:1901363//heterocyclic compound binding	GO:0000226//microtubule cytoskeleton organization;GO:0005976//polysaccharide metabolic process;GO:0006355//regulation of transcription, DNA-templated;GO:0006468//protein phosphorylation;GO:0007059//chromosome segregation;GO:0007165//signal transduction;GO:0009606//tropism;GO:0009793//embryo development ending in seed dormancy;GO:0009826//unidimensional cell growth;GO:0010029//regulation of seed g…
MSTRG.3475	TDR	0.19	0.84	0.83	1.14	1.43	0.78	0.11	0.12	0.21	0.1467	1.1167	0.62	-0.848858474	0.61120204	0.932788184	-2.079727192	0.003422097	0.021460896	LOW QUALITY PROTEIN: leucine-rich repeat receptor-like protein kinase TDR [Brassica napus]	-	GO:0016020//membrane	GO:0004672//protein kinase activity;GO:0032550//purine ribonucleoside binding	GO:0001763//morphogenesis of a branching structure;GO:0006464//cellular protein modification process;GO:0006796//phosphate-containing compound metabolic process;GO:0009799//specification of symmetry;GO:0009933//meristem structural organization;GO:0009943//adaxial/abaxial axis specification;GO:0010065//primary meristem tissue development;GO:0010087//phloem or xylem histogenesis;GO:0044763//single-…
MSTRG.34833	MYB101	1.5	2.22	1.76	4.85	6.27	7.05	0.45	0.97	0.94	0.7867	6.0567	1.8267	-1.729310621	4.80E-07	1.13E-05	-1.215389034	0.004228299	0.025474686	BnaA04g18810D [Brassica napus]	ko04626//Plant-pathogen interaction	GO:0042995//cell projection;GO:0043231//intracellular membrane-bounded organelle	GO:0001071//nucleic acid binding transcription factor activity;GO:0003676//nucleic acid binding	GO:0006355//regulation of transcription, DNA-templated;GO:0009685//gibberellin metabolic process;GO:0009787//regulation of abscisic acid-activated signaling pathway;GO:0010476//gibberellin mediated signaling pathway;GO:0012501//programmed cell death;GO:0048229//gametophyte development
MSTRG.34839	CSLB3	2.1	1.15	1.97	0.9	1.72	1.62	3.98	3.43	5.42	4.2767	1.4133	1.74	0.299985542	0.003044587	0.026164139	1.297399459	1.29E-06	2.33E-05	cellulose synthase-like protein B3 isoform X1 [Brassica rapa]	-	GO:0031224//intrinsic component of membrane;GO:0043231//intracellular membrane-bounded organelle	GO:0016759//cellulose synthase activity	GO:0030243//cellulose metabolic process;GO:0045229//external encapsulating structure organization
MSTRG.34883	At3g59000	1.03	0.9	0.45	2.11	2.2	3.05	0	0.21	0.11	0.1067	2.4533	0.7933	-1.628744193	0.00680292	0.050265578	-2.894817763	0.00067517	0.005541144	F-box protein At3g59000-like [Brassica napus]	-	-	-	GO:0009791//post-embryonic development;GO:0050896//response to stimulus
MSTRG.34996	RPS12A	0.64	0.97	0.73	1.84	2.63	2.56	0.65	0.55	0.28	0.4933	2.3433	0.78	-1.587016159	0.002134288	0.019450274	-0.660911354	0.295136115	0.595076364	40S ribosomal protein S12-1 [Brassica rapa]	ko03010//Ribosome	GO:0005794//Golgi apparatus;GO:0015935//small ribosomal subunit	GO:0022892//substrate-specific transporter activity	GO:0006970//response to osmotic stress;GO:0010038//response to metal ion;GO:0010467//gene expression;GO:0015031//protein transport;GO:0048193//Golgi vesicle transport
MSTRG.35063	At5g46871	55.88	73.94	83.26	109.82	161.87	159.18	0	1.29	0.22	0.5033	143.6233	71.0267	-1.015857466	0.003402164	0.028679936	-7.140702826	1.34E-08	3.75E-07	BnaA08g04760D [Brassica napus]	-	-	-	GO:0001906//cell killing;GO:0009620//response to fungus
MSTRG.35132	ALA9	5.97	5.79	5.78	7.87	7.62	8.76	0.43	1.79	0.82	1.0133	8.0833	5.8467	-0.467336	0.50393296	0.881527384	-2.528505519	1.03E-07	2.41E-06	HAD-like superfamily [Arabidopsis thaliana x Arabidopsis arenosa]	-	GO:0009526//plastid envelope;GO:0016020//membrane	GO:0042625//ATPase coupled ion transmembrane transporter activity;GO:0046872//metal ion binding	GO:0015914//phospholipid transport
MSTRG.35156	--	0.7	0.93	0.73	0.58	1.51	0.9	0	0.15	0.09	0.08	0.9967	0.7867	-0.341358625	0.586508194	0.926008404	-3.297680549	0.000962518	0.007473263	BnaC09g22460D [Brassica napus]	-	-	-	-
MSTRG.35167	--	2.68	2.47	2.3	1.04	1.21	1.1	9.26	5.27	6.3	6.9433	1.1167	2.4833	1.15307933	8.70E-07	1.94E-05	1.483350509	1.28E-06	2.31E-05	hypothetical protein F2Q69_00057623 [Brassica cretica]	-	-	-	-
MSTRG.35198	At3g49725	0.73	0.39	0.93	2.13	2.29	1.4	2.07	1.78	3.21	2.3533	1.94	0.6833	-1.505395243	0.166832777	0.512787759	1.784044274	0.00309056	0.019757752	pentatricopeptide repeat-containing protein At3g49730-like [Brassica napus]	-	GO:0009536//plastid	GO:0043167//ion binding	-
MSTRG.35206	RE2	0.47	0.76	1.7	0.69	1.1	1.06	0.09	0.14	0.17	0.1333	0.95	0.9767	0.039938745	0.122716204	0.425423798	-2.87282876	3.61E-06	5.83E-05	01P13-1 [Brassica rapa subsp. pekinensis] [Brassica rapa]	-	-	-	-
MSTRG.35344	TPK3	0.21	0.12	0.14	0.17	0.23	0.06	3.07	1.68	2.2	2.3167	0.1533	0.1567	0.031026896	0.455008145	0.851895153	3.886280316	2.40E-15	1.94E-13	two-pore potassium channel 3 [Brassica rapa]	-	-	-	-
MSTRG.35403	PRS2	0.49	0.49	0.39	0.29	0.38	0.52	2.13	0.79	1.46	1.46	0.3967	0.4567	0.20321432	0.059946197	0.263735901	1.676754977	4.29E-05	0.000522021	PREDICTED: ribose-phosphate pyrophosphokinase 2, chloroplastic [Brassica oleracea var. oleracea] [Brassica oleracea]	ko01100//Metabolic pathways;ko01110//Biosynthesis of secondary metabolites;ko01200//Carbon metabolism;ko01230//Biosynthesis of amino acids;ko00230//Purine metabolism;ko00030//Pentose phosphate pathway	GO:0009536//plastid	GO:0016778//diphosphotransferase activity;GO:0032550//purine ribonucleoside binding;GO:0046872//metal ion binding	GO:0006464//cellular protein modification process;GO:0006779//porphyrin-containing compound biosynthetic process;GO:0009117//nucleotide metabolic process;GO:0009124//nucleoside monophosphate biosynthetic process
MSTRG.35491	CPK17	0.87	1.27	1.73	2.26	3.17	3.4	0.04	0.21	0.23	0.16	2.9433	1.29	-1.190079872	0.05721482	0.25547349	-3.011227255	2.08E-05	0.000275322	BnaAnng37190D, partial [Brassica napus]	-	-	-	-
MSTRG.35515	--	1.44	0.97	1.21	0.49	0.59	0.55	0.94	1.43	1.49	1.2867	0.5433	1.2067	1.151117733	6.17E-08	1.75E-06	0.09261115	0.566482096	0.844502847	BnaC07g06740D [Brassica napus]	-	-	-	-
MSTRG.35536	YUC10	8.23	7.28	6.41	8.62	11.16	12.36	0.88	1.98	0.96	1.2733	10.7133	7.3067	-0.552122131	0.045678579	0.217396007	-2.520603255	1.14E-13	7.30E-12	probable indole-3-pyruvate monooxygenase YUCCA10 [Brassica rapa]	ko01100//Metabolic pathways;ko00380//Tryptophan metabolism	-	GO:0000166//nucleotide binding;GO:0016709//oxidoreductase activity, acting on paired donors, with incorporation or reduction of molecular oxygen, NAD(P)H as one donor, and incorporation of one atom of oxygen	GO:0009653//anatomical structure morphogenesis;GO:0009850//auxin metabolic process;GO:0042743//hydrogen peroxide metabolic process;GO:0044710//single-organism metabolic process
MSTRG.35537	--	0.94	1.02	1.88	2.24	4.18	3.78	0.09	0.06	0.34	0.1633	3.4	1.28	-1.409390936	0.026850127	0.146397676	-2.970252657	2.73E-05	0.000350879	-	-	-	-	-
MSTRG.35631	--	1.11	0.81	0.71	0.14	0.31	0.12	0.35	0.33	0.6	0.4267	0.19	0.8767	2.206028975	7.73E-05	0.001108349	-1.038918989	0.142938475	0.37155547	hypothetical protein BRARA_I02820 [Brassica rapa]	-	-	-	-
MSTRG.35710	--	0.93	1.4	0.95	2.06	2.31	2	0.32	0.32	0.34	0.3267	2.1233	1.0933	-0.957597558	0.249021395	0.641518815	-1.742842161	0.00053722	0.004569486	BnaC03g59940D [Brassica napus]	-	-	-	-
MSTRG.35711	--	0.62	0.88	0.87	1.43	2.73	1.14	0.2	0.18	0.1	0.16	1.7667	0.79	-1.161105301	0.219234303	0.597796202	-2.303780748	0.001097855	0.008367164	hypothetical protein HID58_061323, partial [Brassica napus]	-	-	-	-
MSTRG.35712	FDM3	0.38	0.58	0.55	0.68	1.41	0.85	0.11	0.15	0.09	0.1167	0.98	0.5033	-0.961267606	0.415306793	0.818493095	-2.109121722	0.002945036	0.01898395	factor of DNA methylation 3-like isoform X1 [Brassica napus]	-	-	-	-
MSTRG.35743	At1g49730	0.55	1.12	0.66	1.85	1.99	1.82	0.1	0.16	0.14	0.1333	1.8867	0.7767	-1.280472098	0.104834888	0.384230069	-2.54225805	0.001239715	0.009271424	IRK-interacting protein [Brassica rapa]	-	GO:0031090//organelle membrane;GO:0031984//organelle subcompartment;GO:0044432//endoplasmic reticulum part	GO:0016301//kinase activity;GO:0016705//oxidoreductase activity, acting on paired donors, with incorporation or reduction of molecular oxygen;GO:0019842//vitamin binding;GO:0046914//transition metal ion binding	GO:0009814//defense response, incompatible interaction;GO:0033554//cellular response to stress;GO:0044710//single-organism metabolic process
MSTRG.35808	--	11.88	15.5	12.65	19.27	20.58	18.58	2.81	5.48	2.38	3.5567	19.4767	13.3433	-0.545627674	0.757941453	0.970363857	-1.90752144	9.59E-07	1.80E-05	hypothetical protein HID58_014978 [Brassica napus]	-	-	-	-
MSTRG.35858	ABCA11	0.33	0.56	0.41	0.15	0.14	0.22	0.84	0.72	1.12	0.8933	0.17	0.4333	1.349942471	0.002724054	0.023842684	1.043721377	0.018878182	0.084352091	cellulose synthase A catalytic subunit 5 [UDP-forming] isoform X2 [Eutrema salsugineum]	-	GO:0016020//membrane;GO:0043231//intracellular membrane-bounded organelle;GO:1990234//transferase complex	GO:0046527//glucosyltransferase activity	GO:0000281//mitotic cytokinesis;GO:0003006//developmental process involved in reproduction;GO:0009826//unidimensional cell growth;GO:0010191//mucilage metabolic process;GO:0019758//glycosinolate biosynthetic process;GO:0030243//cellulose metabolic process;GO:0030865//cortical cytoskeleton organization;GO:0042546//cell wall biogenesis;GO:0043479//pigment accumulation in tissues in response to UV l…
MSTRG.36195	--	0.4	0.37	0.51	0.29	0.48	0.52	1.44	0.95	1.12	1.17	0.43	0.4267	-0.011227255	0.404761415	0.810445207	1.45532722	0.004806606	0.028307399	unnamed protein product, partial [Brassica rapa]	-	-	-	-
MSTRG.36271	SRS6	0.46	0.47	0.46	0.56	0.9	0.94	0.05	0.04	0.04	0.0433	0.8	0.4633	-0.787949523	0.743183532	0.965970706	-3.418501355	0.002697729	0.017669173	protein SHI RELATED SEQUENCE 6-like [Brassica napus]	-	GO:0009536//plastid	GO:0043169//cation binding	GO:0009755//hormone-mediated signaling pathway;GO:0009799//specification of symmetry;GO:0009850//auxin metabolic process;GO:0009933//meristem structural organization
MSTRG.36291	GATA8	7.46	8.43	7.61	13.02	14.53	12.61	2.95	4.86	3.6	3.8033	13.3867	7.8333	-0.773098512	0.226434448	0.609175046	-1.042361965	0.000175757	0.001762856	GATA transcription factor 8 isoform X2 [Brassica rapa]	-	GO:0043231//intracellular membrane-bounded organelle	GO:0003677//DNA binding;GO:0046914//transition metal ion binding	GO:0006355//regulation of transcription, DNA-templated;GO:0044707//single-multicellular organism process;GO:0048511//rhythmic process
MSTRG.36353	GLC1	0.53	0.28	0.49	1.06	1.37	0.96	1.84	0.82	1.32	1.3267	1.13	0.4333	-1.38277365	0.06374383	0.275296774	1.614256808	0.000371825	0.003342411	PREDICTED: glucan endo-1,3-beta-glucosidase-like isoform X1 [Brassica oleracea var. oleracea] [Brassica oleracea]	-	GO:0005911//cell-cell junction;GO:0030312//external encapsulating structure	GO:0004553//hydrolase activity, hydrolyzing O-glycosyl compounds	GO:0010243//response to organonitrogen compound;GO:0044238//primary metabolic process
MSTRG.36461	--	0.18	0.17	0.25	0.92	0.15	0.07	2.55	1.73	1.87	2.05	0.38	0.2	-0.925999419	0.717474942	0.954998406	3.357552005	1.89E-09	6.29E-08	BnaCnng72340D, partial [Brassica napus]	-	-	-	-
MSTRG.36604	--	0.57	1.16	0.3	0.48	1.73	1.14	0	0.11	0.1	0.07	1.1167	0.6767	-0.722681368	0.92056392	0.994882214	-3.273018494	0.001487929	0.010782097	BnaC02g31260D [Brassica napus]	ko03420//Nucleotide excision repair;ko03440//Homologous recombination;ko03030//DNA replication;ko03430//Mismatch repair	-	-	-
MSTRG.36629	PIP1-2	7.72	6.46	5.55	2.72	1.16	1.03	4.13	5.7	4.62	4.8167	1.6367	6.5767	2.006596026	1.20E-11	6.34E-10	-0.449321463	0.178181701	0.430904081	50S ribosomal protein L30 [Brassica rapa]	ko03010//Ribosome	GO:0009536//plastid;GO:0031225//anchored component of membrane;GO:0044391//ribosomal subunit	GO:0005198//structural molecule activity;GO:0005372//water transmembrane transporter activity	GO:0006090//pyruvate metabolic process;GO:0006970//response to osmotic stress;GO:0006996//organelle organization;GO:0008104//protein localization;GO:0010038//response to metal ion;GO:0010467//gene expression;GO:0015669//gas transport;GO:0022613//ribonucleoprotein complex biogenesis;GO:0032774//RNA biosynthetic process;GO:0042044//fluid transport
MSTRG.36630	--	9.19	9.29	8.2	4.73	1.38	2.31	5.13	12.84	8.45	8.8067	2.8067	8.8933	1.663866528	2.84E-08	8.60E-07	-0.0141282	0.797265266	0.931138542	50S ribosomal protein L30 [Brassica rapa]	ko03010//Ribosome	GO:0044391//ribosomal subunit	GO:0005198//structural molecule activity	GO:0010467//gene expression;GO:0022613//ribonucleoprotein complex biogenesis;GO:0032774//RNA biosynthetic process
MSTRG.36837	PME36	23.96	15.42	20.47	1.05	0.58	1.37	34.07	44.1	44.34	40.8367	1	19.95	4.318316841	4.28E-65	1.67E-61	1.033476363	1.95E-07	4.29E-06	probable pectinesterase/pectinesterase inhibitor 36 [Brassica rapa]	-	-	-	-
MSTRG.36914	At3g61750	0.8	1.42	1.85	1.41	1.92	2.07	0.45	0.37	0.38	0.4	1.8	1.3567	-0.407930613	0.575112725	0.92122977	-1.761994389	0.000411319	0.003638291	cytochrome b561 and DOMON domain-containing protein At3g61750 isoform X1 [Brassica rapa]	-	GO:0031224//intrinsic component of membrane	GO:0043169//cation binding	GO:0044710//single-organism metabolic process
MSTRG.37116	--	2.95	1.99	3.64	0.82	0.65	1.94	1.15	1.82	2.33	1.7667	1.1367	2.86	1.331205908	6.67E-06	0.0001229	-0.694985288	0.124998225	0.339098365	unnamed protein product [Brassica napus]	-	-	-	-
MSTRG.37231	--	1.63	2.51	2.25	1.61	4.58	3.67	0.27	0.05	0.12	0.1467	3.2867	2.13	-0.625771715	0.984968312	0.995155354	-3.860240502	3.33E-09	1.06E-07	hypothetical protein IGI04_030636 [Brassica rapa subsp. trilocularis] [Brassica rapa]	-	-	-	-
MSTRG.37247	--	0.81	0.31	0.15	0	0	0	2.26	1.33	1.75	1.78	0	0.4233	8.725650281	2.52E-05	0.000407033	2.072011245	0.000123424	0.001298038	BnaA04g12410D [Brassica napus]	-	-	-	-
MSTRG.37335	TGG2	0.62	0	1.85	0	0	0	0.93	0	0	0.31	0	0.8233	9.685332826	0.005004041	0.039117666	-1.40920842	0.576826883	0.851634546	myrosinase-like isoform X2 [Brassica napus]	ko00380//Tryptophan metabolism	GO:0005576//extracellular region;GO:0005618//cell wall;GO:0005840//ribosome;GO:0005911//cell-cell junction;GO:0009536//plastid;GO:0042579//microbody	GO:0015926//glucosidase activity;GO:0043169//cation binding	GO:0001101//response to acid chemical;GO:0006970//response to osmotic stress;GO:0009625//response to insect;GO:0009725//response to hormone;GO:0019759//glycosinolate catabolic process;GO:0044238//primary metabolic process;GO:0050794//regulation of cellular process
MSTRG.37346	--	0.64	0.5	0.85	0.57	1.65	1.29	0	0.04	0.03	0.0233	1.17	0.6633	-0.8187026	0.697744353	0.951016408	-4.829269698	0.000111263	0.00118879	BnaA09g44220D [Brassica napus]	-	GO:0043231//intracellular membrane-bounded organelle	-	-
MSTRG.37497	--	0.21	0.72	0.91	2.34	3.88	2.78	0.17	0.15	0	0.1067	3	0.6133	-2.290219235	0.000463913	0.00534329	-2.523561956	0.033302685	0.130703659	DEAD-box ATP-dependent RNA helicase 36 [Brassica napus]	-	GO:0042995//cell projection;GO:0043231//intracellular membrane-bounded organelle	GO:0032550//purine ribonucleoside binding;GO:0042623//ATPase activity, coupled	GO:0006886//intracellular protein transport;GO:0016072//rRNA metabolic process;GO:0048229//gametophyte development
MSTRG.37656	--	0.54	1.06	1.11	0.29	1.16	0.95	3.01	3.6	4.22	3.61	0.8	0.9033	0.175258446	0.417329162	0.820220256	1.998668486	0.000341471	0.00310858	BnaC02g19890D [Brassica napus]	-	-	-	-
MSTRG.37706	HSP90-6	0.48	0.64	1.05	1.03	2.39	1.98	0	0.09	0.05	0.0467	1.8	0.7233	-1.315264365	0.092875403	0.355259159	-3.95419631	3.56E-05	0.000443206	heat shock protein 90-6, mitochondrial isoform X1 [Brassica napus]	ko04626//Plant-pathogen interaction;ko04141//Protein processing in endoplasmic reticulum	GO:0043231//intracellular membrane-bounded organelle;GO:0044444//cytoplasmic part	-	-
MSTRG.37722	RBP45B	0.65	0.74	0.86	1.35	1.09	1.1	2.01	1.54	1.61	1.72	1.18	0.75	-0.653824359	0.864646108	0.987600272	1.197446064	0.000798715	0.006381246	PREDICTED: polyadenylate-binding protein RBP45B isoform X1 [Brassica oleracea var. oleracea] [Brassica oleracea]	-	GO:0043231//intracellular membrane-bounded organelle	GO:0036094//small molecule binding;GO:0070717//poly-purine tract binding	GO:0000302//response to reactive oxygen species;GO:0000377//RNA splicing, via transesterification reactions with bulged adenosine as nucleophile;GO:0009725//response to hormone
MSTRG.37724	CYP71B7	0.13	0.06	0.14	0	0	0.05	0.83	0.4	0.4	0.5433	0.0167	0.11	2.722466024	0.045985905	0.218505798	2.304334035	0.002049954	0.014083104	PREDICTED: cytochrome P450 71B7-like [Raphanus sativus]	-	-	-	-
MSTRG.37903	SPH5	5.62	11.81	8.14	28.61	54.09	39.43	0	0.2	0.22	0.14	40.71	8.5233	-2.255893562	1.90E-10	8.43E-09	-5.927919022	4.62E-17	4.65E-15	BnaC05g23870D [Brassica napus]	-	-	-	-
MSTRG.37911	--	0.58	0.87	1.12	0.95	1.92	3.04	0.18	0.2	0.16	0.18	1.97	0.8567	-1.201389771	0.087078054	0.340922764	-2.250737047	1.32E-08	3.71E-07	hypothetical protein IGI04_043103 [Brassica rapa subsp. trilocularis] [Brassica rapa]	-	-	-	-
MSTRG.37913	--	1.13	1.91	2.2	0.69	2.25	1.6	0.41	0.28	0.07	0.2533	1.5133	1.7467	0.206874514	0.080001323	0.322598822	-2.785495488	0.000100703	0.001091444	hypothetical protein IGI04_042573 [Brassica rapa subsp. trilocularis] [Brassica rapa]	-	-	-	-
MSTRG.37914	--	0.07	0.15	0.52	0.12	0.34	0.22	0	0	0.05	0.0167	0.2267	0.2467	0.121990524	0.283572302	0.685893335	-3.887525271	0.002333833	0.015690984	BnaA07g03900D [Brassica napus]	-	-	-	-
MSTRG.37916	--	0.62	0.62	0.73	0.73	0.71	1.35	0.15	0.22	0.23	0.2	0.93	0.6567	-0.502069492	0.791852911	0.97358954	-1.715161224	3.27E-05	0.000412299	BnaA07g03900D [Brassica napus]	-	-	-	-
MSTRG.37969	--	0.2	0.32	0.14	0.39	0.62	0.75	0	0	0	0	0.5867	0.22	-1.415037499	0.141126596	0.464272977	-7.781359714	0.000596066	0.004984282	unnamed protein product [Brassica napus]	-	-	-	-
MSTRG.3797	--	4.83	6.47	7.4	11.87	15.31	15.89	2.24	3.28	3.47	2.9967	14.3567	6.2333	-1.203645053	0.000237587	0.002992549	-1.056645249	0.000201934	0.001986606	BnaAnng04500D [Brassica napus]	-	-	-	-
MSTRG.38084	At3g07100	0.14	0.37	0.42	3.14	6.26	3.22	0	0	0	0	4.2067	0.31	-3.762337384	8.48E-08	2.34E-06	-8.276124405	0.016794846	0.076937787	BnaA05g30470D [Brassica napus]	ko04141//Protein processing in endoplasmic reticulum	-	-	-
MSTRG.38106	--	0.34	0.21	0.31	1.34	1.41	1.69	2.44	0.39	1.31	1.38	1.48	0.2867	-2.368151112	0.002971243	0.025660478	2.267222203	0.002814074	0.018285818	GCK domain [Arabidopsis suecica]	-	-	-	-
MSTRG.38159	NET3A	0.3	0.2	0.16	0.76	1.58	0.87	7.34	2.87	4.97	5.06	1.07	0.22	-2.282035368	0.011672983	0.077020564	4.523561956	9.18E-17	9.01E-15	protein NETWORKED 3A isoform X2 [Brassica rapa]	-	-	-	-
MSTRG.38211	At1g50590	0.31	0.21	0.44	0.08	0.3	0.2	3.34	2.97	3.82	3.3767	0.1933	0.32	0.726981506	0.12362826	0.42721041	3.399455958	1.04E-15	8.81E-14	pirin-like protein At1g50590 [Brassica rapa]	-	GO:0043231//intracellular membrane-bounded organelle	GO:0005515//protein binding	-
MSTRG.38219	At1g75680	0.39	0.31	0.28	0.47	0.8	0.81	0.06	0.06	0.03	0.05	0.6933	0.3267	-1.085729874	0.374634267	0.782920953	-2.707819249	0.005484448	0.031561413	PREDICTED: pyrophosphate--fructose 6-phosphate 1-phosphotransferase subunit beta 1 [Camelina sativa]	-	GO:0030312//external encapsulating structure;GO:0043234//protein complex;GO:0044444//cytoplasmic part	GO:0008443//phosphofructokinase activity;GO:0043167//ion binding	GO:0005976//polysaccharide metabolic process;GO:0006084//acetyl-CoA metabolic process;GO:0006090//pyruvate metabolic process;GO:0006796//phosphate-containing compound metabolic process;GO:0009725//response to hormone;GO:0010038//response to metal ion;GO:0016458//gene silencing;GO:0034968//histone lysine methylation;GO:0040007//growth;GO:0048513//animal organ development;GO:0065008//regulation of …
MSTRG.38250	--	1.78	1.56	1.92	1.14	0.62	0.76	0	0.45	0.33	0.26	0.84	1.7533	1.061639066	0.000113774	0.001565029	-2.75351677	0.000148182	0.00151883	BnaC01g43360D [Brassica napus]	-	-	-	-
MSTRG.38251	KIN14N	15.3	17.25	17.14	30.03	30.51	26.32	4.22	9.78	6.07	6.69	28.9533	16.5633	-0.805736411	0.086952904	0.340677233	-1.307914925	4.62E-05	0.000556944	kinesin-like protein KIN-14M [Brassica rapa]	-	GO:0005875//microtubule associated complex	GO:0003774//motor activity;GO:0015631//tubulin binding;GO:0032550//purine ribonucleoside binding	GO:0007017//microtubule-based process
MSTRG.38346	JASON	0.09	0.49	0.2	0.85	1.48	1.38	0	0	0	0	1.2367	0.26	-2.249873158	0.015022505	0.094051249	-8.022367813	0.007997579	0.042791729	protein JASON [Brassica rapa]	-	GO:0043231//intracellular membrane-bounded organelle	-	-
MSTRG.38408	--	1.07	1.29	1.49	4.91	6	4.79	0.55	0.18	0.13	0.2867	5.2333	1.2833	-2.027834208	5.91E-07	1.37E-05	-2.162449881	0.002318228	0.015607423	BnaAnng14350D [Brassica napus]	-	-	-	-
MSTRG.38444	--	0.86	0.67	0.87	1.05	1.04	1.54	2.86	2.11	1.93	2.3	1.21	0.8	-0.596935142	0.99621859	0.998450235	1.523561956	9.43E-05	0.001030743	unnamed protein product [Brassica napus]	-	-	-	-
MSTRG.38484	--	2.35	1.86	4.4	0.55	0.26	0.65	5.43	4.35	6.16	5.3133	0.4867	2.87	2.560044869	1.04E-06	2.28E-05	0.888566487	0.017778128	0.080500333	LOW QUALITY PROTEIN: hypothetical protein HID58_013523 [Brassica napus]	-	-	-	-
MSTRG.38512	RAD16	0.37	0.6	0.46	0.83	1.03	1.14	0.11	0.02	0.16	0.0967	1	0.4767	-1.068947354	0.186854908	0.546908084	-2.301890342	0.001486079	0.010771654	ATP-dependent helicase rhp16 isoform X2 [Brassica rapa]	-	GO:0043231//intracellular membrane-bounded organelle	GO:0003676//nucleic acid binding;GO:0003824//catalytic activity;GO:0032550//purine ribonucleoside binding;GO:0046872//metal ion binding	-
MSTRG.38631	CTN	0.69	0.59	1.2	1.22	1.26	1.01	2.35	1.25	2.25	1.95	1.1633	0.8267	-0.492886916	0.828137238	0.97358954	1.238096504	0.000285748	0.002670006	cactin [Brassica rapa]	-	-	-	-
MSTRG.38674	CDC48E	1.07	0.72	1.21	0.57	0.67	0.7	0.18	0.11	0.28	0.19	0.6467	1	0.628905848	0.001653448	0.015715721	-2.395928676	1.07E-05	0.000154366	protein tesmin/TSO1-like CXC 7 isoform X2 [Brassica napus]	-	GO:0031224//intrinsic component of membrane;GO:0043231//intracellular membrane-bounded organelle	GO:0003824//catalytic activity;GO:0005381//iron ion transmembrane transporter activity	GO:0006826//iron ion transport
MSTRG.38750	BGLU11	12.24	9.17	9.27	2.14	0.67	1.53	25.87	26.23	29.98	27.36	1.4467	10.2267	2.821531535	5.36E-10	2.22E-08	1.419732248	4.24E-15	3.31E-13	PREDICTED: beta-glucosidase 11 isoform X2 [Brassica oleracea var. oleracea] [Brassica oleracea]	ko01100//Metabolic pathways;ko01110//Biosynthesis of secondary metabolites;ko00940//Phenylpropanoid biosynthesis;ko00500//Starch and sucrose metabolism;ko00460//Cyanoamino acid metabolism	-	GO:0015926//glucosidase activity	GO:0044238//primary metabolic process
MSTRG.38777	NIMIN-1	1.26	1.31	1.6	1.09	1.35	1.74	0.18	0.65	0.35	0.3933	1.3933	1.39	-0.003455559	0.141470339	0.464899277	-1.821260524	0.005973196	0.03377679	protein NIM1-INTERACTING 1 [Brassica rapa]	-	-	-	-
MSTRG.38808	KCS1	0.29	0	0.49	0.61	1.29	0.92	5.22	2.7	6.08	4.6667	0.94	0.26	-1.854149134	0.10728522	0.390174013	4.165808893	0.000802667	0.006405706	3-ketoacyl-CoA synthase 1 [Brassica rapa]	ko01100//Metabolic pathways;ko01110//Biosynthesis of secondary metabolites;ko04626//Plant-pathogen interaction;ko00062//Fatty acid elongation	GO:0005840//ribosome;GO:0031224//intrinsic component of membrane;GO:0043231//intracellular membrane-bounded organelle	GO:0004312//fatty acid synthase activity	GO:0006631//fatty acid metabolic process;GO:0006950//response to stress;GO:0007275//multicellular organism development;GO:0009699//phenylpropanoid biosynthetic process
MSTRG.38811	--	2.41	3.12	4.55	3.03	3.74	4.24	11.18	4.92	8.39	8.1633	3.67	3.36	-0.12731883	0.173986941	0.52490332	1.280697135	0.000441741	0.003868879	BnaC05g00740D [Brassica napus]	-	GO:0042579//microbody	-	GO:0000302//response to reactive oxygen species;GO:0043094//cellular metabolic compound salvage;GO:0051707//response to other organism
MSTRG.38852	NAC002	11.81	11.54	14.13	8.06	7.87	10.75	64.78	24	36.15	41.6433	8.8933	12.4933	0.490362286	2.92E-10	1.26E-08	1.736927101	3.16E-08	8.13E-07	NAC domain-containing protein 2 [Brassica rapa]	-	GO:0043231//intracellular membrane-bounded organelle	GO:0001071//nucleic acid binding transcription factor activity	GO:0006972//hyperosmotic response;GO:0009404//toxin metabolic process;GO:0009694//jasmonic acid metabolic process;GO:0009787//regulation of abscisic acid-activated signaling pathway;GO:0010243//response to organonitrogen compound;GO:0010468//regulation of gene expression;GO:0014070//response to organic cyclic compound;GO:0034645//cellular macromolecule biosynthetic process;GO:0044707//single-mult…
MSTRG.38906	--	0.72	0.8	0.71	0.73	1.34	1.14	0.15	0.3	0.35	0.2667	1.07	0.7433	-0.525529587	0.782131172	0.97358954	-1.478971805	0.004510886	0.02689832	BnaC02g44840D [Brassica napus]	-	-	-	-
MSTRG.38962	--	0.96	1.21	1.47	0.94	2.89	2.71	0.45	0.3	0.27	0.34	2.18	1.2133	-0.845352185	0.65049019	0.932788184	-1.835369298	0.00658715	0.036550757	BnaC02g32890D [Brassica napus]	-	-	-	-
MSTRG.38968	TULP6	2.07	2.09	1.71	5.15	5.36	4.25	0.51	0.83	0.71	0.6833	4.92	1.9567	-1.330260313	0.002322528	0.020884551	-1.517736594	0.000110461	0.001181664	tubby-like F-box protein 6 [Brassica rapa]	-	GO:0043231//intracellular membrane-bounded organelle	GO:0042578//phosphoric ester hydrolase activity	GO:0010468//regulation of gene expression;GO:0048229//gametophyte development
MSTRG.39159	At5g56590	1.08	1.28	1.74	2.13	2.64	2.54	0.41	0.51	0.51	0.4767	2.4367	1.3667	-0.834247496	0.355312478	0.764361695	-1.519608763	0.000353219	0.003200256	glucan endo-1,3-beta-glucosidase 13 [Brassica rapa]	-	GO:0005618//cell wall;GO:0031225//anchored component of membrane;GO:0043232//intracellular non-membrane-bounded organelle	GO:0004672//protein kinase activity;GO:0008092//cytoskeletal protein binding;GO:0008422//beta-glucosidase activity;GO:0032550//purine ribonucleoside binding	GO:0003006//developmental process involved in reproduction;GO:0006305//DNA alkylation;GO:0006342//chromatin silencing;GO:0006950//response to stress;GO:0007017//microtubule-based process;GO:0008283//cell proliferation;GO:0009887//organ morphogenesis;GO:0034968//histone lysine methylation;GO:0045229//external encapsulating structure organization;GO:0048580//regulation of post-embryonic development…
MSTRG.39206	ABI2	1.48	1.57	1.16	1.22	1.88	1.61	4.67	1.68	3.9	3.4167	1.57	1.4033	-0.161906827	0.134439285	0.451381125	1.283731771	0.000658025	0.005417264	ABA insensitive PP2C protein 2 [Brassica napus]	ko04075//Plant hormone signal transduction;ko04016//MAPK signaling pathway - plant	GO:0043231//intracellular membrane-bounded organelle	GO:0004721//phosphoprotein phosphatase activity;GO:0019900//kinase binding;GO:0046872//metal ion binding	GO:0000160//phosphorelay signal transduction system;GO:0000302//response to reactive oxygen species;GO:0001933//negative regulation of protein phosphorylation;GO:0006605//protein targeting;GO:0006952//defense response;GO:0006972//hyperosmotic response;GO:0009608//response to symbiont;GO:0009620//response to fungus;GO:0009644//response to high light intensity;GO:0009787//regulation of abscisic aci…
MSTRG.39355	--	0	0	0	1.62	4.05	1.58	0	0	0	0	2.4167	0	-11.23880278	1.25E-05	0.000215843	0	1	1	BnaA10g29580D [Brassica napus]	-	-	-	-
MSTRG.39360	LAC16	0	0	0	0	0.19	0.05	0.22	0.1	0.17	0.1633	0.08	0	-6.321928095	0.296230978	0.701792877	7.351675438	0.008559841	0.045218898	laccase-16 isoform X2 [Brassica rapa]	-	GO:0005576//extracellular region	GO:0016682//oxidoreductase activity, acting on diphenols and related substances as donors, oxygen as acceptor;GO:0043169//cation binding	GO:0009699//phenylpropanoid biosynthetic process;GO:0009808//lignin metabolic process;GO:0009832//plant-type cell wall biogenesis;GO:0045491//xylan metabolic process
MSTRG.39445	OVA6	0.35	0.29	0.25	0.13	0.28	0.03	3.33	4.33	2.93	3.53	0.1467	0.2967	1.016301812	0.076796043	0.313457458	3.572753443	4.38E-16	3.88E-14	proline--tRNA ligase, chloroplastic/mitochondrial isoform X2 [Brassica napus]	ko00970//Aminoacyl-tRNA biosynthesis	GO:0009532//plastid stroma	GO:0004812//aminoacyl-tRNA ligase activity;GO:0032550//purine ribonucleoside binding	GO:0003006//developmental process involved in reproduction;GO:0006418//tRNA aminoacylation for protein translation;GO:0009668//plastid membrane organization;GO:0009791//post-embryonic development;GO:0015979//photosynthesis;GO:0048229//gametophyte development
MSTRG.39623	--	1.85	0.95	2.57	0.91	1.03	1.33	14.11	5.55	8.55	9.4033	1.09	1.79	0.715631452	0.009632609	0.066284722	2.393212673	4.81E-08	1.19E-06	hypothetical protein IGI04_036244 [Brassica rapa subsp. trilocularis] [Brassica rapa]	-	-	-	-
MSTRG.39854	--	1.03	1.85	0.74	2.12	0.43	1.02	0.12	0.32	0.05	0.1633	1.19	1.2067	0.020065623	0.387660839	0.795778612	-2.885136043	0.001185027	0.00892149	sulfhydryl oxidase 1-like [Brassica napus]	-	GO:0030312//external encapsulating structure	GO:0016670//oxidoreductase activity, acting on a sulfur group of donors, oxygen as acceptor	GO:0006813//potassium ion transport;GO:0009651//response to salt stress;GO:0065007//biological regulation
MSTRG.40007	--	0.25	0.19	0.25	0.04	0.04	0.12	2.24	1.25	2.04	1.8433	0.0667	0.23	1.786596362	0.003918109	0.032164404	3.002611213	1.99E-12	1.07E-10	multidrug resistance protein 2 isoform X1 [Brassica rapa]	-	GO:0031224//intrinsic component of membrane	GO:0042895//antibiotic transporter activity	GO:0044763//single-organism cellular process;GO:0045491//xylan metabolic process
MSTRG.40222	--	5.77	8.24	6.85	8.62	10.4	9.67	24	11.26	14.86	16.7067	9.5633	6.9533	-0.45980881	0.611229988	0.932788184	1.264647257	0.000241661	0.002314949	-	-	-	-	-
MSTRG.4035	--	0.1	0.15	0.03	0.7	1.13	1.06	0	0.03	0	0.01	0.9633	0.0933	-3.36757076	0.000128522	0.001744448	-3.222392421	0.144488795	0.374318178	BnaUnng05000D, partial [Brassica napus]	-	-	-	-
MSTRG.40380	DIT1	1.18	1.21	1.28	3.22	4.93	3.8	0.43	0.53	0.62	0.5267	3.9833	1.2233	-1.70315865	1.19E-06	2.59E-05	-1.215855505	0.001547932	0.011148143	dicarboxylate transporter 1, chloroplastic [Brassica napus]	-	GO:0009528//plastid inner membrane;GO:0031224//intrinsic component of membrane;GO:0031976//plastid thylakoid	GO:0015140//malate transmembrane transporter activity	GO:0006536//glutamate metabolic process;GO:0006694//steroid biosynthetic process;GO:0006970//response to osmotic stress;GO:0009746//response to hexose;GO:0015729//oxaloacetate transport;GO:0015743//malate transport;GO:0015813//L-glutamate transport;GO:0030001//metal ion transport;GO:0040007//growth;GO:0042044//fluid transport;GO:0042546//cell wall biogenesis;GO:0051273//beta-glucan metabolic proc…
MSTRG.40453	MYB3R4	0.53	0.77	0.84	1.45	2.66	1.73	0.47	0.36	0.56	0.4633	1.9467	0.7133	-1.448357572	0.002742186	0.023980869	-0.622525914	0.161150938	0.403167919	LOW QUALITY PROTEIN: transcription factor MYB3R-4-like [Brassica rapa]	-	-	-	-
MSTRG.40627	--	13.27	23.02	26.33	33.73	51.74	35.51	0.82	2.18	2	1.6667	40.3267	20.8733	-0.950073152	0.118345577	0.415178402	-3.646623508	2.36E-19	3.18E-17	defensin-like protein 112 [Capsella rubella]	-	-	-	-
MSTRG.40628	--	0.25	2.43	2.04	4.86	6.56	2.97	0	0	0.22	0.0733	4.7967	1.5733	-1.608207827	0.109927056	0.396312653	-4.423211431	0.005399594	0.031177464	unnamed protein product [Brassica rapa]	-	-	-	-
MSTRG.40649	--	5.68	8.85	10.01	12.61	18.14	13.82	0.1	0.49	0.77	0.4533	14.8567	8.18	-0.860937712	0.190743876	0.553819691	-4.173456692	1.04E-18	1.31E-16	unnamed protein product [Brassica napus]	-	-	-	-
MSTRG.40651	--	5.22	9.84	13.5	24.73	30.88	20.76	0.26	1.1	0.9	0.7533	25.4567	9.52	-1.419010044	0.004727746	0.037397037	-3.659601302	7.17E-10	2.55E-08	BnaC03g66980D [Brassica napus]	-	-	-	-
MSTRG.40849	--	1.77	2.1	2.35	3.53	3.65	3.94	0.51	0.77	0.89	0.7233	3.7067	2.0733	-0.838170303	0.276564034	0.677617113	-1.519219538	6.52E-05	0.000750685	BnaCnng45490D [Brassica napus]	-	GO:0009526//plastid envelope;GO:0031976//plastid thylakoid;GO:0043234//protein complex;GO:0044425//membrane part;GO:0044434//chloroplast part	GO:0015291//secondary active transmembrane transporter activity	GO:0006612//protein targeting to membrane;GO:0009668//plastid membrane organization;GO:0009886//post-embryonic morphogenesis
MSTRG.4091	--	18.43	29.15	17.3	49.13	55.04	44.62	20.33	17.09	15.03	17.4833	49.5967	21.6267	-1.197431843	0.005985575	0.045260107	-0.306831047	0.477719374	0.779624691	BnaC05g01130D [Brassica napus]	-	-	-	-
MSTRG.4101	PDH-E1	76.98	87.09	90.16	124.19	132.56	126.98	23.33	43.75	36.26	34.4467	127.91	84.7433	-0.593957276	0.993026819	0.997085654	-1.298735494	1.97E-07	4.32E-06	pyruvate dehydrogenase E1 component subunit alpha-3, chloroplastic [Brassica rapa]	ko01100//Metabolic pathways;ko01110//Biosynthesis of secondary metabolites;ko01200//Carbon metabolism;ko00010//Glycolysis / Gluconeogenesis;ko00620//Pyruvate metabolism;ko00020//Citrate cycle (TCA cycle)	GO:0009526//plastid envelope;GO:0009532//plastid stroma	GO:0004738//pyruvate dehydrogenase activity	GO:0006090//pyruvate metabolic process
MSTRG.41061	--	0.5	0.34	0.32	1.14	1.62	0.99	0.05	0.02	0.02	0.03	1.25	0.3867	-1.69276579	0.012116833	0.079299081	-3.688055994	0.000527068	0.00449571	BnaC05g50200D [Brassica napus]	-	-	-	-
MSTRG.4107	--	0.08	0.14	0.21	1.14	1.27	1.65	0.33	0.3	0	0.21	1.3533	0.1433	-3.239071162	0.002270187	0.020483485	0.551015169	0.644573097	0.889321619	Bone morphogenetic protein [Salix suchowensis]	-	GO:0043231//intracellular membrane-bounded organelle	GO:0043169//cation binding	-
MSTRG.41112	--	1.07	1.45	0.71	1.27	1.41	0.73	6.49	4.91	5.49	5.63	1.1367	1.0767	-0.078237574	0.283216768	0.685499322	2.386563258	3.32E-12	1.72E-10	PREDICTED: cysteine-rich and transmembrane domain-containing protein A [Brassica oleracea var. oleracea] [Brassica oleracea]	-	GO:0016020//membrane	-	GO:0006605//protein targeting;GO:0009891//positive regulation of biosynthetic process;GO:0043067//regulation of programmed cell death
MSTRG.41241	--	1.34	1.31	1.38	4.47	5.05	5.08	1.52	1.19	0.97	1.2267	4.8667	1.3433	-1.857116625	3.22E-06	6.37E-05	-0.131074072	0.960682187	0.984062148	BnaA10g27460D [Brassica napus]	-	-	-	-
MSTRG.41265	REM12	0.58	0.82	0.98	2.45	3.62	2.98	0	0	0	0	3.0167	0.7933	-1.926956219	0.011193277	0.074660509	-9.631783357	0.000798017	0.006376317	B3 domain-containing protein REM2-like [Brassica napus]	-	-	-	-
MSTRG.41268	--	4.29	3.53	3.28	0.31	0.12	0.25	15.12	14.98	15.47	15.19	0.2267	3.7	4.02888112	5.30E-53	1.24E-49	2.037524694	3.19E-30	1.37E-27	methylsterol monooxygenase 2-1-like [Brassica napus]	ko01100//Metabolic pathways;ko01110//Biosynthesis of secondary metabolites;ko00100//Steroid biosynthesis	-	-	-
MSTRG.41375	--	2.79	3.64	4.57	3.69	5.11	4.61	1.08	0.89	1.32	1.0967	4.47	3.6667	-0.285805713	0.165689226	0.510733669	-1.741344035	7.68E-07	1.47E-05	BnaC06g18020D [Brassica napus]	-	-	-	-
MSTRG.41381	--	0	0.42	0.1	1.71	6.54	5.29	0	0	0	0	4.5133	0.1733	-4.702572305	1.09E-05	0.000190642	-7.437405312	0.365324358	0.673920197	PREDICTED: probable histone H2A.7 [Raphanus sativus]	-	GO:0000775//chromosome, centromeric region;GO:0000785//chromatin;GO:0005911//cell-cell junction	GO:0005488//binding	GO:0006325//chromatin organization
MSTRG.41421	--	2.75	1.9	3.5	6.85	7.35	8.75	0.31	0.95	0.6	0.62	7.65	2.7167	-1.493622189	0.002426111	0.021658759	-2.131497438	0.000401938	0.00356528	PREDICTED: ubiquitin-conjugating enzyme E2 2-like [Brassica oleracea var. oleracea] [Brassica oleracea]	ko04120//Ubiquitin mediated proteolysis	-	GO:0016874//ligase activity	GO:0044267//cellular protein metabolic process
MSTRG.4145	FAD2	5.06	4.95	5.46	5.34	5.03	5.94	0.77	2.67	1.32	1.5867	5.4367	5.1567	-0.076283585	0.003665534	0.030423818	-1.700439718	0.000126987	0.001329149	omega-6 fatty acid desaturase, endoplasmic reticulum-like [Brassica napus]	ko01212//Fatty acid metabolism;ko01040//Biosynthesis of unsaturated fatty acids	GO:0031090//organelle membrane;GO:0031224//intrinsic component of membrane;GO:0043231//intracellular membrane-bounded organelle	GO:0016705//oxidoreductase activity, acting on paired donors, with incorporation or reduction of molecular oxygen	GO:0006633//fatty acid biosynthetic process
MSTRG.41528	--	8.4	7.51	8.64	17.36	24.64	25.2	5.47	7.84	8.17	7.16	22.4	8.1833	-1.452738208	1.54E-08	4.87E-07	-0.192729031	0.79367077	0.931138542	BnaCnng70710D [Brassica napus]	-	-	-	-
MSTRG.41535	--	1.66	0.53	1.18	0.3	0.57	0.34	7.28	8.45	16.87	10.8667	0.4033	1.1233	1.477741544	0.000161451	0.002132339	3.274051468	3.10E-15	2.47E-13	PREDICTED: monoacylglycerol lipase ABHD6-like [Brassica oleracea var. oleracea] [Brassica oleracea]	-	-	GO:0003824//catalytic activity	GO:0030001//metal ion transport
MSTRG.41590	TLP1	0.45	0.52	0.46	3.21	4.79	4	1.61	0.44	0.56	0.87	4	0.4767	-3.068947354	6.72E-09	2.28E-07	0.86803466	0.184020541	0.440125578	PREDICTED: thaumatin-like protein 1b [Brassica oleracea var. oleracea] [Brassica oleracea]	-	GO:0031224//intrinsic component of membrane	-	GO:0043207//response to external biotic stimulus
MSTRG.41680	At5g57670	1.2	1.29	1.26	0.96	0.65	0.8	0.19	0.71	0.28	0.3933	0.8033	1.25	0.637857449	0.000397464	0.004673301	-1.668103736	0.004391606	0.026284166	receptor-like cytosolic serine/threonine-protein kinase RBK2 isoform X2 [Brassica rapa]	-	GO:0016020//membrane;GO:0043231//intracellular membrane-bounded organelle	GO:0004672//protein kinase activity;GO:0032550//purine ribonucleoside binding	GO:0006464//cellular protein modification process;GO:0006796//phosphate-containing compound metabolic process;GO:0009755//hormone-mediated signaling pathway
MSTRG.41784	--	0.15	0.11	0.11	0.63	0.93	0.8	0.03	0	0	0.01	0.7867	0.1233	-2.673189684	0.001290798	0.012748478	-3.624490865	0.050627813	0.178375811	Zinc finger RING-type [Arabidopsis suecica]	ko04141//Protein processing in endoplasmic reticulum	-	GO:0046914//transition metal ion binding	-
MSTRG.42038	--	1.75	1.36	1.37	0.45	0.21	0.39	8.07	6.42	7.68	7.39	0.35	1.4933	2.093109404	0.000966223	0.00999892	2.307038133	1.76E-08	4.80E-07	LOW QUALITY PROTEIN: hypothetical protein HID58_013523 [Brassica napus]	-	-	-	-
MSTRG.42091	--	5.6	5.86	5.67	21.42	24.19	24.16	0.25	1.21	0.21	0.5567	23.2567	5.71	-2.026081682	3.36E-15	3.02E-13	-3.358605144	7.87E-08	1.88E-06	BnaC06g06660D [Brassica napus]	-	-	-	-
MSTRG.42092	--	0	0	0	0.65	0.63	0.57	0	0	0	0	0.6167	0	-9.268347055	0.001320261	0.012990875	0	1	1	BnaC06g06660D [Brassica napus]	-	-	-	-
MSTRG.42102	MAM1	0	0	0	2.5	2.18	0.9	0	0	0	0	1.86	0	-10.86108691	3.29E-10	1.41E-08	0	1	1	methylthioalkylmalate synthase 2, chloroplastic [Eutrema salsugineum]	ko01110//Biosynthesis of secondary metabolites;ko01210//2-Oxocarboxylic acid metabolism;ko00966//Glucosinolate biosynthesis	GO:0009526//plastid envelope	GO:0046912//transferase activity, transferring acyl groups, acyl groups converted into alkyl on transfer	GO:0000097//sulfur amino acid biosynthetic process;GO:0006551//leucine metabolic process;GO:0006950//response to stress;GO:0009683//indoleacetic acid metabolic process;GO:0019758//glycosinolate biosynthetic process;GO:0051707//response to other organism
MSTRG.42106	--	15.58	14.35	11.85	12.02	18.5	18.92	2.3	4.9	4.53	3.91	16.48	13.9267	-0.242866251	0.037001412	0.186157087	-1.832609479	5.02E-09	1.54E-07	hypothetical protein IGI04_037398 [Brassica rapa subsp. trilocularis] [Brassica rapa]	-	-	-	-
MSTRG.42108	--	0.49	0.87	0.71	1.37	1.97	3.06	0	0.18	0.1	0.0933	2.1333	0.69	-1.628441137	0.009375248	0.064851802	-2.886132035	0.000823046	0.006551813	mutant gag-pol polyprotein [Gossypium australe]	-	-	-	-
MSTRG.42124	--	0.95	0.77	0.95	0.45	0.36	0.31	1.04	1.16	1.47	1.2233	0.3733	0.89	1.25334101	4.84E-06	9.22E-05	0.458940321	0.087513751	0.264531417	BnaC05g29090D [Brassica napus]	-	-	-	-
MSTRG.42125	--	9.56	5.91	11.94	3.68	4.23	4.45	27.53	18.34	21.99	22.62	4.12	9.1367	1.149023585	1.71E-09	6.54E-08	1.307859102	1.45E-06	2.59E-05	hypothetical protein DY000_02003931 [Brassica cretica]	-	-	-	-
MSTRG.42142	RR21	2.73	2.18	3.87	2.86	3.41	1.24	0.61	1.49	0.78	0.96	2.5033	2.9267	0.225408032	0.067568222	0.28685042	-1.608152128	0.004063234	0.024652779	BnaA05g28150D [Brassica napus]	-	GO:0043231//intracellular membrane-bounded organelle	GO:0001071//nucleic acid binding transcription factor activity;GO:0003676//nucleic acid binding	GO:0010468//regulation of gene expression;GO:0044237//cellular metabolic process
MSTRG.42175	GSTT3	0.07	0.09	0.05	0.68	0.94	0.52	0.21	0.02	0.02	0.0833	0.7133	0.07	-3.349149564	0.000140801	0.001889798	0.251538767	0.765983108	0.928158637	PREDICTED: glutathione S-transferase T3-like [Brassica oleracea var. oleracea] [Brassica oleracea]	-	-	-	-
MSTRG.42274	POPTRDRAFT_746969	0.63	0.93	0.77	1.53	2.79	1.33	0.09	0.12	0.11	0.1067	1.8833	0.7767	-1.277920913	0.133166032	0.448726052	-2.864186145	0.000497783	0.00428427	PREDICTED: pollen-specific leucine-rich repeat extensin-like protein 2 [Brassica oleracea var. oleracea] [Brassica oleracea]	ko01100//Metabolic pathways;ko01110//Biosynthesis of secondary metabolites;ko01230//Biosynthesis of amino acids;ko01210//2-Oxocarboxylic acid metabolism;ko00220//Arginine biosynthesis	-	-	-
MSTRG.42447	--	0.77	0.38	0.52	1.44	1.43	1.13	0	0	0	0	1.3333	0.5567	-1.260151897	0.145202792	0.472122507	-9.120669887	6.42E-07	1.26E-05	transcription factor VIP1-like [Brassica napus]	-	-	-	-
MSTRG.42554	--	0.9	1.12	0.58	4.56	6.38	3.22	0.07	0.32	0	0.13	4.72	0.8667	-2.445237737	3.26E-05	0.000512941	-2.736965594	0.013673738	0.065671212	unnamed protein product [Brassica napus]	-	-	-	-
MSTRG.4263	CAT7	0.29	0.33	0.48	0.27	0.58	0.49	0.02	0.06	0.06	0.0467	0.4467	0.3667	-0.284729477	0.50648026	0.883622522	-2.974004791	0.000664111	0.005461993	cationic amino acid transporter 7, chloroplastic [Brassica rapa]	-	GO:0031224//intrinsic component of membrane;GO:0042170//plastid membrane	GO:0015171//amino acid transmembrane transporter activity	GO:0006865//amino acid transport;GO:0051707//response to other organism
MSTRG.42664	--	0.12	0.17	0.17	0	0	0	0.66	1.04	0.61	0.77	0	0.1533	7.26052755	0.021307516	0.123150548	2.328187085	0.004769355	0.028119426	hypothetical protein DY000_02016420 [Brassica cretica]	-	-	-	-
MSTRG.42674	--	0.61	1.06	0.79	1.04	0.44	1.6	0	0.19	0	0.0633	1.0267	0.82	-0.324272035	0.761241509	0.970363857	-3.694586992	0.007160547	0.039120351	hypothetical protein HID58_083686, partial [Brassica napus]	-	-	-	-
MSTRG.42706	CRK11	0.3	0.68	0.4	2.52	2.43	2.09	0.03	0.08	0.05	0.0533	2.3467	0.46	-2.350907162	5.58E-06	0.000104825	-3.108524457	0.000966372	0.007498766	cysteine-rich receptor-like protein kinase 11 isoform X4 [Brassica rapa]	-	-	-	-
MSTRG.42720	--	6.8	10.59	9.68	10.25	7.76	8.92	1.74	3.01	3.46	2.7367	8.9767	9.0233	0.007480658	0.007939851	0.056934029	-1.72124076	1.88E-07	4.15E-06	-	-	-	-	-
MSTRG.42896	--	0.25	0.83	0.88	0.58	1.43	1	0	0	0	0	1.0033	0.6533	-0.618909833	0.979499231	0.994882214	-9.351675438	7.86E-05	0.00088262	BnaA02g09730D [Brassica napus]	-	-	-	-
MSTRG.42908	LCR30	2.36	5.69	5.92	5.05	13.05	8	0	0.32	0.2	0.1733	8.7	4.6567	-0.901717786	0.486834665	0.872617713	-4.747676587	3.90E-08	9.84E-07	defensin-like protein 122 [Eutrema salsugineum]	-	-	-	-
MSTRG.42910	LCR30	11.56	23.25	19.93	16.93	25.41	16.14	1.13	1.48	1.72	1.4433	19.4933	18.2467	-0.095347877	0.0537471	0.244755194	-3.660156505	1.79E-19	2.47E-17	defensin-like protein 122 [Eutrema salsugineum]	-	-	-	-
MSTRG.4304	--	53.02	93.57	95.98	72.43	100.41	72.37	17.58	18.08	22.53	19.3967	81.7367	80.8567	-0.01561668	0.002731527	0.023900421	-2.059557984	3.71E-16	3.30E-14	BnaC01g38920D [Brassica napus]	-	-	-	-
MSTRG.43046	--	0.48	0.71	6.63	7.68	15.09	14.47	0.12	0.15	0.17	0.1467	12.4133	2.6067	-2.25161256	0.045125273	0.21526625	-4.151593179	3.88E-05	0.000478051	BnaC07g15840D [Brassica napus]	-	-	-	-
MSTRG.43327	DXS	5.82	6.47	6.73	11.49	13.37	12.49	0.72	1.61	1.07	1.1333	12.45	6.34	-0.973590997	0.000679874	0.007413401	-2.483910595	1.63E-16	1.53E-14	PREDICTED: 1-deoxy-D-xylulose-5-phosphate synthase, chloroplastic [Brassica oleracea var. oleracea] [Brassica oleracea]	ko01100//Metabolic pathways;ko01110//Biosynthesis of secondary metabolites;ko00900//Terpenoid backbone biosynthesis;ko00730//Thiamine metabolism	GO:0009532//plastid stroma	GO:0016744//transferase activity, transferring aldehyde or ketonic groups;GO:0043169//cation binding	GO:0000097//sulfur amino acid biosynthetic process;GO:0006090//pyruvate metabolic process;GO:0006355//regulation of transcription, DNA-templated;GO:0006468//protein phosphorylation;GO:0006544//glycine metabolic process;GO:0006633//fatty acid biosynthetic process;GO:0006732//coenzyme metabolic process;GO:0006753//nucleoside phosphate metabolic process;GO:0006772//thiamine metabolic process;GO:0006…
MSTRG.43479	At1g62810	0.8	1.27	0.96	1.73	3.25	2.89	0.17	0.33	0.25	0.25	2.6233	1.01	-1.377045842	0.002174336	0.01975832	-2.014355293	4.82E-07	9.69E-06	PREDICTED: primary amine oxidase [Brassica oleracea var. oleracea] [Brassica oleracea]	ko01100//Metabolic pathways;ko01110//Biosynthesis of secondary metabolites;ko00260//Glycine, serine and threonine metabolism;ko00360//Phenylalanine metabolism;ko00410//beta-Alanine metabolism;ko00350//Tyrosine metabolism;ko00960//Tropane, piperidine and pyridine alkaloid biosynthesis;ko00950//Isoquinoline alkaloid biosynthesis	-	GO:0016641//oxidoreductase activity, acting on the CH-NH2 group of donors, oxygen as acceptor;GO:0046914//transition metal ion binding;GO:0048037//cofactor binding	GO:0044710//single-organism metabolic process;GO:1901564//organonitrogen compound metabolic process
MSTRG.43515	OBGL	1.16	0.92	1.29	2.44	4.03	3.22	0.04	0.21	0.18	0.1433	3.23	1.1233	-1.523748074	0.001139414	0.011490446	-2.970340026	6.74E-06	0.000101664	GTP1/OBG domain [Arabidopsis thaliana x Arabidopsis arenosa]	-	-	-	GO:0009987//cellular process
MSTRG.43544	--	0.82	1.26	1.32	0.64	1.01	0.97	8.58	7.45	11.65	9.2267	0.8733	1.1333	0.375967935	0.011357745	0.075457677	3.025237291	5.35E-30	2.23E-27	Transposon En/Spm-like [Arabidopsis thaliana x Arabidopsis arenosa]	-	-	-	-
MSTRG.4356	--	14.06	13.44	13.51	20.99	36.08	35.5	36.77	19.56	28.85	28.3933	30.8567	13.67	-1.174568978	0.00677995	0.050133832	1.054538986	2.99E-05	0.000380574	unnamed protein product [Triticum turgidum subsp. durum] [Triticum turgidum]	-	-	-	-
MSTRG.43584	--	0.23	0	0.21	0	0	0	3.07	4.55	4.27	3.9633	0	0.1467	7.196397213	0.048180456	0.226218135	4.756101381	8.04E-14	5.29E-12	BnaC09g52420D [Brassica napus]	ko03420//Nucleotide excision repair;ko03440//Homologous recombination;ko03030//DNA replication;ko03430//Mismatch repair	-	-	-
MSTRG.43679	MHK	0.99	1.51	1.01	3.88	4.47	2.96	0.16	0.16	0.15	0.1567	3.77	1.17	-1.688055994	0.000177042	0.002313984	-2.900738369	2.63E-07	5.61E-06	PREDICTED: serine/threonine-protein kinase MHK-like isoform X2 [Brassica oleracea var. oleracea] [Brassica oleracea]	-	GO:0043231//intracellular membrane-bounded organelle	GO:0004674//protein serine/threonine kinase activity;GO:0032550//purine ribonucleoside binding	GO:0006305//DNA alkylation;GO:0006342//chromatin silencing;GO:0006417//regulation of translation;GO:0007017//microtubule-based process;GO:0034968//histone lysine methylation;GO:0048449//floral organ formation;GO:0048580//regulation of post-embryonic development;GO:0051052//regulation of DNA metabolic process;GO:1901990//regulation of mitotic cell cycle phase transition;GO:1902410//mitotic cytokin…
MSTRG.43682	--	5.87	6.41	7.65	9.53	12.19	13.08	1.03	2.31	2.93	2.09	11.6	6.6433	-0.804145596	0.18261419	0.539863954	-1.668404362	2.72E-06	4.53E-05	unnamed protein product [Brassica napus]	-	-	-	-
MSTRG.43691	--	5.84	8.32	10.05	14.04	15.83	16.77	2.39	4.07	4.37	3.61	15.5467	8.07	-0.945964709	0.151402462	0.483675239	-1.160569836	0.003321643	0.02095054	hypothetical protein F2Q70_00044942 [Brassica cretica]	-	-	-	-
MSTRG.43711	--	1.33	2.79	2.55	1.77	2.29	3.09	0.47	0.96	0.61	0.68	2.3833	2.2233	-0.10025648	0.136196786	0.454893376	-1.709117609	0.000481182	0.004164045	BnaCnng29830D [Brassica napus]	-	-	-	-
MSTRG.43719	VPS45	0.44	0.67	0.77	1.98	3.51	3	0.2	0.29	0.07	0.1867	2.83	0.6267	-2.175031892	1.16E-05	0.000202502	-1.74723393	0.023143649	0.098655838	vacuolar protein sorting-associated protein 45 homolog isoform X2 [Brassica napus]	ko04144//Endocytosis	GO:0005774//vacuolar membrane;GO:0031984//organelle subcompartment	GO:0005488//binding;GO:0022892//substrate-specific transporter activity	GO:0006605//protein targeting;GO:0006865//amino acid transport;GO:0015672//monovalent inorganic cation transport;GO:0015748//organophosphate ester transport;GO:0016482//cytoplasmic transport;GO:0043067//regulation of programmed cell death;GO:0048278//vesicle docking;GO:0051049//regulation of transport;GO:0051707//response to other organism;GO:0061024//membrane organization;GO:0070838//divalent me…
MSTRG.43741	--	4.33	4.07	4.25	6.82	9.95	9.48	1.42	2.29	1.84	1.85	8.75	4.2167	-1.053180038	0.008607218	0.060688008	-1.188577708	8.44E-05	0.000936632	BnaC01g23620D [Brassica napus]	-	-	-	-
MSTRG.43809	--	0.18	0.24	0.12	0	0.05	0.19	1.07	0.61	0.83	0.8367	0.08	0.18	1.169925001	0.143615713	0.468995078	2.216656052	0.000327433	0.003000312	HR-like lesion-inducer [Arabidopsis thaliana x Arabidopsis arenosa]	-	GO:0043231//intracellular membrane-bounded organelle	-	GO:0009605//response to external stimulus;GO:0009628//response to abiotic stimulus;GO:0033554//cellular response to stress;GO:0044699//single-organism process;GO:1901700//response to oxygen-containing compound
MSTRG.43862	--	1.91	1.95	1.69	1.67	2.1	2.1	4.91	3.56	4.26	4.2433	1.9567	1.85	-0.080872732	0.121421121	0.422652706	1.197672743	5.59E-05	0.000657062	hypothetical protein F2Q69_00034997 [Brassica cretica]	-	-	-	-
MSTRG.43881	--	1.34	1.49	1.94	3.13	3.59	4.04	0.37	0.78	0.78	0.6433	3.5867	1.59	-1.173616907	0.039180669	0.194373928	-1.305388419	0.009532157	0.04930153	replication protein A 70 kDa DNA-binding subunit D-like [Brassica napus]	ko03420//Nucleotide excision repair;ko03440//Homologous recombination;ko03030//DNA replication;ko03430//Mismatch repair	GO:0005911//cell-cell junction	-	-
MSTRG.43906	--	0.52	0.31	0.52	0.73	0.95	1.41	3.01	2.02	2.43	2.4867	1.03	0.45	-1.194647431	0.755706269	0.970363857	2.466216223	8.20E-07	1.56E-05	Zinc finger TTF-type [Arabidopsis thaliana x Arabidopsis arenosa]	-	-	-	-
MSTRG.43919	GSTT3	0.77	1.36	0.7	2.77	3.5	1.92	0.47	0.2	0.18	0.2833	2.73	0.9433	-1.533061399	0.004285714	0.034568695	-1.735267307	0.002009566	0.013864658	Harbinger transposase-derived protein [Arabidopsis suecica]	-	-	-	-
MSTRG.43976	--	0.31	0.57	0.59	1.09	1.92	1.94	0.29	0.36	0.39	0.3467	1.65	0.49	-1.75161237	0.006390438	0.047826606	-0.499232627	0.523501261	0.814483065	unnamed protein product, partial [Brassica napus]	-	-	-	-
MSTRG.44007	--	4.03	4.45	5.15	10.83	17.74	11.96	3.26	4.94	2.62	3.6067	13.51	4.5433	-1.572204613	9.09E-05	0.001278814	-0.333085063	0.56931765	0.845186586	hypothetical protein HID58_043276 [Brassica napus]	-	-	-	-
MSTRG.44020	--	0.88	1.21	1.35	1.2	1.17	0.9	0.23	0.65	0.56	0.48	1.09	1.1467	0.073117929	0.025144198	0.139229556	-1.256339753	0.008210155	0.043736797	BnaCnng68060D [Brassica napus]	-	-	-	-
MSTRG.44024	XTH11	0.08	0.04	0.08	0	0.07	0	3.49	1.42	3.84	2.9167	0.0233	0.0667	1.514573173	0.282081811	0.684054944	5.451211112	6.37E-12	3.16E-10	PREDICTED: probable xyloglucan endotransglucosylase/hydrolase protein 11 [Brassica oleracea var. oleracea] [Brassica oleracea]	-	GO:0005576//extracellular region	GO:0016757//transferase activity, transferring glycosyl groups;GO:0016787//hydrolase activity	GO:0005975//carbohydrate metabolic process;GO:0009987//cellular process;GO:0071840//cellular component organization or biogenesis
MSTRG.44080	--	10.73	9.95	9.67	4.62	2.26	3.5	12.65	18.26	15.76	15.5567	3.46	10.1167	1.547890073	1.15E-16	1.27E-14	0.620798951	0.000182331	0.001819794	probable serine/threonine-protein kinase At1g09600, partial [Brassica napus]	-	-	-	-
MSTRG.44131	--	0.22	0.16	0.41	0.21	0.12	0.2	0.92	0.69	0.99	0.8667	0.1767	0.2633	0.575860294	0.102755134	0.379208975	1.718587065	0.00037979	0.003402674	uncharacterized protein LOC111203737 [Brassica napus]	-	-	-	-
MSTRG.44166	At4g16620	0.91	1.26	1.48	2.12	3.84	2.69	0.12	0.41	0.3	0.2767	2.8833	1.2167	-1.244803669	0.032215783	0.167955471	-2.136713222	0.000116608	0.001237217	WAT1-related protein At4g16620-like [Brassica napus]	-	GO:0044444//cytoplasmic part	-	-
MSTRG.44172	--	3.71	5.88	6.51	4.87	7.1	10.11	0.41	0.56	0.17	0.38	7.36	5.3667	-0.455679484	0.508888017	0.885238016	-3.819954959	4.46E-21	7.28E-19	B-box zinc finger protein 18 [Brassica napus]	-	-	-	-
MSTRG.44173	--	1.15	0.93	1.94	1.12	3.65	1.69	0.81	0.34	0.43	0.5267	2.1533	1.34	-0.684338664	0.811130735	0.97358954	-1.347270943	3.38E-07	7.02E-06	B-box zinc finger protein 18 [Brassica napus]	-	-	-	-
MSTRG.44195	RZ1B	0.24	0.38	0.33	0.73	1.02	0.88	1.09	0.6	0.82	0.8367	0.8767	0.3167	-1.469063381	0.057183132	0.255372436	1.401687946	0.00254926	0.016875647	PREDICTED: LOW QUALITY PROTEIN: glycine-rich RNA-binding protein RZ1B [Brassica oleracea var. oleracea] [Brassica oleracea]	ko03040//Spliceosome	-	GO:0005488//binding	-
MSTRG.44233	GID8	0.66	0.75	0.86	1.35	1.76	2.18	0	0.15	0.31	0.1533	1.7633	0.7567	-1.220575425	0.079551333	0.321274962	-2.302986531	0.005969028	0.033760459	PREDICTED: LOW QUALITY PROTEIN: glucose-induced degradation protein 8 homolog [Brassica oleracea var. oleracea] [Brassica oleracea]	-	GO:0043231//intracellular membrane-bounded organelle	-	-
MSTRG.44234	CKL7	10.7	11.5	13.57	14.42	17.72	16.83	2.23	6.33	4.59	4.3833	16.3233	11.9233	-0.453148078	0.211560941	0.58610124	-1.443687319	7.38E-05	0.000836847	casein kinase 1-like protein 7 isoform X2 [Brassica rapa]	-	-	GO:0004672//protein kinase activity	GO:0006796//phosphate-containing compound metabolic process
MSTRG.44327	SDH	0	0	0.23	0	0.1	0	0.78	0.42	1.16	0.7867	0.0333	0.0767	1.201633861	0.46881012	0.861910118	3.359081093	0.000784421	0.006280368	PREDICTED: sorbitol dehydrogenase [Raphanus sativus]	ko01100//Metabolic pathways;ko00040//Pentose and glucuronate interconversions;ko00051//Fructose and mannose metabolism	GO:0005911//cell-cell junction;GO:0031090//organelle membrane;GO:0044444//cytoplasmic part	GO:0046914//transition metal ion binding	GO:0044710//single-organism metabolic process
MSTRG.44331	--	0.32	0.25	0.23	0.47	0.61	0.42	0	0	0	0	0.5	0.2667	-0.906890596	0.753909625	0.970363857	-8.058893689	0.008894935	0.046634457	protein ALP1-like isoform X1 [Brassica rapa]	-	-	-	-
MSTRG.44423	TRB2	1.29	1.78	1.67	0.82	0.94	1.05	0.04	0.4	0.21	0.2167	0.9367	1.58	0.754316929	5.81E-05	0.000858684	-2.866375436	1.01E-05	0.000146346	PREDICTED: telomere repeat-binding factor 2-like [Brassica oleracea var. oleracea] [Brassica oleracea]	ko04626//Plant-pathogen interaction	GO:0032991//macromolecular complex;GO:0043231//intracellular membrane-bounded organelle;GO:0043232//intracellular non-membrane-bounded organelle	GO:0003690//double-stranded DNA binding;GO:0003697//single-stranded DNA binding;GO:0043565//sequence-specific DNA binding;GO:0046983//protein dimerization activity	GO:0001101//response to acid chemical;GO:0006970//response to osmotic stress;GO:0009725//response to hormone;GO:0010038//response to metal ion
MSTRG.44595	CPK32	0.73	0.54	0.65	1.38	2.21	2.24	0.05	0.23	0.07	0.1167	1.9433	0.64	-1.602389572	0.00244481	0.021794782	-2.455679484	0.000988322	0.007642103	PREDICTED: chloroplastic group IIA intron splicing facilitator CRS1, chloroplastic-like [Brassica oleracea var. oleracea] [Brassica oleracea]	-	GO:0009536//plastid	-	GO:0001101//response to acid chemical;GO:0003006//developmental process involved in reproduction;GO:0006090//pyruvate metabolic process;GO:0009658//chloroplast organization;GO:0009668//plastid membrane organization;GO:0016070//RNA metabolic process;GO:0016109//tetraterpenoid biosynthetic process;GO:0046471//phosphatidylglycerol metabolic process
MSTRG.44599	CDKB1-2	0.45	0.45	0.37	1.15	0.92	0.68	0.05	0.09	0	0.0467	0.9167	0.4233	-1.114603122	0.360280363	0.76968773	-3.181329765	0.009430661	0.048898097	BnaC01g43940D [Brassica napus]	-	-	-	-
MSTRG.44607	RH51	1.19	1.38	2.12	2.3	1.86	2.26	5.91	3.28	4.37	4.52	2.14	1.5633	-0.452985375	0.727308338	0.958180904	1.531697351	3.60E-07	7.44E-06	PREDICTED: DEAD-box ATP-dependent RNA helicase 51-like isoform X2 [Brassica oleracea var. oleracea] [Brassica oleracea]	-	GO:0043231//intracellular membrane-bounded organelle;GO:0043232//intracellular non-membrane-bounded organelle;GO:0044444//cytoplasmic part	GO:0003676//nucleic acid binding;GO:0032550//purine ribonucleoside binding;GO:0042623//ATPase activity, coupled	GO:0006221//pyrimidine nucleotide biosynthetic process;GO:0009451//RNA modification;GO:0016571//histone methylation;GO:0048580//regulation of post-embryonic development
MSTRG.44619	--	0.22	0.75	0.71	1.25	0.98	1.77	0	0.1	0	0.0333	1.3333	0.56	-1.251538767	0.225712605	0.608257923	-4.070389328	0.002623007	0.017268737	hypothetical protein IGI04_007214 [Brassica rapa subsp. trilocularis] [Brassica rapa]	-	-	-	-
MSTRG.44622	NAC079	0	0.3	0.46	0.03	0.22	0.15	1.82	2.99	6.41	3.74	0.1333	0.2533	0.925999419	0.216123698	0.592631337	3.883929447	9.00E-09	2.63E-07	PREDICTED: NAC domain-containing protein 100 [Brassica oleracea var. oleracea] [Brassica oleracea]	-	GO:0043231//intracellular membrane-bounded organelle	GO:0001071//nucleic acid binding transcription factor activity	GO:0010087//phloem or xylem histogenesis;GO:0010468//regulation of gene expression;GO:0034645//cellular macromolecule biosynthetic process;GO:0044707//single-multicellular organism process
MSTRG.4473	SH3P3	1.57	2.52	1.19	7.85	11.82	8.29	0.36	0.75	0.75	0.62	9.32	1.76	-2.404754526	1.41E-11	7.37E-10	-1.505235308	0.001759459	0.012416376	SH3 domain-containing protein 3 [Eutrema salsugineum]	ko00910//Nitrogen metabolism	GO:0009536//plastid	GO:0016836//hydro-lyase activity;GO:0046914//transition metal ion binding	GO:0044699//single-organism process
MSTRG.44980	RE2	0.03	0.08	0.11	0.34	0.33	0.39	0.01	0.03	0.02	0.02	0.3533	0.0733	-2.268488836	0.00060248	0.00668527	-1.874469118	0.101019321	0.292745411	01P13-1 [Brassica rapa subsp. pekinensis] [Brassica rapa]	-	-	-	-
MSTRG.45384	--	1.08	0.94	1.87	0.93	0.81	1.51	9.77	7.23	7.07	8.0233	1.0833	1.2967	0.259330437	0.081770428	0.32727758	2.629394081	1.44E-15	1.19E-13	hypothetical protein F2Q69_00018697 [Brassica cretica]	-	-	-	-
MSTRG.45478	RH46	0.92	1.05	1.06	1.13	1.55	1.57	0.14	0.53	0.38	0.35	1.4167	1.01	-0.488145048	0.68076685	0.944519617	-1.528928466	0.003156994	0.020091831	PREDICTED: DEAD-box ATP-dependent RNA helicase 46 [Brassica oleracea var. oleracea] [Brassica oleracea]	ko03040//Spliceosome	GO:0043231//intracellular membrane-bounded organelle	GO:0003676//nucleic acid binding;GO:0003724//RNA helicase activity;GO:0032550//purine ribonucleoside binding;GO:0042623//ATPase activity, coupled	GO:0016072//rRNA metabolic process;GO:0071555//cell wall organization
MSTRG.45506	RAB28	2.09	1.82	2.89	0.14	0.09	0.24	82.28	30.35	52.13	54.92	0.1567	2.2667	3.854802084	2.08E-13	1.40E-11	4.598687475	5.16E-38	4.00E-35	PREDICTED: late embryogenesis abundant protein D-34-like [Brassica oleracea var. oleracea] [Brassica oleracea]	-	GO:0044444//cytoplasmic part	-	GO:0003006//developmental process involved in reproduction;GO:0006721//terpenoid metabolic process
MSTRG.45540	PAT18	0.08	0	0.14	0.06	0.15	0.03	0.58	0.88	1.47	0.9767	0.08	0.0733	-0.125530882	0.781470928	0.97358954	3.735325236	1.42E-05	0.00019827	protein S-acyltransferase 18 [Capsella rubella]	-	-	-	GO:0008152//metabolic process;GO:0044763//single-organism cellular process
MSTRG.45579	ABCG25	0.57	0.99	0.79	1.96	2.51	2.86	0	0.09	0	0.03	2.4433	0.7833	-1.641152442	0.000686673	0.007475585	-4.706591945	2.55E-06	4.27E-05	ABC transporter G family member 25-like [Brassica napus]	-	GO:0031224//intrinsic component of membrane	GO:0015098//molybdate ion transmembrane transporter activity;GO:0015405//P-P-bond-hydrolysis-driven transmembrane transporter activity;GO:0017111//nucleoside-triphosphatase activity;GO:0032550//purine ribonucleoside binding	GO:0001101//response to acid chemical;GO:0015698//inorganic anion transport;GO:0015718//monocarboxylic acid transport;GO:0044763//single-organism cellular process
MSTRG.45941	--	2.47	2.46	3	2.5	3.59	4.23	0.29	0.51	1.13	0.6433	3.44	2.6433	-0.3800502	0.5306913	0.896098102	-2.038720018	0.001164544	0.008785681	unnamed protein product, partial [Brassica oleracea]	-	-	-	-
MSTRG.46003	At4g26340	0.45	0.22	0.25	0.25	0.26	0.37	2.28	0.92	0.9	1.3667	0.2933	0.3067	0.064130337	0.313013961	0.720179369	2.155918143	0.000191811	0.001900016	PREDICTED: F-box/FBD/LRR-repeat protein At4g26340-like [Brassica oleracea var. oleracea] [Brassica oleracea]	-	-	-	-
MSTRG.46021	At5g65490	0.47	0.11	0.22	0	0	0	5.02	8.9	6.49	6.8033	0	0.2667	8.058893689	0.001847605	0.017236873	4.673132372	1.08E-18	1.36E-16	PREDICTED: protein ecdysoneless homolog [Brassica oleracea var. oleracea] [Brassica oleracea]	-	GO:0009536//plastid	GO:0005488//binding;GO:0016740//transferase activity	GO:0006464//cellular protein modification process
MSTRG.46153	CER3	1.03	0.47	0.86	0.27	0.75	0.86	3.58	4.44	5.84	4.62	0.6267	0.7867	0.328054198	0.041736352	0.20340321	2.554068493	1.67E-16	1.57E-14	PREDICTED: protein ECERIFERUM 3 [Brassica oleracea var. oleracea] [Brassica oleracea]	-	GO:0031090//organelle membrane;GO:0031224//intrinsic component of membrane;GO:0043231//intracellular membrane-bounded organelle	GO:0003824//catalytic activity;GO:0046914//transition metal ion binding	GO:0003006//developmental process involved in reproduction;GO:0006631//fatty acid metabolic process;GO:0007275//multicellular organism development;GO:0009058//biosynthetic process;GO:0043446//cellular alkane metabolic process
MSTRG.4626	--	1.35	1.73	0.96	2.56	5.04	4.26	0.24	0.53	0.14	0.3033	3.9533	1.3467	-1.553676812	0.031928839	0.166820793	-2.150416843	0.008467282	0.044814206	hypothetical protein DY000_02061157 [Brassica cretica]	-	-	-	-
MSTRG.46294	--	5.85	6.13	6.48	7.95	8.05	8.67	0.62	3.07	2.91	2.2	8.2233	6.1533	-0.418355163	0.281703057	0.683647437	-1.483864623	0.002727961	0.017821433	protein SDA1 homolog [Eutrema salsugineum]	-	GO:0005623//cell	-	GO:0006405//RNA export from nucleus;GO:0006886//intracellular protein transport
MSTRG.46302	--	1.22	1.35	1.24	3.54	4.6	4.26	0.06	0.59	0.36	0.3367	4.1333	1.27	-1.702477218	3.63E-12	2.07E-10	-1.915435705	0.001868662	0.013063452	Harbinger transposase-derived protein [Arabidopsis suecica]	-	-	-	-
MSTRG.4639	--	1.55	1.79	1.62	1.1	1.26	1.43	5.42	2.38	3.75	3.85	1.2633	1.6533	0.388142272	0.000229966	0.002911337	1.219480826	0.000128966	0.001347363	BnaC06g13970D [Brassica napus]	-	-	-	-
MSTRG.46396	RE1	4.61	5.51	6.12	2.92	2.41	2.66	8.3	7.25	6.94	7.4967	2.6633	5.4133	1.023284224	8.86E-14	6.34E-12	0.469732029	0.00301469	0.019368772	Integrase catalytic core [Arabidopsis suecica]	-	GO:0043231//intracellular membrane-bounded organelle	-	-
MSTRG.46427	--	1.66	2.97	3.36	5.14	5.33	5.63	0	0.68	0.23	0.3033	5.3667	2.6633	-1.01079328	0.584752292	0.925384458	-3.134257053	2.31E-05	0.000302668	hypothetical protein F2Q69_00028631 [Brassica cretica]	-	-	-	-
MSTRG.46447	RBK1	7.67	7.27	9.16	9.35	9.71	10.52	1.78	4.35	4.95	3.6933	9.86	8.0333	-0.295588906	0.088461465	0.34430481	-1.121075265	0.003685671	0.0228045	protein SHORT HYPOCOTYL IN WHITE LIGHT 1 [Brassica rapa]	-	GO:0043231//intracellular membrane-bounded organelle;GO:0044444//cytoplasmic part	GO:0004672//protein kinase activity;GO:0019899//enzyme binding;GO:0032550//purine ribonucleoside binding	GO:0006464//cellular protein modification process;GO:0006796//phosphate-containing compound metabolic process;GO:0009610//response to symbiotic fungus;GO:0009723//response to ethylene;GO:0019932//second-messenger-mediated signaling;GO:0045087//innate immune response
MSTRG.46512	--	1.2	1.89	1.54	1.82	0.93	1.72	0	0.46	0.22	0.2267	1.49	1.5433	0.050737362	0.215729431	0.591942431	-2.767405542	0.002722585	0.01779366	hypothetical protein HID58_083686, partial [Brassica napus]	-	-	-	-
MSTRG.46606	--	5.3	3.97	4.01	2.43	1.67	1.83	3.85	4.89	6.38	5.04	1.9767	4.4267	1.163151137	1.04E-08	3.42E-07	0.187202993	0.328278905	0.635209934	BnaA02g12610D [Brassica napus]	-	-	-	-
MSTRG.46626	JAL33	0	0	0	0	0	0	2.48	0.21	1.43	1.3733	0	0	0	1	1	10.42346612	0.000127326	0.001331812	PYK10-binding protein 1 [Brassica rapa]	-	GO:0005911//cell-cell junction;GO:0009536//plastid	GO:0005515//protein binding;GO:0046914//transition metal ion binding	GO:0000097//sulfur amino acid biosynthetic process;GO:0001101//response to acid chemical;GO:0006972//hyperosmotic response;GO:0006996//organelle organization;GO:0009692//ethylene metabolic process;GO:0009755//hormone-mediated signaling pathway;GO:0014070//response to organic cyclic compound;GO:0022610//biological adhesion;GO:0044267//cellular protein metabolic process;GO:0050790//regulation of ca…
MSTRG.46641	--	4.77	5.15	5.58	8.2	12.8	11.96	0	1.9	0.55	0.8167	10.9867	5.1667	-1.088448027	0.04818314	0.226218135	-2.661414561	0.001350945	0.009963835	hypothetical protein HID58_046753 [Brassica napus]	-	-	-	-
MSTRG.46699	SRO2	1.21	1.19	1.15	1.19	1.68	2.4	0.14	0.42	0.55	0.37	1.7567	1.1833	-0.569983937	0.889949274	0.994882214	-1.677259348	0.001468952	0.010675887	PREDICTED: probable inactive poly [ADP-ribose] polymerase SRO2 isoform X2 [Raphanus sativus]	-	GO:0043231//intracellular membrane-bounded organelle	-	GO:0009404//toxin metabolic process;GO:0014070//response to organic cyclic compound
MSTRG.46742	--	0.55	0.44	1.02	0.45	0.85	0.51	0	0.14	0	0.0467	0.6033	0.67	0.151205804	0.258740515	0.654667542	-3.843696769	0.008121521	0.04334931	BnaCnng23990D [Brassica napus]	-	-	-	-
MSTRG.46761	--	1.33	1.27	1.55	1.37	1.41	1.65	5.22	1.94	3.31	3.49	1.4767	1.3833	-0.094195362	0.169512906	0.517639595	1.335078201	0.000858193	0.006783673	BnaC06g41820D [Brassica napus]	-	-	-	-
MSTRG.46798	--	1.03	2.88	0.96	0	0	0	1.15	0	1.89	1.0133	0	1.6233	10.66474356	1.55E-10	6.99E-09	-0.679850449	0.521365549	0.812997281	BnaA08g03160D [Brassica napus]	-	-	-	-
MSTRG.46813	CPN60B3	0.68	0.52	0.69	0.88	1.92	1.39	0.08	0.15	0.17	0.1333	1.3967	0.63	-1.148564009	0.242192238	0.631606958	-2.240314329	0.004061696	0.024649119	BnaA03g48060D [Brassica napus]	ko03018//RNA degradation	-	-	-
MSTRG.46817	--	1.4	1.13	1.17	3.18	4.72	4.42	0.08	0.84	0.48	0.4667	4.1067	1.2333	-1.73540508	4.39E-06	8.46E-05	-1.402098444	0.043153833	0.158474515	PREDICTED: dnaJ protein ERDJ2A [Raphanus sativus]	-	-	-	-
MSTRG.46926	HVA22C	0.89	1.18	0.62	2.86	2.42	2.11	0	0.15	0.11	0.0867	2.4633	0.8967	-1.457968192	0.060756376	0.266345194	-3.371022644	0.001431516	0.010456663	PREDICTED: HVA22-like protein c [Brassica oleracea var. oleracea] [Brassica oleracea]	-	GO:0005911//cell-cell junction;GO:0031224//intrinsic component of membrane;GO:0043231//intracellular membrane-bounded organelle	-	GO:0003006//developmental process involved in reproduction;GO:0006972//hyperosmotic response;GO:0009414//response to water deprivation;GO:0009617//response to bacterium
MSTRG.46948	GDPD1	0.27	0.5	0.46	1.34	1.74	1.42	0	0.11	0	0.0367	1.5	0.41	-1.871266686	0.00628122	0.047142847	-3.483082887	0.010479232	0.053200115	glycerophosphodiester phosphodiesterase GDPD1, chloroplastic [Brassica rapa]	-	GO:0009536//plastid	GO:0008081//phosphoric diester hydrolase activity;GO:0046872//metal ion binding	GO:0010038//response to metal ion;GO:0019400//alditol metabolic process;GO:0072501//cellular divalent inorganic anion homeostasis
MSTRG.46974	--	3	4.64	5.75	3.13	3.18	4.44	1.04	1.44	1.36	1.28	3.5833	4.4633	0.316819301	0.000999014	0.010278474	-1.801977745	7.88E-07	1.50E-05	unnamed protein product [Brassica napus]	-	-	-	-
MSTRG.47005	CYP71B2	0.46	0.42	0.37	0	0	0.02	3.18	2.23	3.04	2.8167	0.0067	0.4167	5.965784285	5.69E-06	0.000106781	2.757023247	6.18E-14	4.12E-12	PREDICTED: cytochrome P450 71B2-like isoform X1 [Brassica oleracea var. oleracea] [Brassica oleracea]	-	-	-	-
MSTRG.47098	--	0	0	0	0	0	0	1.15	0.89	0.97	1.0033	0	0	0	1	1	9.970585271	0.003024606	0.019417729	hypothetical protein F2Q69_00017039 [Brassica cretica]	-	-	-	-
MSTRG.47211	AIL1	0.47	0.67	0.55	0.24	0.29	0.3	1.19	1.43	1.31	1.31	0.2767	0.5633	1.025840005	0.000758585	0.008154927	1.217506066	0.000318703	0.002932212	PREDICTED: AP2-like ethylene-responsive transcription factor AIL1 [Brassica oleracea var. oleracea] [Brassica oleracea]	-	GO:0043231//intracellular membrane-bounded organelle	GO:0001071//nucleic acid binding transcription factor activity	GO:0010468//regulation of gene expression;GO:0034645//cellular macromolecule biosynthetic process;GO:0044699//single-organism process
MSTRG.47252	--	0.66	0.87	0.73	0.56	0.61	0.62	1.89	1.7	1.56	1.7167	0.5967	0.7533	0.336363185	0.03084349	0.162634731	1.18824966	0.000257833	0.002447637	PREDICTED: LOW QUALITY PROTEIN: zinc finger protein AZF1 [Brassica oleracea var. oleracea] [Brassica oleracea]	-	GO:0043231//intracellular membrane-bounded organelle	GO:0000975//regulatory region DNA binding;GO:0001071//nucleic acid binding transcription factor activity;GO:0046914//transition metal ion binding	GO:0006355//regulation of transcription, DNA-templated;GO:0006972//hyperosmotic response;GO:0010243//response to organonitrogen compound
MSTRG.47253	--	13.36	11.99	16.45	12.07	12.01	14.49	2.48	4.55	3.34	3.4567	12.8567	13.9333	0.116023796	4.64E-05	0.000700578	-2.011087048	9.26E-12	4.47E-10	PREDICTED: chaperone protein ClpB1-like [Raphanus sativus]	-	-	-	-
MSTRG.47278	MYB54	0	0.04	0.04	0	0.12	0	0.17	0.5	1.38	0.6833	0.04	0.0267	-0.584962501	0.970532137	0.994882214	4.6794801	0.000389754	0.003479843	PREDICTED: transcription factor WER-like [Brassica oleracea var. oleracea] [Brassica oleracea]	ko04626//Plant-pathogen interaction	GO:0043231//intracellular membrane-bounded organelle	GO:0000975//regulatory region DNA binding;GO:0001071//nucleic acid binding transcription factor activity	GO:0001101//response to acid chemical;GO:0009834//plant-type secondary cell wall biogenesis;GO:0010468//regulation of gene expression
MSTRG.47395	--	1.13	2.21	1.78	5.76	7.31	7.11	0.26	0.82	0.8	0.6267	6.7267	1.7067	-1.978710459	3.48E-08	1.03E-06	-1.445411148	0.006903566	0.037974808	PREDICTED: uncharacterized protein LOC108832889 [Raphanus sativus]	-	-	-	-
MSTRG.47515	--	0.84	0.76	0.49	1.36	0.54	0.86	0	0	0.18	0.06	0.92	0.6967	-0.401165325	0.824200966	0.97358954	-3.537434131	0.009312757	0.048448755	hypothetical protein HID58_091468 [Brassica napus]	-	-	-	-
MSTRG.47516	--	0.74	0.78	0.96	2.34	0.9	1.67	0.09	0.13	0.08	0.1	1.6367	0.8267	-0.985382904	0.514728695	0.888851295	-3.047305715	0.009405854	0.048807874	hypothetical protein HID58_091468 [Brassica napus]	-	-	-	-
MSTRG.47524	--	1.09	1.68	1.43	3.97	0	1.61	0.39	0.57	0.28	0.4133	1.86	1.4	-0.409875794	0.961402999	0.994882214	-1.760049207	0.004245129	0.025550575	hypothetical protein F2Q69_00040845 [Brassica cretica]	-	-	-	-
MSTRG.47611	--	0.2	0.49	0.85	1.36	2.15	2.24	0.04	0.05	0.02	0.0367	1.9167	0.5133	-1.900631605	0.000330915	0.003992933	-3.807354922	8.93E-05	0.000984549	BnaC07g15840D [Brassica napus]	-	-	-	-
MSTRG.47612	--	1.06	0.87	1.27	1.07	0.6	0.85	0	0.05	0	0.0167	0.84	1.0667	0.344648171	0.010917053	0.073179125	-6	5.19E-11	2.21E-09	BnaC07g15840D [Brassica napus]	-	-	-	-
MSTRG.47725	RPS6	1	1.13	1.35	0.72	2.51	1.97	0.08	0.26	0.16	0.1667	1.7333	1.16	-0.579424317	0.852478076	0.981845721	-2.799087306	1.14E-07	2.64E-06	30S ribosomal protein S6 alpha, chloroplastic isoform X1 [Coffea arabica]	ko03010//Ribosome	GO:0030529//intracellular ribonucleoprotein complex;GO:0044434//chloroplast part	GO:0005198//structural molecule activity;GO:0008135//translation factor activity, RNA binding	GO:0009668//plastid membrane organization;GO:0010467//gene expression;GO:0022613//ribonucleoprotein complex biogenesis;GO:0034645//cellular macromolecule biosynthetic process
MSTRG.47732	GH3.10	0.64	0.62	0.87	1.05	1.55	1.17	0.12	0.13	0.12	0.1233	1.2567	0.71	-0.823711093	0.53024265	0.895769484	-2.525256255	1.78E-05	0.000240538	indole-3-acetic acid-amido synthetase GH3.10-like [Brassica napus]	ko04075//Plant hormone signal transduction	-	-	GO:0001101//response to acid chemical;GO:0006952//defense response;GO:0006970//response to osmotic stress
MSTRG.47794	--	0.08	0.11	0.11	0.39	0.44	0.48	0	0.03	0	0.01	0.4367	0.1	-2.126532406	0.003888624	0.031966602	-3.321928095	0.034357181	0.133773454	BnaC07g15840D [Brassica napus]	-	-	-	-
MSTRG.47800	--	0.54	0.3	0.83	0.51	0.26	0.73	0.08	0.07	0.07	0.0733	0.5	0.5567	0.154885602	0.256901435	0.652101316	-2.924272674	0.001923638	0.013369781	hypothetical protein F2Q69_00022699 [Brassica cretica]	-	-	-	-
MSTRG.47827	--	0.99	1.14	1	1.22	2.97	2.61	0.22	0.18	0.14	0.18	2.2667	1.0433	-1.119372089	0.22612543	0.608763666	-2.535131345	0.00076425	0.006144381	BnaC09g43340D [Brassica napus]	-	-	-	-
MSTRG.47875	--	0.05	0.3	0.29	0	0	0.08	2.8	1.17	1.31	1.76	0.0267	0.2133	3	0.035409256	0.180220056	3.044394119	1.78E-05	0.000241124	hypothetical protein DY000_02016945 [Brassica cretica]	-	-	-	-
MSTRG.47954	At1g32220	4.41	3.66	4.19	3.5	6.1	6.39	1.72	2.09	1.91	1.9067	5.33	4.0867	-0.38321096	0.405182554	0.810941726	-1.099871927	0.00251945	0.016714683	NAD(P)-binding domain containing protein [Trema orientale]	-	GO:0016020//membrane	-	GO:0032958//inositol phosphate biosynthetic process
MSTRG.48019	--	49.69	42.17	48.04	42.01	43.41	47.56	310.77	155.64	220.76	229.0567	44.3267	46.6333	0.07318668	3.99E-08	1.17E-06	2.296271091	1.35E-20	2.10E-18	hypothetical protein F2Q68_00001654 [Brassica cretica]	-	-	-	-
MSTRG.48081	NPF5.2	7.7	8.38	7.38	3.32	1.51	2.44	1.24	4.77	1.88	2.63	2.4233	7.82	1.690175744	1.02E-13	7.25E-12	-1.572105808	0.001270339	0.009462868	Transposon En/Spm-like [Arabidopsis thaliana x Arabidopsis arenosa]	-	-	-	-
MSTRG.48090	--	1.86	3.71	3.84	4.78	8.69	7.61	0.31	0.44	0.27	0.34	7.0267	3.1367	-1.163608239	0.019015655	0.113009481	-3.205625571	9.56E-19	1.22E-16	GAG-pre-integrase domain, partial [Arabidopsis suecica]	-	-	-	-
MSTRG.48102	FLS2	0.17	0.1	0.15	0.16	0.3	0.44	0	0	0	0	0.3	0.14	-1.099535674	0.467788951	0.861264554	-7.129283017	0.000197244	0.00194701	flagellin-sensing 2-like protein, partial [Sinapis alba]	ko04626//Plant-pathogen interaction;ko04016//MAPK signaling pathway - plant	GO:0016020//membrane;GO:0044464//cell part	GO:0016301//kinase activity	GO:0009987//cellular process;GO:0044699//single-organism process;GO:0050896//response to stimulus
MSTRG.48180	--	7.61	9.69	8.8	13.41	23.19	22.52	1.61	1.69	1.93	1.7433	19.7067	8.7	-1.179596463	0.005590818	0.04286119	-2.319166955	1.21E-14	8.94E-13	BnaC09g43340D [Brassica napus]	-	-	-	-
MSTRG.48181	--	3.18	4.02	4.23	3.77	3.86	3.95	0.51	1.18	0.88	0.8567	3.86	3.81	-0.01880985	0.003208023	0.027341861	-2.152985139	2.14E-08	5.71E-07	unnamed protein product [Brassica napus]	-	-	-	-
MSTRG.48219	--	4.63	4.13	3.15	1.74	1.19	0.87	9.52	10.85	10.99	10.4533	1.2667	3.97	1.64810209	1.96E-10	8.70E-09	1.396752146	8.30E-10	2.93E-08	DEK C-terminal [Arabidopsis suecica]	-	GO:0044424//intracellular part	-	GO:0009409//response to cold
MSTRG.4822	--	0.09	0.23	0.12	0.97	2.66	1.41	0.08	0	0	0.0267	1.68	0.1467	-3.517848305	0.000311214	0.003783663	-2.459431619	0.090659517	0.271046354	BnaA04g27020D [Brassica napus]	-	-	-	-
MSTRG.48269	At4g18490	1.5	1.46	1.08	1.04	0.64	0.43	4.85	2.68	4.1	3.8767	0.7033	1.3467	0.937112294	0.0001293	0.001753559	1.525423899	1.97E-07	4.32E-06	PREDICTED: GTP-binding protein OBGC, chloroplastic isoform X1 [Fragaria vesca subsp. vesca] [Fragaria vesca]	-	-	-	-
MSTRG.48292	At4g11580	0.67	0.42	1.03	0.05	0	0.06	0	0.91	0.48	0.4633	0.0367	0.7067	4.268488836	2.73E-05	0.000435844	-0.608979382	0.649163084	0.890089473	BnaCnng08450D [Brassica napus]	-	-	-	-
MSTRG.48322	--	0.71	1.33	0.53	1.49	2.84	1.46	0	0.05	0	0.0167	1.93	0.8567	-1.171794989	0.296719639	0.702313994	-5.683696454	8.14E-05	0.000908006	hypothetical protein HID58_057080 [Brassica napus]	-	-	-	-
MSTRG.48341	LCR53	1.31	1.06	1.65	0.82	0.71	0.24	0.09	0.08	0.37	0.18	0.59	1.34	1.183446141	0.006870417	0.050659115	-2.896164189	0.001681729	0.011955318	BnaCnng13530D [Brassica napus]	-	-	-	GO:0050896//response to stimulus;GO:0051704//multi-organism process
MSTRG.48395	GRF2	13.15	13.52	15.78	20.68	26.68	27.55	3.62	7.35	8.59	6.52	24.97	14.15	-0.819393768	0.056877521	0.254521466	-1.117858183	0.000275702	0.002591137	protein tesmin/TSO1-like CXC 7 isoform X2 [Brassica napus]	-	GO:0012505//endomembrane system;GO:0031090//organelle membrane;GO:0043231//intracellular membrane-bounded organelle;GO:0044444//cytoplasmic part	GO:0016817//hydrolase activity, acting on acid anhydrides;GO:0051219//phosphoprotein binding	GO:0001101//response to acid chemical;GO:0003006//developmental process involved in reproduction;GO:0009887//organ morphogenesis;GO:0010468//regulation of gene expression;GO:0034645//cellular macromolecule biosynthetic process;GO:0043401//steroid hormone mediated signaling pathway;GO:0048827//phyllome development
MSTRG.48463	--	1.44	1.98	2.26	2.88	2.94	3.36	0.05	0.41	0.29	0.25	3.06	1.8933	-0.692603224	0.722300801	0.955677938	-2.920928429	6.23E-06	9.49E-05	cyclin-B2-1-like [Brassica napus]	-	-	-	-
MSTRG.48502	--	1.28	1.89	1.67	4.53	6.56	4.28	0.53	0.49	0.9	0.64	5.1233	1.6133	-1.667038212	0.002594846	0.022875677	-1.333900737	0.028100191	0.114815032	hypothetical protein F2Q69_00012909 [Brassica cretica]	-	-	-	-
MSTRG.48516	LSG1-2	4.88	5.53	5.26	6.66	5.86	5.69	1.69	2.94	2.8	2.4767	6.07	5.2233	-0.216725743	0.04938521	0.230377992	-1.076571064	0.000289059	0.002695854	GTPase LSG1-2-like [Brassica napus]	ko03008//Ribosome biogenesis in eukaryotes	GO:0043231//intracellular membrane-bounded organelle	GO:0003824//catalytic activity;GO:0005488//binding	GO:0000725//recombinational repair;GO:0006260//DNA replication;GO:0006305//DNA alkylation;GO:0016458//gene silencing;GO:0034968//histone lysine methylation;GO:0048229//gametophyte development;GO:0048580//regulation of post-embryonic development;GO:0051052//regulation of DNA metabolic process;GO:1901990//regulation of mitotic cell cycle phase transition;GO:1902410//mitotic cytokinetic process
MSTRG.48546	CYP72A15	17.7	18.88	22.78	19.39	29.44	28.71	1.53	7.26	6.36	5.05	25.8467	19.7867	-0.385449643	0.08826929	0.343908617	-1.970173298	1.14E-05	0.000163177	PREDICTED: cytochrome P450 72A15-like [Brassica oleracea var. oleracea] [Brassica oleracea]	-	GO:0031224//intrinsic component of membrane;GO:0043231//intracellular membrane-bounded organelle	GO:0016491//oxidoreductase activity;GO:0046906//tetrapyrrole binding;GO:0046914//transition metal ion binding	GO:0030001//metal ion transport;GO:0044710//single-organism metabolic process
MSTRG.48585	--	0.88	0.94	1.05	3.04	3.34	3.01	0	0.56	0.36	0.3067	3.13	0.9567	-1.710074421	0.00015102	0.002011451	-1.641344971	0.034839407	0.135132131	ORF-c [Brassica rapa]	-	-	-	-
MSTRG.48588	Os03g0733400	0.09	0.41	0.34	0.46	0.88	0.55	0.06	0.05	0.03	0.0467	0.63	0.28	-1.169925001	0.312703206	0.719767889	-2.584962501	0.009513152	0.049216107	zinc finger BED domain-containing protein RICESLEEPER 2-like [Brassica rapa]	-	-	-	-
MSTRG.48609	--	0.21	0.35	0.42	1.36	2.97	0.82	0.09	0	0.3	0.13	1.7167	0.3267	-2.393718778	0.004072227	0.03316703	-1.329307625	0.278197884	0.574295529	hypothetical protein HID58_084593 [Brassica napus]	-	-	-	-
MSTRG.48616	PIF6	20.89	16.11	20.63	9.89	7.77	9.31	11.84	20.23	15.05	15.7067	8.99	19.21	1.095464498	3.72E-20	6.65E-18	-0.290480481	0.450166134	0.75751428	transcription factor PIF6 isoform X3 [Brassica rapa]	-	GO:0043231//intracellular membrane-bounded organelle	GO:0001071//nucleic acid binding transcription factor activity;GO:0005515//protein binding	GO:0007165//signal transduction;GO:0009628//response to abiotic stimulus;GO:0010087//phloem or xylem histogenesis;GO:0010467//gene expression;GO:0019222//regulation of metabolic process;GO:0034645//cellular macromolecule biosynthetic process
MSTRG.48731	ddx11	1.2	0.8	1.46	0.02	0.08	0.1	2.15	3.34	4.42	3.3033	0.0667	1.1533	4.112700133	5.11E-25	1.60E-22	1.51811302	1.69E-07	3.76E-06	PREDICTED: probable ATP-dependent RNA helicase DDX11 [Brassica oleracea var. oleracea] [Brassica oleracea]	-	GO:0043231//intracellular membrane-bounded organelle	GO:0003678//DNA helicase activity;GO:0032550//purine ribonucleoside binding	GO:0000723//telomere maintenance;GO:0006260//DNA replication;GO:0010212//response to ionizing radiation;GO:0032844//regulation of homeostatic process;GO:0033043//regulation of organelle organization;GO:0070192//chromosome organization involved in meiotic cell cycle
MSTRG.48828	--	0.46	1.19	1.01	2.83	3.65	3.32	0	0	0	0	3.2667	0.8867	-1.881355504	0.011036799	0.073800477	-9.79224803	0.000374244	0.003360333	BnaA05g14090D [Brassica napus]	-	-	-	-
MSTRG.4884	OlnB1	4.38	3.35	2.56	0.64	0.9	1.29	1.59	2.24	1.88	1.9033	0.9433	3.43	1.862369024	2.03E-09	7.63E-08	-0.849680332	0.056191308	0.192656262	oleosin-B1 [Brassica rapa]	-	GO:0005811//lipid particle;GO:0031224//intrinsic component of membrane;GO:0043231//intracellular membrane-bounded organelle;GO:0044420//extracellular matrix component	GO:0005488//binding	GO:0000003//reproduction;GO:0000904//cell morphogenesis involved in differentiation;GO:0006833//water transport;GO:0008037//cell recognition;GO:0009664//plant-type cell wall organization;GO:0022414//reproductive process;GO:0051235//maintenance of location
MSTRG.48913	--	2.18	1.9	1.66	1.48	1.7	1.89	6.42	4.6	5	5.34	1.69	1.9133	0.17906499	0.013918305	0.088602129	1.480751506	1.71E-07	3.81E-06	-	-	-	-	-
MSTRG.48922	--	0.61	1.18	0.61	3.44	1.35	2.02	0.13	0.12	0.11	0.12	2.27	0.8	-1.504620392	0.100970099	0.374746175	-2.736965594	0.004624359	0.02742607	glutathione S-transferase T3-like [Brassica napus]	-	-	-	-
MSTRG.48951	--	4.46	8.4	6.23	2.63	5.99	5.5	0.29	0.6	0.98	0.6233	4.7067	6.3633	0.435077014	0.001396082	0.013614167	-3.351706928	1.68E-11	7.73E-10	unnamed protein product [Brassica napus]	-	-	-	-
MSTRG.48970	--	0.36	1.36	0.63	1.15	2.38	1.32	0	0.07	0.1	0.0567	1.6167	0.7833	-1.045323991	0.498047175	0.879687467	-3.789054105	0.006027901	0.034002098	uncharacterized protein LOC106359680 [Brassica napus]	-	-	-	-
MSTRG.48989	--	0.43	0.25	0.27	0.02	0.03	0.06	2.43	2.06	3.41	2.6333	0.0367	0.3167	3.11042399	5.21E-06	9.84E-05	3.055853235	1.21E-17	1.32E-15	BnaC03g65670D [Brassica napus]	-	-	GO:0046914//transition metal ion binding;GO:0097159//organic cyclic compound binding	-
MSTRG.49003	At4g15970	0.11	0.17	0.23	1.28	1.48	0.39	0	0.04	0	0.0133	1.05	0.17	-2.626782676	0.003659905	0.03038018	-3.672425342	0.037441348	0.142589267	Nucleotide-diphospho-sugar transferase [Arabidopsis thaliana x Arabidopsis arenosa]	-	GO:0044424//intracellular part	-	-
MSTRG.49016	MSD1	2.31	2.71	3.3	4.16	5	5.91	0.85	1.26	1.01	1.04	5.0233	2.7733	-0.857023983	0.204823116	0.575628377	-1.415037499	1.73E-05	0.000235177	superoxide dismutase Mn [Brassica oleracea var. botrytis] [Brassica oleracea]	ko04146//Peroxisome	GO:0031224//intrinsic component of membrane;GO:0042170//plastid membrane;GO:0044429//mitochondrial part	GO:0009975//cyclase activity;GO:0016209//antioxidant activity;GO:0016491//oxidoreductase activity;GO:0046914//transition metal ion binding	GO:0003006//developmental process involved in reproduction;GO:0006006//glucose metabolic process;GO:0006090//pyruvate metabolic process;GO:0006801//superoxide metabolic process;GO:0006970//response to osmotic stress;GO:0006996//organelle organization;GO:0009617//response to bacterium;GO:0009886//post-embryonic morphogenesis;GO:0010038//response to metal ion;GO:0016117//carotenoid biosynthetic pro…
MSTRG.49022	--	0.11	0.11	0.15	0.54	0.48	0.9	0	0.03	0	0.01	0.64	0.1233	-2.375509135	0.000221009	0.002810982	-3.624490865	0.010832742	0.054641819	Retrotransposon gag domain [Arabidopsis suecica]	-	-	-	-
MSTRG.49023	--	0	0.04	0.04	0.45	0.49	0.53	0	0.07	0	0.0233	0.49	0.0267	-4.199672345	0.000421353	0.004916906	-0.192645078	0.955947593	0.984062148	BnaA07g03900D [Brassica napus]	-	-	-	-
MSTRG.49029	--	0.25	0.46	0.16	0.61	0.87	1.67	0.04	0.08	0	0.04	1.05	0.29	-1.856264523	0.016036568	0.099028892	-2.857980995	0.003613693	0.022434737	BnaA07g03900D [Brassica napus]	-	-	-	-
MSTRG.49031	--	2.06	2.49	2.42	0.7	0.65	0.45	2.39	1.51	3.51	2.47	0.6	2.3233	1.95316175	7.87E-07	1.78E-05	0.088314886	0.689497857	0.904073785	-	-	-	-	-
MSTRG.49032	--	1.66	1.04	2.32	2.07	2.13	2.09	11.37	4.73	7.55	7.8833	2.0967	1.6733	-0.325372653	0.516772946	0.888851295	2.236080914	5.83E-08	1.43E-06	BnaCnng31310D [Brassica napus]	-	-	-	-
MSTRG.49101	--	13.78	18.32	18.32	6.79	12.13	8.37	3.21	8.42	8.17	6.6	9.0967	16.8067	0.885623724	4.60E-12	2.57E-10	-1.348495688	0.00034683	0.003151394	hypothetical protein HID58_089696 [Brassica napus]	-	-	-	-
MSTRG.49132	MYB118	4.73	6	4.87	8.76	12.43	11.34	0.06	0.4	0.37	0.2767	10.8433	5.2	-1.060224793	0.032103764	0.16751018	-4.232290882	4.19E-15	3.28E-13	transcription factor MYB118-like isoform X1 [Brassica napus]	ko04626//Plant-pathogen interaction	-	-	-
MSTRG.49221	TT10	125.05	160.47	142.42	446.66	439.6	417.63	10.74	81.16	40.7	44.2	434.63	142.6467	-1.607341724	3.50E-16	3.61E-14	-1.69032776	0.036881939	0.141007537	PREDICTED: laccase-15 [Brassica oleracea var. oleracea] [Brassica oleracea]	-	GO:0005576//extracellular region	GO:0016491//oxidoreductase activity	GO:0009699//phenylpropanoid biosynthetic process;GO:0009808//lignin metabolic process
MSTRG.49222	TT10	4.44	2.84	3.73	6.31	9.2	8.96	0.26	1.84	0.7	0.9333	8.1567	3.67	-1.152199633	0.001573276	0.015070969	-1.975315737	0.003028106	0.019435409	PREDICTED: laccase-15 [Brassica oleracea var. oleracea] [Brassica oleracea]	-	-	-	GO:0009698//phenylpropanoid metabolic process
MSTRG.49507	--	0.56	0.51	0.57	0.75	2.87	1.4	0	0	0.06	0.02	1.6733	0.5467	-1.613991549	0.13189991	0.445652247	-4.772589504	0.004526379	0.026964278	hypothetical protein F2Q69_00012909 [Brassica cretica]	-	-	-	-
MSTRG.49534	At1g18030	1.44	1.15	1.61	1.63	2.9	2.59	0.07	0.26	0.3	0.21	2.3733	1.4	-0.761487913	0.709322491	0.95472016	-2.736965594	0.000375442	0.003369565	unnamed protein product [Brassica napus]	-	-	-	-
MSTRG.49593	CYP71B11	0.4	0.14	0.39	0.31	0.35	0.37	5.09	1.28	3.22	3.1967	0.3433	0.31	-0.147341716	0.451173456	0.848832096	3.366228194	1.08E-09	3.74E-08	PREDICTED: cytochrome P450 71B11-like [Brassica oleracea var. oleracea] [Brassica oleracea]	-	-	-	-
MSTRG.49696	--	11.19	15.18	14.96	25.24	38.05	41.36	0.25	3.81	1.41	1.8233	34.8833	13.7767	-1.340311043	7.19E-06	0.000131595	-2.917576626	0.003224412	0.020448165	Harbinger transposase-derived protein [Arabidopsis suecica]	-	-	-	-
MSTRG.4974	PME51	0	0.03	0	0.32	0.28	0.33	0	0	0.06	0.02	0.31	0.01	-4.95419631	0.004934903	0.038713892	1	0.829519023	0.931138542	probable pectinesterase/pectinesterase inhibitor 51 [Brassica rapa]	-	GO:0005618//cell wall;GO:0009536//plastid	GO:0052689//carboxylic ester hydrolase activity	GO:0000272//polysaccharide catabolic process;GO:0009892//negative regulation of metabolic process;GO:0048509//regulation of meristem development;GO:0071555//cell wall organization
MSTRG.49750	NRPB4	2.43	2.13	2.66	2.42	2.38	2.08	0.29	1.26	1.19	0.9133	2.2933	2.4067	0.069590272	0.007973953	0.05710852	-1.397822944	0.006230464	0.034929376	BnaC02g19240D [Brassica napus]	-	GO:0005634//nucleus	GO:0003824//catalytic activity	GO:0006351//transcription, DNA-templated
MSTRG.49797	--	0.16	0.05	0.34	0.04	0	0.03	5.39	3.17	5.67	4.7433	0.0233	0.1833	2.974004791	0.023732305	0.133302951	4.693360233	1.04E-15	8.83E-14	late embryogenesis abundant protein [Arabis alpina]	-	GO:0009536//plastid	-	-
MSTRG.49849	--	0.86	0.67	0.94	0.21	0.17	0.28	0.46	1.52	0.93	0.97	0.22	0.8233	1.903973112	3.74E-05	0.000579257	0.236508111	0.539027646	0.826210506	PREDICTED: polyadenylate-binding protein 2-like [Raphanus sativus]	-	-	-	-
MSTRG.49885	PDH-E1	75.99	83.38	84.35	103.98	100.68	100.93	20.04	34.05	30.19	28.0933	101.8633	81.24	-0.326372689	0.014185205	0.089852523	-1.531962426	5.22E-12	2.62E-10	PREDICTED: pyruvate dehydrogenase E1 component subunit alpha-3, chloroplastic [Brassica oleracea var. oleracea] [Brassica oleracea]	ko01100//Metabolic pathways;ko01110//Biosynthesis of secondary metabolites;ko01200//Carbon metabolism;ko00010//Glycolysis / Gluconeogenesis;ko00620//Pyruvate metabolism;ko00020//Citrate cycle (TCA cycle)	GO:0009526//plastid envelope;GO:0009532//plastid stroma	GO:0004738//pyruvate dehydrogenase activity	GO:0006090//pyruvate metabolic process
MSTRG.49916	MVP1	51.62	63.3	58.74	153.4	154.15	131.82	20.03	19.87	16.2	18.7	146.4567	57.8867	-1.339170878	6.27E-09	2.14E-07	-1.630192813	3.01E-16	2.72E-14	PREDICTED: inactive GDSL esterase/lipase-like protein 25 [Brassica oleracea var. oleracea] [Brassica oleracea]	-	GO:0005576//extracellular region;GO:0005774//vacuolar membrane;GO:0005840//ribosome;GO:0005911//cell-cell junction;GO:0009526//plastid envelope;GO:0042579//microbody	GO:0016788//hydrolase activity, acting on ester bonds	GO:0006796//phosphate-containing compound metabolic process;GO:0006886//intracellular protein transport;GO:0006950//response to stress;GO:0006996//organelle organization;GO:0009617//response to bacterium;GO:0019637//organophosphate metabolic process;GO:0019759//glycosinolate catabolic process;GO:0044238//primary metabolic process;GO:0044249//cellular biosynthetic process;GO:0044711//single-organi…
MSTRG.49919	--	2.38	2.35	1.61	8.9	25.14	14.24	2.43	1.66	1.84	1.9767	16.0933	2.1133	-2.928870931	7.75E-14	5.59E-12	-0.096450736	0.990894536	0.995059122	BnaCnng70510D [Brassica napus]	-	-	-	-
MSTRG.49940	ASP4	0.79	1.15	1.86	3.61	2.83	3.95	0.06	0.29	0.23	0.1933	3.4633	1.2667	-1.451124331	0.000370671	0.004403827	-2.711874613	6.68E-05	0.000765803	PREDICTED: aspartate aminotransferase, cytoplasmic isozyme 2-like [Brassica oleracea var. oleracea] [Brassica oleracea]	ko01100//Metabolic pathways;ko01110//Biosynthesis of secondary metabolites;ko01200//Carbon metabolism;ko01230//Biosynthesis of amino acids;ko00270//Cysteine and methionine metabolism;ko01210//2-Oxocarboxylic acid metabolism;ko00710//Carbon fixation in photosynthetic organisms;ko00330//Arginine and proline metabolism;ko00250//Alanine, aspartate and glutamate metabolism;ko00400//Phenylalanine, tyro…	GO:0005911//cell-cell junction;GO:0009536//plastid;GO:0030312//external encapsulating structure;GO:0031090//organelle membrane;GO:0042579//microbody	GO:0043168//anion binding;GO:0046914//transition metal ion binding;GO:0070546//L-phenylalanine aminotransferase activity	GO:0006511//ubiquitin-dependent protein catabolic process;GO:0009062//fatty acid catabolic process;GO:0009404//toxin metabolic process;GO:0009692//ethylene metabolic process;GO:0009725//response to hormone;GO:0010260//organ senescence;GO:0035966//response to topologically incorrect protein;GO:0043248//proteasome assembly;GO:0048588//developmental cell growth
MSTRG.49978	ECP63	4.04	3.13	3.97	2.11	2.85	3.99	12.74	7.04	10.55	10.11	2.9833	3.7133	0.315789645	0.00054053	0.006101256	1.444996265	2.22E-08	5.89E-07	PREDICTED: LOW QUALITY PROTEIN: embryonic protein DC-8 [Brassica oleracea var. oleracea] [Brassica oleracea]	-	GO:0044444//cytoplasmic part	-	GO:0003006//developmental process involved in reproduction
MSTRG.49986	At1g53240	9.08	11.06	11.23	20.23	24.79	21.61	9.5	7.79	9.71	9	22.21	10.4567	-1.086786364	7.27E-05	0.001048727	-0.216426122	0.525595759	0.816351299	PREDICTED: malate dehydrogenase 1, mitochondrial [Brassica oleracea var. oleracea] [Brassica oleracea]	ko01100//Metabolic pathways;ko01110//Biosynthesis of secondary metabolites;ko01200//Carbon metabolism;ko00270//Cysteine and methionine metabolism;ko00620//Pyruvate metabolism;ko00630//Glyoxylate and dicarboxylate metabolism;ko00710//Carbon fixation in photosynthetic organisms;ko00020//Citrate cycle (TCA cycle)	GO:0005576//extracellular region;GO:0009536//plastid;GO:0030312//external encapsulating structure;GO:0044429//mitochondrial part	GO:0016615//malate dehydrogenase activity;GO:0046914//transition metal ion binding	GO:0006006//glucose metabolic process;GO:0006090//pyruvate metabolic process;GO:0006101//citrate metabolic process;GO:0006970//response to osmotic stress;GO:0006996//organelle organization;GO:0009617//response to bacterium;GO:0010038//response to metal ion;GO:0042044//fluid transport;GO:0043094//cellular metabolic compound salvage;GO:0043648//dicarboxylic acid metabolic process
MSTRG.49992	VPS53	0.91	0.78	0.99	0.75	1.13	0.81	2.21	1.97	1.91	2.03	0.8967	0.8933	-0.005373172	0.085135265	0.336146506	1.184209227	2.32E-05	0.000303946	PREDICTED: vacuolar protein sorting-associated protein 53 A-like [Brassica oleracea var. oleracea] [Brassica oleracea]	-	GO:0031090//organelle membrane;GO:0043231//intracellular membrane-bounded organelle;GO:0043234//protein complex;GO:0044444//cytoplasmic part	GO:0005488//binding	GO:0007017//microtubule-based process;GO:0008104//protein localization;GO:0009408//response to heat;GO:0044802//single-organism membrane organization;GO:0048193//Golgi vesicle transport;GO:1902410//mitotic cytokinetic process
MSTRG.50005	At1g50280	0.86	0.94	0.92	0.87	0.58	0.56	0.03	0.1	0	0.0433	0.67	0.9067	0.43641115	0.012007241	0.078739253	-4.387023123	2.90E-07	6.14E-06	BTB/POZ domain-containing protein At1g50280-like [Brassica napus]	-	-	-	-
MSTRG.50047	--	2.05	1.97	2.15	3.38	5.93	5.14	0.39	0.74	0.33	0.4867	4.8167	2.0567	-1.227727098	0.001806437	0.016906765	-2.07930212	1.37E-07	3.11E-06	Harbinger transposase-derived protein [Arabidopsis thaliana x Arabidopsis arenosa]	-	-	-	-
MSTRG.50160	--	0.74	1.02	1.16	2.69	3.77	4.14	0.44	0.89	1.37	0.9	3.5333	0.9733	-1.860023991	0.000130125	0.001762987	-0.113008962	0.973165162	0.986486794	BnaC09g11400D [Brassica napus]	-	-	-	-
MSTRG.50206	TY3B-G	1.08	1.6	1.3	3.3	3.81	4.38	0.77	1.06	1.13	0.9867	3.83	1.3267	-1.529538462	2.17E-06	4.46E-05	-0.427171255	0.21681779	0.490212586	Pentatricopeptide repeat [Arabidopsis thaliana x Arabidopsis arenosa]	-	-	-	-
MSTRG.50245	--	1.92	1.73	2.05	1.28	0.77	1.91	0.59	0.94	0.74	0.7567	1.32	1.9	0.525461489	0.006407734	0.047907865	-1.328269622	0.003878691	0.023759125	BnaC03g76920D [Brassica napus]	-	-	-	-
MSTRG.50304	PCMP-H57	5.9	8.09	5.48	1.38	0.24	0.98	17.4	12.28	18.53	16.07	0.8667	6.49	2.904669356	5.63E-10	2.32E-08	1.308079546	1.23E-05	0.000174181	LOW QUALITY PROTEIN: pentatricopeptide repeat-containing protein At3g14330 [Arabidopsis lyrata subsp. lyrata] [Arabidopsis lyrata]	-	-	-	GO:0009451//RNA modification
MSTRG.50452	FLA17	1.32	2.17	1.96	2.57	3.21	2.93	0.56	1.13	0.59	0.76	2.9033	1.8167	-0.676416489	0.739029684	0.963853454	-1.257222405	0.005126407	0.029912364	PREDICTED: fasciclin-like arabinogalactan protein 17 [Brassica oleracea var. oleracea] [Brassica oleracea]	-	GO:0043231//intracellular membrane-bounded organelle	-	GO:0022610//biological adhesion
MSTRG.50485	--	6.68	7.01	5.66	11.19	18.31	17.95	0.58	2.08	1.59	1.4167	15.8167	6.45	-1.294074521	0.000161164	0.002129238	-2.18679882	0.000125511	0.001316133	Harbinger transposase-derived protein [Arabidopsis suecica]	-	-	-	-
MSTRG.50497	OlnB1	0.44	0.9	0.77	7.51	9.94	11.33	0	0	0.08	0.0267	9.5933	0.7033	-3.769751688	2.02E-24	5.89E-22	-4.721099189	0.000457369	0.003987206	oleosin-B1 isoform X2 [Brassica rapa]	-	GO:0005811//lipid particle;GO:0031224//intrinsic component of membrane;GO:0043231//intracellular membrane-bounded organelle	GO:0005488//binding	GO:0000003//reproduction;GO:0000904//cell morphogenesis involved in differentiation;GO:0009664//plant-type cell wall organization;GO:0051235//maintenance of location
MSTRG.50503	FH20	1.45	1.62	1.43	1.67	2.25	2.46	0.45	0.84	0.84	0.71	2.1267	1.5	-0.503631423	0.604131744	0.932788184	-1.079071571	0.00149359	0.010811233	PREDICTED: formin-like protein 20 [Brassica oleracea var. oleracea] [Brassica oleracea]	-	-	-	GO:0007015//actin filament organization
MSTRG.5061	--	1.5	0.97	0.88	1.68	2.44	2.66	0	0.09	0	0.03	2.26	1.1167	-1.017124178	0.428938887	0.829382507	-5.218092284	0.000437905	0.003842086	F-box protein At2g35280 [Brassica napus]	-	-	-	-
MSTRG.50656	At3g47200	1.48	1.55	1.99	1.88	2.17	1.91	0.5	0.75	0.65	0.6333	1.9867	1.6733	-0.247624967	0.095666395	0.362059419	-1.401687946	1.92E-05	0.000257083	UPF0481 protein At3g47200 [Arabidopsis lyrata subsp. lyrata] [Arabidopsis lyrata]	-	GO:0009536//plastid;GO:0031224//intrinsic component of membrane	-	GO:0046942//carboxylic acid transport
MSTRG.50669	ASP3	7.79	6.96	10.19	4.73	8.84	7.87	23.92	12.52	14.81	17.0833	7.1467	8.3133	0.218156559	0.003973583	0.032512434	1.039090539	0.00052896	0.004508441	PREDICTED: aspartate aminotransferase 3, chloroplastic [Brassica oleracea var. oleracea] [Brassica oleracea]	ko01100//Metabolic pathways;ko01110//Biosynthesis of secondary metabolites;ko01200//Carbon metabolism;ko01230//Biosynthesis of amino acids;ko00270//Cysteine and methionine metabolism;ko01210//2-Oxocarboxylic acid metabolism;ko00710//Carbon fixation in photosynthetic organisms;ko00330//Arginine and proline metabolism;ko00250//Alanine, aspartate and glutamate metabolism;ko00400//Phenylalanine, tyro…	GO:0009536//plastid;GO:0042579//microbody	GO:0043168//anion binding;GO:0070546//L-phenylalanine aminotransferase activity	GO:0006101//citrate metabolic process;GO:0006511//ubiquitin-dependent protein catabolic process;GO:0009062//fatty acid catabolic process;GO:0009064//glutamine family amino acid metabolic process;GO:0009066//aspartate family amino acid metabolic process;GO:0009078//pyruvate family amino acid metabolic process;GO:0009404//toxin metabolic process;GO:0009692//ethylene metabolic process;GO:0009725//re…
MSTRG.50681	--	0.32	0.5	0.18	0	0	0	2.49	2.69	1.97	2.3833	0	0.3333	8.380821784	4.48E-06	8.60E-05	2.837943242	6.29E-10	2.26E-08	Core-2/I-branching beta-1,6-N-acetylglucosaminyltransferase family protein [Arabidopsis thaliana]	-	GO:0031984//organelle subcompartment;GO:0043231//intracellular membrane-bounded organelle	GO:0008194//UDP-glycosyltransferase activity	-
MSTRG.5079	LCR62	78.57	111.42	119.06	79	106.34	92.03	11.76	15.77	14.9	14.1433	92.4567	103.0167	0.156028509	3.15E-08	9.44E-07	-2.864683681	4.77E-41	5.17E-38	low-molecular-weight cysteine-rich 61 [Arabidopsis thaliana]	-	-	-	-
MSTRG.50835	SIRP1	0.42	0.6	0.8	3.87	4.7	3.36	0.08	0.11	0.24	0.1433	3.9767	0.6067	-2.712583687	2.09E-09	7.84E-08	-2.081529885	0.011653225	0.057799849	E3 ubiquitin-protein ligase SIRP1 [Brassica napus]	-	-	-	-
MSTRG.50979	At5g16150	4.99	6.39	8.52	19.62	22.46	18.29	2.3	2.39	2.61	2.4333	20.1233	6.6333	-1.60106337	8.10E-09	2.71E-07	-1.446800062	1.15E-07	2.66E-06	PREDICTED: plastidic glucose transporter 4 [Brassica oleracea var. oleracea] [Brassica oleracea]	-	GO:0009528//plastid inner membrane;GO:0031224//intrinsic component of membrane	GO:0016491//oxidoreductase activity;GO:0022891//substrate-specific transmembrane transporter activity	GO:0006812//cation transport;GO:0044763//single-organism cellular process
MSTRG.50980	At5g16150	4	5.2	4.86	11.73	17.47	13.11	1.96	2.63	2.35	2.3133	14.1033	4.6867	-1.589402091	3.98E-06	7.74E-05	-1.018589026	0.004051579	0.024599049	PREDICTED: plastidic glucose transporter 4 [Brassica oleracea var. oleracea] [Brassica oleracea]	-	GO:0009528//plastid inner membrane;GO:0031224//intrinsic component of membrane	GO:0022891//substrate-specific transmembrane transporter activity	GO:0006812//cation transport;GO:0044763//single-organism cellular process
MSTRG.51012	--	6.68	14.09	9.65	11.57	20.47	10.83	0.27	1.25	1.45	0.99	14.29	10.14	-0.494948264	0.693795833	0.949966925	-3.356485317	1.63E-10	6.45E-09	unnamed protein product [Brassica napus]	-	-	-	-
MSTRG.5123	GH3.15	1.57	2.15	2.15	3.41	3.87	3.82	0.08	0.11	0.22	0.1367	3.7	1.9567	-0.919127268	0.0936816	0.357174437	-3.839664688	1.09E-16	1.06E-14	indole-3-acetic acid-amido synthetase GH3.17-like [Brassica napus]	ko04075//Plant hormone signal transduction	GO:0043231//intracellular membrane-bounded organelle	GO:0016881//acid-amino acid ligase activity	GO:0009725//response to hormone;GO:0016129//phytosteroid biosynthetic process;GO:0048878//chemical homeostasis
MSTRG.51396	--	3.95	3.72	5.51	4.79	3.87	5.6	1.61	1.89	2.25	1.9167	4.7533	4.3933	-0.113623611	0.069036174	0.291284395	-1.196716509	0.000203486	0.001999644	AT5g59960/mmn10_180 [Arabidopsis thaliana]	-	GO:0043231//intracellular membrane-bounded organelle	-	-
MSTRG.51537	--	0.16	0.11	0.22	1.57	1.71	0.77	0	0	0	0	1.35	0.1633	-3.047068254	0.000187123	0.002427918	-7.351675438	0.023521151	0.099898891	hypothetical protein F2Q69_00033493 [Brassica cretica]	-	-	-	-
MSTRG.51569	CYP71B10	1.89	1.22	2.93	0.47	0.15	1.22	9.25	5.78	7.24	7.4233	0.6133	2.0133	1.714842783	0.001840224	0.017179762	1.882481103	1.18E-06	2.15E-05	PREDICTED: cytochrome P450 71B10 [Brassica oleracea var. oleracea] [Brassica oleracea]	-	-	-	-
MSTRG.51570	CYP71B10	3.14	2.35	4.32	0.55	0.38	0.92	14.12	9.22	13.25	12.1967	0.6167	3.27	2.406727866	6.69E-14	4.87E-12	1.899124374	3.84E-13	2.28E-11	PREDICTED: cytochrome P450 71B10 [Brassica oleracea var. oleracea] [Brassica oleracea]	-	-	-	-
MSTRG.51869	FEY	0.05	0.09	0.06	0.99	2.51	2.16	0	0	0	0	1.8867	0.0667	-4.822730148	3.22E-11	1.61E-09	-6.058893689	0.075665747	0.238910938	PREDICTED: retinol dehydrogenase 11-like [Brassica oleracea var. oleracea] [Brassica oleracea]	-	-	GO:0016628//oxidoreductase activity, acting on the CH-CH group of donors, NAD or NADP as acceptor	GO:0044710//single-organism metabolic process
MSTRG.51955	HSP23.5	1.04	1.49	1.12	2.96	2.13	2.1	3.14	1.29	3.51	2.6467	2.3967	1.2167	-0.978095307	0.257467966	0.653027017	1.121242543	0.006443403	0.035934658	PREDICTED: LOW QUALITY PROTEIN: 23.5 kDa heat shock protein, mitochondrial-like [Brassica oleracea var. oleracea] [Brassica oleracea]	ko04141//Protein processing in endoplasmic reticulum	GO:0043231//intracellular membrane-bounded organelle	-	GO:0000302//response to reactive oxygen species;GO:0009642//response to light intensity;GO:0010038//response to metal ion;GO:0033554//cellular response to stress;GO:0044267//cellular protein metabolic process
MSTRG.51977	HTH	0.34	0.15	0.12	0.26	0.41	0.19	1.9	1.09	1.67	1.5533	0.2867	0.2033	-0.495527417	0.872820454	0.990884995	2.933448807	3.77E-09	1.19E-07	BnaC03g15770D [Brassica napus]	ko01100//Metabolic pathways;ko00260//Glycine, serine and threonine metabolism	GO:0009536//plastid	GO:0000166//nucleotide binding;GO:0016614//oxidoreductase activity, acting on CH-OH group of donors;GO:0016829//lyase activity	GO:0044710//single-organism metabolic process;GO:0048437//floral organ development
MSTRG.52040	--	0.85	0.57	0.56	0.06	0	0.17	0.66	0.61	1.6	0.9567	0.0767	0.66	3.105794664	0.001114512	0.011285778	0.535550307	0.388879014	0.697619983	unnamed protein product [Brassica napus]	-	-	-	-
MSTRG.52080	--	1.07	0.95	0.47	2.32	2.24	3.31	0	0.04	0	0.0133	2.6233	0.83	-1.660217893	0.010304933	0.069888759	-5.960001932	1.69E-05	0.000229921	zinc finger BED domain-containing protein RICESLEEPER 2-like [Brassica napus]	-	-	-	-
MSTRG.52120	RGP4	1.55	1.4	1.46	2.79	5.14	4.35	0.16	0.55	0.17	0.2933	4.0933	1.47	-1.47746	0.002977447	0.025704735	-2.325203227	0.000208098	0.002037117	probable UDP-arabinopyranose mutase 4 isoform X2 [Brassica rapa]	ko00520//Amino sugar and nucleotide sugar metabolism	GO:0005795//Golgi stack;GO:0016020//membrane	GO:0005488//binding;GO:0016866//intramolecular transferase activity	GO:0044237//cellular metabolic process;GO:0044238//primary metabolic process;GO:0044710//single-organism metabolic process;GO:0044763//single-organism cellular process;GO:0050896//response to stimulus;GO:0071554//cell wall organization or biogenesis;GO:0071704//organic substance metabolic process
MSTRG.52146	fabD	20	22.9	24.02	40.36	47.77	42.65	4.3	9.01	8.35	7.22	43.5933	22.3067	-0.966632578	0.00017537	0.002293227	-1.627404202	7.48E-09	2.23E-07	PREDICTED: malonyl CoA-acyl carrier protein transacylase-like [Brassica oleracea var. oleracea] [Brassica oleracea]	ko01100//Metabolic pathways;ko01212//Fatty acid metabolism;ko00061//Fatty acid biosynthesis	GO:0009532//plastid stroma	GO:0004312//fatty acid synthase activity	GO:0006743//ubiquinone metabolic process
MSTRG.52187	BIP2	3.62	4.76	4.47	10.04	10.08	9.77	2.38	2.93	2.84	2.7167	9.9633	4.2833	-1.217894538	6.42E-05	0.00093658	-0.656896395	0.009078235	0.047447159	mediator of RNA polymerase II transcription subunit 37f [Brassica rapa]	ko04141//Protein processing in endoplasmic reticulum;ko03060//Protein export	GO:0005911//cell-cell junction;GO:0009536//plastid;GO:0030312//external encapsulating structure;GO:0031090//organelle membrane;GO:0043232//intracellular non-membrane-bounded organelle;GO:0043234//protein complex;GO:0044432//endoplasmic reticulum part	GO:0016628//oxidoreductase activity, acting on the CH-CH group of donors, NAD or NADP as acceptor;GO:0032550//purine ribonucleoside binding	GO:0000741//karyogamy;GO:0009725//response to hormone;GO:0010038//response to metal ion;GO:0010468//regulation of gene expression;GO:0022613//ribonucleoprotein complex biogenesis;GO:0033554//cellular response to stress;GO:0034645//cellular macromolecule biosynthetic process;GO:0043161//proteasome-mediated ubiquitin-dependent protein catabolic process;GO:0044710//single-organism metabolic process
MSTRG.52273	PRA1B3	0.23	0.41	0.63	0.06	0.07	0.05	0.89	0.22	0.54	0.55	0.06	0.4233	2.818759685	0.000591142	0.006587153	0.377637527	0.545573174	0.829477211	Calycin [Arabidopsis suecica]	-	GO:0031090//organelle membrane;GO:0031224//intrinsic component of membrane;GO:0043231//intracellular membrane-bounded organelle	-	GO:0006810//transport
MSTRG.52376	--	0.46	0.75	0.87	1.14	2.18	2.05	0.08	0.24	0.06	0.1267	1.79	0.6933	-1.36833856	0.066445419	0.283584071	-2.452512205	0.003405412	0.021381695	Pentatricopeptide repeat (PPR) superfamily protein [Arabidopsis thaliana]	-	-	-	-
MSTRG.52437	--	0	0	0	0.39	1.06	0.88	0	0	0.05	0.0167	0.7767	0	-9.601151739	0.000166347	0.002187824	4.058893689	0.782950109	0.928158637	BnaUnng04400D, partial [Brassica napus]	-	-	-	GO:0000041//transition metal ion transport;GO:0001101//response to acid chemical;GO:0009267//cellular response to starvation;GO:0015698//inorganic anion transport
MSTRG.52515	--	5.34	5.95	5.68	12.97	16.54	14.89	1.83	2.45	1.72	2	14.8	5.6567	-1.387573112	1.27E-08	4.09E-07	-1.499952159	8.03E-08	1.91E-06	unnamed protein product [Brassica napus]	-	-	-	-
MSTRG.52562	--	1.01	0.9	0.66	0.68	0.65	0.55	0.03	0.25	0.23	0.17	0.6267	0.8567	0.451035698	0.015980119	0.098769736	-2.333199207	0.001219911	0.009144941	hypothetical protein F2Q68_00001582 [Brassica cretica]	-	-	-	-
MSTRG.52799	PCMP-H29	4.45	2.8	3.32	0.1	0.03	0.06	3.94	5.73	6.53	5.4	0.0633	3.5233	5.797832148	6.85E-47	1.34E-43	0.616018436	0.001033494	0.007935532	PREDICTED: pentatricopeptide repeat-containing protein At2g41080 [Raphanus sativus]	-	GO:0043231//intracellular membrane-bounded organelle	-	-
MSTRG.52807	--	1.05	1.26	0.88	1.56	1.95	2.39	0	0	0.08	0.0267	1.9667	1.0633	-0.88715853	0.515230947	0.888851295	-5.317412614	6.04E-05	0.000703268	transmembrane protein [Arabidopsis thaliana]	-	-	-	-
MSTRG.52808	--	43.67	66.18	64.04	71.99	75.81	73.58	2.08	5.86	4.22	4.0533	73.7933	57.9633	-0.348349922	0.121026497	0.421644767	-3.837959835	2.58E-29	9.94E-27	transmembrane protein [Arabidopsis thaliana]	-	-	-	-
MSTRG.52912	POLD2	0.4	0.35	0.44	0.84	1.41	1.4	0.05	0.05	0.11	0.07	1.2167	0.3967	-1.61693489	0.005702776	0.043546912	-2.502500341	0.001295168	0.009617928	BnaA04g24920D [Brassica napus]	-	-	-	-
MSTRG.52953	--	66.94	60.82	73.78	35.99	27.92	30.52	166.91	108.74	134.43	136.6933	31.4767	67.18	1.093749026	2.15E-24	6.24E-22	1.024839182	1.21E-08	3.41E-07	hypothetical protein F2Q69_00002232 [Brassica cretica]	-	-	-	-
MSTRG.53003	ZPR1	3.33	5.08	3.73	5.29	9.15	7.87	0	0.91	0.05	0.32	7.4367	4.0467	-0.877922092	0.333870428	0.743159071	-3.660590206	7.94E-05	0.000889918	protein LITTLE ZIPPER 1-like [Brassica napus]	-	-	GO:0005488//binding	-
MSTRG.53060	ARF11	0.43	0.87	0.63	1.47	2.87	2.24	0.07	0.2	0.32	0.1967	2.1933	0.6433	-1.769486736	0.001136785	0.011468172	-1.709813988	0.011509267	0.057276928	PREDICTED: auxin response factor 11-like isoform X1 [Brassica oleracea var. oleracea] [Brassica oleracea]	-	GO:0005911//cell-cell junction;GO:0043231//intracellular membrane-bounded organelle	GO:0001071//nucleic acid binding transcription factor activity;GO:0005515//protein binding	GO:0009755//hormone-mediated signaling pathway;GO:0010468//regulation of gene expression;GO:0034645//cellular macromolecule biosynthetic process
MSTRG.53064	ESFL10	0.25	0.12	0.11	1.56	2.03	1.62	0	0	0.11	0.0367	1.7367	0.16	-3.440177062	0.003297621	0.02794834	-2.125530882	0.463790614	0.768751793	pollen coat protein B13 [Brassica oleracea]	-	-	-	-
MSTRG.53121	XBAT31	3.17	3.26	3.28	5.92	7.15	7.19	1.07	1.98	1.99	1.68	6.7533	3.2367	-1.061090973	0.00455842	0.036303243	-0.946047562	0.003534065	0.022035522	Ankyrin repeat [Arabidopsis thaliana x Arabidopsis arenosa]	-	-	GO:0003824//catalytic activity;GO:0046914//transition metal ion binding	GO:0032446//protein modification by small protein conjugation;GO:0032879//regulation of localization
MSTRG.53431	--	0.29	0.67	0.58	0.6	1.04	1.01	0	0.05	0.09	0.0467	0.8833	0.5133	-0.783062009	0.760399093	0.970363857	-3.459431619	0.005504602	0.031654363	hypothetical protein DY000_02059560 [Brassica cretica]	-	-	-	-
MSTRG.53434	--	0.28	0.32	1.15	0.87	1.05	2.77	0	0	0.06	0.02	1.5633	0.5833	-1.422233001	0.256449293	0.651458731	-4.866248611	0.006842495	0.03770834	hypothetical protein F2Q68_00017748 [Brassica cretica]	-	-	-	-
MSTRG.53456	--	1.08	0.86	1.14	1.02	1.48	1.76	0.17	0.08	0.07	0.1067	1.42	1.0267	-0.46792308	0.782216506	0.97358954	-3.266786541	0.001480536	0.010736831	BnaC05g03610D [Brassica napus]	-	-	-	-
MSTRG.53481	BDG3	3.25	2	3.17	0.42	0.93	0.71	4.18	9.51	11.42	8.37	0.6867	2.8067	2.031175896	5.22E-15	4.51E-13	1.57636989	4.50E-06	7.07E-05	probable lysophospholipase BODYGUARD 3 [Brassica napus]	-	GO:0005618//cell wall	GO:0003824//catalytic activity	GO:0006950//response to stress;GO:0009059//macromolecule biosynthetic process;GO:0010565//regulation of cellular ketone metabolic process
MSTRG.53483	At4g30570	0.67	0.77	1.01	1.78	2.22	1.88	0.07	0.33	0.15	0.1833	1.96	0.8167	-1.263034406	0.04983542	0.231614109	-2.155278225	0.002968263	0.019108752	probable mannose-1-phosphate guanylyltransferase 3 [Brassica rapa]	ko01100//Metabolic pathways;ko01110//Biosynthesis of secondary metabolites;ko00520//Amino sugar and nucleotide sugar metabolism;ko00051//Fructose and mannose metabolism	GO:0043231//intracellular membrane-bounded organelle;GO:0044444//cytoplasmic part	GO:0008905//mannose-phosphate guanylyltransferase activity;GO:0032550//purine ribonucleoside binding	GO:0000302//response to reactive oxygen species;GO:0001101//response to acid chemical;GO:0006006//glucose metabolic process;GO:0006970//response to osmotic stress;GO:0006996//organelle organization;GO:0009226//nucleotide-sugar biosynthetic process;GO:0009617//response to bacterium;GO:0019852//L-ascorbic acid metabolic process;GO:0030243//cellulose metabolic process;GO:0051603//proteolysis involve…
MSTRG.53536	--	2.5	2.46	5	3.4	5.94	5.93	0.09	0.97	1.46	0.84	5.09	3.32	-0.616482415	0.992673766	0.996916261	-1.982722009	0.007729125	0.041600197	hypothetical protein DY000_02003083 [Brassica cretica]	-	-	-	-
MSTRG.53537	--	9.73	15.53	15.42	12.76	21.7	14.16	1.28	1.62	2.06	1.6533	16.2067	13.56	-0.257230214	0.123461404	0.427031283	-3.035907653	2.01E-19	2.75E-17	EMBRYO SURROUNDING FACTOR 1.2 [Arabidopsis lyrata subsp. lyrata] [Arabidopsis lyrata]	-	-	-	-
MSTRG.53610	--	1.56	1.25	2.21	0.33	0.32	0.69	0.43	1.19	1.41	1.01	0.4467	1.6733	1.905454363	9.97E-07	2.21E-05	-0.72836957	0.234732657	0.51573235	unnamed protein product [Brassica napus]	-	-	-	-
MSTRG.53617	XTH9	3.15	6.73	10.35	13.32	14.9	21.27	0.37	0.47	1.03	0.6233	16.4967	6.7433	-1.290640722	0.022695687	0.128969741	-3.435386145	3.28E-11	1.43E-09	PREDICTED: xyloglucan endotransglucosylase/hydrolase protein 9 [Brassica oleracea var. oleracea] [Brassica oleracea]	-	GO:0005576//extracellular region;GO:0030312//external encapsulating structure	GO:0016758//transferase activity, transferring hexosyl groups;GO:0016787//hydrolase activity	GO:0044042//glucan metabolic process;GO:0045229//external encapsulating structure organization;GO:0048509//regulation of meristem development
MSTRG.53629	CYP705A22	0.03	0.03	0.12	0.59	1.42	0.99	0.15	0.05	0.12	0.1067	1	0.06	-4.058893689	5.27E-06	9.95E-05	0.830074999	0.431190379	0.74079058	BnaC03g30350D [Brassica napus]	-	-	-	-
MSTRG.53685	At1g56220	67.86	54.16	86.85	28.06	26.82	41.97	57.92	60.12	68.63	62.2233	32.2833	69.6233	1.108781339	3.57E-18	4.89E-16	-0.162115204	0.767671539	0.928158637	PREDICTED: dormancy-associated protein homolog 3-like isoform X1 [Raphanus sativus]	-	GO:0043231//intracellular membrane-bounded organelle	-	GO:0008104//protein localization;GO:0009725//response to hormone
MSTRG.53722	MGP4	1.6	1.29	1.53	2.38	3.06	2.96	0.31	0.64	0.35	0.4333	2.8	1.4733	-0.926342958	0.228183063	0.611922379	-1.765534746	0.000501846	0.004311261	PREDICTED: UDP-D-xylose:L-fucose alpha-1,3-D-xylosyltransferase MGP4-like [Brassica oleracea var. oleracea] [Brassica oleracea]	-	GO:0009536//plastid;GO:0031224//intrinsic component of membrane	GO:0008194//UDP-glycosyltransferase activity	GO:0010396//rhamnogalacturonan II metabolic process
MSTRG.53737	At5g36290	0.7	0.9	1.25	0.8	1.47	1.29	3.09	1.86	2.88	2.61	1.1867	0.95	-0.320915322	0.639273784	0.932788184	1.458050388	6.98E-05	0.000796943	GDT1-like protein 3 isoform X3 [Brassica napus]	-	GO:0031224//intrinsic component of membrane;GO:0043231//intracellular membrane-bounded organelle	-	GO:0006006//glucose metabolic process;GO:0016192//vesicle-mediated transport;GO:0030243//cellulose metabolic process
MSTRG.53747	--	5.76	23.46	20.03	50.26	104.89	67.96	0.25	0.23	0.1	0.1933	74.37	16.4167	-2.179559548	0.006551278	0.048758379	-6.407927014	1.64E-14	1.18E-12	hypothetical protein HID58_010773 [Brassica napus]	-	-	-	-
MSTRG.53883	AFP1	2.25	2.07	2.85	0.93	1.37	3.06	0.09	0	0.47	0.1867	1.7867	2.39	0.419740118	0.04465237	0.213595436	-3.678474387	2.75E-05	0.000352965	defensin-like protein 3 [Brassica napus]	ko04016//MAPK signaling pathway - plant	GO:0044464//cell part	-	GO:0000160//phosphorelay signal transduction system;GO:0009611//response to wounding;GO:0009685//gibberellin metabolic process;GO:0010476//gibberellin mediated signaling pathway;GO:0051707//response to other organism
MSTRG.53893	LCR18	2.41	3.16	3.27	4.97	3.7	2.16	1.17	0.94	1.45	1.1867	3.61	2.9467	-0.292914968	0.49029864	0.875425096	-1.312169128	0.004294995	0.025799658	BnaC03g34050D [Brassica napus]	-	-	-	GO:0050896//response to stimulus;GO:0051704//multi-organism process
MSTRG.53967	NUP98B	1.25	1.23	1.38	1.78	1.35	2.19	0.54	0.47	0.44	0.4833	1.7733	1.2867	-0.462825398	0.664853996	0.937543358	-1.412547947	2.64E-05	0.000341025	BnaC03g34800D [Brassica napus]	ko03013//Nucleocytoplasmic transport	GO:0012505//endomembrane system;GO:0043231//intracellular membrane-bounded organelle;GO:0046930//pore complex	GO:0005488//binding	GO:0008104//protein localization;GO:0050658//RNA transport
MSTRG.54039	--	2.5	3.6	3.14	4.74	6.5	8.75	7.51	6.57	7.35	7.1433	6.6633	3.08	-1.113313715	0.11682722	0.41190602	1.213667093	9.08E-06	0.000132489	unnamed protein product, partial [Brassica oleracea]	-	-	-	-
MSTRG.54114	--	10.34	15.05	15.29	8.18	21.3	24.72	1.38	3.12	2.34	2.28	18.0667	13.56	-0.413973172	0.450362754	0.847969586	-2.572251449	4.15E-16	3.69E-14	BnaAnng37760D [Brassica napus]	-	-	-	-
MSTRG.54121	--	0.25	0.58	0.42	0.93	1.98	2.25	0	0.05	0.1	0.05	1.72	0.4167	-2.045442971	0.00194996	0.018035814	-3.058893689	0.003064949	0.019624157	hypothetical protein Bca52824_053923 [Brassica carinata]	-	-	-	-
MSTRG.54133	REM7	0.46	0.2	0.11	0	0	0	1.69	1.26	1.98	1.6433	0	0.2567	8.003752135	3.66E-05	0.000569247	2.678657296	6.81E-07	1.32E-05	PREDICTED: B3 domain-containing protein REM7-like [Brassica oleracea var. oleracea] [Brassica oleracea]	-	GO:0043231//intracellular membrane-bounded organelle	-	-
MSTRG.54134	--	4.61	5.29	4.42	11.54	12.2	6.09	1.99	1.59	1.22	1.6	9.9433	4.7733	-1.058732485	0.100248164	0.373069498	-1.576925182	3.88E-06	6.22E-05	BnaC07g01040D [Brassica napus]	-	-	-	-
MSTRG.54211	CPA	0.34	0.26	0.31	0.75	1.3	1.32	0.06	0.06	0.03	0.05	1.1233	0.3033	-1.888810141	0.006844147	0.050492706	-2.600904045	0.009026077	0.047215118	PREDICTED: N-carbamoylputrescine amidase-like [Raphanus sativus]	ko01100//Metabolic pathways;ko00330//Arginine and proline metabolism	-	GO:0016810//hydrolase activity, acting on carbon-nitrogen (but not peptide) bonds	GO:0006596//polyamine biosynthetic process
MSTRG.54225	--	1.19	0.24	1.13	0.81	0.66	0.89	0.05	0.13	0.2	0.1267	0.7867	0.8533	0.117356951	0.252192614	0.645511292	-2.752072487	0.004041754	0.024556366	Zinc finger protein [Thalictrum thalictroides]	-	-	-	-
MSTRG.54290	--	2.03	1.67	2.33	3.82	6.41	5.43	1.19	2.38	2.65	2.0733	5.22	2.01	-1.376854305	0.001948383	0.01802502	0.044756578	0.691339306	0.905440859	hypothetical protein DY000_02037730 [Brassica cretica]	-	-	-	-
MSTRG.54320	--	3.72	3.19	4.3	2.92	2.02	4	1.01	2.4	1.74	1.7167	2.98	3.7367	0.326439542	0.002379498	0.021305375	-1.122141941	0.00422606	0.025466808	Ribonuclease H domain [Arabidopsis thaliana x Arabidopsis arenosa]	-	-	-	-
MSTRG.54363	UBC25	0.56	0.84	0.68	1.81	3.19	1.89	0.32	0.35	0.25	0.3067	2.2967	0.6933	-1.727920455	0.000952388	0.009869484	-1.176877762	0.029637841	0.119579313	PREDICTED: probable ubiquitin-conjugating enzyme E2 25 [Raphanus sativus]	ko04120//Ubiquitin mediated proteolysis	GO:0044424//intracellular part	GO:0003824//catalytic activity	-
MSTRG.54390	--	0.57	0.92	1.52	2.32	1.54	1.06	0.09	0.42	0.1	0.2033	1.64	1.0033	-0.708894829	0.717257006	0.954998406	-2.302882339	0.002914347	0.018819874	Harbinger transposase-derived protein [Arabidopsis suecica]	-	-	-	-
MSTRG.54637	--	1.64	1.88	1.79	0.71	0.45	0.44	0.61	1.54	1.22	1.1233	0.5333	1.77	1.730639956	3.33E-08	9.95E-07	-0.65596327	0.201309734	0.466877304	unnamed protein product [Brassica oleracea]	-	-	-	-
MSTRG.54647	--	0.7	0.85	0.94	0.59	0.66	1.16	2.4	1.73	3.45	2.5267	0.8033	0.83	0.047112596	0.175702712	0.528217689	1.606052106	1.86E-05	0.00024987	osteocalcin 2 [Brassica rapa]	-	-	-	-
MSTRG.54694	--	0	0.1	0	0	0	0	7	1.55	4.9	4.4833	0	0.0333	5.058893689	0.652519442	0.932788184	7.071462363	1.75E-07	3.88E-06	BnaC03g42840D [Brassica napus]	-	-	-	-
MSTRG.54705	At2g39360	1.25	0.05	0.69	0.04	0.05	0.18	5.22	3.71	6.05	4.9933	0.09	0.6633	2.881737118	0.002118106	0.019324324	2.912197288	5.31E-06	8.21E-05	probable receptor-like protein kinase At2g39360 [Arabidopsis lyrata subsp. lyrata] [Arabidopsis lyrata]	-	GO:0016020//membrane	GO:0004672//protein kinase activity	GO:0001101//response to acid chemical;GO:0001558//regulation of cell growth;GO:0015698//inorganic anion transport;GO:0016310//phosphorylation
MSTRG.54706	MYOB1	0.74	1.46	1.7	0.42	0.37	0.4	9.22	5.61	9.08	7.97	0.3967	1.3	1.71251255	1.21E-05	0.000209571	2.616068101	1.09E-14	8.10E-13	PREDICTED: myosin-binding protein 1 [Brassica oleracea var. oleracea] [Brassica oleracea]	-	-	-	-
MSTRG.54721	SCPL16	5.82	5.6	7.08	1.49	0.91	1.13	5.85	8.34	7.86	7.35	1.1767	6.1667	2.389785182	4.32E-23	1.09E-20	0.253253385	0.122131044	0.333413113	PREDICTED: serine carboxypeptidase-like 7 isoform X1 [Raphanus sativus]	-	GO:0005618//cell wall;GO:0043231//intracellular membrane-bounded organelle	GO:0004180//carboxypeptidase activity;GO:0016753//O-sinapoyltransferase activity	GO:0000097//sulfur amino acid biosynthetic process;GO:0006090//pyruvate metabolic process;GO:0006544//glycine metabolic process;GO:0006633//fatty acid biosynthetic process;GO:0006732//coenzyme metabolic process;GO:0006753//nucleoside phosphate metabolic process;GO:0009683//indoleacetic acid metabolic process;GO:0009694//jasmonic acid metabolic process;GO:0019538//protein metabolic process
MSTRG.54749	At2g14710	0	0.11	0.21	0.19	0	0.17	3.48	0.58	2.42	2.16	0.12	0.1067	-0.169925001	0.876830588	0.992725033	4.339850003	0.00022425	0.002169256	BnaC04g44850D [Brassica napus]	-	GO:0009536//plastid;GO:0031461//cullin-RING ubiquitin ligase complex	-	GO:0019941//modification-dependent protein catabolic process;GO:0032446//protein modification by small protein conjugation;GO:0051707//response to other organism
MSTRG.54766	--	0.79	1.21	0.7	2.77	5.39	3.37	0	0.17	0.11	0.0933	3.8433	0.9	-2.094361201	6.54E-06	0.000121075	-3.269460675	2.03E-05	0.000269996	NLI interacting factor family protein [Arabidopsis lyrata subsp. lyrata] [Arabidopsis lyrata]	ko03013//Nucleocytoplasmic transport	GO:0005623//cell	GO:0003824//catalytic activity	GO:0003006//developmental process involved in reproduction;GO:0006464//cellular protein modification process;GO:0009628//response to abiotic stimulus;GO:0009791//post-embryonic development;GO:0044763//single-organism cellular process;GO:0048731//system development;GO:0050789//regulation of biological process
MSTRG.54887	--	4.44	4.2	5.23	2.29	2.28	2.6	0.91	2.65	1.96	1.84	2.39	4.6233	0.951922764	3.80E-12	2.16E-10	-1.329227616	0.001164226	0.008784118	hypothetical protein IGI04_006694 [Brassica rapa subsp. trilocularis] [Brassica rapa]	-	-	-	-
MSTRG.54974	--	3.05	5.98	6.19	9.41	15.06	16	0.29	0.81	0.65	0.5833	13.49	5.0733	-1.41088449	0.000383014	0.004524853	-3.120541532	2.27E-14	1.61E-12	BnaC07g15850D [Brassica napus]	-	-	-	-
MSTRG.54975	--	0.59	1.01	1.26	2.77	3.56	5.33	0.4	0.42	0.27	0.3633	3.8867	0.9533	-2.027480736	0.00026811	0.003318272	-1.391687012	0.032949606	0.129729947	BnaC07g15840D [Brassica napus]	-	-	-	-
MSTRG.54976	--	2.87	4.61	5.25	7.82	13.48	13.2	1.29	0.64	1.22	1.05	11.5	4.2433	-1.438363943	0.000733344	0.007920462	-2.014808686	2.64E-06	4.40E-05	BnaC07g15850D [Brassica napus]	-	-	-	-
MSTRG.55008	--	0.18	0.03	0.03	0.43	1.16	1	0.2	0.25	0.07	0.1733	0.8633	0.08	-3.431845787	0.001693108	0.016025379	1.115477217	0.363274358	0.671990436	O-fucosyltransferase 31 [Morus notabilis]	-	-	GO:0016740//transferase activity	-
MSTRG.55018	CLPB3	0.87	0.56	0.72	1.06	1.66	1.2	0	0	0.08	0.0267	1.3067	0.7167	-0.866516995	0.669424752	0.939627938	-4.74819285	0.003877051	0.023752755	PREDICTED: chaperone protein ClpB3, chloroplastic-like [Brassica oleracea var. oleracea] [Brassica oleracea]	-	-	-	-
MSTRG.55055	--	1.21	2.37	1.47	3.67	9.24	11.19	0	0.32	0.29	0.2033	8.0333	1.6833	-2.254677853	0.000266385	0.003300419	-3.04940224	0.000656575	0.00540789	BnaC03g47720D [Brassica napus]	-	GO:0005911//cell-cell junction;GO:0016020//membrane	GO:0003824//catalytic activity	GO:0006950//response to stress
MSTRG.55074	--	0.88	0.95	0.97	1.68	1.64	1.27	0.21	0.35	0.18	0.2467	1.53	0.9333	-0.713067326	0.693597468	0.949926496	-1.919829651	0.00014906	0.001527035	BnaA10g09250D [Brassica napus]	-	-	-	-
MSTRG.55095	--	2.1	2.05	2.85	7.18	7.81	6.92	0.9	2.26	1.19	1.45	7.3033	2.3333	-1.646162657	0.000101198	0.001409093	-0.686339521	0.243413815	0.527594507	LOW QUALITY PROTEIN: hypothetical protein HID58_054579 [Brassica napus]	-	-	-	-
MSTRG.55097	--	0.24	0.43	0.61	0.15	0.69	0.38	0.96	1.09	1.34	1.13	0.4067	0.4267	0.069262662	0.328113697	0.737303178	1.405141463	0.005864127	0.033288558	BnaC03g13060D [Brassica napus]	-	-	-	-
MSTRG.55165	--	2.35	2.99	4.92	5.18	5.21	6.02	0.46	1.93	0.58	0.99	5.47	3.42	-0.677544508	0.696926072	0.950597638	-1.788495895	0.002581834	0.017041353	Harbinger transposase-derived protein [Arabidopsis suecica]	-	-	-	-
MSTRG.55170	--	0.59	0.9	1.63	0.75	1.83	2.95	0.07	0.1	0.13	0.1	1.8433	1.04	-0.825733451	0.670114718	0.939627938	-3.378511623	1.54E-05	0.000211916	BnaC05g30760D [Brassica napus]	-	-	-	-
MSTRG.55200	OFUT39	7.38	7.07	8.3	3.84	4.74	5.54	31.32	17.5	24.43	24.4167	4.7067	7.5833	0.688126457	1.24E-17	1.56E-15	1.686962214	2.24E-14	1.59E-12	O-fucosyltransferase 39 isoform X1 [Brassica rapa]	-	-	GO:0016740//transferase activity	-
MSTRG.55304	--	0.47	0.79	0.53	2.12	2.21	1.93	2.97	1.42	4.38	2.9233	2.0867	0.5967	-1.80620307	0.002780615	0.024252151	2.292617255	1.51E-06	2.68E-05	unnamed protein product [Brassica napus]	-	-	-	-
MSTRG.55374	TUBB2	10.13	13.38	13.1	33.49	52.79	38.49	3.9	5.28	3.65	4.2767	41.59	12.2033	-1.768961412	3.45E-15	3.08E-13	-1.512716603	2.71E-09	8.77E-08	tubulin beta-2 chain [Camelina sativa]	ko04145//Phagosome	GO:0005911//cell-cell junction;GO:0015630//microtubule cytoskeleton;GO:0016020//membrane;GO:0030312//external encapsulating structure;GO:0043231//intracellular membrane-bounded organelle;GO:0043234//protein complex	GO:0005198//structural molecule activity;GO:0017111//nucleoside-triphosphatase activity;GO:0032550//purine ribonucleoside binding	GO:0006006//glucose metabolic process;GO:0006970//response to osmotic stress;GO:0006996//organelle organization;GO:0010038//response to metal ion;GO:0043623//cellular protein complex assembly;GO:0044763//single-organism cellular process;GO:0051603//proteolysis involved in cellular protein catabolic process
MSTRG.55385	--	0.51	1.17	1.1	2.48	4.59	3.78	0	0.2	0.09	0.0967	3.6167	0.9267	-1.964538255	0.000137491	0.001849319	-3.260960078	0.000224847	0.002174431	high mobility group B protein 2 isoform X2 [Eutrema salsugineum]	-	-	-	-
MSTRG.55407	At3g08650	1.02	0.28	0.56	0.97	1.17	1.1	2.66	1.46	2.85	2.3233	1.08	0.62	-0.800691192	0.740956825	0.965092234	1.905856035	0.000378581	0.003393115	BnaC02g34200D [Brassica napus]	-	-	-	-
MSTRG.55501	--	0.32	0.56	0.34	0.46	0.73	0.78	0	0.05	0.02	0.0233	0.6567	0.4067	-0.691314482	0.867743401	0.988921665	-4.123382416	0.000549235	0.004655662	hypothetical protein F2Q68_00004389 [Brassica cretica]	-	-	-	-
MSTRG.55527	--	1.82	0.84	1.07	0	0	0.09	0.97	1.29	1.88	1.38	0.03	1.2433	5.373106819	9.14E-05	0.001284458	0.150455137	0.732697721	0.928158637	hypothetical protein F2Q70_00002878 [Brassica cretica]	-	-	-	-
MSTRG.55529	TERT	1.64	3.08	2.4	4.19	5.1	3.27	0.53	1.1	0.86	0.83	4.1867	2.3733	-0.818887318	0.51108653	0.887030386	-1.515731499	0.005626014	0.032212013	telomerase reverse transcriptase isoform X3 [Brassica rapa]	-	GO:0043229//intracellular organelle	GO:0003676//nucleic acid binding;GO:0003964//RNA-directed DNA polymerase activity	GO:0006278//RNA-dependent DNA replication;GO:0006997//nucleus organization;GO:0051640//organelle localization
MSTRG.55536	GAD2	20.89	20.46	18.11	9.62	4.48	6.86	34.65	45.04	50.05	43.2467	6.9867	19.82	1.504280746	3.05E-07	7.51E-06	1.125631976	6.15E-12	3.06E-10	glutamate decarboxylase 2-like [Brassica rapa]	ko01100//Metabolic pathways;ko01110//Biosynthesis of secondary metabolites;ko00250//Alanine, aspartate and glutamate metabolism;ko00410//beta-Alanine metabolism;ko00650//Butanoate metabolism;ko00430//Taurine and hypotaurine metabolism	GO:0043231//intracellular membrane-bounded organelle;GO:0044444//cytoplasmic part	GO:0005515//protein binding;GO:0016705//oxidoreductase activity, acting on paired donors, with incorporation or reduction of molecular oxygen;GO:0016831//carboxy-lyase activity;GO:0043168//anion binding;GO:0043169//cation binding	GO:0001101//response to acid chemical;GO:0006605//protein targeting;GO:0006873//cellular ion homeostasis;GO:0006970//response to osmotic stress;GO:0009064//glutamine family amino acid metabolic process;GO:0009746//response to hexose;GO:0009891//positive regulation of biosynthetic process;GO:0010038//response to metal ion;GO:0015698//inorganic anion transport;GO:0030001//metal ion transport;GO:003…
MSTRG.55551	--	1.27	1.01	1.41	0.34	0.11	0.79	0.53	1.62	0.33	0.8267	0.4133	1.23	1.573280696	0.000746286	0.008035857	-0.573280696	0.505468868	0.800147306	unnamed protein product [Brassica napus]	-	-	-	-
MSTRG.55606	OFP5	2.52	2.61	2.6	2.37	3.8	4.62	6.67	5.71	6	6.1267	3.5967	2.5767	-0.481154546	0.632695079	0.932788184	1.249596447	3.68E-08	9.33E-07	Ovate protein family C-terminal [Arabidopsis suecica]	-	-	-	-
MSTRG.55662	RGLG4	4.68	6.08	6.13	4.99	6.88	9.08	2.02	2.92	3.47	2.8033	6.9833	5.63	-0.310780916	0.305598729	0.712492053	-1.005991623	0.001190756	0.008958648	E3 ubiquitin-protein ligase RGLG4-like isoform X5 [Olea europaea var. sylvestris] [Olea europaea]	-	GO:0043231//intracellular membrane-bounded organelle	-	GO:0044237//cellular metabolic process;GO:0044699//single-organism process;GO:0050896//response to stimulus;GO:0071704//organic substance metabolic process
MSTRG.55738	--	0.57	0.42	0.66	0.5	0.69	0.76	0.04	0.07	0	0.0367	0.65	0.55	-0.2410081	0.495144371	0.879340181	-3.906890596	0.000783582	0.006274288	BnaC03g75970D [Brassica napus]	-	-	-	-
MSTRG.55786	CLPR2	0.54	1.19	0.72	2.28	5.15	3.54	0.76	0.43	0.13	0.44	3.6567	0.8167	-2.162709871	0.001631916	0.015541751	-0.89224382	0.385833499	0.694725177	PREDICTED: ATP-dependent Clp protease proteolytic subunit-related protein 2, chloroplastic [Raphanus sativus]	-	-	-	-
MSTRG.55825	--	0.94	1.01	0.57	0	1.4	2.3	0	0	0	0	1.2333	0.84	-0.554101537	0.915132186	0.994882214	-9.714245518	0.000140664	0.001454783	BnaCnng17430D [Brassica napus]	-	-	-	-
MSTRG.55826	--	0	0	0	2.34	0.42	0.06	0.27	0.41	0.82	0.5	0.94	0	-9.876516947	0.002832658	0.024637806	8.965784285	0.003028834	0.019435409	BnaCnng17430D [Brassica napus]	-	-	-	-
MSTRG.55828	PUB6	0.29	0.14	0.25	0.3	0.32	0.31	1.96	0.99	1.66	1.5367	0.31	0.2267	-0.45169597	0.733854555	0.961532032	2.761160099	5.25E-11	2.23E-09	PREDICTED: U-box domain-containing protein 6-like [Brassica oleracea var. oleracea] [Brassica oleracea]	-	GO:0043231//intracellular membrane-bounded organelle	GO:0019787//ubiquitin-like protein transferase activity;GO:0033612//receptor serine/threonine kinase binding	GO:0032446//protein modification by small protein conjugation
MSTRG.55890	--	1.14	1.32	1	1.74	1.86	1.18	0.04	0.25	0	0.0967	1.5933	1.1533	-0.46623858	0.74489919	0.966660728	-3.576647233	0.000104207	0.001124184	hypothetical protein DY000_02004712 [Brassica cretica]	-	-	-	-
MSTRG.56050	--	9.73	15.53	15.42	12.76	21.7	14.16	1.28	1.62	2.06	1.6533	16.2067	13.56	-0.257230214	0.123461404	0.427031283	-3.035907653	2.01E-19	2.75E-17	EMBRYO SURROUNDING FACTOR 1.2 [Arabidopsis lyrata subsp. lyrata] [Arabidopsis lyrata]	-	-	-	-
MSTRG.56076	ICL	0.06	0.22	0.13	0.09	0	0	5.96	2	3.77	3.91	0.03	0.1367	2.187627003	0.047618747	0.224362673	4.838435293	1.56E-19	2.18E-17	PREDICTED: LOW QUALITY PROTEIN: isocitrate lyase [Brassica oleracea var. oleracea] [Brassica oleracea]	ko01100//Metabolic pathways;ko01110//Biosynthesis of secondary metabolites;ko01200//Carbon metabolism;ko00630//Glyoxylate and dicarboxylate metabolism	GO:0005777//peroxisome	GO:0016833//oxo-acid-lyase activity	GO:0003006//developmental process involved in reproduction;GO:0006101//citrate metabolic process;GO:0044262//cellular carbohydrate metabolic process
MSTRG.56127	KIN10A	0.11	0.26	0.1	1.12	3.01	1.46	0.11	0.05	0.09	0.0833	1.8633	0.1567	-3.572115621	5.96E-09	2.05E-07	-0.910732662	0.397195793	0.706434517	kinesin-like protein KIN-10A [Brassica rapa]	-	GO:0015630//microtubule cytoskeleton;GO:0044444//cytoplasmic part	GO:0003774//motor activity;GO:0032550//purine ribonucleoside binding	GO:0006342//chromatin silencing;GO:0007017//microtubule-based process;GO:0034968//histone lysine methylation;GO:0048449//floral organ formation;GO:0048580//regulation of post-embryonic development;GO:1902410//mitotic cytokinetic process
MSTRG.5614	--	7.07	9.04	6.72	8.47	9.4	9.96	0.52	3.07	1.83	1.8067	9.2767	7.61	-0.285710049	0.077229359	0.314670189	-2.074566103	5.32E-05	0.000629955	SET domain [Arabidopsis thaliana x Arabidopsis arenosa]	ko04141//Protein processing in endoplasmic reticulum	-	-	-
MSTRG.56195	GGT1	43.81	84.07	63	69.24	122.72	78.69	4.21	6.96	6.21	5.7933	90.2167	63.6267	-0.50376244	0.605747623	0.932788184	-3.457165961	1.09E-32	6.01E-30	BnaC03g76380D [Brassica napus]	ko01100//Metabolic pathways;ko00480//Glutathione metabolism;ko00460//Cyanoamino acid metabolism;ko00590//Arachidonic acid metabolism;ko00430//Taurine and hypotaurine metabolism	-	-	-
MSTRG.56196	GGT2	0.45	1.8	1.31	1.1	2.45	1.62	0.03	0.19	0.08	0.1	1.7233	1.1867	-0.538287039	0.859839452	0.985677547	-3.568842835	1.20E-05	0.000170175	PREDICTED: gamma-glutamyltranspeptidase 1-like [Brassica oleracea var. oleracea] [Brassica oleracea]	ko01100//Metabolic pathways;ko00480//Glutathione metabolism;ko00460//Cyanoamino acid metabolism;ko00590//Arachidonic acid metabolism;ko00430//Taurine and hypotaurine metabolism	-	-	-
MSTRG.56232	At3g44090	2.35	2.99	3.34	5.03	8.43	8.03	1.53	1.88	1.63	1.68	7.1633	2.8933	-1.307898535	0.002266504	0.02046154	-0.784271309	0.021802983	0.094295398	PREDICTED: F-box/LRR-repeat protein At1g06630-like [Brassica oleracea var. oleracea] [Brassica oleracea]	-	-	-	-
MSTRG.56266	--	1.4	1.76	2.08	3.47	3.31	4.39	0.08	0.58	0.46	0.3733	3.7233	1.7467	-1.091990469	0.167817692	0.514645781	-2.226068079	0.002567363	0.016964243	-	-	-	-	-
MSTRG.56295	--	2.3	2.36	2.05	4.42	8.36	7.08	0.06	0.36	0.09	0.17	6.62	2.2367	-1.565480951	0.000979335	0.010117986	-3.717743614	1.24E-07	2.84E-06	hypothetical protein HID58_057080 [Brassica napus]	-	-	-	-
MSTRG.56344	--	21.18	20.82	23.42	48.14	52.84	47.17	10.92	16.55	14.77	14.08	49.3833	21.8067	-1.179254962	5.04E-08	1.45E-06	-0.631121925	0.006490644	0.036134417	unnamed protein product [Brassica napus]	-	-	-	-
MSTRG.56454	--	1.44	3.54	2.91	3.03	6.37	7.28	1.59	0.65	0.48	0.9067	5.56	2.63	-1.080022083	0.113613302	0.404418488	-1.536418649	0.001915701	0.013327504	hypothetical protein IGI04_042479 [Brassica rapa subsp. trilocularis] [Brassica rapa]	-	-	-	-
MSTRG.5660	TSO2	2.6	2.89	3.21	6.62	6.73	5.61	0.5	1.16	1.38	1.0133	6.32	2.9	-1.123871658	0.008463966	0.059889493	-1.516944077	4.45E-05	0.000538817	BnaA03g52980D [Brassica napus]	ko01100//Metabolic pathways;ko00230//Purine metabolism;ko00240//Pyrimidine metabolism;ko00480//Glutathione metabolism	GO:0031224//intrinsic component of membrane;GO:0043231//intracellular membrane-bounded organelle;GO:0044444//cytoplasmic part	GO:0016728//oxidoreductase activity, acting on CH or CH2 groups, disulfide as acceptor;GO:0016757//transferase activity, transferring glycosyl groups;GO:0046872//metal ion binding	GO:0006221//pyrimidine nucleotide biosynthetic process;GO:0006260//DNA replication;GO:0007049//cell cycle;GO:0008219//cell death;GO:0009132//nucleoside diphosphate metabolic process;GO:0044707//single-multicellular organism process
MSTRG.56627	--	0.66	0.99	0.6	1.51	1.86	3.45	0	0.08	0.06	0.0467	2.2733	0.75	-1.599846738	0.00559317	0.042875208	-4.006426269	1.42E-08	3.95E-07	BnaC03g54850D [Brassica napus]	-	-	-	-
MSTRG.56652	GIP	2.74	2.09	2.03	0.69	0.09	0.19	2.89	5.48	4.91	4.4267	0.3233	2.2867	2.822151924	0.000163484	0.002154666	0.952974665	0.000126398	0.001323852	Terpene synthase N-terminal domain [Arabidopsis suecica]	-	-	GO:0016787//hydrolase activity	-
MSTRG.56653	BGLU3	3.11	3.53	3.84	0.35	0.07	0.13	4.17	7.66	5.12	5.65	0.1833	3.4933	4.252063288	2.54E-81	1.89E-77	0.693646556	1.27E-06	2.29E-05	Terpene synthase N-terminal domain [Arabidopsis suecica]	-	-	GO:0016787//hydrolase activity	-
MSTRG.56697	--	11.03	8.37	9.85	5.91	6.14	7.3	21.15	16.26	24.03	20.48	6.45	9.75	0.596103058	2.71E-12	1.57E-10	1.070741591	5.42E-09	1.66E-07	BnaAnng22330D [Brassica napus]	-	-	-	-
MSTRG.56706	At1g75220	0.88	1.36	1.06	3.88	4.4	4.46	0.09	0.12	0.14	0.1167	4.2467	1.1	-1.948827348	5.74E-06	0.000107664	-3.237039197	9.41E-06	0.000136865	sugar transporter ERD6-like 6 [Prunus yedoensis var. nudiflora] [Prunus yedoensis]	-	GO:0031090//organelle membrane;GO:0043231//intracellular membrane-bounded organelle	GO:0022891//substrate-specific transmembrane transporter activity	GO:0044765//single-organism transport
MSTRG.56777	CUL1	11.88	9.29	14.81	8.94	13.57	13.32	41.61	22.81	35.58	33.3333	11.9433	11.9933	0.006027143	0.001273777	0.01261233	1.474732908	1.19E-09	4.10E-08	cullin-1-like [Brassica napus]	ko04141//Protein processing in endoplasmic reticulum;ko04120//Ubiquitin mediated proteolysis	GO:0000228//nuclear chromosome;GO:0015630//microtubule cytoskeleton;GO:0044444//cytoplasmic part	GO:0005488//binding	GO:0001101//response to acid chemical;GO:0006464//cellular protein modification process;GO:0007049//cell cycle;GO:0009755//hormone-mediated signaling pathway;GO:0009793//embryo development ending in seed dormancy;GO:0009888//tissue development;GO:0034645//cellular macromolecule biosynthetic process;GO:0043623//cellular protein complex assembly;GO:0044765//single-organism transport;GO:0048827//phy…
MSTRG.56792	VPS45	4.86	5.11	4.74	9.24	11.63	12.38	1.51	2.64	2.05	2.0667	11.0833	4.9033	-1.176557094	0.00038371	0.004530884	-1.246457126	4.45E-05	0.000538568	vacuolar protein sorting-associated protein 45 homolog isoform X2 [Brassica napus]	ko04144//Endocytosis	GO:0005774//vacuolar membrane;GO:0031984//organelle subcompartment	GO:0005488//binding;GO:0022892//substrate-specific transporter activity	GO:0006605//protein targeting;GO:0006865//amino acid transport;GO:0015672//monovalent inorganic cation transport;GO:0015748//organophosphate ester transport;GO:0016482//cytoplasmic transport;GO:0043067//regulation of programmed cell death;GO:0048278//vesicle docking;GO:0051049//regulation of transport;GO:0051707//response to other organism;GO:0061024//membrane organization;GO:0070838//divalent me…
MSTRG.56793	--	0.75	1.27	1.06	3.19	4.91	3.43	0.2	0.21	0.22	0.21	3.8433	1.0267	-1.904390257	6.79E-06	0.000125013	-2.289506617	0.000389802	0.003479877	hypothetical protein F2Q70_00013491 [Brassica cretica]	-	-	-	-
MSTRG.56999	--	0.62	0.71	0.75	1.39	1.28	1.6	0.15	0.36	0.33	0.28	1.4233	0.6933	-1.037652541	0.726495478	0.957758562	-1.308122295	0.000481167	0.004164045	hypothetical protein IGI04_031435 [Brassica rapa subsp. trilocularis] [Brassica rapa]	-	-	-	-
MSTRG.5720	KCS20	0.03	0.05	0.18	0.16	0.08	0.04	0.39	0.8	1	0.73	0.0933	0.0867	-0.106915204	0.685798086	0.946770281	3.074347341	3.49E-05	0.000434992	3-ketoacyl-CoA synthase 20 [Brassica rapa]	ko01100//Metabolic pathways;ko01110//Biosynthesis of secondary metabolites;ko04626//Plant-pathogen interaction;ko00062//Fatty acid elongation	GO:0031224//intrinsic component of membrane	GO:0004312//fatty acid synthase activity	GO:0006631//fatty acid metabolic process;GO:0006950//response to stress;GO:0007275//multicellular organism development;GO:0009416//response to light stimulus;GO:0009699//phenylpropanoid biosynthetic process;GO:0009812//flavonoid metabolic process
MSTRG.57233	ABA2	1.29	1.17	1.49	1.41	0.94	1.63	0.28	0.79	0.61	0.56	1.3267	1.3167	-0.010915777	0.059927174	0.263735901	-1.23339142	0.005237304	0.030430049	BnaC06g16020D [Brassica napus]	-	GO:0044444//cytoplasmic part	GO:0004022//alcohol dehydrogenase (NAD) activity	GO:0006560//proline metabolic process;GO:0006950//response to stress;GO:0009687//abscisic acid metabolic process;GO:0009746//response to hexose;GO:0009756//carbohydrate mediated signaling;GO:0010565//regulation of cellular ketone metabolic process
MSTRG.57329	--	0.59	0.49	0.32	1.96	0.84	0.85	0.06	0	0	0.02	1.2167	0.4667	-1.382469637	0.230823484	0.615558804	-4.544320516	0.004693641	0.027747497	hypothetical protein F2Q70_00042763 [Brassica cretica]	-	-	-	-
MSTRG.57367	--	0.57	0.37	0.52	0.1	0.13	0.09	4.58	1.84	4.25	3.5567	0.1067	0.4867	2.189824559	0.000356893	0.00426116	2.869519902	5.06E-10	1.85E-08	hypothetical protein F2Q70_00039729 [Brassica cretica]	-	-	-	-
MSTRG.57374	--	0.09	0.2	0.11	0.45	0	0.92	2.87	0.62	1.23	1.5733	0.4567	0.1333	-1.776103988	0.358908166	0.768159769	3.560714954	1.33E-05	0.000185584	BnaCnng61580D [Brassica napus]	ko03420//Nucleotide excision repair;ko03440//Homologous recombination;ko03030//DNA replication;ko03430//Mismatch repair	-	-	-
MSTRG.57591	AAK6	1.22	1.04	1.5	0.82	0.45	0.58	5.77	3.3	2.89	3.9867	0.6167	1.2533	1.023207391	0.001004487	0.010320521	1.669412823	1.52E-05	0.000209257	PREDICTED: adenylate kinase isoenzyme 6 homolog [Brassica oleracea var. oleracea] [Brassica oleracea]	ko01100//Metabolic pathways;ko01110//Biosynthesis of secondary metabolites;ko00230//Purine metabolism;ko03008//Ribosome biogenesis in eukaryotes	GO:0043231//intracellular membrane-bounded organelle	GO:0016776//phosphotransferase activity, phosphate group as acceptor;GO:0017111//nucleoside-triphosphatase activity;GO:0032550//purine ribonucleoside binding	GO:0009117//nucleotide metabolic process;GO:0044707//single-multicellular organism process;GO:0048589//developmental growth
MSTRG.57736	--	0.56	0.21	1.35	0.37	0	0	0	0	0	0	0.1233	0.7067	2.518467089	0.041398008	0.202203604	-9.464886049	0.007104657	0.038887535	hypothetical protein F2Q69_00008645 [Brassica cretica]	-	-	-	-
MSTRG.57833	KAI2	0.07	0	0	0.03	0.16	0.07	4.14	0.65	2.01	2.2667	0.0867	0.0233	-1.893084796	0.51529641	0.888851295	6.602036014	3.82E-08	9.66E-07	PREDICTED: probable esterase KAI2 [Brassica oleracea var. oleracea] [Brassica oleracea]	-	GO:0044444//cytoplasmic part	GO:0016788//hydrolase activity, acting on ester bonds	GO:0009411//response to UV;GO:0009639//response to red or far red light;GO:0009812//flavonoid metabolic process;GO:0034285//response to disaccharide
MSTRG.57863	--	0	1.82	1.08	9.99	9.15	5.88	0	0	0.04	0.0133	8.34	0.9667	-3.108956984	0.06862055	0.290084063	-6.17990909	0.001013921	0.00780874	BnaAnng10440D [Brassica napus]	-	-	-	-
MSTRG.57872	ARF1	0.81	1.18	0.67	1.22	1.6	1.14	3.24	2.95	3.23	3.14	1.32	0.8867	-0.574074185	0.886463055	0.994882214	1.824300814	4.01E-12	2.04E-10	PREDICTED: auxin response factor 1 isoform X1 [Brassica oleracea var. oleracea] [Brassica oleracea]	ko04075//Plant hormone signal transduction	GO:0043231//intracellular membrane-bounded organelle;GO:0044444//cytoplasmic part	GO:0001071//nucleic acid binding transcription factor activity;GO:0003676//nucleic acid binding;GO:0005515//protein binding;GO:0032550//purine ribonucleoside binding;GO:0060229//lipase activator activity	GO:0006006//glucose metabolic process;GO:0006305//DNA alkylation;GO:0006342//chromatin silencing;GO:0006498//N-terminal protein lipidation;GO:0006810//transport;GO:0008104//protein localization;GO:0009755//hormone-mediated signaling pathway;GO:0010038//response to metal ion;GO:0010260//organ senescence;GO:0030422//production of siRNA involved in RNA interference;GO:0035556//intracellular signal t…
MSTRG.57896	--	0.31	0.14	0.57	1.56	1.65	2.24	0.04	0.04	0	0.0267	1.8167	0.34	-2.417687078	0.000558919	0.006280248	-3.672425342	0.01188825	0.058704346	hypothetical protein HID58_058338 [Brassica napus]	-	-	-	-
MSTRG.57928	BGLU29	23.42	22.74	27.86	11.13	9.34	14.08	11.32	24.61	19.26	18.3967	11.5167	24.6733	1.099229425	1.76E-23	4.75E-21	-0.42350825	0.239470824	0.522258297	BnaC04g03760D [Brassica napus]	ko01100//Metabolic pathways;ko01110//Biosynthesis of secondary metabolites;ko00940//Phenylpropanoid biosynthesis;ko00500//Starch and sucrose metabolism;ko00460//Cyanoamino acid metabolism	GO:0005911//cell-cell junction;GO:0009536//plastid;GO:0042579//microbody	GO:0015926//glucosidase activity;GO:0019899//enzyme binding;GO:0046914//transition metal ion binding;GO:0046983//protein dimerization activity	GO:0006355//regulation of transcription, DNA-templated;GO:0006952//defense response;GO:0006970//response to osmotic stress;GO:0006996//organelle organization;GO:0009409//response to cold;GO:0009608//response to symbiont;GO:0009725//response to hormone;GO:0009746//response to hexose;GO:0009827//plant-type cell wall modification;GO:0034285//response to disaccharide;GO:0044767//single-organism devel…
MSTRG.57987	RPS2A	0.59	1.88	0.72	2.87	5.62	4.9	0.21	0.12	0.28	0.2033	4.4633	1.0633	-2.069527632	0.002842199	0.024707664	-2.386675276	0.010224389	0.05220237	40S ribosomal protein S2-4-like [Pyrus ussuriensis x Pyrus communis]	ko03010//Ribosome	GO:0005911//cell-cell junction;GO:0009536//plastid;GO:0015935//small ribosomal subunit;GO:0016020//membrane;GO:0030312//external encapsulating structure	GO:0005198//structural molecule activity	GO:0006221//pyrimidine nucleotide biosynthetic process;GO:0009451//RNA modification;GO:0010467//gene expression
MSTRG.58060	--	1.98	1.6	1.97	4.25	5.54	5.76	0.45	0.96	1	0.8033	5.1833	1.85	-1.486354904	3.71E-05	0.000575327	-1.203454625	0.003979601	0.024262618	BnaA06g15060D [Brassica napus]	-	GO:0043231//intracellular membrane-bounded organelle	-	-
MSTRG.58094	LCR52	1.76	3.64	3.91	2.73	5.74	3.72	0.35	0.54	0.6	0.4967	4.0633	3.1033	-0.388845053	0.603722753	0.932788184	-2.643468837	0.000132241	0.001378666	PREDICTED: defensin-like protein 122 [Raphanus sativus]	-	-	-	-
MSTRG.58133	--	0.09	0.21	0.16	0.86	0.93	1.07	0	0	0	0	0.9533	0.1533	-2.636309381	0.00417324	0.033858344	-7.26052755	0.044025841	0.160691883	BnaC05g36830D [Brassica napus]	-	-	-	-
MSTRG.58135	--	1.24	0.58	0.26	0	0	0	9.62	3.15	5.03	5.9333	0	0.6933	9.437405312	1.63E-09	6.23E-08	3.097221808	1.54E-08	4.23E-07	Regulator of chromosome condensation (RCC1) family protein [Arabidopsis thaliana]	-	-	-	-
MSTRG.58227	--	6.99	5.89	6.02	1.71	1.4	1.13	6.61	5.93	5.78	6.1067	1.4133	6.3	2.156250065	7.52E-14	5.43E-12	-0.044966731	0.848439044	0.933052892	BnaC02g20670D [Brassica napus]	-	-	-	-
MSTRG.58232	APD1	0.78	1.17	1.23	1.2	1.59	1.92	0.06	0.26	0.23	0.1833	1.57	1.06	-0.566700294	0.905314131	0.994882214	-2.531523242	4.10E-06	6.52E-05	E3 ubiquitin-protein ligase APD1 isoform X2 [Brassica rapa]	-	-	-	-
MSTRG.58335	--	0	0.05	0.15	0.02	0.04	0.08	0.51	0.38	0.56	0.4833	0.0467	0.0667	0.514573173	0.501713008	0.880236894	2.857980995	0.000793933	0.006347532	LOW QUALITY PROTEIN: pentatricopeptide repeat-containing protein At4g19440, chloroplastic-like [Brassica rapa]	-	-	-	-
MSTRG.58406	API5	2.7	3.65	3.15	5.73	8.64	8.61	1.08	1.65	2.15	1.6267	7.66	3.1667	-1.274379379	0.000319615	0.003873139	-0.961046366	0.002547185	0.016866141	BnaC05g22070D [Brassica napus]	-	-	-	-
MSTRG.58480	--	0.55	0.39	0.33	0.05	0.15	0.12	0.59	1.73	1.91	1.41	0.1067	0.4233	1.988684687	0.00063231	0.006966216	1.735829166	0.001321711	0.009790215	Reverse transcriptase domain [Arabidopsis thaliana x Arabidopsis arenosa]	-	-	-	-
MSTRG.58537	--	3.08	3.72	3.49	6.02	7.78	5.78	0.46	1.05	0.91	0.8067	6.5267	3.43	-0.928137783	0.079031518	0.319823912	-2.08816403	3.51E-09	1.11E-07	lon protease 2 [Brassica rapa]	-	GO:0009532//plastid stroma	GO:0042623//ATPase activity, coupled	GO:0006605//protein targeting;GO:0006952//defense response;GO:0009755//hormone-mediated signaling pathway;GO:0009863//salicylic acid mediated signaling pathway;GO:0010468//regulation of gene expression;GO:0031399//regulation of protein modification process;GO:0035556//intracellular signal transduction;GO:0042743//hydrogen peroxide metabolic process;GO:0043067//regulation of programmed cell death;…
MSTRG.58572	RAP2-2	0.73	0.7	0.64	0.48	0.84	1.36	0.29	0.21	0.14	0.2133	0.8933	0.69	-0.372602233	0.605866681	0.932788184	-1.693486957	0.008654434	0.045639345	BnaC07g48430D [Brassica napus]	-	GO:0016020//membrane;GO:0043231//intracellular membrane-bounded organelle	GO:0005488//binding	GO:0001666//response to hypoxia;GO:0010467//gene expression;GO:0034645//cellular macromolecule biosynthetic process;GO:0042221//response to chemical;GO:0044238//primary metabolic process;GO:0044763//single-organism cellular process;GO:0050789//regulation of biological process
MSTRG.58575	--	0.25	0.4	0.4	0.28	0.37	0.35	0	0	0	0	0.3333	0.35	0.070389328	0.273645401	0.67395079	-8.451211112	0.000138848	0.001437501	BnaC07g15710D [Brassica napus]	-	GO:0031301//integral component of organelle membrane;GO:0044434//chloroplast part	GO:0005488//binding	GO:0006351//transcription, DNA-templated;GO:0006950//response to stress;GO:0009314//response to radiation
MSTRG.58582	--	1.8	2.82	2.47	4.79	8.09	6.37	1.03	2.55	2.12	1.9	6.4167	2.3633	-1.441000913	0.004841085	0.038107399	-0.314823708	0.63644127	0.883771917	-	-	-	-	-
MSTRG.58633	GSVIVT00026920001	0.14	0.32	0.44	1.65	1.52	1.47	0	0	0	0	1.5467	0.3	-2.366127899	9.59E-05	0.001343251	-8.22881869	0.000246446	0.002352811	PREDICTED: probable polygalacturonase [Brassica oleracea var. oleracea] [Brassica oleracea]	-	GO:0030312//external encapsulating structure;GO:0031224//intrinsic component of membrane	GO:0004553//hydrolase activity, hydrolyzing O-glycosyl compounds	GO:0044238//primary metabolic process;GO:0045229//external encapsulating structure organization
MSTRG.58728	--	0.39	0.51	0.24	1.93	1.66	1.92	0.18	0.29	0.21	0.2267	1.8367	0.38	-2.273018494	0.000208265	0.002670899	-0.745427173	0.357514283	0.666542482	electron transfer flavoprotein subunit alpha, mitochondrial [Vitis riparia]	-	-	-	-
MSTRG.58779	--	0	0.14	0.07	0	0.06	0	26.77	1.06	2.5	10.11	0.02	0.07	1.807354922	0.416068227	0.819038681	7.17421236	2.57E-05	0.00033236	BnaAnng04230D [Brassica napus]	-	-	-	-
MSTRG.58792	--	1.92	1.6	3.2	2.64	3.94	4.52	0.65	0.22	0.13	0.3333	3.7	2.24	-0.724026538	0.717172585	0.954998406	-2.748461233	7.18E-05	0.000816806	hypothetical protein F2Q70_00026013 [Brassica cretica]	-	-	-	-
MSTRG.58794	--	2.1	3.45	4.63	3.31	5.34	6.62	0.13	0.71	0.46	0.4333	5.09	3.3933	-0.584962501	0.957979078	0.994882214	-2.969154033	1.38E-08	3.84E-07	BnaC07g15840D [Brassica napus]	-	-	-	-
MSTRG.58806	--	3.47	3.62	7.76	1.69	4.23	5.05	0.3	0.36	0.6	0.42	3.6567	4.95	0.436899405	0.036511053	0.184279947	-3.558967292	1.42E-20	2.22E-18	hypothetical protein DY000_02022243 [Brassica cretica]	-	-	-	-
MSTRG.58812	RE2	0.41	0.73	1.08	1.43	2.02	1.79	0.15	0.27	0.09	0.17	1.7467	0.74	-1.239007135	0.108215179	0.39256181	-2.121990524	0.006359318	0.035530863	uncharacterized mitochondrial protein AtMg00810-like [Brassica rapa]	-	-	-	-
MSTRG.58819	--	0.36	1.01	0.88	0.99	2.48	2.93	0	0	0.08	0.0267	2.1333	0.75	-1.508146904	0.057259707	0.255547083	-4.813781191	3.26E-05	0.000410758	hypothetical protein IGI04_042754 [Brassica rapa subsp. trilocularis] [Brassica rapa]	-	-	-	-
MSTRG.5898	DGK4	0.18	0.15	0.21	0	0	0	1.49	2.08	0.97	1.5133	0	0.18	7.491853096	2.49E-05	0.000401984	3.071660985	7.61E-10	2.70E-08	diacylglycerol kinase 4 [Brassica rapa]	ko01100//Metabolic pathways;ko01110//Biosynthesis of secondary metabolites;ko00564//Glycerophospholipid metabolism;ko00561//Glycerolipid metabolism;ko04070//Phosphatidylinositol signaling system	-	-	GO:0009987//cellular process
MSTRG.58982	--	0	0	0	2.59	1.58	0.74	0	0	0	0	1.6367	0	-10.67654481	3.33E-07	8.12E-06	0	1	1	Harbinger transposase-derived protein [Arabidopsis thaliana x Arabidopsis arenosa]	-	-	-	-
MSTRG.59134	--	0.6	0.56	0.54	1.5	1.63	1.71	0.18	0.37	0.06	0.2033	1.6133	0.5667	-1.509472301	0.000267068	0.00330788	-1.478653599	0.031288128	0.124766005	BnaCnng11820D [Brassica napus]	-	-	-	-
MSTRG.59344	NAT12	6.07	6.7	7.6	7.85	9.96	11.09	2.18	2.84	2.45	2.49	9.6333	6.79	-0.504623512	0.461184458	0.856989515	-1.447265832	2.19E-12	1.17E-10	PREDICTED: nucleobase-ascorbate transporter 12 isoform X1 [Brassica oleracea var. oleracea] [Brassica oleracea]	-	GO:0009536//plastid;GO:0016020//membrane	GO:0005345//purine nucleobase transmembrane transporter activity;GO:0005350//pyrimidine nucleobase transmembrane transporter activity;GO:0008324//cation transmembrane transporter activity	GO:0006812//cation transport;GO:0061488//adenine import into cell;GO:0061489//guanine import into cell;GO:0098739//import across plasma membrane
MSTRG.59351	--	0.33	0.33	0.65	0.51	0.87	0.73	1.25	0.87	0.94	1.02	0.7033	0.4367	-0.687676187	0.860520852	0.98579965	1.223964841	0.007856352	0.0421446	BnaC03g57790D [Brassica napus]	ko03420//Nucleotide excision repair;ko03440//Homologous recombination;ko03030//DNA replication;ko03430//Mismatch repair	-	-	-
MSTRG.59382	--	0.56	0.56	0.47	0.47	1.15	0.99	1.22	1.01	1.45	1.2267	0.87	0.53	-0.715023041	0.852321919	0.981690777	1.210679001	0.000561127	0.004743249	BnaUnng00720D [Brassica napus]	-	-	-	-
MSTRG.59415	--	0.79	0.39	0.98	0.44	0.56	0.26	0	0	0	0	0.42	0.72	0.777607579	0.05337644	0.243527964	-9.491853096	8.94E-05	0.000985342	hypothetical protein F2Q69_00014875 [Brassica cretica]	-	-	-	-
MSTRG.59430	--	0.14	0.24	0.2	1.01	0.78	1.8	0.04	0.08	0	0.04	1.1967	0.1933	-2.629859039	0.000131575	0.001779093	-2.273018494	0.097569128	0.285379332	BnaA07g03900D [Brassica napus]	-	-	-	-
MSTRG.59459	--	0.85	0.63	0.58	1.34	1.87	1.45	0.06	0.12	0.12	0.1	1.5533	0.6867	-1.177685617	0.046309987	0.219652225	-2.779609932	3.26E-07	6.81E-06	BnaA09g22890D [Brassica napus]	-	-	-	-
MSTRG.59475	scw1	0	0.05	0.05	0	0	0	0.93	1.86	1.75	1.5133	0	0.0333	5.058893689	0.230829876	0.615558804	5.504620392	1.58E-10	6.27E-09	BnaC01g32160D [Brassica napus]	-	-	GO:0097159//organic cyclic compound binding	-
MSTRG.59500	--	3.65	4.08	4.34	10.86	12.89	10.54	0.48	1.32	1.11	0.97	11.43	4.0233	-1.506362228	5.76E-06	0.000108013	-2.052334618	2.43E-06	4.10E-05	Aspartic peptidase domain superfamily [Arabidopsis suecica]	-	-	-	-
MSTRG.5951	CKX3	3.58	3.76	3.5	6.65	7.84	7.78	0.3	0.58	0.35	0.41	7.4233	3.6133	-1.038736801	0.006888655	0.05077072	-3.139634536	1.15E-17	1.26E-15	cytokinin dehydrogenase 3 [Brassica rapa]	ko00908//Zeatin biosynthesis	GO:0043231//intracellular membrane-bounded organelle	GO:0000166//nucleotide binding;GO:0016616//oxidoreductase activity, acting on the CH-OH group of donors, NAD or NADP as acceptor;GO:0016641//oxidoreductase activity, acting on the CH-NH2 group of donors, oxygen as acceptor;GO:0016645//oxidoreductase activity, acting on the CH-NH group of donors	GO:0009690//cytokinin metabolic process;GO:0044710//single-organism metabolic process
MSTRG.59580	CYP71B16	0.09	0.41	0.97	0	0	0.06	1.32	0.35	1.36	1.01	0.02	0.49	4.614709844	0.004753364	0.037559746	1.043501639	0.220698324	0.495482679	cytochrome P450 71B17 [Brassica napus]	-	-	-	-
MSTRG.59590	--	0.41	0.86	0.56	1.7	3.38	3.13	0.08	0.08	0.19	0.1167	2.7367	0.61	-2.165538573	8.53E-06	0.000153376	-2.386416821	0.000373648	0.003356508	Harbinger transposase-derived protein [Arabidopsis suecica]	-	-	-	-
MSTRG.59661	--	1.94	1.98	1.44	1.63	2.48	2.19	6.54	3.12	2.87	4.1767	2.1	1.7867	-0.233118828	0.326642017	0.735773841	1.225081509	0.004880733	0.028677751	hypothetical protein DY000_02059266 [Brassica cretica]	-	-	-	-
MSTRG.59666	--	0.97	1.49	1.26	2.2	5.22	4.2	0	0.11	0.1	0.07	3.8733	1.24	-1.643235542	0.000797551	0.008500431	-4.146841388	3.53E-10	1.33E-08	BnaA09g22890D [Brassica napus]	-	-	-	-
MSTRG.59714	--	0.88	0.92	1.3	1.44	3.49	3.31	0.16	0.18	0.22	0.1867	2.7467	1.0333	-1.410376122	0.030680533	0.162046911	-2.468769483	2.29E-05	0.000299715	hypothetical protein F2Q68_00025508 [Brassica cretica]	-	-	-	-
MSTRG.59715	--	15.24	22.03	23.07	23.62	46.24	44.66	1.61	3.31	2.64	2.52	38.1733	20.1133	-0.924412974	0.13014512	0.441715697	-2.996656557	3.06E-24	7.08E-22	hypothetical protein DY000_02031378 [Brassica cretica]	-	-	-	-
MSTRG.59716	--	0.78	1.36	1.55	2.21	1.95	2.98	0.07	0.12	0.06	0.0833	2.38	1.23	-0.952303258	0.502462458	0.880515946	-3.883620816	0.000848787	0.006728281	hypothetical protein F2Q68_00025514 [Brassica cretica]	-	-	-	-
MSTRG.59737	--	4.43	5.05	5.37	3.67	4.78	5.14	0.91	2.88	1.82	1.87	4.53	4.95	0.127917475	0.000889623	0.009325318	-1.404390255	0.001640895	0.011713465	unnamed protein product [Brassica napus]	-	-	-	-
MSTRG.59774	--	1.78	2.91	2.79	5.38	7.33	5.66	0.29	1.08	0.74	0.7033	6.1233	2.4933	-1.296241451	0.003142132	0.026852974	-1.825795271	0.000362341	0.003270542	hypothetical protein F2Q70_00020065 [Brassica cretica]	-	-	-	-
MSTRG.59785	DUF3	0.2	0	0.17	0.14	0.42	0.31	0	0	0	0	0.29	0.1233	-1.23349013	0.482295704	0.868806323	-6.94641896	0.005410093	0.03122357	DUF724 domain-containing protein 6-like [Brassica rapa]	-	GO:0043231//intracellular membrane-bounded organelle	-	GO:0003002//regionalization;GO:0006342//chromatin silencing;GO:0034968//histone lysine methylation;GO:0035194//posttranscriptional gene silencing by RNA;GO:0048449//floral organ formation;GO:0048507//meristem development;GO:0070918//production of small RNA involved in gene silencing by RNA;GO:2000026//regulation of multicellular organismal development
MSTRG.59808	--	0	0	0.03	0.96	2.33	0.96	0	0	0.06	0.02	1.4167	0.01	-7.14635653	1.48E-06	3.15E-05	1	0.83174848	0.931138542	BnaC03g66020D [Brassica napus]	ko03420//Nucleotide excision repair;ko03440//Homologous recombination;ko03030//DNA replication;ko03430//Mismatch repair	-	-	-
MSTRG.59840	TPLATE	1.04	0.64	0.51	0.36	0.41	0.41	1.71	1.84	1.96	1.8367	0.3933	0.73	0.89214401	0.010196598	0.069240083	1.331121449	0.001670059	0.011887313	protein TPLATE-like [Brassica napus]	-	GO:0005911//cell-cell junction;GO:0016020//membrane;GO:0043232//intracellular non-membrane-bounded organelle;GO:0044444//cytoplasmic part	-	GO:0016192//vesicle-mediated transport;GO:0030243//cellulose metabolic process;GO:0048229//gametophyte development
MSTRG.59845	HMA5	0.23	0.42	0.46	0.44	1.14	0.99	0.08	0.06	0.11	0.0833	0.8567	0.37	-1.211208683	0.172513993	0.522219002	-2.150559677	0.001839696	0.012900871	PREDICTED: probable copper-transporting ATPase HMA5 [Brassica oleracea var. oleracea] [Brassica oleracea]	ko04016//MAPK signaling pathway - plant	GO:0031224//intrinsic component of membrane	GO:0032550//purine ribonucleoside binding;GO:0043682//copper-transporting ATPase activity;GO:0046914//transition metal ion binding	GO:0010038//response to metal ion;GO:0035434//copper ion transmembrane transport;GO:0061687//detoxification of inorganic compound
MSTRG.59896	--	1.53	1.38	2.46	2.28	3.55	3.06	0.44	0.65	0.52	0.5367	2.9633	1.79	-0.727261331	0.486918091	0.872745996	-1.7378614	0.000391142	0.00348948	BnaA02g29480D [Brassica napus]	-	-	GO:0005488//binding	-
MSTRG.59904	--	0.06	0	0	1.53	2.4	1.75	0	0	0	0	1.8933	0.02	-6.564784619	4.67E-06	8.93E-05	-4.321928095	0.844666575	0.931138542	BnaC01g41410D [Brassica napus]	-	-	-	-
MSTRG.59948	--	1.2	1.4	2.59	2.94	4.74	4.9	0.06	0.05	0.25	0.12	4.1933	1.73	-1.277325479	0.057656168	0.256798365	-3.849665727	3.80E-06	6.11E-05	nucleolin 1-like [Brassica napus]	-	-	-	-
MSTRG.60026	--	0.38	1.32	0.35	2.77	7.11	2.89	0.1	0	0.17	0.09	4.2567	0.6833	-2.63906271	0.002196227	0.01991275	-2.924592597	0.042642532	0.157114834	BnaC05g26530D [Brassica napus]	-	-	-	-
MSTRG.60036	--	5.53	7.68	10.84	16.99	15.09	16.03	0.21	0.74	0.18	0.3767	16.0367	8.0167	-1.000299905	0.035667503	0.181118779	-4.411642216	2.61E-19	3.51E-17	Harbinger transposase-derived protein [Arabidopsis suecica]	-	-	-	-
MSTRG.60108	CPK17	2.23	2.17	1.76	2.28	2.59	1.65	0.14	0.28	0.26	0.2267	2.1733	2.0533	-0.081941614	0.191946591	0.555773894	-3.179323699	1.20E-06	2.18E-05	calcium-dependent protein kinase 17 isoform X3 [Eutrema salsugineum]	ko04626//Plant-pathogen interaction	-	-	-
MSTRG.60114	SSL9	0.12	0.14	0.04	0.07	0	0	9.15	7.41	7.89	8.15	0.0233	0.1	2.099535674	0.13704792	0.456589022	6.348728154	5.05E-30	2.11E-27	protein STRICTOSIDINE SYNTHASE-LIKE 9 [Brassica rapa]	-	GO:0009536//plastid	GO:0016843//amine-lyase activity	GO:0009411//response to UV;GO:0009812//flavonoid metabolic process;GO:0009820//alkaloid metabolic process;GO:0016129//phytosteroid biosynthetic process;GO:0034285//response to disaccharide
MSTRG.60332	--	5.27	5.11	5.39	5.51	7.9	7.83	22.94	15.78	16.95	18.5567	7.08	5.2567	-0.429601106	0.322616186	0.731659075	1.819717423	1.03E-17	1.14E-15	hypothetical protein F2Q69_00054940 [Brassica cretica]	-	-	-	-
MSTRG.60333	--	0.06	0.12	0.12	0	0.1	0.37	1.78	0.57	0.58	0.9767	0.1567	0.1	-0.647698256	0.984796831	0.995155354	3.287866259	0.000870885	0.00686628	-	-	-	-	-
MSTRG.60418	DOF1.3	6.44	6.34	9.71	1.87	1.88	3.38	18.22	15.19	19.26	17.5567	2.3767	7.4967	1.657309679	3.33E-19	5.23E-17	1.227697798	2.46E-12	1.30E-10	BnaC05g50970D [Brassica napus]	-	GO:0043231//intracellular membrane-bounded organelle	GO:0001071//nucleic acid binding transcription factor activity;GO:0003676//nucleic acid binding	GO:0010468//regulation of gene expression;GO:0048506//regulation of timing of meristematic phase transition
MSTRG.60485	LIGB	0.1	0.18	0.08	0.85	0.44	0.4	0.44	0.17	0.12	0.2433	0.5633	0.12	-2.230954435	0.005903621	0.044781074	1.019899557	0.151110224	0.385797667	BnaC01g27340D [Brassica napus]	-	-	-	-
MSTRG.60513	--	0.3	0.31	0.33	1.4	2.18	2.34	0	0	0	0	1.9733	0.3133	-2.654864514	4.33E-08	1.27E-06	-8.291554446	1.77E-05	0.000239688	NYN domain limkain-b1-type [Arabidopsis thaliana x Arabidopsis arenosa]	-	GO:0043231//intracellular membrane-bounded organelle	-	GO:0008152//metabolic process
MSTRG.60550	--	4.32	4.26	3.52	2.11	0.85	0.78	13.14	7.23	5.29	8.5533	1.2467	4.0333	1.693896872	2.28E-06	4.64E-05	1.084514123	0.003844017	0.023593683	-	-	-	-	-
MSTRG.60560	IGHMBP2	4.99	4.55	5.84	9.95	13	11.17	1.91	2.56	3.02	2.4967	11.3733	5.1267	-1.149562143	7.82E-06	0.000141932	-1.03801788	4.04E-06	6.45E-05	PREDICTED: DNA-binding protein SMUBP-2 [Brassica oleracea var. oleracea] [Brassica oleracea]	-	GO:0009526//plastid envelope;GO:0009532//plastid stroma	GO:0003676//nucleic acid binding;GO:0017111//nucleoside-triphosphatase activity;GO:0032550//purine ribonucleoside binding	GO:0006787//porphyrin-containing compound catabolic process
MSTRG.60632	--	0.33	0.3	0.4	0.05	0	0.08	5.05	3.01	5.36	4.4733	0.0433	0.3433	2.986060809	0.004207842	0.034073748	3.703668429	3.02E-15	2.41E-13	PREDICTED: glucose and ribitol dehydrogenase homolog 1-like [Raphanus sativus]	-	-	-	-
MSTRG.60643	At1g65710	0.09	0.12	0.14	1.74	4.21	2.42	0.08	0	0	0.0267	2.79	0.1167	-4.579800796	3.54E-17	4.15E-15	-2.129283017	0.162410161	0.405228645	BnaCnng25400D [Brassica napus]	-	-	-	-
MSTRG.60765	RPS6	0.59	0.71	0.68	1.05	1.14	0.8	0.1	0.26	0.24	0.2	0.9967	0.66	-0.594645054	0.972868377	0.994882214	-1.722466024	0.00020749	0.002032421	disease resistance protein RPS6-like [Brassica napus]	-	GO:0044424//intracellular part	-	GO:0050896//response to stimulus
MSTRG.60818	--	1.57	1.11	2.13	0.95	1.3	1.6	3.72	1.92	4.09	3.2433	1.2833	1.6033	0.321178448	0.005545812	0.042564	1.016402911	0.002067687	0.014182758	PREDICTED: LOW QUALITY PROTEIN: uncharacterized F-box/LRR-repeat protein C02F5.7 [Brassica oleracea var. oleracea] [Brassica oleracea]	-	-	-	GO:0006952//defense response
MSTRG.60884	RF45	0.17	0.37	0.33	1.12	0.8	0.89	0.07	0.03	0.15	0.0833	0.9367	0.29	-1.691482824	0.004050657	0.033014737	-1.799087306	0.061424189	0.205545181	PREDICTED: probable disease resistance protein RXW24L [Brassica oleracea var. oleracea] [Brassica oleracea]	-	GO:0016020//membrane	-	GO:0006950//response to stress;GO:0009620//response to fungus;GO:0010033//response to organic substance
MSTRG.60923	--	2.35	1.94	2.66	0.85	1.05	1.54	8.99	5.52	10.71	8.4067	1.1467	2.3167	1.014604413	1.51E-07	3.96E-06	1.859483393	2.92E-12	1.52E-10	unnamed protein product [Brassica napus]	-	-	-	-
MSTRG.61000	At2g21590	3.22	2.8	2.34	3.91	4.41	3.6	0.59	1.04	1.24	0.9567	3.9733	2.7867	-0.511809388	0.706821816	0.95472016	-1.542452205	6.74E-05	0.000772438	PREDICTED: probable glucose-1-phosphate adenylyltransferase large subunit, chloroplastic [Brassica oleracea var. oleracea] [Brassica oleracea]	ko01100//Metabolic pathways;ko01110//Biosynthesis of secondary metabolites;ko00500//Starch and sucrose metabolism;ko00520//Amino sugar and nucleotide sugar metabolism	GO:0009536//plastid	GO:0032550//purine ribonucleoside binding;GO:0070566//adenylyltransferase activity	GO:0005977//glycogen metabolic process;GO:0005982//starch metabolic process;GO:0043094//cellular metabolic compound salvage
MSTRG.61065	--	0.2	0.36	0.13	1.68	1.63	1.78	0.03	0.06	0.06	0.05	1.6967	0.23	-2.882997389	3.09E-09	1.13E-07	-2.201633861	0.010176186	0.052020168	hypothetical protein F2Q70_00008206 [Brassica cretica]	-	-	-	-
MSTRG.61082	SRK2J	0.34	0.16	0.26	1.32	0.67	0.22	0.84	1.29	1.23	1.12	0.7367	0.2533	-1.539975046	0.280120887	0.68195255	2.144389909	0.000898599	0.007048252	PREDICTED: serine/threonine-protein kinase SRK2J [Brassica oleracea var. oleracea] [Brassica oleracea]	ko04075//Plant hormone signal transduction;ko04016//MAPK signaling pathway - plant	-	-	-
MSTRG.61087	YLMG1-2	11.03	9.94	11.36	14.7	18.72	16.53	3.41	5.99	6.15	5.1833	16.65	10.7767	-0.627611171	0.825870747	0.97358954	-1.055958927	6.35E-05	0.0007336	BnaA08g03870D [Brassica napus]	-	GO:0009526//plastid envelope;GO:0034357//photosynthetic membrane	GO:0016301//kinase activity;GO:0032550//purine ribonucleoside binding	GO:0003006//developmental process involved in reproduction;GO:0006071//glycerol metabolic process;GO:0006221//pyrimidine nucleotide biosynthetic process;GO:0009062//fatty acid catabolic process;GO:0009617//response to bacterium;GO:0009628//response to abiotic stimulus;GO:0009636//response to toxic substance;GO:0009658//chloroplast organization;GO:0052646//alditol phosphate metabolic process
MSTRG.61098	--	0	0	0	0	0	0	17.53	5.55	10.37	11.15	0	0	0	1	1	13.44475609	2.18E-12	1.16E-10	BnaA04g29260D [Brassica napus]	-	-	-	-
MSTRG.61116	--	0.03	0.05	0	0.02	0	0	0.76	0.52	0.98	0.7533	0.0067	0.0267	2	0.386185261	0.79449706	4.820178962	6.69E-07	1.30E-05	hypothetical protein F2Q68_00027297 [Brassica cretica]	-	-	-	-
MSTRG.61119	--	1.57	1.77	1.57	1.3	0.88	1.17	4.29	3.1	3.8	3.73	1.1167	1.6367	0.551561929	0.000308197	0.003753229	1.188415107	8.06E-07	1.53E-05	PREDICTED: F-box protein At2g35280-like [Camelina sativa]	-	-	-	-
MSTRG.61182	--	0	0	0.06	0.59	2.09	1.21	0	0	0	0	1.2967	0.02	-6.018663844	0.001730262	0.016318221	-4.321928095	1	1	protein ALP1-like [Brassica napus]	-	-	-	-
MSTRG.61228	AtMg00310	2.73	2.83	2.44	1.65	0.84	1.45	1.59	3.72	3.36	2.89	1.3133	2.6667	1.02180437	7.49E-09	2.52E-07	0.116031993	0.499901067	0.796383767	Reverse transcriptase zinc-binding domain [Arabidopsis thaliana x Arabidopsis arenosa]	-	-	-	-
MSTRG.61267	--	23.44	20.37	18.07	12.25	8.54	9.11	18.03	21.31	23.35	20.8967	9.9667	20.6267	1.049327712	4.16E-14	3.13E-12	0.018762133	0.568701874	0.844676626	BnaCnng43480D [Brassica napus]	-	-	-	-
MSTRG.61316	--	0.92	0.49	0.75	0.93	1.04	1.68	0	0.14	0.18	0.1067	1.2167	0.72	-0.756865152	0.774267922	0.97358954	-2.754887502	0.004781794	0.02817806	replication protein A 70 kDa DNA-binding subunit C-like [Brassica rapa]	ko03420//Nucleotide excision repair;ko03440//Homologous recombination;ko03030//DNA replication;ko03430//Mismatch repair	GO:0005911//cell-cell junction	-	-
MSTRG.61376	--	2.49	2.88	2.92	3.9	7.64	8.6	0.66	1.7	1.24	1.2	6.7133	2.7633	-1.280619677	0.007375964	0.053657365	-1.203375195	0.001848201	0.012949031	Harbinger transposase-derived protein [Arabidopsis suecica]	-	-	-	-
MSTRG.61410	SPH5	6.41	11.34	10.3	28.41	45.84	37.69	0.32	0.97	0.45	0.58	37.3133	9.35	-1.996652977	2.60E-14	2.02E-12	-4.01084156	4.95E-23	1.02E-20	Harbinger transposase-derived protein [Arabidopsis suecica]	-	-	-	-
MSTRG.61459	--	1.36	0.86	1.05	0.59	0.68	1.66	0	0	0.09	0.03	0.9767	1.09	0.158389971	0.090603275	0.349613761	-5.183221824	2.95E-08	7.64E-07	BnaC01g21450D [Brassica napus]	ko03420//Nucleotide excision repair;ko03440//Homologous recombination;ko03030//DNA replication;ko03430//Mismatch repair	-	-	-
MSTRG.61492	--	6.25	6.14	7.47	3.27	2.74	3.67	10.53	7.37	9.09	8.9967	3.2267	6.62	1.03678667	7.87E-11	3.68E-09	0.442559354	0.022612049	0.096943629	hypothetical protein DY000_02022875 [Brassica cretica]	-	-	-	-
MSTRG.61524	--	0.34	0.57	0.75	0.23	0.49	0.64	2.78	1.76	2.23	2.2567	0.4533	0.5533	0.28757659	0.244711191	0.635264913	2.027972592	7.90E-05	0.000885416	BnaC03g54760D [Brassica napus]	-	-	-	-
MSTRG.6156	OPT8	0.09	0.05	0	0.71	0.42	0.42	1.18	0.29	0.66	0.71	0.5167	0.0467	-3.468769483	0.000551025	0.006200056	3.927354698	6.23E-06	9.49E-05	oligopeptide transporter 8 [Brassica rapa]	-	GO:0031224//intrinsic component of membrane	GO:0015197//peptide transporter activity	GO:0003006//developmental process involved in reproduction;GO:0008104//protein localization;GO:0015833//peptide transport;GO:0044763//single-organism cellular process
MSTRG.61597	At2g29320	1.07	0.51	1.23	0.13	0.17	0.57	0.55	0.33	0.58	0.4867	0.29	0.9367	1.691482824	0.000312762	0.003800788	-0.944601761	0.117916346	0.325405874	tropinone reductase homolog At2g29310 isoform X1 [Brassica rapa]	ko01100//Metabolic pathways;ko01110//Biosynthesis of secondary metabolites;ko00960//Tropane, piperidine and pyridine alkaloid biosynthesis	-	GO:0003824//catalytic activity	GO:0000041//transition metal ion transport;GO:0001101//response to acid chemical;GO:0005982//starch metabolic process;GO:0005984//disaccharide metabolic process;GO:0006739//NADP metabolic process;GO:0009267//cellular response to starvation;GO:0009628//response to abiotic stimulus;GO:0009893//positive regulation of metabolic process;GO:0010038//response to metal ion;GO:0015698//inorganic anion tra…
MSTRG.6163	PBE2	1.07	1.05	1.71	1.41	1.24	1.1	4.63	2.08	2.68	3.13	1.25	1.2767	0.030453797	0.119389317	0.417775815	1.293780766	0.000719951	0.005848871	PREDICTED: proteasome subunit beta type-5-B-like [Raphanus sativus]	ko03050//Proteasome	GO:0043231//intracellular membrane-bounded organelle;GO:0043234//protein complex	GO:0004175//endopeptidase activity	GO:0010038//response to metal ion;GO:0019941//modification-dependent protein catabolic process
MSTRG.61728	CDT1A	0.79	0.97	1.13	1.17	1.46	1.13	0.31	0.44	0.49	0.4133	1.2533	0.9633	-0.379663169	0.473198222	0.863581532	-1.220729372	0.006818819	0.03760669	PREDICTED: CDT1-like protein a, chloroplastic [Brassica oleracea var. oleracea] [Brassica oleracea]	-	GO:0009536//plastid	GO:0004674//protein serine/threonine kinase activity;GO:0019900//kinase binding	GO:0006260//DNA replication;GO:0006637//acyl-CoA metabolic process;GO:0009657//plastid organization;GO:0016458//gene silencing;GO:0034968//histone lysine methylation;GO:0048580//regulation of post-embryonic development;GO:0051052//regulation of DNA metabolic process;GO:1901990//regulation of mitotic cell cycle phase transition
MSTRG.61762	GSTT2	0.54	1	0.33	2.52	2.54	1.96	0.02	0.1	0.12	0.08	2.34	0.6233	-1.90843276	0.000394074	0.004636102	-2.961931959	7.42E-05	0.000840205	Harbinger transposase-derived protein [Arabidopsis suecica]	-	-	-	-
MSTRG.61811	--	1.09	1.83	1.74	4.21	4.27	4.15	0.25	0.68	0.36	0.43	4.21	1.5533	-1.438452779	0.000269579	0.00333292	-1.852958889	0.000167989	0.001693103	Zinc finger CCHC-type superfamily [Arabidopsis thaliana x Arabidopsis arenosa]	-	-	-	-
MSTRG.61818	AIP1	0.04	0.1	0.04	0.06	0.13	0.04	0.42	0.46	0.91	0.5967	0.0767	0.06	-0.353636955	0.851918379	0.981504881	3.313890776	3.63E-06	5.85E-05	protein phosphatase 2C 3 [Brassica napus]	ko04075//Plant hormone signal transduction;ko04016//MAPK signaling pathway - plant	GO:0031090//organelle membrane;GO:0043231//intracellular membrane-bounded organelle;GO:0044444//cytoplasmic part	GO:0004721//phosphoprotein phosphatase activity;GO:0005261//cation channel activity;GO:0043169//cation binding	GO:0006464//cellular protein modification process;GO:0006972//hyperosmotic response;GO:0009657//plastid organization;GO:0009787//regulation of abscisic acid-activated signaling pathway;GO:0009937//regulation of gibberellic acid mediated signaling pathway;GO:0010029//regulation of seed germination;GO:0010162//seed dormancy process;GO:0010260//organ senescence;GO:0034220//ion transmembrane transpor…
MSTRG.61855	DOR	0.92	0.83	1.22	1.41	2.66	1.95	0.46	0.5	0.29	0.4167	2.0067	0.99	-1.019300556	0.148464259	0.478214044	-1.248534836	0.005496803	0.031625611	PREDICTED: F-box protein DOR-like [Brassica oleracea var. oleracea] [Brassica oleracea]	-	-	GO:0005488//binding	GO:0009414//response to water deprivation;GO:0009787//regulation of abscisic acid-activated signaling pathway
MSTRG.61926	TERT	17.05	17.9	16.34	30.49	39.75	34.76	6.28	11.89	9.62	9.2633	35	17.0967	-1.033639851	0.000932699	0.009702295	-0.884111737	0.002730462	0.017833946	telomerase reverse transcriptase isoform X3 [Brassica rapa]	-	-	GO:0003964//RNA-directed DNA polymerase activity;GO:0005488//binding	GO:0006278//RNA-dependent DNA replication;GO:0006997//nucleus organization;GO:0051640//organelle localization
MSTRG.61958	SPH11	0.09	1.89	2.08	6.14	14.45	12.07	0	0	0	0	10.8867	1.3533	-3.007973158	2.34E-05	0.000381113	-10.40230151	0.000242151	0.002318751	BnaC04g43640D [Brassica napus]	-	-	-	-
MSTRG.61960	SPH11	23.87	43.16	45.53	102.29	184.82	131.48	0	0.27	0.06	0.11	139.53	37.52	-1.894843613	8.41E-10	3.36E-08	-8.414012494	5.51E-31	2.58E-28	BnaC04g43640D [Brassica napus]	-	-	-	-
MSTRG.61961	SPH11	2.05	4.06	3.95	8.94	19.62	15.75	0	0	0	0	14.77	3.3533	-2.139002022	1.97E-06	4.09E-05	-11.71138018	2.05E-09	6.76E-08	BnaC04g43640D [Brassica napus]	-	-	-	-
MSTRG.61981	NFD4	0.51	0.69	1.01	1.62	2.32	2.57	0.17	0.21	0.19	0.19	2.17	0.7367	-1.558611174	0.003020692	0.026010111	-1.955012545	0.000713519	0.00580676	protein NUCLEAR FUSION DEFECTIVE 4 [Brassica rapa]	-	-	-	-
MSTRG.62023	--	1.79	2.94	1.93	2.89	4.27	3.65	0.97	0.86	0.52	0.7833	3.6033	2.22	-0.698772441	0.77671499	0.97358954	-1.502861421	0.0023921	0.016017612	unnamed protein product [Brassica napus]	-	-	-	-
MSTRG.62086	--	1.31	1.58	1.63	5.19	12.66	8.69	0	0.21	0	0.07	8.8467	1.5067	-2.553773693	1.33E-05	0.000228292	-4.42786154	1.20E-06	2.19E-05	Neprosin activation peptide, partial [Arabidopsis suecica]	-	-	-	-
MSTRG.62239	--	0.79	1.14	1.05	0.22	0.07	0.25	8.36	6.44	7.32	7.3733	0.18	0.9933	2.464281018	0.000442706	0.005132253	2.89196715	2.60E-14	1.81E-12	Expressed protein [Arabidopsis thaliana]	-	GO:0016020//membrane	-	-
MSTRG.62264	--	0.4	1.3	0.31	1.99	1.59	1.4	4.11	0.72	3.62	2.8167	1.66	0.67	-1.308950241	0.270089797	0.669261865	2.07175584	0.004714349	0.027844936	BnaA04g22220D [Brassica napus]	-	-	-	-
MSTRG.62295	JAL23	0	0	0.05	0.29	0.68	0.31	2.96	0.63	1.66	1.75	0.4267	0.0167	-4.678071905	0.001994831	0.018388217	6.714245518	1.54E-08	4.25E-07	PREDICTED: jacalin-related lectin 22-like [Brassica oleracea var. oleracea] [Brassica oleracea]	-	GO:0005911//cell-cell junction;GO:0009536//plastid	GO:0005488//binding	GO:0006950//response to stress
MSTRG.62304	--	0.5	2.15	0.71	2	3.14	2.14	0	0.28	0.06	0.1133	2.4267	1.12	-1.115477217	0.396080862	0.802713586	-3.304854582	0.00573787	0.032719802	ORF-c [Brassica rapa]	-	-	-	-
MSTRG.62359	At3g50280	14.34	12.78	13.46	6.28	3.92	4.32	22.61	23.91	21.44	22.6533	4.84	13.5267	1.482727412	6.94E-19	1.03E-16	0.743916987	6.45E-07	1.26E-05	PREDICTED: uncharacterized acetyltransferase At3g50280-like [Brassica oleracea var. oleracea] [Brassica oleracea]	-	-	GO:0016747//transferase activity, transferring acyl groups other than amino-acyl groups	GO:0009628//response to abiotic stimulus
MSTRG.62503	--	1.83	1.41	1.68	2.84	3.5	4.43	0.33	0.62	0.78	0.5767	3.59	1.64	-1.130288029	0.075425307	0.309855929	-1.507886278	0.002192229	0.014911571	Ribonuclease H domain [Arabidopsis thaliana x Arabidopsis arenosa]	-	-	-	-
MSTRG.62634	--	11.23	8.62	12.36	4.3	4.02	4.47	11.34	13.74	9.32	11.4667	4.2633	10.7367	1.332492397	1.75E-19	2.81E-17	0.094899904	0.408329655	0.718449626	-	-	-	-	-
MSTRG.62660	At1g15757	1.68	1.23	1.27	0.7	1.69	0	0.51	0	0	0.17	0.7967	1.3933	0.806492324	0.121785488	0.423427577	-3.03493379	0.007472384	0.040493932	Molecular chaperone Hsp40/DnaJ family protein [Arabidopsis thaliana]	-	-	-	-
MSTRG.62662	At1g15757	28.89	39	34.34	37.1	45.42	30.99	8.91	7.52	8.64	8.3567	37.8367	34.0767	-0.151000776	0.012253478	0.080046148	-2.027784725	1.35E-18	1.67E-16	Molecular chaperone Hsp40/DnaJ family protein [Arabidopsis thaliana]	-	-	-	-
MSTRG.62664	--	11.39	18.93	14.72	23.18	28.68	18.1	2.36	3.21	2.2	2.59	23.32	15.0133	-0.635323462	0.878917844	0.993551609	-2.535220324	4.25E-14	2.89E-12	Molecular chaperone Hsp40/DnaJ family protein [Arabidopsis thaliana]	-	-	-	-
MSTRG.62677	UTR7	1.15	1.48	0.64	1.29	3.12	1.57	0.13	0.32	0.19	0.2133	1.9933	1.09	-0.870854849	0.625198345	0.932788184	-2.353146825	0.001151885	0.008706789	UDP-galactose/UDP-glucose transporter 7-like [Brassica napus]	-	-	-	GO:0015711//organic anion transport;GO:0015781//pyrimidine nucleotide-sugar transport;GO:0044763//single-organism cellular process
MSTRG.62683	ATTI7	2.18	1.8	2.07	4.28	4.6	3.12	0.19	0.33	0	0.1733	4	2.0167	-0.988027358	0.288464064	0.692270629	-3.540351614	0.000115452	0.001226496	BnaC04g48990D [Brassica napus]	-	-	-	GO:0006950//response to stress;GO:0009620//response to fungus;GO:0044262//cellular carbohydrate metabolic process;GO:0044723//single-organism carbohydrate metabolic process;GO:0044763//single-organism cellular process
MSTRG.62720	--	0.03	0.2	0.22	2.32	4.34	2.57	0	0	0	0	3.0767	0.15	-4.358333741	6.11E-13	3.86E-11	-7.22881869	0.018865076	0.084311835	unnamed protein product [Brassica napus]	-	-	-	-
MSTRG.6290	--	0.62	0.57	0.51	1.79	1.12	1.6	0	0.06	0.06	0.04	1.5033	0.5667	-1.407592687	0.135019638	0.452483505	-3.824428435	0.005650671	0.032332124	-	-	-	-	-
MSTRG.62959	--	0.77	0.47	0.79	1.04	1.07	0.59	4.12	2.7	4.16	3.66	0.9	0.6767	-0.41147968	0.681111086	0.944627003	2.435326422	2.46E-14	1.72E-12	transmembrane protein [Arabidopsis thaliana]	-	-	-	-
MSTRG.62963	--	9.48	7.94	11.6	10.84	7.6	9.68	35.81	17.99	25.68	26.4933	9.3733	9.6733	0.045450925	0.010653764	0.071740237	1.453544353	6.04E-08	1.47E-06	BnaC05g00740D [Brassica napus]	-	GO:0042579//microbody	-	GO:0000302//response to reactive oxygen species;GO:0043094//cellular metabolic compound salvage;GO:0051707//response to other organism
MSTRG.62973	--	0.14	0.06	0.06	0.06	0	0	3.81	1.76	2.55	2.7067	0.02	0.0867	2.115477217	0.222438192	0.603106536	4.964896199	8.21E-09	2.42E-07	PREDICTED: phosphatidylinositol 4-kinase gamma 3-like isoform X2 [Raphanus sativus]	-	-	-	-
MSTRG.62993	HFR1	0	0.11	0	0.54	1.03	0.71	0	0	0.03	0.01	0.76	0.0367	-4.373458396	0.000265846	0.003294738	-1.874469118	0.610821139	0.867149139	BnaC05g01110D [Brassica napus]	-	GO:0043231//intracellular membrane-bounded organelle;GO:0044444//cytoplasmic part	GO:0000989//transcription factor activity, transcription factor binding;GO:0001071//nucleic acid binding transcription factor activity;GO:0003676//nucleic acid binding;GO:0005515//protein binding	GO:0006779//porphyrin-containing compound biosynthetic process;GO:0007602//phototransduction;GO:0009630//gravitropism;GO:0009755//hormone-mediated signaling pathway;GO:0010017//red or far-red light signaling pathway;GO:0010029//regulation of seed germination;GO:0010099//regulation of photomorphogenesis;GO:0010467//gene expression;GO:0030522//intracellular receptor signaling pathway;GO:0044710//si…
MSTRG.6300	--	0.86	0.69	1.08	0.36	0.51	0.31	0.57	0.69	0.73	0.6633	0.3933	0.8767	1.15627594	0.002779468	0.024244738	-0.402294369	0.593924334	0.86033359	expressed protein [Arabidopsis lyrata subsp. lyrata] [Arabidopsis lyrata]	-	-	-	-
MSTRG.6302	--	0.1	0.18	0.14	0.08	0.2	0.04	1.48	1.13	0.45	1.02	0.1067	0.14	0.392317423	0.413328876	0.816812977	2.86507042	0.000351348	0.003185492	unnamed protein product [Brassica napus]	-	-	-	-
MSTRG.63029	--	0.49	0.45	0.25	0.23	0.33	0.8	1.33	1.03	1.94	1.4333	0.4533	0.3967	-0.192645078	0.631202877	0.932788184	1.853375086	0.002887755	0.018680447	BnaCnng70510D [Brassica napus]	-	-	-	-
MSTRG.63105	CRU4	6478.94	5672.45	5029.32	2782.69	662.42	1069.09	6733.33	8823.45	6456.68	7337.82	1504.7333	5726.9033	1.928247415	0.000626688	0.006911724	0.357596263	0.033487267	0.131219714	cruciferin cru4 subunit, partial [Brassica napus]	-	GO:0005783//endoplasmic reticulum	-	GO:0009409//response to cold;GO:0009639//response to red or far red light;GO:0009685//gibberellin metabolic process;GO:0009737//response to abscisic acid;GO:0009756//carbohydrate mediated signaling;GO:0009793//embryo development ending in seed dormancy;GO:0032446//protein modification by small protein conjugation;GO:0048507//meristem development;GO:0048580//regulation of post-embryonic developmen…
MSTRG.63106	CRU4	39.26	33.84	32.54	17.36	4.21	6.95	41.45	57.61	42.59	47.2167	9.5067	35.2133	1.88911032	0.000335319	0.004036556	0.423174395	0.019016298	0.08483427	cruciferin cru4 subunit, partial [Brassica napus]	-	GO:0005783//endoplasmic reticulum	-	GO:0009409//response to cold;GO:0009639//response to red or far red light;GO:0009685//gibberellin metabolic process;GO:0009737//response to abscisic acid;GO:0009756//carbohydrate mediated signaling;GO:0009793//embryo development ending in seed dormancy;GO:0032446//protein modification by small protein conjugation;GO:0048507//meristem development;GO:0048580//regulation of post-embryonic developmen…
MSTRG.63115	FAO1	2.15	1.88	1.74	1.09	1.58	1.63	4	4.6	4.15	4.25	1.4333	1.9233	0.424234659	8.51E-06	0.000153196	1.143854023	1.99E-08	5.35E-07	PREDICTED: long-chain-alcohol oxidase FAO1 [Brassica oleracea var. oleracea] [Brassica oleracea]	-	-	GO:0016899//oxidoreductase activity, acting on the CH-OH group of donors, oxygen as acceptor	GO:0006950//response to stress;GO:0044281//small molecule metabolic process
MSTRG.63337	--	6.25	8.26	7.33	12.47	16.7	20	0.68	2.61	1.88	1.7233	16.39	7.28	-1.170805499	0.000544819	0.006142045	-2.078736671	5.33E-07	1.06E-05	Harbinger transposase-derived protein [Arabidopsis suecica]	-	-	-	-
MSTRG.63344	At1g49360	0.25	0.2	0.51	0.36	0.81	0.54	2.22	1.13	0.78	1.3767	0.57	0.32	-0.832890014	0.711637175	0.95472016	2.105035471	0.000217201	0.002111326	PREDICTED: LOW QUALITY PROTEIN: F-box protein At1g49360-like [Brassica oleracea var. oleracea] [Brassica oleracea]	-	-	-	-
MSTRG.63427	CDC6B	2.79	2.97	2.05	3.23	2.84	3.02	0.14	1.03	0.89	0.6867	3.03	2.6033	-0.218957746	0.129779621	0.440967824	-1.922678211	0.000927199	0.007238708	BnaC05g05060D [Brassica napus]	-	GO:0043231//intracellular membrane-bounded organelle	GO:0036094//small molecule binding;GO:0097159//organic cyclic compound binding;GO:1901363//heterocyclic compound binding	GO:0006260//DNA replication;GO:0007049//cell cycle
MSTRG.63448	--	0.67	0.46	0.46	1.31	0.86	1.85	1.07	2.17	1.66	1.6333	1.34	0.53	-1.338168736	0.045537248	0.216890222	1.623754984	0.004127723	0.024973168	transcription factor BPE-like [Brassica napus]	-	-	-	-
MSTRG.63754	At3g04540	3.96	6.76	6.71	4.45	2.58	2.52	1.74	1.04	1.05	1.2767	3.1833	5.81	0.867999931	0.000491013	0.005611206	-2.186156272	1.79E-05	0.000241155	PREDICTED: defensin-like protein 49 [Camelina sativa]	-	-	-	-
MSTRG.63789	--	1.34	1.7	1.02	3.57	3.75	2.03	4.32	1.14	5.23	3.5633	3.1167	1.3533	-1.203486638	0.106619816	0.388582868	1.396710221	0.004984345	0.029199772	coiled-coil domain-containing protein 18 isoform X2 [Brassica rapa]	-	-	GO:0016740//transferase activity	GO:0006970//response to osmotic stress
MSTRG.6385	TPK3	0	0.02	0	0	0.02	0.02	0.38	0.3	0.32	0.3333	0.0133	0.0067	-1	0.981268853	0.994882214	5.64385619	0.000134973	0.001402706	two-pore potassium channel 3 [Eutrema salsugineum]	-	-	-	-
MSTRG.63889	--	0.1	0	0.64	0.25	0.16	0.58	1.28	1.78	1.36	1.4733	0.33	0.2467	-0.419903254	0.931588049	0.994882214	2.578449194	0.007122369	0.038968301	unnamed protein product [Brassica napus]	-	-	-	-
MSTRG.63900	At3g56120	0	0.05	0	0.7	1.25	0.61	0	0.05	0	0.0167	0.8533	0.0167	-5.678071905	0.000439779	0.005104831	0	0.96827226	0.984062148	tRNA (guanine(37)-N1)-methyltransferase 1 isoform X2 [Herrania umbratica]	-	GO:0044429//mitochondrial part	GO:0009019//tRNA (guanine-N1-)-methyltransferase activity	GO:0001510//RNA methylation;GO:0003006//developmental process involved in reproduction;GO:0006399//tRNA metabolic process;GO:0006464//cellular protein modification process;GO:0048580//regulation of post-embryonic development
MSTRG.6405	--	7.39	5.57	7.57	3.72	3.49	6.51	28.88	15.63	20.23	21.58	4.5733	6.8433	0.581453146	0.000155637	0.002063885	1.656923738	2.50E-09	8.13E-08	hypothetical protein IGI04_040385 [Brassica rapa subsp. trilocularis] [Brassica rapa]	-	-	-	-
MSTRG.64051	--	1.74	1.99	1.92	4.36	7.39	4.91	0.18	0.35	0.48	0.3367	5.5533	1.8833	-1.560065628	0.00963466	0.066287689	-2.483895575	0.000571739	0.004818535	hypothetical protein F2Q68_00022922 [Brassica cretica]	-	-	-	-
MSTRG.64072	NPF8.3	0.25	0.88	0.58	2.31	3.45	2.88	0.05	0.04	0.04	0.0433	2.88	0.57	-2.337034987	2.59E-06	5.22E-05	-3.717412797	2.60E-05	0.000335344	protein NRT1/ PTR FAMILY 8.3 [Brassica rapa]	-	-	-	-
MSTRG.64074	--	1.18	1.66	2.12	0.75	0.99	0.75	0.15	0.28	0.21	0.2133	0.83	1.6533	0.994194378	9.19E-05	0.001290935	-2.95419631	2.93E-06	4.84E-05	PREDICTED: protein XRI1-like [Raphanus sativus]	-	-	-	-
MSTRG.64079	NHX8	0.05	0.08	0.1	0	0	0	6.91	1.87	4.2	4.3267	0	0.0767	6.26052755	0.001577807	0.015107303	5.818512712	1.60E-23	3.41E-21	PREDICTED: sodium/hydrogen exchanger 8 [Brassica oleracea var. oleracea] [Brassica oleracea]	-	GO:0031224//intrinsic component of membrane	GO:0005451//monovalent cation:proton antiporter activity;GO:0046873//metal ion transmembrane transporter activity	GO:0010351//lithium ion transport;GO:0015992//proton transport;GO:0044763//single-organism cellular process
MSTRG.64080	--	17.74	15.94	18.94	9.82	14.81	14.63	91.03	58.19	69.6	72.94	13.0867	17.54	0.422551076	3.33E-10	1.42E-08	2.056061452	3.16E-23	6.60E-21	-	-	-	-	-
MSTRG.64114	BGLU19	6.99	4.63	5.51	1.06	0.65	0.94	72.27	34.32	50.63	52.4067	0.8833	5.71	2.692460887	7.41E-29	3.46E-26	3.198187698	1.65E-28	5.88E-26	LOW QUALITY PROTEIN: beta-glucosidase 19-like [Brassica rapa]	ko01100//Metabolic pathways;ko01110//Biosynthesis of secondary metabolites;ko00940//Phenylpropanoid biosynthesis;ko00500//Starch and sucrose metabolism;ko00460//Cyanoamino acid metabolism	GO:0005911//cell-cell junction;GO:0009526//plastid envelope;GO:0042579//microbody;GO:0044432//endoplasmic reticulum part	GO:0005543//phospholipid binding;GO:0008422//beta-glucosidase activity;GO:0016791//phosphatase activity;GO:0019899//enzyme binding;GO:0046914//transition metal ion binding;GO:0046983//protein dimerization activity	GO:0000003//reproduction;GO:0006091//generation of precursor metabolites and energy;GO:0006470//protein dephosphorylation;GO:0006568//tryptophan metabolic process;GO:0006605//protein targeting;GO:0006714//sesquiterpenoid metabolic process;GO:0006873//cellular ion homeostasis;GO:0006996//organelle organization;GO:0009267//cellular response to starvation;GO:0009409//response to cold;GO:0009608//res…
MSTRG.64118	--	2.22	2.35	2.03	8.49	10.06	5.08	0.42	1.74	0.93	1.03	7.8767	2.2	-1.8400817	0.00171547	0.016203621	-1.094859186	0.083820765	0.257052729	hypothetical protein HID58_064905 [Brassica napus]	-	-	-	-
MSTRG.64292	ABI5	1.32	0.39	1.41	0.56	0.28	0.45	11.76	3.46	10.12	8.4467	0.43	1.04	1.274174963	0.000913264	0.009526282	3.02179859	8.72E-10	3.06E-08	PREDICTED: protein ABSCISIC ACID-INSENSITIVE 5 [Brassica oleracea var. oleracea] [Brassica oleracea]	ko04075//Plant hormone signal transduction	-	GO:0003677//DNA binding	GO:0003006//developmental process involved in reproduction;GO:0006355//regulation of transcription, DNA-templated;GO:0009628//response to abiotic stimulus;GO:0009755//hormone-mediated signaling pathway;GO:0048580//regulation of post-embryonic development;GO:0048731//system development;GO:0071229//cellular response to acid chemical;GO:0071396//cellular response to lipid;GO:1901701//cellular respon…
MSTRG.64362	OFP5	0.04	0.35	0.43	1.08	1.57	1.38	0.08	0.04	0	0.04	1.3433	0.2733	-2.297084024	0.005693681	0.043490902	-2.772589504	0.072165611	0.230973761	transcription repressor OFP5-like [Brassica rapa]	-	-	-	-
MSTRG.64383	--	0.8	1.54	2.4	3.99	5.73	6.38	0	0.07	0	0.0233	5.3667	1.58	-1.764101724	0.001583548	0.015153403	-6.081388327	3.05E-06	5.01E-05	BnaC09g43340D [Brassica napus]	-	-	-	-
MSTRG.64441	--	0.23	0.57	0.47	1.15	1.84	2.51	0.02	0.05	0.05	0.04	1.8333	0.4233	-2.114603122	4.73E-05	0.000712234	-3.403722186	5.31E-06	8.21E-05	BnaC07g15840D [Brassica napus]	-	-	-	-
MSTRG.64444	--	0.77	1.89	1.65	2.49	3.54	6.01	0.14	0.21	0.19	0.18	4.0133	1.4367	-1.482075618	0.025921588	0.142595567	-2.996656557	1.49E-06	2.65E-05	BnaC07g15840D [Brassica napus]	-	-	-	-
MSTRG.64446	--	1.2	1.88	3.31	2.34	5.44	5.88	0.12	0.29	0.54	0.3167	4.5533	2.13	-1.096069647	0.195135386	0.561017663	-2.749816513	5.05E-06	7.85E-05	hypothetical protein IGI04_030636 [Brassica rapa subsp. trilocularis] [Brassica rapa]	-	-	-	-
MSTRG.64447	--	1.1	1.24	2.16	1.25	3.11	3.54	0.12	0.09	0.27	0.16	2.6333	1.5	-0.811927652	0.54734681	0.905585642	-3.22881869	1.58E-12	8.59E-11	hypothetical protein IGI04_042490 [Brassica rapa subsp. trilocularis] [Brassica rapa]	-	-	-	-
MSTRG.64469	--	0.31	0.36	0.14	1.45	2.32	1.96	0	0	0.02	0.0067	1.91	0.27	-2.822541326	7.02E-07	1.61E-05	-5.339850003	0.001530969	0.011044398	Harbinger transposase-derived protein [Arabidopsis thaliana x Arabidopsis arenosa]	-	-	-	-
MSTRG.64503	--	3.41	6.37	6.98	7.1	14.52	17.63	0.43	0.83	0.32	0.5267	13.0833	5.5867	-1.227670505	0.040040659	0.197479228	-3.407025686	1.73E-13	1.07E-11	BnaC07g15840D [Brassica napus]	-	-	-	-
MSTRG.64512	--	0.92	1.16	1.43	1.24	3.21	2.21	0.18	0.5	0.34	0.34	2.22	1.17	-0.924051147	0.423542167	0.825575874	-1.782901878	0.001957551	0.01356852	PREDICTED: replication protein A 70 kDa DNA-binding subunit B-like [Raphanus sativus]	ko03420//Nucleotide excision repair;ko03440//Homologous recombination;ko03030//DNA replication;ko03430//Mismatch repair	-	-	-
MSTRG.64526	--	2.5	2.18	1.67	2.03	0.91	1.13	5.27	4.73	4.91	4.97	1.3567	2.1167	0.641727797	0.002044942	0.018759283	1.231451761	6.58E-07	1.28E-05	At1g17830 [Arabidopsis thaliana]	-	GO:0043231//intracellular membrane-bounded organelle	-	-
MSTRG.64674	--	0.81	2.46	1.17	8.01	14.54	10.47	0	0	0	0	11.0067	1.48	-2.894708539	1.78E-07	4.59E-06	-10.53138146	7.62E-05	0.000858997	transmembrane protein [Arabidopsis thaliana]	-	-	-	-
MSTRG.64730	--	0.36	0.44	0.87	1.6	2.45	2.44	0.13	0.29	0.24	0.22	2.1633	0.5567	-1.958370376	0.000530931	0.006012808	-1.339310173	0.075207559	0.237936645	BnaC06g03170D [Brassica napus]	-	-	-	-
MSTRG.64797	--	0.52	0.51	1.14	1.89	0.74	0.52	0.09	0.05	0.21	0.1167	1.05	0.7233	-0.537656786	0.989718648	0.995870455	-2.632268215	0.00083979	0.006666313	Harbinger transposase-derived protein [Arabidopsis suecica]	-	-	-	-
MSTRG.64837	ECI1	0.49	0.6	0.94	0	1.37	0	3.66	2.47	2.04	2.7233	0.4567	0.6767	0.567303834	0.409262153	0.813277738	2.008856351	0.001115556	0.008478376	enoyl-CoA delta isomerase 1, peroxisomal-like [Brassica napus]	ko00071//Fatty acid degradation	GO:0042579//microbody	GO:0016856//racemase and epimerase activity, acting on hydroxy acids and derivatives;GO:0016863//intramolecular oxidoreductase activity, transposing C=C bonds	GO:0006812//cation transport;GO:0009062//fatty acid catabolic process;GO:0009628//response to abiotic stimulus
MSTRG.64838	--	1.53	2.93	2.07	1.05	6.25	4.4	0	0.54	0	0.18	3.9	2.1767	-0.841353633	0.717250836	0.954998406	-3.596051679	0.000737922	0.005972777	PREDICTED: L-type lectin-domain containing receptor kinase I.7-like [Brassica oleracea var. oleracea] [Brassica oleracea]	-	-	-	-
MSTRG.64839	--	0	0	0	2.58	0.71	1.11	2.25	0	2.38	1.5433	1.4667	0	-10.51832531	3.57E-06	6.99E-05	10.59183398	0.061157806	0.204957303	PREDICTED: L-type lectin-domain containing receptor kinase I.7-like [Brassica oleracea var. oleracea] [Brassica oleracea]	-	-	-	-
MSTRG.64948	--	0	0.13	0	0.44	1.62	0.48	0	0	0	0	0.8467	0.0433	-4.288244969	0.003620279	0.030113301	-5.437405312	0.568493585	0.844502847	protein ALP1-like isoform X1 [Brassica rapa]	-	-	-	-
MSTRG.65112	TTM2	1.11	1.24	0.76	0.87	0.68	0.75	2.09	2.49	1.94	2.1733	0.7667	1.0367	0.435280719	0.012853472	0.08308366	1.067957384	0.001424802	0.010419166	Phosphoribulokinase / Uridine kinase family [Arabidopsis thaliana]	ko01100//Metabolic pathways;ko00240//Pyrimidine metabolism	-	GO:0016772//transferase activity, transferring phosphorus-containing groups	GO:0009220//pyrimidine ribonucleotide biosynthetic process;GO:0046132//pyrimidine ribonucleoside biosynthetic process
MSTRG.65128	--	8.13	11.54	13.2	8.35	26.31	25.74	1.88	2.75	0.92	1.85	20.1333	10.9567	-0.877777093	0.493314168	0.877786738	-2.56621178	2.18E-07	4.74E-06	hypothetical protein F2Q70_00026013 [Brassica cretica]	-	-	-	-
MSTRG.65129	--	24.57	28.61	35.11	37.57	63.75	68.98	2.65	4.52	4.63	3.9333	56.7667	29.43	-0.947756487	0.096900415	0.364744813	-2.903463183	2.98E-23	6.24E-21	hypothetical protein F2Q69_00050623 [Brassica cretica]	-	-	-	-
MSTRG.65157	--	0.15	0.79	0.31	0.06	0	0.17	1.81	0.69	1.4	1.3	0.0767	0.4167	2.442222329	0.142156764	0.466200365	1.641546029	0.002781693	0.018105157	EamA domain [Arabidopsis thaliana x Arabidopsis arenosa]	-	-	-	GO:0009628//response to abiotic stimulus;GO:0009814//defense response, incompatible interaction
MSTRG.65223	At5g27750	0.7	0.81	0.73	1.22	2.34	2.07	0.05	0.27	0.24	0.1867	1.8767	0.7467	-1.32963619	0.024079755	0.134868381	-2	0.002312774	0.015578771	PREDICTED: FBD-associated F-box protein At5g27750-like [Brassica oleracea var. oleracea] [Brassica oleracea]	-	-	-	GO:0000338//protein deneddylation;GO:0006355//regulation of transcription, DNA-templated;GO:0007126//meiotic nuclear division;GO:0009639//response to red or far red light;GO:0016570//histone modification;GO:0032446//protein modification by small protein conjugation;GO:0042221//response to chemical;GO:0048518//positive regulation of biological process;GO:1903046//meiotic cell cycle process
MSTRG.65322	--	0.23	0.31	0.13	0.39	0.95	1.13	0	0.03	0.03	0.02	0.8233	0.2233	-1.882278041	0.018282732	0.1095759	-3.48112669	0.003522668	0.021976592	ethylene responsive element binding factor -related [Brassica oleracea]	-	-	-	-
MSTRG.65408	--	3.18	2.78	1.35	0.51	0.87	0.53	66.96	27.57	27.14	40.5567	0.6367	2.4367	1.936298768	5.61E-12	3.11E-10	4.056958272	1.64E-22	3.16E-20	PREDICTED: uncharacterized mitochondrial protein AtMg00810-like [Brassica oleracea var. oleracea] [Brassica oleracea]	-	-	-	-
MSTRG.65444	CAND2	0.42	1.27	0.38	1.21	1.97	1.3	0.07	0.07	0.06	0.0667	1.4933	0.69	-1.113867965	0.449789654	0.847377866	-3.371558863	0.008875165	0.046547055	protein CANDIDATE G-PROTEIN COUPLED RECEPTOR 2 [Cannabis sativa]	-	-	-	-
MSTRG.65468	GLN1-5	0.78	0.92	0.46	0.36	0.42	0.28	2.1	4.42	2.83	3.1167	0.3533	0.72	1.026967048	5.25E-08	1.51E-06	2.113935053	1.22E-09	4.19E-08	Terpene synthase N-terminal domain [Arabidopsis suecica]	-	-	GO:0016787//hydrolase activity	-
MSTRG.65488	PBL1	1.86	1.77	2.41	1.73	2.32	2.81	0.56	1.13	0.62	0.77	2.2867	2.0133	-0.183660027	0.135383904	0.453288238	-1.386655698	0.002049516	0.014081321	BnaC05g51610D [Brassica napus]	-	-	-	-
MSTRG.65559	--	1.12	2.02	2.27	2.58	4.02	3.35	0.37	0.4	0.22	0.33	3.3167	1.8033	-0.879067932	0.221204041	0.601124442	-2.450128164	4.91E-10	1.80E-08	BnaC07g15840D [Brassica napus]	-	-	-	-
MSTRG.65562	--	2.31	3.28	1.59	3.24	6.87	4.58	0.18	1.52	0.54	0.7467	4.8967	2.3933	-1.032778647	0.256016441	0.6507227	-1.680485112	0.002417329	0.016171487	non-LTR retroelement reverse transcriptase-like protein [Arabidopsis thaliana]	-	-	-	-
MSTRG.65594	--	7.3	8.4	5.98	5.55	5.4	4.18	24.91	17.95	18.3	20.3867	5.0433	7.2267	0.518952769	3.66E-05	0.000568668	1.49622365	3.02E-09	9.67E-08	BnaC02g41460D [Brassica napus]	-	-	-	-
MSTRG.65624	--	1.88	2.33	3.34	2.8	1.41	2.63	6.49	3.61	6.77	5.6233	2.28	2.5167	0.142480319	0.134847162	0.452269714	1.159911424	0.001647428	0.01175161	hypothetical protein F2Q68_00026437 [Brassica cretica]	-	-	-	-
MSTRG.65626	--	2.89	2.7	2.92	0.61	0.02	0.18	9.78	10.24	10.21	10.0767	0.27	2.8367	3.393165319	3.35E-20	6.07E-18	1.828749942	2.17E-14	1.55E-12	hypothetical protein F2Q70_00022476 [Brassica cretica]	-	-	-	-
MSTRG.65629	--	3.7	6.49	5.24	11.09	16.68	14.32	0.47	1.12	0.47	0.6867	14.03	5.1433	-1.447739448	0.000311579	0.00378754	-2.905021819	7.49E-09	2.23E-07	BnaC09g43340D [Brassica napus]	-	-	-	-
MSTRG.65634	--	0.24	0.36	0.27	0.24	0.31	0.35	2.85	0.34	1.58	1.59	0.3	0.29	-0.0489096	0.48584712	0.871993407	2.45490196	0.001301374	0.009654046	calcium sensing receptor, chloroplastic-like [Brassica napus]	-	GO:0009507//chloroplast;GO:0009579//thylakoid	-	GO:0006629//lipid metabolic process;GO:0006807//nitrogen compound metabolic process;GO:0009416//response to light stimulus;GO:0015979//photosynthesis;GO:0019752//carboxylic acid metabolic process;GO:0044249//cellular biosynthetic process;GO:0044711//single-organism biosynthetic process;GO:0050789//regulation of biological process;GO:1901576//organic substance biosynthetic process
MSTRG.65719	OTU11	0.94	0.8	1	0.98	1.21	1.32	2.77	1.72	2.77	2.42	1.17	0.9133	-0.357295137	0.419854603	0.822406181	1.405793655	1.44E-06	2.57E-05	PREDICTED: LOW QUALITY PROTEIN: OTU domain-containing protein DDB_G0284757 [Brassica oleracea var. oleracea] [Brassica oleracea]	-	GO:0009536//plastid;GO:0016020//membrane	GO:0070011//peptidase activity, acting on L-amino acid peptides	GO:0019538//protein metabolic process
MSTRG.6572	--	0.97	1.67	1.12	1.7	2.94	2.11	0.4	0.67	0.39	0.4867	2.25	1.2533	-0.84415484	0.47984711	0.866698295	-1.364764293	0.009398963	0.048784916	mRNA turnover protein 4 homolog isoform X1 [Brassica napus]	-	GO:0005840//ribosome	-	GO:0009451//RNA modification
MSTRG.65787	GSTT3	0.71	0.49	0.51	0.8	1.12	2.74	0.06	0.15	0	0.07	1.5533	0.57	-1.44633363	0.111180735	0.399030208	-3.025535092	0.001409048	0.010318273	glutathione S-transferase T3-like [Brassica napus]	-	-	-	-
MSTRG.65810	TY3B-G	6.53	5.82	7.4	9.97	7.99	7.39	2.11	4.46	1.61	2.7267	8.45	6.5833	-0.360133094	0.543248037	0.90255727	-1.271679905	0.005646548	0.032313211	Integrase catalytic core [Arabidopsis suecica]	-	-	-	-
MSTRG.65817	--	1.5	4.9	4.95	33.84	32.71	23.72	0.08	0.11	0.03	0.0733	30.09	3.7833	-2.99155431	1.75E-06	3.67E-05	-5.689044964	5.37E-13	3.13E-11	protein ALP1-like isoform X1 [Brassica rapa]	-	-	-	-
MSTRG.65902	dVPE	14.25	24.91	27.54	14.68	47.44	26.02	4.12	12.9	7.24	8.0867	29.38	22.2333	-0.402110135	0.490350964	0.875425096	-1.459107211	0.001504105	0.010878388	vacuolar-processing enzyme delta-isozyme isoform X1 [Brassica napus]	-	GO:0005618//cell wall;GO:0005773//vacuole;GO:0009536//plastid;GO:0044421//extracellular region part	GO:0004175//endopeptidase activity	GO:0003006//developmental process involved in reproduction;GO:0006950//response to stress;GO:0008219//cell death;GO:0009685//gibberellin metabolic process;GO:0010260//organ senescence;GO:0010476//gibberellin mediated signaling pathway;GO:0016192//vesicle-mediated transport;GO:0016485//protein processing;GO:0061024//membrane organization
MSTRG.65928	PDE338	1.84	1.47	1.81	2.77	3.99	3.65	0.22	0.89	0.63	0.58	3.47	1.7067	-1.023754353	0.110483761	0.39754919	-1.557056504	0.004348984	0.026072473	BnaC05g21630D [Brassica napus]	ko03010//Ribosome	-	-	-
MSTRG.65952	--	0	0	0	0	0	0	1.3	0.07	0.13	0.5	0	0	0	1	1	8.965784285	0.006211643	0.034848562	BnaCnng16360D [Brassica napus]	-	-	-	-
MSTRG.66012	UGT85A5	0.28	1.62	1.22	1.06	2.8	2.48	0.15	0.07	0.19	0.1367	2.1133	1.04	-1.022936811	0.453255493	0.850744347	-2.927850214	0.000630922	0.00522708	BnaC05g50470D [Brassica napus]	ko01100//Metabolic pathways;ko01110//Biosynthesis of secondary metabolites	-	-	-
MSTRG.66013	--	0.06	0.51	1.33	0.81	1.05	1.54	0.06	0	0	0.02	1.1333	0.6333	-0.839535328	0.728611792	0.958884095	-4.984893108	0.004914098	0.028848073	hypothetical protein N665_12207s0001, partial [Sinapis alba]	-	-	-	-
MSTRG.66016	GSTT3	1.09	1.88	1.32	2.49	3.66	3.39	0.11	0.26	0.19	0.1867	3.18	1.43	-1.153011619	0.013326014	0.085476561	-2.937478915	5.50E-13	3.20E-11	Harbinger transposase-derived protein [Arabidopsis suecica]	-	-	-	-
MSTRG.66036	--	0.5	2.49	1.9	3.78	9.99	6.69	0.09	0.04	0.05	0.06	6.82	1.63	-2.064899775	0.031955937	0.166917216	-4.763765654	2.21E-11	1.00E-09	hypothetical protein IGI04_015347 [Brassica rapa subsp. trilocularis] [Brassica rapa]	-	-	-	-
MSTRG.66125	--	0.18	0.16	0.25	0.06	0.09	0.17	0.02	0.06	0.05	0.0433	0.1067	0.1967	0.882643049	0.011793553	0.077680281	-2.182203331	0.003030702	0.019439674	BnaCnng29830D [Brassica napus]	-	-	-	-
MSTRG.66130	--	0.83	0.66	1.65	1.1	2.53	2.87	0.07	0.05	0.03	0.05	2.1667	1.0467	-1.049675159	0.319684717	0.728503043	-4.387730153	5.40E-07	1.07E-05	01P13-2 [Brassica rapa subsp. pekinensis] [Brassica rapa]	-	-	-	-
MSTRG.66132	--	0.67	0.81	1.35	1.19	2.93	2.58	0	0.13	0.05	0.06	2.2333	0.9433	-1.243359043	0.177456779	0.531260381	-3.974733241	0.000265223	0.002505455	BnaC07g15840D [Brassica napus]	-	-	-	-
MSTRG.66134	--	0.12	0.5	0.32	1.83	2.83	2.41	0	0	0	0	2.3567	0.3133	-2.910977553	5.05E-05	0.000755514	-8.291554446	0.006021727	0.033982944	BnaC06g03220D [Brassica napus]	-	-	-	-
MSTRG.66202	accB	5.83	7.81	8.6	11.96	16.39	15.62	3.13	3.53	4.09	3.5833	14.6567	7.4133	-0.983362744	0.011540981	0.076305284	-1.048820128	7.55E-06	0.000112614	PREDICTED: biotin carboxyl carrier protein of acetyl-CoA carboxylase [Brassica oleracea var. oleracea] [Brassica oleracea]	-	GO:0009536//plastid	-	GO:0006873//cellular ion homeostasis;GO:0030001//metal ion transport
MSTRG.66230	SBT1.7	1.64	2.05	2.15	4.08	6.03	4.83	0.22	0.08	0.1	0.1333	4.98	1.9467	-1.355139874	6.60E-05	0.0009603	-3.867896464	4.06E-17	4.15E-15	PREDICTED: subtilisin-like protease SBT1.7 [Brassica oleracea var. oleracea] [Brassica oleracea]	-	GO:0005576//extracellular region;GO:0005618//cell wall	GO:0004175//endopeptidase activity;GO:0005515//protein binding	GO:0003006//developmental process involved in reproduction;GO:0009892//negative regulation of metabolic process;GO:0010191//mucilage metabolic process;GO:0019538//protein metabolic process;GO:0044702//single organism reproductive process
MSTRG.66247	TSJT1	18.87	13.26	37.5	9.47	14.99	29.88	11.04	3.22	11.47	8.5767	18.1133	23.21	0.357694458	0.101847289	0.376929377	-1.436257566	0.00462377	0.02742607	PREDICTED: stem-specific protein TSJT1 [Brassica oleracea var. oleracea] [Brassica oleracea]	-	GO:0005911//cell-cell junction;GO:0009536//plastid;GO:0016020//membrane	GO:0005488//binding	GO:0006950//response to stress;GO:0009746//response to hexose;GO:0009863//salicylic acid mediated signaling pathway;GO:0034285//response to disaccharide;GO:0042743//hydrogen peroxide metabolic process
MSTRG.6632	--	5.97	3.4	4.83	1.11	0.44	1.02	14.99	10.08	13.34	12.8033	0.8567	4.7333	2.466050665	2.96E-11	1.49E-09	1.435591034	6.37E-07	1.25E-05	LOW QUALITY PROTEIN: pentatricopeptide repeat-containing protein At3g14330 [Arabidopsis lyrata subsp. lyrata] [Arabidopsis lyrata]	-	-	-	-
MSTRG.66342	argS	1.39	0.42	0.88	0.02	0	0	6.74	8.47	12.22	9.1433	0.0067	0.8967	7.071462363	1.59E-09	6.07E-08	3.350076544	6.57E-19	8.56E-17	arginine--tRNA ligase, cytoplasmic-like isoform X1 [Zingiber officinale]	ko00970//Aminoacyl-tRNA biosynthesis	-	-	-
MSTRG.66353	--	4.25	5.31	5.33	11.08	20.94	17.07	0	0.29	0.33	0.2067	16.3633	4.9633	-1.721085413	1.91E-06	3.97E-05	-4.585931728	1.31E-13	8.30E-12	BnaC09g43340D [Brassica napus]	-	-	-	-
MSTRG.66499	--	2.27	2.4	2.72	3.13	3.99	3.85	9.85	5.49	7.31	7.55	3.6567	2.4633	-0.569917256	0.843958334	0.978338534	1.615864781	9.80E-11	4.02E-09	Beta-1,3-glucosyltransferase [Gossypium australe]	-	-	GO:0016740//transferase activity	-
MSTRG.6650	--	0.71	0.43	0.72	2.69	4.95	4.22	0.42	0.23	0.29	0.3133	3.9533	0.62	-2.672729483	2.71E-05	0.000433498	-0.984569959	0.306768127	0.609137466	hypothetical protein IGI04_006119 [Brassica rapa subsp. trilocularis] [Brassica rapa]	-	-	-	-
MSTRG.66616	AVT1C	1.26	1.68	1.23	2.63	3.84	2.13	0.18	0.31	0.15	0.2133	2.8667	1.39	-1.044289276	0.14794039	0.477326021	-2.703903573	7.88E-08	1.88E-06	BnaA04g22360D, partial [Brassica napus]	-	-	-	-
MSTRG.66754	HSP90-6	0.31	0.34	0.38	0.67	0.74	0.55	1.94	0.56	0.83	1.11	0.6533	0.3433	-0.928209317	0.420171938	0.822812339	1.69287784	0.00086058	0.006798378	BnaC05g44190D [Brassica napus]	ko04626//Plant-pathogen interaction;ko04141//Protein processing in endoplasmic reticulum	GO:0009532//plastid stroma;GO:0030312//external encapsulating structure	GO:0005515//protein binding	GO:0044267//cellular protein metabolic process;GO:0050896//response to stimulus
MSTRG.66797	GLUA2	4.3	5.85	7.22	6.39	7.45	13.43	2.01	2.68	2.84	2.51	9.09	5.79	-0.650716946	0.770603455	0.973447085	-1.205875984	0.000104989	0.001131693	RmlC-like cupins superfamily protein [Arabidopsis thaliana]	-	GO:0005911//cell-cell junction;GO:0043231//intracellular membrane-bounded organelle;GO:0044444//cytoplasmic part	GO:0046914//transition metal ion binding	-
MSTRG.66825	--	0	0	0	0	0	0	3.27	2.63	4.02	3.3067	0	0	0	1	1	11.6911619	5.65E-15	4.32E-13	hypothetical protein HID58_013684 [Brassica napus]	-	-	-	-
MSTRG.66826	SAE1A	10.42	2.99	12.94	0.1	0.03	0.03	256.96	253.27	324.05	278.0933	0.0533	8.7833	7.363587247	3.37E-19	5.26E-17	4.984656793	7.24E-39	6.09E-36	BnaAnng25940D, partial [Brassica napus]	ko04120//Ubiquitin mediated proteolysis	-	-	-
MSTRG.66827	--	0.31	0.09	0.41	0	0	0	18.75	13.62	20.72	17.6967	0	0.27	8.076815597	7.86E-07	1.78E-05	6.034374423	4.09E-73	2.16E-69	BnaC02g23500D [Brassica napus]	ko03420//Nucleotide excision repair;ko03440//Homologous recombination;ko03030//DNA replication;ko03430//Mismatch repair	-	-	-
MSTRG.66849	--	42.26	57.36	83.06	42.47	66.62	50.94	8.99	11.62	19.15	13.2533	53.3433	60.8933	0.19097631	5.55E-05	0.000823752	-2.199929033	1.17E-12	6.54E-11	Defensin-like (DEFL) family protein [Arabidopsis thaliana]	-	-	-	-
MSTRG.67083	--	1.18	1.33	1.65	1.99	4.56	3.11	0.16	0.26	0.43	0.2833	3.22	1.3867	-1.215439661	0.075827441	0.310930496	-2.291048782	4.15E-05	0.000508155	ORF-c [Brassica rapa]	-	-	-	-
MSTRG.67089	At5g60610	0.32	0.33	0.69	0.13	0.16	0.14	0.29	0.43	0.46	0.3933	0.1433	0.4467	1.639824436	0.00398201	0.032565108	-0.183446141	0.948536339	0.983752529	BnaAnng21920D [Brassica napus]	-	-	-	-
MSTRG.67169	--	3.59	3.54	3.8	4.58	2.86	4.85	1.45	2.46	1.53	1.8133	4.0967	3.6433	-0.169191515	0.134660689	0.451976164	-1.006614844	0.003235946	0.0205098	GDSL esterase/lipase At2g03980-like [Brassica napus]	-	-	-	-
MSTRG.67389	YUC10	3.44	3.51	4.03	2.86	6.82	7.67	0.32	0.92	0.97	0.7367	5.7833	3.66	-0.660057608	0.897387962	0.994882214	-2.31275978	6.38E-09	1.92E-07	probable indole-3-pyruvate monooxygenase YUCCA10 [Brassica rapa]	ko01100//Metabolic pathways;ko00380//Tryptophan metabolism	-	GO:0000166//nucleotide binding;GO:0016709//oxidoreductase activity, acting on paired donors, with incorporation or reduction of molecular oxygen, NAD(P)H as one donor, and incorporation of one atom of oxygen	GO:0009653//anatomical structure morphogenesis;GO:0009850//auxin metabolic process;GO:0042743//hydrogen peroxide metabolic process;GO:0044710//single-organism metabolic process
MSTRG.67391	YUC10	0.17	0.64	0.62	0	0	0	0	0	0	0	0	0.4767	8.896836931	0.000741001	0.007986295	-8.896836931	0.010693079	0.05406838	probable indole-3-pyruvate monooxygenase YUCCA10 [Brassica rapa]	ko01100//Metabolic pathways;ko00380//Tryptophan metabolism	-	GO:0000166//nucleotide binding;GO:0016709//oxidoreductase activity, acting on paired donors, with incorporation or reduction of molecular oxygen, NAD(P)H as one donor, and incorporation of one atom of oxygen	GO:0009653//anatomical structure morphogenesis;GO:0009850//auxin metabolic process;GO:0042743//hydrogen peroxide metabolic process;GO:0044710//single-organism metabolic process
MSTRG.67414	CYCA3-4	2.1	2.99	3.1	5.16	7.52	6.76	2.8	2.02	1.95	2.2567	6.48	2.73	-1.247092862	8.06E-06	0.000145744	-0.274707618	0.528656414	0.81819667	PREDICTED: cyclin-A3-4-like isoform X1 [Brassica oleracea var. oleracea] [Brassica oleracea]	ko03010//Ribosome	-	-	-
MSTRG.67468	LOL1	1.04	0.65	0.37	3.25	3.82	2.23	0	0.09	0.17	0.0867	3.1	0.6867	-2.174586379	0.000285287	0.003508052	-2.986060809	0.001297204	0.00962943	PREDICTED: protein LOL1 [Brassica oleracea var. oleracea] [Brassica oleracea]	-	GO:0043231//intracellular membrane-bounded organelle	GO:0003676//nucleic acid binding	GO:0010363//regulation of plant-type hypersensitive response;GO:0019430//removal of superoxide radicals;GO:0030154//cell differentiation
MSTRG.6748	RPS13B	2.36	3.14	2.24	4.95	8.31	5.07	0.36	0.94	0.85	0.7167	6.11	2.58	-1.243801314	0.017647655	0.106700548	-1.847996907	4.38E-05	0.000532154	ribosomal protein S13A [Prunus dulcis]	ko03010//Ribosome	-	-	-
MSTRG.67543	--	0.26	0.64	0.63	1.48	2.61	2.27	0.11	0.07	0.02	0.0667	2.12	0.51	-2.055495113	5.72E-05	0.000846055	-2.935459748	0.000289376	0.002698166	BnaC07g15840D [Brassica napus]	-	-	-	-
MSTRG.67609	RE2	0.71	0.36	1.07	1.38	2.19	1.63	0.15	0.18	0.1	0.1433	1.7333	0.7133	-1.280900827	0.118221085	0.414995406	-2.315202232	0.003667624	0.022714285	PREDICTED: uncharacterized mitochondrial protein AtMg00810-like [Brassica oleracea var. oleracea] [Brassica oleracea]	-	-	-	-
MSTRG.67629	--	2.86	0.58	4.64	5	4.84	8.51	0.34	0.55	0.79	0.56	6.1167	2.6933	-1.183352865	0.264704638	0.662634407	-2.26589406	0.005661766	0.032372184	expressed protein [Arabidopsis lyrata subsp. lyrata] [Arabidopsis lyrata]	-	-	-	-
MSTRG.6764	--	10.87	12.66	17.31	21.58	34.07	30.09	1.12	4.02	2.85	2.6633	28.58	13.6133	-1.069985551	0.002054536	0.018836734	-2.353715458	2.91E-09	9.34E-08	Reverse transcriptase domain [Arabidopsis suecica]	-	-	-	-
MSTRG.6766	--	18.44	20.46	25.74	34.53	50.41	55.4	0.57	3.26	1.45	1.76	46.78	21.5467	-1.118427164	0.000478221	0.005484162	-3.613817363	2.42E-14	1.69E-12	hypothetical protein F2Q69_00001709 [Brassica cretica]	-	-	-	-
MSTRG.67761	--	2.5	2.44	2.66	4.13	6.4	6.33	0.07	1.03	0.63	0.5767	5.62	2.5333	-1.149533213	0.063542123	0.274783944	-2.135227381	3.31E-05	0.000416598	BnaC09g43340D [Brassica napus]	-	-	-	-
MSTRG.67768	--	1.51	0.25	1.38	0.23	0.11	0.2	0.29	0.81	0.12	0.4067	0.18	1.0467	2.539733247	0.00576823	0.043934067	-1.363883411	0.28577537	0.584113838	cadmium tolerance 1 [Arabidopsis thaliana]	-	-	-	-
MSTRG.6777	ASK4	1.3	0.38	0.88	0.2	0.08	0.17	10.93	5.05	6.19	7.39	0.15	0.8533	2.508146904	8.73E-06	0.000156728	3.114393055	4.10E-12	2.08E-10	PREDICTED: SCF ubiquitin ligase complex protein SKP1a-like isoform X1 [Brassica oleracea var. oleracea] [Brassica oleracea]	ko04141//Protein processing in endoplasmic reticulum;ko04120//Ubiquitin mediated proteolysis	GO:0015630//microtubule cytoskeleton;GO:0016020//membrane;GO:0031461//cullin-RING ubiquitin ligase complex;GO:0043231//intracellular membrane-bounded organelle;GO:0044444//cytoplasmic part	GO:0005488//binding;GO:0016772//transferase activity, transferring phosphorus-containing groups	GO:0000018//regulation of DNA recombination;GO:0000160//phosphorelay signal transduction system;GO:0001558//regulation of cell growth;GO:0003006//developmental process involved in reproduction;GO:0006511//ubiquitin-dependent protein catabolic process;GO:0006796//phosphate-containing compound metabolic process;GO:0007017//microtubule-based process;GO:0007126//meiotic nuclear division;GO:0009755//h…
MSTRG.67904	At4g02000	0.65	1.01	0.67	1.41	1.73	1.71	0.16	0.4	0.35	0.3033	1.6167	0.7767	-1.057654792	0.119894508	0.418900367	-1.356391504	0.007655817	0.041292958	Zinc knuckle CX2CX4HX4C [Arabidopsis thaliana x Arabidopsis arenosa]	-	-	-	-
MSTRG.67942	--	0.17	0.3	0.92	0.8	0.76	1.18	0	0	0.09	0.03	0.9133	0.4633	-0.97909101	0.53933519	0.900377722	-3.949016071	0.005014515	0.029334671	Reverse transcriptase RNA-dependent DNA polymerase [Arabidopsis suecica]	-	-	-	-
MSTRG.67943	RE2	0.44	0.83	1.26	1.22	1.94	2.08	0	0.16	0.1	0.0867	1.7467	0.8433	-1.050429427	0.221224896	0.601141197	-3.282553857	6.23E-05	0.00072216	01P13-1 [Brassica rapa subsp. pekinensis] [Brassica rapa]	-	-	-	-
MSTRG.67953	--	0.94	3.24	1.83	1.45	2.93	2.58	0.16	0.07	0.2	0.1433	2.32	2.0033	-0.211722315	0.164452853	0.508285676	-3.804956426	0.000761296	0.006125606	hypothetical protein IGI04_042921 [Brassica rapa subsp. trilocularis] [Brassica rapa]	-	-	-	-
MSTRG.67955	--	4.07	3.07	5.26	3.84	6.56	7.09	0.21	0.34	0.41	0.32	5.83	4.1333	-0.496190169	0.764855637	0.970423387	-3.691161905	1.98E-11	9.04E-10	BnaC07g15840D [Brassica napus]	-	-	-	-
MSTRG.67968	--	1.82	2.59	1.66	4.42	6.36	5.05	0.33	0.66	0.5	0.4967	5.2767	2.0233	-1.382892834	0.015533026	0.096611905	-2.026384186	0.000486301	0.004202628	unnamed protein product [Brassica napus]	-	-	-	-
MSTRG.67995	OBGL	2.26	2.08	2.42	2.01	2.41	2.7	0.48	1.15	0.91	0.8467	2.3733	2.2533	-0.074853995	0.033474182	0.172668299	-1.41219475	0.000760751	0.00612247	GTP-binding protein OBGC, chloroplastic [Eutrema salsugineum]	-	-	-	GO:0009987//cellular process
MSTRG.68106	At2g39360	1.03	1.32	1.61	2.34	3.33	3.51	0.2	0.46	0.44	0.3667	3.06	1.32	-1.212993723	0.021932512	0.125750499	-1.847996907	0.000147915	0.001516287	BnaAnng27910D [Brassica napus]	-	GO:0031224//intrinsic component of membrane	GO:0004713//protein tyrosine kinase activity;GO:0032550//purine ribonucleoside binding	GO:0001101//response to acid chemical;GO:0001558//regulation of cell growth;GO:0006468//protein phosphorylation;GO:0015698//inorganic anion transport
MSTRG.68120	At4g29033	8.3	14.87	13.7	11.69	18.67	12.97	1.76	2.02	3.18	2.32	14.4433	12.29	-0.23291882	0.151743354	0.484338565	-2.405288205	1.49E-09	5.05E-08	BnaC06g42020D [Brassica napus]	-	-	-	-
MSTRG.68127	--	1.95	2.24	2.2	1.4	2.84	2.25	0.46	1.03	0.93	0.8067	2.1633	2.13	-0.022402547	0.088465212	0.34430481	-1.400808884	0.004288464	0.025766297	P-loop containing nucleoside triphosphate hydrolase [Arabidopsis thaliana x Arabidopsis arenosa]	-	-	-	-
MSTRG.68214	BUBR1	1.88	2.72	2.31	3.59	5.87	5.64	0.27	0.52	0.29	0.36	5.0333	2.3033	-1.127790934	0.034188002	0.175349786	-2.677654398	1.80E-09	6.03E-08	BnaC06g43250D [Brassica napus]	-	GO:0005876//spindle microtubule;GO:0098687//chromosomal region	GO:0005488//binding	GO:0007017//microtubule-based process;GO:0048449//floral organ formation;GO:0051052//regulation of DNA metabolic process;GO:0071173//spindle assembly checkpoint;GO:1902410//mitotic cytokinetic process
MSTRG.68224	BUBR1	1.14	1.24	1.95	3.18	3.05	2.73	0.42	0.43	0.4	0.4167	2.9867	1.4433	-1.049131707	0.428998356	0.829477898	-1.79243893	0.000655691	0.005403419	BnaC06g43250D [Brassica napus]	-	GO:0005876//spindle microtubule;GO:0098687//chromosomal region	GO:0005488//binding	GO:0007017//microtubule-based process;GO:0048449//floral organ formation;GO:0051052//regulation of DNA metabolic process;GO:0071173//spindle assembly checkpoint;GO:1902410//mitotic cytokinetic process
MSTRG.68302	NOB1	0.52	0.38	0.48	1.21	2.59	1.99	0.55	0.87	0.47	0.63	1.93	0.46	-2.068895081	0.004805648	0.03788145	0.453717967	0.388408562	0.69712391	20S-pre-rRNA D-site endonuclease nob1-like [Brassica rapa]	ko03008//Ribosome biogenesis in eukaryotes	-	-	-
MSTRG.68347	--	0.39	0.1	0.16	0.38	0.74	0.43	0.43	1.1	1.09	0.8733	0.5167	0.2167	-1.253756592	0.343914126	0.753002743	2.011055189	0.001467525	0.010668457	BnaC06g13970D [Brassica napus]	-	-	-	-
MSTRG.68439	At5g05200	0.56	0.41	0.8	0.9	1.49	0.91	1.3	1.12	1.39	1.27	1.1	0.59	-0.898716664	0.472996235	0.863581532	1.106041637	0.001986027	0.013726198	uncharacterized aarF domain-containing protein kinase At5g05200, chloroplastic [Brassica napus]	-	GO:0044434//chloroplast part	-	GO:0044260//cellular macromolecule metabolic process;GO:0044262//cellular carbohydrate metabolic process;GO:0044723//single-organism carbohydrate metabolic process;GO:0044763//single-organism cellular process
MSTRG.68446	IDD5	1.77	1.77	2.31	3.16	3.95	3.02	0.26	0.6	0.86	0.5733	3.3767	1.95	-0.792125644	0.334859602	0.744288052	-1.76602806	4.50E-06	7.07E-05	protein indeterminate-domain 5, chloroplastic isoform X2 [Brassica napus]	-	GO:0009536//plastid	GO:0001071//nucleic acid binding transcription factor activity;GO:0003676//nucleic acid binding;GO:0043169//cation binding	GO:0006351//transcription, DNA-templated;GO:0010468//regulation of gene expression;GO:0080090//regulation of primary metabolic process;GO:2000112//regulation of cellular macromolecule biosynthetic process
MSTRG.68450	ARP4	1.03	0.95	0.74	1.86	2.45	1.76	0.13	0.25	0.25	0.21	2.0233	0.9067	-1.158089865	0.107976397	0.391904044	-2.110182918	0.000516655	0.004418833	actin-related protein 4-like [Brassica napus]	-	GO:0033202//DNA helicase complex;GO:0043189//H4/H2A histone acetyltransferase complex;GO:0043232//intracellular non-membrane-bounded organelle	GO:0005198//structural molecule activity	GO:0000377//RNA splicing, via transesterification reactions with bulged adenosine as nucleophile;GO:0000904//cell morphogenesis involved in differentiation;GO:0003006//developmental process involved in reproduction;GO:0006305//DNA alkylation;GO:0006310//DNA recombination;GO:0006342//chromatin silencing;GO:0009409//response to cold;GO:0009639//response to red or far red light;GO:0009756//carbohydr…
MSTRG.68511	--	1.9	1.97	2.24	0.38	0.2	0.64	1.02	0.85	1.92	1.2633	0.4067	2.0367	2.324291232	5.32E-07	1.25E-05	-0.688974532	0.222710966	0.498331933	hypothetical protein F2Q68_00036234 [Brassica cretica]	-	-	-	-
MSTRG.68535	--	5.91	3.32	5.07	2.39	1.96	1.78	18.59	14.41	13.67	15.5567	2.0433	4.7667	1.222056168	5.92E-08	1.69E-06	1.70648032	6.98E-10	2.49E-08	-	-	-	-	-
MSTRG.68542	PIP2-5	4.11	4.56	4.59	2.85	3.29	2.64	11.8	10.2	9.76	10.5867	2.9267	4.42	0.594787931	4.77E-09	1.67E-07	1.260130137	2.83E-11	1.26E-09	PREDICTED: probable aquaporin PIP2-5 [Brassica oleracea var. oleracea] [Brassica oleracea]	-	GO:0031224//intrinsic component of membrane	GO:0005488//binding	GO:0000041//transition metal ion transport;GO:0009267//cellular response to starvation;GO:0042044//fluid transport
MSTRG.68555	SMZ	0.65	0.17	0.2	0.03	0	0.08	3.74	2.22	2.48	2.8133	0.0367	0.34	3.212993723	0.001464046	0.014156233	3.048673847	2.28E-08	6.05E-07	PREDICTED: AP2-like ethylene-responsive transcription factor SMZ [Brassica oleracea var. oleracea] [Brassica oleracea]	-	GO:0043231//intracellular membrane-bounded organelle	GO:0001071//nucleic acid binding transcription factor activity;GO:0003676//nucleic acid binding	GO:0000160//phosphorelay signal transduction system;GO:0003006//developmental process involved in reproduction;GO:0009653//anatomical structure morphogenesis;GO:0009657//plastid organization;GO:0010468//regulation of gene expression;GO:0034645//cellular macromolecule biosynthetic process;GO:0042221//response to chemical;GO:0044707//single-multicellular organism process
MSTRG.68641	--	0.32	0.37	0.47	0.16	0.28	0.54	1.44	1.22	0.79	1.15	0.3267	0.3867	0.243271151	0.248958343	0.641394338	1.572471557	0.001960949	0.013588505	BnaC01g27690D [Brassica napus]	ko03420//Nucleotide excision repair;ko03440//Homologous recombination;ko03030//DNA replication;ko03430//Mismatch repair	-	-	-
MSTRG.68874	--	1.42	1.54	2.15	1.19	1.38	1.61	0.19	0.12	0.29	0.2	1.3933	1.7033	0.289820349	9.60E-05	0.001343823	-3.090288885	1.51E-14	1.10E-12	BnaC07g15850D [Brassica napus]	-	-	-	-
MSTRG.68879	--	0.12	0.41	0.32	0.21	0.53	0.3	0	0	0	0	0.3467	0.2833	-0.291048782	0.666948396	0.938712291	-8.14635653	0.003033067	0.019453098	hypothetical protein IGI04_042601 [Brassica rapa subsp. trilocularis] [Brassica rapa]	-	-	-	-
MSTRG.68880	--	1.93	2.35	3.51	2.78	4.85	5.3	0.5	0.15	0.17	0.2733	4.31	2.5967	-0.731027042	0.586805325	0.926068376	-3.247927513	1.09E-11	5.20E-10	GAG-pre-integrase domain, partial [Arabidopsis suecica]	-	-	-	-
MSTRG.68882	--	0.64	0.98	1.13	0.9	1.64	1.76	0.07	0	0.05	0.04	1.4333	0.9167	-0.644905041	0.928373177	0.994882214	-4.518325308	4.40E-08	1.10E-06	BnaC07g15840D [Brassica napus]	-	-	-	-
MSTRG.68884	--	0.95	1.29	1.76	1.18	1.44	2.11	0.52	0.05	0.49	0.3533	1.5767	1.3333	-0.241840184	0.338898573	0.748205993	-1.915935735	0.004260883	0.025631944	BnaC07g15840D [Brassica napus]	-	-	-	-
MSTRG.68981	LRR-RLK	1.41	1.6	1.24	1.43	1.36	1.57	0.49	0.81	0.58	0.6267	1.4533	1.4167	-0.036865294	0.015416828	0.09602783	-1.176730179	0.001638054	0.01169424	LOW QUALITY PROTEIN: probable leucine-rich repeat receptor-like serine/threonine-protein kinase At3g14840 [Jatropha curcas]	-	-	GO:0004672//protein kinase activity;GO:0032550//purine ribonucleoside binding	GO:0006464//cellular protein modification process;GO:0016310//phosphorylation
MSTRG.68992	--	45.3	46.82	56.11	84.88	120.02	94.77	23.13	32.3	26.08	27.17	99.89	49.41	-1.015537201	0.000118476	0.00162126	-0.86278849	4.24E-05	0.000516854	unnamed protein product [Brassica napus]	-	-	-	-
MSTRG.69022	CP29B	2.87	1.85	3.35	2.9	4.28	4	12.9	15.56	20.85	16.4367	3.7267	2.69	-0.47027961	0.572215534	0.920727367	2.611239674	3.69E-28	1.26E-25	BnaUnng05280D, partial [Brassica napus]	ko03420//Nucleotide excision repair;ko03440//Homologous recombination;ko03030//DNA replication;ko03430//Mismatch repair	-	-	-
MSTRG.69024	--	0.76	0.94	0.67	0.83	0.53	0.49	38.95	49.99	65.7	51.5467	0.6167	0.79	0.357361788	0.107925137	0.391770113	6.027882673	4.90E-121	1.94E-116	replication protein A 70 kDa DNA-binding subunit B-like isoform X2 [Brassica rapa]	ko03420//Nucleotide excision repair;ko03440//Homologous recombination;ko03030//DNA replication;ko03430//Mismatch repair	-	-	-
MSTRG.69026	CP29B	0.72	1.34	0.24	0.83	0.73	1.07	53.73	63.15	103.39	73.4233	0.8767	0.7667	-0.193428938	0.428480166	0.828776594	6.581495347	2.78E-22	5.17E-20	BnaUnng05280D, partial [Brassica napus]	ko03420//Nucleotide excision repair;ko03440//Homologous recombination;ko03030//DNA replication;ko03430//Mismatch repair	-	-	-
MSTRG.69088	WAK3	0	0	0	0	0.02	0	0.83	0.3	0.58	0.57	0.0067	0	-2.736965594	0.983134282	0.994882214	9.154818109	1.59E-07	3.55E-06	BnaC02g23840D [Brassica napus]	-	-	-	-
MSTRG.69238	--	0.14	0.03	0	0	0	0	0.47	0.43	0.82	0.5733	0	0.0567	5.824428435	0.134101256	0.45072728	3.338801913	0.000552331	0.004679397	-	-	-	-	-
MSTRG.69293	--	0.96	1.32	1.35	2.73	5.18	4.3	0.44	0.45	0.59	0.4933	4.07	1.21	-1.750021747	3.14E-07	7.70E-06	-1.294372372	5.41E-05	0.000639507	BnaC04g26220D [Brassica napus]	-	-	-	-
MSTRG.69461	nmd3	7.02	7.44	7.63	10.09	10.36	10.91	18.99	10.49	15.13	14.87	10.4533	7.3633	-0.505532141	0.498497526	0.879687467	1.013973729	4.10E-06	6.53E-05	60S ribosomal export protein NMD3-like [Brassica napus]	ko03013//Nucleocytoplasmic transport;ko03008//Ribosome biogenesis in eukaryotes	GO:0043231//intracellular membrane-bounded organelle;GO:0044444//cytoplasmic part	-	GO:0006886//intracellular protein transport;GO:0006996//organelle organization;GO:0009832//plant-type cell wall biogenesis
MSTRG.69558	--	22.55	12.25	37.84	5.63	17.16	18.53	68.92	47.67	93.9	70.1633	13.7733	24.2133	0.813923948	0.016305221	0.100377366	1.534915587	3.49E-06	5.65E-05	BnaC03g44790D [Brassica napus]	-	-	-	-
MSTRG.6960	NUDT21	0.21	0.43	0.47	0.81	1.18	0.98	4.62	1.53	1.91	2.6867	0.99	0.37	-1.419903254	0.179542997	0.534903761	2.860220162	2.14E-06	3.67E-05	nudix hydrolase 21, chloroplastic [Brassica rapa]	-	GO:0009536//plastid	GO:0052841//inositol bisdiphosphate tetrakisphosphate diphosphatase activity;GO:0052842//inositol diphosphate pentakisphosphate diphosphatase activity	-
MSTRG.69611	--	14.49	8.6	19.77	4.3	10.58	11.55	30.74	28.03	45.62	34.7967	8.81	14.2867	0.697455425	8.82E-05	0.001243873	1.284279761	2.24E-06	3.82E-05	BnaC03g44790D [Brassica napus]	-	-	-	-
MSTRG.69613	--	2.16	1.04	3.61	0.91	2.25	2.32	6.48	5.01	8.5	6.6633	1.8267	2.27	0.313478905	0.09532569	0.361288558	1.553551769	0.00021896	0.002125818	hypothetical protein HID58_072690 [Brassica napus]	-	-	-	-
MSTRG.69704	--	2.15	2.55	1.77	2.83	3.73	3.46	0.46	0.84	1.24	0.8467	3.34	2.1567	-0.631044891	0.892267967	0.994882214	-1.348937215	0.00157444	0.011309513	BnaA10g09250D [Brassica napus]	-	-	-	-
MSTRG.69738	--	0.65	0.59	0.47	0.15	0.46	0.39	3.45	3.2	5.37	4.0067	0.3333	0.57	0.773996325	0.009145949	0.06364759	2.813368666	1.47E-18	1.80E-16	Transposon En/Spm-like [Arabidopsis thaliana x Arabidopsis arenosa]	-	-	-	-
MSTRG.69739	--	0.67	0.15	0.39	0.29	0.36	0.28	3.69	3.22	4.57	3.8267	0.31	0.4033	0.379704426	0.147186428	0.475890992	3.246043689	1.63E-13	1.01E-11	Zinc finger CCHC-type [Arabidopsis suecica]	-	-	-	-
MSTRG.6982	--	0.34	0.57	1	2.04	3.35	2.75	0.07	0.54	0.43	0.3467	2.7133	0.6367	-2.091456156	0.00337665	0.028503022	-0.87698911	0.422000321	0.731621735	unnamed protein product [Brassica rapa]	-	-	-	-
MSTRG.69887	TUBA2	21.64	22.48	29.42	34.76	45.94	43.25	3.04	8.57	6.88	6.1633	41.3167	24.5133	-0.75315719	0.166421672	0.512065719	-1.991783952	6.48E-09	1.95E-07	tubulin alpha chain-like [Tripterygium wilfordii]	ko04145//Phagosome	GO:0005911//cell-cell junction;GO:0009532//plastid stroma;GO:0015630//microtubule cytoskeleton;GO:0030312//external encapsulating structure;GO:0031090//organelle membrane;GO:0043234//protein complex	GO:0005198//structural molecule activity;GO:0017111//nucleoside-triphosphatase activity;GO:0032550//purine ribonucleoside binding	GO:0006006//glucose metabolic process;GO:0006637//acyl-CoA metabolic process;GO:0006970//response to osmotic stress;GO:0006996//organelle organization;GO:0007017//microtubule-based process;GO:0009629//response to gravity;GO:0010038//response to metal ion;GO:0016192//vesicle-mediated transport;GO:0032989//cellular component morphogenesis;GO:0040007//growth;GO:0043623//cellular protein complex asse…
MSTRG.70007	--	4.38	2.69	3.67	0.66	0.14	0.13	9.42	8.12	6.82	8.12	0.31	3.58	3.529619467	1.10E-13	7.73E-12	1.18152014	1.16E-05	0.000165225	BnaA09g29430D [Brassica napus]	-	-	-	-
MSTRG.70024	ABCG25	4	5.85	6.39	11.06	13.51	13.82	4.64	2.49	3	3.3767	12.7967	5.4133	-1.241178928	0.000208308	0.002671034	-0.680917458	0.075445531	0.238441526	PREDICTED: ABC transporter G family member 25 [Brassica oleracea var. oleracea] [Brassica oleracea]	-	GO:0031224//intrinsic component of membrane	GO:0015098//molybdate ion transmembrane transporter activity;GO:0032550//purine ribonucleoside binding;GO:0042626//ATPase activity, coupled to transmembrane movement of substances	GO:0001101//response to acid chemical;GO:0015698//inorganic anion transport;GO:0015718//monocarboxylic acid transport
MSTRG.70025	ABCG25	6.19	6.94	6.58	13.26	15.39	17.55	5.1	2.56	3.3	3.6533	15.4	6.57	-1.228965075	0.000438426	0.005092013	-0.846679978	0.023394482	0.099478434	PREDICTED: ABC transporter G family member 25 [Brassica oleracea var. oleracea] [Brassica oleracea]	-	GO:0031224//intrinsic component of membrane	GO:0005488//binding;GO:0015405//P-P-bond-hydrolysis-driven transmembrane transporter activity;GO:0017111//nucleoside-triphosphatase activity	GO:0001101//response to acid chemical;GO:0010051//xylem and phloem pattern formation;GO:0015718//monocarboxylic acid transport
MSTRG.70159	SCPL6	3.73	3.22	3.27	0.87	1.11	1.62	3.07	6.11	6.41	5.1967	1.2	3.4067	1.505326385	8.34E-16	8.08E-14	0.609225732	0.019102606	0.085118473	serine carboxypeptidase-like 2 [Eutrema salsugineum]	-	GO:0005618//cell wall	GO:0004180//carboxypeptidase activity;GO:0016753//O-sinapoyltransferase activity	GO:0000097//sulfur amino acid biosynthetic process;GO:0006090//pyruvate metabolic process;GO:0006544//glycine metabolic process;GO:0006633//fatty acid biosynthetic process;GO:0006732//coenzyme metabolic process;GO:0006753//nucleoside phosphate metabolic process;GO:0009683//indoleacetic acid metabolic process;GO:0009694//jasmonic acid metabolic process;GO:0019538//protein metabolic process
MSTRG.70303	--	0.45	0.44	0.88	1.24	3.08	2.73	0.22	0.31	0.53	0.3533	2.35	0.59	-1.993873897	0.00183759	0.017159088	-0.739685096	0.31410658	0.618117523	Histone deacetylase complex subunit SAP30 Sin3 binding domain [Arabidopsis suecica]	-	GO:0043231//intracellular membrane-bounded organelle	-	-
MSTRG.70440	--	1.52	2.6	1.95	3.1	6.69	6.42	0.16	0.45	0.34	0.3167	5.4033	2.0233	-1.417115669	0.040173087	0.197989188	-2.675697098	0.000147011	0.00150878	hypothetical protein HID58_047152 [Brassica napus]	-	-	-	-
MSTRG.70520	--	2.38	3.55	4.6	4.02	5.96	4.71	1.48	1.63	0.69	1.2667	4.8967	3.51	-0.48032896	0.681106104	0.944627003	-1.470434113	0.00892165	0.046761651	BnaA07g04320D [Brassica napus]	-	-	-	-
MSTRG.70567	--	0.37	0.3	0.38	1.48	1.92	1.18	0	0	0.08	0.0267	1.5267	0.35	-2.12495827	0.003639743	0.03024349	-3.714245518	0.016880364	0.077257946	BnaC06g12640D [Brassica napus]	-	-	-	-
MSTRG.70721	UGE4	6.61	6.58	7.6	12.74	22.11	23.98	0.25	0.98	0.88	0.7033	19.61	6.93	-1.500662278	1.12E-06	2.44E-05	-3.300574854	8.69E-18	9.62E-16	BnaCnng11940D [Brassica napus]	ko01100//Metabolic pathways;ko04145//Phagosome;ko04070//Phosphatidylinositol signaling system;ko00562//Inositol phosphate metabolism	GO:0005794//Golgi apparatus	GO:0005515//protein binding;GO:0016857//racemase and epimerase activity, acting on carbohydrates and derivatives	GO:0009250//glucan biosynthetic process;GO:0010015//root morphogenesis;GO:0010396//rhamnogalacturonan II metabolic process;GO:0042546//cell wall biogenesis;GO:0045229//external encapsulating structure organization
MSTRG.70722	UGE4	0.44	0.5	0.48	1.19	1.9	1.66	0	0	0	0	1.5833	0.4733	-1.742036584	0.001744866	0.016435761	-8.886712714	1.95E-06	3.38E-05	BnaCnng11940D [Brassica napus]	ko01100//Metabolic pathways;ko04145//Phagosome;ko04070//Phosphatidylinositol signaling system;ko00562//Inositol phosphate metabolism	-	-	-
MSTRG.70749	--	0.69	0.82	0.44	1.09	1.52	0.95	0	0.07	0.06	0.0433	1.1867	0.65	-0.868403117	0.679611984	0.943923474	-3.906890596	0.005366384	0.031031014	DNA-3-methyladenine glycosylase-like [Brassica napus]	ko03410//Base excision repair	-	-	-
MSTRG.70790	--	8.61	6.59	10.64	4.19	4.63	5.07	36.66	18.9	29.22	28.26	4.63	8.6133	0.895559471	2.42E-15	2.23E-13	1.714117896	2.63E-11	1.18E-09	unnamed protein product [Brassica napus]	-	-	-	-
MSTRG.70822	--	0.43	0.4	0.27	0.39	0.29	0.1	3.2	2.27	2.53	2.6667	0.26	0.3667	0.495957495	0.134981057	0.452449877	2.862496476	2.06E-12	1.10E-10	LOW QUALITY PROTEIN: BEL1-like homeodomain protein 2 [Brassica napus]	-	-	-	-
MSTRG.70855	--	0.94	0.74	1.23	0.41	0.6	0.39	4.93	3.99	3.12	4.0133	0.4667	0.97	1.055592326	0.001238041	0.012318106	2.048744334	1.34E-08	3.74E-07	hypothetical protein DY000_02020704 [Brassica cretica]	-	-	-	-
MSTRG.70918	SH3P3	0.41	0.47	0.17	0.74	1.39	0.62	0	0.06	0	0.02	0.9167	0.35	-1.389042291	0.200156447	0.568752028	-4.129283017	0.004624326	0.02742607	BnaC01g27750D [Brassica napus]	ko00910//Nitrogen metabolism	GO:0009536//plastid	GO:0016836//hydro-lyase activity;GO:0046914//transition metal ion binding	GO:0044699//single-organism process
MSTRG.71010	LPAT2	1.09	0.96	0.83	1.09	1.29	1.48	0.11	0.43	0.3	0.28	1.2867	0.96	-0.422532036	0.569936197	0.919410628	-1.777607579	0.002277136	0.015385893	PREDICTED: 1-acyl-sn-glycerol-3-phosphate acyltransferase 2-like [Raphanus sativus]	ko01100//Metabolic pathways;ko01110//Biosynthesis of secondary metabolites;ko00564//Glycerophospholipid metabolism;ko00561//Glycerolipid metabolism	GO:0031090//organelle membrane;GO:0031224//intrinsic component of membrane;GO:0043231//intracellular membrane-bounded organelle	GO:0016411//acylglycerol O-acyltransferase activity	GO:0044707//single-multicellular organism process;GO:0046341//CDP-diacylglycerol metabolic process;GO:0046471//phosphatidylglycerol metabolic process
MSTRG.71037	--	0	0.09	0	1.23	4.01	4.44	0	0	0	0	3.2267	0.03	-6.748938236	1.50E-05	0.000255344	-4.906890596	0.844666575	0.931138542	unnamed protein product [Brassica napus]	-	-	-	-
MSTRG.71151	--	4.64	4.94	5.35	10.63	16.19	12.05	5.47	3.87	5.91	5.0833	12.9567	4.9767	-1.380442942	1.04E-05	0.000183678	0.030595077	0.578410106	0.852680788	unnamed protein product [Brassica napus]	-	-	-	-
MSTRG.71179	--	2.89	3.97	4.04	9.1	13.14	9.59	0.35	0.81	0.54	0.5667	10.61	3.6333	-1.546059022	3.08E-05	0.000487812	-2.680721484	1.09E-08	3.12E-07	hypothetical protein F2Q70_00008886 [Brassica cretica]	-	-	-	-
MSTRG.71191	--	1.13	0.75	1.18	0.1	0.52	1.01	0.1	0	0.09	0.0633	0.5433	1.02	0.908659688	0.036563273	0.184465323	-4.009460329	0.000706836	0.005760527	BnaCnng29830D [Brassica napus]	-	-	-	-
MSTRG.71198	--	0.6	0.47	1.76	0.78	2.61	2.68	0.1	0.1	0.03	0.0767	2.0233	0.9433	-1.100894463	0.390610054	0.798149307	-3.621096287	0.000124259	0.001305774	hypothetical protein IGI04_042731 [Brassica rapa subsp. trilocularis] [Brassica rapa]	-	-	-	-
MSTRG.7120	PDIL1-1	5.6	8.07	9.59	9.17	16.8	14.75	1.37	1.98	2.65	2	13.5733	7.7533	-0.807886465	0.345491861	0.754680585	-1.954816691	2.90E-10	1.11E-08	protein disulfide isomerase-like 1-2 [Brassica napus]	ko04141//Protein processing in endoplasmic reticulum	-	-	-
MSTRG.71207	At1g13609	2.27	3.65	3.58	10.45	12.47	8.33	0.47	0.48	0.86	0.6033	10.4167	3.1667	-1.717856771	0.000185338	0.002410103	-2.391937816	2.21E-05	0.000290923	defensin-like protein 287 [Brassica rapa]	-	GO:0043231//intracellular membrane-bounded organelle	-	GO:0051704//multi-organism process
MSTRG.71222	--	14.35	14.12	17.36	9.22	9.02	11.5	31.54	34.73	36.61	34.2933	9.9133	15.2767	0.623887638	7.84E-10	3.14E-08	1.166598357	2.87E-14	2.00E-12	metallothionein-like protein [Brassica napus]	-	-	GO:0046914//transition metal ion binding	GO:0001101//response to acid chemical;GO:0010038//response to metal ion;GO:0015698//inorganic anion transport
MSTRG.71247	--	0	0	0	0	0	0	2.25	0.46	0.74	1.15	0	0	0	1	1	10.16741815	0.000312189	0.002879644	BnaC04g25190D [Brassica napus]	-	-	-	-
MSTRG.71346	HDG12	2.24	2.27	1.74	5.21	7.88	6.82	0.28	0.53	0.25	0.3533	6.6367	2.0833	-1.671565126	2.18E-07	5.51E-06	-2.559791925	2.94E-09	9.43E-08	BnaCnng65280D [Brassica napus]	-	GO:0043231//intracellular membrane-bounded organelle	GO:0001071//nucleic acid binding transcription factor activity;GO:0004177//aminopeptidase activity;GO:0043169//cation binding;GO:0044212//transcription regulatory region DNA binding	GO:0000904//cell morphogenesis involved in differentiation;GO:0006498//N-terminal protein lipidation;GO:0006508//proteolysis;GO:0009409//response to cold;GO:0009814//defense response, incompatible interaction;GO:0009827//plant-type cell wall modification;GO:0010467//gene expression
MSTRG.71354	MBF1C	0.96	0.98	1.14	1.59	3.21	1.75	5.38	1.78	3.32	3.4933	2.1833	1.0267	-1.088564556	0.2100799	0.583744678	1.766636461	3.01E-05	0.000381743	multiprotein bridging factor 1c [Brassica rapa subsp. chinensis] [Brassica rapa]	-	GO:0043231//intracellular membrane-bounded organelle;GO:0043232//intracellular non-membrane-bounded organelle	GO:0001071//nucleic acid binding transcription factor activity;GO:0003677//DNA binding;GO:0003712//transcription cofactor activity	GO:0000160//phosphorelay signal transduction system;GO:0000302//response to reactive oxygen species;GO:0001101//response to acid chemical;GO:0006355//regulation of transcription, DNA-templated;GO:0009642//response to light intensity;GO:0009725//response to hormone;GO:0033554//cellular response to stress;GO:0044267//cellular protein metabolic process
MSTRG.71545	At2g03933	6.5	11.11	9.51	8.98	16.08	11.88	2.53	1.02	2.89	2.1467	12.3133	9.04	-0.445826688	0.530430006	0.8958641	-2.074224585	4.33E-06	6.85E-05	PREDICTED: defensin-like protein 71 [Raphanus sativus]	-	-	-	-
MSTRG.71681	RFK1	0.8	0.64	0.94	1.28	1.26	1.79	0.02	0.21	0.19	0.14	1.4433	0.7933	-0.863405451	0.372855671	0.781518778	-2.502500341	3.57E-06	5.77E-05	probable LRR receptor-like serine/threonine-protein kinase At1g29720 [Brassica napus]	-	-	-	-
MSTRG.71711	--	0.1	0.43	0.27	1.18	1.94	1.38	0	0.1	0.02	0.04	1.5	0.2667	-2.491853096	0.000120753	0.001650763	-2.736965594	0.029710767	0.119804997	BnaCnng57140D [Brassica napus]	-	GO:0043231//intracellular membrane-bounded organelle	-	-
MSTRG.71727	--	2.85	4.23	5.59	7.61	4.38	4.75	0.25	1.64	0.58	0.8233	5.58	4.2233	-0.401883003	0.637155007	0.932788184	-2.358833578	9.39E-05	0.00102721	Harbinger transposase-derived protein [Arabidopsis suecica]	-	-	-	-
MSTRG.71780	--	0.45	0.14	0.14	0.12	0.12	0	3.07	2.35	2.96	2.7933	0.08	0.2433	1.604862058	0.088160762	0.343686577	3.520981875	1.74E-10	6.84E-09	probable E3 ubiquitin-protein ligase XERICO [Capsella rubella]	-	-	GO:0046914//transition metal ion binding	-
MSTRG.71844	--	0.13	0.05	0.05	0.07	0	0	0.54	0.9	0.94	0.7933	0.0233	0.0767	1.716207034	0.175746408	0.528217689	3.371255807	1.49E-06	2.66E-05	apoptosis inhibitory protein [Arabidopsis thaliana]	-	-	-	-
MSTRG.71863	SCPL49	0.56	0.4	0.58	0.36	0.3	0.54	0	0	0	0	0.4	0.5133	0.359895945	0.056630557	0.253735403	-9.003752135	6.47E-07	1.26E-05	PREDICTED: serine carboxypeptidase-like 49 [Brassica oleracea var. oleracea] [Brassica oleracea]	-	GO:0043231//intracellular membrane-bounded organelle;GO:0044444//cytoplasmic part	GO:0004180//carboxypeptidase activity	GO:0019538//protein metabolic process
MSTRG.72133	DDM1	0.23	0.49	0.45	1.81	2.83	1.41	0.09	0.02	0.05	0.0533	2.0167	0.39	-2.370426613	3.19E-06	6.32E-05	-2.87036472	0.000487239	0.004209098	PREDICTED: ATP-dependent DNA helicase DDM1 [Brassica oleracea var. oleracea] [Brassica oleracea]	-	GO:0000785//chromatin;GO:0043231//intracellular membrane-bounded organelle	GO:0003676//nucleic acid binding;GO:0003678//DNA helicase activity;GO:0032550//purine ribonucleoside binding	GO:0006342//chromatin silencing;GO:0009292//genetic transfer;GO:0031062//positive regulation of histone methylation;GO:0032196//transposition;GO:0032392//DNA geometric change;GO:0034968//histone lysine methylation;GO:0035067//negative regulation of histone acetylation;GO:0035194//posttranscriptional gene silencing by RNA;GO:0051052//regulation of DNA metabolic process
MSTRG.72160	BSMT1	0.67	0.59	0.92	0.02	0.2	0.16	1.22	1.41	2.17	1.6	0.1267	0.7267	2.520256811	6.50E-07	1.49E-05	1.138706271	0.001165979	0.008793993	PREDICTED: LOW QUALITY PROTEIN: salicylate/benzoate carboxyl methyltransferase [Brassica oleracea var. oleracea] [Brassica oleracea]	-	-	GO:0008168//methyltransferase activity	GO:0006631//fatty acid metabolic process;GO:0006721//terpenoid metabolic process;GO:0010087//phloem or xylem histogenesis;GO:0044260//cellular macromolecule metabolic process
MSTRG.72182	--	4.65	4.54	5.06	9.54	12.11	10.34	0.85	2.41	1.74	1.6667	10.6633	4.75	-1.166659073	0.001506514	0.01451126	-1.510961919	0.000258971	0.002456373	BnaC07g16920D [Brassica napus]	-	GO:0043231//intracellular membrane-bounded organelle	-	GO:0006787//porphyrin-containing compound catabolic process
MSTRG.7221	RPL4D	0.56	0.51	0.37	0.98	1.48	0.86	0	0	0.05	0.0167	1.1067	0.48	-1.20511443	0.339042544	0.7483662	-4.847996907	0.00385441	0.023645187	60S ribosomal protein L4-like [Ziziphus jujuba]	ko03010//Ribosome	-	-	-
MSTRG.7222	--	3.2	7.23	7.16	15.01	19.22	15.61	0.5	0.87	0.86	0.7433	16.6133	5.8633	-1.502548586	0.000161826	0.002136265	-2.979639868	9.17E-13	5.17E-11	transcription factor VIP1-like [Brassica napus]	-	-	-	-
MSTRG.72310	--	0.32	0.11	0.03	0	0.02	0	9.65	6.65	9.26	8.52	0.0067	0.1533	4.523561956	0.000791819	0.008450539	5.796110165	7.17E-38	5.45E-35	defensin-like protein 210 [Arabidopsis lyrata subsp. lyrata] [Arabidopsis lyrata]	-	-	-	-
MSTRG.72312	--	0.39	0.31	0.28	0	0	0	24.36	16.68	23.52	21.52	0	0.3267	8.351675438	2.11E-08	6.56E-07	6.041715019	3.05E-102	6.04E-98	hypothetical protein DY000_02013129 [Brassica cretica]	-	-	-	-
MSTRG.72362	LHCA3	1.64	2.68	2.64	3.2	2.47	2.54	0.13	0.68	0.47	0.4267	2.7367	2.32	-0.238294916	0.273948426	0.674353601	-2.442943496	2.34E-05	0.000306295	PREDICTED: chlorophyll a-b binding protein 8, chloroplastic [Brassica oleracea var. oleracea] [Brassica oleracea]	ko00196//Photosynthesis - antenna proteins	GO:0009521//photosystem;GO:0031224//intrinsic component of membrane;GO:0031976//plastid thylakoid;GO:0044434//chloroplast part	GO:0043169//cation binding;GO:0046906//tetrapyrrole binding	GO:0000097//sulfur amino acid biosynthetic process;GO:0006091//generation of precursor metabolites and energy;GO:0006464//cellular protein modification process;GO:0009725//response to hormone
MSTRG.72388	At2g03290	0.09	0.19	0.16	0.59	1.03	1.34	0	0	0	0	0.9867	0.1467	-2.750021747	0.000601848	0.00667917	-7.196397213	0.010806622	0.054551818	PREDICTED: transmembrane emp24 domain-containing protein p24delta8-like [Raphanus sativus]	-	GO:0012505//endomembrane system;GO:0016020//membrane;GO:0043231//intracellular membrane-bounded organelle;GO:0044444//cytoplasmic part	-	GO:0015031//protein transport
MSTRG.72443	RPS6	4.63	4.7	4.75	6.85	6.89	6.81	1.58	2.36	2.33	2.09	6.85	4.6933	-0.54549106	0.688984842	0.948315845	-1.167109986	9.48E-08	2.23E-06	PREDICTED: glutathione S-transferase T3-like [Raphanus sativus]	-	-	GO:0032550//purine ribonucleoside binding	GO:0050794//regulation of cellular process
MSTRG.72534	--	0.51	0.17	0.34	0	0	0	0.75	0.51	0.2	0.4867	0	0.34	8.409390936	0.001005965	0.010326626	0.517399217	0.516248752	0.808838802	BnaCnng29910D [Brassica napus]	-	-	-	-
MSTRG.72623	BGLU23	0	0	0.05	0.18	0	0	3.28	0.82	2.01	2.0367	0.06	0.0167	-1.847996907	0.707983236	0.95472016	6.933100475	4.41E-07	8.92E-06	BnaC05g43610D [Brassica napus]	ko01100//Metabolic pathways;ko01110//Biosynthesis of secondary metabolites;ko00940//Phenylpropanoid biosynthesis;ko00500//Starch and sucrose metabolism;ko00460//Cyanoamino acid metabolism	GO:0005911//cell-cell junction;GO:0009526//plastid envelope;GO:0042579//microbody;GO:0044432//endoplasmic reticulum part	GO:0004721//phosphoprotein phosphatase activity;GO:0005543//phospholipid binding;GO:0008422//beta-glucosidase activity;GO:0019899//enzyme binding;GO:0046914//transition metal ion binding;GO:0046983//protein dimerization activity	GO:0000003//reproduction;GO:0006091//generation of precursor metabolites and energy;GO:0006470//protein dephosphorylation;GO:0006568//tryptophan metabolic process;GO:0006605//protein targeting;GO:0006714//sesquiterpenoid metabolic process;GO:0006873//cellular ion homeostasis;GO:0006996//organelle organization;GO:0009267//cellular response to starvation;GO:0009409//response to cold;GO:0009608//res…
MSTRG.72639	RGA1	3.23	3.67	4.28	6.83	9.46	7.19	2.27	2.76	3.63	2.8867	7.8267	3.7267	-1.07051222	0.003649819	0.030314909	-0.368481258	0.233104494	0.513467445	PREDICTED: DELLA protein RGA1 [Brassica oleracea var. oleracea] [Brassica oleracea]	ko04075//Plant hormone signal transduction	GO:0043231//intracellular membrane-bounded organelle	GO:0000975//regulatory region DNA binding;GO:0000988//transcription factor activity, protein binding;GO:0001071//nucleic acid binding transcription factor activity	GO:0006090//pyruvate metabolic process;GO:0006972//hyperosmotic response;GO:0006996//organelle organization;GO:0008104//protein localization;GO:0009312//oligosaccharide biosynthetic process;GO:0009639//response to red or far red light;GO:0009894//regulation of catabolic process;GO:0009937//regulation of gibberellic acid mediated signaling pathway;GO:0010029//regulation of seed germination;GO:0010…
MSTRG.72721	4CL1	49.96	41.96	51.06	21.24	17.85	23.63	73.42	78.22	73.32	74.9867	20.9067	47.66	1.188815893	3.05E-31	1.81E-28	0.653855142	2.99E-07	6.31E-06	PREDICTED: 4-coumarate--CoA ligase 1 [Brassica oleracea var. oleracea] [Brassica oleracea]	ko01100//Metabolic pathways;ko01110//Biosynthesis of secondary metabolites;ko00940//Phenylpropanoid biosynthesis;ko00360//Phenylalanine metabolism;ko00130//Ubiquinone and other terpenoid-quinone biosynthesis	GO:0043231//intracellular membrane-bounded organelle	GO:0016405//CoA-ligase activity;GO:0016703//oxidoreductase activity, acting on single donors with incorporation of molecular oxygen, incorporation of one atom of oxygen (internal monooxygenases or internal mixed function oxidases);GO:0032550//purine ribonucleoside binding	GO:0006575//cellular modified amino acid metabolic process;GO:0006595//polyamine metabolic process;GO:0006605//protein targeting;GO:0006950//response to stress;GO:0009416//response to light stimulus;GO:0009699//phenylpropanoid biosynthetic process;GO:0009891//positive regulation of biosynthetic process;GO:0043067//regulation of programmed cell death;GO:0051707//response to other organism
MSTRG.72789	--	0	0	0	0	0	0	1.75	0.58	1.15	1.16	0	0	0	1	1	10.17990909	1.07E-14	7.95E-13	BnaC04g19560D [Brassica napus]	-	-	-	-
MSTRG.72805	--	1.43	1.32	1.17	0.22	0.03	0.11	0.2	0.64	0.57	0.47	0.12	1.3067	3.444784843	1.79E-15	1.67E-13	-1.475158492	0.001990468	0.013753291	BnaC06g01180D [Brassica napus]	-	GO:0009526//plastid envelope	-	GO:0006950//response to stress;GO:0048869//cellular developmental process
MSTRG.72864	--	0	0	0	0	0	0	0.74	0.17	0.1	0.3367	0	0	0	1	1	8.395177077	0.005947009	0.033647956	Retrotransposon Copia-like N-terminal [Arabidopsis suecica]	-	-	-	-
MSTRG.72968	XCP2	2.65	2.51	2.32	1.44	0.74	1.45	3.41	2.92	2.57	2.9667	1.21	2.4933	1.043068722	1.80E-06	3.76E-05	0.250767066	0.196080441	0.459302012	cysteine protease XCP2 [Brassica rapa]	-	GO:0005773//vacuole;GO:0009536//plastid;GO:0016020//membrane;GO:0030312//external encapsulating structure	GO:0070011//peptidase activity, acting on L-amino acid peptides	GO:0012501//programmed cell death;GO:0019538//protein metabolic process;GO:0045491//xylan metabolic process;GO:0048509//regulation of meristem development
MSTRG.72974	CYP71B17	0.05	0.1	0.25	0.06	0.1	0.13	4.48	1.41	2.7	2.8633	0.0967	0.1333	0.4639471	0.301766867	0.707531819	4.424586226	1.35E-13	8.54E-12	cytochrome P450 71B17-like isoform X1 [Brassica napus]	-	-	-	-
MSTRG.73154	--	8.23	9.32	11.16	12.51	15.13	14.41	3.11	4.86	4.18	4.05	14.0167	9.57	-0.55055247	0.712659224	0.954998406	-1.240597017	5.06E-07	1.01E-05	BnaA08g04160D [Brassica napus]	-	GO:0009536//plastid;GO:0016020//membrane	-	GO:0048588//developmental cell growth
MSTRG.73195	--	3.12	2.67	3.74	1.96	1.97	2.09	8.21	6.14	6.78	7.0433	2.0067	3.1767	0.662712727	1.04E-05	0.000183736	1.148744648	1.96E-06	3.39E-05	hypothetical protein Bca52824_027829 [Brassica carinata]	-	-	-	-
MSTRG.73196	--	3.12	2.67	3.74	1.96	1.97	2.09	8.21	6.14	6.78	7.0433	2.0067	3.1767	0.662712727	1.04E-05	0.000183736	1.148744648	1.96E-06	3.39E-05	hypothetical protein Bca52824_027829 [Brassica carinata]	-	-	-	-
MSTRG.73218	--	0.52	0.39	0.43	0.17	0.08	0.45	1.39	0.93	1.8	1.3733	0.2333	0.4467	0.936806174	0.081622056	0.32682554	1.620411337	0.002044803	0.014055043	BnaA07g08240D [Brassica napus]	ko03420//Nucleotide excision repair;ko03440//Homologous recombination;ko03030//DNA replication;ko03430//Mismatch repair	-	-	-
MSTRG.73325	GSTT3	0.95	1.36	0.93	2.21	2.94	2.29	0.3	0.52	0.35	0.39	2.48	1.08	-1.199308808	0.030801313	0.162485612	-1.469485283	0.00238411	0.015981703	glutathione S-transferase T3-like [Brassica napus]	-	-	-	-
MSTRG.73505	--	1.35	1.97	1.03	2.28	3.7	2.99	0.22	0.67	0.57	0.4867	2.99	1.45	-1.044092584	0.1842425	0.542766937	-1.575047032	0.005141185	0.029983103	BnaC03g66390D [Brassica napus]	ko03420//Nucleotide excision repair;ko03440//Homologous recombination;ko03030//DNA replication;ko03430//Mismatch repair	-	-	-
MSTRG.73755	GMI1	1.78	2.93	2.25	5.81	5.51	4.41	0.52	0.93	1.05	0.8333	5.2433	2.32	-1.17635946	0.008222079	0.058513561	-1.477159211	0.000589785	0.004939554	LOW QUALITY PROTEIN: structural maintenance of chromosomes flexible hinge domain-containing protein GMI1 [Brassica rapa]	-	-	-	-
MSTRG.73759	GMI1	2.35	2.77	2.07	1.49	1.02	0.99	0.72	3.56	1.76	2.0133	1.1667	2.3967	1.038636849	1.45E-08	4.61E-07	-0.251443221	0.762321724	0.928158637	structural maintenance of chromosomes flexible hinge domain-containing protein GMI1 isoform X1 [Brassica rapa]	-	-	-	-
MSTRG.73770	At1g32763	1.27	2.43	1.49	1.06	1.44	1.05	0.29	0.45	0.16	0.3	1.1833	1.73	0.547915514	0.027448576	0.148864876	-2.527737632	0.001967918	0.013624859	PREDICTED: defensin-like protein 47 [Brassica oleracea var. oleracea] [Brassica oleracea]	-	-	-	-
MSTRG.73771	CLSY4	0.01	0.18	0.11	0.56	0.91	0.54	0	0	0	0	0.67	0.1	-2.744161096	0.000490195	0.005602644	-6.64385619	0.006538643	0.036336199	SNF2 domain-containing protein CLASSY 4 [Brassica rapa]	ko03440//Homologous recombination	GO:0043231//intracellular membrane-bounded organelle	GO:0003676//nucleic acid binding;GO:0017111//nucleoside-triphosphatase activity;GO:0032550//purine ribonucleoside binding	GO:0007154//cell communication;GO:0016571//histone methylation;GO:0030422//production of siRNA involved in RNA interference;GO:0045087//innate immune response;GO:0048580//regulation of post-embryonic development
MSTRG.73794	RWA3	1	0.56	1.01	1.11	1.97	0.96	0.22	0.16	0	0.1267	1.3467	0.8567	-0.652586934	0.94239946	0.994882214	-2.757697036	0.007154479	0.039095298	PREDICTED: zinc finger BED domain-containing protein RICESLEEPER 2-like [Brassica oleracea var. oleracea] [Brassica oleracea]	-	-	-	-
MSTRG.73893	--	0.18	0.64	0.53	1.21	2.1	1.36	0.04	0	0.03	0.0233	1.5567	0.45	-1.790463143	0.019956187	0.117059709	-4.269460675	0.002149418	0.014665776	YTH family protein [Arabidopsis thaliana]	-	-	-	-
MSTRG.73973	--	15.92	17.09	18.19	34.16	36.16	36.05	13.29	12.19	11.94	12.4733	35.4567	17.0667	-1.054875603	5.15E-05	0.000769617	-0.452334252	0.040584066	0.151385342	unnamed protein product [Brassica napus]	-	-	-	-
MSTRG.74025	--	0.22	0.14	0.17	0.23	0.32	0.29	0.96	0.52	0.39	0.6233	0.28	0.1767	-0.664396968	0.936002355	0.994882214	1.818974005	0.005474763	0.031522452	BnaC07g31630D [Brassica napus]	-	GO:0043231//intracellular membrane-bounded organelle	-	-
MSTRG.74029	CEL3	0.1	0.06	0.12	0.16	0.05	0.05	0.52	0.51	0.79	0.6067	0.0867	0.0933	0.106915204	0.601850404	0.932788184	2.700439718	0.000187067	0.00185821	endoglucanase 9 isoform X1 [Brassica rapa]	ko01100//Metabolic pathways;ko00500//Starch and sucrose metabolism	GO:0005618//cell wall;GO:0005911//cell-cell junction;GO:0016020//membrane;GO:0043231//intracellular membrane-bounded organelle;GO:0044444//cytoplasmic part	GO:0004553//hydrolase activity, hydrolyzing O-glycosyl compounds	GO:0003002//regionalization;GO:0005975//carbohydrate metabolic process;GO:0009653//anatomical structure morphogenesis;GO:0048437//floral organ development;GO:0048507//meristem development;GO:0051707//response to other organism
MSTRG.74300	--	1.31	1.33	1.5	4	4.25	4.42	0	0.54	0.19	0.2433	4.2233	1.38	-1.613713852	2.94E-08	8.84E-07	-2.503662399	0.072910646	0.232670956	Harbinger transposase-derived protein [Arabidopsis suecica]	-	-	-	-
MSTRG.74336	--	3.64	3.77	3.85	3.47	3.66	4.46	0.53	1.51	0.93	0.99	3.8633	3.7533	-0.041673739	7.49E-05	0.001077866	-1.922671991	1.12E-07	2.59E-06	Ulp1 protease family protein [Brassica oleracea]	-	-	-	-
MSTRG.74365	CBR1	5.78	5.98	8.49	11.84	16.46	18.52	2.08	3.36	3.07	2.8367	15.6067	6.75	-1.209203026	0.001352945	0.013256687	-1.250690871	3.94E-05	0.000485506	structure-specific endonuclease subunit slx1-like [Brassica napus]	-	GO:0043231//intracellular membrane-bounded organelle	GO:0004519//endonuclease activity	GO:0006259//DNA metabolic process
MSTRG.74372	TPS07	6.64	6.77	6.27	2.04	0.64	0.93	3.41	6.15	4.47	4.6767	1.2033	6.56	2.446659478	1.22E-07	3.24E-06	-0.488215212	0.1276258	0.34397293	terpenoid synthase 26 [Eutrema salsugineum]	-	GO:0005911//cell-cell junction;GO:0009536//plastid	-	GO:0006714//sesquiterpenoid metabolic process;GO:0046246//terpene biosynthetic process
MSTRG.74442	--	1.94	2.97	1.78	7.07	7.21	5.33	0.44	0.86	0.64	0.6467	6.5367	2.23	-1.55151142	0.001216563	0.012128054	-1.785949558	0.000280345	0.002627009	PREDICTED: glutathione S-transferase T3-like [Brassica oleracea var. oleracea] [Brassica oleracea]	-	-	-	-
MSTRG.74473	--	0.84	0.51	0.37	0	0.45	0.38	0.05	0	0	0.0167	0.2767	0.5733	1.051225323	0.097494567	0.366370081	-5.10433666	0.007228047	0.039416855	solute carrier family 40 member 1-like [Brassica napus]	-	-	-	-
MSTRG.74607	GRF8	0.13	0.06	0.1	0.15	0.17	0.19	1.31	0.45	0.55	0.77	0.17	0.0967	-0.814444347	0.810621556	0.97358954	2.993768046	1.16E-05	0.000165665	PREDICTED: growth-regulating factor 8-like isoform X2 [Brassica oleracea var. oleracea] [Brassica oleracea]	-	GO:0005618//cell wall;GO:0009526//plastid envelope;GO:0016020//membrane	GO:0051219//phosphoprotein binding	GO:0009404//toxin metabolic process;GO:0009685//gibberellin metabolic process;GO:0010467//gene expression;GO:0010476//gibberellin mediated signaling pathway;GO:0019222//regulation of metabolic process;GO:0034645//cellular macromolecule biosynthetic process;GO:0043401//steroid hormone mediated signaling pathway;GO:0048827//phyllome development
MSTRG.74761	VTC2	0.67	0.68	0.98	0.79	0.6	0.72	0.15	0.27	0.33	0.25	0.7033	0.7767	0.143086956	0.031071101	0.163571451	-1.635367454	0.000517975	0.004428178	LOW QUALITY PROTEIN: GDP-L-galactose phosphorylase 1 [Brassica rapa]	ko01100//Metabolic pathways;ko01110//Biosynthesis of secondary metabolites;ko00053//Ascorbate and aldarate metabolism	GO:0043231//intracellular membrane-bounded organelle	GO:0004645//phosphorylase activity;GO:0008905//mannose-phosphate guanylyltransferase activity;GO:0035251//UDP-glucosyltransferase activity	GO:0000302//response to reactive oxygen species;GO:0001101//response to acid chemical;GO:0006605//protein targeting;GO:0006972//hyperosmotic response;GO:0009617//response to bacterium;GO:0009694//jasmonic acid metabolic process;GO:0009755//hormone-mediated signaling pathway;GO:0019852//L-ascorbic acid metabolic process;GO:0043067//regulation of programmed cell death
MSTRG.74765	Mge2	1.79	1.8	1.67	3.09	2.15	3.52	7.44	1.93	3.95	4.44	2.92	1.7533	-0.73586807	0.679369231	0.94376248	1.340459378	0.002898795	0.018740866	PREDICTED: protein GrpE-like isoform X1 [Brassica oleracea var. oleracea] [Brassica oleracea]	-	GO:0009536//plastid;GO:0044429//mitochondrial part	GO:0046914//transition metal ion binding;GO:0046983//protein dimerization activity	GO:0006221//pyrimidine nucleotide biosynthetic process;GO:0006605//protein targeting;GO:0006839//mitochondrial transport;GO:0009408//response to heat;GO:0019222//regulation of metabolic process;GO:0044267//cellular protein metabolic process
MSTRG.74842	--	0.11	0.14	0.07	0.66	1.48	0.68	0	0	0	0	0.94	0.1067	-3.139551352	0.001034772	0.010595762	-6.736965594	0.072660802	0.232051561	early nodulin-like protein 1 [Brassica napus]	-	GO:0005576//extracellular region;GO:0009536//plastid;GO:0031225//anchored component of membrane	-	-
MSTRG.74898	--	55.71	66.98	59.84	8.92	3.71	4.6	26.65	32.6	40.85	33.3667	5.7433	60.8433	3.405138993	1.17E-17	1.48E-15	-0.866691626	2.40E-05	0.000313244	BnaCnng15630D [Brassica napus]	-	-	-	-
MSTRG.74975	--	0.08	0.12	0.11	0.91	2	1.21	0.1	0.06	0.15	0.1033	1.3733	0.1033	-3.732304217	1.50E-06	3.19E-05	0	0.999158033	0.999488424	hypothetical protein HID58_023083 [Brassica napus]	-	-	-	-
MSTRG.75035	dnaJ	1.07	1.07	1.12	1.13	1.48	1.34	0.46	0.26	0.27	0.33	1.3167	1.0867	-0.276980689	0.325843521	0.735168949	-1.719371534	0.001548028	0.011148143	chaperone protein dnaJ C76, chloroplastic-like [Brassica napus]	-	GO:0009536//plastid	GO:0051540//metal cluster binding	GO:0050896//response to stimulus
MSTRG.75074	XTH24	4.7	3.86	6.69	17.52	73.63	25.04	0.96	1.45	1.8	1.4033	38.73	5.0833	-2.929604759	0.000102472	0.001424173	-1.856917104	1.32E-07	3.02E-06	PREDICTED: xyloglucan endotransglucosylase/hydrolase protein 24 [Brassica oleracea var. oleracea] [Brassica oleracea]	-	GO:0005576//extracellular region;GO:0005618//cell wall;GO:0009536//plastid;GO:0016020//membrane	GO:0046527//glucosyltransferase activity;GO:0052736//beta-glucanase activity	GO:0006073//cellular glucan metabolic process;GO:0006950//response to stress;GO:0009605//response to external stimulus;GO:0009733//response to auxin;GO:0009827//plant-type cell wall modification;GO:0010087//phloem or xylem histogenesis;GO:0010243//response to organonitrogen compound;GO:0010476//gibberellin mediated signaling pathway;GO:0044767//single-organism developmental process
MSTRG.75281	--	2.53	2.81	2.65	2.04	1.16	1.22	0.2	0.51	0.49	0.4	1.4733	2.6633	0.854149134	1.62E-06	3.42E-05	-2.735161097	7.78E-14	5.13E-12	unnamed protein product [Brassica napus]	-	-	-	-
MSTRG.75298	--	4.18	4.9	7.43	5.44	9.9	9.5	0.06	0.32	0.47	0.2833	8.28	5.5033	-0.589325053	0.942388268	0.994882214	-4.279733469	3.14E-20	4.70E-18	transmembrane protein [Arabidopsis thaliana]	-	-	-	-
MSTRG.75404	BGAL3	9.34	9.87	9.05	9.57	8.87	8.59	3.17	4.64	3.91	3.9067	9.01	9.42	0.064199954	1.21E-05	0.000210551	-1.269788896	1.44E-08	3.99E-07	PREDICTED: beta-galactosidase 3-like [Brassica oleracea var. oleracea] [Brassica oleracea]	-	-	-	-
MSTRG.7547	--	1.4	1.66	3.25	2.65	3.69	4.25	0.22	0.22	0.46	0.3	3.53	2.1033	-0.746990679	0.956124559	0.994882214	-2.809643099	8.69E-10	3.06E-08	BnaC07g15840D [Brassica napus]	-	-	-	-
MSTRG.7552	--	0.37	0.53	0.93	1.24	2.05	1.67	0.06	0.08	0.02	0.0533	1.6533	0.61	-1.438496472	0.009823885	0.067261647	-3.515699838	2.79E-07	5.92E-06	BnaC07g15840D [Brassica napus]	-	-	-	-
MSTRG.7555	--	0.29	0.34	0.23	0.92	1.41	1.56	0.04	0.12	0.04	0.0667	1.2967	0.2867	-2.17736159	0.004272549	0.034499908	-2.10433666	0.078227453	0.24443027	Integrase catalytic core [Arabidopsis suecica]	-	-	-	-
MSTRG.75579	ARR10	0.88	1.03	1.32	2.13	3.42	3.4	0.15	0.66	0.56	0.4567	2.9833	1.0767	-1.470353517	0.001441911	0.013971194	-1.237358272	0.03157443	0.125553166	PREDICTED: LOW QUALITY PROTEIN: two-component response regulator ARR10 [Brassica oleracea var. oleracea] [Brassica oleracea]	ko04075//Plant hormone signal transduction	GO:0043231//intracellular membrane-bounded organelle	GO:0001071//nucleic acid binding transcription factor activity;GO:0003676//nucleic acid binding	GO:0009735//response to cytokinin;GO:0009755//hormone-mediated signaling pathway;GO:0009845//seed germination;GO:0010075//regulation of meristem growth;GO:0010468//regulation of gene expression;GO:0034645//cellular macromolecule biosynthetic process;GO:0035556//intracellular signal transduction;GO:0048364//root development;GO:0080090//regulation of primary metabolic process;GO:0090056//regulation…
MSTRG.7562	--	0	0.1	0.07	1.24	2.02	2.28	0	0	0	0	1.8467	0.0567	-5.026279325	2.12E-10	9.31E-09	-5.824428435	0.238409491	0.520786947	01P13-2 [Brassica rapa subsp. pekinensis] [Brassica rapa]	-	-	-	-
MSTRG.75626	AtMg00810	0.27	0.45	0.83	0.75	0.98	0.95	0.08	0.08	0.19	0.1167	0.8933	0.5167	-0.789964785	0.674473109	0.940648981	-2.146841388	0.000245392	0.002344158	GAG-pre-integrase domain, partial [Arabidopsis suecica]	-	-	-	-
MSTRG.75627	--	1.18	1.41	1.97	1.6	2.91	3.25	0.27	0.1	0.03	0.1333	2.5867	1.52	-0.767022828	0.511654834	0.887345933	-3.510961919	2.32E-09	7.57E-08	GAG-pre-integrase domain, partial [Arabidopsis suecica]	-	-	-	-
MSTRG.75633	--	0.67	0.99	1.03	1.86	2.96	4.59	0	0.13	0.18	0.1033	3.1367	0.8967	-1.80658855	0.014594691	0.091829416	-3.117266052	0.002915693	0.018827025	BnaC07g15840D [Brassica napus]	-	-	-	-
MSTRG.75635	--	7.4	12.46	12.37	8.66	20.3	21.46	1.06	6.8	6.31	4.7233	16.8067	10.7433	-0.64559193	0.644762427	0.932788184	-1.18556443	8.06E-13	4.57E-11	BnaC07g15840D [Brassica napus]	-	-	-	-
MSTRG.75636	--	8.05	11.42	13.18	6.99	16.89	18.32	0.72	2.26	1.18	1.3867	14.0667	10.8833	-0.370160007	0.339312378	0.748697169	-2.972427558	4.55E-14	3.08E-12	hypothetical protein IGI04_042921 [Brassica rapa subsp. trilocularis] [Brassica rapa]	-	-	-	-
MSTRG.75642	--	0.44	0.57	0.86	1.06	1.46	1.79	0.05	0.05	0.04	0.0467	1.4367	0.6233	-1.204649599	0.104901198	0.384390376	-3.739539538	6.85E-06	0.000103243	01P13-2 [Brassica rapa subsp. pekinensis] [Brassica rapa]	-	-	-	-
MSTRG.75643	--	0.24	0.35	0.42	0.39	1.03	0.94	0	0	0	0	0.7867	0.3367	-1.224431567	0.261942479	0.65915879	-8.395177077	5.33E-05	0.000631654	01P13-2 [Brassica rapa subsp. pekinensis] [Brassica rapa]	-	-	-	-
MSTRG.75644	--	1.35	1.9	2.05	2.95	4.78	5.08	0.11	0.49	0.19	0.2633	4.27	1.7667	-1.273206211	0.110008836	0.396477854	-2.746067801	0.000663302	0.005456474	hypothetical protein IGI04_042233, partial [Brassica rapa subsp. trilocularis] [Brassica rapa]	-	-	-	-
MSTRG.75650	RE2	0.18	0.41	0.75	0.57	0.65	0.9	0.14	0.15	0.08	0.1233	0.7067	0.4467	-0.661831264	0.835131468	0.974366884	-1.856635825	0.007937007	0.042521389	01P13-1 [Brassica rapa subsp. pekinensis] [Brassica rapa]	-	-	-	-
MSTRG.75781	At1g13609	0.4	0.75	1.48	4.76	5.9	4.58	0.2	0.14	0.37	0.2367	5.08	0.8767	-2.534728198	3.97E-05	0.000610957	-1.88917187	0.063290778	0.209987741	PREDICTED: defensin-like protein 287 [Brassica oleracea var. oleracea] [Brassica oleracea]	-	GO:0043231//intracellular membrane-bounded organelle	-	GO:0051704//multi-organism process
MSTRG.75821	pol	6.61	7.23	7.31	8.97	11.02	9.3	2.48	4.26	3.42	3.3867	9.7633	7.05	-0.46975053	0.350136284	0.75903203	-1.057757261	0.000145742	0.001498088	Ribonuclease H-like superfamily [Arabidopsis suecica]	-	-	-	-
MSTRG.75960	--	0.72	1.67	1.16	2.17	1.93	2.34	0.1	0.27	0.08	0.15	2.1467	1.1833	-0.859241664	0.603707273	0.932788184	-2.979822118	0.004131133	0.024989975	-	-	-	-	-
MSTRG.7602	--	1.58	1.59	1.91	2.38	3.19	2.87	0.11	0.75	0.4	0.42	2.8133	1.6933	-0.732414502	0.57808018	0.921977198	-2.011404763	0.000361876	0.003267084	BnaA02g27610D [Brassica napus]	-	-	-	-
MSTRG.76065	DTX21	0.11	0	0	0	0.17	0.19	0.64	0.51	1.67	0.94	0.12	0.0367	-1.710493383	0.76832492	0.972275405	4.680119734	0.001570454	0.011287032	protein DETOXIFICATION 21-like [Brassica napus]	-	GO:0031224//intrinsic component of membrane	GO:0015291//secondary active transmembrane transporter activity	GO:0000097//sulfur amino acid biosynthetic process;GO:0009608//response to symbiont;GO:0015893//drug transport
MSTRG.76066	--	0	0	0	0.18	0.37	0.49	0.05	0.13	0	0.06	0.3467	0	-8.437405312	0.002891246	0.025070128	5.906890596	0.350615618	0.660374789	hypothetical protein F2Q68_00039486 [Brassica cretica]	-	-	-	-
MSTRG.76073	--	0.12	0.13	0.23	0.34	0.42	0	1.4	1.02	1.95	1.4567	0.2533	0.16	-0.662965013	0.981861433	0.994882214	3.186526969	5.54E-09	1.69E-07	Zinc finger CCHC-type [Arabidopsis suecica]	-	-	-	-
MSTRG.76074	--	0.66	0.31	0.35	0.17	0.21	0.22	1.25	2.29	2.26	1.9333	0.2	0.44	1.137503524	0.031543253	0.165476784	2.135514971	2.97E-05	0.000377817	Transposon En/Spm-like [Arabidopsis thaliana x Arabidopsis arenosa]	-	-	-	-
MSTRG.76107	--	0.55	0.97	0.87	0.33	1.07	0.65	0	0.15	0.18	0.11	0.6833	0.7967	0.221386708	0.147204149	0.475890992	-2.856472689	0.00278731	0.018132554	-	-	-	-	-
MSTRG.76115	--	1.39	1.36	1.47	2.48	3.95	3.52	0.14	0.42	0.57	0.3767	3.3167	1.4067	-1.237453527	0.001429481	0.013885041	-1.900920226	2.64E-05	0.000339899	ethylene responsive element binding factor -related [Brassica oleracea]	-	-	-	-
MSTRG.76185	UBC18	0	0	0.19	0.12	1.11	0.4	1.13	0.48	0.44	0.6833	0.5433	0.0633	-3.100800641	0.112599527	0.402069465	3.431552586	0.008210786	0.043737212	PREDICTED: probable ubiquitin-conjugating enzyme E2 18 isoform X2 [Brassica oleracea var. oleracea] [Brassica oleracea]	ko04120//Ubiquitin mediated proteolysis	-	-	-
MSTRG.76190	--	2.04	1.7	2.41	6.06	7.05	5.39	2.45	1.88	2.18	2.17	6.1667	2.05	-1.588866955	0.001559928	0.014955359	0.082071133	0.59717581	0.861166066	BnaC08g09670D [Brassica napus]	-	-	-	-
MSTRG.76201	VAB	1.7	2.07	2.68	2.78	2.84	3.02	0.52	0.81	1.14	0.8233	2.88	2.15	-0.421732152	0.443957898	0.842421768	-1.384788119	0.00040062	0.003555188	BnaA08g29430D [Brassica napus]	-	GO:0009536//plastid	GO:0005543//phospholipid binding	GO:0050794//regulation of cellular process
MSTRG.76228	ATR1	0.55	0.63	0.63	0.76	0.63	0.49	1.28	1.02	1.69	1.33	0.6267	0.6033	-0.054742965	0.316695893	0.724394725	1.140399049	0.004513314	0.026908267	NADPH--cytochrome P450 reductase 1-like [Brassica napus]	-	GO:0031090//organelle membrane;GO:0043231//intracellular membrane-bounded organelle;GO:0044444//cytoplasmic part	GO:0016653//oxidoreductase activity, acting on NAD(P)H, heme protein as acceptor;GO:0032553//ribonucleotide binding;GO:0046914//transition metal ion binding	GO:0001101//response to acid chemical;GO:0006725//cellular aromatic compound metabolic process;GO:0006979//response to oxidative stress;GO:0010033//response to organic substance;GO:0016482//cytoplasmic transport;GO:0044710//single-organism metabolic process
MSTRG.76243	--	0.36	0	0.13	0	0	0	0.39	1.5	1.96	1.2833	0	0.1633	7.351675438	0.06529806	0.280206839	2.974004791	0.003735819	0.023048189	BnaC03g27240D [Brassica napus]	-	-	-	-
MSTRG.76339	BAM5	1.44	2.6	1.9	5.25	5.28	4.4	8.81	1.81	4.25	4.9567	4.9767	1.98	-1.329679329	0.004504776	0.03597404	1.323869811	0.004641898	0.027507403	beta-amylase 5 [Brassica napus]	-	GO:0009536//plastid	GO:0016160//amylase activity	GO:0005982//starch metabolic process;GO:0051707//response to other organism
MSTRG.76409	OEP162	3.58	2.59	4.01	1.79	0.77	1.6	6.88	7.03	8.82	7.5767	1.3867	3.3933	1.291082128	8.26E-09	2.76E-07	1.158860123	1.90E-10	7.42E-09	BnaC03g42500D [Brassica napus]	-	-	-	-
MSTRG.76480	--	3.78	3.04	4.14	3.44	4.65	5.13	0.74	1.74	0.95	1.1433	4.4067	3.6533	-0.270474379	0.1823247	0.539398251	-1.675967317	0.000194815	0.00192544	BnaC09g21930D [Brassica napus]	-	-	-	-
MSTRG.76490	RPP5	0.39	0.44	0.26	0.33	0.37	0.47	0.86	1.22	1.02	1.0333	0.39	0.3633	-0.102180395	0.187822267	0.548626027	1.50794008	2.55E-06	4.28E-05	PREDICTED: disease resistance protein RPP4-like isoform X1 [Camelina sativa]	-	GO:0043231//intracellular membrane-bounded organelle;GO:0044444//cytoplasmic part	GO:0036094//small molecule binding	GO:0009617//response to bacterium;GO:0009725//response to hormone;GO:0009863//salicylic acid mediated signaling pathway;GO:0050832//defense response to fungus
MSTRG.76521	ZIFL2	2.22	2.09	2.49	1.55	1.25	1.81	5.87	2.9	5.18	4.65	1.5367	2.2667	0.560767996	1.27E-06	2.73E-05	1.036658471	7.47E-05	0.000844098	PREDICTED: probable peptide/nitrate transporter At3g43790 isoform X4 [Brassica oleracea var. oleracea] [Brassica oleracea]	-	GO:0031224//intrinsic component of membrane	GO:0022891//substrate-specific transmembrane transporter activity	GO:0006812//cation transport;GO:0044763//single-organism cellular process;GO:0051707//response to other organism
MSTRG.76526	--	0.6	0	0	2.82	2.5	1.49	11.7	0.79	2.19	4.8933	2.27	0.2	-3.504620392	0.003385173	0.028566128	4.612745657	0.02483794	0.104265296	BnaA02g11320D [Brassica napus]	-	-	GO:0003676//nucleic acid binding;GO:0005515//protein binding	-
MSTRG.76570	HSP90-7	2.13	2.6	2.83	4.84	4.82	5.68	0.32	0.58	0.44	0.4467	5.1133	2.52	-1.020840343	0.011425036	0.075728338	-2.496153234	4.86E-15	3.76E-13	PREDICTED: endoplasmin homolog [Brassica oleracea var. oleracea] [Brassica oleracea]	ko04626//Plant-pathogen interaction;ko04141//Protein processing in endoplasmic reticulum	GO:0005576//extracellular region;GO:0005911//cell-cell junction;GO:0009536//plastid;GO:0031090//organelle membrane;GO:0044432//endoplasmic reticulum part	GO:0005515//protein binding;GO:0032550//purine ribonucleoside binding	GO:0000302//response to reactive oxygen species;GO:0006006//glucose metabolic process;GO:0006090//pyruvate metabolic process;GO:0006498//N-terminal protein lipidation;GO:0006970//response to osmotic stress;GO:0006996//organelle organization;GO:0009642//response to light intensity;GO:0009933//meristem structural organization;GO:0010038//response to metal ion;GO:0015031//protein transport;GO:003355…
MSTRG.76723	At1g10030	2.36	2.61	2.97	4.46	5.38	5.75	0.6	1.54	1.28	1.14	5.1967	2.6467	-0.973410016	0.118286064	0.415094164	-1.215142682	0.007990113	0.042763351	PREDICTED: ergosterol biosynthetic protein 28-like [Camelina sativa]	-	GO:0031090//organelle membrane;GO:0031224//intrinsic component of membrane	-	GO:0006694//steroid biosynthetic process;GO:0016104//triterpenoid biosynthetic process
MSTRG.76763	RPL10	1.7	1.65	2.18	2.44	4.69	4.16	0.1	0.91	0.37	0.46	3.7633	1.8433	-1.029694101	0.180271104	0.535884259	-2.002611213	0.004162434	0.025140857	Ribosomal protein L10 family protein [Arabidopsis thaliana]	ko03010//Ribosome	-	-	-
MSTRG.76850	At3g44810	2.55	2.24	2.18	4.98	6.07	5.84	0.75	1.29	1.01	1.0167	5.63	2.3233	-1.276938767	0.000950939	0.009855707	-1.192349413	0.002084978	0.014281933	PREDICTED: F-box/LRR-repeat protein At1g06630-like [Brassica oleracea var. oleracea] [Brassica oleracea]	-	GO:0031090//organelle membrane;GO:0043231//intracellular membrane-bounded organelle	-	-
MSTRG.76968	--	16.4	19.05	16.96	28.13	38.93	38.7	1.58	7.15	5.59	4.7733	35.2533	17.47	-1.012880068	0.000743568	0.008011858	-1.871810616	1.87E-05	0.000251367	Harbinger transposase-derived protein [Arabidopsis suecica]	-	-	-	-
MSTRG.76978	CAP10B	5.9	5.27	4.43	8.54	6.48	6.47	0	0.49	0.78	0.4233	7.1633	5.2	-0.462119454	0.612401422	0.932788184	-3.618645627	5.47E-09	1.67E-07	chlorophyll a-b binding protein CP24 10A, chloroplastic [Olea europaea var. sylvestris] [Olea europaea]	ko01100//Metabolic pathways;ko00196//Photosynthesis - antenna proteins	GO:0009523//photosystem II;GO:0009526//plastid envelope;GO:0031224//intrinsic component of membrane;GO:0031976//plastid thylakoid;GO:0044434//chloroplast part	GO:0043169//cation binding;GO:0046906//tetrapyrrole binding	GO:0000097//sulfur amino acid biosynthetic process;GO:0006091//generation of precursor metabolites and energy;GO:0006970//response to osmotic stress;GO:0006996//organelle organization;GO:0031399//regulation of protein modification process;GO:0070838//divalent metal ion transport;GO:1990066//energy quenching
MSTRG.77167	--	3.78	3.72	3.43	4.47	5	5.8	0.93	2.16	1.17	1.42	5.09	3.6433	-0.482406661	0.804991104	0.97358954	-1.359368065	0.004400933	0.02632405	-	-	-	-	-
MSTRG.77248	Os03g0733400	1.37	1.9	1.55	4.18	6.85	4.85	0.12	0.53	0.23	0.2933	5.2933	1.6067	-1.720105861	2.69E-07	6.68E-06	-2.453457718	2.76E-06	4.59E-05	zinc finger BED domain-containing protein RICESLEEPER 2-like [Brassica rapa]	-	-	-	-
MSTRG.77315	RE2	24	18.43	25.94	18.65	24.99	20.21	83.51	63.02	83.64	76.7233	21.2833	22.79	0.098676805	1.42E-07	3.74E-06	1.751264477	1.54E-24	3.65E-22	Reverse transcriptase RNA-dependent DNA polymerase [Arabidopsis suecica]	-	-	-	-
MSTRG.77384	--	3.07	2.82	2.42	6.94	8.8	7.93	0.93	1.14	1.1	1.0567	7.89	2.77	-1.510139324	1.16E-05	0.000202865	-1.390365637	9.56E-05	0.001043685	hypothetical protein HID58_081896, partial [Brassica napus]	-	-	-	-
MSTRG.77437	PBL1	0	0	0	0	0	0	17.95	2.74	4.1	8.2633	0	0	0	1	1	13.01250815	5.07E-09	1.56E-07	BnaC03g44910D [Brassica napus]	-	-	-	-
MSTRG.77438	BSMT1	1.45	0.73	0.6	0	0	0	12.09	8.91	11.35	10.7833	0	0.9267	9.855906667	7.15E-13	4.45E-11	3.540608924	1.62E-26	4.81E-24	S-adenosyl-L-methionine-dependent methyltransferase [Arabidopsis thaliana x Arabidopsis arenosa]	-	-	GO:0008168//methyltransferase activity	GO:0006631//fatty acid metabolic process;GO:0006721//terpenoid metabolic process;GO:0010087//phloem or xylem histogenesis;GO:0044260//cellular macromolecule metabolic process
MSTRG.77535	CBP60B	0.09	0.08	0	0.06	0.15	0.06	0.5	0.66	0.55	0.57	0.09	0.0567	-0.667424661	0.918267327	0.994882214	3.330389674	0.006204301	0.034814783	calmodulin-binding protein 60 B-like [Brassica napus]	-	-	GO:0005515//protein binding	GO:0006486//protein glycosylation
MSTRG.77539	XTH25	19.54	9.48	17.26	0.56	0.16	0.38	238.7	167.07	231.21	212.3267	0.3667	15.4267	5.394813436	1.26E-23	3.45E-21	3.782787306	7.64E-46	1.37E-42	PREDICTED: probable xyloglucan endotransglucosylase/hydrolase protein 25 [Brassica oleracea var. oleracea] [Brassica oleracea]	-	GO:0005576//extracellular region;GO:0009536//plastid;GO:0030312//external encapsulating structure	GO:0016758//transferase activity, transferring hexosyl groups;GO:0016787//hydrolase activity	GO:0006950//response to stress;GO:0009605//response to external stimulus;GO:0009725//response to hormone;GO:0010243//response to organonitrogen compound;GO:0044042//glucan metabolic process;GO:0071555//cell wall organization
MSTRG.7756	--	0.77	1.2	1.26	1.13	3.04	1.81	0.04	0.42	0.39	0.2833	1.9933	1.0767	-0.88861132	0.485885479	0.872004888	-1.925999419	0.00862765	0.045537572	BnaAnng09140D [Brassica napus]	ko03420//Nucleotide excision repair;ko03440//Homologous recombination;ko03030//DNA replication;ko03430//Mismatch repair	-	-	-
MSTRG.77613	--	0.9	1.29	1.71	2.03	4.06	4.06	0.06	0.16	0.3	0.1733	3.3833	1.3	-1.379933698	0.048333556	0.226721184	-2.906890596	0.000216078	0.002102478	PREDICTED: MATH domain and coiled-coil domain-containing protein At2g42470-like [Brassica oleracea var. oleracea] [Brassica oleracea]	-	-	-	-
MSTRG.77620	--	1.03	1.06	1.13	1.75	1.83	2.26	0.18	0.41	0.37	0.32	1.9467	1.0733	-0.858907681	0.463247992	0.857642881	-1.745954377	0.003611598	0.022427013	BnaC04g53400D [Brassica napus]	-	-	-	-
MSTRG.7772	RPL12A	5.03	6.6	7.67	18.69	26.89	24.16	6.75	3.47	7.03	5.75	23.2467	6.4333	-1.853385517	2.19E-11	1.12E-09	-0.162004486	0.857768821	0.937926706	BnaCnng58960D [Brassica napus]	ko03010//Ribosome	GO:0000315//organellar large ribosomal subunit;GO:0009532//plastid stroma;GO:0044434//chloroplast part	GO:0005198//structural molecule activity	GO:0009617//response to bacterium;GO:0009725//response to hormone;GO:0010467//gene expression;GO:0032774//RNA biosynthetic process
MSTRG.77786	CHX20	0	0.02	0	0.04	0.03	0.05	0.53	0.14	0.27	0.3133	0.04	0.0067	-2.584962501	0.289238185	0.693206105	5.554588852	5.32E-05	0.000630522	PREDICTED: cation/H(+) antiporter 20 isoform X1 [Camelina sativa]	-	GO:0009536//plastid;GO:0031224//intrinsic component of membrane	GO:0005451//monovalent cation:proton antiporter activity	GO:0006605//protein targeting;GO:0006814//sodium ion transport;GO:0006875//cellular metal ion homeostasis;GO:0015992//proton transport;GO:0055067//monovalent inorganic cation homeostasis
MSTRG.7783	S2	386.53	379.35	402.54	142.28	79.11	112.47	1083.81	747.53	760.62	863.9867	111.2867	389.4733	1.8072438	1.01E-13	7.14E-12	1.149484496	5.05E-10	1.84E-08	oleosin S2-2 [Brassica rapa]	-	GO:0005811//lipid particle;GO:0031224//intrinsic component of membrane	-	GO:0003006//developmental process involved in reproduction;GO:0009409//response to cold;GO:0009639//response to red or far red light;GO:0009756//carbohydrate mediated signaling;GO:0032446//protein modification by small protein conjugation;GO:0044085//cellular component biogenesis;GO:0048507//meristem development;GO:0048580//regulation of post-embryonic development;GO:0051235//maintenance of locat…
MSTRG.7784	OL2	24.41	20.33	22.72	9.98	7.44	10.44	60.03	42.03	45.41	49.1567	9.2867	22.4867	1.27583706	4.41E-22	9.80E-20	1.128317272	4.82E-09	1.49E-07	oleosin S2-2-like [Brassica napus]	-	GO:0005811//lipid particle;GO:0031224//intrinsic component of membrane	-	GO:0003006//developmental process involved in reproduction;GO:0009409//response to cold;GO:0009639//response to red or far red light;GO:0009756//carbohydrate mediated signaling;GO:0032446//protein modification by small protein conjugation;GO:0044085//cellular component biogenesis;GO:0048507//meristem development;GO:0048580//regulation of post-embryonic development;GO:0051235//maintenance of locat…
MSTRG.77918	PUB3	0.9	0.83	1.38	1.37	1.54	1.64	0.09	0.42	0.1	0.2033	1.5167	1.0367	-0.548951965	0.895213389	0.994882214	-2.350033433	0.00034469	0.003133755	PREDICTED: U-box domain-containing protein 3-like isoform X1 [Brassica oleracea var. oleracea] [Brassica oleracea]	-	-	GO:0003824//catalytic activity	GO:0032446//protein modification by small protein conjugation
MSTRG.77945	--	0	0	0	0.01	0	0	0.04	0.09	0.2	0.11	0.0033	0	-1.736965594	0.983134282	0.994882214	6.781359714	0.000132893	0.001384549	Zinc finger CCHC-type [Arabidopsis thaliana x Arabidopsis arenosa]	-	-	-	-
MSTRG.77989	FER3	1.85	1.45	1.99	5	5.86	4.72	1.07	0.94	0.79	0.9333	5.1933	1.7633	-1.558355606	0.000135312	0.0018236	-0.917840895	0.03844244	0.145447889	ferritin-1 [Zea mays]	-	GO:0009526//plastid envelope;GO:0009532//plastid stroma;GO:0044434//chloroplast part	GO:0005506//iron ion binding;GO:0016724//oxidoreductase activity, oxidizing metal ions, oxygen as acceptor	GO:0000041//transition metal ion transport;GO:0001101//response to acid chemical;GO:0006979//response to oxidative stress;GO:0009058//biosynthetic process;GO:0009668//plastid membrane organization;GO:0010038//response to metal ion;GO:0044237//cellular metabolic process;GO:0044710//single-organism metabolic process;GO:0046916//cellular transition metal ion homeostasis;GO:0048827//phyllome developm…
MSTRG.78179	GSH1	34.41	33.34	35.42	52.99	69.31	68.91	108.22	51.28	82.68	80.7267	63.7367	34.39	-0.890134454	0.004058668	0.033069759	1.231056206	3.33E-07	6.94E-06	PREDICTED: glutamate--cysteine ligase, chloroplastic [Brassica oleracea var. oleracea] [Brassica oleracea]	ko01100//Metabolic pathways;ko00270//Cysteine and methionine metabolism;ko00480//Glutathione metabolism	GO:0009532//plastid stroma	GO:0016881//acid-amino acid ligase activity;GO:0032550//purine ribonucleoside binding	GO:0000097//sulfur amino acid biosynthetic process;GO:0000302//response to reactive oxygen species;GO:0001101//response to acid chemical;GO:0006006//glucose metabolic process;GO:0006090//pyruvate metabolic process;GO:0006749//glutathione metabolic process;GO:0006970//response to osmotic stress;GO:0009620//response to fungus;GO:0009625//response to insect;GO:0010038//response to metal ion;GO:00197…
MSTRG.78187	At4g22990	3.11	2.38	3.12	1.56	1.56	1.67	10.15	5.11	8.34	7.8667	1.5967	2.87	0.845987582	7.72E-14	5.57E-12	1.454701717	1.83E-08	4.95E-07	SPX domain-containing membrane protein At4g22990 isoform X1 [Brassica rapa]	-	GO:0031224//intrinsic component of membrane;GO:0043231//intracellular membrane-bounded organelle	-	GO:0044763//single-organism cellular process
MSTRG.7820	FIGL1	0.98	1.48	2.08	1.26	1.93	2.51	0.16	0.18	0.23	0.19	1.9	1.5133	-0.328269622	0.484833894	0.87103477	-2.993658473	7.37E-07	1.41E-05	ATPase family AAA domain-containing protein FIGL1-like [Brassica napus]	-	-	GO:0032550//purine ribonucleoside binding;GO:0042623//ATPase activity, coupled	-
MSTRG.78531	--	0.75	0.9	2.34	1.44	1.07	1.07	10.93	5.54	6.56	7.6767	1.1933	1.33	0.156429159	0.225250666	0.607622229	2.52905376	3.01E-08	7.78E-07	hypothetical protein F2Q68_00001654 [Brassica cretica]	-	-	-	-
MSTRG.78552	--	0.08	0	0	0.25	1.37	1.41	0	0	0	0	1.01	0.0267	-5.243173983	0.002297333	0.020701036	-4.736965594	0.844666575	0.931138542	mitochondrial zinc maintenance protein 1, mitochondrial-like [Brassica napus]	-	-	-	-
MSTRG.78571	--	0.86	0.35	1.79	4.9	5.12	5.15	0	0	0.13	0.0433	5.0567	1	-2.33818668	2.83E-05	0.000450152	-4.528378972	8.41E-05	0.000934105	protein ALP1-like isoform X1 [Brassica rapa]	-	-	-	-
MSTRG.78582	PRP8A	1.6	1.9	1.88	1.95	1.81	2.76	5.12	4.07	4.49	4.56	2.1733	1.7933	-0.277265792	0.389170643	0.796868929	1.346390152	4.15E-06	6.60E-05	BnaC08g04400D [Brassica napus]	ko03040//Spliceosome	GO:0030529//intracellular ribonucleoprotein complex	GO:0017069//snRNA binding	GO:0030908//protein splicing
MSTRG.78602	CPN60A1	0.96	0.68	0.88	0.34	0.21	0.4	2.09	1.87	2.14	2.0333	0.3167	0.84	1.407424315	0.000217845	0.00277808	1.275385509	0.000154783	0.001578305	PREDICTED: ruBisCO large subunit-binding protein subunit alpha, chloroplastic-like [Brassica oleracea var. oleracea] [Brassica oleracea]	-	GO:0005576//extracellular region;GO:0005840//ribosome;GO:0009526//plastid envelope;GO:0009532//plastid stroma	-	GO:0003006//developmental process involved in reproduction;GO:0009058//biosynthetic process;GO:0009657//plastid organization;GO:0044267//cellular protein metabolic process;GO:0044767//single-organism developmental process
MSTRG.78674	--	0.65	1.02	1.26	2.98	4.22	5.17	0.38	0.34	0.11	0.2767	4.1233	0.9767	-2.077872931	7.76E-06	0.000141089	-1.819717423	0.008803683	0.046253694	GAG-pre-integrase domain, partial [Arabidopsis suecica]	-	-	-	-
MSTRG.78686	--	1.06	0.87	2.07	0.32	0.28	0.42	0.85	0.93	1.06	0.9467	0.34	1.3333	1.971430848	6.09E-08	1.73E-06	-0.49410907	0.383250103	0.692244089	unnamed protein product, partial [Brassica napus]	-	-	-	-
MSTRG.78824	GH3.3	6.86	6.08	10.29	5.94	8.34	10.76	1.91	5.03	3.51	3.4833	8.3467	7.7433	-0.108245408	0.02366883	0.133049386	-1.152486212	0.002970846	0.019123823	PREDICTED: indole-3-acetic acid-amido synthetase GH3.3 [Brassica oleracea var. oleracea] [Brassica oleracea]	ko04075//Plant hormone signal transduction	-	GO:0016881//acid-amino acid ligase activity	GO:0009725//response to hormone;GO:0014070//response to organic cyclic compound;GO:0048878//chemical homeostasis
MSTRG.78832	SDR3a	0.65	0.86	0.6	8.13	7.96	6.45	1.47	1.04	1.9	1.47	7.5133	0.7033	-3.417172611	1.20E-19	1.96E-17	1.063535657	0.011230511	0.056206323	PREDICTED: short-chain dehydrogenase reductase 3a isoform X2 [Brassica oleracea var. oleracea] [Brassica oleracea]	-	-	GO:0016491//oxidoreductase activity	GO:0044710//single-organism metabolic process
MSTRG.78848	SNRNP25	0.23	0	0.21	0	0	0	0	0	0.15	0.05	0	0.1467	7.196397213	0.002682106	0.023533406	-1.552541023	0.461741125	0.766953424	PREDICTED: U11/U12 small nuclear ribonucleoprotein 25 kDa protein [Raphanus sativus]	-	-	-	-
MSTRG.79018	--	0.16	0.03	0.12	0.94	1.8	1.87	0.03	0	0	0.01	1.5367	0.1033	-3.89442663	5.79E-07	1.34E-05	-3.36923381	0.117352997	0.324287088	BnaC07g49620D [Brassica napus]	-	-	-	-
MSTRG.79188	--	1.79	1.95	2.16	5.24	5.38	3.61	0.31	0.69	0.65	0.55	4.7433	1.9667	-1.270148802	0.0051838	0.040280387	-1.83824893	3.31E-06	5.40E-05	nuclear protein [Arabidopsis thaliana]	-	GO:0005576//extracellular region;GO:0009526//plastid envelope;GO:0009532//plastid stroma	GO:0016614//oxidoreductase activity, acting on CH-OH group of donors;GO:0048037//cofactor binding	GO:0006739//NADP metabolic process;GO:0009668//plastid membrane organization;GO:0009887//organ morphogenesis;GO:0016109//tetraterpenoid biosynthetic process;GO:0048869//cellular developmental process
MSTRG.79263	At1g14780	2.64	2.37	2.96	3.1	2.57	3.58	1.21	0.62	0.75	0.86	3.0833	2.6567	-0.214873641	0.091357071	0.351488309	-1.627208659	4.01E-06	6.41E-05	PREDICTED: MACPF domain-containing protein At1g14780-like [Brassica oleracea var. oleracea] [Brassica oleracea]	-	GO:0043231//intracellular membrane-bounded organelle	-	GO:0006812//cation transport;GO:0033554//cellular response to stress
MSTRG.79411	--	0.56	1.31	1.28	0.89	1.49	1.3	2.05	2.07	2.21	2.11	1.2267	1.05	-0.224353938	0.355021166	0.764056332	1.006853671	0.003336395	0.021020265	unnamed protein product [Brassica napus]	-	-	-	-
MSTRG.79656	CSP41B	0.58	0.48	0.45	0.43	0.39	0.38	0.07	0.15	0.06	0.0933	0.4	0.5033	0.331514144	0.073966974	0.305653375	-2.431049817	0.00323083	0.02048558	chloroplast stem-loop binding protein of 41 kDa b, chloroplastic [Eutrema salsugineum]	-	GO:0005576//extracellular region;GO:0005911//cell-cell junction;GO:0009526//plastid envelope;GO:0009532//plastid stroma;GO:0030529//intracellular ribonucleoprotein complex;GO:0042579//microbody;GO:0044434//chloroplast part	GO:0003723//RNA binding	GO:0006090//pyruvate metabolic process;GO:0006091//generation of precursor metabolites and energy;GO:0006355//regulation of transcription, DNA-templated;GO:0006417//regulation of translation;GO:0006605//protein targeting;GO:0006633//fatty acid biosynthetic process;GO:0006739//NADP metabolic process;GO:0006779//porphyrin-containing compound biosynthetic process;GO:0009414//response to water depriv…
MSTRG.79730	At3g07100	0.03	0.28	0.11	1.32	4.05	1.84	0	0	0	0	2.4033	0.14	-4.101538026	3.04E-08	9.14E-07	-7.129283017	0.024312172	0.10249343	protein transport protein Sec24-like At3g07100 [Brassica rapa]	ko04141//Protein processing in endoplasmic reticulum	-	-	-
MSTRG.79776	--	8.82	8.34	8.19	9.82	17.37	17.61	1.34	4.46	1.7	2.5	14.9333	8.45	-0.821512985	0.343341089	0.752304778	-1.757023247	0.000229181	0.002213902	BnaA05g20280D [Brassica napus]	-	-	-	-
MSTRG.7978	--	0.33	0.57	0.91	1.04	1.47	1.55	0.11	0.04	0	0.05	1.3533	0.6033	-1.16549003	0.207999567	0.580744101	-3.592955291	0.001141354	0.00863957	hypothetical protein IGI04_042978 [Brassica rapa subsp. trilocularis] [Brassica rapa]	-	-	-	-
MSTRG.7979	--	0.26	0.23	0.31	0.42	1.54	1.63	0	0	0.03	0.01	1.1967	0.2667	-2.165911939	0.015235426	0.095160182	-4.736965594	0.005729621	0.032689259	hypothetical protein IGI04_042978 [Brassica rapa subsp. trilocularis] [Brassica rapa]	-	-	-	-
MSTRG.79998	FBL23	0.46	0.79	0.72	0.76	0.26	0.33	0	0	0.06	0.02	0.45	0.6567	0.545236222	0.149032633	0.479206603	-5.037089319	0.001575088	0.011312851	BnaC09g00920D [Brassica napus]	-	-	-	GO:0019941//modification-dependent protein catabolic process
MSTRG.80004	--	0.47	0.34	0.19	0.09	0	0	18.15	14.61	20.71	17.8233	0.03	0.3333	3.473931188	0.000299231	0.003658631	5.740657772	1.38E-75	8.40E-72	hypothetical protein F2Q69_00009836 [Brassica cretica]	-	-	-	-
MSTRG.80148	--	0.12	0.04	0	0	0.03	0	2.16	1.15	1.16	1.49	0.01	0.0533	2.415037499	0.266001788	0.664464591	4.804131021	4.79E-08	1.19E-06	hypothetical protein F2Q69_00003190 [Brassica cretica]	-	-	-	-
MSTRG.80153	--	3.68	2.8	3.24	1.51	1.11	0.58	14.2	8.74	11.53	11.49	1.0667	3.24	1.602884409	4.46E-05	0.000677293	1.82631308	4.32E-08	1.08E-06	BnaA04g12410D [Brassica napus]	-	-	-	-
MSTRG.80306	ABCF2	0.21	0.18	0.07	0	0.05	0	0.22	0.07	0	0.0967	0.0167	0.1533	3.201633861	0.002423778	0.021645008	-0.665580961	0.563949807	0.844022322	ABC transporter F family member 2 [Brassica napus]	-	-	GO:0016887//ATPase activity	-
MSTRG.80328	CYP78A7	0.37	0.39	0.19	0.3	0.49	0.49	0.89	0.68	2.12	1.23	0.4267	0.3167	-0.430144392	0.803162043	0.97358954	1.957621398	0.000883701	0.006947241	PREDICTED: cytochrome P450 78A7 [Brassica oleracea var. oleracea] [Brassica oleracea]	-	GO:0031224//intrinsic component of membrane	GO:0016709//oxidoreductase activity, acting on paired donors, with incorporation or reduction of molecular oxygen, NAD(P)H as one donor, and incorporation of one atom of oxygen;GO:0046906//tetrapyrrole binding;GO:0046914//transition metal ion binding	GO:0044710//single-organism metabolic process;GO:0048444//floral organ morphogenesis;GO:0048509//regulation of meristem development
MSTRG.80399	--	10.53	10.32	13.89	22.29	22.88	34.05	1.21	2.84	3.2	2.4167	26.4067	11.58	-1.189266947	0.00041266	0.00482701	-2.260544854	1.55E-12	8.48E-11	Harbinger transposase-derived protein [Arabidopsis suecica]	-	-	-	-
MSTRG.80452	TK1B	1.05	0.66	1.17	1.15	2.26	2.81	2.84	2.35	2.19	2.46	2.0733	0.96	-1.110845769	0.272022423	0.671652807	1.357552005	0.000295938	0.002748661	thymidine kinase b-like [Brassica napus]	ko01100//Metabolic pathways;ko00240//Pyrimidine metabolism	GO:0043231//intracellular membrane-bounded organelle	GO:0005515//protein binding;GO:0019136//deoxynucleoside kinase activity;GO:0032550//purine ribonucleoside binding;GO:0043167//ion binding	GO:0006259//DNA metabolic process;GO:0009124//nucleoside monophosphate biosynthetic process
MSTRG.80465	--	7.02	10.11	10.4	39.12	37.71	44.57	0.22	1.09	0.53	0.6133	40.4667	9.1767	-2.140691907	1.80E-22	4.13E-20	-3.903226939	1.21E-18	1.51E-16	Reverse transcriptase zinc-binding domain [Arabidopsis suecica]	-	-	-	-
MSTRG.80500	--	1.26	1.14	1.06	1.34	1.08	1.48	8.97	5.8	7.37	7.38	1.3	1.1533	-0.172702086	0.16888342	0.516454081	2.677811279	1.04E-25	2.80E-23	BnaC05g24090D [Brassica napus]	-	-	-	-
MSTRG.80517	--	6.68	7.08	6.35	5.92	6.01	4.41	14.62	12.65	14.54	13.9367	5.4467	6.7033	0.299505098	0.00130612	0.012873397	1.055934962	8.35E-07	1.58E-05	unnamed protein product [Brassica napus]	-	-	-	-
MSTRG.80522	--	0	0	0.11	0	0	0	0.25	1.49	0.84	0.86	0	0.0367	5.196397213	0.652519442	0.932788184	4.551795637	0.006074231	0.034228193	BnaUnng03920D, partial [Brassica napus]	-	-	-	-
MSTRG.80528	CYTC-2	0.8	0.3	1.13	1.35	1.32	1.67	6.26	3.87	4.85	4.9933	1.4467	0.7433	-0.960651333	0.425788218	0.827965372	2.747922009	2.74E-11	1.22E-09	PREDICTED: LOW QUALITY PROTEIN: cytochrome c-2-like [Brassica oleracea var. oleracea] [Brassica oleracea]	-	GO:0031090//organelle membrane;GO:0031970//organelle envelope lumen;GO:0043231//intracellular membrane-bounded organelle;GO:0044425//membrane part;GO:0044444//cytoplasmic part	GO:0046906//tetrapyrrole binding;GO:0046914//transition metal ion binding	GO:0006006//glucose metabolic process
MSTRG.80550	--	2.39	1.62	3.21	0.17	0.06	0.05	1.35	2.29	1.08	1.5733	0.0933	2.4067	4.688500105	3.69E-11	1.82E-09	-0.613211978	0.333225523	0.641118253	F27F5.21 [Arabidopsis thaliana]	-	-	-	-
MSTRG.80560	ABCC4	0.66	1.7	1.2	5.04	5.29	4.39	0.87	0.57	0.76	0.7333	4.9067	1.1867	-2.047828525	6.83E-07	1.57E-05	-0.694373717	0.176095939	0.427537967	PREDICTED: LOW QUALITY PROTEIN: ABC transporter C family member 4-like [Brassica oleracea var. oleracea] [Brassica oleracea]	ko02010//ABC transporters	GO:0031224//intrinsic component of membrane	GO:0015405//P-P-bond-hydrolysis-driven transmembrane transporter activity;GO:0016628//oxidoreductase activity, acting on the CH-CH group of donors, NAD or NADP as acceptor;GO:0017111//nucleoside-triphosphatase activity;GO:0032550//purine ribonucleoside binding	GO:0044710//single-organism metabolic process;GO:0044763//single-organism cellular process;GO:0051234//establishment of localization
[truncated: 13,376 more rows]
