# Supplementary material for: Effects of Low Nighttime Temperature on Fatty Acid Content in Developing Seeds from Brassica napus L. Based on RNA-Seq and Metabolome
Source: Plants (Basel). 2023 Jan 10;12(2):325. doi: 10.3390/plants12020325 (PMC9862530; doi:10.3390/plants12020325)
Supplement: Supplementary file 1 [file plants-12-00325-s001.zip › Table S5.xls]

Table S5 Analysis of DEGs from WTSL in LNT
id	Symbol	SFE13-1	SFE13-2	SFE13-3	SSE13-1	SSE13-2	SSE13-3	STE13-1	STE13-2	STE13-3	STE13	SSE13	SFE13	SSE13-vs-SFE13-log2fc	SSE13-vs-SFE13-pvalue	SSE13-vs-SFE13-fdr	SFE13-vs-STE13-log2fc	SFE13-vs-STE13-pvalue	SFE13-vs-STE13-fdr	Description	Pathway	GO Component	GO Function	GO Process
MSTRG.10432	NET4B	33.16	30.32	31.53	4.71	3.83	4.97	31.48	32.48	36.18	33.38	4.5033	31.67	2.814051693	3.61E-160	2.17E-157	0.075867087	3.04E-05	0.000934348	protein NETWORKED 4B-like [Brassica rapa]	-	-	-	-
MSTRG.10448	GSTF10	4.6	2.98	4.37	3.13	4.72	3.72	8.43	7.61	9.16	8.4	3.8567	3.9833	0.046621754	0.023613035	0.080331626	1.076413116	3.89E-09	2.92E-07	PREDICTED: glutathione S-transferase F10 [Camelina sativa]	ko00480//Glutathione metabolism	GO:0005576//extracellular region;GO:0005911//cell-cell junction;GO:0009532//plastid stroma;GO:0016020//membrane;GO:0030312//external encapsulating structure	GO:0004601//peroxidase activity;GO:0016765//transferase activity, transferring alkyl or aryl (other than methyl) groups;GO:0043168//anion binding;GO:0046914//transition metal ion binding	GO:0006006//glucose metabolic process;GO:0006090//pyruvate metabolic process;GO:0006544//glycine metabolic process;GO:0006568//tryptophan metabolic process;GO:0006633//fatty acid biosynthetic process;GO:0006732//coenzyme metabolic process;GO:0006753//nucleoside phosphate metabolic process;GO:0006873//cellular ion homeostasis;GO:0006970//response to osmotic stress;GO:0009404//toxin metabolic proce…
MSTRG.10454	BIP2	34.86	35.61	32.22	92.4	97.31	61.54	22.3	26.75	18.88	22.6433	83.75	34.23	-1.290827898	3.77E-05	0.000267834	-0.596174939	0.026568919	0.23052813	mediator of RNA polymerase II transcription subunit 37f [Brassica rapa]	ko04141//Protein processing in endoplasmic reticulum;ko03060//Protein export	GO:0005911//cell-cell junction;GO:0009536//plastid;GO:0030312//external encapsulating structure;GO:0031090//organelle membrane;GO:0043232//intracellular non-membrane-bounded organelle;GO:0043234//protein complex;GO:0044432//endoplasmic reticulum part	GO:0016628//oxidoreductase activity, acting on the CH-CH group of donors, NAD or NADP as acceptor;GO:0032550//purine ribonucleoside binding	GO:0000741//karyogamy;GO:0009725//response to hormone;GO:0010038//response to metal ion;GO:0010468//regulation of gene expression;GO:0022613//ribonucleoprotein complex biogenesis;GO:0033554//cellular response to stress;GO:0034645//cellular macromolecule biosynthetic process;GO:0043161//proteasome-mediated ubiquitin-dependent protein catabolic process;GO:0044710//single-organism metabolic process
MSTRG.10530	--	4.25	5.07	4.17	0.85	0.54	0.99	2.27	2.64	2.5	2.47	0.7933	4.4967	2.50285687	2.09E-23	7.48E-22	-0.864344901	0.031330883	0.257849194	protein transport protein SEC23 [Brassica napus]	ko04141//Protein processing in endoplasmic reticulum	GO:0030120//vesicle coat	GO:0046914//transition metal ion binding	GO:0015031//protein transport;GO:0016482//cytoplasmic transport
MSTRG.10614	RPL18AB	10.68	8.94	7.07	19.45	19.73	18.96	8.73	7.72	8.27	8.24	19.38	8.8967	-1.123231766	0.005513207	0.023436766	-0.110620562	0.292904784	0.842482263	Ribosomal protein L18ae/LX family protein [Arabidopsis thaliana]	ko03010//Ribosome	GO:0005911//cell-cell junction;GO:0015934//large ribosomal subunit;GO:0031090//organelle membrane	GO:0005198//structural molecule activity	GO:0010467//gene expression;GO:0022613//ribonucleoprotein complex biogenesis;GO:0044248//cellular catabolic process;GO:0071555//cell wall organization
MSTRG.10680	At1g67720	2.86	3.34	2.53	7.01	6.74	6.81	1.95	2.18	1.9	2.01	6.8533	2.91	-1.235786706	1.35E-05	0.00010398	-0.533823652	0.266735373	0.815764223	probable LRR receptor-like serine/threonine-protein kinase At1g67720 isoform X1 [Brassica rapa]	-	-	-	-
MSTRG.10685	PER21	20.35	29.6	23.23	62.28	102.12	92.72	5.3	8.56	3.22	5.6933	85.7067	24.3933	-1.812920513	2.35E-09	3.08E-08	-2.099141441	6.64E-11	7.11E-09	peroxidase 21 [Brassica rapa]	ko01100//Metabolic pathways;ko01110//Biosynthesis of secondary metabolites;ko00940//Phenylpropanoid biosynthesis	GO:0044444//cytoplasmic part	GO:0003824//catalytic activity;GO:0016209//antioxidant activity;GO:0043169//cation binding;GO:0046906//tetrapyrrole binding	GO:0006950//response to stress;GO:0009620//response to fungus;GO:0042743//hydrogen peroxide metabolic process;GO:0043436//oxoacid metabolic process;GO:0044272//sulfur compound biosynthetic process;GO:0044711//single-organism biosynthetic process;GO:0044765//single-organism transport;GO:1901576//organic substance biosynthetic process
MSTRG.10815	PI1	1.54	1.84	2.28	0	0	0.05	6.23	6.37	4.87	5.8233	0.0167	1.8867	6.822730148	1.82E-08	2.15E-07	1.62600565	6.20E-10	5.61E-08	protease inhibitor HPI [Brassica napus]	-	GO:0030312//external encapsulating structure	GO:0004866//endopeptidase inhibitor activity;GO:0016787//hydrolase activity	GO:0006812//cation transport;GO:0006950//response to stress;GO:0009620//response to fungus;GO:0010466//negative regulation of peptidase activity
MSTRG.10947	GLU2	6.79	8.75	6.68	13.25	16.4	15.04	3.48	6.67	3.76	4.6367	14.8967	7.4067	-1.008093228	0.003985173	0.017729967	-0.675736397	0.09405256	0.503118564	LOW QUALITY PROTEIN: ferredoxin-dependent glutamate synthase 2, chloroplastic-like [Brassica rapa]	ko00630//Glyoxylate and dicarboxylate metabolism;ko00910//Nitrogen metabolism	-	-	-
MSTRG.10949	--	30.76	29.9	25.07	39.36	38.85	38.15	6.79	14.29	9.23	10.1033	38.7867	28.5767	-0.440723153	0.1836799	0.397152282	-1.500006291	5.30E-06	0.000201016	transmembrane protein [Arabidopsis thaliana]	-	-	-	-
MSTRG.10986	--	0.04	0.03	0.06	1.36	1.27	0.77	0	0	0	0	1.1333	0.0433	-4.708951218	1.04E-05	8.22E-05	-5.437405312	0.42549798	0.941565935	BnaA09g17170D [Brassica napus]	ko04144//Endocytosis	GO:0036452//ESCRT complex	-	GO:0006305//DNA alkylation;GO:0006810//transport;GO:0007017//microtubule-based process;GO:0008104//protein localization;GO:0034968//histone lysine methylation;GO:1902410//mitotic cytokinetic process
MSTRG.11098	SPH11	2.93	4.73	4.34	11.16	10.75	11.13	0.84	1.31	1.18	1.11	11.0133	4	-1.461179281	1.69E-05	0.00012835	-1.849440323	3.05E-08	1.94E-06	PREDICTED: pentatricopeptide repeat-containing protein At1g10270-like [Brassica oleracea var. oleracea] [Brassica oleracea]	-	GO:0043231//intracellular membrane-bounded organelle	GO:0005488//binding	GO:0001101//response to acid chemical;GO:0009793//embryo development ending in seed dormancy;GO:0010467//gene expression;GO:0016070//RNA metabolic process;GO:0044763//single-organism cellular process
MSTRG.11142	--	1.99	1.14	0.92	22.39	38.65	24.12	0.11	0.25	0.12	0.16	28.3867	1.35	-4.394182137	6.39E-23	2.24E-21	-3.076815597	0.010951823	0.121945968	pollen coat protein B13 [Brassica oleracea]	-	-	-	-
MSTRG.11172	--	0.11	0.38	1.35	0	0	0	0	0	0.65	0.2167	0	0.6133	9.26052755	0.001436432	0.007243107	-1.501194143	0.444719741	0.953857138	unnamed protein product [Brassica napus]	-	-	-	-
MSTRG.1133	At4g18593	1.67	1.73	1.57	4.79	6.89	4.91	1.63	1.86	1.91	1.8	5.53	1.6567	-1.738996129	2.80E-07	2.82E-06	0.119713555	0.044474999	0.321897211	BnaCnng33340D [Brassica napus]	-	-	GO:0097159//organic cyclic compound binding	-
MSTRG.11440	--	0.27	0.28	0.12	0	0	0.03	0.17	0.19	0.18	0.18	0.01	0.2233	4.48112669	0.004571667	0.019957716	-0.311201688	0.960209099	0.992117361	PDDEXK-like [Arabidopsis suecica]	-	-	-	-
MSTRG.11476	--	0.31	0.42	0.61	0	0	0	0.22	0.25	0.16	0.21	0	0.4467	8.803054785	0.000394017	0.002270164	-1.088809267	0.460830503	0.962601289	Zinc knuckle CX2CX4HX4C [Arabidopsis suecica]	-	-	-	-
MSTRG.11644	--	1.12	0.42	0.65	12.36	24.36	15.14	0.27	0.5	0.19	0.32	17.2867	0.73	-4.565619431	2.81E-18	7.60E-17	-1.189824559	0.367997198	0.90778178	BnaCnng68060D [Brassica napus]	-	-	-	-
MSTRG.11668	--	0.94	1.26	0.89	3.16	1.52	3.9	0.37	0.26	0.21	0.28	2.86	1.03	-1.47337081	0.040582509	0.125323791	-1.879145605	0.003093705	0.046184937	flocculation FLO11-like protein [Arabidopsis thaliana]	-	-	-	-
MSTRG.11740	At4g01450	2.78	4.34	3.01	3.27	1.84	2.74	0.62	0.56	0.73	0.6367	2.6167	3.3767	0.367869615	0.000534758	0.002989916	-2.406989631	1.16E-10	1.19E-08	WAT1-related protein At4g01450 [Brassica rapa]	-	-	-	-
MSTRG.11742	At4g01450	3.09	3.44	3.05	1.06	0.92	1.25	0.98	2.26	1.68	1.64	1.0767	3.1933	1.568491491	5.78E-19	1.63E-17	-0.96136734	0.032508483	0.263862965	WAT1-related protein At4g01450 isoform X1 [Brassica rapa]	-	-	-	-
MSTRG.11978	LBD20	0.97	1.53	1.06	0.34	0.33	0.44	0.27	0.33	0.44	0.3467	0.37	1.1867	1.681317565	1.91E-07	1.97E-06	-1.775293713	0.003457094	0.050616621	LOB domain-containing protein 20 [Brassica napus]	-	GO:0043231//intracellular membrane-bounded organelle	-	GO:0001101//response to acid chemical;GO:0002831//regulation of response to biotic stimulus;GO:0009755//hormone-mediated signaling pathway;GO:0009791//post-embryonic development
MSTRG.12020	LCR18	11.69	9.79	5.84	91.54	98.83	76.78	0.1	0.23	0.33	0.22	89.05	9.1067	-3.289620628	1.04E-34	6.26E-33	-5.371347649	8.32E-13	1.16E-10	BnaC03g34050D [Brassica napus]	-	-	-	GO:0050896//response to stimulus;GO:0051704//multi-organism process
MSTRG.1209	--	0.45	0.08	0.47	0	0	0	1.52	1.33	1.62	1.49	0	0.3333	8.380821784	0.007697188	0.031270481	2.160274831	0.00100009	0.018397844	-	-	-	-	-
MSTRG.1214	ATTI7	1.23	0.55	1.17	2.85	4.57	5.29	0.63	0.69	0.41	0.5767	4.2367	0.9833	-2.107177171	0.002036645	0.00987507	-0.769942917	0.611756122	0.980399641	BnaA04g25120D [Brassica napus]	-	-	-	GO:0006950//response to stress;GO:0009620//response to fungus
MSTRG.1215	ATTI1	1.08	0.64	0.94	4.96	13.47	9.02	0.09	0	0.36	0.15	9.15	0.8867	-3.367307998	3.73E-08	4.23E-07	-2.563429339	0.050320676	0.34801086	BnaC04g48990D [Brassica napus]	-	-	-	GO:0006950//response to stress;GO:0009620//response to fungus
MSTRG.12221	MYBC1	42.29	37.09	24.3	74.82	96.89	94.58	12.56	16.28	13.95	14.2633	88.7633	34.56	-1.360860629	8.59E-05	0.000568424	-1.276792039	3.30E-06	0.000132321	PREDICTED: transcription factor LUX-like [Brassica oleracea var. oleracea] [Brassica oleracea]	-	-	GO:0005488//binding	GO:0010468//regulation of gene expression
MSTRG.12246	--	0.41	0.73	0.33	0.9	1.35	1.14	0.03	0	0.03	0.02	1.13	0.49	-1.205469118	0.233991081	0.471123246	-4.614709844	0.001035824	0.018906099	BnaC02g22580D [Brassica napus]	-	-	-	-
MSTRG.12266	UBP13	6.21	5.75	6.28	11.87	13.61	13.2	5.08	4.71	4.81	4.8667	12.8933	6.08	-1.084482065	0.000630044	0.003463924	-0.32113736	0.941590332	0.987389349	ubiquitin carboxyl-terminal hydrolase 13 isoform X1 [Brassica rapa]	-	GO:0005911//cell-cell junction;GO:0043231//intracellular membrane-bounded organelle;GO:0044444//cytoplasmic part	GO:0070011//peptidase activity, acting on L-amino acid peptides	GO:0006006//glucose metabolic process;GO:0009606//tropism;GO:0019941//modification-dependent protein catabolic process
MSTRG.12284	PRMT3	0	0	0	0.95	1.16	1.03	0	0	0	0	1.0467	0	-10.03158634	2.14E-05	0.000159086	0	1	1	probable protein arginine N-methyltransferase 3 [Brassica napus]	-	-	-	GO:0032259//methylation;GO:0044237//cellular metabolic process;GO:0044238//primary metabolic process;GO:0044699//single-organism process;GO:0071704//organic substance metabolic process
MSTRG.12448	--	0	0	0	0.58	2.16	3.87	0	0	0	0	2.2033	0	-11.10547206	3.71E-05	0.000263711	0	1	1	PREDICTED: defensin-like protein 54 [Camelina sativa]	-	GO:0005911//cell-cell junction	-	-
MSTRG.12494	--	0.72	1.83	1.1	1.67	1.48	1.74	0.26	0.14	0	0.1333	1.63	1.2167	-0.421938001	0.612735436	0.846472087	-3.189824559	0.000667869	0.013267175	hypothetical protein F2Q69_00046758 [Brassica cretica]	-	-	-	-
MSTRG.12496	--	1.51	1.57	1.81	1.33	2.81	3.17	0.22	0.66	0.43	0.4367	2.4367	1.63	-0.580036941	0.912195565	0.985790936	-1.900267653	0.000891018	0.016833602	01P13-2 [Brassica rapa subsp. pekinensis] [Brassica rapa]	-	-	-	-
MSTRG.12510	--	9.17	11.25	9.56	13.97	14.68	14.99	1.65	1.81	1.69	1.7167	14.5467	9.9933	-0.541650718	0.453292134	0.721226662	-2.541356046	4.60E-36	8.09E-33	hypothetical protein F2Q69_00046758 [Brassica cretica]	-	-	-	-
MSTRG.12519	--	0.68	1.11	0.98	0.55	0.27	0.18	0.4	0.42	0.47	0.43	0.3333	0.9233	1.469885976	0.000705495	0.003833693	-1.102514911	0.152613636	0.640967855	BnaC03g30900D [Brassica napus]	-	-	-	-
MSTRG.12525	HDA15	0.74	0.78	0.45	2.09	3.12	2.62	0.38	0.61	0.14	0.3767	2.61	0.6567	-1.990816678	0.000110767	0.000717126	-0.801872857	0.435207745	0.947512717	histone deacetylase 15 [Brassica rapa]	-	GO:0043231//intracellular membrane-bounded organelle	GO:0017136//NAD-dependent histone deacetylase activity	GO:0009292//genetic transfer;GO:0009648//photoperiodism;GO:0016570//histone modification
MSTRG.12863	--	0.08	0.14	0.14	2.93	9.49	10.1	0	0	0.08	0.0267	7.5067	0.12	-5.967066111	1.83E-10	2.69E-09	-2.169925001	0.459156325	0.961787752	PREDICTED: leucine-rich repeat extensin-like protein 5 [Raphanus sativus]	-	-	-	-
MSTRG.12867	--	7.1	3.99	3.71	6.65	4.88	5.9	0.91	2.05	0.69	1.2167	5.81	4.9333	-0.235975394	0.906693772	0.982641696	-2.019628807	7.95E-08	4.62E-06	BnaUnng01880D [Brassica napus]	-	-	-	-
MSTRG.12868	--	2.41	1.81	1.17	7.54	6.43	9.21	0.32	0.36	0.27	0.3167	7.7267	1.7967	-2.104523388	6.68E-08	7.35E-07	-2.504285854	2.47E-06	0.000101641	hypothetical protein Bca52824_053923 [Brassica carinata]	-	-	-	-
MSTRG.12893	--	0.16	0.46	0.18	1.05	1.08	1.72	0.08	0	0.04	0.04	1.2833	0.2667	-2.266786541	0.007902436	0.031999513	-2.736965594	0.073858467	0.437994239	hypothetical protein F2Q69_00045349 [Brassica cretica]	-	-	-	-
MSTRG.12930	--	15.9	14.24	18.53	6.71	6.15	7.65	17.2	11.07	16.46	14.91	6.8367	16.2233	1.246705283	7.83E-21	2.48E-19	-0.121790016	0.327911974	0.873071011	PREDICTED: 30S ribosomal protein S17 [Brassica oleracea var. oleracea] [Brassica oleracea]	ko03010//Ribosome	GO:0005622//intracellular	-	-
MSTRG.13032	GAD4	0.48	0.71	0.9	10.23	9.98	9.97	0	0.04	0.13	0.0567	10.06	0.6967	-3.852017958	1.22E-33	7.06E-32	-3.619896291	0.000599697	0.012129144	glutamate decarboxylase 4 [Brassica rapa]	ko01100//Metabolic pathways;ko01110//Biosynthesis of secondary metabolites;ko00250//Alanine, aspartate and glutamate metabolism;ko00410//beta-Alanine metabolism;ko00650//Butanoate metabolism;ko00430//Taurine and hypotaurine metabolism	GO:0043231//intracellular membrane-bounded organelle;GO:0044444//cytoplasmic part	GO:0005515//protein binding;GO:0016705//oxidoreductase activity, acting on paired donors, with incorporation or reduction of molecular oxygen;GO:0016831//carboxy-lyase activity;GO:0043168//anion binding;GO:0043169//cation binding	GO:0006605//protein targeting;GO:0006873//cellular ion homeostasis;GO:0006970//response to osmotic stress;GO:0009064//glutamine family amino acid metabolic process;GO:0009746//response to hexose;GO:0009891//positive regulation of biosynthetic process;GO:0010038//response to metal ion;GO:0030001//metal ion transport;GO:0042044//fluid transport;GO:0043067//regulation of programmed cell death
MSTRG.13033	GAD4	0.21	0.46	0.1	5.05	5.43	3.41	0	0	0.11	0.0367	4.63	0.2567	-4.173044343	6.83E-07	6.51E-06	-2.807354922	0.25854507	0.804839399	Glutamate decarboxylase [Morella rubra]	ko01100//Metabolic pathways;ko01110//Biosynthesis of secondary metabolites;ko00250//Alanine, aspartate and glutamate metabolism;ko00410//beta-Alanine metabolism;ko00650//Butanoate metabolism;ko00430//Taurine and hypotaurine metabolism	GO:0043231//intracellular membrane-bounded organelle;GO:0044444//cytoplasmic part	GO:0005515//protein binding;GO:0016705//oxidoreductase activity, acting on paired donors, with incorporation or reduction of molecular oxygen;GO:0016831//carboxy-lyase activity;GO:0043168//anion binding;GO:0043169//cation binding	GO:0001101//response to acid chemical;GO:0006605//protein targeting;GO:0006873//cellular ion homeostasis;GO:0006970//response to osmotic stress;GO:0009064//glutamine family amino acid metabolic process;GO:0009746//response to hexose;GO:0009891//positive regulation of biosynthetic process;GO:0010038//response to metal ion;GO:0015698//inorganic anion transport;GO:0030001//metal ion transport;GO:003…
MSTRG.13034	NPF8.4	1.05	1.43	1.07	1.19	0.8	1.07	0.18	0.23	0.19	0.2	1.02	1.1833	0.214287372	0.019352636	0.068210897	-2.564784619	2.96E-05	0.000915111	LOW QUALITY PROTEIN: protein NRT1/ PTR FAMILY 8.4 [Brassica rapa]	-	GO:0016020//membrane	-	GO:0006810//transport
MSTRG.13041	--	1.05	0.93	0.91	4.26	24.75	13.75	0.88	0.62	0.35	0.6167	14.2533	0.9633	-3.887120455	1.11E-07	1.18E-06	-0.643544222	0.715716213	0.980399641	PREDICTED: defensin-like protein 10 [Camelina sativa]	-	-	-	-
MSTRG.13042	--	0.68	1.2	1.43	0.31	0.44	0.64	1.06	1.34	1.56	1.32	0.4633	1.1033	1.251746334	0.001135007	0.005869142	0.258669213	0.222971243	0.761379773	hypothetical protein IGI04_007901 [Brassica rapa subsp. trilocularis] [Brassica rapa]	-	-	-	-
MSTRG.13074	--	1.77	1.6	1.44	0.59	0.54	0.83	1.75	1.12	1.1	1.3233	0.6533	1.6033	1.29518324	7.42E-07	7.03E-06	-0.276897887	0.862590806	0.980399641	BnaA09g03960D [Brassica napus]	-	-	-	-
MSTRG.13109	CCT1	6.02	5.93	5.7	12.7	13.12	13.18	4.45	4.61	4.79	4.6167	13	5.8833	-1.14380594	7.41E-08	8.08E-07	-0.349782207	0.882738195	0.980399641	T-complex protein 1 subunit alpha [Brassica rapa]	-	GO:0044444//cytoplasmic part	GO:0005515//protein binding;GO:0032550//purine ribonucleoside binding	GO:0000338//protein deneddylation;GO:0006006//glucose metabolic process;GO:0006221//pyrimidine nucleotide biosynthetic process;GO:0009451//RNA modification;GO:0009639//response to red or far red light;GO:0016571//histone methylation;GO:0048580//regulation of post-embryonic development;GO:0051603//proteolysis involved in cellular protein catabolic process
MSTRG.1314	--	0.19	0.06	0.08	0	0	0	0.72	0.2	0.51	0.4767	0	0.11	6.781359714	0.008419212	0.033711957	2.115477217	0.003327701	0.049058009	hypothetical protein IGI04_001030 [Brassica rapa subsp. trilocularis] [Brassica rapa]	-	-	-	-
MSTRG.13151	GK-2	9.21	10.22	9.75	3.26	3.84	3.12	9.03	9.03	9.08	9.0467	3.4067	9.7267	1.513584687	5.61E-56	6.42E-54	-0.104559162	0.037056821	0.286329081	PREDICTED: guanylate kinase 2 [Brassica oleracea var. oleracea] [Brassica oleracea]	ko01100//Metabolic pathways;ko00230//Purine metabolism	GO:0044424//intracellular part	GO:0016776//phosphotransferase activity, phosphate group as acceptor;GO:0032550//purine ribonucleoside binding	GO:0007165//signal transduction;GO:0007275//multicellular organism development;GO:0009117//nucleotide metabolic process;GO:0009620//response to fungus;GO:0010243//response to organonitrogen compound;GO:0040008//regulation of growth
MSTRG.13220	ICL	5.5	3	6.01	0.09	0.09	0.04	22.78	15.33	23.9	20.67	0.0733	4.8367	6.043400185	2.03E-41	1.62E-39	2.09545337	1.14E-10	1.18E-08	isocitrate lyase [Brassica rapa]	ko01100//Metabolic pathways;ko01110//Biosynthesis of secondary metabolites;ko01200//Carbon metabolism;ko00630//Glyoxylate and dicarboxylate metabolism	GO:0005777//peroxisome	GO:0016833//oxo-acid-lyase activity	GO:0003006//developmental process involved in reproduction;GO:0006101//citrate metabolic process;GO:0044262//cellular carbohydrate metabolic process
MSTRG.13269	--	4.09	5.21	3.65	12.25	12.56	11.43	1.73	2.09	1.42	1.7467	12.08	4.3167	-1.484630857	1.17E-06	1.08E-05	-1.305313381	0.000300489	0.006781322	BnaA09g05740D [Brassica napus]	-	-	-	-
MSTRG.13327	--	2.7	2.75	2.71	0.67	1.17	0.8	2.5	3.68	2.97	3.05	0.88	2.72	1.628031223	2.76E-13	5.24E-12	0.165202591	0.036632788	0.28427417	PREDICTED: ABC transporter B family member 1-like [Raphanus sativus]	ko02010//ABC transporters	GO:0005911//cell-cell junction;GO:0016020//membrane	GO:0005515//protein binding;GO:0015562//efflux transmembrane transporter activity;GO:0080161//auxin transmembrane transporter activity	GO:0000904//cell morphogenesis involved in differentiation;GO:0007015//actin filament organization;GO:0009409//response to cold;GO:0009630//gravitropism;GO:0009639//response to red or far red light;GO:0010053//root epidermal cell differentiation;GO:0010928//regulation of auxin mediated signaling pathway;GO:0022610//biological adhesion;GO:0032535//regulation of cellular component size;GO:0043479//…
MSTRG.13328	--	1.24	1.32	1.43	0.27	0.36	0	2.84	2.26	2.94	2.68	0.21	1.33	2.662965013	9.30E-06	7.40E-05	1.010806755	6.44E-05	0.001812506	PREDICTED: ABC transporter B family member 1-like [Raphanus sativus]	ko02010//ABC transporters	GO:0005911//cell-cell junction;GO:0016020//membrane	GO:0005515//protein binding;GO:0015562//efflux transmembrane transporter activity;GO:0080161//auxin transmembrane transporter activity	GO:0000904//cell morphogenesis involved in differentiation;GO:0007015//actin filament organization;GO:0009409//response to cold;GO:0009630//gravitropism;GO:0009639//response to red or far red light;GO:0010053//root epidermal cell differentiation;GO:0010928//regulation of auxin mediated signaling pathway;GO:0022610//biological adhesion;GO:0032535//regulation of cellular component size;GO:0043479//…
MSTRG.13348	SMC1	0.04	0.15	0.07	0.46	0.55	0.76	0.02	0.04	0.08	0.0467	0.59	0.0867	-2.767165832	0.000151145	0.000955006	-0.893084796	0.622205436	0.980399641	structural maintenance of chromosomes protein 1 [Brassica rapa]	-	GO:0043231//intracellular membrane-bounded organelle;GO:0043232//intracellular non-membrane-bounded organelle;GO:0043234//protein complex	GO:0032550//purine ribonucleoside binding;GO:0046983//protein dimerization activity	GO:0000280//nuclear division;GO:0006259//DNA metabolic process;GO:0007062//sister chromatid cohesion;GO:0033554//cellular response to stress
MSTRG.13395	--	0.23	0.3	0.78	3.92	10.78	5.37	0.43	0.48	0.11	0.34	6.69	0.4367	-3.9374019	1.77E-06	1.59E-05	-0.36099766	0.961966363	0.992381743	BnaC03g66980D [Brassica napus]	-	-	-	-
MSTRG.13579	--	0.25	0.11	0.11	4.14	17	21.31	0	0	0	0	14.15	0.1567	-6.496959987	1.96E-10	2.86E-09	-7.291554446	0.41766364	0.937030762	hypothetical protein HID58_011912 [Brassica napus]	-	-	-	-
MSTRG.13677	PUB51	0.73	0.61	0.78	0.23	0.28	0.33	0.34	0.35	0.48	0.39	0.28	0.7067	1.335603032	1.76E-05	0.000133174	-0.857555735	0.244655292	0.788401255	U-box domain-containing protein 51 [Brassica rapa]	-	GO:0009536//plastid;GO:0016020//membrane	GO:0004672//protein kinase activity	GO:0002252//immune effector process;GO:0006498//N-terminal protein lipidation;GO:0007165//signal transduction;GO:0009617//response to bacterium;GO:0010243//response to organonitrogen compound;GO:0016310//phosphorylation;GO:0046942//carboxylic acid transport
MSTRG.13709	--	9.5	9.14	7.74	2.93	2.61	2.45	6.96	8.43	6.26	7.2167	2.6633	8.7933	1.723177156	5.47E-31	2.86E-29	-0.28507754	0.80665537	0.980399641	unnamed protein product, partial [Brassica rapa]	-	-	-	-
MSTRG.13840	--	1.46	0.94	1.24	0.16	0.06	0.21	1.11	1.39	1.39	1.2967	0.1433	1.2133	3.081529885	6.60E-15	1.42E-13	0.095831705	0.137809847	0.610195459	BnaC06g03170D [Brassica napus]	-	-	-	-
MSTRG.13929	--	0.38	0.29	0.08	1.31	2.63	1.25	0.09	0	0.05	0.0467	1.73	0.25	-2.790772038	0.000936344	0.004942504	-2.421463768	0.139662663	0.614806229	BnaC02g11740D [Brassica napus]	-	-	-	-
MSTRG.13940	XCP2	1.24	1.17	0.86	0.22	0.6	0.74	1.57	1.16	1.02	1.25	0.52	1.09	1.067744607	0.000789123	0.004241776	0.19759996	0.140609725	0.616122428	cysteine protease XCP2-like [Brassica napus]	-	GO:0005773//vacuole;GO:0071944//cell periphery	GO:0016787//hydrolase activity	GO:0012501//programmed cell death;GO:0045491//xylan metabolic process
MSTRG.13975	ABCB21	0	0	0	0.45	0.2	0.33	0	0.14	0	0.0467	0.3267	0	-8.351675438	0.00545227	0.023213689	5.544320516	0.459457596	0.961787752	BnaC06g18370D [Brassica napus]	ko02010//ABC transporters	-	GO:0017111//nucleoside-triphosphatase activity	GO:0006810//transport
MSTRG.14003	At4g09580	5.65	5.44	5.07	0.55	0.58	0.24	5.84	7.47	5.97	6.4267	0.4567	5.3867	3.5601794	3.16E-35	1.96E-33	0.254677853	0.002626289	0.040427475	uncharacterized membrane protein At4g09580 [Brassica rapa]	-	GO:0043231//intracellular membrane-bounded organelle	-	GO:0046474//glycerophospholipid biosynthetic process
MSTRG.14079	--	0.32	0.29	0.32	1.78	1.2	1.28	0	0.3	0.17	0.1567	1.42	0.31	-2.195550809	0.002889945	0.013376408	-0.984569959	0.515168914	0.980399641	ABC transporter F family member 4-like [Brassica rapa]	-	-	-	-
MSTRG.14128	--	0.87	0.99	1.24	0.06	0.14	0.05	0.82	0.73	1.69	1.08	0.0833	1.0333	3.632268215	1.67E-06	1.50E-05	0.063725598	0.491934661	0.975577214	unnamed protein product [Brassica napus]	-	-	-	-
MSTRG.14129	--	0.1	0.18	0.09	0	0	0	0.1	0.14	0.1	0.1133	0	0.1233	6.94641896	0.005470388	0.023282522	-0.121990524	0.842651033	0.980399641	hypothetical protein F2Q68_00020081 [Brassica cretica]	-	-	-	-
MSTRG.14148	TPS07	4.5	4.56	3.37	0.08	0.09	0.11	7.03	4.73	4.24	5.3333	0.0933	4.1433	5.472255659	1.76E-52	1.86E-50	0.364245609	0.001608004	0.027133398	Terpenoid cyclases/protein prenyltransferase alpha-alpha toroid [Arabidopsis suecica]	-	GO:0005911//cell-cell junction;GO:0009536//plastid	-	GO:0006714//sesquiterpenoid metabolic process;GO:0046246//terpene biosynthetic process
MSTRG.14150	TPS07	3.66	3.85	3.12	0	0.02	0.13	3.72	4.12	3.12	3.6533	0.05	3.5433	6.147035286	9.64E-34	5.63E-32	0.044106201	0.050721635	0.34944705	Terpenoid cyclases/protein prenyltransferase alpha-alpha toroid [Arabidopsis suecica]	-	GO:0009536//plastid	GO:0016829//lyase activity	GO:0046246//terpene biosynthetic process
MSTRG.14261	--	0.26	0.95	0.81	2.69	2.78	2.61	0.29	0.52	0.61	0.4733	2.6933	0.6733	-2	0.002716934	0.012681199	-0.508464363	0.80177934	0.980399641	BnaAnng38260D, partial [Brassica napus]	-	-	-	-
MSTRG.14314	--	0.35	0	0.18	8.46	9.86	7.78	0	0.05	0.1	0.05	8.7	0.1767	-5.621913637	8.69E-22	2.88E-20	-1.821029859	0.431047031	0.943948018	BnaA03g45780D [Brassica napus]	-	-	-	-
MSTRG.14317	--	0	0	0.09	3.26	4.92	2	0	0.06	0.11	0.0567	3.3933	0.03	-6.821596845	1.24E-07	1.32E-06	0.91753784	0.686189029	0.980399641	BnaA03g45780D [Brassica napus]	-	-	-	-
MSTRG.14393	--	10.38	9.3	7.87	2.69	1.22	1.86	6.94	7.09	5.83	6.62	1.9233	9.1833	2.255409095	1.26E-28	5.96E-27	-0.472186696	0.37611064	0.912533381	hypothetical protein IGI04_013130, partial [Brassica rapa subsp. trilocularis] [Brassica rapa]	-	-	-	-
MSTRG.14793	At2g25060	0.1	0	0	1.62	1.57	1.34	0	0	0	0	1.51	0.0333	-5.501439145	7.52E-09	9.31E-08	-5.058893689	0.531414222	0.980399641	early nodulin-like protein 2 [Brassica rapa]	-	GO:0031224//intrinsic component of membrane	GO:0046914//transition metal ion binding	-
MSTRG.14866	SCT	2.95	1.76	2.27	0	0	0	3.19	4.05	4.21	3.8167	0	2.3267	11.18404882	7.24E-15	1.55E-13	0.714048657	7.37E-05	0.002046005	BnaA03g49740D [Brassica napus]	-	-	GO:0016410//N-acyltransferase activity	GO:0044710//single-organism metabolic process;GO:0044763//single-organism cellular process;GO:0045491//xylan metabolic process;GO:0050896//response to stimulus
MSTRG.14893	VLN4	1.5	1.37	1.44	4.2	3.6	3.81	1.08	0.75	1.01	0.9467	3.87	1.4367	-1.429608198	1.78E-06	1.60E-05	-0.60179694	0.269019462	0.817837834	villin-4 [Brassica rapa]	-	GO:0043232//intracellular non-membrane-bounded organelle;GO:0044444//cytoplasmic part	GO:0003779//actin binding	GO:0001101//response to acid chemical;GO:0022607//cellular component assembly;GO:0030835//negative regulation of actin filament depolymerization;GO:0046907//intracellular transport;GO:0048588//developmental cell growth
MSTRG.1492	--	0.38	0.3	0.23	3.74	2.01	2.61	0.07	0.08	0.04	0.0633	2.7867	0.3033	-3.199564492	8.24E-08	8.95E-07	-2.259867127	0.076409117	0.447295216	BnaCnng11820D [Brassica napus]	-	-	-	-
MSTRG.14983	--	7	6.69	5.31	1.75	1.66	1.49	3.38	3.62	2.52	3.1733	1.6333	6.3333	1.955145764	3.09E-69	4.69E-67	-0.99696594	3.98E-05	0.001186456	BnaC01g21130D [Brassica napus]	-	-	-	-
MSTRG.1512	SD18	2.71	2.19	2.25	4.53	5.65	4.82	2.08	1.77	1.76	1.87	5	2.3833	-1.068947354	0.009974729	0.038931323	-0.349942471	0.96194928	0.992379823	Protein kinase domain [Arabidopsis suecica]	-	-	-	-
MSTRG.15146	--	35.68	40.83	42.56	115.7	100.7	103.71	9.53	14.96	9.94	11.4767	106.7033	39.69	-1.426757778	7.71E-10	1.06E-08	-1.790071882	2.02E-13	3.09E-11	transmembrane protein [Arabidopsis thaliana]	-	-	-	-
MSTRG.15147	--	0.07	0.12	0.18	2.27	3.71	2	0	0	0	0	2.66	0.1233	-4.430791571	2.19E-06	1.93E-05	-6.94641896	0.254861774	0.801669909	transmembrane protein [Arabidopsis thaliana]	-	-	-	-
MSTRG.15279	GSTT3	1.75	1.66	2.28	0.11	0	0.37	1.3	0.67	0.5	0.8233	0.16	1.8967	3.567322342	1.58E-05	0.000120429	-1.203917611	0.216630779	0.752025883	PREDICTED: glutathione S-transferase T3-like [Brassica oleracea var. oleracea] [Brassica oleracea]	-	-	-	-
MSTRG.15341	MAP70.1	0.93	0.67	0.86	0.43	0.44	0.26	0.77	1.05	0.99	0.9367	0.3767	0.82	1.122335543	0.005712125	0.024177123	0.191911815	0.332164335	0.8753957	microtubule-associated protein 70-1 [Brassica rapa]	-	GO:0016020//membrane;GO:0055028//cortical microtubule	GO:0015631//tubulin binding	GO:0003002//regionalization;GO:0003006//developmental process involved in reproduction;GO:0006281//DNA repair;GO:0006310//DNA recombination;GO:0006342//chromatin silencing;GO:0007015//actin filament organization;GO:0007059//chromosome segregation;GO:0034968//histone lysine methylation;GO:0042546//cell wall biogenesis;GO:0043623//cellular protein complex assembly;GO:0045229//external encapsulating…
MSTRG.15371	--	0.89	0.61	1.16	0.16	0.21	0.15	1	0.98	1.07	1.0167	0.1733	0.8867	2.354842717	5.27E-07	5.11E-06	0.197382997	0.223407329	0.761892656	unnamed protein product [Brassica napus]	-	-	-	-
MSTRG.15506	AGP20	0.27	0.08	0	1.01	1.6	1.21	1.56	0.2	0.65	0.8033	1.2733	0.1167	-3.448145811	0.009207681	0.036356808	2.783606319	0.01421435	0.14790476	arabinogalactan protein 20 [Brassica rapa]	-	GO:0031224//intrinsic component of membrane	-	GO:0000041//transition metal ion transport;GO:0001101//response to acid chemical;GO:0009267//cellular response to starvation;GO:0010053//root epidermal cell differentiation;GO:0015698//inorganic anion transport;GO:0016129//phytosteroid biosynthetic process
MSTRG.15529	LCR30	32.45	25.1	27.06	25.1	19.61	23.74	11.41	12.62	12.75	12.26	22.8167	28.2033	0.305777643	1.25E-07	1.32E-06	-1.201906705	3.27E-06	0.000131387	defensin-like protein 122 [Eutrema salsugineum]	-	-	-	-
MSTRG.15544	--	3.02	3.45	3.17	10.82	10.12	11.26	8.34	3.48	3.92	5.2467	10.7333	3.2133	-1.739955637	0.000277053	0.001650801	0.707330489	0.020606224	0.193904618	expressed protein [Arabidopsis lyrata subsp. lyrata] [Arabidopsis lyrata]	-	-	-	-
MSTRG.15557	LCR62	0.56	0.33	0.24	5.56	10.93	7.13	0	0	0	0	7.8733	0.3767	-4.385614287	4.48E-11	6.98E-10	-8.557144557	0.037641041	0.289570677	low-molecular-weight cysteine-rich 63 [Arabidopsis thaliana]	-	-	-	-
MSTRG.15618	TET15	0.35	0.32	0.19	0.04	0	0	0.96	0.39	0.44	0.5967	0.0133	0.2867	4.426264755	3.08E-06	2.66E-05	1.057551023	0.005462553	0.072512434	Tetraspanin/Peripherin [Arabidopsis suecica]	-	-	-	-
MSTRG.1567	CSC1	3.37	4.35	3.44	19.14	17.38	15.59	2.04	2.93	1.89	2.2867	17.37	3.72	-2.223223228	1.45E-25	5.88E-24	-0.702056546	0.098444134	0.514981603	calcium permeable stress-gated cation channel 1-like [Brassica napus]	-	GO:0031224//intrinsic component of membrane	GO:0005261//cation channel activity	GO:0006811//ion transport
MSTRG.15809	ADPG2	6.77	7.38	6.66	0.5	0.65	0.67	4.97	5.88	4.62	5.1567	0.6067	6.9367	3.51526661	4.05E-98	1.07E-95	-0.427803768	0.485453286	0.972490016	PREDICTED: polygalacturonase ADPG1-like [Raphanus sativus]	ko01100//Metabolic pathways;ko00040//Pentose and glucuronate interconversions	GO:0030312//external encapsulating structure;GO:0044424//intracellular part	GO:0004553//hydrolase activity, hydrolyzing O-glycosyl compounds	GO:0000904//cell morphogenesis involved in differentiation;GO:0003006//developmental process involved in reproduction;GO:0007275//multicellular organism development;GO:0009827//plant-type cell wall modification;GO:0009900//dehiscence;GO:0044238//primary metabolic process
MSTRG.15812	--	0.08	0.07	0	1.1	0.97	0.76	0	0	0	0	0.9433	0.05	-4.237767647	0.005930371	0.024980638	-5.64385619	0.727804415	0.980399641	unnamed protein product [Brassica rapa]	-	-	-	-
MSTRG.15884	FIPS5	2.26	1.76	1.46	5.73	5.82	5.65	0.52	0.55	0.52	0.53	5.7333	1.8267	-1.650160767	5.67E-06	4.69E-05	-1.785149128	0.000201074	0.004807922	BnaC05g49170D [Brassica napus]	-	-	-	-
MSTRG.15891	WLIM2B	0.42	0.67	0.22	0.08	0.13	0	0.12	0.18	0.04	0.1133	0.07	0.4367	2.641105579	0.002009083	0.009755584	-1.94596016	0.099759252	0.518706155	LIM domain-containing protein WLIM2b [Brassica rapa]	-	-	GO:0043169//cation binding	-
MSTRG.15894	--	1.82	1.79	2.05	0.35	0.15	0.21	2.95	1.79	3.24	2.66	0.2367	1.8867	2.994911123	4.20E-12	7.20E-11	0.495586693	0.018470277	0.178918369	hypothetical protein F2Q68_00014014 [Brassica cretica]	-	-	-	-
MSTRG.15929	--	0.6	0	0	2.75	1.37	2.47	0	0	0.24	0.08	2.1967	0.2	-3.457244059	0.012215721	0.046280804	-1.321928095	0.746503747	0.980399641	bidirectional sugar transporter SWEET13 isoform X2 [Brassica napus]	-	-	-	-
MSTRG.15990	--	4.75	3.48	2.39	1.12	0.79	0.58	2.74	1.98	2.41	2.3767	0.83	3.54	2.092566119	2.74E-16	6.52E-15	-0.574809784	0.392242014	0.921931279	-	-	-	-	-
MSTRG.16068	--	0.98	1.4	2	0.23	0.13	0.05	0.78	0.69	1.46	0.9767	0.1367	1.46	3.417235055	2.19E-10	3.18E-09	-0.580030205	0.616464654	0.980399641	BnaC08g19560D [Brassica napus]	-	-	-	-
MSTRG.16089	RPS14A	0.16	0.05	0.05	0.83	1.3	0.71	0	0	0.05	0.0167	0.9467	0.0867	-3.449307401	0.002569146	0.012081869	-2.378511623	0.450966593	0.958068841	40S ribosomal protein S14, partial [Mucuna pruriens]	ko03010//Ribosome	GO:0005911//cell-cell junction;GO:0009536//plastid;GO:0015935//small ribosomal subunit;GO:0031090//organelle membrane	GO:0005198//structural molecule activity;GO:0005488//binding	GO:0009451//RNA modification;GO:0010467//gene expression;GO:0071555//cell wall organization
MSTRG.16185	--	1.28	0.95	1.49	4.07	4.15	5.11	0.4	0.96	1.03	0.7967	4.4433	1.24	-1.841302254	0.000130681	0.00083537	-0.638292003	0.535774019	0.980399641	BnaCnng73940D [Brassica napus]	-	-	-	-
MSTRG.16361	IBS1	2.6	2.67	2.1	7.49	5.59	6.18	1.57	2.27	1.05	1.63	6.42	2.4567	-1.385871179	2.69E-05	0.000196638	-0.591830154	0.319232012	0.866195873	LOW QUALITY PROTEIN: protein IMPAIRED IN BABA-INDUCED STERILITY 1 [Brassica rapa]	-	-	GO:0004674//protein serine/threonine kinase activity;GO:0036094//small molecule binding;GO:0097159//organic cyclic compound binding;GO:1901363//heterocyclic compound binding	GO:0006796//phosphate-containing compound metabolic process;GO:0044238//primary metabolic process;GO:0044260//cellular macromolecule metabolic process
MSTRG.16463	BHLH71	5.1	7.33	5.18	0.28	0.17	0.47	2.8	4.42	1.78	3	0.3067	5.87	4.258617238	1.88E-51	1.93E-49	-0.968398003	0.022332631	0.20427774	PREDICTED: transcription factor bHLH71 [Brassica oleracea var. oleracea] [Brassica oleracea]	-	GO:0043231//intracellular membrane-bounded organelle	GO:0001071//nucleic acid binding transcription factor activity;GO:0003676//nucleic acid binding;GO:0005515//protein binding	GO:0010468//regulation of gene expression;GO:0034645//cellular macromolecule biosynthetic process;GO:0044707//single-multicellular organism process
MSTRG.16531	--	1.39	1.78	1.68	3.85	5.69	5.21	0.91	1.64	1.09	1.2133	4.9167	1.6167	-1.604658302	0.000619881	0.003416235	-0.414046297	0.813696154	0.980399641	hypothetical protein IGI04_015678, partial [Brassica rapa subsp. trilocularis] [Brassica rapa]	-	-	-	-
MSTRG.16545	RLM1B	0.48	0.31	0.59	2.87	3.72	3.87	0.64	0.24	0.2	0.36	3.4867	0.46	-2.922142679	2.24E-11	3.57E-10	-0.353636955	0.99110825	0.998223821	PREDICTED: disease resistance protein ADR2-like [Raphanus sativus]	-	GO:0043231//intracellular membrane-bounded organelle	GO:0032550//purine ribonucleoside binding	GO:0006950//response to stress;GO:0009620//response to fungus;GO:0050794//regulation of cellular process
MSTRG.16565	TPS09	0.64	0.38	0.68	0	0	0.02	2.54	1.56	2	2.0333	0.0067	0.5667	6.409390936	2.91E-08	3.34E-07	1.843274496	3.32E-10	3.10E-08	BnaA08g30440D [Brassica napus]	-	GO:0005911//cell-cell junction;GO:0009536//plastid	GO:0016838//carbon-oxygen lyase activity, acting on phosphates	GO:0006714//sesquiterpenoid metabolic process;GO:0009664//plant-type cell wall organization;GO:0046246//terpene biosynthetic process
MSTRG.16635	--	3.83	4.03	4.31	1.19	0.67	0.43	4.98	4.53	3.8	4.4367	0.7633	4.0567	2.409909665	7.46E-14	1.48E-12	0.129181403	0.081708036	0.465100952	hypothetical protein HID58_061944 [Brassica napus]	-	-	-	-
MSTRG.16675	MIPS	7.54	9.38	10.03	2.59	2.06	2.54	10.61	11.73	10.12	10.82	2.3967	8.9833	1.906221597	5.40E-40	4.08E-38	0.268377727	8.42E-05	0.002284843	inositol-3-phosphate synthase [Brassica rapa]	ko01100//Metabolic pathways;ko00562//Inositol phosphate metabolism	GO:0043231//intracellular membrane-bounded organelle	GO:0005488//binding;GO:0016872//intramolecular lyase activity	GO:0000302//response to reactive oxygen species;GO:0002252//immune effector process;GO:0003006//developmental process involved in reproduction;GO:0006020//inositol metabolic process;GO:0006658//phosphatidylserine metabolic process;GO:0006787//porphyrin-containing compound catabolic process;GO:0009267//cellular response to starvation;GO:0009617//response to bacterium;GO:0009620//response to fungus…
MSTRG.1674	--	1.36	0.61	0.62	3.07	2.96	3.12	1.55	0.79	1.09	1.1433	3.05	0.8633	-1.820819645	0.001109586	0.005756576	0.405256478	0.10764774	0.541012891	PREDICTED: ATP synthase subunit delta', mitochondrial-like [Raphanus sativus]	ko01100//Metabolic pathways;ko00190//Oxidative phosphorylation	-	-	-
MSTRG.16750	PAB4	15.05	14.05	12.23	31.86	27.09	29.37	12.01	11.47	11.34	11.6067	29.44	13.7767	-1.095550808	2.01E-05	0.00015042	-0.247273161	0.424280807	0.941230181	polyadenylate-binding protein 4 [Brassica rapa]	ko03013//Nucleocytoplasmic transport;ko03015//mRNA surveillance pathway;ko03018//RNA degradation	GO:0044444//cytoplasmic part	GO:0008135//translation factor activity, RNA binding	GO:0009987//cellular process;GO:0010038//response to metal ion;GO:0010467//gene expression;GO:0044403//symbiosis, encompassing mutualism through parasitism;GO:0065007//biological regulation
MSTRG.16842	--	2.65	2.78	2.02	0.14	0.26	0.05	2.18	2.25	1.11	1.8467	0.15	2.4833	4.049243519	1.15E-19	3.38E-18	-0.427354449	0.803025624	0.980399641	unnamed protein product [Brassica napus]	-	-	-	-
MSTRG.16843	--	2.99	3.02	2.7	0.46	0.34	0.39	3.98	3.76	2.86	3.5333	0.3967	2.9033	2.871711145	4.28E-18	1.14E-16	0.283319641	0.024396367	0.216935192	unnamed protein product [Brassica rapa]	-	-	-	-
MSTRG.16851	LCR46	0	0	0	0.32	1.88	0.69	0	0	0	0	0.9633	0	-9.911891277	0.00566815	0.024012895	0	1	1	defensin-like protein 91 [Capsella rubella]	-	-	-	-
MSTRG.16900	--	1.38	2.22	1.63	10.35	8.1	5.26	0.62	0.6	0.27	0.4967	7.9033	1.7433	-2.180612811	1.15E-07	1.22E-06	-1.811498616	0.000220424	0.005202973	Retrotransposon gag domain [Arabidopsis suecica]	-	-	-	-
MSTRG.16901	Os02g0301000	0.49	0.9	0.86	2.84	4.47	3.08	0.44	0.57	0.37	0.46	3.4633	0.75	-2.207198748	1.09E-05	8.53E-05	-0.705256734	0.438340961	0.949474746	zinc finger CCCH domain-containing protein 1 [Eutrema salsugineum]	-	-	-	-
MSTRG.16959	IAA13	0.34	0.32	0.17	0	0	0.15	0.22	0.03	0.33	0.1933	0.05	0.2767	2.468148836	0.0069135	0.02851273	-0.517058436	0.987264665	0.997276388	PREDICTED: auxin-responsive protein IAA13 isoform X1 [Camelina sativa]	ko04075//Plant hormone signal transduction	GO:0043231//intracellular membrane-bounded organelle	GO:0001071//nucleic acid binding transcription factor activity;GO:0005515//protein binding	GO:0000097//sulfur amino acid biosynthetic process;GO:0003002//regionalization;GO:0006355//regulation of transcription, DNA-templated;GO:0008380//RNA splicing;GO:0009755//hormone-mediated signaling pathway;GO:0009790//embryo development
MSTRG.17105	At1g21990	0.04	0.14	0	1.2	1.27	1.05	0.04	0	0.08	0.04	1.1733	0.06	-4.289506617	3.72E-05	0.000264524	-0.584962501	0.907357077	0.980399641	F-box/LRR-repeat protein At2g29930-like [Brassica rapa]	-	-	-	-
MSTRG.17123	--	6.16	7.46	7.07	2.57	2.9	2.24	9.5	7.27	8.94	8.57	2.57	6.8967	1.42413088	1.25E-18	3.44E-17	0.313395965	0.001470307	0.025256979	unnamed protein product, partial [Brassica napus]	-	-	-	-
MSTRG.17311	NPSN11	1.11	1.19	1.24	2.95	3.25	2.74	0.63	0.69	0.59	0.6367	2.98	1.18	-1.336525471	0.009848423	0.038506426	-0.890176722	0.144119933	0.623097971	novel plant SNARE 11 [Brassica rapa]	-	GO:0012505//endomembrane system;GO:0031224//intrinsic component of membrane;GO:0043231//intracellular membrane-bounded organelle;GO:0044444//cytoplasmic part;GO:0044446//intracellular organelle part;GO:0098588//bounding membrane of organelle	-	GO:0016482//cytoplasmic transport;GO:0048193//Golgi vesicle transport;GO:0061024//membrane organization;GO:1902410//mitotic cytokinetic process
MSTRG.17314	--	19.01	18.25	18.21	113.89	101	112.22	2.66	4.55	4.71	3.9733	109.0367	18.49	-2.559996234	1.65E-92	4.07E-90	-2.21832349	2.49E-21	9.55E-19	Neprosin activation peptide [Arabidopsis thaliana x Arabidopsis arenosa]	-	-	-	-
MSTRG.17327	At1g47710	0	0	0	0.1	1.34	2.36	0	0.04	0	0.0133	1.2667	0	-10.3068212	7.13E-06	5.79E-05	3.736965594	0.726652421	0.980399641	PREDICTED: serpin-ZX-like [Brassica oleracea var. oleracea] [Brassica oleracea]	-	-	-	-
MSTRG.17345	SCPL26	25.47	28.01	24.2	14.25	10.73	11.94	15.55	22.1	17.45	18.3667	12.3067	25.8933	1.073140648	4.12E-39	2.99E-37	-0.495490882	0.201562346	0.730719092	serine carboxypeptidase-like 26 isoform X2 [Brassica rapa]	-	GO:0043231//intracellular membrane-bounded organelle	GO:0004180//carboxypeptidase activity	GO:0000226//microtubule cytoskeleton organization;GO:0019538//protein metabolic process
MSTRG.1760	--	1.59	2.01	1.24	0.69	0.34	0.59	1.14	1.37	1.1	1.2033	0.54	1.6133	1.579013234	2.79E-08	3.22E-07	-0.42300821	0.779915238	0.980399641	hypothetical protein BRARA_A01447 [Brassica rapa]	-	-	-	-
MSTRG.17605	--	0.6	0.51	0.79	0	0	0	1.86	1.41	1.32	1.53	0	0.6333	9.306821202	4.85E-09	6.13E-08	1.272494735	4.25E-05	0.001260472	hypothetical protein Bca52824_044908 [Brassica carinata]	-	-	-	-
MSTRG.17807	--	3.91	4.19	3.78	26.81	21.42	15.78	1.55	1.9	1.83	1.76	21.3367	3.96	-2.429762472	1.22E-18	3.38E-17	-1.169925001	0.000111736	0.002911024	BnaCnng11940D [Brassica napus]	ko01100//Metabolic pathways;ko04145//Phagosome;ko04070//Phosphatidylinositol signaling system;ko00562//Inositol phosphate metabolism	-	-	-
MSTRG.18019	--	0.42	0.6	0.73	0.08	0.06	0	0.16	0.27	0.34	0.2567	0.0467	0.5833	3.64385619	0.001745529	0.008606396	-1.184424571	0.372978028	0.909899408	-	-	-	-	-
MSTRG.18122	--	0.89	0.29	0.77	0.1	0.17	0.08	0.32	0.59	0.56	0.49	0.1167	0.65	2.478047297	0.010459336	0.040532717	-0.407657969	0.924570461	0.983349279	-	-	-	-	-
MSTRG.18177	--	0.19	0.06	0	1.27	0.59	0.75	0	0	0.12	0.04	0.87	0.0833	-3.384049807	0.002440053	0.011543652	-1.058893689	0.722974578	0.980399641	hypothetical protein IGI04_017358, partial [Brassica rapa subsp. trilocularis] [Brassica rapa]	-	-	-	-
MSTRG.18257	--	1.75	1.06	2.32	12.9	12.66	11.55	1.4	1.47	1.2	1.3567	12.37	1.71	-2.85477727	8.89E-11	1.34E-09	-0.333930031	0.983768437	0.996570599	transmembrane protein [Arabidopsis thaliana]	-	-	-	-
MSTRG.1837	--	0	0	0	0.23	0.29	7.63	0	0	0	0	2.7167	0	-11.40762184	0.000686312	0.003739912	0	1	1	defensin-like protein 295 [Brassica rapa]	-	-	-	-
MSTRG.18505	--	3.26	2.08	2.01	2.07	1.29	2.39	0.82	0.93	0.83	0.86	1.9167	2.45	0.354182294	0.008168949	0.032881643	-1.510373184	0.003018357	0.045227751	-	-	-	-	-
MSTRG.18613	--	0.55	0.45	0.31	2.25	1.59	1.75	0.43	0.21	0.05	0.23	1.8633	0.4367	-2.093281471	9.21E-05	0.000605241	-0.924898545	0.428826453	0.942859829	At3g22970 [Arabidopsis thaliana]	-	GO:0009536//plastid	-	-
MSTRG.1864	SRG1	0.28	0.19	0.24	0	0.03	0	0.13	0.19	0.26	0.1933	0.01	0.2367	4.564784619	0.000745567	0.004027082	-0.291766124	0.996350487	0.999042396	PREDICTED: protein SRG1-like [Brassica oleracea var. oleracea] [Brassica oleracea]	-	-	GO:0016705//oxidoreductase activity, acting on paired donors, with incorporation or reduction of molecular oxygen;GO:0043169//cation binding;GO:0051213//dioxygenase activity	GO:0003006//developmental process involved in reproduction;GO:0007568//aging;GO:0009685//gibberellin metabolic process;GO:0009812//flavonoid metabolic process;GO:0009827//plant-type cell wall modification;GO:0010476//gibberellin mediated signaling pathway;GO:0044707//single-multicellular organism process;GO:1901576//organic substance biosynthetic process
MSTRG.18640	ULP1D	0.26	0.16	0.23	1.8	1.38	1.45	0.08	0.11	0.14	0.11	1.5433	0.2167	-2.83250057	7.84E-08	8.54E-07	-0.977973694	0.386591826	0.919071128	BnaAnng03310D [Brassica napus]	-	GO:0005634//nucleus	GO:0019783//ubiquitin-like protein-specific protease activity	GO:0003006//developmental process involved in reproduction;GO:0006970//response to osmotic stress;GO:0018205//peptidyl-lysine modification;GO:0042743//hydrogen peroxide metabolic process;GO:0045491//xylan metabolic process
MSTRG.18655	--	2.22	2.25	1.34	2.81	1.39	3.89	0.26	0.53	0.02	0.27	2.6967	1.9367	-0.477601539	0.614157816	0.847653512	-2.842544351	1.43E-05	0.000487425	BnaC07g15840D [Brassica napus]	-	-	-	-
MSTRG.18656	--	22.5	17.05	19.18	18.64	11.88	24.89	3.86	6.43	7.71	6	18.47	19.5767	0.083951271	0.003210686	0.014669421	-1.706100731	9.37E-10	8.15E-08	BnaC07g15840D [Brassica napus]	-	-	-	-
MSTRG.18663	--	1.56	0.97	0.87	2.49	2.36	2.77	0.12	0.34	0.37	0.2767	2.54	1.1333	-1.164256251	0.085933797	0.225987383	-2.034351505	0.002351365	0.036981156	hypothetical protein IGI04_015347 [Brassica rapa subsp. trilocularis] [Brassica rapa]	-	-	-	-
MSTRG.18667	--	1.16	1.01	0.64	1.72	2.61	2.83	0.07	0.48	0.16	0.2367	2.3867	0.9367	-1.349389457	0.012493019	0.04719227	-1.984679201	0.002325176	0.036669834	01P13-2 [Brassica rapa subsp. pekinensis] [Brassica rapa]	-	-	-	-
MSTRG.18669	--	1.44	1.98	1.57	2.16	1.89	2.25	0.13	0.27	0.21	0.2033	2.1	1.6633	-0.336312013	0.323997938	0.586669551	-3.032158668	9.14E-07	4.23E-05	hypothetical protein IGI04_042978 [Brassica rapa subsp. trilocularis] [Brassica rapa]	-	-	-	-
MSTRG.18693	--	1.23	1.24	1.87	9.36	8.77	8.3	0.42	0.47	0.51	0.4667	8.81	1.4467	-2.606409477	1.37E-15	3.08E-14	-1.632268215	0.00447695	0.062188421	LOW QUALITY PROTEIN: hypothetical protein HID58_022173, partial [Brassica napus]	-	-	-	-
MSTRG.19059	Tf2-12	0.3	0.2	0.25	1.54	1.41	1.53	1.51	1.59	1.36	1.4867	1.4933	0.25	-2.578536232	2.90E-14	5.93E-13	2.572081209	7.05E-32	8.58E-29	Ty3/gypsy retrotransposon protein [Cucumis melo var. makuwa] [Cucumis melo]	-	-	-	-
MSTRG.19089	--	3.03	3.01	3.27	0.63	1.2	1.48	5.36	3.88	6.96	5.4	1.1033	3.1033	1.491949951	2.83E-09	3.67E-08	0.79914074	2.80E-05	0.000871992	hypothetical protein DY000_02058152 [Brassica cretica]	-	-	-	-
MSTRG.19163	--	2.08	2.18	1.25	7.07	5.45	6.08	1.36	0.55	0.62	0.8433	6.2	1.8367	-1.755178397	0.001501524	0.007525908	-1.122914934	0.181829794	0.697171759	LEAF RUST 10 DISEASE-RESISTANCE LOCUS RECEPTOR-LIKE PROTEIN KINASE-like 1.1 isoform X1 [Brassica napus]	-	-	-	-
MSTRG.19214	--	1.62	1.21	1.85	0	0	0	10.24	7.62	9.6	9.1533	0	1.56	10.60733031	1.83E-08	2.16E-07	2.552751191	1.85E-18	5.50E-16	PREDICTED: cytochrome b561 and DOMON domain-containing protein At3g07570-like [Raphanus sativus]	-	-	-	-
MSTRG.1936	NPF5.2	92.41	93.12	85.61	1.82	1.93	2.73	73.95	84.05	67.11	75.0367	2.16	90.38	5.38690034	0	0	-0.268407816	0.48388133	0.971734863	protein NRT1/ PTR FAMILY 5.2 isoform X1 [Brassica rapa]	-	GO:0031224//intrinsic component of membrane	-	GO:0015833//peptide transport;GO:0051707//response to other organism
MSTRG.1937	NPF5.2	2.14	2.25	2.05	0.3	0	0.1	1.5	2.34	1.29	1.71	0.1333	2.1467	4.008988783	1.59E-14	3.32E-13	-0.328101863	0.983511446	0.996547346	PREDICTED: protein NRT1/ PTR FAMILY 5.2 isoform X2 [Musa acuminata subsp. malaccensis] [Musa acuminata]	-	GO:0031224//intrinsic component of membrane	-	GO:0015833//peptide transport;GO:0051707//response to other organism
MSTRG.19370	TMK3	0.28	0.22	0.21	2.2	1.17	1.31	0.07	0	0.18	0.0833	1.56	0.2367	-2.7206176	0.000240839	0.001455047	-1.50589093	0.303021604	0.851560125	receptor-like kinase TMK3 [Brassica rapa]	-	-	-	-
MSTRG.19528	--	0.3	0.42	0.15	1.15	1.54	1.33	0.82	0.23	0	0.35	1.34	0.29	-2.208108195	0.006322621	0.026398658	0.271302022	0.580826504	0.980399641	uncharacterized protein LOC108871975 [Brassica rapa]	-	-	-	-
MSTRG.19622	--	0.16	0.1	0.14	1.58	0.85	1.69	0.03	0.03	0	0.02	1.3733	0.1333	-3.364572432	3.68E-06	3.13E-05	-2.736965594	0.101463299	0.523221882	-	-	-	-	-
MSTRG.19632	--	1.92	1.81	0.89	11.94	7.38	6.85	0.61	1.23	1.16	1	8.7233	1.54	-2.501949168	5.10E-05	0.000353575	-0.622930351	0.683249554	0.980399641	BnaC06g42020D [Brassica napus]	-	-	-	-
MSTRG.19695	LKR/SDH	0.29	0.35	0.03	1.26	1.68	1.25	0.34	0.27	0.18	0.2633	1.3967	0.2233	-2.644717243	0.002107801	0.010174025	0.237691558	0.527455995	0.980399641	BnaC06g13670D [Brassica napus]	ko01100//Metabolic pathways;ko01110//Biosynthesis of secondary metabolites;ko00310//Lysine degradation	-	-	-
MSTRG.19697	--	0.07	0	0.11	0.87	2.87	0.77	0	0	0	0	1.5033	0.06	-4.647058622	0.000590742	0.003271434	-5.906890596	0.605097021	0.980399641	GAG-pre-integrase domain [Arabidopsis suecica]	-	-	-	-
MSTRG.19700	RHM2	0.52	0.51	0.43	1.77	1.71	1.78	0.24	0.54	0.35	0.3767	1.7533	0.4867	-1.84909443	0.000343669	0.002007209	-0.369645596	0.902075392	0.980399641	trifunctional UDP-glucose 4,6-dehydratase/UDP-4-keto-6-deoxy-D-glucose 3,5-epimerase/UDP-4-keto-L-rhamnose-reductase RHM2-like [Brassica napus]	ko00520//Amino sugar and nucleotide sugar metabolism	GO:0005911//cell-cell junction;GO:0009536//plastid	GO:0016616//oxidoreductase activity, acting on the CH-OH group of donors, NAD or NADP as acceptor;GO:0016836//hydro-lyase activity;GO:0048037//cofactor binding	GO:0009226//nucleotide-sugar biosynthetic process;GO:0009411//response to UV;GO:0010928//regulation of auxin mediated signaling pathway;GO:0033692//cellular polysaccharide biosynthetic process;GO:0034285//response to disaccharide;GO:0045229//external encapsulating structure organization;GO:0051553//flavone biosynthetic process
MSTRG.19762	F-ATMBP	146.24	146.72	165.89	7.79	4.29	6.85	334.46	270.47	348.23	317.72	6.31	152.95	4.599276291	4.09E-176	3.02E-173	1.054695802	2.01E-31	2.34E-28	jacalin-related lectin 34 isoform X1 [Brassica rapa]	-	GO:0043231//intracellular membrane-bounded organelle	-	GO:0003006//developmental process involved in reproduction;GO:0006950//response to stress;GO:0044699//single-organism process
MSTRG.19763	JAL5	25.98	26.1	28.89	1.61	1.11	1.5	59.85	49.34	62.24	57.1433	1.4067	26.99	4.262072573	1.96E-229	2.27E-226	1.082160218	1.45E-32	1.85E-29	jacalin-related lectin 34 isoform X2 [Brassica rapa]	-	GO:0005911//cell-cell junction;GO:0043231//intracellular membrane-bounded organelle;GO:0044444//cytoplasmic part	GO:0046914//transition metal ion binding	GO:0001101//response to acid chemical;GO:0006950//response to stress;GO:0007165//signal transduction;GO:0009628//response to abiotic stimulus;GO:0009725//response to hormone;GO:0019759//glycosinolate catabolic process;GO:0044271//cellular nitrogen compound biosynthetic process;GO:0050790//regulation of catalytic activity
MSTRG.19764	--	0.09	0.19	0.14	0	0	0	0.09	0.07	0.16	0.1067	0	0.14	7.129283017	0.001709087	0.008449152	-0.392317423	0.921509694	0.983104889	PREDICTED: mRNA turnover protein 4 homolog [Raphanus sativus]	-	GO:0005840//ribosome;GO:0043231//intracellular membrane-bounded organelle	-	GO:0009451//RNA modification;GO:0010467//gene expression
MSTRG.19898	ABCC4	2.76	3.03	2.47	13.31	10.46	10.65	1.21	1.42	1.44	1.3567	11.4733	2.7533	-2.059033411	1.77E-24	6.74E-23	-1.021112987	2.72E-05	0.000852924	BnaA05g17490D [Brassica napus]	ko02010//ABC transporters	GO:0031224//intrinsic component of membrane	GO:0015405//P-P-bond-hydrolysis-driven transmembrane transporter activity;GO:0016628//oxidoreductase activity, acting on the CH-CH group of donors, NAD or NADP as acceptor;GO:0017111//nucleoside-triphosphatase activity;GO:0032550//purine ribonucleoside binding	GO:0044710//single-organism metabolic process;GO:0044763//single-organism cellular process;GO:0051234//establishment of localization
MSTRG.19957	TDT	1.34	1.15	2.53	0.24	0.15	0.21	1.89	1.88	2.32	2.03	0.2	1.6733	3.064652958	4.05E-12	6.97E-11	0.278754864	0.109355783	0.544898814	Armadillo-type fold [Arabidopsis thaliana x Arabidopsis arenosa]	-	GO:0031224//intrinsic component of membrane;GO:0043231//intracellular membrane-bounded organelle	GO:0015556//C4-dicarboxylate transmembrane transporter activity	GO:0015740//C4-dicarboxylate transport;GO:0030001//metal ion transport;GO:0030641//regulation of cellular pH
MSTRG.19973	--	0.04	0	0	0.38	0.48	0.29	0	0	0.04	0.0133	0.3833	0.0133	-4.845490051	0.000414541	0.002374822	0	0.909332348	0.980399641	BnaC01g19700D [Brassica napus]	-	-	-	-
MSTRG.20057	--	7.83	8.5	6.28	2.89	1.66	2.41	6.89	8.65	6.13	7.2233	2.32	7.5367	1.699801781	6.19E-23	2.18E-21	-0.061261839	0.136970032	0.608668511	unnamed protein product [Brassica rapa]	-	-	-	-
MSTRG.20118	NET1A	1.22	1.31	1.13	4.42	3.67	3.6	0.5	0.58	0.57	0.55	3.8967	1.22	-1.675359376	7.87E-11	1.20E-09	-1.149377624	0.000274229	0.006287326	protein NETWORKED 1A [Brassica rapa]	-	-	-	-
MSTRG.20213	--	0	0.06	0.14	0.94	1.88	1.45	0	0.03	0.09	0.04	1.4233	0.0667	-4.416164165	1.89E-06	1.68E-05	-0.736965594	0.878499646	0.980399641	BnaAnng17590D [Brassica napus]	-	-	-	-
MSTRG.20307	CYP705A22	11.44	10.86	14.12	221.29	205.33	196.23	8.82	2.93	7.19	6.3133	207.6167	12.14	-4.096081936	5.39E-161	3.27E-158	-0.943294592	0.208726029	0.740774237	cytochrome P450 705A22 [Brassica rapa]	-	-	-	-
MSTRG.20347	--	0.41	0.23	0.33	2.29	2.03	1.07	0.17	0.19	0.1	0.1533	1.7967	0.3233	-2.474228621	0.0001047	0.000681069	-1.076350886	0.31464221	0.862108976	nucleolar transcription factor 1-B-like [Brassica napus]	-	-	-	-
MSTRG.20454	TSK	0.62	0.95	0.74	2.97	3.6	2.42	0.29	0.66	0.46	0.47	2.9967	0.77	-1.960428264	5.52E-05	0.000380699	-0.712197689	0.43509902	0.947496432	protein TONSOKU [Brassica rapa]	-	-	-	-
MSTRG.20478	--	6.57	6.9	8.13	14.86	15.11	16.3	7.61	6.33	6.75	6.8967	15.4233	7.2	-1.099045787	0.003202781	0.014637304	-0.062097667	0.141399611	0.617702079	unnamed protein product, partial [Brassica napus]	-	-	-	-
MSTRG.2049	FIM1	4	3.83	4.89	2.16	1.6	2.14	4.74	4.51	5.86	5.0367	1.9667	4.24	1.108311811	1.50E-14	3.14E-13	0.24840499	0.003508542	0.051189912	fimbrin-1 isoform X1 [Brassica rapa]	-	GO:0043232//intracellular non-membrane-bounded organelle	GO:0008092//cytoskeletal protein binding;GO:0046872//metal ion binding	GO:0006928//movement of cell or subcellular component;GO:0048511//rhythmic process;GO:0051640//organelle localization
MSTRG.20580	--	0.55	1.07	0.67	17.31	37.15	34.43	0.1	0	0.22	0.1067	29.63	0.7633	-5.278601624	4.71E-25	1.86E-23	-2.839203788	0.064171774	0.402616691	BnaA05g36870D [Brassica napus]	-	-	-	-
MSTRG.20590	--	1.84	2.23	1.99	4.77	5.63	5.91	1.08	1.22	1	1.1	5.4367	2.02	-1.428367083	0.000226672	0.00137853	-0.876851769	0.070670745	0.42690741	inactive leucine-rich repeat receptor-like serine/threonine-protein kinase At1g60630 [Brassica napus]	-	-	-	-
MSTRG.20841	CYP72A13	3.23	3.68	3.59	7.74	7.42	8.61	2.12	2.54	1.48	2.0467	7.9233	3.5	-1.178752575	0.000467615	0.00264818	-0.774078767	0.056961078	0.375760746	cytochrome P450 72A13 [Brassica rapa]	-	GO:0031224//intrinsic component of membrane;GO:0043231//intracellular membrane-bounded organelle	GO:0016491//oxidoreductase activity;GO:0046906//tetrapyrrole binding;GO:0046914//transition metal ion binding	GO:0030001//metal ion transport;GO:0044710//single-organism metabolic process;GO:0048511//rhythmic process
MSTRG.20867	--	0.97	1.12	1.37	0.18	0	0.14	4.17	2.8	1.57	2.8467	0.1067	1.1533	3.434628228	7.61E-05	0.00050961	1.303464032	0.002716685	0.041502793	LOW QUALITY PROTEIN: pentatricopeptide repeat-containing protein At3g14330 [Arabidopsis lyrata subsp. lyrata] [Arabidopsis lyrata]	-	-	-	-
MSTRG.20883	--	4.19	4.72	4.19	12.05	10.9	10.63	4.64	3.8	3.12	3.8533	11.1933	4.3667	-1.358035419	3.95E-09	5.03E-08	-0.180425414	0.399820975	0.927930949	BnaA05g12520D [Brassica napus]	-	GO:0005911//cell-cell junction;GO:0043231//intracellular membrane-bounded organelle	-	-
MSTRG.20976	N6amt1	0.42	0.2	0.43	0.97	1.93	1.95	0.11	0.24	0.31	0.22	1.6167	0.35	-2.207595419	0.004229749	0.018643343	-0.669851398	0.668999501	0.980399641	methyltransferase N6AMT1 [Brassica rapa]	-	GO:0043231//intracellular membrane-bounded organelle	GO:0008168//methyltransferase activity	GO:0008213//protein alkylation
MSTRG.21033	WRKY2	1.58	1.84	1.65	4.27	3.97	3.86	1.01	1.13	0.87	1.0033	4.0333	1.69	-1.254949395	0.000262619	0.001573437	-0.75222226	0.079236236	0.45655501	WRKY transcription factor 2, partial [Brassica napus]	ko04626//Plant-pathogen interaction	GO:0043231//intracellular membrane-bounded organelle	GO:0003677//DNA binding	GO:0000578//embryonic axis specification;GO:0006950//response to stress;GO:0007163//establishment or maintenance of cell polarity;GO:0010468//regulation of gene expression;GO:0034645//cellular macromolecule biosynthetic process;GO:0048229//gametophyte development
MSTRG.2126	PORB	10.45	9.78	9.5	36.68	38.41	36.75	3.13	4.21	2.59	3.31	37.28	9.91	-1.911444897	4.10E-39	2.98E-37	-1.58205384	6.32E-11	6.80E-09	protochlorophyllide reductase precursor [Arabidopsis thaliana]	ko01100//Metabolic pathways;ko01110//Biosynthesis of secondary metabolites;ko00860//Porphyrin metabolism	GO:0009527//plastid outer membrane;GO:0031976//plastid thylakoid;GO:0044434//chloroplast part	GO:0016628//oxidoreductase activity, acting on the CH-CH group of donors, NAD or NADP as acceptor	GO:0000097//sulfur amino acid biosynthetic process;GO:0005982//starch metabolic process;GO:0006091//generation of precursor metabolites and energy;GO:0006355//regulation of transcription, DNA-templated;GO:0006779//porphyrin-containing compound biosynthetic process;GO:0009725//response to hormone;GO:0009887//organ morphogenesis;GO:0048869//cellular developmental process
MSTRG.21558	--	0.2	0.14	0.1	1.23	1.68	1.24	0.33	0.13	0.12	0.1933	1.3833	0.1467	-3.237535908	3.38E-05	0.00024243	0.398549376	0.462404146	0.963914554	short-chain dehydrogenase reductase 3b isoform X2 [Brassica rapa]	-	-	-	-
MSTRG.21624	HSP17.4B	0	0	0.04	0.61	3.08	0.04	0	0	0	0	1.2433	0.0133	-6.54303182	0.001399234	0.007072615	-3.736965594	0.903039578	0.980399641	PREDICTED: LOW QUALITY PROTEIN: 17.4 kDa class III heat shock protein [Brassica oleracea var. oleracea] [Brassica oleracea]	ko04141//Protein processing in endoplasmic reticulum	-	-	GO:0006950//response to stress
MSTRG.21630	MVP1	1.02	1.42	0.8	5.32	6.54	1.93	0.58	0.84	0.86	0.76	4.5967	1.08	-2.089556739	0.001543828	0.007712952	-0.506959989	0.685803472	0.980399641	inactive GDSL esterase/lipase-like protein 25 [Brassica rapa]	-	GO:0005576//extracellular region;GO:0005774//vacuolar membrane;GO:0005840//ribosome;GO:0005911//cell-cell junction;GO:0009526//plastid envelope;GO:0042579//microbody	GO:0016788//hydrolase activity, acting on ester bonds	GO:0006796//phosphate-containing compound metabolic process;GO:0006886//intracellular protein transport;GO:0006950//response to stress;GO:0006996//organelle organization;GO:0009617//response to bacterium;GO:0019637//organophosphate metabolic process;GO:0019759//glycosinolate catabolic process;GO:0044238//primary metabolic process;GO:0044249//cellular biosynthetic process;GO:0044711//single-organi…
MSTRG.21647	CSLE1	0.04	0.12	0	0.77	0.93	0.7	0.07	0.04	0	0.0367	0.8	0.0533	-3.906890596	0.000497359	0.002801246	-0.540568381	0.903199134	0.980399641	cellulose synthase-like protein E1 [Brassica napus]	-	-	GO:0016740//transferase activity	-
MSTRG.21752	SPH6	5.37	4.1	4.23	23.33	30.33	25.62	3.47	3.25	3.05	3.2567	26.4267	4.5667	-2.532781069	4.77E-35	2.94E-33	-0.487745426	0.412449305	0.935359008	Plant self-incompatibility S1 [Arabidopsis thaliana x Arabidopsis arenosa]	ko03008//Ribosome biogenesis in eukaryotes	GO:0005911//cell-cell junction;GO:0043231//intracellular membrane-bounded organelle	-	GO:0006605//protein targeting
MSTRG.21856	HAT	0.56	0.1	0.54	1.59	2	1.83	0.52	0.53	0.84	0.63	1.8067	0.4	-2.175258446	0.003444056	0.015610177	0.655351829	0.096254165	0.50851736	zinc finger BED domain-containing protein DAYSLEEPER [Brassica rapa]	-	-	GO:0005488//binding	-
MSTRG.21872	TGD4	6.41	5.85	6.56	14.06	15.89	16.42	4.61	4.09	4.27	4.3233	15.4567	6.2733	-1.300925099	1.66E-06	1.49E-05	-0.537088148	0.231772339	0.773780834	protein TRIGALACTOSYLDIACYLGLYCEROL 4, chloroplastic [Brassica rapa]	-	GO:0009527//plastid outer membrane;GO:0031224//intrinsic component of membrane	GO:0005543//phospholipid binding;GO:0046983//protein dimerization activity	GO:0006625//protein targeting to peroxisome;GO:0030001//metal ion transport;GO:0032365//intracellular lipid transport;GO:0048193//Golgi vesicle transport
MSTRG.22182	At3g16895	3.87	4	3.86	10.26	16.17	9.35	2.83	3.09	2.52	2.8133	11.9267	3.91	-1.608950374	0.001036237	0.005412338	-0.474888109	0.659295703	0.980399641	PREDICTED: defensin-like protein 49 [Camelina sativa]	-	-	-	-
MSTRG.2230	At4g28400	2.76	3.06	2.77	6.74	8.06	7.09	2.01	1.95	1.84	1.9333	7.2967	2.8633	-1.349541918	1.50E-06	1.36E-05	-0.566605231	0.208540065	0.740710182	BnaC09g41410D [Brassica napus]	-	-	GO:0004721//phosphoprotein phosphatase activity;GO:0043169//cation binding	GO:0006568//tryptophan metabolic process;GO:0009683//indoleacetic acid metabolic process;GO:0009814//defense response, incompatible interaction
MSTRG.22327	--	0	0	0.08	0.93	1.68	0.81	0	0	0	0	1.14	0.0267	-5.417852515	0.002074155	0.010031473	-4.736965594	0.903039578	0.980399641	unnamed protein product [Brassica napus]	-	-	-	-
MSTRG.22419	IRKI	0.62	0.59	0.54	2.48	2.86	2.12	0.29	0.55	0.62	0.4867	2.4867	0.5833	-2.091820708	4.65E-06	3.90E-05	-0.261386553	0.885789511	0.980399641	IRK-interacting protein [Brassica rapa]	-	-	-	-
MSTRG.22578	--	1.13	1.43	1.45	0.55	0.23	0.96	1.3	1.27	1.32	1.2967	0.58	1.3367	1.204514931	0.002924087	0.013514437	-0.043832081	0.527460823	0.980399641	signal recognition particle 54 kDa subunit [Arabidopsis thaliana]	-	-	-	-
MSTRG.22665	--	0.51	0.68	0.4	1.21	0.9	1.01	0.13	0.04	0.06	0.0767	1.04	0.53	-0.972519264	0.25612896	0.500959508	-2.789320999	3.63E-05	0.001099165	GAG-pre-integrase domain, partial [Arabidopsis suecica]	-	-	-	-
MSTRG.227	CPK28	0.42	0.37	0.37	2.39	1.98	2.47	0.56	0.81	0.34	0.57	2.28	0.3867	-2.55987152	0.001676879	0.00830615	0.55987152	0.316323007	0.863877946	calcium-dependent protein kinase 28-like [Brassica napus]	ko04626//Plant-pathogen interaction	-	-	-
MSTRG.22899	--	3.7	3.69	3.86	1.64	1.66	1.51	2.95	3.1	2.53	2.86	1.6033	3.75	1.225816202	5.37E-09	6.76E-08	-0.390875449	0.837960656	0.980399641	-	-	-	-	-
MSTRG.22991	DRP1C	1.92	2.01	2.02	6.08	6.54	6.01	1.39	1.45	1.69	1.51	6.21	1.9833	-1.646666101	7.35E-08	8.02E-07	-0.393378618	0.818590652	0.980399641	PREDICTED: dynamin-related protein 1C-like [Raphanus sativus]	-	GO:0005911//cell-cell junction;GO:0015630//microtubule cytoskeleton;GO:0031090//organelle membrane;GO:0043231//intracellular membrane-bounded organelle;GO:0044444//cytoplasmic part	GO:0003676//nucleic acid binding;GO:0017111//nucleoside-triphosphatase activity;GO:0032550//purine ribonucleoside binding	GO:0006605//protein targeting;GO:0006952//defense response;GO:0007005//mitochondrion organization;GO:0009555//pollen development;GO:0009617//response to bacterium;GO:0009620//response to fungus;GO:0009696//salicylic acid metabolic process;GO:0009755//hormone-mediated signaling pathway;GO:0009863//salicylic acid mediated signaling pathway;GO:0010038//response to metal ion;GO:0010243//response to o…
MSTRG.23006	--	0	0	0.02	0.37	2.86	1.92	0	0	0	0	1.7167	0.0067	-8.008428622	2.24E-07	2.29E-06	-2.736965594	0.903039578	0.980399641	BnaC06g00390D [Brassica napus]	-	GO:0043231//intracellular membrane-bounded organelle	GO:0005515//protein binding	GO:0000302//response to reactive oxygen species;GO:0009642//response to light intensity;GO:0010468//regulation of gene expression;GO:0015833//peptide transport;GO:0033554//cellular response to stress;GO:0034645//cellular macromolecule biosynthetic process;GO:0044267//cellular protein metabolic process
MSTRG.23064	--	0.87	0.77	0.76	0.17	0.09	0.14	0.18	0.46	0.37	0.3367	0.1333	0.8	2.584962501	7.32E-05	0.000492019	-1.248679113	0.215133428	0.75052247	BnaA06g02200D [Brassica napus]	-	-	-	-
MSTRG.23088	PUB27	0.31	0.24	0.24	1.2	1.16	1.09	0.12	0.29	0.18	0.1967	1.15	0.2633	-2.126671803	6.72E-05	0.000455046	-0.421137699	0.892682345	0.980399641	U-box domain-containing protein 27-like [Brassica napus]	-	GO:0005911//cell-cell junction;GO:0044424//intracellular part	GO:0019787//ubiquitin-like protein transferase activity;GO:0033612//receptor serine/threonine kinase binding	GO:0002252//immune effector process;GO:0007165//signal transduction;GO:0009620//response to fungus;GO:0010243//response to organonitrogen compound;GO:0032446//protein modification by small protein conjugation
MSTRG.23116	--	0	0	0	2.51	3.58	2.82	0	0	0	0	2.97	0	-11.53624722	1.93E-09	2.55E-08	0	1	1	hypothetical protein HID58_021927, partial [Brassica napus]	-	-	-	-
MSTRG.23161	--	1.24	1.64	1.08	4.58	4.55	4.23	0.71	1.04	0.88	0.8767	4.4533	1.32	-1.754347672	8.28E-05	0.000549331	-0.590437631	0.561722695	0.980399641	hypothetical protein IGI04_034581 [Brassica rapa subsp. trilocularis] [Brassica rapa]	-	-	-	-
MSTRG.23162	--	1.24	1.64	1.08	4.58	4.55	4.23	0.71	1.04	0.88	0.8767	4.4533	1.32	-1.754347672	8.28E-05	0.000549331	-0.590437631	0.561722695	0.980399641	hypothetical protein IGI04_034581 [Brassica rapa subsp. trilocularis] [Brassica rapa]	-	-	-	-
MSTRG.23167	IQD32	4.28	4.6	4.39	14.65	13.32	14.72	4.05	4.01	3.35	3.8033	14.23	4.4233	-1.685729792	6.61E-20	1.98E-18	-0.217869579	0.455868533	0.960958631	protein IQ-DOMAIN 32 isoform X1 [Brassica rapa]	-	GO:0009526//plastid envelope;GO:0016020//membrane;GO:0043234//protein complex	-	GO:0000097//sulfur amino acid biosynthetic process;GO:0001101//response to acid chemical;GO:0008380//RNA splicing;GO:0009409//response to cold
MSTRG.23172	At1g19940	0.05	0	0.04	0.37	0.78	0.75	0	0	0.05	0.0167	0.6333	0.03	-4.399930607	9.74E-05	0.000637753	-0.847996907	0.829417877	0.980399641	BnaA06g14150D [Brassica napus]	-	GO:0016020//membrane	GO:0004553//hydrolase activity, hydrolyzing O-glycosyl compounds	GO:0003006//developmental process involved in reproduction;GO:0006637//acyl-CoA metabolic process;GO:0009755//hormone-mediated signaling pathway;GO:0009826//unidimensional cell growth;GO:0016129//phytosteroid biosynthetic process;GO:0030243//cellulose metabolic process;GO:0032535//regulation of cellular component size;GO:0042546//cell wall biogenesis;GO:0043479//pigment accumulation in tissues in…
MSTRG.23178	At1g20050	0.44	0.67	0.48	2.07	1.84	1.72	0.79	0.3	0.52	0.5367	1.8767	0.53	-1.824108157	0.004930699	0.021289233	0.018033923	0.566669052	0.980399641	probable 3-beta-hydroxysteroid-Delta(8),Delta(7)-isomerase [Brassica rapa]	ko01100//Metabolic pathways;ko01110//Biosynthesis of secondary metabolites;ko00100//Steroid biosynthesis	GO:0031090//organelle membrane;GO:0031224//intrinsic component of membrane;GO:0043231//intracellular membrane-bounded organelle	GO:0016863//intramolecular oxidoreductase activity, transposing C=C bonds	GO:0006637//acyl-CoA metabolic process;GO:0016129//phytosteroid biosynthetic process;GO:0035556//intracellular signal transduction;GO:0060147//regulation of posttranscriptional gene silencing
MSTRG.23213	SD22	4.04	5.14	5.66	10.02	10.81	10.13	2.67	3.22	3.73	3.2067	10.32	4.9467	-1.06091438	0.009383914	0.036954857	-0.625382293	0.137790879	0.610195459	G-type lectin S-receptor-like serine/threonine-protein kinase SD2-2 [Brassica napus]	-	-	-	-
MSTRG.23247	MAP70.5	0.57	0.67	0.96	3.45	2.9	3.79	0.32	0.09	0.64	0.35	3.38	0.7333	-2.204482223	5.66E-05	0.000388931	-1.067114196	0.33248244	0.875405205	Pollen Ole e 1 allergen and extensin family protein [Arabidopsis thaliana]	-	GO:0031090//organelle membrane;GO:0036452//ESCRT complex	GO:0005488//binding	GO:0008104//protein localization;GO:0009408//response to heat;GO:0051668//localization within membrane;GO:1902582//single-organism intracellular transport
MSTRG.23258	LAX2	4.7	5.54	4.6	11.21	10.99	11.3	1.66	2.26	2.28	2.0667	11.1667	4.9467	-1.174670004	0.000163325	0.00102545	-1.259150971	2.73E-05	0.000852924	PREDICTED: auxin transporter-like protein 2 isoform X1 [Camelina sativa]	ko04075//Plant hormone signal transduction	GO:0016020//membrane	GO:0022857//transmembrane transporter activity	GO:0009653//anatomical structure morphogenesis;GO:0009725//response to hormone;GO:0010051//xylem and phloem pattern formation;GO:0010817//regulation of hormone levels;GO:0016049//cell growth;GO:0046942//carboxylic acid transport;GO:0048509//regulation of meristem development;GO:0048589//developmental growth;GO:0051707//response to other organism;GO:0071704//organic substance metabolic process
MSTRG.23365	--	0.84	0.45	0.95	7.52	6.62	7.27	0.84	0.8	1.1	0.9133	7.1367	0.7467	-3.256714158	3.74E-10	5.33E-09	0.290677161	0.346857928	0.890420214	PREDICTED: L-type lectin-domain containing receptor kinase I.7-like [Brassica oleracea var. oleracea] [Brassica oleracea]	-	-	-	-
MSTRG.2341	SCPL42	3.1	2.48	4.43	7.86	8.98	7.63	3.17	2.28	5.84	3.7633	8.1567	3.3367	-1.289572127	0.007412215	0.030259905	0.173603512	0.150073141	0.636134526	serine carboxypeptidase-like 42 [Brassica rapa]	-	GO:0030312//external encapsulating structure	GO:0004180//carboxypeptidase activity	GO:0019538//protein metabolic process
MSTRG.23413	--	0.7	0.65	0.5	2.09	2.2	1.72	0.69	0.52	0.21	0.4733	2.0033	0.6167	-1.69983972	0.002509832	0.011840246	-0.381634341	0.948841346	0.98953742	hypothetical protein N665_0363s0021 [Sinapis alba]	-	-	-	-
MSTRG.23427	--	78.68	56.63	48.18	261.5	477.15	364.74	27.64	41.36	35.48	34.8267	367.7967	61.1633	-2.588169465	5.00E-20	1.51E-18	-0.812474638	0.009813247	0.112271365	BnaA06g16030D [Brassica napus]	-	-	-	-
MSTRG.23434	--	32.49	35.38	40.34	81.09	94.07	95.85	10.32	12.44	9.86	10.8733	90.3367	36.07	-1.324512258	1.27E-06	1.16E-05	-1.730005142	8.42E-15	1.59E-12	BnaA06g16030D [Brassica napus]	-	-	-	-
MSTRG.2345	At1g58055	0	0	0	0.11	0.84	7	0	0	0	0	2.65	0	-11.37177664	0.000496301	0.002796036	0	1	1	BnaC03g66980D [Brassica napus]	-	-	-	-
MSTRG.23456	--	8.22	8.92	6.06	18.69	14.13	19.61	3.95	4.68	3.31	3.98	17.4767	7.7333	-1.176267741	0.002858432	0.013257202	-0.958321969	0.001926816	0.031576955	sn1-specific diacylglycerol lipase alpha [Eutrema salsugineum]	-	-	GO:0005515//protein binding;GO:0016298//lipase activity	GO:0006629//lipid metabolic process;GO:0050896//response to stimulus
MSTRG.23549	At3g20650	1.23	1	0.89	2.13	2.55	3.16	0.71	0.79	0.85	0.7833	2.6133	1.04	-1.329307625	0.006433079	0.02679156	-0.408885272	0.976086297	0.99483637	heat-inducible transcription repressor [Arabidopsis thaliana]	-	-	-	-
MSTRG.23584	LCR61	0.13	0	0	2.2	7.91	9.89	0	0	0.13	0.0433	6.6667	0.0433	-7.265344567	1.17E-06	1.08E-05	0	0.909332348	0.980399641	PREDICTED: defensin-like protein 172 [Camelina sativa]	-	-	-	-
MSTRG.23689	--	0.06	0.11	0	0.91	2.78	2.23	0	0	0	0	1.9733	0.0567	-5.121990524	2.90E-05	0.000210911	-5.824428435	0.613318757	0.980399641	unnamed protein product [Brassica napus]	-	-	-	-
MSTRG.2376	--	0.05	0.06	0.1	1.77	1.39	0.99	0	0.02	0.05	0.0233	1.3833	0.07	-4.304650103	8.52E-09	1.05E-07	-1.584962501	0.440922676	0.951081627	unnamed protein product [Brassica rapa]	-	-	-	-
MSTRG.23850	--	0.04	0.44	0.14	0	0	0	0.04	0.13	0.08	0.0833	0	0.2067	7.691161905	0.002686129	0.012553549	-1.310340121	0.451649579	0.958757663	protein ANTAGONIST OF LIKE HETEROCHROMATIN PROTEIN 1-like [Brassica rapa]	-	-	-	-
MSTRG.23898	--	5.7	7.45	5.08	12.78	11.21	12.2	2.2	3.89	2.49	2.86	12.0633	6.0767	-0.989276546	0.037031626	0.116484102	-1.087265009	0.002807088	0.042679166	protein IQ-DOMAIN 1-like [Brassica napus]	-	GO:0043231//intracellular membrane-bounded organelle	-	GO:0009886//post-embryonic morphogenesis
MSTRG.23925	--	0	0	0	0.11	0.18	0.26	0	0	0	0	0.1833	0	-7.518325308	0.011886571	0.04522657	0	1	1	BnaC01g27690D [Brassica napus]	ko03420//Nucleotide excision repair;ko03440//Homologous recombination;ko03030//DNA replication;ko03430//Mismatch repair	-	-	-
MSTRG.23990	--	5.31	6.32	5.44	0.49	0.82	0.65	5.94	7.05	5.47	6.1533	0.6533	5.69	3.122537499	1.46E-59	1.79E-57	0.112939495	0.004876854	0.066482846	BnaA08g07770D [Brassica napus]	-	-	-	-
MSTRG.24240	HAM1	0	0	0.02	3.57	3.01	2.76	0	0	0.06	0.02	3.1133	0.0067	-8.86727874	2.50E-10	3.62E-09	1.584962501	0.705689711	0.980399641	histone acetyltransferase of the MYST family 1 [Eutrema salsugineum]	-	GO:0043231//intracellular membrane-bounded organelle	GO:0046872//metal ion binding;GO:0090595//acetyl-CoA:L-lysine N6-acetyltransferase	GO:0000226//microtubule cytoskeleton organization;GO:0000904//cell morphogenesis involved in differentiation;GO:0006259//DNA metabolic process;GO:0009411//response to UV;GO:0010074//maintenance of meristem identity;GO:0010468//regulation of gene expression;GO:0042127//regulation of cell proliferation
MSTRG.24241	--	0	0	0	2.51	2.13	2.27	0	0	0	0	2.3033	0	-11.16950749	2.83E-11	4.49E-10	0	1	1	BnaAnng30230D [Brassica napus]	-	GO:0043231//intracellular membrane-bounded organelle	-	GO:0006950//response to stress;GO:0044699//single-organism process
MSTRG.24250	SUC1	1.48	1.31	1.35	0.49	0.15	0.3	1.02	2.01	0.95	1.3267	0.3133	1.38	2.138898106	1.30E-05	0.000100533	-0.056862337	0.604453215	0.980399641	sucrose transport protein SUC1-like [Brassica napus]	-	GO:0005911//cell-cell junction;GO:0031224//intrinsic component of membrane;GO:0043231//intracellular membrane-bounded organelle	GO:0005351//sugar:proton symporter activity;GO:0015154//disaccharide transmembrane transporter activity;GO:0015573//beta-glucoside transmembrane transporter activity;GO:0051183//vitamin transporter activity	GO:0015718//monocarboxylic acid transport;GO:0015766//disaccharide transport;GO:0042886//amide transport;GO:0044763//single-organism cellular process;GO:0048580//regulation of post-embryonic development;GO:0051707//response to other organism;GO:0090567//reproductive shoot system development;GO:1901656//glycoside transport
MSTRG.24496	HSK	0.53	0.55	0.47	1.5	1.49	1.67	0.87	0.63	0.47	0.6567	1.5533	0.5167	-1.588061739	0.008617309	0.03437173	0.345927414	0.158077308	0.652308082	BnaA07g36280D [Brassica napus]	ko01100//Metabolic pathways;ko01110//Biosynthesis of secondary metabolites;ko01230//Biosynthesis of amino acids;ko00260//Glycine, serine and threonine metabolism	GO:0009532//plastid stroma	GO:0016773//phosphotransferase activity, alcohol group as acceptor;GO:0032550//purine ribonucleoside binding	GO:0000097//sulfur amino acid biosynthetic process;GO:0006566//threonine metabolic process;GO:0006796//phosphate-containing compound metabolic process;GO:0006950//response to stress;GO:0008380//RNA splicing;GO:0051707//response to other organism
MSTRG.24591	SNL5	0.77	1.01	0.75	1.08	0.49	0.75	0.19	0.27	0.16	0.2067	0.7733	0.8433	0.12501258	0.049757443	0.147454367	-2.028797264	0.000205154	0.004892173	paired amphipathic helix protein Sin3-like 5 isoform X2 [Capsella rubella]	-	-	-	GO:0010467//gene expression
MSTRG.2468	--	44.89	43.19	46.19	7.74	7.79	10.12	53.5	51.39	50.34	51.7433	8.55	44.7567	2.388106268	2.30E-102	6.51E-100	0.209270403	1.20E-08	8.29E-07	glucosidase 2 subunit beta-like [Brassica napus]	-	-	-	-
MSTRG.2469	--	10.51	9.98	10.47	2.41	1	2	10.01	12.38	10.01	10.8	1.8033	10.32	2.516704972	1.29E-27	5.84E-26	0.065588342	0.01774749	0.174004573	hypothetical protein IGI04_023777 [Brassica rapa subsp. trilocularis] [Brassica rapa]	-	-	-	-
MSTRG.2486	DXS	4.21	5.45	4.22	8.48	7.37	9.19	1.61	2.64	1.56	1.9367	8.3467	4.6267	-0.851226994	0.163990629	0.366258598	-1.256397499	4.66E-05	0.001360238	PREDICTED: 1-deoxy-D-xylulose-5-phosphate synthase, chloroplastic [Brassica oleracea var. oleracea] [Brassica oleracea]	ko01100//Metabolic pathways;ko01110//Biosynthesis of secondary metabolites;ko00900//Terpenoid backbone biosynthesis;ko00730//Thiamine metabolism	GO:0009532//plastid stroma	GO:0016744//transferase activity, transferring aldehyde or ketonic groups;GO:0043169//cation binding	GO:0000097//sulfur amino acid biosynthetic process;GO:0006090//pyruvate metabolic process;GO:0006355//regulation of transcription, DNA-templated;GO:0006468//protein phosphorylation;GO:0006544//glycine metabolic process;GO:0006633//fatty acid biosynthetic process;GO:0006732//coenzyme metabolic process;GO:0006753//nucleoside phosphate metabolic process;GO:0006772//thiamine metabolic process;GO:0006…
MSTRG.24861	--	0.96	0.88	0.87	1.83	2.2	2.37	0.96	1.05	0.94	0.9833	2.1333	0.9033	-1.239779054	0.002628712	0.012323823	0.122422103	0.046428791	0.331217998	myosin heavy chain, cardiac muscle isoform [Brassica rapa]	-	-	-	-
MSTRG.24903	--	0	0	0	1.7	4.81	3.48	0.04	0	0	0.0133	3.33	0	-11.70130646	2.56E-10	3.70E-09	3.736965594	0.726652421	0.980399641	hypothetical protein BRARA_F02935 [Brassica rapa]	-	-	-	-
MSTRG.2497	UGT84A4	0.52	0.53	0.78	0.45	0.12	0.23	0.52	0.55	0.54	0.5367	0.2667	0.61	1.193771743	0.001343911	0.006821041	-0.18478296	0.764895288	0.980399641	hydroxycinnamate glucosyltransferase [Brassica napus]	-	-	-	-
MSTRG.25150	SMC4	1	0.93	0.46	7.01	7.2	5.66	0.42	0.4	0.41	0.41	6.6233	0.7967	-3.055509349	7.62E-19	2.13E-17	-0.958352303	0.155045655	0.645659068	structural maintenance of chromosomes protein 4 [Brassica rapa]	-	GO:0043231//intracellular membrane-bounded organelle;GO:0043232//intracellular non-membrane-bounded organelle	GO:0032550//purine ribonucleoside binding	GO:0000819//sister chromatid segregation;GO:0002252//immune effector process;GO:0003006//developmental process involved in reproduction;GO:0006305//DNA alkylation;GO:0006342//chromatin silencing;GO:0030422//production of siRNA involved in RNA interference;GO:0034968//histone lysine methylation;GO:0048580//regulation of post-embryonic development;GO:0051052//regulation of DNA metabolic process;GO:…
MSTRG.25151	SMC4	0.7	1.04	0.52	5.79	6.2	5.49	0.18	0.3	0.35	0.2767	5.8267	0.7533	-2.951310507	1.87E-18	5.12E-17	-1.445139531	0.03298396	0.266383266	structural maintenance of chromosomes protein 4-like [Brassica napus]	-	GO:0043231//intracellular membrane-bounded organelle;GO:0043232//intracellular non-membrane-bounded organelle	GO:0032550//purine ribonucleoside binding	GO:0000819//sister chromatid segregation;GO:0002252//immune effector process;GO:0003006//developmental process involved in reproduction;GO:0006305//DNA alkylation;GO:0006342//chromatin silencing;GO:0030422//production of siRNA involved in RNA interference;GO:0034968//histone lysine methylation;GO:0048580//regulation of post-embryonic development;GO:0051052//regulation of DNA metabolic process;GO:…
MSTRG.25371	At3g26430	1.05	1.08	0.86	3.28	4.92	3.69	0.65	0.67	0.79	0.7033	3.9633	0.9967	-1.991531326	7.09E-06	5.76E-05	-0.502902485	0.697434994	0.980399641	GDSL esterase/lipase At3g26430 [Brassica rapa]	-	GO:0005576//extracellular region;GO:0005618//cell wall	GO:0015928//fucosidase activity;GO:0052689//carboxylic ester hydrolase activity	GO:0006629//lipid metabolic process;GO:0019758//glycosinolate biosynthetic process
MSTRG.25421	BGLU3	0.93	0.47	0.52	0.12	0.03	0.03	1.59	0.99	1.37	1.3167	0.06	0.64	3.415037499	1.80E-05	0.000135631	1.040746342	0.005318955	0.071136971	PREDICTED: beta-glucosidase 3-like isoform X4 [Brassica oleracea var. oleracea] [Brassica oleracea]	ko01100//Metabolic pathways;ko01110//Biosynthesis of secondary metabolites;ko00940//Phenylpropanoid biosynthesis;ko00500//Starch and sucrose metabolism;ko00460//Cyanoamino acid metabolism	GO:0043231//intracellular membrane-bounded organelle	GO:0016798//hydrolase activity, acting on glycosyl bonds	GO:0009608//response to symbiont;GO:0009812//flavonoid metabolic process
MSTRG.25504	--	0.24	0.56	0.64	0.13	0.07	0.11	0.18	0.1	0.2	0.16	0.1033	0.48	2.215728691	0.001933215	0.009429939	-1.584962501	0.173503296	0.681354365	BnaAnng09140D [Brassica napus]	ko03420//Nucleotide excision repair;ko03440//Homologous recombination;ko03030//DNA replication;ko03430//Mismatch repair	-	-	-
MSTRG.25563	RNS1	8.01	5.62	3.44	12.03	14.27	16.72	3.47	2.66	3.18	3.1033	14.34	5.69	-1.333544466	0.010573055	0.040914575	-0.874609985	0.100677074	0.52121779	ribonuclease 1 [Brassica rapa]	-	GO:0016020//membrane;GO:0030312//external encapsulating structure	GO:0016892//endoribonuclease activity, producing 3'-phosphomonoesters	GO:0006812//cation transport;GO:0009267//cellular response to starvation;GO:0009755//hormone-mediated signaling pathway;GO:0009813//flavonoid biosynthetic process;GO:0044767//single-organism developmental process;GO:0046942//carboxylic acid transport;GO:0090501//RNA phosphodiester bond hydrolysis
MSTRG.25598	IDD4	4.23	5.2	3.74	13.68	9.78	10.71	1.96	2.77	1.56	2.0967	11.39	4.39	-1.375474902	7.89E-05	0.000526153	-1.066123423	0.001808356	0.029952014	LOW QUALITY PROTEIN: protein indeterminate-domain 4, chloroplastic [Brassica rapa]	-	GO:0009536//plastid	GO:0001071//nucleic acid binding transcription factor activity;GO:0003676//nucleic acid binding;GO:0043169//cation binding	GO:0006355//regulation of transcription, DNA-templated;GO:0006996//organelle organization;GO:0009887//organ morphogenesis;GO:0010608//posttranscriptional regulation of gene expression;GO:0048869//cellular developmental process
MSTRG.25692	FPS1	0.51	0.35	0.42	4.7	3.62	3.45	0.31	0.26	0.32	0.2967	3.9233	0.4267	-3.200898605	9.16E-16	2.09E-14	-0.524266569	0.710436961	0.980399641	LOW QUALITY PROTEIN: farnesyl pyrophosphate synthase 2 [Brassica rapa]	ko01100//Metabolic pathways;ko01110//Biosynthesis of secondary metabolites;ko00900//Terpenoid backbone biosynthesis	GO:0043231//intracellular membrane-bounded organelle;GO:0044444//cytoplasmic part	GO:0004659//prenyltransferase activity;GO:0043169//cation binding	GO:0006575//cellular modified amino acid metabolic process;GO:0006595//polyamine metabolic process;GO:0006637//acyl-CoA metabolic process;GO:0006720//isoprenoid metabolic process;GO:0006725//cellular aromatic compound metabolic process;GO:0006873//cellular ion homeostasis;GO:0006970//response to osmotic stress;GO:0006996//organelle organization;GO:0008203//cholesterol metabolic process;GO:0008654…
MSTRG.25727	--	0.16	0.14	0.14	1.37	1.61	4.09	0.15	0.17	0	0.1067	2.3567	0.1467	-4.006134786	0.000117766	0.000758969	-0.459431619	0.940378219	0.98723363	unnamed protein product [Brassica napus]	-	-	-	-
MSTRG.25756	--	0.2	0	0.09	2.94	3.51	15.77	0	0	0	0	7.4067	0.0967	-6.259662106	2.35E-07	2.40E-06	-6.594946589	0.595136571	0.980399641	BnaA06g35860D [Brassica napus]	-	-	-	-
MSTRG.25778	--	1.89	1.77	1.06	2.9	2.07	3	0.53	0.57	0.49	0.53	2.6567	1.5733	-0.755792865	0.770119454	0.921780539	-1.569760094	0.002075514	0.033534582	transcription factor VIP1-like [Brassica napus]	-	-	-	-
MSTRG.25796	GLC1	16	7.85	4.66	155.25	268.16	148.47	1.26	1.77	1.05	1.36	190.6267	9.5033	-4.326172508	1.14E-10	1.71E-09	-2.804826982	2.61E-09	2.04E-07	PREDICTED: major pollen allergen Ole e 10-like [Brassica oleracea var. oleracea] [Brassica oleracea]	-	GO:0005911//cell-cell junction;GO:0030312//external encapsulating structure	GO:0016798//hydrolase activity, acting on glycosyl bonds	GO:0010243//response to organonitrogen compound
MSTRG.26044	--	0	0	0	0.9	1.3	2.79	0	0	0	0	1.6633	0	-10.6998616	0.000244901	0.001477023	0	1	1	temperature-induced lipocalin-1 [Eutrema salsugineum]	-	-	-	-
MSTRG.26050	HST	13.76	15.06	19.44	5.57	5.7	5.08	18.54	17.35	19.47	18.4533	5.45	16.0867	1.56153728	3.28E-32	1.79E-30	0.198016027	0.001290558	0.022676336	PREDICTED: shikimate O-hydroxycinnamoyltransferase [Brassica oleracea var. oleracea] [Brassica oleracea]	ko01100//Metabolic pathways;ko01110//Biosynthesis of secondary metabolites;ko00940//Phenylpropanoid biosynthesis;ko00941//Flavonoid biosynthesis;ko00945//Stilbenoid, diarylheptanoid and gingerol biosynthesis	GO:0044444//cytoplasmic part	GO:0005488//binding;GO:0050737//O-hydroxycinnamoyltransferase activity	GO:0006605//protein targeting;GO:0006950//response to stress;GO:0009699//phenylpropanoid biosynthetic process;GO:0009891//positive regulation of biosynthetic process;GO:0043067//regulation of programmed cell death;GO:0048878//chemical homeostasis
MSTRG.26159	--	0.21	0	0.18	0.76	1.5	2.29	0	0.22	0	0.0733	1.5167	0.13	-3.544320516	0.00869694	0.034638083	-0.8259706	0.836324143	0.980399641	defensin-like protein 295 [Brassica rapa]	-	-	-	-
MSTRG.26297	--	0	0	0	1.27	3.79	5.91	0	0	0	0	3.6567	0	-11.8363134	5.47E-06	4.53E-05	0	1	1	pollen coat protein B3 [Brassica rapa]	-	-	-	-
MSTRG.2630	PLP3B	0	0.04	0.04	0.56	0.46	0.41	0.16	0.05	0	0.07	0.4767	0.0267	-4.159871337	0.007961827	0.032201535	1.392317423	0.421525662	0.939279977	PREDICTED: thioredoxin domain-containing protein PLP3A-like [Camelina sativa]	-	GO:0044424//intracellular part	GO:0015631//tubulin binding	GO:0006997//nucleus organization;GO:0016049//cell growth;GO:0030865//cortical cytoskeleton organization;GO:0048285//organelle fission;GO:1902410//mitotic cytokinetic process
MSTRG.26335	CLSY4	0.79	0.42	0.21	2.76	3.03	2.5	0.2	0.55	0.25	0.3333	2.7633	0.4733	-2.545481172	2.61E-07	2.64E-06	-0.50589093	0.78612523	0.980399641	SNF2 domain-containing protein CLASSY 4 isoform X1 [Brassica rapa]	ko03440//Homologous recombination	GO:0043231//intracellular membrane-bounded organelle	GO:0003676//nucleic acid binding;GO:0017111//nucleoside-triphosphatase activity;GO:0032550//purine ribonucleoside binding	GO:0007154//cell communication;GO:0016571//histone methylation;GO:0030422//production of siRNA involved in RNA interference;GO:0045087//innate immune response;GO:0048580//regulation of post-embryonic development
MSTRG.26364	--	0.59	0.58	0.51	0.12	0.15	0.1	0.31	0.21	0.07	0.1967	0.1233	0.56	2.182864057	0.002142385	0.010320817	-1.509674373	0.216038564	0.75192026	-	-	-	-	-
MSTRG.26419	ufaA1	2.88	3.23	2.95	1	0.68	1	5.74	6.65	5.84	6.0767	0.8933	3.02	1.75727805	3.24E-28	1.50E-26	1.008731606	4.68E-22	1.90E-19	BnaCnng54600D [Brassica napus]	-	-	GO:0008757//S-adenosylmethionine-dependent methyltransferase activity	GO:0006629//lipid metabolic process
MSTRG.26489	--	1.07	1.34	1.29	0.14	0	0	2.42	1.3	1.92	1.88	0.0467	1.2333	4.724026538	6.77E-06	5.52E-05	0.608169892	0.055419446	0.369145811	HR-like lesion-inducing protein [Arabidopsis thaliana]	-	-	-	-
MSTRG.26564	OBAP2C	0.33	0.2	0.96	0	0	0	0.31	1.3	0.67	0.76	0	0.4967	8.956134115	0.002893785	0.013392172	0.613721494	0.374170306	0.91085553	PREDICTED: oil body-associated protein 2C [Raphanus sativus]	-	GO:0043231//intracellular membrane-bounded organelle	GO:0003824//catalytic activity;GO:0005488//binding	-
MSTRG.26637	NDX1	2.49	2.53	2.39	4.18	3.16	3.38	0.69	0.78	0.78	0.75	3.5733	2.47	-0.532759458	0.64515126	0.858105894	-1.719548541	1.02E-05	0.000362869	protein NEOXANTHIN-DEFICIENT 1 isoform X4 [Brassica rapa]	-	GO:0043231//intracellular membrane-bounded organelle	-	GO:0006779//porphyrin-containing compound biosynthetic process
MSTRG.26789	--	0.05	0.08	0.18	0	0.02	0	0.13	0.07	0.02	0.0733	0.0067	0.1033	3.95419631	0.008142527	0.032787927	-0.494764692	0.917592533	0.98220648	BnaC05g19740D [Brassica napus]	-	-	-	-
MSTRG.26891	MBD8	1.5	0.9	1.14	2.8	3.17	3.22	0.95	0.65	0.67	0.7567	3.0633	1.18	-1.376315501	0.007538846	0.030718294	-0.641057063	0.461608028	0.963094185	LOW QUALITY PROTEIN: methyl-CpG-binding domain-containing protein 8 [Brassica rapa]	-	GO:0043231//intracellular membrane-bounded organelle	GO:0005488//binding	-
MSTRG.26927	--	1.48	1.97	1.93	1.59	1.63	1.6	0.28	0.63	0.63	0.5133	1.6067	1.7933	0.158573026	0.01049923	0.040657141	-1.804675822	0.001201633	0.021331746	vacuolar protein sorting-associated protein 35A-like [Brassica napus]	-	-	-	-
MSTRG.26940	--	13.33	14.84	12.94	5.24	4.79	4.29	14.56	12.94	11.79	13.0967	4.7733	13.7033	1.521457879	3.07E-45	2.70E-43	-0.065327204	0.056652631	0.374600494	unnamed protein product, partial [Brassica rapa]	-	-	-	-
MSTRG.2720	--	3.58	3.52	2.76	0.79	0.3	0.46	0.54	1.02	0.1	0.5533	0.5167	3.2867	2.669319431	5.98E-22	2.00E-20	-2.570404405	4.96E-06	0.000189446	pollen receptor-like kinase 5 [Brassica napus]	-	-	-	-
MSTRG.27235	PHB1	0.38	0.69	0.64	0	0	0	0.39	0.56	0.65	0.5333	0	0.57	9.154818109	3.46E-08	3.95E-07	-0.09592442	0.657677054	0.980399641	PREDICTED: prohibitin-1, mitochondrial-like [Raphanus sativus]	-	GO:0009536//plastid;GO:0030312//external encapsulating structure;GO:0031224//intrinsic component of membrane;GO:0044455//mitochondrial membrane part	-	GO:0003006//developmental process involved in reproduction;GO:0006997//nucleus organization;GO:0009117//nucleotide metabolic process;GO:0019941//modification-dependent protein catabolic process;GO:0035966//response to topologically incorrect protein;GO:0043094//cellular metabolic compound salvage;GO:0043248//proteasome assembly
MSTRG.27290	PYRE-F	1.65	2.03	1.54	1.3	1.23	1.74	0.4	0.5	0.48	0.46	1.4233	1.74	0.289813737	0.002836188	0.013173049	-1.91938154	0.000324252	0.007226886	uridine 5'-monophosphate synthase [Eutrema salsugineum]	ko01100//Metabolic pathways;ko00240//Pyrimidine metabolism	GO:0044444//cytoplasmic part	GO:0016763//transferase activity, transferring pentosyl groups;GO:0016831//carboxy-lyase activity	GO:0006222//UMP biosynthetic process;GO:0019856//pyrimidine nucleobase biosynthetic process
MSTRG.27359	--	0.31	0.34	0.2	0	0	0	0.74	0.83	0	0.5233	0	0.2833	8.14635653	0.004885156	0.021120976	0.885229813	0.302308924	0.850724676	hypothetical protein N665_4726s0001 [Sinapis alba]	-	-	-	-
MSTRG.2736	PTAC10	3.28	4.01	2.58	8.76	8.23	9.46	2.19	2.31	2.37	2.29	8.8167	3.29	-1.422145733	8.99E-06	7.17E-05	-0.522739986	0.39067716	0.920903151	protein PLASTID TRANSCRIPTIONALLY ACTIVE 10 [Brassica rapa]	-	GO:0000229//cytoplasmic chromosome;GO:0009532//plastid stroma	GO:0003676//nucleic acid binding	GO:0006355//regulation of transcription, DNA-templated
MSTRG.27507	LNK2	2.07	2.19	2.48	0.91	1.36	0.87	1.88	2	1.73	1.87	1.0467	2.2467	1.101984032	9.73E-12	1.61E-10	-0.264747821	0.751227235	0.980399641	protein LNK2 isoform X1 [Brassica rapa]	-	-	-	-
MSTRG.27511	H2AV	0.07	0.12	0	1.14	1.99	1.68	0	0	0	0	1.6033	0.0633	-4.66196557	9.68E-05	0.000633649	-5.984893108	0.613318757	0.980399641	histone H2A variant 1 isoform X1 [Brassica napus]	-	GO:0043231//intracellular membrane-bounded organelle;GO:0043232//intracellular non-membrane-bounded organelle	GO:0003676//nucleic acid binding;GO:0046983//protein dimerization activity	-
MSTRG.27519	GATA8	0.22	0.24	0.05	1.93	1.21	1.82	0.21	0.38	0.08	0.2233	1.6533	0.17	-3.281770968	2.03E-06	1.80E-05	0.393663848	0.428737157	0.942859829	GATA transcription factor 8 [Brassica rapa]	-	GO:0043231//intracellular membrane-bounded organelle	GO:0003677//DNA binding;GO:0046914//transition metal ion binding	GO:0006355//regulation of transcription, DNA-templated;GO:0044707//single-multicellular organism process;GO:0048511//rhythmic process
MSTRG.27600	LCR52	0.59	0.43	0.34	0.09	0	0	0.09	0.63	0.69	0.47	0.03	0.4533	3.91753784	0.005299903	0.022652708	0.052088511	0.717926763	0.980399641	BnaCnng13530D [Brassica napus]	-	-	-	-
MSTRG.27601	LCR30	0.12	0	0	0.11	0.86	7.09	0	0	0	0	2.6867	0.04	-6.069673528	0.002168519	0.010425536	-5.321928095	0.713805204	0.980399641	BnaCnng13610D [Brassica napus]	-	-	-	-
MSTRG.27682	UXS2	0.22	0.1	0.1	1.29	1.22	1.1	0.05	0.21	0.06	0.1067	1.2033	0.14	-3.103537604	9.33E-06	7.42E-05	-0.392317423	0.941437428	0.987327966	NAD(P)-binding domain superfamily [Arabidopsis thaliana x Arabidopsis arenosa]	ko01100//Metabolic pathways;ko00520//Amino sugar and nucleotide sugar metabolism	GO:0000139//Golgi membrane;GO:0031224//intrinsic component of membrane;GO:0031984//organelle subcompartment	GO:0016831//carboxy-lyase activity;GO:0016836//hydro-lyase activity;GO:0048037//cofactor binding	GO:0009226//nucleotide-sugar biosynthetic process;GO:0019321//pentose metabolic process
MSTRG.2788	--	1.92	1.46	1.52	43.32	73.55	40.44	0.09	0.49	0.18	0.2533	52.4367	1.6333	-5.004684825	4.64E-43	3.87E-41	-2.688710426	0.00429325	0.060128128	BnaA06g16030D [Brassica napus]	-	-	-	-
MSTRG.28035	--	1.07	1.14	0.75	3.38	3.34	2.96	0.49	0.55	0.4	0.48	3.2267	0.9867	-1.709409872	5.83E-05	0.000399938	-1.039528364	0.094433471	0.504065359	BnaC07g12260D [Brassica napus]	-	GO:1902562//H4 histone acetyltransferase complex	-	GO:0010468//regulation of gene expression
MSTRG.28077	RPL10A	1.46	1.47	2.13	5.29	5.59	5.86	1.09	1.6	1.27	1.32	5.58	1.6867	-1.726090238	6.29E-05	0.000428129	-0.353636955	0.922064787	0.983104889	PREDICTED: 60S ribosomal protein L10-1 [Brassica oleracea var. oleracea] [Brassica oleracea]	ko03010//Ribosome	GO:0009526//plastid envelope;GO:0015934//large ribosomal subunit;GO:0031090//organelle membrane	GO:0005198//structural molecule activity	GO:0009411//response to UV;GO:0009451//RNA modification;GO:0010467//gene expression
MSTRG.28086	PATL1	0.07	0.19	0.17	1.73	1.82	1.91	0.02	0	0.1	0.04	1.82	0.1433	-3.666492386	1.78E-10	2.61E-09	-1.841302254	0.249180348	0.794146512	patellin-1-like [Brassica napus]	-	GO:0005576//extracellular region;GO:0005911//cell-cell junction;GO:0009536//plastid;GO:0031224//intrinsic component of membrane	GO:0019899//enzyme binding	GO:0000904//cell morphogenesis involved in differentiation;GO:0006090//pyruvate metabolic process;GO:0006970//response to osmotic stress;GO:0006996//organelle organization;GO:0010038//response to metal ion;GO:0042044//fluid transport;GO:0048588//developmental cell growth
MSTRG.28101	CYP709B1	18.22	22.88	15.86	59.43	78.54	46.87	11.55	17.23	12.2	13.66	61.6133	18.9867	-1.698255943	1.86E-08	2.19E-07	-0.475029162	0.398414849	0.926912867	LOW QUALITY PROTEIN: cytochrome P450 709B1 [Brassica rapa]	-	-	GO:0016491//oxidoreductase activity;GO:0046906//tetrapyrrole binding;GO:0046914//transition metal ion binding	GO:0044710//single-organism metabolic process
MSTRG.28223	PAT22	0.2	0.16	0.09	0.94	0.9	0.81	0.06	0.06	0.14	0.0867	0.8833	0.15	-2.557995453	0.000117352	0.000756536	-0.791413378	0.644276544	0.980399641	probable protein S-acyltransferase 22 [Brassica napus]	-	GO:0016020//membrane	GO:0016740//transferase activity	GO:0009987//cellular process;GO:0071840//cellular component organization or biogenesis
MSTRG.28235	At1g68905	0	0	0	0.93	2.71	3.08	0	0	0	0	2.24	0	-11.12928302	1.07E-05	8.44E-05	0	1	1	BnaCnng48430D [Brassica napus]	-	-	-	-
MSTRG.28239	--	0.27	0.47	0.23	1.63	1.76	1.97	1.27	0.57	0.54	0.7933	1.7867	0.3233	-2.466176348	0.010100548	0.039357276	1.294904921	0.068737283	0.419707865	marker for oxidative stress response protein [Arabidopsis thaliana]	-	GO:0043231//intracellular membrane-bounded organelle	-	GO:0006950//response to stress
MSTRG.28419	RPS6	0.67	0.53	0.59	1.79	2.03	1.85	0.51	0.3	0.21	0.34	1.89	0.5967	-1.663389148	2.53E-06	2.22E-05	-0.811390435	0.245249903	0.788807432	disease resistance protein [Brassica rapa subsp. pekinensis] [Brassica rapa]	-	GO:0005911//cell-cell junction;GO:0044424//intracellular part	GO:0036094//small molecule binding;GO:0097159//organic cyclic compound binding;GO:1901363//heterocyclic compound binding	GO:0050832//defense response to fungus
MSTRG.28434	At3g47570	1.82	2.14	1.4	0.46	0.61	0.56	2.28	1.76	1.67	1.9033	0.5433	1.7867	1.717361036	1.61E-08	1.91E-07	0.091257745	0.212138645	0.745676051	BnaC03g74420D [Brassica napus]	-	-	-	-
MSTRG.28454	--	8.22	9.12	6.7	6.7	8.09	7.49	3.72	2.79	4.23	3.58	7.4267	8.0133	0.109687663	0.00019718	0.00121662	-1.162442903	0.001137117	0.020383091	BnaCnng55650D [Brassica napus]	-	-	-	-
MSTRG.2850	--	1.87	1.47	0.89	0	0	0	1.78	1.78	1.64	1.7333	0	1.41	10.46147945	2.84E-08	3.27E-07	0.29785396	0.176371401	0.686585877	LOW QUALITY PROTEIN: hypothetical protein HID58_013523 [Brassica napus]	-	-	-	-
MSTRG.28536	--	10.69	10.49	12.15	2.77	2.59	2.53	11.55	12.21	11.36	11.7067	2.63	11.11	2.078724112	2.38E-52	2.50E-50	0.075471527	0.004386001	0.061182859	Reverse transcriptase domain [Arabidopsis suecica]	-	-	-	-
MSTRG.28543	BBR	1.44	2.07	2.03	0.74	0.32	0.64	1.82	1.82	2.08	1.9067	0.5667	1.8467	1.70435123	1.36E-06	1.24E-05	0.046129171	0.319053712	0.866009188	E3 ubiquitin ligase BIG BROTHER-related-like [Brassica napus]	-	-	-	-
MSTRG.28552	XYL1	0.67	0.38	0.38	42.41	43.16	41.72	0.08	0.04	0.09	0.07	42.43	0.4767	-6.475960127	1.11E-255	1.57E-252	-2.767553914	9.62E-05	0.002562248	alpha-xylosidase 1 [Brassica rapa]	-	GO:0005576//extracellular region;GO:0005618//cell wall;GO:0005911//cell-cell junction;GO:0009536//plastid	GO:0005488//binding;GO:0090599//alpha-glucosidase activity;GO:0097599//xylanase activity	GO:0000272//polysaccharide catabolic process;GO:0006073//cellular glucan metabolic process;GO:0010038//response to metal ion;GO:0042546//cell wall biogenesis;GO:0071555//cell wall organization
MSTRG.29116	AFP2	0.16	0.04	0.46	0	0	0.01	3.75	1.69	4.05	3.1633	0.0033	0.22	6.044394119	0.000282911	0.001682224	3.845870158	1.01E-05	0.000360099	PREDICTED: defensin-like protein 1 [Brassica oleracea var. oleracea] [Brassica oleracea]	ko04016//MAPK signaling pathway - plant	GO:0030312//external encapsulating structure	-	GO:0000160//phosphorelay signal transduction system;GO:0001906//cell killing;GO:0009611//response to wounding;GO:0009620//response to fungus;GO:0009685//gibberellin metabolic process;GO:0010476//gibberellin mediated signaling pathway;GO:0042742//defense response to bacterium
MSTRG.2914	--	19.26	18.07	19.83	2.65	2.2	2.75	29.28	27.52	26.43	27.7433	2.5333	19.0533	2.910934593	1.74E-65	2.42E-63	0.542097721	1.41E-10	1.42E-08	BnaA03g56700D [Brassica napus]	-	-	-	-
MSTRG.29156	--	0.57	0.81	0.79	3.3	5.39	6.61	0.84	0.62	0.34	0.6	5.1	0.7233	-2.817764705	2.56E-06	2.24E-05	-0.269698136	0.958068803	0.991462377	LOW QUALITY PROTEIN: protein indeterminate-domain 6, chloroplastic-like [Brassica rapa]	-	-	-	-
MSTRG.29157	--	0	0	0.12	0.07	0.32	3.91	0	0	0	0	1.4333	0.04	-5.163230349	0.010296797	0.039990019	-5.321928095	0.733976684	0.980399641	PREDICTED: protein indeterminate-domain 6, chloroplastic-like [Brassica oleracea var. oleracea] [Brassica oleracea]	-	-	-	-
MSTRG.29207	CP33	1.69	1.79	1.13	0	0.15	0.75	1.15	0.71	1.23	1.03	0.3	1.5367	2.356769844	0.000555086	0.00309363	-0.577159913	0.598671738	0.980399641	RNA-binding protein CP33, chloroplastic [Brassica napus]	-	GO:0009532//plastid stroma;GO:0030529//intracellular ribonucleoprotein complex;GO:0044423//virion part	GO:0003676//nucleic acid binding	GO:0003006//developmental process involved in reproduction;GO:0006090//pyruvate metabolic process;GO:0006396//RNA processing;GO:0009058//biosynthetic process;GO:0009668//plastid membrane organization
MSTRG.29331	--	1.42	1.29	0.87	0.35	0.11	0.44	0.77	1.02	1.23	1.0067	0.3	1.1933	1.991962681	9.35E-08	1.01E-06	-0.245411038	0.775160204	0.980399641	Leucine-rich repeat [Arabidopsis suecica]	-	-	-	-
MSTRG.29399	--	0.08	0	0	1.35	0.94	0.91	0.07	0	0	0.0233	1.0667	0.0267	-5.321928095	0.001020201	0.005336588	-0.192645078	0.909332348	0.980399641	unnamed protein product [Brassica napus]	-	-	-	-
MSTRG.29414	--	0	0	0	0.17	0.61	0.45	0	0	0	0	0.41	0	-8.6794801	0.010222372	0.03975827	0	1	1	BnaC09g17300D [Brassica napus]	-	-	-	-
MSTRG.29494	CP33	0.42	0.89	1.54	0.61	0.34	0.4	0.97	1.76	1.1	1.2767	0.45	0.95	1.078002512	0.004633137	0.020187032	0.426382473	0.157779569	0.651659188	RNA-binding protein CP33, chloroplastic [Brassica napus]	-	GO:0009532//plastid stroma;GO:0030529//intracellular ribonucleoprotein complex;GO:0044423//virion part	GO:0003676//nucleic acid binding	GO:0003006//developmental process involved in reproduction;GO:0006090//pyruvate metabolic process;GO:0006396//RNA processing;GO:0009058//biosynthetic process;GO:0009668//plastid membrane organization
MSTRG.29549	GRF9	0.07	0	0.15	0.43	1.03	0.78	0	0	0	0	0.7467	0.0733	-3.347923303	0.001280739	0.006537346	-6.196397213	0.389478988	0.919824059	BnaC05g48170D [Brassica napus]	-	GO:0009532//plastid stroma;GO:0016020//membrane	GO:0046872//metal ion binding;GO:0051219//phosphoprotein binding	GO:0000097//sulfur amino acid biosynthetic process;GO:0006090//pyruvate metabolic process;GO:0006970//response to osmotic stress;GO:0006996//organelle organization;GO:0008104//protein localization;GO:0009746//response to hexose;GO:0009791//post-embryonic development;GO:0010038//response to metal ion;GO:0042044//fluid transport;GO:0042743//hydrogen peroxide metabolic process;GO:0048827//phyllome d…
MSTRG.29556	--	0.68	0.1	0	0.62	2.32	10.27	0	0	0	0	4.4033	0.26	-4.082012532	0.003142599	0.014397706	-8.022367813	0.258720122	0.805067587	PREDICTED: defensin-like protein 275 [Camelina sativa]	-	-	-	-
MSTRG.29604	GGAT1	0.49	0.63	0.4	1.44	2.06	2.14	0.03	0.46	0.2	0.23	1.88	0.5067	-1.891623839	0.001152378	0.005947176	-1.139403057	0.29467948	0.844415424	PREDICTED: RNA-binding protein 24-like [Brassica oleracea var. oleracea] [Brassica oleracea]	-	GO:0005576//extracellular region;GO:0009536//plastid	GO:0003676//nucleic acid binding;GO:0008483//transaminase activity;GO:0016755//transferase activity, transferring amino-acyl groups	GO:0006520//cellular amino acid metabolic process;GO:0006790//sulfur compound metabolic process;GO:0006950//response to stress;GO:0044249//cellular biosynthetic process;GO:0044283//small molecule biosynthetic process;GO:0044712//single-organism catabolic process;GO:1901575//organic substance catabolic process;GO:1901576//organic substance biosynthetic process
MSTRG.29682	PLDALPHA2	0.06	0.03	0	0.48	0.33	0.71	0.16	0.04	0.03	0.0767	0.5067	0.03	-4.078002512	0.003182491	0.014559707	1.353636955	0.359720204	0.90165099	PREDICTED: phospholipase D alpha 2-like [Brassica oleracea var. oleracea] [Brassica oleracea]	ko01100//Metabolic pathways;ko01110//Biosynthesis of secondary metabolites;ko04144//Endocytosis;ko00564//Glycerophospholipid metabolism;ko00565//Ether lipid metabolism	GO:0005911//cell-cell junction;GO:0009536//plastid;GO:0016020//membrane;GO:0030135//coated vesicle	GO:0004620//phospholipase activity;GO:0046872//metal ion binding;GO:1902936//phosphatidylinositol bisphosphate binding	GO:0000160//phosphorelay signal transduction system;GO:0006006//glucose metabolic process;GO:0006090//pyruvate metabolic process;GO:0006650//glycerophospholipid metabolic process;GO:0006970//response to osmotic stress;GO:0006996//organelle organization;GO:0009787//regulation of abscisic acid-activated signaling pathway;GO:0010038//response to metal ion;GO:0042044//fluid transport;GO:0044707//sing…
MSTRG.29749	mnmA	0.43	0.4	0.44	1.4	1.25	1.26	0.45	0.6	0.53	0.5267	1.3033	0.4233	-1.622340111	0.003061088	0.014071338	0.315096061	0.1305868	0.593371144	tRNA-specific 2-thiouridylase MnmA [Brassica rapa]	-	GO:0044424//intracellular part	GO:0016741//transferase activity, transferring one-carbon groups;GO:0016782//transferase activity, transferring sulfur-containing groups	GO:0001510//RNA methylation;GO:0006399//tRNA metabolic process
MSTRG.29806	--	1.37	1.22	0.54	0.81	0.37	0.16	1.26	0.76	0.49	0.8367	0.4467	1.0433	1.223929656	0.006876778	0.028383315	-0.318475293	0.956783001	0.991244003	mitochondrial thiamine pyrophosphate carrier 1-like [Brassica napus]	-	-	-	-
MSTRG.29809	--	3.86	4.63	5.03	1.28	1.16	1.65	1.31	2.98	4.72	3.0033	1.3633	4.5067	1.724922403	2.25E-14	4.63E-13	-0.58549614	0.530040296	0.980399641	BnaA08g03160D [Brassica napus]	-	-	-	-
MSTRG.29854	CEP9	2.47	0.06	0	64.69	298.52	129.1	0	0	0	0	164.1033	0.8433	-7.604285849	0.000205012	0.001259177	-9.719959169	0.142902013	0.620676924	DNA-directed RNA polymerase 3, chloroplastic-like [Brassica napus]	-	-	-	-
MSTRG.29870	At4g26390	0.91	0.87	0.6	2.52	1.98	1.67	0.13	0.24	0.41	0.26	2.0567	0.7933	-1.374308916	0.012371286	0.046804383	-1.609415544	0.012185043	0.131998109	BnaA10g10590D [Brassica napus]	ko01100//Metabolic pathways;ko01110//Biosynthesis of secondary metabolites;ko01200//Carbon metabolism;ko01230//Biosynthesis of amino acids;ko00230//Purine metabolism;ko00010//Glycolysis / Gluconeogenesis;ko00620//Pyruvate metabolism	GO:0044444//cytoplasmic part	GO:0016301//kinase activity;GO:0031420//alkali metal ion binding;GO:0032550//purine ribonucleoside binding	GO:0006006//glucose metabolic process;GO:0006090//pyruvate metabolic process;GO:0006796//phosphate-containing compound metabolic process;GO:0006996//organelle organization;GO:0046942//carboxylic acid transport;GO:0051603//proteolysis involved in cellular protein catabolic process
MSTRG.29907	--	0	0	0	0.61	5.32	1.47	0	0	0	0	2.4667	0	-11.26834705	0.000485007	0.002737949	0	1	1	defensin-like protein 78 [Arabidopsis lyrata subsp. lyrata] [Arabidopsis lyrata]	-	-	-	-
MSTRG.29939	--	0.3	0.2	0.13	1.69	6.13	2.39	0	0.08	0	0.0267	3.4033	0.21	-4.018487227	1.25E-05	9.73E-05	-2.977279923	0.192066475	0.715710623	BnaA08g03760D [Brassica napus]	-	GO:0016020//membrane	-	-
MSTRG.30001	RHG1A	3.37	4.14	3.42	8.03	8.96	8	2.46	2.57	2.76	2.5967	8.33	3.6433	-1.1930575	7.94E-05	0.00052926	-0.488598168	0.378310643	0.914450087	probable E3 ubiquitin-protein ligase RHG1A [Brassica rapa]	-	-	-	-
MSTRG.30035	--	0.12	0.11	0.05	1.93	1.51	1.54	0	0.2	0.12	0.1067	1.66	0.0933	-4.15264701	4.02E-05	0.000284027	0.192645078	0.774763426	0.980399641	hypothetical protein F2Q68_00032914 [Brassica cretica]	-	-	-	-
MSTRG.30059	SKS1	0.79	1.24	1.38	0	0.19	0.07	1.5	1.02	1.66	1.3933	0.0867	1.1367	3.713188211	1.32E-06	1.21E-05	0.293731203	0.222139833	0.760312666	monocopper oxidase-like protein SKS1 [Brassica rapa]	-	GO:0005576//extracellular region;GO:0005618//cell wall;GO:0005911//cell-cell junction;GO:0031090//organelle membrane;GO:0031225//anchored component of membrane;GO:0044444//cytoplasmic part	-	GO:0005976//polysaccharide metabolic process;GO:0009826//unidimensional cell growth;GO:0010053//root epidermal cell differentiation;GO:0044711//single-organism biosynthetic process;GO:0048468//cell development
MSTRG.30126	--	12.51	13.34	10.6	3.57	2.18	2.8	9.11	9.7	8.08	8.9633	2.85	12.15	2.091922489	1.25E-45	1.12E-43	-0.438849059	0.426154471	0.941957425	-	-	-	-	-
MSTRG.30141	--	0.36	0.16	0.19	0.28	0.3	0.22	0.83	0.4	0.84	0.69	0.2667	0.2367	-0.172180975	0.537562359	0.787334716	1.543739838	0.001395627	0.024194745	BnaAnng11290D [Brassica napus]	-	GO:0009536//plastid	-	GO:0003006//developmental process involved in reproduction
MSTRG.30262	OEP162	0.32	0.25	0.49	0	0	0	0.96	0.26	0.57	0.5967	0	0.3533	8.464886049	1.76E-05	0.000132904	0.755895323	0.130587848	0.593371144	PREDICTED: outer envelope pore protein 16-2, chloroplastic isoform X1 [Raphanus sativus]	-	GO:0031355//integral component of plastid outer membrane	GO:0008320//protein transmembrane transporter activity;GO:0022829//wide pore channel activity;GO:0046943//carboxylic acid transmembrane transporter activity	GO:0015031//protein transport
MSTRG.30463	At5g05200	1.04	1.11	1.08	0.42	0.55	0.61	0.93	1.69	1.34	1.32	0.5267	1.0767	1.031609607	0.000180189	0.001121445	0.293966265	0.126892056	0.585773801	PREDICTED: uncharacterized aarF domain-containing protein kinase At5g05200, chloroplastic [Brassica oleracea var. oleracea] [Brassica oleracea]	-	GO:0044434//chloroplast part	-	GO:0044237//cellular metabolic process;GO:0044238//primary metabolic process;GO:0044710//single-organism metabolic process;GO:0044763//single-organism cellular process;GO:0071704//organic substance metabolic process
MSTRG.30551	--	18.36	18.63	11.47	6.01	3.68	3.85	4.96	7.49	4.12	5.5233	4.5133	16.1533	1.839566666	2.75E-21	8.88E-20	-1.548220802	2.36E-06	9.79E-05	unnamed protein product, partial [Brassica rapa]	-	-	-	-
MSTRG.30590	--	0.75	0.83	1.11	9.89	9.87	10.41	0.32	0.45	0.42	0.3967	10.0567	0.8967	-3.487436619	1.09E-54	1.20E-52	-1.176644599	0.017496332	0.172160774	Harbinger transposase-derived protein [Arabidopsis thaliana x Arabidopsis arenosa]	-	-	-	-
MSTRG.3073	GLP8	6.57	5.96	6.68	2.12	1.94	1.89	5.62	6.5	6.42	6.18	1.9833	6.4033	1.690895945	1.60E-38	1.13E-36	-0.051216275	0.069782922	0.423547432	germin-like protein subfamily 2 member 3 [Brassica rapa]	-	GO:0005576//extracellular region	GO:0003824//catalytic activity;GO:0046914//transition metal ion binding	GO:0006928//movement of cell or subcellular component;GO:0044710//single-organism metabolic process
MSTRG.30733	--	1.92	1.46	1.17	4.36	2.4	4.46	0.21	0.38	0.34	0.31	3.74	1.5167	-1.302134226	0.085346578	0.224752222	-2.290563924	0.000991961	0.018278044	hypothetical protein IGI04_036652 [Brassica rapa subsp. trilocularis] [Brassica rapa]	-	-	-	-
MSTRG.30738	--	1.7	0.95	0.86	1.46	2.03	2.21	0.29	0.32	0.14	0.25	1.9	1.17	-0.699490889	0.842689571	0.944172175	-2.22650853	0.00120307	0.021352465	hypothetical protein IGI04_040399 [Brassica rapa subsp. trilocularis] [Brassica rapa]	-	-	-	-
MSTRG.30739	--	1.04	0.98	0.41	0.51	0.34	1.01	0.04	0	0.04	0.0267	0.62	0.81	0.385653692	0.082861773	0.219734672	-4.924812504	1.89E-05	0.000622221	hypothetical protein IGI04_042624, partial [Brassica rapa subsp. trilocularis] [Brassica rapa]	-	-	-	-
MSTRG.30740	--	0.3	0.27	0.11	1.29	0.85	2.06	0.15	0.13	0.1	0.1267	1.4	0.2267	-2.626782676	0.008869247	0.035200168	-0.839535328	0.788516925	0.980399641	hypothetical protein IGI04_042624, partial [Brassica rapa subsp. trilocularis] [Brassica rapa]	-	-	-	-
MSTRG.30775	--	0	0	0	0.06	0.31	1.53	0	0	0	0	0.6333	0	-9.306821202	0.00781785	0.031689793	0	1	1	thionin-like protein 2 [Rosa chinensis]	-	-	-	-
MSTRG.30797	RPN2	2.73	2.86	3.15	1.17	1.06	0.82	1.54	2.57	1.96	2.0233	1.0167	2.9133	1.518824037	1.03E-17	2.68E-16	-0.525936763	0.412974559	0.935426212	dolichyl-diphosphooligosaccharide--protein glycosyltransferase subunit 2-like [Brassica napus]	ko01100//Metabolic pathways;ko04141//Protein processing in endoplasmic reticulum;ko00510//N-Glycan biosynthesis	GO:0005618//cell wall;GO:0005911//cell-cell junction;GO:0031090//organelle membrane;GO:0031224//intrinsic component of membrane;GO:0043231//intracellular membrane-bounded organelle	GO:0016757//transferase activity, transferring glycosyl groups	GO:0006487//protein N-linked glycosylation;GO:0006950//response to stress;GO:0016072//rRNA metabolic process;GO:0030243//cellulose metabolic process
MSTRG.30828	BGLU3	4.64	4.04	4.73	0.05	0.02	0.08	7.41	7.12	6.65	7.06	0.05	4.47	6.482202926	3.00E-37	2.02E-35	0.659393352	1.49E-10	1.49E-08	beta-glucosidase 3 isoform X1 [Brassica rapa]	ko01100//Metabolic pathways;ko01110//Biosynthesis of secondary metabolites;ko00940//Phenylpropanoid biosynthesis;ko00500//Starch and sucrose metabolism;ko00460//Cyanoamino acid metabolism	GO:0043231//intracellular membrane-bounded organelle	GO:0016798//hydrolase activity, acting on glycosyl bonds	GO:0009608//response to symbiont;GO:0009812//flavonoid metabolic process
MSTRG.30848	At5g42232	0.2	0	0.23	3.22	6.15	1.95	0.06	0	0	0.02	3.7733	0.1433	-4.718393488	5.58E-07	5.39E-06	-2.841302254	0.352315656	0.89600399	BnaCnng23100D [Brassica napus]	-	-	-	-
MSTRG.30967	At4g31860	4.06	4	3.63	1.19	1.15	1.26	2.95	3.04	2.57	2.8533	1.2	3.8967	1.699206118	3.26E-43	2.73E-41	-0.449592228	0.63527078	0.980399641	BnaC03g67240D [Brassica napus]	-	GO:0016020//membrane	GO:0016787//hydrolase activity	GO:0031668//cellular response to extracellular stimulus;GO:0033554//cellular response to stress;GO:0044237//cellular metabolic process;GO:0044238//primary metabolic process;GO:0071704//organic substance metabolic process
MSTRG.30977	REM17	6.34	6.62	5.17	2.19	1.61	1.85	3.88	6.11	3.37	4.4533	1.8833	6.0433	1.682056152	1.84E-31	9.75E-30	-0.440458917	0.621945473	0.980399641	BnaA08g12400D [Brassica napus]	-	-	-	-
MSTRG.30990	--	3	3.16	2.02	9.09	8.5	4.83	1.06	1.35	0.69	1.0333	7.4733	2.7267	-1.45461353	0.001170083	0.006027391	-1.399832628	8.46E-05	0.002293514	BnaA07g03900D [Brassica napus]	-	-	-	-
MSTRG.31125	--	0.36	0.2	0.28	1.05	1.27	1.05	0.23	0.24	0.19	0.22	1.1233	0.28	-2.004287358	0.005840067	0.024640006	-0.347923303	0.984420827	0.996646122	BnaA09g28540D [Brassica napus]	-	-	-	-
MSTRG.31164	PXG1	16.06	16.32	17.23	0	0	0	20.89	21.92	19.67	20.8267	0	16.5367	14.01338084	4.49E-22	1.51E-20	0.332763496	1.02E-06	4.64E-05	PREDICTED: peroxygenase 1 [Brassica oleracea var. oleracea] [Brassica oleracea]	ko00073//Cutin, suberine and wax biosynthesis	GO:0009532//plastid stroma;GO:0031224//intrinsic component of membrane;GO:0043232//intracellular non-membrane-bounded organelle	GO:0004497//monooxygenase activity;GO:0008374//O-acyltransferase activity;GO:0016684//oxidoreductase activity, acting on peroxide as acceptor;GO:0016705//oxidoreductase activity, acting on paired donors, with incorporation or reduction of molecular oxygen;GO:0046872//metal ion binding	GO:0001101//response to acid chemical;GO:0006090//pyruvate metabolic process;GO:0006633//fatty acid biosynthetic process;GO:0006779//porphyrin-containing compound biosynthetic process;GO:0006996//organelle organization;GO:0009409//response to cold;GO:0009639//response to red or far red light;GO:0009756//carbohydrate mediated signaling;GO:0009793//embryo development ending in seed dormancy;GO:0016…
MSTRG.31165	PXG1	10.94	9.13	7.48	0	0	0	12.83	11.71	12.09	12.21	0	9.1833	13.1648022	1.86E-17	4.76E-16	0.410973382	0.000242825	0.005659144	PREDICTED: peroxygenase 1-like [Raphanus sativus]	ko00073//Cutin, suberine and wax biosynthesis	GO:0009532//plastid stroma;GO:0031224//intrinsic component of membrane;GO:0043232//intracellular non-membrane-bounded organelle	GO:0004497//monooxygenase activity;GO:0008374//O-acyltransferase activity;GO:0016684//oxidoreductase activity, acting on peroxide as acceptor;GO:0016705//oxidoreductase activity, acting on paired donors, with incorporation or reduction of molecular oxygen;GO:0046872//metal ion binding	GO:0001101//response to acid chemical;GO:0006090//pyruvate metabolic process;GO:0006633//fatty acid biosynthetic process;GO:0006779//porphyrin-containing compound biosynthetic process;GO:0006996//organelle organization;GO:0009409//response to cold;GO:0009639//response to red or far red light;GO:0009756//carbohydrate mediated signaling;GO:0009793//embryo development ending in seed dormancy;GO:0016…
MSTRG.31232	HSP70-6	4.38	4.06	3.72	13.77	15.76	12.77	2.41	2.59	2.4	2.4667	14.1	4.0533	-1.798514435	1.66E-17	4.27E-16	-0.716546053	0.024738578	0.218895746	heat shock 70 kDa protein 6, chloroplastic [Brassica rapa]	ko04141//Protein processing in endoplasmic reticulum;ko03040//Spliceosome;ko04144//Endocytosis	GO:0009526//plastid envelope;GO:0009532//plastid stroma	GO:0005515//protein binding;GO:0016628//oxidoreductase activity, acting on the CH-CH group of donors, NAD or NADP as acceptor;GO:0032550//purine ribonucleoside binding	GO:0003006//developmental process involved in reproduction;GO:0006605//protein targeting;GO:0006950//response to stress;GO:0009657//plastid organization;GO:0010038//response to metal ion;GO:0044267//cellular protein metabolic process;GO:0044403//symbiosis, encompassing mutualism through parasitism;GO:0044710//single-organism metabolic process
MSTRG.31258	--	34.06	39.57	33.49	80.81	77.84	81.6	14.47	16.93	15.94	15.78	80.0833	35.7067	-1.165308565	5.80E-08	6.42E-07	-1.178096255	4.42E-11	4.89E-09	transmembrane protein [Arabidopsis thaliana]	-	-	-	-
MSTRG.31272	LCR25	0.28	0	0	1.35	4.48	1.82	0	0	0	0	2.55	0.0933	-4.771961016	0.000259662	0.001557281	-6.544320516	0.604397198	0.980399641	defensin-like protein 159 [Brassica rapa]	-	-	-	-
MSTRG.31305	--	16.97	10.72	9.51	138.52	190.04	143.53	3.14	4.47	3.05	3.5533	157.3633	12.4	-3.665687397	2.11E-48	2.00E-46	-1.803095183	4.72E-06	0.0001814	unnamed protein product [Brassica rapa]	-	-	-	-
MSTRG.31321	--	1.52	0.72	1.25	0.66	0.14	0.59	2.29	1.24	1.35	1.6267	0.4633	1.1633	1.328142153	0.012411423	0.046934976	0.483654111	0.157265965	0.650298757	unnamed protein product [Brassica napus]	-	-	-	-
MSTRG.31362	BLH2	6.38	8.07	5.96	16.26	20.11	21.22	4.26	4.18	3.5	3.98	19.1967	6.8033	-1.49654214	2.15E-08	2.51E-07	-0.773473346	0.008628221	0.102443289	LOW QUALITY PROTEIN: BEL1-like homeodomain protein 2 [Brassica napus]	-	GO:0043231//intracellular membrane-bounded organelle	GO:0001071//nucleic acid binding transcription factor activity;GO:0003676//nucleic acid binding	GO:0009887//organ morphogenesis;GO:0010467//gene expression;GO:0034645//cellular macromolecule biosynthetic process
MSTRG.31405	At4g38062	0.11	0.02	0.02	0.82	1.06	0.98	0	0.12	0	0.04	0.9533	0.05	-4.252980741	6.92E-06	5.63E-05	-0.321928095	0.950584045	0.990141952	basic helix loop helix (bHLH) DNA-binding superfamily protein [Arabidopsis thaliana]	-	-	-	GO:0010467//gene expression;GO:0034645//cellular macromolecule biosynthetic process
MSTRG.31418	LCR45	0	0.24	0	5.68	21.95	13.2	0	0	0.18	0.06	13.61	0.08	-7.410451352	6.22E-12	1.04E-10	-0.415037499	0.989007691	0.997775622	defensin-like protein 75 [Brassica rapa]	-	-	-	-
MSTRG.31663	--	0.86	0.48	0.63	2.95	2.46	2.08	0.76	0.39	0.8	0.65	2.4967	0.6567	-1.926770089	0.000284462	0.001690485	-0.014721506	0.626427861	0.980399641	BnaA05g14840D [Brassica napus]	-	-	-	-
MSTRG.31695	--	1.45	1.72	1.17	5.23	6.22	5.89	0.41	0.52	0.38	0.4367	5.78	1.4467	-1.998336951	4.03E-06	3.41E-05	-1.728128231	0.011292869	0.124790212	PREDICTED: two pore calcium channel protein 1 [Brassica oleracea var. oleracea] [Brassica oleracea]	-	-	-	-
MSTRG.31822	--	0	0	0	0.65	6.16	1.7	0	0	0	0	2.8367	0	-11.46998092	5.54E-06	4.59E-05	0	1	1	unnamed protein product [Brassica napus]	-	-	-	-
MSTRG.31856	TWN2	0.17	0.08	0.05	0.81	2.13	1.7	0.14	0.12	0.09	0.1167	1.5467	0.1	-3.9510904	2.29E-09	3.00E-08	0.222392421	0.488927743	0.973950554	valine--tRNA ligase, mitochondrial 1-like [Brassica napus]	ko00970//Aminoacyl-tRNA biosynthesis	GO:0009536//plastid	GO:0004812//aminoacyl-tRNA ligase activity;GO:0032550//purine ribonucleoside binding;GO:0052689//carboxylic ester hydrolase activity	GO:0003006//developmental process involved in reproduction;GO:0006418//tRNA aminoacylation for protein translation;GO:0006448//regulation of translational elongation
MSTRG.31879	--	0.81	1.1	0.8	0.5	0.22	0.35	0.38	0.59	0.29	0.42	0.3567	0.9033	1.340682055	0.000205176	0.001260088	-1.104869118	0.149819748	0.635704564	unnamed protein product [Brassica napus]	-	-	-	-
MSTRG.3190	--	0.57	0.46	0.45	0.09	0	0	0.2	0.33	0	0.1767	0.03	0.4933	4.039528364	0.000379951	0.002197963	-1.481532911	0.246127639	0.789448315	unnamed protein product [Brassica napus]	-	-	-	-
MSTRG.31919	--	1	2.21	1.42	6.91	4.52	7.03	0.69	0.77	0.65	0.7033	6.1533	1.5433	-1.995318454	2.68E-05	0.000195579	-1.133769195	0.046817561	0.33312042	BnaCnng61760D, partial [Brassica napus]	-	GO:0043231//intracellular membrane-bounded organelle	-	GO:0001101//response to acid chemical;GO:0032787//monocarboxylic acid metabolic process
MSTRG.31929	--	0.17	0.45	0.1	0	0.07	0.01	0	0.13	0	0.0433	0.0267	0.24	3.169925001	0.000792418	0.004256834	-2.469485283	0.089910161	0.490858482	BnaCnng69530D [Brassica napus]	-	-	-	-
MSTRG.31976	PTAC6	0.62	0.73	0.8	0	0.12	0.11	1.07	0.93	0.78	0.9267	0.0767	0.7167	3.224630894	2.98E-05	0.000216334	0.370748223	0.186178028	0.706012755	BnaC08g19870D [Brassica napus]	-	GO:0000229//cytoplasmic chromosome;GO:0009536//plastid	-	GO:0006355//regulation of transcription, DNA-templated;GO:0009658//chloroplast organization;GO:0009668//plastid membrane organization;GO:0009887//organ morphogenesis;GO:0010608//posttranscriptional regulation of gene expression;GO:0016072//rRNA metabolic process;GO:0031399//regulation of protein modification process;GO:0043623//cellular protein complex assembly;GO:0048869//cellular developmental …
MSTRG.32038	--	18.24	16.91	18.32	4.33	4.43	4.61	14.99	15.83	15.51	15.4433	4.4567	17.8233	1.999730211	5.34E-76	9.39E-74	-0.206782994	0.303211599	0.851670566	BnaC03g69470D [Brassica napus]	-	GO:0005618//cell wall;GO:0031224//intrinsic component of membrane	-	GO:0006498//N-terminal protein lipidation;GO:0006625//protein targeting to peroxisome;GO:0009062//fatty acid catabolic process
MSTRG.32392	--	0.09	0.07	0.13	1.13	1.46	1.31	0.06	0.16	0.04	0.0867	1.3	0.0967	-3.749349319	4.78E-12	8.14E-11	-0.157541277	0.904978824	0.980399641	PREDICTED: verprolin-like, partial [Raphanus sativus]	-	-	-	-
MSTRG.32495	ICP55	1.06	1.31	1.34	2.75	2.98	3.16	1.5	1.57	1.09	1.3867	2.9633	1.2367	-1.260764232	0.009338224	0.03679227	0.165164342	0.100212019	0.520035114	intermediate cleaving peptidase 55, mitochondrial [Brassica rapa]	-	GO:0043231//intracellular membrane-bounded organelle	GO:0008237//metallopeptidase activity;GO:0008238//exopeptidase activity;GO:0046914//transition metal ion binding	GO:0019538//protein metabolic process
MSTRG.3256	BGLU19	11.32	10.27	18.3	0	0	0	122.95	50.72	97.96	90.5433	0	13.2967	13.698777	5.68E-25	2.22E-23	2.767543797	1.79E-11	2.08E-09	beta-glucosidase 19 isoform X1 [Brassica napus]	ko01100//Metabolic pathways;ko01110//Biosynthesis of secondary metabolites;ko00940//Phenylpropanoid biosynthesis;ko00500//Starch and sucrose metabolism;ko00460//Cyanoamino acid metabolism	GO:0005911//cell-cell junction;GO:0009526//plastid envelope;GO:0042579//microbody;GO:0044432//endoplasmic reticulum part	GO:0005543//phospholipid binding;GO:0008422//beta-glucosidase activity;GO:0016791//phosphatase activity;GO:0019899//enzyme binding;GO:0046914//transition metal ion binding;GO:0046983//protein dimerization activity	GO:0000003//reproduction;GO:0006091//generation of precursor metabolites and energy;GO:0006470//protein dephosphorylation;GO:0006568//tryptophan metabolic process;GO:0006605//protein targeting;GO:0006714//sesquiterpenoid metabolic process;GO:0006873//cellular ion homeostasis;GO:0006996//organelle organization;GO:0009267//cellular response to starvation;GO:0009409//response to cold;GO:0009608//res…
MSTRG.32829	--	0.92	0.71	0.6	4.28	4.35	3.83	0.11	0	0.35	0.1533	4.1533	0.7433	-2.482188453	1.06E-06	9.81E-06	-2.277337944	0.049425081	0.344516894	hypothetical protein Bca52824_039555 [Brassica carinata]	-	-	-	-
MSTRG.32913	PIP1.4	31.66	38.49	26.37	62.6	48.12	48.71	13.43	15.63	12.38	13.8133	53.1433	32.1733	-0.724023307	0.532548019	0.782817665	-1.219803913	4.14E-09	3.08E-07	aquaporin PIP1-3 isoform X2 [Brassica napus]	-	-	-	-
MSTRG.33002	--	6.96	6.79	7.67	11.6	8.83	8.93	3.4	4.22	2.98	3.5333	9.7867	7.14	-0.454893488	0.255477507	0.50012547	-1.014894215	5.09E-05	0.001473804	Zinc finger CCHC-type [Arabidopsis thaliana x Arabidopsis arenosa]	-	-	GO:0005488//binding	-
MSTRG.33185	DGK7	4.47	4.02	3.58	1.7	1.62	1.17	0.84	2.77	0.9	1.5033	1.4967	4.0233	1.426638326	1.39E-12	2.49E-11	-1.420226337	0.012201272	0.132118383	PREDICTED: diacylglycerol kinase 7 [Camelina sativa]	ko01100//Metabolic pathways;ko01110//Biosynthesis of secondary metabolites;ko00564//Glycerophospholipid metabolism;ko00561//Glycerolipid metabolism;ko04070//Phosphatidylinositol signaling system	-	-	-
MSTRG.33262	--	0	0	0	0.51	0.28	1.76	0	0	0	0	0.85	0	-9.731319031	0.003824417	0.01711594	0	1	1	BnaC03g24080D [Brassica napus]	-	-	-	-
MSTRG.33292	--	7.19	9.65	5.34	116.34	203.43	109	1.5	3.61	1.06	2.0567	142.9233	7.3933	-4.272872697	1.21E-41	9.80E-40	-1.845916971	0.001143187	0.020464083	Defensin-like (DEFL) family protein [Arabidopsis thaliana]	-	-	-	-
MSTRG.33369	--	3.72	3.23	2.67	1.51	1.02	1.39	1.96	2.38	2.53	2.29	1.3067	3.2067	1.29518324	1.65E-11	2.67E-10	-0.485726795	0.565115737	0.980399641	LOW QUALITY PROTEIN: BEL1-like homeodomain protein 2 [Brassica napus]	-	-	-	-
MSTRG.33450	TMK3	0.11	0.1	0.1	0.91	0.65	0.67	0	0.05	0	0.0167	0.7433	0.1033	-2.84670359	0.005834395	0.024622291	-2.632268215	0.36200754	0.90384224	receptor-like kinase TMK3 [Brassica rapa]	-	-	-	-
MSTRG.33693	--	0	0.22	0.11	3.08	7.65	5.49	0	0	0	0	5.4067	0.11	-5.619163985	4.47E-06	3.76E-05	-6.781359714	0.623652705	0.980399641	Molecular chaperone Hsp40/DnaJ family protein [Arabidopsis thaliana]	-	-	-	-
MSTRG.33736	NRPD1	0.22	0.29	0.16	0.56	1.03	0.71	0.13	0.25	0.21	0.1967	0.7667	0.2233	-1.77940086	0.003548603	0.016029248	-0.183446141	0.780285682	0.980399641	DNA-directed RNA polymerase IV subunit 1 [Brassica rapa]	-	GO:0044451//nucleoplasm part	GO:0003676//nucleic acid binding;GO:0034062//RNA polymerase activity;GO:0046914//transition metal ion binding;GO:0048037//cofactor binding	GO:0006305//DNA alkylation;GO:0006342//chromatin silencing;GO:0007154//cell communication;GO:0030422//production of siRNA involved in RNA interference;GO:0034968//histone lysine methylation;GO:0045087//innate immune response;GO:1901564//organonitrogen compound metabolic process
MSTRG.33769	--	0	0	0	0.77	0.13	0.38	0.32	1.08	0.17	0.5233	0.4267	0	-8.736965594	0.004690781	0.020399893	9.031586343	5.45E-05	0.00156314	glycine-rich cell wall structural protein 2 [Eutrema salsugineum]	-	-	-	-
MSTRG.33792	At1g29470	2.32	2.14	1.53	6.14	6.16	6.03	0.6	0.55	0.6	0.5833	6.11	1.9967	-1.613578878	6.40E-06	5.25E-05	-1.775201081	0.000121488	0.003129026	BnaA09g54540D [Brassica napus]	-	-	-	-
MSTRG.33806	ACS10	2.81	2.85	1.76	15.94	14.96	14.68	1.15	1.22	0.94	1.1033	15.1933	2.4733	-2.618909833	8.05E-30	4.00E-28	-1.16458797	0.003646432	0.052812191	probable aminotransferase ACS10 [Brassica rapa]	-	-	GO:0008483//transaminase activity;GO:0016846//carbon-sulfur lyase activity;GO:0043168//anion binding	GO:0006520//cellular amino acid metabolic process;GO:0009692//ethylene metabolic process
MSTRG.33860	--	0.2	0.09	0.36	1.13	2.26	1.69	0.15	0	0.36	0.17	1.6933	0.2167	-2.966316874	0.000774515	0.004169156	-0.349942471	0.980995822	0.995950266	BnaA10g08790D [Brassica napus]	-	-	-	-
MSTRG.33874	--	7.88	2.22	2.82	93.64	203.65	137.23	0.49	0.86	0.45	0.6	144.84	4.3067	-5.071744608	8.03E-13	1.47E-11	-2.843537258	3.57E-05	0.001081928	Reverse transcriptase RNA-dependent DNA polymerase [Arabidopsis suecica]	-	-	-	-
MSTRG.33875	--	1.27	0.61	0.52	10.5	22.97	12.06	0.3	0.27	0.32	0.2967	15.1767	0.8	-4.245711148	1.64E-22	5.66E-21	-1.431157165	0.059948051	0.387517135	BnaC08g09510D [Brassica napus]	-	-	-	-
MSTRG.3391	--	0.09	0	0.08	3.4	37.51	48.31	0	0	0	0	29.74	0.0567	-9.035688592	6.02E-12	1.01E-10	-5.824428435	0.723736839	0.980399641	BnaA01g25930D [Brassica napus]	-	-	-	-
MSTRG.3392	--	0.63	0.72	0.55	23.05	90.17	35.94	0.46	0.39	0.27	0.3733	49.72	0.6333	-6.294717473	2.06E-16	4.95E-15	-0.762500686	0.596241796	0.980399641	PREDICTED: wiskott-Aldrich syndrome protein homolog 1-like [Raphanus sativus]	-	-	-	-
MSTRG.3394	--	1.49	0.47	0.54	30.33	127.89	46.36	0.63	0.66	0.09	0.46	68.1933	0.8333	-6.354593207	1.31E-12	2.34E-11	-0.857259828	0.613187531	0.980399641	PREDICTED: wiskott-Aldrich syndrome protein homolog 1-like [Raphanus sativus]	-	-	-	-
MSTRG.3396	--	11.12	7.24	7.77	77.16	196.25	93.49	7.1	7.09	5.56	6.5833	122.3	8.71	-3.811607875	2.29E-11	3.65E-10	-0.403854471	0.753281427	0.980399641	BnaA01g27700D [Brassica napus]	-	-	-	-
MSTRG.34025	SAP4	1.26	1.01	1.17	0.54	0.51	0.37	1.03	1.06	0.97	1.02	0.4733	1.1467	1.276517635	1.70E-06	1.53E-05	-0.168876912	0.643470368	0.980399641	zinc finger A20 and AN1 domain-containing stress-associated protein 6-like [Brassica rapa]	-	-	GO:0046872//metal ion binding	-
MSTRG.34056	ATO	0.02	0.04	0.07	0.31	1	0.36	0.02	0.02	0	0.0133	0.5567	0.0433	-3.683264574	0.000412114	0.002362535	-1.700439718	0.355254558	0.898606057	BnaA09g13460D [Brassica napus]	ko03040//Spliceosome	GO:0044424//intracellular part	GO:0005488//binding	GO:0003006//developmental process involved in reproduction;GO:0009628//response to abiotic stimulus;GO:0009791//post-embryonic development;GO:0010467//gene expression;GO:0033036//macromolecule localization;GO:0045595//regulation of cell differentiation;GO:0048507//meristem development;GO:0051704//multi-organism process;GO:0070646//protein modification by small protein removal;GO:0090304//nucleic …
MSTRG.34057	--	51.13	47.44	44.99	234.84	426.73	295.09	32.48	31.64	20.89	28.3367	318.8867	47.8533	-2.736352449	1.08E-28	5.14E-27	-0.755949363	0.011487189	0.126339923	BnaC09g13850D [Brassica napus]	-	-	-	-
MSTRG.34133	purB	1.59	1.01	1.25	4.29	4.24	4.65	1.03	1.08	0.82	0.9767	4.3933	1.2833	-1.775420019	1.51E-06	1.37E-05	-0.393957781	0.881775344	0.980399641	adenylosuccinate lyase [Brassica rapa]	ko01100//Metabolic pathways;ko01110//Biosynthesis of secondary metabolites;ko00230//Purine metabolism;ko00250//Alanine, aspartate and glutamate metabolism	GO:0009532//plastid stroma	GO:0016842//amidine-lyase activity	GO:0006167//AMP biosynthetic process;GO:0006188//IMP biosynthetic process
MSTRG.34155	--	1.8	0.49	0.55	7.54	29.36	25.37	0.74	0.5	1.26	0.8333	20.7567	0.9467	-4.454574444	6.76E-12	1.13E-10	-0.183962835	0.813571833	0.980399641	PREDICTED: non-specific lipid-transfer protein 2 [Brassica oleracea var. oleracea] [Brassica oleracea]	-	-	-	GO:0006355//regulation of transcription, DNA-templated;GO:0009891//positive regulation of biosynthetic process;GO:0033036//macromolecule localization;GO:0044763//single-organism cellular process;GO:0044765//single-organism transport;GO:0071702//organic substance transport
MSTRG.34266	At1g54445	0.78	0.99	0.78	12.76	21.6	11.78	0	0.48	0.45	0.31	15.38	0.85	-4.177448852	2.04E-15	4.54E-14	-1.455194626	0.289368561	0.83787761	BnaC06g10140D [Brassica napus]	-	-	-	-
MSTRG.34292	--	1.53	0.93	0.56	0.15	0.18	0.35	0.23	1.72	1.22	1.0567	0.2267	1.0067	2.150941898	0.001085062	0.005642661	0.069934291	0.606346519	0.980399641	hypothetical protein Bca52824_059607 [Brassica carinata]	-	-	-	-
MSTRG.34356	--	11.85	15.31	14.05	2.49	2.1	1.57	26.7	23.44	25.37	25.17	2.0533	13.7367	2.741992208	1.18E-45	1.05E-43	0.873673254	1.92E-15	3.84E-13	unnamed protein product [Brassica napus]	-	-	-	-
MSTRG.34371	NEK3	0.49	0.76	0.37	1.94	2.58	2.33	0.22	0.49	0.21	0.3067	2.2833	0.54	-2.080110175	2.47E-06	2.17E-05	-0.816288047	0.325100298	0.871078467	BnaC07g49440D [Brassica napus]	-	-	-	-
MSTRG.34381	--	4.66	4.18	3.5	0.94	0.52	0.87	3.95	4.76	4.65	4.4533	0.7767	4.1133	2.404940534	1.08E-18	3.00E-17	0.114577613	0.061310936	0.392892518	hypothetical protein F2Q68_00019948 [Brassica cretica]	-	-	-	-
MSTRG.34421	--	0	0.08	0.04	0.78	1.16	1.65	0	0	0	0	1.1967	0.04	-4.902877533	3.92E-05	0.000277449	-5.321928095	0.623652705	0.980399641	NAC domain-containing protein 41-like [Brassica napus]	-	-	-	GO:0048229//gametophyte development
MSTRG.34559	At4g12617	0.08	0.25	0.2	1.39	5.17	49.66	0.13	0.65	0.23	0.3367	18.74	0.1767	-6.728947284	3.69E-05	0.000262552	0.930291028	0.315971533	0.863389269	BnaC03g29690D [Brassica napus]	-	GO:0043231//intracellular membrane-bounded organelle	-	-
MSTRG.34633	--	0.22	0.25	0.19	1.91	4.63	2.56	0.05	0.32	0.25	0.2067	3.0333	0.22	-3.785328616	8.57E-11	1.30E-09	-0.090197809	0.928589046	0.984507457	BnaA09g28270D [Brassica napus]	-	-	-	-
MSTRG.3474	TDR	2.12	1.7	2.2	1.29	0.84	1.31	0.6	1.15	0.8	0.85	1.1467	2.0067	0.807354922	1.07E-08	1.30E-07	-1.23926624	0.000801477	0.01544059	leucine-rich repeat receptor-like protein kinase TDR [Brassica rapa]	-	GO:0031224//intrinsic component of membrane	GO:0004672//protein kinase activity;GO:0016491//oxidoreductase activity;GO:0032550//purine ribonucleoside binding	GO:0001763//morphogenesis of a branching structure;GO:0006464//cellular protein modification process;GO:0006796//phosphate-containing compound metabolic process;GO:0009799//specification of symmetry;GO:0009933//meristem structural organization;GO:0009943//adaxial/abaxial axis specification;GO:0010065//primary meristem tissue development;GO:0010087//phloem or xylem histogenesis;GO:0044763//single-…
MSTRG.34747	HSL1	2.57	2.5	1.99	15.59	12.45	12.31	1.33	1.39	1.07	1.2633	13.45	2.3533	-2.514828585	4.93E-34	2.91E-32	-0.897470335	0.007553822	0.09276323	receptor-like protein kinase HSL1 [Brassica rapa]	-	GO:0044464//cell part	GO:0004672//protein kinase activity;GO:0036094//small molecule binding;GO:0097159//organic cyclic compound binding;GO:1901363//heterocyclic compound binding	GO:0000226//microtubule cytoskeleton organization;GO:0005976//polysaccharide metabolic process;GO:0006355//regulation of transcription, DNA-templated;GO:0006468//protein phosphorylation;GO:0007059//chromosome segregation;GO:0007165//signal transduction;GO:0009606//tropism;GO:0009793//embryo development ending in seed dormancy;GO:0009826//unidimensional cell growth;GO:0010029//regulation of seed g…
MSTRG.34883	At3g59000	1.67	1.55	1.46	2.54	3.92	3.53	0.45	0.64	0.48	0.5233	3.33	1.56	-1.093976148	0.067724567	0.188306871	-1.575743971	0.000379159	0.00824851	F-box protein At3g59000-like [Brassica napus]	-	-	-	GO:0009791//post-embryonic development;GO:0050896//response to stimulus
MSTRG.35004	BGLU11	1.96	1.92	1.36	0.59	0.66	0.57	1.14	1.21	0.53	0.96	0.6067	1.7467	1.525628361	2.04E-09	2.69E-08	-0.863498	0.418120134	0.937199229	BnaA09g18550D [Brassica napus]	ko01100//Metabolic pathways;ko01110//Biosynthesis of secondary metabolites;ko00940//Phenylpropanoid biosynthesis;ko00500//Starch and sucrose metabolism;ko00460//Cyanoamino acid metabolism	-	-	-
MSTRG.35032	ppt-1	0	0	0	0.21	0.95	0.14	0.04	0.1	0.09	0.0767	0.4333	0	-8.759333407	0.004211409	0.018578188	6.26052755	0.14109208	0.617068959	PREDICTED: palmitoyl-protein thioesterase 3-like isoform X1 [Brassica oleracea var. oleracea] [Brassica oleracea]	ko01100//Metabolic pathways;ko01212//Fatty acid metabolism;ko00062//Fatty acid elongation	-	-	-
MSTRG.35035	--	0.52	0.46	0.5	0	0	0	0.49	0.31	0.52	0.44	0	0.4933	8.94641896	1.60E-05	0.000121439	-0.165059246	0.811404971	0.980399641	-	-	-	-	-
MSTRG.35057	At5g46871	6.44	3.78	2.47	16.41	27.48	25.31	1.6	3	2.44	2.3467	23.0667	4.23	-2.447079969	3.22E-07	3.22E-06	-0.850044735	0.300781277	0.849375953	defensin-like protein 308 [Brassica rapa]	-	-	-	GO:0001906//cell killing;GO:0009620//response to fungus
MSTRG.35063	At5g46871	68.73	80.35	66.8	164.36	179.97	177.8	11.54	15.51	7.49	11.5133	174.0433	71.96	-1.274179462	5.83E-11	8.99E-10	-2.643889604	3.28E-30	3.33E-27	BnaA08g04760D [Brassica napus]	-	-	-	GO:0001906//cell killing;GO:0009620//response to fungus
MSTRG.35140	--	0	0	0.13	0.37	0.66	0.85	0	0	0.04	0.0133	0.6267	0.0433	-3.854149134	0.00653715	0.027164046	-1.700439718	0.665591891	0.980399641	Galactose mutarotase-like superfamily protein [Arabidopsis thaliana]	ko01100//Metabolic pathways;ko01110//Biosynthesis of secondary metabolites;ko00010//Glycolysis / Gluconeogenesis	GO:0043231//intracellular membrane-bounded organelle	GO:0003824//catalytic activity;GO:0005488//binding	GO:0019318//hexose metabolic process
MSTRG.35156	--	0.3	1.02	0.87	0.18	0.27	0.48	0.38	0.75	0.4	0.51	0.31	0.73	1.235628248	0.013172395	0.049328137	-0.517399217	0.764419445	0.980399641	BnaC09g22460D [Brassica napus]	-	-	-	-
MSTRG.3516	--	1.91	1.49	1.99	1.12	0.7	0.62	1.81	1.3	2.92	2.01	0.8133	1.7967	1.143404125	0.000529973	0.002966533	0.161872729	0.297757721	0.846088075	unnamed protein product [Brassica oleracea]	-	-	-	-
MSTRG.35206	RE2	1.06	2.43	0.72	1.04	1.1	1.27	0.2	0.26	0.24	0.2333	1.1367	1.4033	0.304048494	0.028092309	0.092899331	-2.588393406	6.85E-06	0.00025388	01P13-1 [Brassica rapa subsp. pekinensis] [Brassica rapa]	-	-	-	-
MSTRG.35371	--	0.27	0.18	0.3	1.26	0.74	1.16	0.06	0.1	0.07	0.0767	1.0533	0.25	-2.074962058	0.002803479	0.0130349	-1.705256734	0.103944351	0.530427923	PREDICTED: histone H1.2-like [Brassica oleracea var. oleracea] [Brassica oleracea]	-	-	-	-
MSTRG.35420	ATS1	0	0.06	0	1.77	1.42	2.35	0	0	0	0	1.8467	0.02	-6.528779665	1.56E-05	0.000118961	-4.321928095	0.903039578	0.980399641	LOW QUALITY PROTEIN: glycerol-3-phosphate acyltransferase, chloroplastic [Brassica rapa]	ko01100//Metabolic pathways;ko00564//Glycerophospholipid metabolism;ko00561//Glycerolipid metabolism	GO:0009532//plastid stroma;GO:0031224//intrinsic component of membrane;GO:0043232//intracellular non-membrane-bounded organelle	GO:0004497//monooxygenase activity;GO:0008374//O-acyltransferase activity;GO:0016684//oxidoreductase activity, acting on peroxide as acceptor;GO:0016705//oxidoreductase activity, acting on paired donors, with incorporation or reduction of molecular oxygen;GO:0046872//metal ion binding	GO:0001101//response to acid chemical;GO:0006090//pyruvate metabolic process;GO:0006633//fatty acid biosynthetic process;GO:0006779//porphyrin-containing compound biosynthetic process;GO:0006996//organelle organization;GO:0009409//response to cold;GO:0009639//response to red or far red light;GO:0009756//carbohydrate mediated signaling;GO:0009793//embryo development ending in seed dormancy;GO:0016…
MSTRG.35450	--	0.91	0.88	0.74	3.13	3.83	3.56	0.93	0.35	1.27	0.85	3.5067	0.8433	-2.055925415	0.001338442	0.006795763	0.011359862	0.639931544	0.980399641	BnaA05g20700D [Brassica napus]	-	-	-	-
MSTRG.35515	--	0.86	1.51	1.09	0.11	0.12	0.07	0.84	1.08	0.99	0.97	0.1	1.1533	3.527737632	2.89E-17	7.31E-16	-0.249752885	0.822606961	0.980399641	BnaC07g06740D [Brassica napus]	-	-	-	-
MSTRG.35531	--	1.21	0.92	0.52	0.22	0.14	0.04	0.3	0.58	0.45	0.4433	0.1333	0.8833	2.727920455	2.80E-05	0.000204216	-0.994566114	0.322824703	0.868568954	unnamed protein product [Brassica napus]	-	-	-	-
MSTRG.35537	--	1.53	2.48	1.91	4.55	3.73	3.99	0.22	0	0.82	0.3467	4.09	1.9733	-1.051466168	0.056360276	0.162890284	-2.509013647	0.001764468	0.029329462	-	-	-	-	-
MSTRG.35556	At1g12663	0	0	0	3.06	2.17	0.84	0	0	0.16	0.0533	2.0233	0	-10.9825183	4.77E-06	3.99E-05	5.736965594	0.562683477	0.980399641	thionin-like protein 2 [Brassica rapa]	-	-	-	-
MSTRG.3557	--	0.46	0.56	0.63	1.69	1.75	1.62	0.23	0.38	0.42	0.3433	1.6867	0.55	-1.61667136	0.000668274	0.003651143	-0.679821687	0.455079932	0.960951404	BnaC07g15150D [Brassica napus]	-	-	-	-
MSTRG.35631	--	0.72	0.49	0.72	0.05	0.04	0.04	0.47	0.53	0.67	0.5567	0.0433	0.6433	3.892017319	4.07E-05	0.0002872	-0.208752745	0.850893665	0.980399641	hypothetical protein BRARA_I02820 [Brassica rapa]	-	-	-	-
MSTRG.35634	--	1.7	1.44	1.31	0.25	0.23	0.24	1	1.09	1.06	1.05	0.24	1.4833	2.627736524	3.35E-37	2.25E-35	-0.498453507	0.419396381	0.937624832	BnaA09g26190D [Brassica napus]	-	-	-	-
MSTRG.35710	--	1.47	1.54	0.83	4.41	4.49	3.79	0.46	0.69	0.22	0.4567	4.23	1.28	-1.724513853	7.08E-05	0.000477278	-1.486930418	0.020180344	0.191108217	BnaC03g59940D [Brassica napus]	-	-	-	-
MSTRG.35711	--	1.17	1.04	0.41	4.46	5.56	4.3	0.28	0.19	0.66	0.3767	4.7733	0.8733	-2.450392776	6.19E-07	5.94E-06	-1.213244039	0.201491168	0.730543294	hypothetical protein HID58_061323, partial [Brassica napus]	-	-	-	-
MSTRG.35715	--	0.06	0.06	0.06	0.93	1.42	0.97	0	0.13	0.25	0.1267	1.1067	0.06	-4.20511443	0.000829891	0.004434101	1.078002512	0.41421884	0.936221624	unnamed protein product [Brassica napus]	-	-	-	-
MSTRG.35789	SNL3	0	0	0	0.33	2.27	1.49	0	0	0	0	1.3633	0	-10.41292263	7.62E-06	6.15E-05	0	1	1	PREDICTED: paired amphipathic helix protein Sin3-like 3 [Raphanus sativus]	-	GO:0043231//intracellular membrane-bounded organelle	-	GO:0001101//response to acid chemical;GO:0006355//regulation of transcription, DNA-templated
MSTRG.35858	ABCA11	0.73	0.59	0.68	0.14	0.11	0.22	0.6	0.52	0.3	0.4733	0.1567	0.6667	2.089267338	5.23E-06	4.35E-05	-0.49410907	0.757442214	0.980399641	cellulose synthase A catalytic subunit 5 [UDP-forming] isoform X2 [Eutrema salsugineum]	-	GO:0016020//membrane;GO:0043231//intracellular membrane-bounded organelle;GO:1990234//transferase complex	GO:0046527//glucosyltransferase activity	GO:0000281//mitotic cytokinesis;GO:0003006//developmental process involved in reproduction;GO:0009826//unidimensional cell growth;GO:0010191//mucilage metabolic process;GO:0019758//glycosinolate biosynthetic process;GO:0030243//cellulose metabolic process;GO:0030865//cortical cytoskeleton organization;GO:0042546//cell wall biogenesis;GO:0043479//pigment accumulation in tissues in response to UV l…
MSTRG.35962	SPH4	0.12	0.06	0.1	0.3	1.02	0.38	0.11	0.25	0.12	0.16	0.5667	0.0933	-2.602036014	0.013259682	0.049614977	0.777607579	0.23823967	0.78262815	Plant self-incompatibility S1 [Arabidopsis suecica]	-	-	-	-
MSTRG.36291	GATA8	7.89	8.95	7.72	19.29	18.43	15.04	4.47	5.83	3.68	4.66	17.5867	8.1867	-1.103134004	0.001165214	0.006006016	-0.8129462	0.009745567	0.111768193	GATA transcription factor 8 isoform X2 [Brassica rapa]	-	GO:0043231//intracellular membrane-bounded organelle	GO:0003677//DNA binding;GO:0046914//transition metal ion binding	GO:0006355//regulation of transcription, DNA-templated;GO:0044707//single-multicellular organism process;GO:0048511//rhythmic process
MSTRG.36353	GLC1	0.52	0.16	0.19	0.66	1.03	2.79	0.39	0.61	0.4	0.4667	1.4933	0.29	-2.364411426	0.009463405	0.037227538	0.686339521	0.100061391	0.51946304	PREDICTED: glucan endo-1,3-beta-glucosidase-like isoform X1 [Brassica oleracea var. oleracea] [Brassica oleracea]	-	GO:0005911//cell-cell junction;GO:0030312//external encapsulating structure	GO:0004553//hydrolase activity, hydrolyzing O-glycosyl compounds	GO:0010243//response to organonitrogen compound;GO:0044238//primary metabolic process
MSTRG.36374	ROPGEF6	0.5	0.34	0.24	1.55	2.05	1.96	0.28	0.25	0.31	0.28	1.8533	0.36	-2.364053571	3.81E-06	3.24E-05	-0.362570079	0.997656985	0.999387752	rop guanine nucleotide exchange factor 6 isoform X1 [Brassica rapa]	-	GO:0044464//cell part	GO:0005088//Ras guanyl-nucleotide exchange factor activity	-
MSTRG.36450	--	0.91	1.08	0.83	5.03	3.89	2.19	0.42	0.99	0.13	0.5133	3.7033	0.94	-1.978091749	0.004476288	0.019587396	-0.872764812	0.442465647	0.951997795	hypothetical protein HID58_091468 [Brassica napus]	-	-	-	-
MSTRG.36461	--	0.18	0.37	0.2	0.04	0	0	0.52	0.15	0.28	0.3167	0.0133	0.25	4.22881869	0.002650848	0.012415754	0.341036918	0.448894974	0.956462433	BnaCnng72340D, partial [Brassica napus]	-	-	-	-
MSTRG.36578	--	0.73	0.48	0.91	0.21	0.15	0.17	0.88	0.7	0.85	0.81	0.1767	0.7067	2	5.55E-05	0.000382388	0.196892049	0.293658202	0.843246871	unnamed protein product [Brassica napus]	-	-	-	-
MSTRG.36579	RFNR1	0.62	0.83	0.38	1.88	2.5	2.84	0.56	0.76	0.32	0.5467	2.4067	0.61	-1.980155189	0.00097652	0.005132841	-0.158147834	0.722058539	0.980399641	root FNR 1 [Arabidopsis thaliana]	ko01100//Metabolic pathways;ko00195//Photosynthesis	GO:0009536//plastid	GO:0016731//oxidoreductase activity, acting on iron-sulfur proteins as donors, NAD or NADP as acceptor;GO:0046914//transition metal ion binding	GO:0044237//cellular metabolic process;GO:0044710//single-organism metabolic process
MSTRG.36629	PIP1-2	5.03	6.23	5.63	0.11	0.05	0.37	6.07	5.96	5.36	5.7967	0.1767	5.63	4.994033158	7.68E-39	5.52E-37	0.042088605	0.035597194	0.279472237	50S ribosomal protein L30 [Brassica rapa]	ko03010//Ribosome	GO:0009536//plastid;GO:0031225//anchored component of membrane;GO:0044391//ribosomal subunit	GO:0005198//structural molecule activity;GO:0005372//water transmembrane transporter activity	GO:0006090//pyruvate metabolic process;GO:0006970//response to osmotic stress;GO:0006996//organelle organization;GO:0008104//protein localization;GO:0010038//response to metal ion;GO:0010467//gene expression;GO:0015669//gas transport;GO:0022613//ribonucleoprotein complex biogenesis;GO:0032774//RNA biosynthetic process;GO:0042044//fluid transport
MSTRG.36630	--	7.94	4.43	3.75	0	0	0	6.88	11.71	8.55	9.0467	0	5.3733	12.39160162	1.43E-16	3.48E-15	0.751568977	0.00020094	0.004806156	50S ribosomal protein L30 [Brassica rapa]	ko03010//Ribosome	GO:0044391//ribosomal subunit	GO:0005198//structural molecule activity	GO:0010467//gene expression;GO:0022613//ribonucleoprotein complex biogenesis;GO:0032774//RNA biosynthetic process
MSTRG.36668	PDCB5	0.08	0.14	0.07	0.73	1.08	1.22	0.08	0.17	0.16	0.1367	1.01	0.0967	-3.385192988	0.008830949	0.035068163	0.499571009	0.622646605	0.980399641	BnaA07g37930D [Brassica napus]	-	GO:0005911//cell-cell junction;GO:0031225//anchored component of membrane	GO:0030247//polysaccharide binding	-
MSTRG.36739	gyp7	2.8	2.84	3.09	1.42	1.09	1.26	2.15	2.76	2.62	2.51	1.2567	2.91	1.21141713	3.12E-08	3.58E-07	-0.213331789	0.711135952	0.980399641	PREDICTED: small G protein signaling modulator 1 [Brassica oleracea var. oleracea] [Brassica oleracea]	-	-	-	-
MSTRG.36837	PME36	20.83	17.14	24.86	0.32	0.19	0.22	55.67	49.06	53.68	52.8033	0.2433	20.9433	6.427413306	5.38E-81	1.03E-78	1.334137927	4.26E-28	3.51E-25	probable pectinesterase/pectinesterase inhibitor 36 [Brassica rapa]	-	-	-	-
MSTRG.37116	--	7.25	7.25	5.91	0.2	0.37	0.24	3.35	4.46	4.15	3.9867	0.27	6.8033	4.655210464	4.97E-65	6.86E-63	-0.771058793	0.022326946	0.204266806	unnamed protein product [Brassica napus]	-	-	-	-
MSTRG.37231	--	2.23	1.76	0.93	6	4.09	5.3	0.51	0.89	0.4	0.6	5.13	1.64	-1.645263011	0.00302537	0.013929374	-1.450661409	0.030489083	0.253303554	hypothetical protein IGI04_030636 [Brassica rapa subsp. trilocularis] [Brassica rapa]	-	-	-	-
MSTRG.37247	--	0.62	0.04	0.25	0	0	0	1.39	1.01	1.41	1.27	0	0.3033	8.244760234	0.000992725	0.005211135	2.065852547	7.71E-05	0.002124042	BnaA04g12410D [Brassica napus]	-	-	-	-
MSTRG.37317	At4g28400	0.23	0	0.07	0.77	0.89	1.05	0.03	0.13	0	0.0533	0.9033	0.1	-3.175258446	0.002845271	0.013209362	-0.906890596	0.686782821	0.980399641	probable protein phosphatase 2C 58 isoform X1 [Brassica rapa]	-	-	GO:0004721//phosphoprotein phosphatase activity;GO:0043169//cation binding	GO:0006568//tryptophan metabolic process;GO:0006796//phosphate-containing compound metabolic process;GO:0009683//indoleacetic acid metabolic process;GO:0009814//defense response, incompatible interaction
MSTRG.37467	--	0.44	0.63	0.3	1.51	1.36	1.77	0.14	0.08	0.17	0.13	1.5467	0.4567	-1.759948912	0.004433978	0.019432787	-1.812629864	0.038302389	0.292921089	hypothetical protein HID58_064229, partial [Brassica napus]	-	-	-	-
MSTRG.3764	At3g14410	2.28	2.31	1.96	5.48	6.23	5.82	1.17	1.75	1.08	1.3333	5.8433	2.1833	-1.420259184	3.44E-05	0.000246302	-0.711494907	0.197642617	0.724646854	probable sugar phosphate/phosphate translocator At3g14410 isoform X1 [Brassica rapa]	-	GO:0005840//ribosome;GO:0031224//intrinsic component of membrane	GO:0008509//anion transmembrane transporter activity;GO:0070011//peptidase activity, acting on L-amino acid peptides	GO:0006820//anion transport;GO:0015851//nucleobase transport;GO:0019941//modification-dependent protein catabolic process
MSTRG.37706	HSP90-6	0.66	1.12	0.58	2.51	2.2	2.85	0.26	0.06	0.39	0.2367	2.52	0.7867	-1.679599375	0.003281114	0.014946243	-1.73289593	0.041840627	0.309828178	heat shock protein 90-6, mitochondrial isoform X1 [Brassica napus]	ko04626//Plant-pathogen interaction;ko04141//Protein processing in endoplasmic reticulum	GO:0043231//intracellular membrane-bounded organelle;GO:0044444//cytoplasmic part	-	-
MSTRG.37903	SPH5	19.45	4.97	6.77	150.75	226.74	149.72	0.85	0.86	2.35	1.3533	175.7367	10.3967	-4.079222277	1.21E-08	1.46E-07	-2.94153192	1.09E-06	4.96E-05	BnaC05g23870D [Brassica napus]	-	-	-	-
MSTRG.37904	SPH5	5.97	2.89	2.04	85.92	170.98	98.65	0	0	0.1	0.0333	118.5167	3.6333	-5.027652416	2.74E-17	6.93E-16	-6.768184325	4.46E-07	2.21E-05	BnaC05g23870D [Brassica napus]	-	-	-	-
MSTRG.37911	--	1.25	0.7	0.51	1.14	0.61	1.18	0.3	0.28	0.22	0.2667	0.9767	0.82	-0.252242349	0.277661037	0.529070902	-1.62058641	0.000995437	0.01832929	hypothetical protein IGI04_043103 [Brassica rapa subsp. trilocularis] [Brassica rapa]	-	-	-	-
MSTRG.37921	RE2	0.3	0.62	0.76	0.5	0.51	0.93	0.08	0.03	0	0.0367	0.6467	0.56	-0.207595419	0.437233335	0.705278508	-3.932885804	0.000845673	0.016110125	BnaUnng05000D, partial [Brassica napus]	-	-	-	-
MSTRG.38084	At3g07100	0.28	0.07	0.13	5.11	5.3	4.82	0	0	0.15	0.05	5.0767	0.16	-4.987737726	7.84E-12	1.31E-10	-1.678071905	0.507593462	0.979901556	BnaA05g30470D [Brassica napus]	ko04141//Protein processing in endoplasmic reticulum	-	-	-
MSTRG.38159	NET3A	0.13	0.34	0.53	3.53	3.48	3.11	1.64	0.46	1.52	1.2067	3.3733	0.3333	-3.339137385	2.18E-08	2.55E-07	1.855989697	0.001600676	0.027034467	protein NETWORKED 3A isoform X2 [Brassica rapa]	-	-	-	-
MSTRG.38250	--	1.14	1.54	0.75	0.08	0.24	0.07	0.95	1.9	1.06	1.3033	0.13	1.1433	3.136662547	1.96E-07	2.02E-06	0.188960031	0.279986276	0.829580785	BnaC01g43360D [Brassica napus]	-	-	-	-
MSTRG.38259	--	1.65	2.08	1.92	0.56	0.6	0.55	2.04	2.04	2.37	2.15	0.57	1.8833	1.724254542	6.82E-13	1.25E-11	0.191048293	0.051736849	0.354202903	BnaC05g00220D [Brassica napus]	-	-	-	-
MSTRG.3832	RDR1	0	0	0	0.07	0.52	0.41	0	0	0	0	0.3333	0	-8.380821784	2.65E-05	0.000194014	0	1	1	RNA-dependent RNA polymerase 1-like [Brassica napus]	-	-	GO:0016740//transferase activity;GO:0097159//organic cyclic compound binding	GO:0006605//protein targeting;GO:0006952//defense response;GO:0009058//biosynthetic process;GO:0009755//hormone-mediated signaling pathway;GO:0009863//salicylic acid mediated signaling pathway;GO:0010468//regulation of gene expression;GO:0031399//regulation of protein modification process;GO:0035556//intracellular signal transduction;GO:0042743//hydrogen peroxide metabolic process;GO:0043067//reg…
MSTRG.38345	JASON	0.15	0.07	0.07	2.73	3.19	3.48	0	0.08	0	0.0267	3.1333	0.0967	-5.018535951	2.75E-07	2.78E-06	-1.857980995	0.558249567	0.980399641	protein JASON [Brassica rapa]	-	-	-	-
MSTRG.38346	JASON	0.13	0.16	0.08	2.92	3.03	3.33	0	0	0	0	3.0933	0.1233	-4.648527629	1.80E-11	2.91E-10	-6.94641896	0.110506532	0.547700943	protein JASON [Brassica rapa]	-	GO:0043231//intracellular membrane-bounded organelle	-	-
MSTRG.38408	--	1.39	1.65	1.58	6.72	8.86	8.01	0.44	0.54	0.47	0.4833	7.8633	1.54	-2.352210662	5.66E-11	8.75E-10	-1.671839951	0.006012709	0.077989762	BnaAnng14350D [Brassica napus]	-	-	-	-
MSTRG.38484	--	2.92	3.15	2.01	0	0.08	0.08	3.55	2.39	3.14	3.0267	0.0533	2.6933	5.658211483	1.11E-07	1.18E-06	0.168337005	0.239970979	0.784632201	LOW QUALITY PROTEIN: hypothetical protein HID58_013523 [Brassica napus]	-	-	-	-
MSTRG.38512	RAD16	0.65	0.57	0.27	2.47	3.1	2.56	0.08	0.21	0.18	0.1567	2.71	0.4967	-2.447943022	1.88E-08	2.21E-07	-1.664579669	0.025034462	0.22089625	ATP-dependent helicase rhp16 isoform X2 [Brassica rapa]	-	GO:0043231//intracellular membrane-bounded organelle	GO:0003676//nucleic acid binding;GO:0003824//catalytic activity;GO:0032550//purine ribonucleoside binding;GO:0046872//metal ion binding	-
MSTRG.38654	ACT5	0.07	0	0.26	1.14	6.28	3.09	0.06	0.18	0.14	0.1267	3.5033	0.11	-4.993152835	2.68E-07	2.71E-06	0.203533394	0.724276699	0.980399641	BnaC04g48100D [Brassica napus]	-	GO:0005856//cytoskeleton;GO:0005911//cell-cell junction;GO:0009526//plastid envelope;GO:0009532//plastid stroma;GO:0016020//membrane	GO:0036094//small molecule binding;GO:0097159//organic cyclic compound binding;GO:1901363//heterocyclic compound binding	GO:0006006//glucose metabolic process;GO:0007010//cytoskeleton organization;GO:0051603//proteolysis involved in cellular protein catabolic process
MSTRG.38674	CDC48E	0.79	0.52	0.85	0.28	0.28	0.17	0.5	0.31	0.31	0.3733	0.2433	0.72	1.565062943	1.14E-05	8.91E-05	-0.94753258	0.208912535	0.741008307	protein tesmin/TSO1-like CXC 7 isoform X2 [Brassica napus]	-	GO:0031224//intrinsic component of membrane;GO:0043231//intracellular membrane-bounded organelle	GO:0003824//catalytic activity;GO:0005381//iron ion transmembrane transporter activity	GO:0006826//iron ion transport
MSTRG.38678	--	1.19	2.06	0.98	3.65	4.61	4.28	0.62	0.89	0.9	0.8033	4.18	1.41	-1.56780778	0.013359696	0.049922132	-0.811624517	0.375901363	0.912236813	unnamed protein product [Brassica napus]	-	-	-	-
MSTRG.38750	BGLU11	13.26	11.17	14.75	0.09	0.02	0	24.05	19.98	23.36	22.4633	0.0367	13.06	8.476470064	2.00E-43	1.68E-41	0.782417128	3.53E-14	6.17E-12	PREDICTED: beta-glucosidase 11 isoform X2 [Brassica oleracea var. oleracea] [Brassica oleracea]	ko01100//Metabolic pathways;ko01110//Biosynthesis of secondary metabolites;ko00940//Phenylpropanoid biosynthesis;ko00500//Starch and sucrose metabolism;ko00460//Cyanoamino acid metabolism	-	GO:0015926//glucosidase activity	GO:0044238//primary metabolic process
MSTRG.38845	SEC14	0.33	0.49	0.48	1.51	2.3	1.3	0.35	0.49	0.59	0.4767	1.7033	0.4333	-1.974811668	0.005297759	0.022647018	0.137503524	0.470886285	0.967750006	phosphatidylinositol transfer protein 3 [Brassica rapa]	-	GO:0043231//intracellular membrane-bounded organelle	-	GO:0000097//sulfur amino acid biosynthetic process;GO:0051234//establishment of localization
MSTRG.38852	NAC002	13.13	12.63	15.79	5.74	6.14	8.46	16.92	13.43	20.27	16.8733	6.78	13.85	1.030528798	1.84E-16	4.43E-15	0.28485903	0.000890305	0.016824158	NAC domain-containing protein 2 [Brassica rapa]	-	GO:0043231//intracellular membrane-bounded organelle	GO:0001071//nucleic acid binding transcription factor activity	GO:0006972//hyperosmotic response;GO:0009404//toxin metabolic process;GO:0009694//jasmonic acid metabolic process;GO:0009787//regulation of abscisic acid-activated signaling pathway;GO:0010243//response to organonitrogen compound;GO:0010468//regulation of gene expression;GO:0014070//response to organic cyclic compound;GO:0034645//cellular macromolecule biosynthetic process;GO:0044707//single-mult…
MSTRG.38970	--	3.82	3.44	2.73	8.97	6.61	8.15	2.2	2.23	2.74	2.39	7.91	3.33	-1.248155517	0.008679377	0.034581323	-0.478511559	0.612544026	0.980399641	dehydration-responsive element-binding protein 1E [Brassica napus]	-	-	-	-
MSTRG.39143	--	0.7	0.43	1.04	4.1	5.48	4.27	0.6	0.67	0.42	0.5633	4.6167	0.7233	-2.674119028	8.73E-06	6.97E-05	-0.360671796	0.955323025	0.990907348	-	-	-	-	-
MSTRG.39148	--	0.11	0.23	0.26	0	0	0	0.25	0.04	0.3	0.1967	0	0.2	7.64385619	0.000636293	0.003493775	-0.024247546	0.767421475	0.980399641	-	-	-	-	-
MSTRG.39163	XCP2	3.13	1.61	2.4	1.01	0.46	0.89	2.09	1.27	0.97	1.4433	0.7867	2.38	1.597137215	5.70E-09	7.16E-08	-0.721557049	0.297106506	0.845660438	cysteine protease XCP2-like [Brassica napus]	-	GO:0005773//vacuole;GO:0030312//external encapsulating structure	GO:0008233//peptidase activity	GO:0012501//programmed cell death;GO:0045491//xylan metabolic process;GO:0048509//regulation of meristem development
MSTRG.39222	--	6.13	4.61	4.86	1.63	1.32	1.86	2.88	2.44	2.36	2.56	1.6033	5.2	1.69743723	5.11E-26	2.12E-24	-1.022367813	0.000767803	0.014929995	F-box protein At1g52495-like [Brassica rapa]	-	-	-	-
MSTRG.39237	AHA3	6.86	6.16	6	21.36	22.76	17.82	3.41	4.41	4.82	4.2133	20.6467	6.34	-1.703354137	9.06E-18	2.37E-16	-0.589520783	0.091420925	0.495109314	ATPase 3, plasma membrane-type [Brassica rapa]	ko00190//Oxidative phosphorylation	GO:0005911//cell-cell junction;GO:0031090//organelle membrane;GO:0031224//intrinsic component of membrane;GO:0043231//intracellular membrane-bounded organelle;GO:0044444//cytoplasmic part	GO:0008324//cation transmembrane transporter activity;GO:0015662//ATPase activity, coupled to transmembrane movement of ions, phosphorylative mechanism;GO:0032550//purine ribonucleoside binding;GO:0046872//metal ion binding	GO:0001101//response to acid chemical;GO:0006464//cellular protein modification process;GO:0006865//amino acid transport;GO:0006950//response to stress;GO:0009152//purine ribonucleotide biosynthetic process;GO:0009664//plant-type cell wall organization;GO:0010383//cell wall polysaccharide metabolic process;GO:0015698//inorganic anion transport;GO:0015833//peptide transport;GO:0015988//energy coup…
MSTRG.39261	--	0.99	0.81	0.33	0	0	0	0.22	0.32	0.08	0.2067	0	0.71	9.471675214	1.74E-05	0.000131218	-1.78051331	0.146867217	0.629253693	unnamed protein product, partial [Brassica oleracea]	ko01100//Metabolic pathways;ko00750//Vitamin B6 metabolism	-	-	-
MSTRG.39355	--	0	0.22	0.95	17.07	62.41	30.2	0.58	0	0	0.1933	36.56	0.39	-6.550648136	9.18E-07	8.59E-06	-1.012383724	0.730410828	0.980399641	BnaA10g29580D [Brassica napus]	-	-	-	-
MSTRG.39401	ZEU1	0.93	0.97	0.73	2.7	2.48	2.38	0.87	1.35	0.96	1.06	2.52	0.8767	-1.523323435	0.005994973	0.025220971	0.273963966	0.147376672	0.630344184	thymidylate kinase isoform X1 [Brassica rapa]	ko01100//Metabolic pathways;ko00240//Pyrimidine metabolism	-	-	-
MSTRG.39445	OVA6	0.31	0.24	0.17	0	0	0.06	1.48	0.83	1.37	1.2267	0.02	0.24	3.584962501	0.004674713	0.020341659	2.353636955	2.21E-06	9.25E-05	proline--tRNA ligase, chloroplastic/mitochondrial isoform X2 [Brassica napus]	ko00970//Aminoacyl-tRNA biosynthesis	GO:0009532//plastid stroma	GO:0004812//aminoacyl-tRNA ligase activity;GO:0032550//purine ribonucleoside binding	GO:0003006//developmental process involved in reproduction;GO:0006418//tRNA aminoacylation for protein translation;GO:0009668//plastid membrane organization;GO:0009791//post-embryonic development;GO:0015979//photosynthesis;GO:0048229//gametophyte development
MSTRG.3950	--	0.41	0.45	0.22	1.91	1.34	1.48	0.27	0.37	0.16	0.2667	1.5767	0.36	-2.130808871	0.001029926	0.005383078	-0.432959407	0.889951306	0.980399641	nucleolin [Brassica rapa]	-	-	-	GO:0007049//cell cycle;GO:0051052//regulation of DNA metabolic process
MSTRG.39623	--	1.71	2.37	2.68	0.13	0.21	0.25	2.53	1.68	3.86	2.69	0.1967	2.2533	3.518236387	5.66E-11	8.75E-10	0.255545427	0.175234183	0.684550164	hypothetical protein IGI04_036244 [Brassica rapa subsp. trilocularis] [Brassica rapa]	-	-	-	-
MSTRG.39702	--	0.96	0.33	0.35	0.23	0.26	0.18	0.44	0.4	0.28	0.3733	0.2233	0.5467	1.291462814	0.004944361	0.021342706	-0.550197083	0.751423213	0.980399641	unnamed protein product [Brassica rapa]	-	-	-	-
MSTRG.39854	--	1.63	2.4	1.42	0.2	0.33	0.28	0.72	0.87	0.87	0.82	0.27	1.8167	2.750262417	1.06E-09	1.44E-08	-1.147597914	0.082060129	0.465998819	sulfhydryl oxidase 1-like [Brassica napus]	-	GO:0030312//external encapsulating structure	GO:0016670//oxidoreductase activity, acting on a sulfur group of donors, oxygen as acceptor	GO:0006813//potassium ion transport;GO:0009651//response to salt stress;GO:0065007//biological regulation
MSTRG.39913	DTX25	5.02	5.03	5.83	2.42	1.95	2.73	4.19	4.19	4.97	4.45	2.3667	5.2933	1.161319983	3.43E-20	1.04E-18	-0.250371171	0.633494892	0.980399641	protein DETOXIFICATION 25 isoform X1 [Brassica rapa]	-	GO:0016020//membrane	GO:0022857//transmembrane transporter activity	-
MSTRG.39971	SIED1	2.07	2.7	2.51	0.15	0.33	0.24	1.24	2.26	1.26	1.5867	0.24	2.4267	3.337869639	3.54E-14	7.18E-13	-0.612976877	0.456681322	0.961160418	E3 ubiquitin-protein ligase [Arabidopsis thaliana]	-	GO:0043231//intracellular membrane-bounded organelle	-	GO:0009628//response to abiotic stimulus
MSTRG.40007	--	0.14	0.12	0.24	0.32	0.33	0.36	0.79	0.42	0.58	0.5967	0.3367	0.1667	-1.014355293	0.585534212	0.826330197	1.839959587	0.000275796	0.006312272	multidrug resistance protein 2 isoform X1 [Brassica rapa]	-	GO:0031224//intrinsic component of membrane	GO:0042895//antibiotic transporter activity	GO:0044763//single-organism cellular process;GO:0045491//xylan metabolic process
MSTRG.40015	--	0.1	0	0.35	0.46	8.6	1.84	0	0	0	0	3.6333	0.15	-4.598259323	0.001894609	0.009262176	-7.22881869	0.402780208	0.929774416	hypothetical protein HID58_024935 [Brassica napus]	-	-	-	-
MSTRG.40298	MINDY1	0.72	0.51	0.55	1.34	1.85	1.67	0.32	0.2	0.22	0.2467	1.62	0.5933	-1.449079073	0.013285591	0.049687446	-1.266280065	0.071786424	0.430816553	BnaA01g12730D [Brassica napus]	-	GO:0016020//membrane;GO:0043231//intracellular membrane-bounded organelle;GO:0044444//cytoplasmic part	-	-
MSTRG.4035	--	0.06	0.2	0	1.25	0.82	1.12	0	0	0	0	1.0633	0.0867	-3.616972896	0.000294474	0.001743778	-6.437405312	0.188401864	0.709372556	BnaUnng05000D, partial [Brassica napus]	-	-	-	-
MSTRG.40356	--	0.18	0.21	0.15	1.45	1.38	0.86	0.06	0.06	0.06	0.06	1.23	0.18	-2.772589504	0.003959646	0.017629489	-1.584962501	0.399657592	0.927758127	BnaCnng50530D [Brassica napus]	-	-	-	-
MSTRG.40380	DIT1	1.5	1.39	1.3	8.9	7.65	6.6	0.66	0.62	0.74	0.6733	7.7167	1.3967	-2.465990044	1.43E-19	4.19E-18	-1.052594951	0.023121873	0.209343044	dicarboxylate transporter 1, chloroplastic [Brassica napus]	-	GO:0009528//plastid inner membrane;GO:0031224//intrinsic component of membrane;GO:0031976//plastid thylakoid	GO:0015140//malate transmembrane transporter activity	GO:0006536//glutamate metabolic process;GO:0006694//steroid biosynthetic process;GO:0006970//response to osmotic stress;GO:0009746//response to hexose;GO:0015729//oxaloacetate transport;GO:0015743//malate transport;GO:0015813//L-glutamate transport;GO:0030001//metal ion transport;GO:0040007//growth;GO:0042044//fluid transport;GO:0042546//cell wall biogenesis;GO:0051273//beta-glucan metabolic proc…
MSTRG.40453	MYB3R4	0.73	0.8	0.67	3.9	3.96	3.93	0.62	0.58	0.66	0.62	3.93	0.7333	-2.421988289	2.03E-20	6.27E-19	-0.242200902	0.797440925	0.980399641	LOW QUALITY PROTEIN: transcription factor MYB3R-4-like [Brassica rapa]	-	-	-	-
MSTRG.40481	--	0.65	0.12	0.04	0.88	2.49	2.39	0.04	0	0	0.0133	1.92	0.27	-2.830074999	0.010084665	0.039305022	-4.339850003	0.040302822	0.30245032	BnaCnng38250D [Brassica napus]	-	-	-	-
MSTRG.40627	--	19.66	13.18	12.69	116.41	176.25	122.66	7.91	10.22	4.83	7.6533	138.44	15.1767	-3.189333983	1.86E-34	1.12E-32	-0.987694817	0.027194259	0.233952828	defensin-like protein 112 [Capsella rubella]	-	-	-	-
MSTRG.40628	--	1.36	1.64	1.08	20.64	65.47	22.08	0.47	1.45	0	0.64	36.0633	1.36	-4.728854195	1.27E-16	3.09E-15	-1.087462841	0.434610209	0.947151922	unnamed protein product [Brassica rapa]	-	-	-	-
MSTRG.40649	--	6.44	5.04	5.53	56.91	91.6	60.63	3.15	2.81	2.78	2.9133	69.7133	5.67	-3.620013971	1.37E-48	1.32E-46	-0.960677956	0.008891741	0.104505689	unnamed protein product [Brassica napus]	-	-	-	-
MSTRG.40651	--	7.93	4.5	5.93	106.84	252.65	127.76	1.86	3.43	2	2.43	162.4167	6.12	-4.730024222	5.26E-19	1.48E-17	-1.332575339	0.020883217	0.195402302	BnaC03g66980D [Brassica napus]	-	-	-	-
MSTRG.40711	ROPGEF5	0.36	0.32	0.74	0	0	0	0.65	0.74	0.24	0.5433	0	0.4733	8.886712714	2.18E-06	1.93E-05	0.198981035	0.467139018	0.965758123	rop guanine nucleotide exchange factor 5 [Brassica rapa]	-	-	-	-
MSTRG.40820	--	3.97	3.83	3.65	1.26	1.4	1.15	4.75	3.5	3.8	4.0167	1.27	3.8167	1.587484695	4.32E-18	1.15E-16	0.073685548	0.072256887	0.432545686	-	-	-	-	-
MSTRG.4091	--	10.36	10.53	10.62	25.82	22.52	28.52	7.99	10.7	9.54	9.41	25.62	10.5033	-1.286423222	0.000154518	0.000974479	-0.158580626	0.415005314	0.936448379	BnaC05g01130D [Brassica napus]	-	-	-	-
MSTRG.41061	--	0.37	0.2	0.39	2.69	3.34	2.55	0.21	0.16	0.08	0.15	2.86	0.32	-3.159871337	1.87E-11	3.01E-10	-1.093109404	0.309290098	0.857192816	BnaC05g50200D [Brassica napus]	-	-	-	-
MSTRG.41112	--	1.14	1.35	1.27	1.24	0.78	2.09	2.92	1.94	4.09	2.9833	1.37	1.2533	-0.128405732	0.269902198	0.519357825	1.25115502	2.09E-05	0.000676943	PREDICTED: cysteine-rich and transmembrane domain-containing protein A [Brassica oleracea var. oleracea] [Brassica oleracea]	-	GO:0016020//membrane	-	GO:0006605//protein targeting;GO:0009891//positive regulation of biosynthetic process;GO:0043067//regulation of programmed cell death
MSTRG.41204	HSP70-2	16.75	17.72	15.18	37.66	38.09	27.43	12.43	12.94	10.13	11.8333	34.3933	16.55	-1.055297729	0.002470252	0.011673961	-0.483974693	0.194482084	0.719359142	probable mediator of RNA polymerase II transcription subunit 37e [Brassica napus]	ko04141//Protein processing in endoplasmic reticulum;ko03040//Spliceosome;ko04144//Endocytosis	GO:0005576//extracellular region;GO:0005840//ribosome;GO:0005911//cell-cell junction;GO:0009536//plastid;GO:0030312//external encapsulating structure;GO:0031090//organelle membrane	GO:0016628//oxidoreductase activity, acting on the CH-CH group of donors, NAD or NADP as acceptor;GO:0019899//enzyme binding;GO:0032550//purine ribonucleoside binding	GO:0006006//glucose metabolic process;GO:0006090//pyruvate metabolic process;GO:0006970//response to osmotic stress;GO:0009617//response to bacterium;GO:0009620//response to fungus;GO:0010029//regulation of seed germination;GO:0010038//response to metal ion;GO:0010118//stomatal movement;GO:0010468//regulation of gene expression;GO:0034645//cellular macromolecule biosynthetic process;GO:0044267//c…
MSTRG.41241	--	1.5	2.06	1.57	6.71	6.14	6.19	1.22	0.58	0.78	0.86	6.3467	1.71	-1.892002748	6.01E-07	5.77E-06	-0.99158776	0.147974991	0.631742149	BnaA10g27460D [Brassica napus]	-	-	-	-
MSTRG.41268	--	6.16	5.03	6.98	0	0	0	11.39	10.9	13.54	11.9433	0	6.0567	12.5643083	1.32E-25	5.37E-24	0.979609624	2.22E-17	5.82E-15	methylsterol monooxygenase 2-1-like [Brassica napus]	ko01100//Metabolic pathways;ko01110//Biosynthesis of secondary metabolites;ko00100//Steroid biosynthesis	-	-	-
MSTRG.4128	RLP35	0.32	0.33	0.1	0.03	0	0.03	0.34	0.45	0.32	0.37	0.02	0.25	3.64385619	1.37E-05	0.000105826	0.565597176	0.09256781	0.498546749	receptor-like protein 12 [Brassica napus]	-	-	-	-
MSTRG.41311	MYB4	0.19	0.18	0.29	2.13	1.42	1.42	0.23	0.53	0.54	0.4333	1.6567	0.22	-2.912707922	0.000610797	0.003371065	0.977973694	0.133819087	0.601456133	transcription repressor MYB4-like [Brassica napus]	ko04626//Plant-pathogen interaction	GO:0043231//intracellular membrane-bounded organelle	GO:0001071//nucleic acid binding transcription factor activity;GO:0003676//nucleic acid binding	GO:0001101//response to acid chemical;GO:0006355//regulation of transcription, DNA-templated;GO:0006575//cellular modified amino acid metabolic process;GO:0006595//polyamine metabolic process;GO:0006970//response to osmotic stress;GO:0009411//response to UV;GO:0009699//phenylpropanoid biosynthetic process;GO:0009725//response to hormone;GO:0009962//regulation of flavonoid biosynthetic process;GO:…
MSTRG.41381	--	0.23	0.1	0	7.98	6.01	5.47	0	0	0	0	6.4867	0.11	-5.881901875	1.84E-08	2.17E-07	-6.781359714	0.599072671	0.980399641	PREDICTED: probable histone H2A.7 [Raphanus sativus]	-	GO:0000775//chromosome, centromeric region;GO:0000785//chromatin;GO:0005911//cell-cell junction	GO:0005488//binding	GO:0006325//chromatin organization
MSTRG.41404	PGD1	4.68	5.71	4.38	12.22	13.94	12.27	3.51	3.98	2.74	3.41	12.81	4.9233	-1.37956315	5.41E-06	4.49E-05	-0.529863681	0.299748248	0.848094552	BnaA09g11480D [Brassica napus]	ko01100//Metabolic pathways;ko01110//Biosynthesis of secondary metabolites;ko01200//Carbon metabolism;ko00480//Glutathione metabolism;ko00030//Pentose phosphate pathway	GO:0009532//plastid stroma	GO:0000166//nucleotide binding;GO:0016616//oxidoreductase activity, acting on the CH-OH group of donors, NAD or NADP as acceptor;GO:0048037//cofactor binding	GO:0006739//NADP metabolic process;GO:0006970//response to osmotic stress;GO:0009664//plant-type cell wall organization;GO:0010383//cell wall polysaccharide metabolic process;GO:0019520//aldonic acid metabolic process
MSTRG.4145	FAD2	4.27	4.93	3.94	2.18	1.63	1.92	2.23	3.61	3.23	3.0233	1.91	4.38	1.197358232	5.78E-17	1.44E-15	-0.53479082	0.370406442	0.908434464	omega-6 fatty acid desaturase, endoplasmic reticulum-like [Brassica napus]	ko01212//Fatty acid metabolism;ko01040//Biosynthesis of unsaturated fatty acids	GO:0031090//organelle membrane;GO:0031224//intrinsic component of membrane;GO:0043231//intracellular membrane-bounded organelle	GO:0016705//oxidoreductase activity, acting on paired donors, with incorporation or reduction of molecular oxygen	GO:0006633//fatty acid biosynthetic process
MSTRG.41528	--	12.94	16.45	11.08	38.92	41.73	36.4	7.09	10.75	9.89	9.2433	39.0167	13.49	-1.53220018	1.76E-12	3.11E-11	-0.545405233	0.202668754	0.731927202	BnaCnng70710D [Brassica napus]	-	-	-	-
MSTRG.41535	--	2.17	0.57	5.98	0.3	0.14	0.21	4.55	5.68	6.84	5.69	0.2167	2.9067	3.745816512	3.08E-09	3.97E-08	0.969063018	0.148577725	0.632864053	PREDICTED: monoacylglycerol lipase ABHD6-like [Brassica oleracea var. oleracea] [Brassica oleracea]	-	-	GO:0003824//catalytic activity	GO:0030001//metal ion transport
MSTRG.41590	TLP1	0.22	0.45	0.29	5.78	4.37	4.43	0.26	0	0.39	0.2167	4.86	0.32	-3.924812504	4.51E-12	7.69E-11	-0.562594688	0.863937249	0.980399641	PREDICTED: thaumatin-like protein 1b [Brassica oleracea var. oleracea] [Brassica oleracea]	-	GO:0031224//intrinsic component of membrane	-	GO:0043207//response to external biotic stimulus
MSTRG.4163	CCT7	16.77	15.7	14.23	39.26	40.48	35.19	14.02	12.9	13.4	13.44	38.31	15.5667	-1.299260977	9.22E-10	1.26E-08	-0.211926911	0.285332486	0.833909633	PREDICTED: T-complex protein 1 subunit eta-like [Raphanus sativus]	-	GO:0044444//cytoplasmic part	GO:0005515//protein binding;GO:0032550//purine ribonucleoside binding;GO:0042623//ATPase activity, coupled	GO:0006006//glucose metabolic process;GO:0006090//pyruvate metabolic process;GO:0006725//cellular aromatic compound metabolic process;GO:0006970//response to osmotic stress;GO:0010038//response to metal ion;GO:0044267//cellular protein metabolic process;GO:0071555//cell wall organization
MSTRG.41680	At5g57670	2.02	1.41	1.65	0.11	0.27	0.15	1.16	1.42	0.76	1.1133	0.1767	1.6933	3.260764232	2.71E-18	7.33E-17	-0.604980394	0.418898639	0.937510072	receptor-like cytosolic serine/threonine-protein kinase RBK2 isoform X2 [Brassica rapa]	-	GO:0016020//membrane;GO:0043231//intracellular membrane-bounded organelle	GO:0004672//protein kinase activity;GO:0032550//purine ribonucleoside binding	GO:0006464//cellular protein modification process;GO:0006796//phosphate-containing compound metabolic process;GO:0009755//hormone-mediated signaling pathway
MSTRG.41784	--	0.09	0.16	0.16	0.99	1.21	0.82	0	0.1	0	0.0333	1.0067	0.1367	-2.880852735	0.000229884	0.001396641	-2.03562391	0.255482451	0.802122205	Zinc finger RING-type [Arabidopsis suecica]	ko04141//Protein processing in endoplasmic reticulum	-	GO:0046914//transition metal ion binding	-
MSTRG.41785	--	0.75	1.24	0.65	0.17	0	0.21	0.88	0.99	1.03	0.9667	0.1267	0.88	2.796466606	0.001295642	0.006604539	0.135514971	0.479458902	0.969360361	At4g33800-like protein [Brassica napus]	-	GO:0043231//intracellular membrane-bounded organelle	-	-
MSTRG.41791	--	1.65	0.91	0.75	5.4	6.73	5.34	0.06	0.54	0.86	0.4867	5.8233	1.1033	-2.399976486	2.11E-05	0.000156871	-1.180862848	0.349768353	0.893053022	BnaC04g21690D [Brassica napus]	-	-	-	-
MSTRG.4194	FBL23	2.68	2.25	1.91	5.41	5.46	4.37	1.99	1.66	1.68	1.7767	5.08	2.28	-1.155794673	0.011224303	0.043062697	-0.359860792	0.930522832	0.984964204	F-box protein SKIP19 [Brassica rapa]	-	GO:0043231//intracellular membrane-bounded organelle	-	GO:0019941//modification-dependent protein catabolic process
MSTRG.42030	At5g46871	0.26	0.06	0.51	1.81	2.05	2.32	0.44	0.14	0.2	0.26	2.06	0.2767	-2.896423597	0.001633224	0.008112519	-0.089637212	0.852052313	0.980399641	BnaA08g04760D [Brassica napus]	-	-	-	GO:0001906//cell killing;GO:0009620//response to fungus
MSTRG.42038	--	2.46	1.58	3.38	0	0	0	3.78	3.76	4.65	4.0633	0	2.4733	11.27224097	3.26E-08	3.73E-07	0.716207034	0.027087605	0.233644992	LOW QUALITY PROTEIN: hypothetical protein HID58_013523 [Brassica napus]	-	-	-	-
MSTRG.42091	--	3.44	4.15	2.86	11.7	10.45	14.33	0.51	1.14	0.39	0.68	12.16	3.4833	-1.803602787	7.49E-06	6.05E-05	-2.356861885	8.90E-05	0.002399826	BnaC06g06660D [Brassica napus]	-	-	-	-
MSTRG.42102	MAM1	0	0.05	0	1.24	1.46	0.67	0	0	0	0	1.1233	0.0167	-6.074676686	2.65E-06	2.31E-05	-4.058893689	0.742419751	0.980399641	methylthioalkylmalate synthase 2, chloroplastic [Eutrema salsugineum]	ko01110//Biosynthesis of secondary metabolites;ko01210//2-Oxocarboxylic acid metabolism;ko00966//Glucosinolate biosynthesis	GO:0009526//plastid envelope	GO:0046912//transferase activity, transferring acyl groups, acyl groups converted into alkyl on transfer	GO:0000097//sulfur amino acid biosynthetic process;GO:0006551//leucine metabolic process;GO:0006950//response to stress;GO:0009683//indoleacetic acid metabolic process;GO:0019758//glycosinolate biosynthetic process;GO:0051707//response to other organism
MSTRG.42108	--	0.24	0.3	0.56	1.91	1.98	2.42	0.18	0.11	0	0.0967	2.1033	0.3667	-2.520136481	2.13E-05	0.000158349	-1.923378718	0.081457362	0.464189342	mutant gag-pol polyprotein [Gossypium australe]	-	-	-	-
MSTRG.42124	--	0.72	0.46	0.63	0.06	0.12	0.08	0.92	0.89	1.02	0.9433	0.0867	0.6033	2.799406169	2.77E-08	3.19E-07	0.644812356	0.009249114	0.107686963	BnaC05g29090D [Brassica napus]	-	-	-	-
MSTRG.42125	--	10.38	8.83	8.81	1.88	2.28	2.03	13.84	9.01	10.36	11.07	2.0633	9.34	2.178445641	2.78E-26	1.17E-24	0.245160767	0.011951067	0.130157241	hypothetical protein DY000_02003931 [Brassica cretica]	-	-	-	-
MSTRG.42133	REM15.15	0.97	0.11	0.22	0	0	0	0	1.05	0.29	0.4467	0	0.4333	8.759333407	0.000434308	0.002475498	0.043721377	0.759081022	0.980399641	B3 domain-containing protein REM10-like [Brassica napus]	-	-	-	-
MSTRG.42175	GSTT3	0.05	0.11	0.13	1.15	1.99	2.81	0.09	0.03	0.02	0.0467	1.9833	0.0967	-4.358764863	9.53E-10	1.30E-08	-1.050626073	0.613849348	0.980399641	PREDICTED: glutathione S-transferase T3-like [Brassica oleracea var. oleracea] [Brassica oleracea]	-	-	-	-
MSTRG.4218	XTH9	0	0	0	0.91	1.02	1.26	0	0	0	0	1.0633	0	-10.05437821	0.003390099	0.015395116	0	1	1	xyloglucan endotransglucosylase/hydrolase protein 9 [Brassica napus]	-	GO:0005576//extracellular region;GO:0030312//external encapsulating structure	GO:0016758//transferase activity, transferring hexosyl groups;GO:0016787//hydrolase activity	GO:0044042//glucan metabolic process;GO:0045229//external encapsulating structure organization;GO:0048509//regulation of meristem development
MSTRG.42274	POPTRDRAFT_746969	1.09	0.45	0.44	2.92	2.64	1.69	0.28	0.36	0.13	0.2567	2.4167	0.66	-1.872480565	0.009914197	0.038727348	-1.362570079	0.173448865	0.68127587	PREDICTED: pollen-specific leucine-rich repeat extensin-like protein 2 [Brassica oleracea var. oleracea] [Brassica oleracea]	ko01100//Metabolic pathways;ko01110//Biosynthesis of secondary metabolites;ko01230//Biosynthesis of amino acids;ko01210//2-Oxocarboxylic acid metabolism;ko00220//Arginine biosynthesis	-	-	-
MSTRG.42277	KAT2	0	0	0	0.19	0.89	0.07	0	0	0	0	0.3833	0	-8.582455645	0.012819509	0.048214118	0	1	1	PREDICTED: potassium channel KAT2-like [Brassica oleracea var. oleracea] [Brassica oleracea]	-	GO:0031224//intrinsic component of membrane;GO:0043231//intracellular membrane-bounded organelle	GO:0000166//nucleotide binding;GO:0005249//voltage-gated potassium channel activity	GO:0030001//metal ion transport;GO:0034220//ion transmembrane transport
MSTRG.42335	XTH29	0.73	0.6	0.83	2.69	2.74	2.94	0.43	0.54	0.45	0.4733	2.79	0.72	-1.95419631	0.001582158	0.007886528	-0.605140383	0.663809241	0.980399641	probable xyloglucan endotransglucosylase/hydrolase protein 29 isoform X1 [Brassica rapa]	-	GO:0005576//extracellular region;GO:0030312//external encapsulating structure	GO:0016758//transferase activity, transferring hexosyl groups;GO:0016787//hydrolase activity	GO:0044042//glucan metabolic process;GO:0045229//external encapsulating structure organization
MSTRG.42369	--	0.43	0.6	0.26	2.08	1.58	1.32	0.22	0.32	0.36	0.3	1.66	0.43	-1.948774677	0.002136935	0.010297396	-0.519374159	0.738645746	0.980399641	Harbinger transposase-derived protein [Arabidopsis suecica]	-	-	-	-
MSTRG.42674	--	1.03	1.17	1.03	0.43	0.22	0.68	0.46	1.33	0.5	0.7633	0.4433	1.0767	1.280107919	0.008238935	0.033107522	-0.496186567	0.822259574	0.980399641	hypothetical protein HID58_083686, partial [Brassica napus]	-	-	-	-
MSTRG.42706	CRK11	0.27	0.02	0.12	1.51	1.38	1.67	0	0.03	0	0.01	1.52	0.1367	-3.47533801	3.17E-06	2.73E-05	-3.772589504	0.061726549	0.394087628	cysteine-rich receptor-like protein kinase 11 isoform X4 [Brassica rapa]	-	-	-	-
MSTRG.4275	TPK1	1.36	1.11	1.66	4.23	2.82	3.97	0.93	0.86	1.39	1.06	3.6733	1.3767	-1.415910537	0.010260265	0.039870381	-0.377115016	0.903840513	0.980399641	BnaUnng01760D [Brassica napus]	-	GO:0009526//plastid envelope;GO:0009532//plastid stroma	GO:0046914//transition metal ion binding	GO:0009725//response to hormone;GO:0044699//single-organism process
MSTRG.42844	--	0	0	0	0.32	0.4	0.16	0	0	0	0	0.2933	0	-8.196397213	0.003174856	0.014529554	0	1	1	hypothetical protein DY000_02038204 [Brassica cretica]	-	-	-	-
MSTRG.42908	LCR30	7.81	8.15	4.95	13.36	12.68	14.2	1.36	1.5	0.76	1.2067	13.4133	6.97	-0.944437243	0.198576884	0.419440449	-2.53013146	7.19E-07	3.41E-05	defensin-like protein 122 [Eutrema salsugineum]	-	-	-	-
MSTRG.42910	LCR30	14.66	13.46	13.44	27.82	39.49	31.32	8.7	9.59	8.29	8.86	32.8767	13.8533	-1.246830879	0.001316481	0.006696874	-0.64485455	0.139386499	0.614019037	defensin-like protein 122 [Eutrema salsugineum]	-	-	-	-
MSTRG.4292	At3g10195	0	0.56	0	5.37	12.3	11.23	0	0	0	0	9.6333	0.1867	-5.689498855	4.06E-09	5.17E-08	-7.544320516	0.499291474	0.977593688	BnaC01g38780D [Brassica napus]	-	-	-	-
MSTRG.4304	--	89.5	76.42	65.42	184.52	333.11	230.55	62.2	75.1	61.96	66.42	249.3933	77.1133	-1.693370663	8.82E-08	9.53E-07	-0.215362609	0.36843464	0.90778178	BnaC01g38920D [Brassica napus]	-	-	-	-
MSTRG.43304	At1g68905	0	0	0	0.74	2.19	4.53	0	0	0	0	2.4867	0	-11.27999741	5.16E-06	4.30E-05	0	1	1	BnaCnng48430D [Brassica napus]	-	-	-	-
MSTRG.43327	DXS	4.9	5.95	4.87	8.52	9.33	9.46	1.99	3.35	2.27	2.5367	9.1033	5.24	-0.796828097	0.209983748	0.43615704	-1.046632859	0.000471159	0.009904107	PREDICTED: 1-deoxy-D-xylulose-5-phosphate synthase, chloroplastic [Brassica oleracea var. oleracea] [Brassica oleracea]	ko01100//Metabolic pathways;ko01110//Biosynthesis of secondary metabolites;ko00900//Terpenoid backbone biosynthesis;ko00730//Thiamine metabolism	GO:0009532//plastid stroma	GO:0016744//transferase activity, transferring aldehyde or ketonic groups;GO:0043169//cation binding	GO:0000097//sulfur amino acid biosynthetic process;GO:0006090//pyruvate metabolic process;GO:0006355//regulation of transcription, DNA-templated;GO:0006468//protein phosphorylation;GO:0006544//glycine metabolic process;GO:0006633//fatty acid biosynthetic process;GO:0006732//coenzyme metabolic process;GO:0006753//nucleoside phosphate metabolic process;GO:0006772//thiamine metabolic process;GO:0006…
MSTRG.43360	CYS4	8.84	7.75	10.39	1.46	0.86	1.7	11.07	11.1	10.66	10.9433	1.34	8.9933	2.746622942	3.11E-35	1.93E-33	0.283124402	0.000238873	0.00558184	cysteine proteinase inhibitor 4 isoform X2 [Brassica rapa]	-	GO:0030312//external encapsulating structure	GO:0004866//endopeptidase inhibitor activity	GO:0010466//negative regulation of peptidase activity
MSTRG.43372	--	2.77	3.26	2.96	1.26	1.4	1.03	3.83	4.65	3.89	4.1233	1.23	2.9967	1.284700299	4.18E-08	4.71E-07	0.460452479	0.006151686	0.079453752	unnamed protein product [Brassica napus]	-	-	-	-
MSTRG.43441	--	0	0	0	1.77	1.18	0.76	0	0	0	0	1.2367	0	-10.27224097	4.34E-05	0.00030521	0	1	1	PREDICTED: thioredoxin-2-like [Raphanus sativus]	-	-	-	-
MSTRG.43479	At1g62810	1.76	1.24	1.21	4.78	4.43	4.8	0.71	0.79	0.39	0.63	4.67	1.4033	-1.734564817	2.76E-10	3.97E-09	-1.155433999	0.006021112	0.0780575	PREDICTED: primary amine oxidase [Brassica oleracea var. oleracea] [Brassica oleracea]	ko01100//Metabolic pathways;ko01110//Biosynthesis of secondary metabolites;ko00260//Glycine, serine and threonine metabolism;ko00360//Phenylalanine metabolism;ko00410//beta-Alanine metabolism;ko00350//Tyrosine metabolism;ko00960//Tropane, piperidine and pyridine alkaloid biosynthesis;ko00950//Isoquinoline alkaloid biosynthesis	-	GO:0016641//oxidoreductase activity, acting on the CH-NH2 group of donors, oxygen as acceptor;GO:0046914//transition metal ion binding;GO:0048037//cofactor binding	GO:0044710//single-organism metabolic process;GO:1901564//organonitrogen compound metabolic process
MSTRG.43490	RH1	0.85	1.04	0.78	3.05	3.48	3.29	0.89	0.72	0.78	0.7967	3.2733	0.89	-1.878883283	5.34E-07	5.18E-06	-0.159829124	0.643504941	0.980399641	PREDICTED: DEAD-box ATP-dependent RNA helicase 1 isoform X1 [Brassica oleracea var. oleracea] [Brassica oleracea]	-	-	GO:0003676//nucleic acid binding;GO:0019899//enzyme binding;GO:0032550//purine ribonucleoside binding;GO:0042623//ATPase activity, coupled	GO:0000338//protein deneddylation;GO:0003006//developmental process involved in reproduction;GO:0006405//RNA export from nucleus;GO:0006605//protein targeting;GO:0009639//response to red or far red light
MSTRG.43515	OBGL	1.44	1.57	1.37	4.62	3.67	4.22	0.41	0.79	0.2	0.4667	4.17	1.46	-1.514079015	0.000369993	0.002145361	-1.645504043	0.009595633	0.110481037	GTP1/OBG domain [Arabidopsis thaliana x Arabidopsis arenosa]	-	-	-	GO:0009987//cellular process
MSTRG.43544	--	0.92	0.83	1.44	1.13	1.2	1.17	4.21	2.98	4.44	3.8767	1.1667	1.0633	-0.133798498	0.203624249	0.426885337	1.866222768	2.38E-11	2.72E-09	Transposon En/Spm-like [Arabidopsis thaliana x Arabidopsis arenosa]	-	-	-	-
MSTRG.4356	--	19.65	17.61	13.59	36.69	39.4	33.91	25.37	16.87	18.62	20.2867	36.6667	16.95	-1.113183845	0.004784308	0.020748592	0.25924656	0.007233604	0.089708029	unnamed protein product [Triticum turgidum subsp. durum] [Triticum turgidum]	-	-	-	-
MSTRG.43584	--	0	0.05	0.2	0	0	0	1.04	0.67	0.93	0.88	0	0.0833	6.380821784	0.195731256	0.415151221	3.40053793	0.00017012	0.004155676	BnaC09g52420D [Brassica napus]	ko03420//Nucleotide excision repair;ko03440//Homologous recombination;ko03030//DNA replication;ko03430//Mismatch repair	-	-	-
MSTRG.43682	--	6.69	6.16	7.38	9.36	10.83	11.52	2.97	3.24	2.1	2.77	10.57	6.7433	-0.648441558	0.932989094	0.988769879	-1.283575938	1.94E-05	0.000633888	unnamed protein product [Brassica napus]	-	-	-	-
MSTRG.43719	VPS45	0.93	0.63	0.74	5.56	4.37	4.43	0.21	0.16	0.56	0.31	4.7867	0.7667	-2.642349983	1.08E-11	1.78E-10	-1.30633124	0.125992314	0.583735121	vacuolar protein sorting-associated protein 45 homolog isoform X2 [Brassica napus]	ko04144//Endocytosis	GO:0005774//vacuolar membrane;GO:0031984//organelle subcompartment	GO:0005488//binding;GO:0022892//substrate-specific transporter activity	GO:0006605//protein targeting;GO:0006865//amino acid transport;GO:0015672//monovalent inorganic cation transport;GO:0015748//organophosphate ester transport;GO:0016482//cytoplasmic transport;GO:0043067//regulation of programmed cell death;GO:0048278//vesicle docking;GO:0051049//regulation of transport;GO:0051707//response to other organism;GO:0061024//membrane organization;GO:0070838//divalent me…
MSTRG.43741	--	3.58	4.7	4.42	9.74	10.17	10.41	2.11	3.68	2.16	2.65	10.1067	4.2333	-1.255441257	0.000383843	0.002218274	-0.675801731	0.199782746	0.728136066	BnaC01g23620D [Brassica napus]	-	-	-	-
MSTRG.43764	DLD	1.36	1.46	2.09	0.55	0.34	0.71	1.33	0.6	1.41	1.1133	0.5333	1.6367	1.617651119	1.08E-06	9.99E-06	-0.555874922	0.620849579	0.980399641	D-lactate dehydrogenase [cytochrome], mitochondrial-like [Jatropha curcas]	ko00620//Pyruvate metabolism	GO:0043231//intracellular membrane-bounded organelle	GO:0000166//nucleotide binding;GO:0003973//(S)-2-hydroxy-acid oxidase activity;GO:0004457//lactate dehydrogenase activity;GO:0005515//protein binding;GO:0016616//oxidoreductase activity, acting on the CH-OH group of donors, NAD or NADP as acceptor;GO:0032550//purine ribonucleoside binding	GO:0009438//methylglyoxal metabolic process
MSTRG.43801	--	0.42	1.06	0.31	0.11	0.18	0.09	0.34	0.06	0.24	0.2133	0.1267	0.5967	2.235888264	0.002958807	0.013654106	-1.483815777	0.251959771	0.798188702	hypothetical protein DY000_02055226 [Brassica cretica]	-	-	-	-
MSTRG.43809	--	0.39	0.11	0.54	0.03	0.03	0.06	0.39	0.57	0.54	0.5	0.04	0.3467	3.115477217	0.000555266	0.003094016	0.528378972	0.203401635	0.733041204	HR-like lesion-inducer [Arabidopsis thaliana x Arabidopsis arenosa]	-	GO:0043231//intracellular membrane-bounded organelle	-	GO:0009605//response to external stimulus;GO:0009628//response to abiotic stimulus;GO:0033554//cellular response to stress;GO:0044699//single-organism process;GO:1901700//response to oxygen-containing compound
MSTRG.43919	GSTT3	1.12	0.75	0.81	3.9	3.48	4.61	0.25	0.38	0.29	0.3067	3.9967	0.8933	-2.161526753	1.99E-11	3.19E-10	-1.542527234	0.001282691	0.022553132	Harbinger transposase-derived protein [Arabidopsis suecica]	-	-	-	-
MSTRG.4393	--	1.28	1.53	1.85	0.96	0.79	0.32	1.26	1.07	1.09	1.14	0.69	1.5533	1.170699187	0.000192589	0.001192077	-0.44633363	0.749906032	0.980399641	unnamed protein product [Brassica rapa]	-	-	-	-
MSTRG.43940	--	0.53	0.35	0.17	1.77	2.13	2.3	0.32	0.14	0.13	0.1967	2.0667	0.35	-2.561878888	0.001479863	0.00743384	-0.831602468	0.658617328	0.980399641	hypothetical protein F2Q69_00015792 [Brassica cretica]	-	-	-	-
MSTRG.43955	--	0.5	0.88	0.79	4.11	2.82	2.54	0.4	0.82	0.57	0.5967	3.1567	0.7233	-2.125669383	0.000577327	0.003205188	-0.277735455	0.93017287	0.984905296	BnaC09g52780D [Brassica napus]	-	-	-	-
MSTRG.43976	--	1.1	0.33	0.45	3.25	3.68	2.72	0.41	0.49	0.55	0.4833	3.2167	0.6267	-2.35979628	7.27E-05	0.000488705	-0.374679762	0.960378981	0.992206019	unnamed protein product, partial [Brassica napus]	-	-	-	-
MSTRG.44007	--	7.56	5.63	5.39	14.44	16.63	20.24	3.96	4.72	5.67	4.7833	17.1033	6.1933	-1.465489524	0.000333262	0.001952709	-0.372699765	0.897762297	0.980399641	hypothetical protein HID58_043276 [Brassica napus]	-	-	-	-
MSTRG.44080	--	11.5	11.45	11.53	0.67	0.64	0.45	16.46	16.38	16.2	16.3467	0.5867	11.4933	4.29211244	8.77E-214	8.94E-211	0.508199205	5.96E-24	3.10E-21	probable serine/threonine-protein kinase At1g09600, partial [Brassica napus]	-	-	-	-
MSTRG.44166	At4g16620	0.98	0.82	0.74	3.81	3.41	3.15	0.31	0.76	0.33	0.4667	3.4567	0.8467	-2.029515492	3.76E-07	3.72E-06	-0.85940167	0.279536343	0.829336269	WAT1-related protein At4g16620-like [Brassica napus]	-	GO:0044444//cytoplasmic part	-	-
MSTRG.44172	--	4.71	5.04	5.88	6.35	5.09	6.96	1.05	0.74	0.89	0.8933	6.1333	5.21	-0.235387988	0.011045032	0.042483199	-2.544012873	2.51E-37	4.85E-34	B-box zinc finger protein 18 [Brassica napus]	-	-	-	-
MSTRG.44195	RZ1B	0.34	0.37	0.19	1	1.05	1.04	0.3	0.26	0.54	0.3667	1.03	0.3	-1.779609932	0.009511889	0.037386577	0.289506617	0.303007879	0.851551801	PREDICTED: LOW QUALITY PROTEIN: glycine-rich RNA-binding protein RZ1B [Brassica oleracea var. oleracea] [Brassica oleracea]	ko03040//Spliceosome	-	GO:0005488//binding	-
MSTRG.44233	GID8	0.62	0.44	0.62	1.57	1.56	2.49	0.21	0.13	0.38	0.24	1.8733	0.56	-1.742108897	0.007427196	0.030312175	-1.222392421	0.172107283	0.678406004	PREDICTED: LOW QUALITY PROTEIN: glucose-induced degradation protein 8 homolog [Brassica oleracea var. oleracea] [Brassica oleracea]	-	GO:0043231//intracellular membrane-bounded organelle	-	-
MSTRG.44345	--	0.49	0.76	0.52	4.06	2.64	3.72	0.17	0.05	0.09	0.1033	3.4733	0.59	-2.557534012	0.000219834	0.001340751	-2.51340924	0.105696605	0.535364365	PREDICTED: serine/threonine-protein kinase GRIK2 [Raphanus sativus]	-	-	-	-
MSTRG.44406	--	0.39	0.11	0.29	0.02	0.04	0.02	0.39	0.21	0.32	0.3067	0.0267	0.2633	3.303780748	0.000259518	0.001556642	0.219781208	0.427679415	0.942859829	unnamed protein product [Brassica napus]	-	-	-	-
MSTRG.44423	TRB2	0.98	1.38	0.71	0.22	0.31	0.1	0.93	0.83	0.58	0.78	0.21	1.0233	2.284814922	7.10E-07	6.74E-06	-0.391730126	0.907814455	0.980399641	PREDICTED: telomere repeat-binding factor 2-like [Brassica oleracea var. oleracea] [Brassica oleracea]	ko04626//Plant-pathogen interaction	GO:0032991//macromolecular complex;GO:0043231//intracellular membrane-bounded organelle;GO:0043232//intracellular non-membrane-bounded organelle	GO:0003690//double-stranded DNA binding;GO:0003697//single-stranded DNA binding;GO:0043565//sequence-specific DNA binding;GO:0046983//protein dimerization activity	GO:0001101//response to acid chemical;GO:0006970//response to osmotic stress;GO:0009725//response to hormone;GO:0010038//response to metal ion
MSTRG.44483	--	0.53	0.24	0.23	5.4	11.09	3.31	0.13	0	0	0.0433	6.6	0.3333	-4.307428525	2.12E-06	1.88E-05	-2.943416472	0.237326319	0.781311566	BnaA01g27700D [Brassica napus]	-	-	-	-
MSTRG.44494	SN1	2.09	2.23	2.02	0.48	0.34	0.51	1.6	2.61	1.48	1.8967	0.4433	2.1133	2.253056595	5.61E-23	1.98E-21	-0.156054188	0.539960131	0.980399641	peamaclein-like [Brassica napus]	-	GO:0030312//external encapsulating structure	-	GO:0006950//response to stress;GO:0010476//gibberellin mediated signaling pathway
MSTRG.44509	--	0.68	1.01	0.65	0.42	0.22	0.26	0.65	0.95	0.54	0.7133	0.3	0.78	1.378511623	0.000324703	0.001906836	-0.128897733	0.698728911	0.980399641	SLL3 ORF2 protein [Brassica oleracea]	-	-	-	-
MSTRG.44567	--	17.64	18.18	17.43	6.78	6.33	6.12	27.29	22.75	24.59	24.8767	6.41	17.75	1.469422763	1.03E-49	1.03E-47	0.486974161	2.41E-10	2.31E-08	BnaA06g13120D [Brassica napus]	-	-	-	-
MSTRG.44619	--	1.8	0.42	0.63	0.65	1.55	3.99	0.16	0	0	0.0533	2.0633	0.95	-1.11897749	0.497998999	0.76041033	-4.154818109	0.001018427	0.01864845	hypothetical protein IGI04_007214 [Brassica rapa subsp. trilocularis] [Brassica rapa]	-	-	-	-
MSTRG.4473	SH3P3	1.77	1.59	1.52	11.38	8.57	8.33	0.79	0.71	0.87	0.79	9.4267	1.6267	-2.534829067	1.94E-21	6.33E-20	-1.041994089	0.020602301	0.193904618	SH3 domain-containing protein 3 [Eutrema salsugineum]	ko00910//Nitrogen metabolism	GO:0009536//plastid	GO:0016836//hydro-lyase activity;GO:0046914//transition metal ion binding	GO:0044699//single-organism process
MSTRG.44980	RE2	0.22	0.04	0.06	0.69	0.86	0.87	0.01	0.02	0	0.01	0.8067	0.1067	-2.918863237	4.84E-05	0.000336477	-3.415037499	0.014224661	0.147979663	01P13-1 [Brassica rapa subsp. pekinensis] [Brassica rapa]	-	-	-	-
MSTRG.45384	--	1.63	1.81	1.29	0.8	0.5	0.41	2.37	1.91	3.45	2.5767	0.57	1.5767	1.467843858	1.05E-05	8.28E-05	0.708628231	0.00559166	0.073786412	hypothetical protein F2Q69_00018697 [Brassica cretica]	-	-	-	-
MSTRG.45409	GATA29	0.23	0.21	0.04	2.8	2.76	2.84	0	0	0	0	2.8	0.16	-4.129283017	2.50E-09	3.26E-08	-7.321928095	0.073708113	0.437617359	PREDICTED: GATA transcription factor 29 [Brassica oleracea var. oleracea] [Brassica oleracea]	-	GO:0043231//intracellular membrane-bounded organelle	GO:0003677//DNA binding;GO:0046914//transition metal ion binding	GO:0010468//regulation of gene expression;GO:0034645//cellular macromolecule biosynthetic process
MSTRG.45506	RAB28	2.03	1.15	2.5	0	0	0.04	10.15	6.07	14.76	10.3267	0.0133	1.8933	7.14974712	7.13E-09	8.86E-08	2.447374309	1.17E-13	1.87E-11	PREDICTED: late embryogenesis abundant protein D-34-like [Brassica oleracea var. oleracea] [Brassica oleracea]	-	GO:0044444//cytoplasmic part	-	GO:0003006//developmental process involved in reproduction;GO:0006721//terpenoid metabolic process
MSTRG.45547	--	0.12	0.06	0.38	1.48	1.56	0.91	0.06	0.2	0.38	0.2133	1.3167	0.1867	-2.818353921	0.009803126	0.038368826	0.192645078	0.711247082	0.980399641	golgin subfamily A member 6-like protein 22 [Eutrema salsugineum]	-	-	-	-
MSTRG.45556	--	0.05	0.15	0.1	1.24	1.15	0.66	0.04	0.2	0.09	0.11	1.0167	0.1	-3.345774837	1.40E-05	0.000107736	0.137503524	0.632927047	0.980399641	Harbinger transposase-derived protein [Arabidopsis suecica]	-	-	-	-
MSTRG.45579	ABCG25	0.97	1.51	0.79	2.43	2.64	3.12	0.2	0.43	0.29	0.3067	2.73	1.09	-1.324572816	0.024854234	0.08388467	-1.829584869	0.002031112	0.032965252	ABC transporter G family member 25-like [Brassica napus]	-	GO:0031224//intrinsic component of membrane	GO:0015098//molybdate ion transmembrane transporter activity;GO:0015405//P-P-bond-hydrolysis-driven transmembrane transporter activity;GO:0017111//nucleoside-triphosphatase activity;GO:0032550//purine ribonucleoside binding	GO:0001101//response to acid chemical;GO:0015698//inorganic anion transport;GO:0015718//monocarboxylic acid transport;GO:0044763//single-organism cellular process
MSTRG.46018	OFUT39	13.76	12.76	13.12	4.01	2.73	4.13	19.52	14.12	16.91	16.85	3.6233	13.2133	1.866605022	1.55E-33	8.91E-32	0.35075413	4.50E-05	0.00131885	O-fucosyltransferase 39 isoform X2 [Brassica rapa]	-	-	GO:0016740//transferase activity	-
MSTRG.46019	OFUT39	10.16	8.42	11.15	3.93	2.91	2.95	14.95	13.16	17.05	15.0533	3.2633	9.91	1.602538698	4.76E-21	1.52E-19	0.603126023	1.02E-06	4.65E-05	O-fucosyltransferase 39 isoform X1 [Brassica rapa]	-	-	GO:0016740//transferase activity	-
MSTRG.46021	At5g65490	0	0	0.15	0	0.04	0	3.9	2.13	4.32	3.45	0.0133	0.05	1.906890596	0.513999639	0.768946921	6.108524457	2.16E-11	2.47E-09	PREDICTED: protein ecdysoneless homolog [Brassica oleracea var. oleracea] [Brassica oleracea]	-	GO:0009536//plastid	GO:0005488//binding;GO:0016740//transferase activity	GO:0006464//cellular protein modification process
MSTRG.46153	CER3	0.89	0.88	1.07	1.66	0.93	0.9	2.74	1.92	2.54	2.4	1.1633	0.9467	-0.297336107	0.333074975	0.597305686	1.342105977	2.63E-10	2.50E-08	PREDICTED: protein ECERIFERUM 3 [Brassica oleracea var. oleracea] [Brassica oleracea]	-	GO:0031090//organelle membrane;GO:0031224//intrinsic component of membrane;GO:0043231//intracellular membrane-bounded organelle	GO:0003824//catalytic activity;GO:0046914//transition metal ion binding	GO:0003006//developmental process involved in reproduction;GO:0006631//fatty acid metabolic process;GO:0007275//multicellular organism development;GO:0009058//biosynthetic process;GO:0043446//cellular alkane metabolic process
MSTRG.46242	LECRKS7	4.24	6.13	4.38	16.47	16.97	15.32	3.45	2.66	3.66	3.2567	16.2533	4.9167	-1.724983171	7.95E-10	1.10E-08	-0.594284487	0.302206911	0.850599951	PREDICTED: probable L-type lectin-domain containing receptor kinase S.7 [Brassica oleracea var. oleracea] [Brassica oleracea]	-	GO:0016020//membrane	GO:0004674//protein serine/threonine kinase activity;GO:0032550//purine ribonucleoside binding	GO:0006468//protein phosphorylation;GO:0044763//single-organism cellular process
MSTRG.4626	--	1.71	1.61	1.45	2.11	2.44	3.21	0	0	0.08	0.0267	2.5867	1.59	-0.702067386	0.883274281	0.968963079	-5.897845456	3.84E-05	0.001152236	hypothetical protein DY000_02061157 [Brassica cretica]	-	-	-	-
MSTRG.4627	--	0.09	0	0	0.41	0.47	0.32	0	0.04	0	0.0133	0.4	0.03	-3.736965594	0.009785414	0.038310271	-1.169925001	0.889974338	0.980399641	hypothetical protein F2Q69_00009146 [Brassica cretica]	-	-	-	-
MSTRG.46302	--	1.49	1.31	1.74	8.76	6.71	6.7	0.77	0.6	0.41	0.5933	7.39	1.5133	-2.287844568	1.04E-18	2.88E-17	-1.350815056	0.00035771	0.007855316	Harbinger transposase-derived protein [Arabidopsis suecica]	-	-	-	-
MSTRG.4639	--	2.56	2.47	2.5	1.01	1.08	1.25	2.61	2.04	2.81	2.4867	1.1133	2.51	1.172801762	1.19E-13	2.32E-12	-0.013474234	0.167631174	0.67065762	BnaC06g13970D [Brassica napus]	-	-	-	-
MSTRG.46396	RE1	5.1	4.71	4.32	0.35	0.24	0.08	5.41	5.17	4.57	5.05	0.2233	4.71	4.39845656	1.06E-29	5.24E-28	0.100556328	0.001018688	0.018648915	Integrase catalytic core [Arabidopsis suecica]	-	GO:0043231//intracellular membrane-bounded organelle	-	-
MSTRG.46397	RE1	1.96	2.71	2.67	0.8	1.07	1.73	1.74	2.9	2.5	2.38	1.2	2.4467	1.027783157	5.87E-12	9.89E-11	-0.039855989	0.131827435	0.596707682	Ribonuclease H-like superfamily [Arabidopsis suecica]	-	GO:0043231//intracellular membrane-bounded organelle	-	-
MSTRG.46426	YSL3	0.94	1.32	0.77	0.71	0.42	0.08	1	0.94	1.23	1.0567	0.4033	1.01	1.324310746	0.008394121	0.03362599	0.065165047	0.428967109	0.942859829	PREDICTED: metal-nicotianamine transporter YSL3-like isoform X1 [Raphanus sativus]	-	GO:0031224//intrinsic component of membrane	GO:0015197//peptide transporter activity;GO:0015603//iron chelate transmembrane transporter activity	GO:0009791//post-embryonic development;GO:0015833//peptide transport;GO:0022414//reproductive process;GO:0044763//single-organism cellular process;GO:0051707//response to other organism;GO:0055076//transition metal ion homeostasis
MSTRG.46442	--	0.47	0	1.47	22.98	20.33	18.23	0.89	0.3	0.47	0.5533	20.5133	0.6467	-4.987395886	0.000285193	0.001694467	-0.224873411	0.940486632	0.98723363	Harbinger transposase-derived protein [Arabidopsis suecica]	-	-	-	-
MSTRG.46443	--	1.16	0.17	0.51	13.69	10.09	9.06	0.18	0.21	0.49	0.2933	10.9467	0.6133	-4.157676456	4.66E-12	7.94E-11	-1.064130337	0.520811924	0.980399641	Harbinger transposase-derived protein [Arabidopsis suecica]	-	-	-	-
MSTRG.46606	--	3.95	4.15	4.15	0.55	0.52	0.47	4.4	3.71	5.23	4.4467	0.5133	4.0833	2.991779493	2.88E-28	1.34E-26	0.122976917	0.054676895	0.366188023	BnaA02g12610D [Brassica napus]	-	-	-	-
MSTRG.46641	--	5.35	6.26	4.64	12.44	13.48	15.91	2.48	1.47	1.85	1.9333	13.9433	5.4167	-1.36409828	0.001625492	0.008076994	-1.486314913	0.002306198	0.036443183	hypothetical protein HID58_046753 [Brassica napus]	-	-	-	-
MSTRG.46698	--	0.5	0.82	0.95	6.09	7.36	5.81	1.36	0.72	1.1	1.06	6.42	0.7567	-3.084843501	1.50E-08	1.79E-07	0.486334468	0.226298021	0.766274782	Integrase catalytic core [Arabidopsis suecica]	-	-	-	-
MSTRG.46728	At1g06360	1.23	1.06	1.16	0.55	0.45	0.44	2.09	1.57	1.73	1.7967	0.48	1.15	1.26052755	6.96E-06	5.67E-05	0.643688911	0.003556136	0.051798342	PREDICTED: delta-9 desaturase-like 5 protein [Brassica oleracea var. oleracea] [Brassica oleracea]	-	GO:0009536//plastid;GO:0031090//organelle membrane;GO:0031224//intrinsic component of membrane;GO:0044446//intracellular organelle part	GO:0015291//secondary active transmembrane transporter activity;GO:0042389//omega-3 fatty acid desaturase activity	GO:0000038//very long-chain fatty acid metabolic process;GO:0006090//pyruvate metabolic process;GO:0006633//fatty acid biosynthetic process;GO:0006779//porphyrin-containing compound biosynthetic process;GO:0006952//defense response;GO:0009625//response to insect;GO:0009644//response to high light intensity;GO:0015893//drug transport;GO:0016109//tetraterpenoid biosynthetic process;GO:0046471//phos…
MSTRG.46794	--	0.22	0.33	0.21	2.52	2.35	1.52	0.12	0.14	0.29	0.1833	2.13	0.2533	-3.071744608	3.27E-09	4.20E-08	-0.4665678	0.859129767	0.980399641	Harbinger transposase-derived protein [Arabidopsis suecica]	-	-	-	-
MSTRG.46817	--	1.53	1.11	1.48	6.35	7.28	6.12	0.83	0.88	0.53	0.7467	6.5833	1.3733	-2.261136411	1.67E-13	3.23E-12	-0.879145605	0.135706231	0.60529615	PREDICTED: dnaJ protein ERDJ2A [Raphanus sativus]	-	-	-	-
MSTRG.46841	nop14	6.69	5.64	5.05	13.61	14.55	12.53	6.02	5.38	6.49	5.9633	13.5633	5.7933	-1.227246198	4.02E-06	3.40E-05	0.041725305	0.011271636	0.124633063	PREDICTED: nucleolar protein 14 [Brassica oleracea var. oleracea] [Brassica oleracea]	-	GO:0043231//intracellular membrane-bounded organelle;GO:0044444//cytoplasmic part	-	GO:0009117//nucleotide metabolic process
MSTRG.46906	LIP4	0.46	0.48	0.17	1.23	1.45	1.23	0.78	0.3	0.57	0.55	1.3033	0.37	-1.816608931	0.011603059	0.044309293	0.571906348	0.131674386	0.596424362	PREDICTED: GDSL esterase/lipase LIP-4 [Brassica oleracea var. oleracea] [Brassica oleracea]	-	GO:0009532//plastid stroma	GO:0016788//hydrolase activity, acting on ester bonds	GO:0006629//lipid metabolic process
MSTRG.46972	--	0.31	0.46	0.69	0.1	0.24	0.17	0.57	0.48	0.64	0.5633	0.17	0.4867	1.517399217	0.001370404	0.006942856	0.211054877	0.326273316	0.87192714	U-box domain-containing protein 14-like isoform X2 [Brassica napus]	-	-	GO:0003824//catalytic activity	-
MSTRG.46974	--	4.74	5.24	4.44	1.63	0.86	1.4	3.19	3.37	2.53	3.03	1.2967	4.8067	1.890229104	3.42E-18	9.18E-17	-0.665718965	0.151000043	0.63798993	unnamed protein product [Brassica napus]	-	-	-	-
MSTRG.47005	CYP71B2	0.09	0.1	0.67	0.06	0	0.09	0.95	0.47	1.53	0.9833	0.05	0.2867	2.519374159	0.011421081	0.043726289	1.77830639	0.007988171	0.096983288	PREDICTED: cytochrome P450 71B2-like isoform X1 [Brassica oleracea var. oleracea] [Brassica oleracea]	-	-	-	-
MSTRG.47143	GXM3	0.5	0.35	0.19	1.61	1.64	1.29	0.14	0	0.07	0.07	1.5133	0.3467	-2.126108769	0.002597685	0.012196842	-2.308122295	0.080202106	0.459847482	BnaC02g20650D [Brassica napus]	-	GO:0016020//membrane	GO:0008168//methyltransferase activity	GO:0045491//xylan metabolic process
MSTRG.47164	RTNLB8	4.37	4.93	3.65	10.24	9.58	8.52	2.6	2.67	3.18	2.8167	9.4467	4.3167	-1.12988766	0.003514841	0.015895651	-0.615928851	0.234206336	0.777737784	reticulon-like protein B8 [Brassica rapa]	-	GO:0031090//organelle membrane;GO:0031224//intrinsic component of membrane;GO:0043231//intracellular membrane-bounded organelle	-	GO:0006605//protein targeting;GO:0009891//positive regulation of biosynthetic process;GO:0043067//regulation of programmed cell death
MSTRG.47183	--	0.31	0	0.07	3.43	13.74	13.96	0	0	0.08	0.0267	10.3767	0.1267	-6.356162348	1.64E-11	2.66E-10	-2.247927513	0.495314905	0.977046233	BnaA02g28970D [Brassica napus]	-	-	-	-
MSTRG.47211	AIL1	0.68	0.47	0.56	0.24	0.13	0.16	1.24	1.06	0.83	1.0433	0.1767	0.57	1.68993206	2.78E-05	0.000202929	0.872166332	0.001792891	0.029745673	PREDICTED: AP2-like ethylene-responsive transcription factor AIL1 [Brassica oleracea var. oleracea] [Brassica oleracea]	-	GO:0043231//intracellular membrane-bounded organelle	GO:0001071//nucleic acid binding transcription factor activity	GO:0010468//regulation of gene expression;GO:0034645//cellular macromolecule biosynthetic process;GO:0044699//single-organism process
MSTRG.47212	--	0.12	0.14	0.13	0.81	0.53	0.68	0.06	0.13	0.13	0.1067	0.6733	0.13	-2.372809264	0.011417342	0.043717984	-0.285402219	0.99417196	0.998863717	hypothetical protein HID58_023083 [Brassica napus]	-	-	-	-
MSTRG.47278	MYB54	0.31	0.03	0.2	0	0	0	0.11	0.37	0.47	0.3167	0	0.18	7.491853096	0.003125552	0.01432825	0.814968106	0.255664705	0.802122239	PREDICTED: transcription factor WER-like [Brassica oleracea var. oleracea] [Brassica oleracea]	ko04626//Plant-pathogen interaction	GO:0043231//intracellular membrane-bounded organelle	GO:0000975//regulatory region DNA binding;GO:0001071//nucleic acid binding transcription factor activity	GO:0001101//response to acid chemical;GO:0009834//plant-type secondary cell wall biogenesis;GO:0010468//regulation of gene expression
MSTRG.47305	--	2.59	2.23	1.69	0.76	0.36	0.44	2.54	1.76	1.02	1.7733	0.52	2.17	2.061111514	1.25E-17	3.23E-16	-0.291231298	0.877745988	0.980399641	Harbinger transposase-derived protein [Arabidopsis suecica]	-	-	-	-
MSTRG.47395	--	1.8	1.55	2.18	7.17	4.88	5.59	0.78	0.82	0.89	0.83	5.88	1.8433	-1.673499175	8.45E-05	0.000559288	-1.151133738	0.019445807	0.186112394	PREDICTED: uncharacterized protein LOC108832889 [Raphanus sativus]	-	-	-	-
MSTRG.47442	--	0.56	0.96	0.58	3.42	3.5	2.99	0.34	0.36	0.51	0.4033	3.3033	0.7	-2.23849573	4.39E-07	4.30E-06	-0.79538228	0.364158353	0.904712185	BnaC09g13630D [Brassica napus]	-	-	-	-
MSTRG.47507	--	0.34	0	0	2.6	1.27	1.51	0	0.1	0.15	0.0833	1.7933	0.1133	-3.983999521	0.000673108	0.003675628	-0.443606651	0.969683444	0.993578655	hypothetical protein IGI04_019141 [Brassica rapa subsp. trilocularis] [Brassica rapa]	-	-	-	-
MSTRG.47534	CNGC20	0.03	0.09	0.02	0.52	0.5	0.56	0.04	0.02	0.13	0.0633	0.5267	0.0467	-3.496425826	0.000271528	0.001621462	0.440572591	0.630569522	0.980399641	probable cyclic nucleotide-gated ion channel 20, chloroplastic [Brassica napus]	ko04626//Plant-pathogen interaction	GO:0009536//plastid;GO:0016020//membrane	GO:0030551//cyclic nucleotide binding	GO:0006605//protein targeting;GO:0006952//defense response;GO:0009617//response to bacterium;GO:0009620//response to fungus;GO:0009696//salicylic acid metabolic process;GO:0009755//hormone-mediated signaling pathway;GO:0009863//salicylic acid mediated signaling pathway;GO:0010243//response to organonitrogen compound;GO:0035556//intracellular signal transduction;GO:0042743//hydrogen peroxide metab…
MSTRG.47593	--	0.76	0.66	0.59	3.49	3.08	2.95	0.25	0.29	0.46	0.3333	3.1733	0.67	-2.243766072	1.55E-05	0.00011844	-1.007195501	0.315499535	0.862844498	Mitochondrial carrier protein [Trema orientale]	-	-	-	-
MSTRG.4760	--	17.63	28.63	29.05	65.74	57.72	54.73	15.08	28.74	23.32	22.38	59.3967	25.1033	-1.242503025	0.002608295	0.012239779	-0.165668908	0.52889781	0.980399641	AT5G03545 [Arabidopsis thaliana]	-	-	-	GO:0044238//primary metabolic process;GO:0044249//cellular biosynthetic process;GO:0044763//single-organism cellular process;GO:1901576//organic substance biosynthetic process
MSTRG.47612	--	1.58	1.49	0.54	0.73	0.51	1.8	0.26	0.09	0.04	0.13	1.0133	1.2033	0.247927513	0.119720626	0.290742137	-3.210452808	1.84E-06	7.83E-05	BnaC07g15840D [Brassica napus]	-	-	-	-
MSTRG.47667	ATL7	5.01	4.15	4.2	10.25	9.27	8.85	4.23	4.25	3.44	3.9733	9.4567	4.4533	-1.086446143	0.005198478	0.022280754	-0.164535772	0.391932894	0.921926842	RING-H2 finger protein ATL7 [Brassica rapa]	-	GO:0031224//intrinsic component of membrane	GO:0019787//ubiquitin-like protein transferase activity;GO:0046914//transition metal ion binding	GO:0032446//protein modification by small protein conjugation
MSTRG.47726	--	0.25	0.11	0.11	1.14	0.97	1.12	0.06	0.1	0.1	0.0867	1.0767	0.1567	-2.780801503	0.000345425	0.002015916	-0.854149134	0.616454223	0.980399641	protein WEAK CHLOROPLAST MOVEMENT UNDER BLUE LIGHT-like 2 [Brassica rapa]	ko01100//Metabolic pathways;ko01110//Biosynthesis of secondary metabolites;ko00010//Glycolysis / Gluconeogenesis;ko00620//Pyruvate metabolism;ko00561//Glycerolipid metabolism;ko00380//Tryptophan metabolism;ko00330//Arginine and proline metabolism;ko00053//Ascorbate and aldarate metabolism;ko00071//Fatty acid degradation;ko00280//Valine, leucine and isoleucine degradation;ko00410//beta-Alanine met…	-	-	-
MSTRG.47732	GH3.10	0.73	0.57	0.68	2.96	6.65	4.2	0.4	0.43	0.25	0.36	4.6033	0.66	-2.802140984	7.11E-10	9.86E-09	-0.874469118	0.23773601	0.78185277	indole-3-acetic acid-amido synthetase GH3.10-like [Brassica napus]	ko04075//Plant hormone signal transduction	-	-	GO:0001101//response to acid chemical;GO:0006952//defense response;GO:0006970//response to osmotic stress
MSTRG.47790	--	0.72	0.76	0.73	2.1	1.63	2.41	0.74	0.67	0.59	0.6667	2.0467	0.7367	-1.474192286	0.004085203	0.018114226	-0.14404637	0.606084034	0.980399641	hypothetical protein F2Q69_00022664 [Brassica cretica]	-	-	-	-
MSTRG.47794	--	0.15	0.1	0.14	0.35	0.34	0.38	0	0	0	0	0.3567	0.13	-1.456064768	0.123844032	0.298087008	-7.022367813	0.000894852	0.016897966	BnaC07g15840D [Brassica napus]	-	-	-	-
MSTRG.47826	--	1.25	1.09	0.82	3.95	3.94	3.04	0.85	0.61	0.23	0.5633	3.6433	1.0533	-1.790296937	0.003893234	0.017369292	-0.902901312	0.435970732	0.948182414	BnaC09g43340D [Brassica napus]	-	-	-	-
MSTRG.47827	--	0.75	2.01	1.09	5.61	6.49	5.14	0	0.51	0.89	0.4667	5.7467	1.2833	-2.162829424	4.53E-05	0.000316766	-1.459431619	0.171347243	0.677184845	BnaC09g43340D [Brassica napus]	-	-	-	-
MSTRG.47833	--	0.25	0.37	0.22	2.2	1.96	1.59	0.08	0.3	0.17	0.1833	1.9167	0.28	-2.775100723	0.002212827	0.010614122	-0.610957709	0.760839283	0.980399641	hypothetical protein F2Q69_00012909 [Brassica cretica]	-	-	-	-
MSTRG.47872	RPS6	0.62	0.69	0.75	0.01	0.04	0.03	0.59	1.07	0.52	0.7267	0.0267	0.6867	4.686500527	1.42E-18	3.89E-17	0.081683798	0.240726753	0.785094648	disease resistance protein RPS6 isoform X3 [Brassica rapa]	-	GO:0005911//cell-cell junction;GO:0044424//intracellular part	-	GO:0006950//response to stress;GO:0009617//response to bacterium
MSTRG.47886	--	5.88	5.84	5.17	11.57	14.44	13.15	5.12	4.2	3.47	4.2633	13.0533	5.63	-1.213211437	0.004156384	0.018374261	-0.401153064	0.824830244	0.980399641	BnaC08g09670D [Brassica napus]	-	-	-	-
MSTRG.47939	PGPS2	3.08	2.48	2.06	5.72	5.86	6.71	1.41	1.01	1.13	1.1833	6.0967	2.54	-1.263192172	0.006429583	0.026781007	-1.101971973	0.026167417	0.227931443	BnaC09g52780D [Brassica napus]	-	GO:0031224//intrinsic component of membrane;GO:0042170//plastid membrane	GO:0017169//CDP-alcohol phosphatidyltransferase activity;GO:0046914//transition metal ion binding	GO:0006089//lactate metabolic process;GO:0046471//phosphatidylglycerol metabolic process;GO:0046474//glycerophospholipid biosynthetic process
MSTRG.48019	--	64.27	55.34	61.23	28.65	24.38	28.46	90.13	68.83	99.67	86.21	27.1633	60.28	1.150018887	1.07E-54	1.19E-52	0.516175809	2.58E-09	2.03E-07	hypothetical protein F2Q68_00001654 [Brassica cretica]	-	-	-	-
MSTRG.48081	NPF5.2	7.49	6.75	7.71	1.45	1.43	0.75	5.46	5.7	6.55	5.9033	1.21	7.3167	2.596179486	2.98E-32	1.64E-30	-0.309656728	0.901680841	0.980399641	Transposon En/Spm-like [Arabidopsis thaliana x Arabidopsis arenosa]	-	-	-	-
MSTRG.48090	--	2.6	2.93	3.29	6.04	6.56	7.24	0.55	0.41	0.51	0.49	6.6133	2.94	-1.169561465	0.000347829	0.002028954	-2.584962501	4.18E-25	2.44E-22	GAG-pre-integrase domain, partial [Arabidopsis suecica]	-	-	-	-
MSTRG.48180	--	12.02	13.69	10.86	46.38	50.86	40.85	3.6	5.46	3.81	4.29	46.03	12.19	-1.916876317	1.38E-18	3.81E-17	-1.506648573	2.65E-07	1.39E-05	BnaC09g43340D [Brassica napus]	-	-	-	-
MSTRG.48219	--	2.23	2.76	4.02	0.91	0.86	0.67	4.9	5.12	8.38	6.1333	0.8133	3.0033	1.884645958	4.82E-12	8.21E-11	1.030106755	9.51E-06	0.000343204	DEK C-terminal [Arabidopsis suecica]	-	GO:0044424//intracellular part	-	GO:0009409//response to cold
MSTRG.4822	--	0.34	0.3	0.06	6.26	5.12	5.66	0	0	0	0	5.68	0.2333	-4.605426603	2.41E-15	5.35E-14	-7.866248611	0.058549939	0.381659932	BnaA04g27020D [Brassica napus]	-	-	-	-
MSTRG.48269	At4g18490	1.39	1.31	1.38	0.32	0.56	0.5	2.2	2.13	2.5	2.2767	0.46	1.36	1.563900885	4.93E-11	7.66E-10	0.743316426	5.83E-06	0.0002193	PREDICTED: GTP-binding protein OBGC, chloroplastic isoform X1 [Fragaria vesca subsp. vesca] [Fragaria vesca]	-	-	-	-
MSTRG.48292	At4g11580	1.31	2.44	1.56	0.1	0	0.35	0.99	1.18	1.05	1.0733	0.15	1.77	3.560714954	2.80E-08	3.22E-07	-0.721651173	0.325624503	0.871719842	BnaCnng08450D [Brassica napus]	-	-	-	-
MSTRG.48320	--	1.36	0.06	1.19	0.17	0.05	0.09	1	0.07	0.69	0.5867	0.1033	0.87	3.073709686	0.001339338	0.006799646	-0.568474378	0.827324159	0.980399641	transmembrane protein [Arabidopsis thaliana]	-	GO:0043231//intracellular membrane-bounded organelle	-	-
MSTRG.48322	--	0.77	1.11	0.84	1.79	1.21	1.56	0.05	0.26	0.05	0.12	1.52	0.9067	-0.745427173	0.796331539	0.935169044	-2.91753784	0.002285463	0.036209535	hypothetical protein HID58_057080 [Brassica napus]	-	-	-	-
MSTRG.48415	--	0.08	0.14	0.12	0.62	0.64	0.39	0.16	0.21	0.13	0.1667	0.55	0.1133	-2.278859373	0.009995085	0.038994086	0.556393349	0.307314511	0.855116771	meiosis-specific protein ASY2-like [Brassica napus]	-	-	-	-
MSTRG.48459	--	3.79	3.83	3.84	1.32	1.04	1.45	3.15	3.54	2.44	3.0433	1.27	3.82	1.588744141	1.04E-18	2.88E-17	-0.327920279	0.961670417	0.992318988	BnaC06g41530D [Brassica napus]	ko03420//Nucleotide excision repair;ko03440//Homologous recombination;ko03030//DNA replication;ko03430//Mismatch repair	-	-	-
MSTRG.48502	--	1.84	1.57	1.17	6.87	7.63	7.58	1.27	0.42	1.14	0.9433	7.36	1.5267	-2.269320669	1.43E-07	1.51E-06	-0.694545545	0.57365361	0.980399641	hypothetical protein F2Q69_00012909 [Brassica cretica]	-	-	-	-
MSTRG.48585	--	1.32	0.84	0.84	3.62	3.36	2.67	0.16	0.49	0.46	0.37	3.2167	1	-1.685566442	0.002033353	0.009860825	-1.434402824	0.025195575	0.221872487	ORF-c [Brassica rapa]	-	-	-	-
MSTRG.48592	CLPR2	45.78	47.95	44.37	23.69	20.31	21.27	35.8	33.75	33.8	34.45	21.7567	46.0333	1.081221375	6.47E-75	1.11E-72	-0.418174931	0.304339296	0.852700828	ATP-dependent Clp protease proteolytic subunit-related protein 2, chloroplastic [Eutrema salsugineum]	-	GO:0009368//endopeptidase Clp complex;GO:0009526//plastid envelope;GO:0009532//plastid stroma;GO:0031976//plastid thylakoid;GO:0044434//chloroplast part	GO:0016787//hydrolase activity	GO:0006355//regulation of transcription, DNA-templated;GO:0009658//chloroplast organization;GO:0009668//plastid membrane organization;GO:0016072//rRNA metabolic process;GO:0031399//regulation of protein modification process;GO:0043623//cellular protein complex assembly
MSTRG.48616	PIF6	22.82	24.11	20.55	6.94	5.62	6.24	22.98	27.43	25.45	25.2867	6.2667	22.4933	1.843727312	6.67E-86	1.41E-83	0.168879398	1.68E-06	7.20E-05	transcription factor PIF6 isoform X3 [Brassica rapa]	-	GO:0043231//intracellular membrane-bounded organelle	GO:0001071//nucleic acid binding transcription factor activity;GO:0005515//protein binding	GO:0007165//signal transduction;GO:0009628//response to abiotic stimulus;GO:0010087//phloem or xylem histogenesis;GO:0010467//gene expression;GO:0019222//regulation of metabolic process;GO:0034645//cellular macromolecule biosynthetic process
MSTRG.48731	ddx11	1.13	0.82	1.33	0.02	0.01	0	1.89	1.89	2.69	2.1567	0.01	1.0933	6.772589504	8.64E-17	2.13E-15	0.980069897	4.68E-07	2.32E-05	PREDICTED: probable ATP-dependent RNA helicase DDX11 [Brassica oleracea var. oleracea] [Brassica oleracea]	-	GO:0043231//intracellular membrane-bounded organelle	GO:0003678//DNA helicase activity;GO:0032550//purine ribonucleoside binding	GO:0000723//telomere maintenance;GO:0006260//DNA replication;GO:0010212//response to ionizing radiation;GO:0032844//regulation of homeostatic process;GO:0033043//regulation of organelle organization;GO:0070192//chromosome organization involved in meiotic cell cycle
MSTRG.48828	--	0.55	0.9	0.32	13.91	48.46	18.37	0.17	0.39	0.09	0.2167	26.9133	0.59	-5.511462321	1.10E-18	3.03E-17	-1.445237737	0.321318371	0.86777541	BnaA05g14090D [Brassica napus]	-	-	-	-
MSTRG.48830	IQM2	1.43	0.91	0.4	0	0	0	1.22	0.31	0.12	0.55	0	0.9133	9.834997677	4.90E-11	7.62E-10	-0.731709869	0.610931482	0.980399641	IQ domain-containing protein IQM2-like [Brassica napus]	-	-	-	-
MSTRG.4884	OlnB1	3.98	4.42	4.97	0.65	0.59	0.35	3.53	1.74	2.16	2.4767	0.53	4.4567	3.071900795	7.31E-21	2.32E-19	-0.84756535	0.149268712	0.634599262	oleosin-B1 [Brassica rapa]	-	GO:0005811//lipid particle;GO:0031224//intrinsic component of membrane;GO:0043231//intracellular membrane-bounded organelle;GO:0044420//extracellular matrix component	GO:0005488//binding	GO:0000003//reproduction;GO:0000904//cell morphogenesis involved in differentiation;GO:0006833//water transport;GO:0008037//cell recognition;GO:0009664//plant-type cell wall organization;GO:0022414//reproductive process;GO:0051235//maintenance of location
MSTRG.48866	--	2.29	2.61	2.79	11.28	10.94	12.68	2.39	2.82	2.57	2.5933	11.6333	2.5633	-2.182171533	3.75E-22	1.27E-20	0.016786557	0.094455748	0.504082539	tetratricopeptide repeat protein 38-like isoform X1 [Brassica napus]	-	-	-	-
MSTRG.48949	CHR17	0.05	0.02	0.04	0.3	0.4	0.42	0.02	0.03	0	0.0167	0.3733	0.0367	-3.347923303	0.000205583	0.001262126	-1.137503524	0.564494534	0.980399641	ISWI chromatin-remodeling complex ATPase CHR17-like [Brassica napus]	-	GO:0031010//ISWI-type complex;GO:0044444//cytoplasmic part	GO:0003676//nucleic acid binding;GO:0003682//chromatin binding;GO:0032550//purine ribonucleoside binding;GO:0042623//ATPase activity, coupled	GO:0000280//nuclear division;GO:0003006//developmental process involved in reproduction;GO:0006260//DNA replication;GO:0006305//DNA alkylation;GO:0006338//chromatin remodeling;GO:0006342//chromatin silencing;GO:0007017//microtubule-based process;GO:0009606//tropism;GO:0033043//regulation of organelle organization;GO:0034968//histone lysine methylation;GO:0035194//posttranscriptional gene silencin…
MSTRG.48951	--	5.39	4.54	5.4	13.15	37.65	18.61	3.51	3.74	3.94	3.73	23.1367	5.11	-2.178785832	1.55E-05	0.000117886	-0.454147661	0.648594537	0.980399641	unnamed protein product [Brassica napus]	-	-	-	-
MSTRG.48989	--	0.51	0.35	0.53	0.05	0.03	0.17	1.08	1.23	1.32	1.21	0.0833	0.4633	2.475084883	1.91E-05	0.000143589	1.384884665	9.49E-07	4.38E-05	BnaC03g65670D [Brassica napus]	-	-	GO:0046914//transition metal ion binding;GO:0097159//organic cyclic compound binding	-
MSTRG.49003	At4g15970	0.11	0.1	0.06	2.65	2.69	2.47	0	0.12	0	0.04	2.6033	0.09	-4.854291236	3.18E-12	5.52E-11	-1.169925001	0.779886153	0.980399641	Nucleotide-diphospho-sugar transferase [Arabidopsis thaliana x Arabidopsis arenosa]	-	GO:0044424//intracellular part	-	-
MSTRG.49022	--	0.32	0.27	0.17	0.51	1.07	2.16	0	0.11	0	0.0367	1.2467	0.2533	-2.298966946	0.00146824	0.007385222	-2.788495895	0.023967364	0.214263545	Retrotransposon gag domain [Arabidopsis suecica]	-	-	-	-
MSTRG.49029	--	0.34	0.32	0.16	0.53	0.89	2.19	0.08	0.14	0	0.0733	1.2033	0.2733	-2.138303022	0.006346777	0.026484954	-1.898120386	0.069921365	0.424062414	BnaA07g03900D [Brassica napus]	-	-	-	-
MSTRG.49031	--	1.73	1.36	1.38	0.1	0.13	0	1.66	1.38	1.21	1.4167	0.0767	1.49	4.280569065	9.70E-07	9.05E-06	-0.07281199	0.601453277	0.980399641	-	-	-	-	-
MSTRG.49053	--	0.61	0.54	0.58	0.29	0.12	0.21	0.75	0.46	0.57	0.5933	0.2067	0.5767	1.480431917	0.000927481	0.004902224	0.041105203	0.495343155	0.977046233	BnaC02g36480D [Brassica napus]	-	-	-	-
MSTRG.49132	MYB118	4.33	3.56	3.85	10.71	10.83	12.06	1.99	1.8	1.76	1.85	11.2	3.9133	-1.517028825	1.72E-05	0.000130409	-1.080872732	0.018901909	0.182118462	transcription factor MYB118-like isoform X1 [Brassica napus]	ko04626//Plant-pathogen interaction	-	-	-
MSTRG.49166	--	1.41	3.06	0.59	1.27	1.06	0.51	0	0	0	0	0.9467	1.6867	0.833246455	0.016543219	0.059767779	-10.71995917	3.03E-08	1.93E-06	hypothetical protein F2Q69_00024598 [Brassica cretica]	-	-	-	-
MSTRG.49221	TT10	175.15	238.02	191.67	624.7	393.08	544.05	99.42	108.38	73.48	93.76	520.61	201.6133	-1.368611972	1.37E-05	0.000105738	-1.104546577	8.29E-08	4.80E-06	PREDICTED: laccase-15 [Brassica oleracea var. oleracea] [Brassica oleracea]	-	GO:0005576//extracellular region	GO:0016491//oxidoreductase activity	GO:0009699//phenylpropanoid biosynthetic process;GO:0009808//lignin metabolic process
MSTRG.49222	TT10	5.65	5.15	2.83	11.47	7.49	10.58	1.77	2.27	1.57	1.87	9.8467	4.5433	-1.115884264	0.425024226	0.693281506	-1.280712886	0.00091855	0.017230332	PREDICTED: laccase-15 [Brassica oleracea var. oleracea] [Brassica oleracea]	-	-	-	GO:0009698//phenylpropanoid metabolic process
MSTRG.49245	--	0.36	0.51	0.09	3.14	2.09	2.13	0.3	0.39	0.16	0.2833	2.4533	0.32	-2.938599455	9.59E-05	0.000628464	-0.175571565	0.877331467	0.980399641	unnamed protein product [Brassica napus]	-	-	-	-
MSTRG.49268	AAT1	0.48	0.62	0.5	2.06	2.28	1.48	0.34	0.24	0.27	0.2833	1.94	0.5333	-1.862947248	0.008127466	0.032741483	-0.912537159	0.38882482	0.919824059	acetyl-CoA acetyltransferase, cytosolic 1-like isoform X1 [Brassica rapa]	ko01100//Metabolic pathways;ko01110//Biosynthesis of secondary metabolites;ko01200//Carbon metabolism;ko00620//Pyruvate metabolism;ko00630//Glyoxylate and dicarboxylate metabolism;ko01212//Fatty acid metabolism;ko00380//Tryptophan metabolism;ko00900//Terpenoid backbone biosynthesis;ko00071//Fatty acid degradation;ko00280//Valine, leucine and isoleucine degradation;ko00310//Lysine degradation;ko00…	GO:0016020//membrane;GO:0042579//microbody	GO:0003988//acetyl-CoA C-acyltransferase activity;GO:0043169//cation binding	GO:0000904//cell morphogenesis involved in differentiation;GO:0003006//developmental process involved in reproduction;GO:0006084//acetyl-CoA metabolic process;GO:0016104//triterpenoid biosynthetic process;GO:0016129//phytosteroid biosynthetic process;GO:0044707//single-multicellular organism process
MSTRG.49288	--	0	0	0	0.45	2.67	3.3	0	0	0	0	2.14	0	-11.06339508	3.34E-05	0.000239817	0	1	1	BnaAnng06900D [Brassica napus]	-	-	-	-
MSTRG.49361	--	0.3	0.13	0.13	0	0.02	0.07	0.31	0.09	0	0.1333	0.03	0.1867	2.637429921	0.011037473	0.042456082	-0.485426827	0.92928151	0.984774467	BnaCnng73940D [Brassica napus]	-	-	-	-
MSTRG.4939	VQ31	0.97	1.76	1.21	0.08	0.14	0.07	0.31	1.18	0.56	0.6833	0.0967	1.3133	3.764070824	1.11E-09	1.50E-08	-0.94257172	0.277080779	0.826624062	BnaAnng06050D [Brassica napus]	-	-	-	-
MSTRG.49450	--	11.48	9.61	7.19	22.29	21.29	23.39	8.35	8.81	8.69	8.6167	22.3233	9.4267	-1.243732848	0.002301757	0.010991465	-0.12961784	0.387872464	0.919509566	unnamed protein product [Brassica napus]	-	-	-	-
MSTRG.49507	--	0.21	0.56	0.36	3.89	3.97	2.61	0.33	0.44	0	0.2567	3.49	0.3767	-3.211866765	4.17E-06	3.52E-05	-0.553392422	0.848197994	0.980399641	hypothetical protein F2Q69_00012909 [Brassica cretica]	-	-	-	-
MSTRG.49560	RD22	0	0	0	0.14	1.01	0.02	0	0	0	0	0.39	0	-8.607330314	0.003796689	0.017005511	0	1	1	PREDICTED: dehydration-responsive protein RD22-like [Brassica oleracea var. oleracea] [Brassica oleracea]	-	GO:0031984//organelle subcompartment;GO:0043231//intracellular membrane-bounded organelle	-	GO:0006970//response to osmotic stress;GO:0009414//response to water deprivation
MSTRG.49661	--	1.83	2.06	3.06	0.45	0.16	0.52	2.81	3.08	3.92	3.27	0.3767	2.3167	2.620690205	3.16E-08	3.62E-07	0.497240159	0.031817467	0.260364218	Vacuolar protein sorting-associated protein like [Actinidia chinensis var. chinensis] [Actinidia chinensis]	-	GO:0009536//plastid	-	-
MSTRG.49696	--	16.04	17.27	16.16	35.81	30.52	33.6	5.73	8.59	5.08	6.4667	33.31	16.49	-1.014363955	0.000518438	0.002906839	-1.350497247	3.11E-08	1.97E-06	Harbinger transposase-derived protein [Arabidopsis suecica]	-	-	-	-
MSTRG.49731	--	0.1	0.15	0.13	0.61	0.81	0.62	0.03	0.1	0.16	0.0967	0.68	0.1267	-2.424497829	0.010691258	0.041324131	-0.389946518	0.897341376	0.980399641	BnaC07g04080D [Brassica napus]	-	-	-	-
MSTRG.4974	PME51	0.03	0	0	0.63	0.62	0.86	0	0	0	0	0.7033	0.01	-6.136136688	7.30E-05	0.000490939	-3.321928095	0.903039578	0.980399641	probable pectinesterase/pectinesterase inhibitor 51 [Brassica rapa]	-	GO:0005618//cell wall;GO:0009536//plastid	GO:0052689//carboxylic ester hydrolase activity	GO:0000272//polysaccharide catabolic process;GO:0009892//negative regulation of metabolic process;GO:0048509//regulation of meristem development;GO:0071555//cell wall organization
MSTRG.49763	--	0	0	0	0.17	0.48	3.14	0	0	0	0	1.2633	0	-10.30301963	0.001547034	0.007727552	0	1	1	defensin-like protein 87 [Arabidopsis lyrata subsp. lyrata] [Arabidopsis lyrata]	-	-	-	-
MSTRG.49797	--	0.05	0.09	0.68	0	0	0	1.14	0.5	1.54	1.06	0	0.2733	8.094517599	0.00374939	0.016818002	1.955330951	0.010362039	0.116932057	late embryogenesis abundant protein [Arabis alpina]	-	GO:0009536//plastid	-	-
MSTRG.49849	--	0.77	0.42	0.3	0.04	0.16	0.09	0.89	1.05	1.03	0.99	0.0967	0.4967	2.361187525	0.001161197	0.005987526	0.9951506	0.01370369	0.143935129	PREDICTED: polyadenylate-binding protein 2-like [Raphanus sativus]	-	-	-	-
MSTRG.49916	MVP1	57.33	64.9	52.96	155.15	179.42	150.75	29.61	33.78	28.24	30.5433	161.7733	58.3967	-1.470015888	1.41E-16	3.44E-15	-0.935028503	1.25E-09	1.06E-07	PREDICTED: inactive GDSL esterase/lipase-like protein 25 [Brassica oleracea var. oleracea] [Brassica oleracea]	-	GO:0005576//extracellular region;GO:0005774//vacuolar membrane;GO:0005840//ribosome;GO:0005911//cell-cell junction;GO:0009526//plastid envelope;GO:0042579//microbody	GO:0016788//hydrolase activity, acting on ester bonds	GO:0006796//phosphate-containing compound metabolic process;GO:0006886//intracellular protein transport;GO:0006950//response to stress;GO:0006996//organelle organization;GO:0009617//response to bacterium;GO:0019637//organophosphate metabolic process;GO:0019759//glycosinolate catabolic process;GO:0044238//primary metabolic process;GO:0044249//cellular biosynthetic process;GO:0044711//single-organi…
MSTRG.49919	--	1.7	1.92	1.6	18.23	16.91	15.99	1.43	1.35	1.55	1.4433	17.0433	1.74	-3.292048314	4.92E-58	5.86E-56	-0.269682782	0.809148958	0.980399641	BnaCnng70510D [Brassica napus]	-	-	-	-
MSTRG.49925	GLIP3	1.73	0.15	0.71	0.56	0.61	0.66	0	0	0.12	0.04	0.61	0.8633	0.501108449	0.138398123	0.32367153	-4.431845787	0.000708533	0.013941936	PREDICTED: GDSL esterase/lipase 3-like [Brassica oleracea var. oleracea] [Brassica oleracea]	-	GO:0044421//extracellular region part;GO:0044464//cell part	GO:0052689//carboxylic ester hydrolase activity	GO:0001101//response to acid chemical;GO:0002218//activation of innate immune response;GO:0006629//lipid metabolic process;GO:0009617//response to bacterium;GO:0009814//defense response, incompatible interaction;GO:0009873//ethylene-activated signaling pathway;GO:0050832//defense response to fungus
MSTRG.49940	ASP4	1.06	0.49	0.73	2.84	2.18	3.12	0.42	0.71	0.82	0.65	2.7133	0.76	-1.83599497	0.000874384	0.00464686	-0.2255597	0.76523561	0.980399641	PREDICTED: aspartate aminotransferase, cytoplasmic isozyme 2-like [Brassica oleracea var. oleracea] [Brassica oleracea]	ko01100//Metabolic pathways;ko01110//Biosynthesis of secondary metabolites;ko01200//Carbon metabolism;ko01230//Biosynthesis of amino acids;ko00270//Cysteine and methionine metabolism;ko01210//2-Oxocarboxylic acid metabolism;ko00710//Carbon fixation in photosynthetic organisms;ko00330//Arginine and proline metabolism;ko00250//Alanine, aspartate and glutamate metabolism;ko00400//Phenylalanine, tyro…	GO:0005911//cell-cell junction;GO:0009536//plastid;GO:0030312//external encapsulating structure;GO:0031090//organelle membrane;GO:0042579//microbody	GO:0043168//anion binding;GO:0046914//transition metal ion binding;GO:0070546//L-phenylalanine aminotransferase activity	GO:0006511//ubiquitin-dependent protein catabolic process;GO:0009062//fatty acid catabolic process;GO:0009404//toxin metabolic process;GO:0009692//ethylene metabolic process;GO:0009725//response to hormone;GO:0010260//organ senescence;GO:0035966//response to topologically incorrect protein;GO:0043248//proteasome assembly;GO:0048588//developmental cell growth
MSTRG.49978	ECP63	3.15	3.69	3.54	0.93	0.49	0.95	4.78	3.57	4.2	4.1833	0.79	3.46	2.130847479	7.50E-18	1.97E-16	0.27388092	0.007029033	0.087665689	PREDICTED: LOW QUALITY PROTEIN: embryonic protein DC-8 [Brassica oleracea var. oleracea] [Brassica oleracea]	-	GO:0044444//cytoplasmic part	-	GO:0003006//developmental process involved in reproduction
MSTRG.50047	--	2.3	3.24	2.83	8.62	9.88	9.35	0.88	1.35	1.45	1.2267	9.2833	2.79	-1.7343778	1.70E-11	2.74E-10	-1.185521856	0.000780534	0.015129198	Harbinger transposase-derived protein [Arabidopsis thaliana x Arabidopsis arenosa]	-	-	-	-
MSTRG.50134	At5g04045	0	0	0	0.47	1.65	0.99	0	0	0	0	1.0367	0	-10.01773636	0.001432684	0.007225084	0	1	1	PREDICTED: defensin-like protein 301 [Brassica oleracea var. oleracea] [Brassica oleracea]	-	-	-	-
MSTRG.50160	--	0.98	1.38	0.78	12.86	12.35	10.13	1.01	1.48	0.41	0.9667	11.78	1.0467	-3.492465576	5.62E-27	2.47E-25	-0.114711659	0.692066789	0.980399641	BnaC09g11400D [Brassica napus]	-	-	-	-
MSTRG.50206	TY3B-G	1.2	1.56	1.84	3.94	4.15	3.84	0.94	1.05	0.94	0.9767	3.9767	1.5333	-1.374888277	0.000223814	0.001362634	-0.650733197	0.175336921	0.684661314	Pentatricopeptide repeat [Arabidopsis thaliana x Arabidopsis arenosa]	-	-	-	-
MSTRG.50304	PCMP-H57	3.77	4.42	5.87	0.28	0	0.33	13.49	8.03	10.56	10.6933	0.2033	4.6867	4.526643542	3.09E-10	4.43E-09	1.190077547	2.35E-05	0.000750988	LOW QUALITY PROTEIN: pentatricopeptide repeat-containing protein At3g14330 [Arabidopsis lyrata subsp. lyrata] [Arabidopsis lyrata]	-	-	-	GO:0009451//RNA modification
MSTRG.50370	At3g22650	0	0	0	0.26	0.51	0.37	0	0	0	0	0.38	0	-8.569855608	0.000333288	0.00195272	0	1	1	PREDICTED: F-box protein At3g08750-like [Raphanus sativus]	-	GO:0042995//cell projection	-	GO:0009653//anatomical structure morphogenesis;GO:0009725//response to hormone;GO:0009791//post-embryonic development;GO:0009987//cellular process;GO:0016043//cellular component organization
MSTRG.50485	--	6.19	7.05	5.11	16.6	15.22	13.74	2.69	3.73	2.4	2.94	15.1867	6.1167	-1.311987684	2.39E-16	5.70E-15	-1.056929502	0.000651768	0.013002812	Harbinger transposase-derived protein [Arabidopsis suecica]	-	-	-	-
MSTRG.50497	OlnB1	0.66	2.16	1.54	9.04	9.69	12.15	0.08	0.19	0.13	0.1333	10.2933	1.4533	-2.824272712	1.01E-09	1.37E-08	-3.44625623	4.30E-05	0.001270933	oleosin-B1 isoform X2 [Brassica rapa]	-	GO:0005811//lipid particle;GO:0031224//intrinsic component of membrane;GO:0043231//intracellular membrane-bounded organelle	GO:0005488//binding	GO:0000003//reproduction;GO:0000904//cell morphogenesis involved in differentiation;GO:0009664//plant-type cell wall organization;GO:0051235//maintenance of location
MSTRG.50557	At5g08680	10.97	9.47	9.27	25.25	23.21	23.87	7.72	5.71	8	7.1433	24.11	9.9033	-1.283645546	3.93E-08	4.45E-07	-0.471316755	0.374141933	0.910855509	PREDICTED: ATP synthase subunit beta-3, mitochondrial-like [Brassica oleracea var. oleracea] [Brassica oleracea]	ko01100//Metabolic pathways;ko00190//Oxidative phosphorylation	GO:0009526//plastid envelope;GO:0019866//organelle inner membrane;GO:0033178//proton-transporting two-sector ATPase complex, catalytic domain;GO:0043232//intracellular non-membrane-bounded organelle;GO:0044455//mitochondrial membrane part	GO:0008187//poly-pyrimidine tract binding;GO:0019829//cation-transporting ATPase activity;GO:0032550//purine ribonucleoside binding;GO:0046914//transition metal ion binding	GO:0006754//ATP biosynthetic process;GO:0010038//response to metal ion;GO:0015988//energy coupled proton transmembrane transport, against electrochemical gradient
MSTRG.50572	HSP70-10	0.83	1.31	1.16	3.2	3.04	3.18	0.26	0.64	1.16	0.6867	3.14	1.1	-1.513261035	0.010337272	0.040126693	-0.679821687	0.556767828	0.980399641	heat shock 70 kDa protein 10, mitochondrial [Arabidopsis lyrata subsp. lyrata] [Arabidopsis lyrata]	ko03018//RNA degradation	GO:0009536//plastid;GO:0030312//external encapsulating structure;GO:0031090//organelle membrane;GO:0044429//mitochondrial part	GO:0005515//protein binding;GO:0016628//oxidoreductase activity, acting on the CH-CH group of donors, NAD or NADP as acceptor;GO:0032550//purine ribonucleoside binding	GO:0000302//response to reactive oxygen species;GO:0006089//lactate metabolic process;GO:0006970//response to osmotic stress;GO:0009642//response to light intensity;GO:0010038//response to metal ion;GO:0033554//cellular response to stress;GO:0044267//cellular protein metabolic process;GO:0051707//response to other organism
MSTRG.50636	RE1	0.97	0.49	0.66	0.16	0.12	0.15	0.75	1.03	0.76	0.8467	0.1433	0.7067	2.3016557	1.71E-11	2.75E-10	0.260764232	0.074653163	0.44060179	01P13-1 [Brassica rapa subsp. pekinensis] [Brassica rapa]	-	-	-	-
MSTRG.50637	--	3.04	2.29	2.24	0.99	1.16	0.65	3.94	2.36	3.51	3.27	0.9333	2.5233	1.434866473	1.56E-06	1.41E-05	0.373959836	0.065620158	0.407855316	hypothetical protein N665_0714s0014 [Sinapis alba]	-	-	-	-
MSTRG.50638	--	0.6	0.84	1.65	0.06	0.41	0.34	0.57	0.52	1.01	0.7	0.27	1.03	1.931613025	0.002067909	0.010006734	-0.55721751	0.724231001	0.980399641	-	-	-	-	-
MSTRG.50681	--	0.26	0.4	0.31	0.03	0	0.02	0.7	0.82	1.09	0.87	0.0167	0.3233	4.277984747	0.000171362	0.001071564	1.427993154	0.000664302	0.013206258	Core-2/I-branching beta-1,6-N-acetylglucosaminyltransferase family protein [Arabidopsis thaliana]	-	GO:0031984//organelle subcompartment;GO:0043231//intracellular membrane-bounded organelle	GO:0008194//UDP-glycosyltransferase activity	-
MSTRG.50748	GH3.15	2.77	3.08	2.44	6.8	8.89	8.9	1.19	1.45	1.3	1.3133	8.1967	2.7633	-1.568627728	3.76E-09	4.80E-08	-1.073176472	7.68E-05	0.002118646	PREDICTED: indole-3-acetic acid-amido synthetase GH3.17-like [Brassica oleracea var. oleracea] [Brassica oleracea]	ko04075//Plant hormone signal transduction	GO:0043231//intracellular membrane-bounded organelle	GO:0016881//acid-amino acid ligase activity	GO:0009725//response to hormone;GO:0016129//phytosteroid biosynthetic process;GO:0048878//chemical homeostasis
MSTRG.5079	LCR62	88.83	84.23	89.63	164.02	289.42	197.39	53.58	82.88	54.25	63.57	216.9433	87.5633	-1.308919472	0.00029876	0.001766905	-0.461980787	0.385405627	0.919071128	low-molecular-weight cysteine-rich 61 [Arabidopsis thaliana]	-	-	-	-
MSTRG.50835	SIRP1	0.8	0.68	0.27	3.78	2.87	3.73	0.4	0.33	0.23	0.32	3.46	0.5833	-2.568379617	2.44E-06	2.14E-05	-0.866248611	0.453779402	0.960495512	E3 ubiquitin-protein ligase SIRP1 [Brassica napus]	-	-	-	-
MSTRG.50979	At5g16150	6.72	7.16	6.34	24.08	28.01	21.35	3.04	4.91	2.97	3.64	24.48	6.74	-1.860783062	1.78E-16	4.28E-15	-0.888810141	0.012336043	0.133304069	PREDICTED: plastidic glucose transporter 4 [Brassica oleracea var. oleracea] [Brassica oleracea]	-	GO:0009528//plastid inner membrane;GO:0031224//intrinsic component of membrane	GO:0016491//oxidoreductase activity;GO:0022891//substrate-specific transmembrane transporter activity	GO:0006812//cation transport;GO:0044763//single-organism cellular process
MSTRG.50980	At5g16150	5.5	5.78	4.41	16.87	23.37	17.6	2.64	2.36	1.78	2.26	19.28	5.23	-1.8822222	4.90E-09	6.20E-08	-1.210488174	0.004628977	0.063929812	PREDICTED: plastidic glucose transporter 4 [Brassica oleracea var. oleracea] [Brassica oleracea]	-	GO:0009528//plastid inner membrane;GO:0031224//intrinsic component of membrane	GO:0022891//substrate-specific transmembrane transporter activity	GO:0006812//cation transport;GO:0044763//single-organism cellular process
MSTRG.51012	--	8.35	6.28	8.88	35.38	32.11	32.5	3.84	4.04	3.82	3.9	33.33	7.8367	-2.088509279	2.45E-14	5.04E-13	-1.006766009	0.018260841	0.177541693	unnamed protein product [Brassica napus]	-	-	-	-
MSTRG.5123	GH3.15	2.46	2.25	1.65	2.29	2.6	3.58	0.27	0.91	0.46	0.5467	2.8233	2.12	-0.413335204	0.415035793	0.684794097	-1.955330951	3.35E-05	0.001020775	indole-3-acetic acid-amido synthetase GH3.17-like [Brassica napus]	ko04075//Plant hormone signal transduction	GO:0043231//intracellular membrane-bounded organelle	GO:0016881//acid-amino acid ligase activity	GO:0009725//response to hormone;GO:0016129//phytosteroid biosynthetic process;GO:0048878//chemical homeostasis
MSTRG.51433	ACT12	0	0	0	1.25	1.03	0.73	0	0	0	0	1.0033	0	-9.970585271	6.93E-07	6.59E-06	0	1	1	PREDICTED: actin-12-like [Brassica oleracea var. oleracea] [Brassica oleracea]	-	GO:0005911//cell-cell junction;GO:0009526//plastid envelope;GO:0009532//plastid stroma;GO:0016020//membrane;GO:0043232//intracellular non-membrane-bounded organelle	GO:0005198//structural molecule activity;GO:0032550//purine ribonucleoside binding	GO:0006006//glucose metabolic process;GO:0007010//cytoskeleton organization;GO:0051603//proteolysis involved in cellular protein catabolic process
MSTRG.51537	--	0.08	0.1	0.03	1.08	1.64	1.79	0.04	0	0	0.0133	1.5033	0.07	-4.4246662	1.47E-06	1.34E-05	-2.392317423	0.373234893	0.910049036	hypothetical protein F2Q69_00033493 [Brassica cretica]	-	-	-	-
MSTRG.51569	CYP71B10	1.41	1.84	3.93	0.17	0.21	0.28	2.14	3.21	3.98	3.11	0.22	2.3933	3.443445914	1.34E-07	1.42E-06	0.377893237	0.178158534	0.690212967	PREDICTED: cytochrome P450 71B10 [Brassica oleracea var. oleracea] [Brassica oleracea]	-	-	-	-
MSTRG.51570	CYP71B10	4.29	4.23	5.13	0.35	0.37	0.54	6.19	5.33	5.92	5.8133	0.42	4.55	3.437405312	5.96E-32	3.23E-30	0.353499089	0.001125519	0.020211819	PREDICTED: cytochrome P450 71B10 [Brassica oleracea var. oleracea] [Brassica oleracea]	-	-	-	-
MSTRG.51581	PUB34	2.81	2.5	2.83	4.47	6.95	7.15	1.29	2.2	1.95	1.8133	6.19	2.7133	-1.189873116	0.010546611	0.040821697	-0.581422143	0.281139959	0.830744442	PREDICTED: U-box domain-containing protein 34 [Brassica oleracea var. oleracea] [Brassica oleracea]	-	-	GO:0004672//protein kinase activity;GO:0019787//ubiquitin-like protein transferase activity;GO:0032550//purine ribonucleoside binding	GO:0006796//phosphate-containing compound metabolic process;GO:0032446//protein modification by small protein conjugation;GO:0050896//response to stimulus
MSTRG.51773	CLPR2	3.2	2.78	2.65	1.46	0.95	0.93	4.25	3.07	1.51	2.9433	1.1133	2.8767	1.369512457	4.48E-05	0.000314086	0.033052878	0.479869009	0.969466748	ATP-dependent Clp protease proteolytic subunit 2 [Capsicum baccatum]	-	GO:0009368//endopeptidase Clp complex;GO:0009526//plastid envelope;GO:0009532//plastid stroma;GO:0031976//plastid thylakoid;GO:0044434//chloroplast part	GO:0016787//hydrolase activity	GO:0006355//regulation of transcription, DNA-templated;GO:0009658//chloroplast organization;GO:0009668//plastid membrane organization;GO:0016072//rRNA metabolic process;GO:0031399//regulation of protein modification process;GO:0043623//cellular protein complex assembly
MSTRG.51869	FEY	0	0.02	0.16	6.74	6.93	6.67	0.02	0	0	0.0067	6.78	0.06	-6.820178962	1.67E-10	2.45E-09	-3.169925001	0.286829727	0.835433156	PREDICTED: retinol dehydrogenase 11-like [Brassica oleracea var. oleracea] [Brassica oleracea]	-	-	GO:0016628//oxidoreductase activity, acting on the CH-CH group of donors, NAD or NADP as acceptor	GO:0044710//single-organism metabolic process
MSTRG.51977	HTH	0.29	0.08	0.1	1.21	0.67	0.91	0.34	0.17	0.09	0.2	0.93	0.1567	-2.56953246	0.001507124	0.007549445	0.352301744	0.419918138	0.937955899	BnaC03g15770D [Brassica napus]	ko01100//Metabolic pathways;ko00260//Glycine, serine and threonine metabolism	GO:0009536//plastid	GO:0000166//nucleotide binding;GO:0016614//oxidoreductase activity, acting on CH-OH group of donors;GO:0016829//lyase activity	GO:0044710//single-organism metabolic process;GO:0048437//floral organ development
MSTRG.52040	--	0.23	0.68	1.27	0	0	0	0.36	0.74	0.62	0.5733	0	0.7267	9.505149919	3.17E-05	0.000228867	-0.34191957	0.957368439	0.991320581	unnamed protein product [Brassica napus]	-	-	-	-
MSTRG.52047	--	0	0.25	0	1.62	1.28	2.17	0	0	0	0	1.69	0.0833	-4.341985747	0.000239391	0.001447135	-6.380821784	0.55882823	0.980399641	hypothetical protein F2Q69_00054143 [Brassica cretica]	-	-	-	-
MSTRG.52048	--	0.41	0.1	0.5	2.53	2.95	1.7	0.26	0.12	0	0.1267	2.3933	0.3367	-2.829628551	0.000750678	0.004052069	-1.410283969	0.345751179	0.889238227	hypothetical protein F2Q69_00054143 [Brassica cretica]	-	-	-	-
MSTRG.52080	--	1.14	1.11	0.89	2.99	2.12	3.15	0.17	0	0.15	0.1067	2.7533	1.0467	-1.395377223	0.021935865	0.075662625	-3.294620749	0.000101917	0.002690641	zinc finger BED domain-containing protein RICESLEEPER 2-like [Brassica napus]	-	-	-	-
MSTRG.52120	RGP4	2.41	1.54	1.84	8.71	8.32	9.32	0.46	1.03	0.82	0.77	8.7833	1.93	-2.186167709	7.79E-12	1.30E-10	-1.325670497	0.018078799	0.176378635	probable UDP-arabinopyranose mutase 4 isoform X2 [Brassica rapa]	ko00520//Amino sugar and nucleotide sugar metabolism	GO:0005795//Golgi stack;GO:0016020//membrane	GO:0005488//binding;GO:0016866//intramolecular transferase activity	GO:0044237//cellular metabolic process;GO:0044238//primary metabolic process;GO:0044710//single-organism metabolic process;GO:0044763//single-organism cellular process;GO:0050896//response to stimulus;GO:0071554//cell wall organization or biogenesis;GO:0071704//organic substance metabolic process
MSTRG.52138	At2g30020	0.69	0.79	0.3	2.31	2.27	2.36	0.45	0.1	0.13	0.2267	2.3133	0.5933	-1.963058422	0.002753391	0.01283129	-1.38827059	0.2182167	0.754541822	PREDICTED: probable protein phosphatase 2C 25 [Brassica oleracea var. oleracea] [Brassica oleracea]	-	GO:0009536//plastid	GO:0004721//phosphoprotein phosphatase activity;GO:0043169//cation binding	GO:0006464//cellular protein modification process;GO:0006950//response to stress;GO:0009620//response to fungus;GO:0009755//hormone-mediated signaling pathway;GO:0010374//stomatal complex development
MSTRG.52187	BIP2	6.26	6.48	4.53	18.62	18.14	11.27	3.86	4.61	3.54	4.0033	16.01	5.7567	-1.475667726	7.18E-05	0.000483285	-0.524031932	0.292797586	0.842457203	mediator of RNA polymerase II transcription subunit 37f [Brassica rapa]	ko04141//Protein processing in endoplasmic reticulum;ko03060//Protein export	GO:0005911//cell-cell junction;GO:0009536//plastid;GO:0030312//external encapsulating structure;GO:0031090//organelle membrane;GO:0043232//intracellular non-membrane-bounded organelle;GO:0043234//protein complex;GO:0044432//endoplasmic reticulum part	GO:0016628//oxidoreductase activity, acting on the CH-CH group of donors, NAD or NADP as acceptor;GO:0032550//purine ribonucleoside binding	GO:0000741//karyogamy;GO:0009725//response to hormone;GO:0010038//response to metal ion;GO:0010468//regulation of gene expression;GO:0022613//ribonucleoprotein complex biogenesis;GO:0033554//cellular response to stress;GO:0034645//cellular macromolecule biosynthetic process;GO:0043161//proteasome-mediated ubiquitin-dependent protein catabolic process;GO:0044710//single-organism metabolic process
MSTRG.52273	PRA1B3	0.62	0.54	0.74	0.38	0.34	0.21	1.12	0.99	0.85	0.9867	0.31	0.6333	1.030696797	0.005644335	0.023928989	0.639597757	0.040504085	0.30336655	Calycin [Arabidopsis suecica]	-	GO:0031090//organelle membrane;GO:0031224//intrinsic component of membrane;GO:0043231//intracellular membrane-bounded organelle	-	GO:0006810//transport
MSTRG.52376	--	0.78	0.63	0.61	3.78	2.68	2.8	0.2	0.19	0.28	0.2233	3.0867	0.6733	-2.196656901	7.86E-06	6.32E-05	-1.592122292	0.050069047	0.347222527	Pentatricopeptide repeat (PPR) superfamily protein [Arabidopsis thaliana]	-	-	-	-
MSTRG.52424	RPL18AB	5.38	4.95	3.25	12.8	10.56	10.77	3.86	3.51	4.15	3.84	11.3767	4.5267	-1.329556935	0.002129027	0.010266396	-0.237342763	0.699453917	0.980399641	PREDICTED: 60S ribosomal protein L18a-2-like [Raphanus sativus]	ko03010//Ribosome	GO:0005911//cell-cell junction;GO:0015934//large ribosomal subunit;GO:0031090//organelle membrane	GO:0005198//structural molecule activity	GO:0010467//gene expression;GO:0022613//ribonucleoprotein complex biogenesis;GO:0044248//cellular catabolic process;GO:0071555//cell wall organization
MSTRG.52437	--	0.17	0.36	0	3.74	3.77	3.64	0	0	0	0	3.7167	0.1767	-4.39490754	4.68E-09	5.93E-08	-7.464886049	0.150739038	0.637455503	BnaUnng04400D, partial [Brassica napus]	-	-	-	GO:0000041//transition metal ion transport;GO:0001101//response to acid chemical;GO:0009267//cellular response to starvation;GO:0015698//inorganic anion transport
MSTRG.52515	--	5.57	6.52	5.32	20	20.21	18.57	2.94	3.27	2.55	2.92	19.5933	5.8033	-1.755409156	2.41E-17	6.14E-16	-0.990913428	0.001005142	0.018439326	unnamed protein product [Brassica napus]	-	-	-	-
MSTRG.52562	--	1.45	1.2	1.13	0.17	0.1	0.02	0.39	0.84	0.54	0.59	0.0967	1.26	3.704261429	1.80E-12	3.19E-11	-1.094636874	0.079923422	0.458791755	hypothetical protein F2Q68_00001582 [Brassica cretica]	-	-	-	-
MSTRG.52612	--	0.08	0.14	0.14	0.53	1.06	0.97	0.15	0.08	0.04	0.09	0.8533	0.12	-2.830074999	0.00339983	0.015433437	-0.415037499	0.968865259	0.99352701	unnamed protein product [Brassica napus]	-	-	-	-
MSTRG.52669	--	22.59	9.63	11.99	8.48	8.47	4.97	6.98	1.38	4.11	4.1567	7.3067	14.7367	1.012124936	2.69E-07	2.72E-06	-1.825911269	0.037815884	0.290435682	Tetratricopeptide repeat protein 1 [Ananas comosus]	-	-	GO:0031072//heat shock protein binding	-
MSTRG.52799	PCMP-H29	3.2	2.78	4.41	0.02	0.01	0.05	5.38	6.09	5.46	5.6433	0.0267	3.4633	7.020979939	2.38E-35	1.49E-33	0.704386319	5.18E-07	2.53E-05	PREDICTED: pentatricopeptide repeat-containing protein At2g41080 [Raphanus sativus]	-	GO:0043231//intracellular membrane-bounded organelle	-	-
MSTRG.52808	--	52.43	57.99	50.52	66.68	70.45	66.19	24.28	33.48	22.67	26.81	67.7733	53.6467	-0.337229198	0.005846191	0.024664595	-1.000717313	3.23E-05	0.00098593	transmembrane protein [Arabidopsis thaliana]	-	-	-	-
MSTRG.52889	--	0.14	0	0.06	0.65	1.45	0.78	0.2	0.08	0.07	0.1167	0.96	0.0667	-3.847996907	0.006632564	0.027504316	0.807354922	0.541805822	0.980399641	-	-	-	-	-
MSTRG.52912	POLD2	0.62	0.35	0.32	1.34	1.47	2.21	0.12	0.28	0.05	0.15	1.6733	0.43	-1.960316299	0.001177703	0.006061412	-1.519374159	0.082094893	0.466087397	BnaA04g24920D [Brassica napus]	-	-	-	-
MSTRG.52914	--	0	0	0	1.66	5.21	6.36	0	0	0	0	4.41	0	-12.10656294	6.58E-08	7.24E-07	0	1	1	BnaC03g24080D [Brassica napus]	-	-	-	-
MSTRG.5294	--	0.42	0.08	0	3.24	8.68	4.9	0	0.09	0	0.03	5.6067	0.1667	-5.0721058	4.59E-08	5.15E-07	-2.473931188	0.418783079	0.937500216	PREDICTED: defensin-like protein 24 [Raphanus sativus]	-	-	-	-
MSTRG.5295	--	0	0	0	0.86	2.37	1.11	0	0	0	0	1.4467	0	-10.49851683	0.00038028	0.002199508	0	1	1	PREDICTED: defensin-like protein 24 [Raphanus sativus]	-	-	-	-
MSTRG.52953	--	55.7	50.75	51.78	9.97	10.07	11.9	67.09	55.16	66.71	62.9867	10.6467	52.7433	2.308586939	2.03E-124	8.18E-122	0.256057713	4.75E-07	2.34E-05	hypothetical protein F2Q69_00002232 [Brassica cretica]	-	-	-	-
MSTRG.52958	--	0.44	0.18	0.59	1.94	2.25	1.72	0.05	0.31	0.1	0.1533	1.97	0.4033	-2.288151083	0.002323371	0.011074424	-1.395301281	0.294051412	0.843595961	BnaC06g07610D [Brassica napus]	-	-	-	-
MSTRG.52971	--	0.09	0.11	0.04	0.8	0.48	0.75	0	0.07	0.04	0.0367	0.6767	0.08	-3.080373416	0.006031629	0.025353681	-1.125530882	0.575244537	0.980399641	BnaC06g31840D [Brassica napus]	-	GO:0009536//plastid	GO:0008757//S-adenosylmethionine-dependent methyltransferase activity;GO:0046914//transition metal ion binding	GO:0005982//starch metabolic process;GO:0005984//disaccharide metabolic process;GO:0006090//pyruvate metabolic process;GO:0009658//chloroplast organization;GO:0009668//plastid membrane organization;GO:0016070//RNA metabolic process
MSTRG.52982	At2g44790	0.19	0	0.25	0.87	2.41	2.08	0	0.1	0.33	0.1433	1.7867	0.1467	-3.606657572	0.000307216	0.001812427	-0.033166864	0.847443236	0.980399641	PREDICTED: uclacyanin-2-like [Brassica oleracea var. oleracea] [Brassica oleracea]	-	GO:0005911//cell-cell junction;GO:0031225//anchored component of membrane	GO:0046914//transition metal ion binding	GO:0001101//response to acid chemical;GO:0006950//response to stress;GO:0009699//phenylpropanoid biosynthetic process;GO:0015698//inorganic anion transport
MSTRG.53003	ZPR1	4.53	4.02	4.39	5.25	4.97	4.08	1.63	1.89	0.98	1.5	4.7667	4.3133	-0.14417753	0.046272989	0.139342692	-1.523840711	0.000592059	0.012001394	protein LITTLE ZIPPER 1-like [Brassica napus]	-	-	GO:0005488//binding	-
MSTRG.53060	ARF11	0.45	0.61	0.56	5.39	5.2	5.14	0.3	0.29	0.23	0.2733	5.2433	0.54	-3.279452953	1.06E-25	4.32E-24	-0.982297998	0.187490541	0.708029141	PREDICTED: auxin response factor 11-like isoform X1 [Brassica oleracea var. oleracea] [Brassica oleracea]	-	GO:0005911//cell-cell junction;GO:0043231//intracellular membrane-bounded organelle	GO:0001071//nucleic acid binding transcription factor activity;GO:0005515//protein binding	GO:0009755//hormone-mediated signaling pathway;GO:0010468//regulation of gene expression;GO:0034645//cellular macromolecule biosynthetic process
MSTRG.53064	ESFL10	0.88	0.34	0.2	7.54	20.18	9.64	0.11	0.39	0.12	0.2067	12.4533	0.4733	-4.71753162	1.37E-10	2.04E-09	-1.195550809	0.490805987	0.975137103	pollen coat protein B13 [Brassica oleracea]	-	-	-	-
MSTRG.53065	--	0.25	0.26	0	3.63	14.1	6.77	0	0.36	0	0.12	8.1667	0.17	-5.586140692	1.92E-06	1.71E-05	-0.502500341	0.979369216	0.995443492	pollen coat protein B13 [Brassica oleracea]	-	-	-	-
MSTRG.53082	--	3.63	4.16	3.36	8.68	10.39	9.8	3.27	3.38	2.78	3.1433	9.6233	3.7167	-1.372527397	0.000192911	0.001193719	-0.241714034	0.72425701	0.980399641	hypothetical protein HID58_090238 [Brassica napus]	-	-	-	-
MSTRG.53167	OTU11	0.43	0.48	0.42	3.52	3.21	2.03	0.15	0.12	0	0.09	2.92	0.4433	-2.719504624	2.21E-05	0.00016399	-2.300394933	0.081820985	0.46534215	OTU domain [Arabidopsis thaliana x Arabidopsis arenosa]	-	GO:0009536//plastid;GO:0016020//membrane	GO:0070011//peptidase activity, acting on L-amino acid peptides	GO:0019538//protein metabolic process
MSTRG.53197	SCPL20	0.35	0.12	0.14	1.67	1.99	1.87	0.29	0.36	0	0.2167	1.8433	0.2033	-3.180398333	1.07E-06	9.88E-06	0.091630475	0.694875628	0.980399641	serine carboxypeptidase-like 20 isoform X2 [Brassica napus]	-	-	GO:0004180//carboxypeptidase activity	GO:0019538//protein metabolic process
MSTRG.53269	Klhdc4	6.69	5.58	4.86	11.78	13.71	11.42	5.76	6	5.55	5.77	12.3033	5.71	-1.107486586	0.001303861	0.006642387	0.015080573	0.021427819	0.199001318	PREDICTED: kelch domain-containing protein 4 [Brassica oleracea var. oleracea] [Brassica oleracea]	-	-	-	GO:0044765//single-organism transport
MSTRG.53361	--	0.24	0.65	0.52	2.77	6.97	2.81	0.95	0.37	0.35	0.5567	4.1833	0.47	-3.153920296	0.000106326	0.000690567	0.24415294	0.554925792	0.980399641	BnaC03g44790D [Brassica napus]	-	-	-	-
MSTRG.53481	BDG3	2.01	1.82	4.64	0.44	0.21	0.57	6.62	7.57	9.41	7.8667	0.4067	2.8233	2.795480822	8.58E-12	1.42E-10	1.478352985	5.57E-08	3.33E-06	probable lysophospholipase BODYGUARD 3 [Brassica napus]	-	GO:0005618//cell wall	GO:0003824//catalytic activity	GO:0006950//response to stress;GO:0009059//macromolecule biosynthetic process;GO:0010565//regulation of cellular ketone metabolic process
MSTRG.53483	At4g30570	1.27	1.69	1.05	3.03	2.76	2.79	0.25	0.39	0.27	0.3033	2.86	1.3367	-1.097375411	0.107768887	0.268804447	-2.139663786	0.000345736	0.00764526	probable mannose-1-phosphate guanylyltransferase 3 [Brassica rapa]	ko01100//Metabolic pathways;ko01110//Biosynthesis of secondary metabolites;ko00520//Amino sugar and nucleotide sugar metabolism;ko00051//Fructose and mannose metabolism	GO:0043231//intracellular membrane-bounded organelle;GO:0044444//cytoplasmic part	GO:0008905//mannose-phosphate guanylyltransferase activity;GO:0032550//purine ribonucleoside binding	GO:0000302//response to reactive oxygen species;GO:0001101//response to acid chemical;GO:0006006//glucose metabolic process;GO:0006970//response to osmotic stress;GO:0006996//organelle organization;GO:0009226//nucleotide-sugar biosynthetic process;GO:0009617//response to bacterium;GO:0019852//L-ascorbic acid metabolic process;GO:0030243//cellulose metabolic process;GO:0051603//proteolysis involve…
MSTRG.53537	--	12.22	9.6	8.16	25.77	31.99	22.86	5.39	4.61	4.51	4.8367	26.8733	9.9933	-1.4271374	0.000106734	0.000692951	-1.046952864	0.004680986	0.064479282	EMBRYO SURROUNDING FACTOR 1.2 [Arabidopsis lyrata subsp. lyrata] [Arabidopsis lyrata]	-	-	-	-
MSTRG.53600	--	2.19	1.76	1.86	6.9	8.9	6.94	1.52	1.6	1.54	1.5533	7.58	1.9367	-1.968622185	3.72E-05	0.000264666	-0.318208209	0.856602931	0.980399641	hypothetical protein F2Q69_00033414 [Brassica cretica]	-	-	-	-
MSTRG.53610	--	1.26	1.87	1.66	0	0.15	0.22	1.09	2.46	1.67	1.74	0.1233	1.5967	3.69442848	1.04E-09	1.42E-08	0.124024151	0.298727192	0.847073536	unnamed protein product [Brassica napus]	-	-	-	-
MSTRG.53617	XTH9	4.43	8.11	3.83	9.4	6.63	9.8	0.45	1.15	0.87	0.8233	8.61	5.4567	-0.657993322	0.907742711	0.983281028	-2.728471375	5.12E-09	3.72E-07	PREDICTED: xyloglucan endotransglucosylase/hydrolase protein 9 [Brassica oleracea var. oleracea] [Brassica oleracea]	-	GO:0005576//extracellular region;GO:0030312//external encapsulating structure	GO:0016758//transferase activity, transferring hexosyl groups;GO:0016787//hydrolase activity	GO:0044042//glucan metabolic process;GO:0045229//external encapsulating structure organization;GO:0048509//regulation of meristem development
MSTRG.53685	At1g56220	78.3	81.21	88.74	16.06	18.6	24.31	99.69	87.87	64.83	84.13	19.6567	82.75	2.073740618	4.62E-64	6.22E-62	0.023861032	0.018390762	0.178410237	PREDICTED: dormancy-associated protein homolog 3-like isoform X1 [Raphanus sativus]	-	GO:0043231//intracellular membrane-bounded organelle	-	GO:0008104//protein localization;GO:0009725//response to hormone
MSTRG.53686	At1g56220	1.63	2	2.02	0.52	0.52	0.74	2.45	1.5	1.88	1.9433	0.5933	1.8833	1.666373626	3.40E-07	3.39E-06	0.045245016	0.339673839	0.882668274	dormancy-associated protein homolog 3 isoform X6 [Brassica rapa]	-	GO:0043231//intracellular membrane-bounded organelle	-	GO:0008104//protein localization;GO:0009725//response to hormone
MSTRG.53700	SD18	6.08	5.85	4.83	10.45	12.52	11.14	3.63	4.39	3.85	3.9567	11.37	5.5867	-1.025172606	0.002084568	0.010077604	-0.497702214	0.255210382	0.802044263	PREDICTED: LOW QUALITY PROTEIN: receptor-like serine/threonine-protein kinase SD1-8 [Brassica oleracea var. oleracea] [Brassica oleracea]	-	-	-	-
MSTRG.53721	--	0.59	0.58	0.26	0.11	0.09	0.35	0.28	0.25	0.65	0.3933	0.1833	0.4767	1.378511623	0.008801599	0.034985948	-0.277228287	0.89480869	0.980399641	BnaCnng11360D [Brassica napus]	-	GO:0016020//membrane;GO:0043231//intracellular membrane-bounded organelle	GO:0003824//catalytic activity	GO:0006259//DNA metabolic process;GO:0044763//single-organism cellular process
MSTRG.53722	MGP4	1.33	1.39	1.42	4.79	5.46	5.48	0.4	1.04	0.66	0.7	5.2433	1.38	-1.925815998	4.12E-08	4.65E-07	-0.97924144	0.130661049	0.593499255	PREDICTED: UDP-D-xylose:L-fucose alpha-1,3-D-xylosyltransferase MGP4-like [Brassica oleracea var. oleracea] [Brassica oleracea]	-	GO:0009536//plastid;GO:0031224//intrinsic component of membrane	GO:0008194//UDP-glycosyltransferase activity	GO:0010396//rhamnogalacturonan II metabolic process
MSTRG.53747	--	43.35	17.18	16.15	182.85	250.26	226.25	1.41	1.69	1.47	1.5233	219.7867	25.56	-3.104144127	9.61E-08	1.03E-06	-4.068584267	6.83E-18	1.90E-15	hypothetical protein HID58_010773 [Brassica napus]	-	-	-	-
MSTRG.53774	At4g01160	0.08	0.05	0.02	0.26	0.99	1.18	0	0.03	0	0.01	0.81	0.05	-4.017921908	0.000174662	0.001089837	-2.321928095	0.364662468	0.905134387	PREDICTED: BTB/POZ domain-containing protein At4g01160 [Brassica oleracea var. oleracea] [Brassica oleracea]	-	GO:0043231//intracellular membrane-bounded organelle	GO:0046983//protein dimerization activity	GO:0003002//regionalization;GO:0003006//developmental process involved in reproduction;GO:0009639//response to red or far red light
MSTRG.53883	AFP1	4.32	2.14	2.93	0.55	0.26	0.51	1.23	1.11	0.44	0.9267	0.44	3.13	2.830587228	1.27E-09	1.71E-08	-1.756040275	0.010098103	0.114740581	defensin-like protein 3 [Brassica napus]	ko04016//MAPK signaling pathway - plant	GO:0044464//cell part	-	GO:0000160//phosphorelay signal transduction system;GO:0009611//response to wounding;GO:0009685//gibberellin metabolic process;GO:0010476//gibberellin mediated signaling pathway;GO:0051707//response to other organism
MSTRG.53967	NUP98B	1.24	2.1	1.49	1.46	1.43	1.36	0.74	0.68	0.55	0.6567	1.4167	1.61	0.184560348	0.00174397	0.008600735	-1.293827559	0.00195257	0.031926273	BnaC03g34800D [Brassica napus]	ko03013//Nucleocytoplasmic transport	GO:0012505//endomembrane system;GO:0043231//intracellular membrane-bounded organelle;GO:0046930//pore complex	GO:0005488//binding	GO:0008104//protein localization;GO:0050658//RNA transport
MSTRG.53997	--	1.05	0.99	0.92	0.09	0.09	0.2	0.97	0.96	1.96	1.2967	0.1267	0.9867	2.961525852	6.56E-10	9.13E-09	0.394172979	0.077942529	0.452209604	RING/U-box superfamily protein [Arabidopsis thaliana]	-	-	GO:0005515//protein binding;GO:0046914//transition metal ion binding	-
MSTRG.54035	DTX43	6.02	5.61	7.32	16.19	16.66	20.98	3.26	4.33	3.61	3.7333	17.9433	6.3167	-1.506212577	1.24E-06	1.14E-05	-0.758699116	0.033882527	0.270465427	PREDICTED: MATE efflux family protein FRD3 isoform X1 [Brassica oleracea var. oleracea] [Brassica oleracea]	-	GO:0031224//intrinsic component of membrane	GO:0015142//tricarboxylic acid transmembrane transporter activity;GO:0015291//secondary active transmembrane transporter activity	GO:0000041//transition metal ion transport;GO:0001101//response to acid chemical;GO:0009267//cellular response to starvation;GO:0009723//response to ethylene;GO:0010039//response to iron ion;GO:0015698//inorganic anion transport;GO:0015893//drug transport;GO:0034614//cellular response to reactive oxygen species;GO:0044249//cellular biosynthetic process;GO:0044711//single-organism biosynthetic pro…
MSTRG.54114	--	14.23	9.39	10.61	11.87	9.14	16.13	3.59	4.56	3.89	4.0133	12.38	11.41	-0.117712523	0.027800559	0.092094931	-1.5074259	1.90E-09	1.53E-07	BnaAnng37760D [Brassica napus]	-	-	-	-
MSTRG.54121	--	1.33	0.71	0.22	1.35	2.04	3.43	0.11	0.12	0	0.0767	2.2733	0.7533	-1.593448967	0.089695176	0.233679816	-3.296617006	0.000996276	0.018336203	hypothetical protein Bca52824_053923 [Brassica carinata]	-	-	-	-
MSTRG.54133	REM7	0.33	0.16	0.74	0	0	0	1.79	1	1.65	1.48	0	0.41	8.6794801	1.84E-06	1.65E-05	1.851901361	7.77E-05	0.002138686	PREDICTED: B3 domain-containing protein REM7-like [Brassica oleracea var. oleracea] [Brassica oleracea]	-	GO:0043231//intracellular membrane-bounded organelle	-	-
MSTRG.54148	CCT7	2.83	3.48	3.46	6.46	6.9	7.4	2.1	2.66	1.72	2.16	6.92	3.2567	-1.087375976	0.008253543	0.033153925	-0.592364749	0.246330903	0.789844128	T-complex protein 1 subunit eta-like [Brassica napus]	-	GO:0044444//cytoplasmic part	GO:0005515//protein binding;GO:0032550//purine ribonucleoside binding;GO:0042623//ATPase activity, coupled	GO:0006006//glucose metabolic process;GO:0006090//pyruvate metabolic process;GO:0006725//cellular aromatic compound metabolic process;GO:0006970//response to osmotic stress;GO:0010038//response to metal ion;GO:0044267//cellular protein metabolic process;GO:0071555//cell wall organization
MSTRG.54225	--	1.67	1.56	1.5	0.28	0.03	0.32	0.63	0.56	0.8	0.6633	0.21	1.5767	2.90841645	7.52E-09	9.31E-08	-1.249071753	0.038597385	0.294408434	Zinc finger protein [Thalictrum thalictroides]	-	-	-	-
MSTRG.54232	RPS10	0.95	1.32	1.35	3.96	3.64	3.83	0.76	0.86	1.11	0.91	3.81	1.2067	-1.658763801	0.00012541	0.00080476	-0.407088746	0.829926043	0.980399641	PREDICTED: 30S ribosomal protein S10, chloroplastic-like [Brassica oleracea var. oleracea] [Brassica oleracea]	ko03010//Ribosome	GO:0009532//plastid stroma;GO:0030529//intracellular ribonucleoprotein complex	GO:0003676//nucleic acid binding;GO:0005198//structural molecule activity	GO:0006090//pyruvate metabolic process;GO:0006779//porphyrin-containing compound biosynthetic process;GO:0009658//chloroplast organization;GO:0009668//plastid membrane organization;GO:0010467//gene expression;GO:0016072//rRNA metabolic process
MSTRG.54320	--	5.52	4.8	4.08	1.44	0.74	0.71	3.84	3.62	2.95	3.47	0.9633	4.8	2.316927414	8.91E-21	2.80E-19	-0.468098743	0.537305725	0.980399641	Ribonuclease H domain [Arabidopsis thaliana x Arabidopsis arenosa]	-	-	-	-
MSTRG.54363	UBC25	0.68	0.93	0.92	5.08	5.19	5.2	0.27	0.2	0.4	0.29	5.1567	0.8433	-2.612263907	5.19E-17	1.29E-15	-1.540050079	0.013848816	0.145074276	PREDICTED: probable ubiquitin-conjugating enzyme E2 25 [Raphanus sativus]	ko04120//Ubiquitin mediated proteolysis	GO:0044424//intracellular part	GO:0003824//catalytic activity	-
MSTRG.54390	--	1.66	0.45	0.82	0.36	0.14	0.31	0.39	0.25	0.16	0.2667	0.27	0.9767	1.854906852	7.25E-05	0.00048803	-1.87282876	0.018340544	0.178089761	Harbinger transposase-derived protein [Arabidopsis suecica]	-	-	-	-
MSTRG.54395	--	0.62	0.68	0	0	0	0	0	0	0	0	0	0.4333	8.759333407	0.002589906	0.012167838	-8.759333407	0.019190327	0.184224347	BnaCnng77300D, partial [Brassica napus]	-	-	-	-
MSTRG.54433	--	0.43	0.41	0.23	0.93	1.59	1.27	0.27	0.25	0.23	0.25	1.2633	0.3567	-1.824587052	0.012033335	0.045699652	-0.512648296	0.807445865	0.980399641	BnaAnng07200D [Brassica napus]	-	-	-	-
MSTRG.5463	DSC2	0.07	0.06	0.05	0.22	0.38	0.29	0.05	0.05	0.08	0.06	0.2967	0.06	-2.30580843	0.003659781	0.016469111	0	0.686594498	0.980399641	disease resistance protein TAO1-like [Brassica napus]	-	-	-	GO:0006950//response to stress;GO:0009617//response to bacterium
MSTRG.54637	--	2.25	1.99	2.81	0.22	0.37	0.33	1.59	2.44	2.1	2.0433	0.3067	2.35	2.937917491	7.65E-16	1.76E-14	-0.201736184	0.716235213	0.980399641	unnamed protein product [Brassica oleracea]	-	-	-	-
MSTRG.5470	--	0.23	0.8	0.52	3.03	3.54	3.31	0.71	0.48	0.76	0.65	3.2933	0.5167	-2.672242826	0.000188815	0.001170712	0.331205908	0.409131023	0.933131497	caffeoylshikimate esterase [Brassica rapa]	-	GO:0016020//membrane;GO:0044424//intracellular part	GO:0003824//catalytic activity	GO:0016458//gene silencing;GO:0030001//metal ion transport;GO:0034968//histone lysine methylation
MSTRG.54705	At2g39360	0.85	0.62	1.17	0	0	0.04	1.75	1.54	2.21	1.8333	0.0133	0.88	6.044394119	1.21E-06	1.12E-05	1.058893689	0.001990461	0.032451935	probable receptor-like protein kinase At2g39360 [Arabidopsis lyrata subsp. lyrata] [Arabidopsis lyrata]	-	GO:0016020//membrane	GO:0004672//protein kinase activity	GO:0001101//response to acid chemical;GO:0001558//regulation of cell growth;GO:0015698//inorganic anion transport;GO:0016310//phosphorylation
MSTRG.54706	MYOB1	1.21	1.4	2.67	0.72	0.6	0.34	3.7	2.13	3.77	3.2	0.5533	1.76	1.669354688	1.36E-05	0.000105166	0.862496476	0.003749623	0.054049493	PREDICTED: myosin-binding protein 1 [Brassica oleracea var. oleracea] [Brassica oleracea]	-	-	-	-
MSTRG.54711	--	0.08	0.14	0	0.86	0.89	0.92	0	0	0	0	0.89	0.0733	-3.601264313	0.011341714	0.043464257	-6.196397213	0.613318757	0.980399641	hypothetical protein Bca52824_051515 [Brassica carinata]	-	-	-	-
MSTRG.54721	SCPL16	6.49	6.2	7.31	0.24	0.04	0.16	7.78	8.47	9.24	8.4967	0.1467	6.6667	5.506352666	1.26E-32	6.98E-31	0.349931373	0.000381952	0.008293305	PREDICTED: serine carboxypeptidase-like 7 isoform X1 [Raphanus sativus]	-	GO:0005618//cell wall;GO:0043231//intracellular membrane-bounded organelle	GO:0004180//carboxypeptidase activity;GO:0016753//O-sinapoyltransferase activity	GO:0000097//sulfur amino acid biosynthetic process;GO:0006090//pyruvate metabolic process;GO:0006544//glycine metabolic process;GO:0006633//fatty acid biosynthetic process;GO:0006732//coenzyme metabolic process;GO:0006753//nucleoside phosphate metabolic process;GO:0009683//indoleacetic acid metabolic process;GO:0009694//jasmonic acid metabolic process;GO:0019538//protein metabolic process
MSTRG.54722	--	0.41	0.54	0.11	1.64	1.99	1.62	0.06	0.03	0.1	0.0633	1.75	0.3533	-2.308253158	0.001280206	0.006535486	-2.479992941	0.045001902	0.32433321	probable serine/threonine-protein kinase At1g54610 [Brassica rapa]	-	-	GO:0004672//protein kinase activity;GO:0097159//organic cyclic compound binding;GO:1901363//heterocyclic compound binding	GO:0044238//primary metabolic process;GO:0044260//cellular macromolecule metabolic process
MSTRG.54766	--	0.82	0.94	0.82	5.91	6.05	4.57	0.3	0.4	0.2	0.3	5.51	0.86	-2.679643754	2.85E-16	6.75E-15	-1.519374159	0.013341492	0.141142602	NLI interacting factor family protein [Arabidopsis lyrata subsp. lyrata] [Arabidopsis lyrata]	ko03013//Nucleocytoplasmic transport	GO:0005623//cell	GO:0003824//catalytic activity	GO:0003006//developmental process involved in reproduction;GO:0006464//cellular protein modification process;GO:0009628//response to abiotic stimulus;GO:0009791//post-embryonic development;GO:0044763//single-organism cellular process;GO:0048731//system development;GO:0050789//regulation of biological process
MSTRG.54788	CML11	0.03	0.09	0.03	0.84	0.98	0.15	0	0	0.11	0.0367	0.6567	0.05	-3.715161224	0.006188446	0.025910958	-0.447458977	0.826119246	0.980399641	PREDICTED: calmodulin-like protein 8 [Brassica oleracea var. oleracea] [Brassica oleracea]	ko04626//Plant-pathogen interaction	GO:0031090//organelle membrane;GO:0043231//intracellular membrane-bounded organelle;GO:0044444//cytoplasmic part	GO:0016628//oxidoreductase activity, acting on the CH-CH group of donors, NAD or NADP as acceptor;GO:0046872//metal ion binding	GO:0006928//movement of cell or subcellular component;GO:0009593//detection of chemical stimulus;GO:0009605//response to external stimulus;GO:0016192//vesicle-mediated transport;GO:0019932//second-messenger-mediated signaling;GO:0044710//single-organism metabolic process;GO:0051640//organelle localization
MSTRG.54802	CES101	0.2	0.31	0.22	0.05	0.15	0	0.05	0.04	0.18	0.09	0.0667	0.2433	1.867896464	0.009033234	0.035757567	-1.434937057	0.128461149	0.589291687	G-type lectin S-receptor-like serine/threonine-protein kinase CES101 isoform X1 [Brassica napus]	-	-	GO:0004672//protein kinase activity;GO:0005488//binding	GO:0006796//phosphate-containing compound metabolic process;GO:0006952//defense response;GO:0051707//response to other organism
MSTRG.54840	--	0	0	0.11	0.94	1.93	0.36	0.06	0.06	0.18	0.1	1.0767	0.0367	-4.875958736	0.002621668	0.012294245	1.447458977	0.40295963	0.929830903	BnaC03g44790D [Brassica napus]	-	-	-	-
MSTRG.54887	--	3.01	3.47	2.52	1.36	1.2	1.74	1.98	2.62	2.38	2.3267	1.4333	3	1.065588342	9.50E-09	1.16E-07	-0.366697965	0.902741519	0.980399641	hypothetical protein IGI04_006694 [Brassica rapa subsp. trilocularis] [Brassica rapa]	-	-	-	-
MSTRG.54903	At1g58055	0	0	0	0.96	2.25	1.79	0	0	0	0	1.6667	0	-10.70274988	0.0014298	0.00721141	0	1	1	BnaCnng23100D [Brassica napus]	-	-	-	-
MSTRG.54955	--	0.06	0.05	0.05	1.23	0.8	0.43	0	0.25	0	0.0833	0.82	0.0533	-3.942514505	0.004580213	0.019991889	0.64385619	0.677362617	0.980399641	Glycosyl transferase family 14 [Arabidopsis suecica]	-	GO:0043231//intracellular membrane-bounded organelle	GO:0008194//UDP-glycosyltransferase activity	GO:0006637//acyl-CoA metabolic process;GO:0016129//phytosteroid biosynthetic process
MSTRG.54957	ABCG5	13.5	14.8	14.43	4.79	5.1	4.51	12.73	14.69	12.54	13.32	4.8	14.2433	1.569180505	9.20E-63	1.20E-60	-0.096692734	0.049809111	0.346225769	PREDICTED: ABC transporter G family member 5 [Brassica oleracea var. oleracea] [Brassica oleracea]	-	GO:0031224//intrinsic component of membrane	GO:0015604//organic phosphonate transmembrane transporter activity;GO:0017111//nucleoside-triphosphatase activity;GO:0032550//purine ribonucleoside binding	GO:0009886//post-embryonic morphogenesis;GO:0044765//single-organism transport
MSTRG.54974	--	13.19	6.6	2.83	10.37	7.24	23.11	0.68	1.5	1.32	1.1667	13.5733	7.54	-0.848138632	0.711448792	0.886305996	-2.692172102	1.48E-05	0.000503478	BnaC07g15850D [Brassica napus]	-	-	-	-
MSTRG.54975	--	3.29	1.54	1	2.54	2.45	6.55	0.13	0.44	0.24	0.27	3.8467	1.9433	-0.985075435	0.517575711	0.77015937	-2.84750207	7.77E-05	0.00213845	BnaC07g15840D [Brassica napus]	-	-	-	-
MSTRG.54976	--	12.5	4.98	3.06	9.47	8.02	18.75	0.82	1.61	1.12	1.1833	12.08	6.8467	-0.819146774	0.756879695	0.916591778	-2.532545252	1.06E-06	4.82E-05	BnaC07g15850D [Brassica napus]	-	-	-	-
MSTRG.55008	--	0.59	0.13	0.19	2.68	3.14	2.02	0.1	0.04	0.07	0.07	2.6133	0.3033	-3.106915204	4.80E-06	4.02E-05	-2.115477217	0.133182561	0.599994946	O-fucosyltransferase 31 [Morus notabilis]	-	-	GO:0016740//transferase activity	-
MSTRG.55018	CLPB3	0.7	0.85	0.46	3.04	4.84	2.5	0.33	0.09	0.26	0.2267	3.46	0.67	-2.368539037	0.001652614	0.008197135	-1.56358885	0.239506321	0.784245698	PREDICTED: chaperone protein ClpB3, chloroplastic-like [Brassica oleracea var. oleracea] [Brassica oleracea]	-	-	-	-
MSTRG.55055	--	1.44	1.85	2.31	15.59	10.74	13.26	0.3	1.03	1.37	0.9	13.1967	1.8667	-2.821637335	4.26E-12	7.29E-11	-1.05246742	0.241594891	0.785933351	BnaC03g47720D [Brassica napus]	-	GO:0005911//cell-cell junction;GO:0016020//membrane	GO:0003824//catalytic activity	GO:0006950//response to stress
MSTRG.55095	--	2.86	2.16	2.58	8.53	8.89	8.6	2.38	1.86	1.9	2.0467	8.6733	2.5333	-1.775549638	4.46E-06	3.75E-05	-0.307760763	0.942499819	0.987703541	LOW QUALITY PROTEIN: hypothetical protein HID58_054579 [Brassica napus]	-	-	-	-
MSTRG.55114	--	1.39	1.58	0.95	0.84	0.36	0.54	1.28	1.39	0.75	1.14	0.58	1.3067	1.171766348	0.000294732	0.00174506	-0.196857329	0.758458054	0.980399641	B3 domain-containing transcription repressor VAL1-like isoform X1 [Brassica napus]	-	-	-	-
MSTRG.55119	--	0.09	0.08	0	3.9	16.82	17.2	0	0.1	0	0.0333	12.64	0.0567	-7.801280408	6.80E-10	9.45E-09	-0.765534746	0.892016968	0.980399641	unnamed protein product [Brassica napus]	-	-	-	-
MSTRG.55165	--	5.59	6.37	5.49	2.73	1.67	1.96	4.51	5.15	2.93	4.1967	2.12	5.8167	1.456128366	7.33E-20	2.18E-18	-0.470948753	0.53270719	0.980399641	Harbinger transposase-derived protein [Arabidopsis suecica]	-	-	-	-
MSTRG.55200	OFUT39	8.93	8.87	11.47	2.88	2.35	1.93	16.14	15.03	17.33	16.1667	2.3867	9.7567	2.031391253	2.66E-39	1.95E-37	0.728562002	9.25E-13	1.28E-10	O-fucosyltransferase 39 isoform X1 [Brassica rapa]	-	-	GO:0016740//transferase activity	-
MSTRG.55299	POLD1	4.12	3.72	3.54	8.84	8.18	7.37	3.1	2.91	2.95	2.9867	8.13	3.7933	-1.0997892	0.000251627	0.001513549	-0.34492992	0.930747406	0.984999843	DNA polymerase delta catalytic subunit [Brassica rapa]	ko01100//Metabolic pathways;ko03420//Nucleotide excision repair;ko03440//Homologous recombination;ko03030//DNA replication;ko03430//Mismatch repair;ko00230//Purine metabolism;ko00240//Pyrimidine metabolism;ko03410//Base excision repair	GO:0043231//intracellular membrane-bounded organelle	GO:0003676//nucleic acid binding;GO:0004518//nuclease activity;GO:0034061//DNA polymerase activity;GO:0036094//small molecule binding;GO:0046872//metal ion binding	GO:0006259//DNA metabolic process
MSTRG.55374	TUBB2	14.41	16.98	15.43	62.56	61.86	61.31	7.39	7.98	5.7	7.0233	61.91	15.6067	-1.988010026	1.00E-46	9.18E-45	-1.15193462	6.39E-08	3.77E-06	tubulin beta-2 chain [Camelina sativa]	ko04145//Phagosome	GO:0005911//cell-cell junction;GO:0015630//microtubule cytoskeleton;GO:0016020//membrane;GO:0030312//external encapsulating structure;GO:0043231//intracellular membrane-bounded organelle;GO:0043234//protein complex	GO:0005198//structural molecule activity;GO:0017111//nucleoside-triphosphatase activity;GO:0032550//purine ribonucleoside binding	GO:0006006//glucose metabolic process;GO:0006970//response to osmotic stress;GO:0006996//organelle organization;GO:0010038//response to metal ion;GO:0043623//cellular protein complex assembly;GO:0044763//single-organism cellular process;GO:0051603//proteolysis involved in cellular protein catabolic process
MSTRG.55376	--	1.23	1.7	0.87	5.35	5.84	4.35	0.87	0.82	0.77	0.82	5.18	1.2667	-2.03191518	0.000390635	0.002253472	-0.627341103	0.631659646	0.980399641	-	-	-	-	-
MSTRG.55385	--	1.27	0.79	0.77	7.25	6.53	5.38	0.45	0.29	0.41	0.3833	6.3867	0.9433	-2.759223603	2.20E-13	4.22E-12	-1.299168192	0.076336818	0.446995625	high mobility group B protein 2 isoform X2 [Eutrema salsugineum]	-	-	-	-
MSTRG.55391	ARR13	0.03	0.01	0	0.09	1.02	0.49	0	0	0.02	0.0067	0.5333	0.0133	-5.321928095	0.000255723	0.001535977	-1	0.723906652	0.980399641	PREDICTED: hornerin-like [Raphanus sativus]	-	GO:0043231//intracellular membrane-bounded organelle	GO:0005488//binding	GO:0000160//phosphorelay signal transduction system;GO:0009735//response to cytokinin;GO:0032870//cellular response to hormone stimulus;GO:0044238//primary metabolic process;GO:0048513//animal organ development;GO:0048638//regulation of developmental growth;GO:0071704//organic substance metabolic process;GO:2000026//regulation of multicellular organismal development
MSTRG.55431	--	1.16	0.27	0.32	3.54	1.79	2.64	0.46	0.36	0.08	0.3	2.6567	0.5833	-2.187224802	0.005820555	0.024573815	-0.959358016	0.470407305	0.967370158	BnaCnng58630D [Brassica napus]	-	-	-	-
MSTRG.55433	--	0.88	0.57	0.61	0.22	0.4	0.17	0.78	0.38	0.77	0.6433	0.2633	0.6867	1.382719779	0.006851346	0.028285334	-0.09404349	0.708579912	0.980399641	At3g49550 [Arabidopsis thaliana]	-	-	-	-
MSTRG.55436	NAC062	2.16	2.73	3.17	7.39	8.52	7.42	2.27	2.14	2.36	2.2567	7.7767	2.6867	-1.533334563	1.82E-05	0.000137216	-0.251624005	0.751412238	0.980399641	NAC transcription factor 62-3.1 [Brassica napus]	-	GO:0016020//membrane;GO:0043231//intracellular membrane-bounded organelle	GO:0001071//nucleic acid binding transcription factor activity;GO:0003824//catalytic activity;GO:0005515//protein binding	GO:0002252//immune effector process;GO:0006355//regulation of transcription, DNA-templated;GO:0006402//mRNA catabolic process;GO:0006486//protein glycosylation;GO:0007165//signal transduction;GO:0009409//response to cold;GO:0010243//response to organonitrogen compound;GO:0042127//regulation of cell proliferation;GO:0044707//single-multicellular organism process;GO:0045087//innate immune response
MSTRG.55527	--	0.65	1.38	1.58	0	0	0	2.46	3.88	2.23	2.8567	0	1.2033	10.23282062	1.42E-05	0.000109214	1.247296367	0.008647762	0.102644498	hypothetical protein F2Q70_00002878 [Brassica cretica]	-	-	-	-
MSTRG.55536	GAD2	24.49	21.24	24.41	0.72	0.22	0.5	36.44	34.78	39.16	36.7933	0.48	23.38	5.606096714	2.79E-41	2.21E-39	0.654169455	1.19E-23	5.85E-21	glutamate decarboxylase 2-like [Brassica rapa]	ko01100//Metabolic pathways;ko01110//Biosynthesis of secondary metabolites;ko00250//Alanine, aspartate and glutamate metabolism;ko00410//beta-Alanine metabolism;ko00650//Butanoate metabolism;ko00430//Taurine and hypotaurine metabolism	GO:0043231//intracellular membrane-bounded organelle;GO:0044444//cytoplasmic part	GO:0005515//protein binding;GO:0016705//oxidoreductase activity, acting on paired donors, with incorporation or reduction of molecular oxygen;GO:0016831//carboxy-lyase activity;GO:0043168//anion binding;GO:0043169//cation binding	GO:0001101//response to acid chemical;GO:0006605//protein targeting;GO:0006873//cellular ion homeostasis;GO:0006970//response to osmotic stress;GO:0009064//glutamine family amino acid metabolic process;GO:0009746//response to hexose;GO:0009891//positive regulation of biosynthetic process;GO:0010038//response to metal ion;GO:0015698//inorganic anion transport;GO:0030001//metal ion transport;GO:003…
MSTRG.55551	--	1.27	0.93	0.63	0	0.07	0.13	1.59	1.11	1.1	1.2667	0.0667	0.9433	3.822730148	4.64E-07	4.53E-06	0.425197365	0.096327087	0.508784497	unnamed protein product [Brassica napus]	-	-	-	-
MSTRG.55572	NPF2.3	2.07	2.42	2.4	0.98	0.55	1.82	1.73	1.71	2.07	1.8367	1.1167	2.2967	1.040342887	4.08E-05	0.00028768	-0.322451664	0.992774953	0.998648747	protein NRT1/ PTR FAMILY 2.3-like isoform X2 [Brassica rapa]	-	GO:0031224//intrinsic component of membrane	-	GO:0015833//peptide transport;GO:0042126//nitrate metabolic process;GO:0045491//xylan metabolic process;GO:0051707//response to other organism
MSTRG.5559	--	0.24	0.11	0.25	0.89	1.17	1.31	0.15	0.17	0.08	0.1333	1.1233	0.2	-2.489714186	0.00326822	0.014894003	-0.584962501	0.830008323	0.980399641	BnaC09g22170D [Brassica napus]	-	-	-	-
MSTRG.55756	--	1.85	1.54	0.96	0.15	0.09	0.18	1.49	1.64	1.81	1.6467	0.14	1.45	3.372554168	8.95E-12	1.49E-10	0.183495641	0.122364127	0.575811494	-	-	-	-	-
MSTRG.55786	CLPR2	0.62	0.78	1.68	6.59	6.65	7.25	1.22	0.92	0.32	0.82	6.83	1.0267	-2.733917728	7.78E-07	7.35E-06	-0.324272035	0.963067558	0.992719162	PREDICTED: ATP-dependent Clp protease proteolytic subunit-related protein 2, chloroplastic [Raphanus sativus]	-	-	-	-
MSTRG.55825	--	0.7	0.83	0.53	0.52	0.88	2.29	0	0	0	0	1.23	0.6867	-0.840976479	0.781477402	0.928519144	-9.423466121	0.000929101	0.01738455	BnaCnng17430D [Brassica napus]	-	-	-	-
MSTRG.5593	--	0.11	0.06	0	1.25	0.93	1.21	0	0	0	0	1.13	0.0567	-4.317678622	1.07E-05	8.40E-05	-5.824428435	0.38819776	0.919509566	BnaA02g35280D [Brassica napus]	-	GO:0043231//intracellular membrane-bounded organelle	-	-
MSTRG.55932	--	0.02	0	0.15	0.5	0.77	0.58	0.04	0.02	0	0.02	0.6167	0.0567	-3.443918619	0.003248438	0.014819399	-1.502500341	0.571104077	0.980399641	Harbinger transposase-derived protein [Arabidopsis suecica]	-	-	-	-
MSTRG.56050	--	12.22	9.6	8.16	25.77	31.99	22.86	5.39	4.61	4.51	4.8367	26.8733	9.9933	-1.4271374	0.000106734	0.000692951	-1.046952864	0.004680986	0.064479282	EMBRYO SURROUNDING FACTOR 1.2 [Arabidopsis lyrata subsp. lyrata] [Arabidopsis lyrata]	-	-	-	-
MSTRG.56076	ICL	0.36	0.02	1.64	0.06	0.02	0	0.66	0.58	1.01	0.75	0.0267	0.6733	4.658211483	3.94E-05	0.000278544	0.155569708	0.73549053	0.980399641	PREDICTED: LOW QUALITY PROTEIN: isocitrate lyase [Brassica oleracea var. oleracea] [Brassica oleracea]	ko01100//Metabolic pathways;ko01110//Biosynthesis of secondary metabolites;ko01200//Carbon metabolism;ko00630//Glyoxylate and dicarboxylate metabolism	GO:0005777//peroxisome	GO:0016833//oxo-acid-lyase activity	GO:0003006//developmental process involved in reproduction;GO:0006101//citrate metabolic process;GO:0044262//cellular carbohydrate metabolic process
MSTRG.56085	ADO2	1.61	1.3	1.58	0.66	0.63	0.71	0.35	0.5	0.69	0.5133	0.6667	1.4967	1.166715445	5.35E-10	7.50E-09	-1.543785094	0.000748965	0.014621166	PREDICTED: adagio protein 2-like [Brassica oleracea var. oleracea] [Brassica oleracea]	-	GO:0016604//nuclear body;GO:0031461//cullin-RING ubiquitin ligase complex;GO:0044444//cytoplasmic part	GO:0003824//catalytic activity;GO:0005488//binding;GO:0009881//photoreceptor activity;GO:0038024//cargo receptor activity	GO:0006625//protein targeting to peroxisome;GO:0006897//endocytosis;GO:0009062//fatty acid catabolic process;GO:0009639//response to red or far red light;GO:0030522//intracellular receptor signaling pathway;GO:0032446//protein modification by small protein conjugation;GO:0043161//proteasome-mediated ubiquitin-dependent protein catabolic process;GO:0048511//rhythmic process;GO:0048571//long-day ph…
MSTRG.56127	KIN10A	0.37	0.09	0.17	2.61	2.65	2.49	0.1	0.06	0.11	0.09	2.5833	0.21	-3.620772577	9.56E-14	1.88E-12	-1.222392421	0.28150136	0.831230718	kinesin-like protein KIN-10A [Brassica rapa]	-	GO:0015630//microtubule cytoskeleton;GO:0044444//cytoplasmic part	GO:0003774//motor activity;GO:0032550//purine ribonucleoside binding	GO:0006342//chromatin silencing;GO:0007017//microtubule-based process;GO:0034968//histone lysine methylation;GO:0048449//floral organ formation;GO:0048580//regulation of post-embryonic development;GO:1902410//mitotic cytokinetic process
MSTRG.56150	--	0.24	0.11	0.11	0.88	1.65	1.59	0.06	0.06	0.06	0.06	1.3733	0.1533	-3.162938571	0.001253821	0.006412096	-1.353636955	0.543110813	0.980399641	BnaC04g24200D [Brassica napus]	-	GO:0009536//plastid;GO:0015935//small ribosomal subunit;GO:0031090//organelle membrane	-	-
MSTRG.56195	GGT1	54.66	55.18	57.51	231.99	220.51	238.61	23.63	38.29	27.77	29.8967	230.37	55.7833	-2.046046803	1.82E-70	2.83E-68	-0.899849505	0.000122006	0.003140332	BnaC03g76380D [Brassica napus]	ko01100//Metabolic pathways;ko00480//Glutathione metabolism;ko00460//Cyanoamino acid metabolism;ko00590//Arachidonic acid metabolism;ko00430//Taurine and hypotaurine metabolism	-	-	-
MSTRG.56196	GGT2	1.58	0.93	1.38	4.15	4.69	3.97	0.46	0.81	0.79	0.6867	4.27	1.2967	-1.719428415	6.61E-05	0.0004483	-0.917125818	0.16525479	0.666270748	PREDICTED: gamma-glutamyltranspeptidase 1-like [Brassica oleracea var. oleracea] [Brassica oleracea]	ko01100//Metabolic pathways;ko00480//Glutathione metabolism;ko00460//Cyanoamino acid metabolism;ko00590//Arachidonic acid metabolism;ko00430//Taurine and hypotaurine metabolism	-	-	-
MSTRG.56215	--	0.28	0.47	0.43	1.34	2.28	5.94	0.21	0.51	0.15	0.29	3.1867	0.3933	-3.018223759	0.001295287	0.006603135	-0.439699554	0.801997805	0.980399641	BnaC05g28590D [Brassica napus]	-	-	-	-
MSTRG.56232	At3g44090	3.94	4.37	3.59	9.35	8.92	10.46	2.48	3.04	2.59	2.7033	9.5767	3.9667	-1.271596419	0.00013167	0.000841244	-0.553187754	0.280121756	0.829887056	PREDICTED: F-box/LRR-repeat protein At1g06630-like [Brassica oleracea var. oleracea] [Brassica oleracea]	-	-	-	-
MSTRG.56295	--	2.76	2.22	2.18	8.02	12.01	11.33	0.44	0.72	1.05	0.7367	10.4533	2.3867	-2.130894067	9.18E-09	1.12E-07	-1.695913218	0.00289201	0.043726662	hypothetical protein HID58_057080 [Brassica napus]	-	-	-	-
MSTRG.5630	NAC089	3.89	3.71	2.81	1.28	1.12	1.04	3.31	3.71	5.04	4.02	1.1467	3.47	1.597489599	9.57E-15	2.03E-13	0.212259839	0.033763433	0.269895975	NAC domain-containing protein 89-like [Brassica rapa]	-	GO:0016020//membrane;GO:0043231//intracellular membrane-bounded organelle	GO:0001071//nucleic acid binding transcription factor activity;GO:0005488//binding	GO:0006355//regulation of transcription, DNA-templated;GO:0006508//proteolysis;GO:0006721//terpenoid metabolic process;GO:0009409//response to cold;GO:0009639//response to red or far red light;GO:0009648//photoperiodism;GO:0009651//response to salt stress;GO:0009756//carbohydrate mediated signaling;GO:0009909//regulation of flower development;GO:0009937//regulation of gibberellic acid mediated si…
MSTRG.56334	--	0.53	0.35	0.41	1.71	2.12	2.54	0.06	0.43	0.07	0.1867	2.1233	0.43	-2.303922307	0.002651308	0.012416514	-1.203872333	0.411819518	0.935201079	BnaC03g61800D [Brassica napus]	-	-	-	-
MSTRG.56344	--	32.85	32.38	26.67	74.63	78.14	62.45	18.5	21.88	23.15	21.1767	71.74	30.6333	-1.227675385	5.57E-07	5.39E-06	-0.532626842	0.107600855	0.540889128	unnamed protein product [Brassica napus]	-	-	-	-
MSTRG.56364	--	11.02	10.21	8.41	20.46	20.41	21.14	7.41	8.52	5.72	7.2167	20.67	9.88	-1.064955442	0.005024826	0.02164642	-0.453178423	0.576489855	0.980399641	hypothetical protein Bca52824_083511 [Brassica carinata]	-	-	-	-
MSTRG.56403	GLC1	1.94	1.73	2.24	5.65	5.78	7.59	2	1.43	1.85	1.76	6.34	1.97	-1.686287211	1.29E-06	1.19E-05	-0.162620201	0.527172374	0.980399641	PREDICTED: glucan endo-1,3-beta-glucosidase-like isoform X1 [Brassica oleracea var. oleracea] [Brassica oleracea]	-	GO:0005911//cell-cell junction;GO:0030312//external encapsulating structure	GO:0004553//hydrolase activity, hydrolyzing O-glycosyl compounds	GO:0010243//response to organonitrogen compound;GO:0044238//primary metabolic process
MSTRG.56454	--	3.25	1.96	1.67	5.97	6.11	7.98	0.65	0.7	0.88	0.7433	6.6867	2.2933	-1.543841136	0.000710507	0.003858416	-1.625364855	8.04E-06	0.000294259	hypothetical protein IGI04_042479 [Brassica rapa subsp. trilocularis] [Brassica rapa]	-	-	-	-
MSTRG.56627	--	1.05	1.12	0.97	2.53	2.1	3.52	0.04	0.15	0.23	0.14	2.7167	1.0467	-1.3760355	0.004847241	0.020977659	-2.902303326	1.26E-07	6.99E-06	BnaC03g54850D [Brassica napus]	-	-	-	-
MSTRG.56652	GIP	2.32	2.31	2.43	0.03	0.04	0.01	5.2	4.86	5.03	5.03	0.0267	2.3533	6.463524373	7.48E-96	1.90E-93	1.095852717	9.69E-44	2.64E-40	Terpene synthase N-terminal domain [Arabidopsis suecica]	-	-	GO:0016787//hydrolase activity	-
MSTRG.56653	BGLU3	2.49	2.22	2.84	0	0.04	0.04	4.87	4.1	4.2	4.39	0.0267	2.5167	6.560332834	1.10E-36	7.19E-35	0.802706796	1.29E-11	1.53E-09	Terpene synthase N-terminal domain [Arabidopsis suecica]	-	-	GO:0016787//hydrolase activity	-
MSTRG.56697	--	9.53	8.62	11.11	3.66	3.31	3.6	14	12.45	15.2	13.8833	3.5233	9.7533	1.468954393	9.70E-35	5.88E-33	0.509386726	4.58E-08	2.79E-06	BnaAnng22330D [Brassica napus]	-	-	-	-
MSTRG.56792	VPS45	5.82	5.85	4.3	17.43	15.52	16.23	2.63	4.02	3.29	3.3133	16.3933	5.3233	-1.622707422	1.02E-10	1.53E-09	-0.684046556	0.116669527	0.56205511	vacuolar protein sorting-associated protein 45 homolog isoform X2 [Brassica napus]	ko04144//Endocytosis	GO:0005774//vacuolar membrane;GO:0031984//organelle subcompartment	GO:0005488//binding;GO:0022892//substrate-specific transporter activity	GO:0006605//protein targeting;GO:0006865//amino acid transport;GO:0015672//monovalent inorganic cation transport;GO:0015748//organophosphate ester transport;GO:0016482//cytoplasmic transport;GO:0043067//regulation of programmed cell death;GO:0048278//vesicle docking;GO:0051049//regulation of transport;GO:0051707//response to other organism;GO:0061024//membrane organization;GO:0070838//divalent me…
MSTRG.56793	--	0.62	1.02	0.63	6.4	4.77	6.84	0.16	0.36	0.41	0.31	6.0033	0.7567	-2.988033979	3.90E-12	6.71E-11	-1.287389676	0.102615405	0.52660112	hypothetical protein F2Q70_00013491 [Brassica cretica]	-	-	-	-
MSTRG.56811	LGALDH	0.79	0.66	0.41	0.3	0.28	0.21	0.53	0.7	0.56	0.5967	0.2633	0.62	1.235378063	0.005741567	0.024285745	-0.055343034	0.634208044	0.980399641	L-galactose dehydrogenase-like [Brassica napus]	ko01100//Metabolic pathways;ko01110//Biosynthesis of secondary metabolites;ko00053//Ascorbate and aldarate metabolism	GO:0044444//cytoplasmic part	GO:0016646//oxidoreductase activity, acting on the CH-NH group of donors, NAD or NADP as acceptor	GO:0019852//L-ascorbic acid metabolic process
MSTRG.56988	LCR25	0	0	0	0.1	2.08	3.27	0	0	0	0	1.8167	0	-10.82707801	0.000771837	0.004156078	0	1	1	defensin-like protein 159 [Brassica napus]	-	-	-	-
MSTRG.56989	LCR25	0	0.22	0	0.9	2.23	1.97	0	0	0	0	1.7	0.0733	-4.534921818	0.004574883	0.019970708	-6.196397213	0.742419751	0.980399641	defensin-like protein 161 [Brassica napus]	-	-	-	-
MSTRG.57004	RDL3	0.36	0.38	0.4	1.31	1.39	1.29	0.25	0.25	0.2	0.2333	1.33	0.38	-1.807354922	0.008525059	0.034059059	-0.703606997	0.571799918	0.980399641	PREDICTED: probable cysteine proteinase At3g43960 [Brassica oleracea var. oleracea] [Brassica oleracea]	-	GO:0031224//intrinsic component of membrane;GO:0044444//cytoplasmic part	GO:0016491//oxidoreductase activity;GO:0070011//peptidase activity, acting on L-amino acid peptides	GO:0000097//sulfur amino acid biosynthetic process;GO:0016129//phytosteroid biosynthetic process;GO:0019538//protein metabolic process;GO:0030001//metal ion transport;GO:0048588//developmental cell growth
MSTRG.57033	KPNB1	0.66	0.53	0.66	2.41	2.61	2.8	0.49	0.48	0.46	0.4767	2.6067	0.6167	-2.079643337	1.60E-07	1.67E-06	-0.371510124	0.913983561	0.98081137	PREDICTED: importin subunit beta-1-like isoform X1 [Brassica oleracea var. oleracea] [Brassica oleracea]	ko03013//Nucleocytoplasmic transport	GO:0044444//cytoplasmic part	-	-
MSTRG.57062	--	1.19	1.14	1.01	0.26	0.25	0.57	1.33	1.25	1.1	1.2267	0.36	1.1133	1.62881679	2.24E-08	2.61E-07	0.139857664	0.072345006	0.432921009	F22C12.1 [Arabidopsis thaliana]	-	-	-	-
MSTRG.57108	--	2.45	2.11	2.32	0.59	0.27	0.42	1.98	2.46	2.25	2.23	0.4267	2.2933	2.426264755	5.78E-09	7.26E-08	-0.040402354	0.444031331	0.953082073	BnaCnng39280D [Brassica napus]	-	-	-	-
MSTRG.57187	SD18	1	1.87	0.8	0.04	0.5	0.39	0.73	0.78	0.77	0.76	0.31	1.2233	1.980477442	0.000281982	0.001677299	-0.686746239	0.465655926	0.964745436	PREDICTED: receptor-like serine/threonine-protein kinase SD1-7 isoform X4 [Raphanus sativus]	-	GO:0016020//membrane	GO:0004672//protein kinase activity;GO:0036094//small molecule binding;GO:0097159//organic cyclic compound binding;GO:1901363//heterocyclic compound binding	GO:0006796//phosphate-containing compound metabolic process;GO:0048544//recognition of pollen
MSTRG.57190	At1g50980	1.17	1.21	1	3.05	3.14	3.05	0.78	1.16	0.78	0.9067	3.08	1.1267	-1.450869605	0.002912748	0.01347023	-0.313416595	0.958998336	0.991750858	FBD domain [Arabidopsis thaliana x Arabidopsis arenosa]	-	GO:0043231//intracellular membrane-bounded organelle	GO:0008079//translation termination factor activity	GO:0043624//cellular protein complex disassembly
MSTRG.57362	DEK1	1.28	1.2	1.69	0.26	0.26	0.36	0.86	1.04	0.94	0.9467	0.2933	1.39	2.244471955	1.23E-14	2.59E-13	-0.554156454	0.450887079	0.958068841	calpain-type cysteine protease DEK1 [Arabidopsis lyrata subsp. lyrata] [Arabidopsis lyrata]	-	GO:0016021//integral component of membrane;GO:0031090//organelle membrane;GO:0043231//intracellular membrane-bounded organelle	GO:0004197//cysteine-type endopeptidase activity	GO:0000904//cell morphogenesis involved in differentiation;GO:0001708//cell fate specification;GO:0006508//proteolysis;GO:0007015//actin filament organization;GO:0007059//chromosome segregation;GO:0008283//cell proliferation;GO:0009790//embryo development;GO:0009933//meristem structural organization;GO:0009955//adaxial/abaxial pattern specification;GO:0009960//endosperm development;GO:0010053//ro…
MSTRG.57367	--	0.93	0.86	2.08	0.07	0	0.12	1.92	1.34	2.24	1.8333	0.0633	1.29	4.348262243	6.26E-09	7.83E-08	0.507098052	0.071544278	0.430058195	hypothetical protein F2Q70_00039729 [Brassica cretica]	-	-	-	-
MSTRG.5740	--	0	0	0	2.28	1.53	2.32	0	0	0	0	2.0433	0	-10.99670886	2.51E-07	2.55E-06	0	1	1	hypothetical protein IGI04_024306 [Brassica rapa subsp. trilocularis] [Brassica rapa]	-	-	-	-
MSTRG.57457	ERS1	2.05	2.41	1.39	6.39	6.83	5.22	1.24	1.71	1.3	1.4167	6.1467	1.95	-1.656330126	3.29E-06	2.83E-05	-0.460973783	0.65172463	0.980399641	BnaC04g51810D [Brassica napus]	ko04075//Plant hormone signal transduction;ko04016//MAPK signaling pathway - plant	GO:0031090//organelle membrane;GO:0031224//intrinsic component of membrane;GO:0043231//intracellular membrane-bounded organelle	GO:0004673//protein histidine kinase activity;GO:0004871//signal transducer activity;GO:0005515//protein binding;GO:0032550//purine ribonucleoside binding;GO:0043169//cation binding;GO:0072328//alkene binding	GO:0001101//response to acid chemical;GO:0006468//protein phosphorylation;GO:0006725//cellular aromatic compound metabolic process;GO:0006950//response to stress;GO:0009617//response to bacterium;GO:0009720//detection of hormone stimulus;GO:0009756//carbohydrate mediated signaling;GO:0010104//regulation of ethylene-activated signaling pathway;GO:0010468//regulation of gene expression;GO:0042743//…
MSTRG.57458	NDT1	4.96	5.33	5.12	1.6	1.32	1.29	4.71	4.29	3.92	4.3067	1.4033	5.1367	1.871974723	1.08E-28	5.13E-27	-0.254260792	0.574298548	0.980399641	BnaC04g51240D [Brassica napus]	-	GO:0042170//plastid membrane;GO:0043234//protein complex	GO:0005488//binding;GO:0016836//hydro-lyase activity;GO:0051184//cofactor transporter activity	GO:0003006//developmental process involved in reproduction;GO:0006101//citrate metabolic process;GO:0006862//nucleotide transport;GO:0006970//response to osmotic stress;GO:0042126//nitrate metabolic process;GO:0043648//dicarboxylic acid metabolic process
MSTRG.57474	bVPE	75.33	70.32	68.63	17.66	12.87	16.65	80.7	82.89	73.9	79.1633	15.7267	71.4267	2.183249877	1.28E-112	4.24E-110	0.148369566	2.39E-10	2.29E-08	vacuolar-processing enzyme beta-isozyme-like [Brassica napus]	-	GO:0000322//storage vacuole	GO:0004175//endopeptidase activity	GO:0007033//vacuole organization;GO:0016485//protein processing
MSTRG.57475	bVPE	6.09	3.93	4.54	0.83	0.26	0.44	5.98	5.03	4.18	5.0633	0.51	4.8533	3.250406798	1.76E-24	6.72E-23	0.061111514	0.087955024	0.484895211	PREDICTED: LOW QUALITY PROTEIN: vacuolar-processing enzyme beta-isozyme-like [Brassica oleracea var. oleracea] [Brassica oleracea]	-	GO:0005773//vacuole	GO:0004175//endopeptidase activity	GO:0009987//cellular process;GO:0016485//protein processing
MSTRG.57485	--	0.97	0.91	2.02	0.3	0.37	0.4	0.56	1.44	1.03	1.01	0.3567	1.3	1.865863327	4.10E-05	0.000288888	-0.36415633	0.91912439	0.982755983	PREDICTED: WD repeat-containing protein 13 [Brassica oleracea var. oleracea] [Brassica oleracea]	-	-	-	-
MSTRG.57486	--	0.12	0	0.22	5.5	25.26	28.9	0.12	0	0.25	0.1233	19.8867	0.1133	-7.455085421	1.59E-11	2.58E-10	0.121990524	0.845684173	0.980399641	pollen coat protein B3 [Brassica rapa]	-	-	-	-
MSTRG.57575	--	0.08	0.06	0.16	1.79	2.72	2.18	0	0	0.08	0.0267	2.23	0.1	-4.478971805	1.01E-06	9.43E-06	-1.906890596	0.438611791	0.949593481	hypothetical protein Bca52824_050136 [Brassica carinata]	-	-	-	-
MSTRG.57591	AAK6	1.64	1.67	1.76	0.56	0.46	0.86	3.47	2.15	3.93	3.1833	0.6267	1.69	1.431253085	2.94E-06	2.54E-05	0.913514986	0.000273884	0.006283059	PREDICTED: adenylate kinase isoenzyme 6 homolog [Brassica oleracea var. oleracea] [Brassica oleracea]	ko01100//Metabolic pathways;ko01110//Biosynthesis of secondary metabolites;ko00230//Purine metabolism;ko03008//Ribosome biogenesis in eukaryotes	GO:0043231//intracellular membrane-bounded organelle	GO:0016776//phosphotransferase activity, phosphate group as acceptor;GO:0017111//nucleoside-triphosphatase activity;GO:0032550//purine ribonucleoside binding	GO:0009117//nucleotide metabolic process;GO:0044707//single-multicellular organism process;GO:0048589//developmental growth
MSTRG.57650	--	0.44	0.15	0.23	4.23	3.24	2.68	0.33	0.93	1.23	0.83	3.3833	0.2733	-3.629712007	6.51E-06	5.33E-05	1.602449927	0.03871162	0.294796997	transmembrane protein [Arabidopsis thaliana]	-	-	-	-
MSTRG.57926	BGLU28	0.33	0.12	0.23	3.9	2.46	4.2	0	0	0.13	0.0433	3.52	0.2267	-3.956931278	1.44E-07	1.52E-06	-2.387023123	0.270085385	0.81894046	BnaAnng30970D, partial [Brassica napus]	ko01100//Metabolic pathways;ko01110//Biosynthesis of secondary metabolites;ko00940//Phenylpropanoid biosynthesis;ko00500//Starch and sucrose metabolism;ko00460//Cyanoamino acid metabolism	GO:0009526//plastid envelope;GO:0042579//microbody	GO:0004721//phosphoprotein phosphatase activity;GO:0005543//phospholipid binding;GO:0015926//glucosidase activity	GO:0006091//generation of precursor metabolites and energy;GO:0006355//regulation of transcription, DNA-templated;GO:0006470//protein dephosphorylation;GO:0006568//tryptophan metabolic process;GO:0006605//protein targeting;GO:0006873//cellular ion homeostasis;GO:0009628//response to abiotic stimulus;GO:0009683//indoleacetic acid metabolic process;GO:0009696//salicylic acid metabolic process;GO:00…
MSTRG.57928	BGLU29	29.14	31.05	26.12	5.22	2.95	3.83	29.77	35.75	25.76	30.4267	4	28.77	2.846493316	2.60E-80	4.92E-78	0.08077107	0.000757207	0.014745684	BnaC04g03760D [Brassica napus]	ko01100//Metabolic pathways;ko01110//Biosynthesis of secondary metabolites;ko00940//Phenylpropanoid biosynthesis;ko00500//Starch and sucrose metabolism;ko00460//Cyanoamino acid metabolism	GO:0005911//cell-cell junction;GO:0009536//plastid;GO:0042579//microbody	GO:0015926//glucosidase activity;GO:0019899//enzyme binding;GO:0046914//transition metal ion binding;GO:0046983//protein dimerization activity	GO:0006355//regulation of transcription, DNA-templated;GO:0006952//defense response;GO:0006970//response to osmotic stress;GO:0006996//organelle organization;GO:0009409//response to cold;GO:0009608//response to symbiont;GO:0009725//response to hormone;GO:0009746//response to hexose;GO:0009827//plant-type cell wall modification;GO:0034285//response to disaccharide;GO:0044767//single-organism devel…
MSTRG.57987	RPS2A	0.92	1.34	0.9	2.54	4.51	3.17	0.12	0.22	0.19	0.1767	3.4067	1.0533	-1.693398733	0.013047113	0.048915988	-2.575860294	0.006218715	0.080019061	40S ribosomal protein S2-4-like [Pyrus ussuriensis x Pyrus communis]	ko03010//Ribosome	GO:0005911//cell-cell junction;GO:0009536//plastid;GO:0015935//small ribosomal subunit;GO:0016020//membrane;GO:0030312//external encapsulating structure	GO:0005198//structural molecule activity	GO:0006221//pyrimidine nucleotide biosynthetic process;GO:0009451//RNA modification;GO:0010467//gene expression
MSTRG.58060	--	2.48	2.46	1.97	6.18	6.12	6.99	1.33	1.41	0.96	1.2333	6.43	2.3033	-1.481095528	7.22E-06	5.85E-05	-0.90116044	0.053035238	0.359360635	BnaA06g15060D [Brassica napus]	-	GO:0043231//intracellular membrane-bounded organelle	-	-
MSTRG.58094	LCR52	3.4	2.23	3.91	7.53	11.24	9.49	2.08	1.99	2.54	2.2033	9.42	3.18	-1.566700294	0.008558861	0.034174494	-0.529338994	0.660209415	0.980399641	PREDICTED: defensin-like protein 122 [Raphanus sativus]	-	-	-	-
MSTRG.58133	--	0.13	0.32	0.08	1.19	1.26	1.45	0.04	0	0.05	0.03	1.3	0.1767	-2.879409859	0.000951238	0.005012252	-2.557995453	0.186915344	0.707490296	BnaC05g36830D [Brassica napus]	-	-	-	-
MSTRG.58227	--	2.95	4.26	4.7	0.18	0.15	0	3.54	4.92	4.45	4.3033	0.11	3.97	5.173563579	5.47E-12	9.25E-11	0.116315587	0.224526746	0.763026217	BnaC02g20670D [Brassica napus]	-	-	-	-
MSTRG.58281	--	0.55	0.32	0.56	1.34	6.06	4.91	1.39	0.68	0.55	0.8733	4.1033	0.4767	-3.10574371	0.000497065	0.002799777	0.873551665	0.137256544	0.609325719	unnamed protein product [Brassica napus]	-	-	-	-
MSTRG.58287	At2g37460	0.94	0.44	0.16	0	0	0	0	0.52	1.24	0.5867	0	0.5133	9.003752135	7.35E-06	5.95E-05	0.192645078	0.617481529	0.980399641	WAT1-related protein At2g37460 [Brassica rapa]	-	GO:0031224//intrinsic component of membrane	GO:0005215//transporter activity	GO:0044763//single-organism cellular process
MSTRG.58337	--	0.32	0.28	0.46	0	0	0	0.3	0.79	0.43	0.5067	0	0.3533	8.464886049	0.007570229	0.030822146	0.520007059	0.427302802	0.942727945	unnamed protein product [Brassica napus]	-	-	-	-
MSTRG.58406	API5	3.36	3.69	3.43	8.09	9.84	7.8	2.12	2.22	1.16	1.8333	8.5767	3.4933	-1.29581274	3.09E-05	0.000223611	-0.930135193	0.018878903	0.182007624	BnaC05g22070D [Brassica napus]	-	-	-	-
MSTRG.58480	--	0.58	0.86	0.7	0.3	0.47	0.4	1.78	1.73	1.83	1.78	0.39	0.7133	0.871102267	0.002762325	0.012870053	1.319228945	4.04E-06	0.000157837	Reverse transcriptase domain [Arabidopsis thaliana x Arabidopsis arenosa]	-	-	-	-
MSTRG.58524	--	1.7	1.91	1.86	0.95	0.61	0.78	2.12	1.88	1.48	1.8267	0.78	1.8233	1.225032303	6.01E-09	7.54E-08	0.00263506	0.233355964	0.776487274	PREDICTED: probable serine/threonine-protein kinase kinX [Brassica oleracea var. oleracea] [Brassica oleracea]	-	-	-	-
MSTRG.58552	--	0.28	0.45	0.24	1.78	1.4	1.25	0.22	0.44	0.23	0.2967	1.4767	0.3233	-2.191250046	0.00501726	0.021618286	-0.124179411	0.802317876	0.980399641	unnamed protein product [Brassica napus]	-	-	-	-
MSTRG.58564	--	6.37	6.11	5.77	2.47	2.02	2.14	5.03	5.61	5.08	5.24	2.21	6.0833	1.460815689	2.22E-18	6.05E-17	-0.215295246	0.584164105	0.980399641	-	-	-	-	-
MSTRG.58565	At3g47300	0.33	0.17	0.36	1.46	2.88	2.95	0.08	0.12	0.08	0.0933	2.43	0.2867	-3.08351025	4.31E-07	4.23E-06	-1.618909833	0.137286733	0.609391354	PREDICTED: LOW QUALITY PROTEIN: selT-like protein [Tarenaya hassleriana]	-	GO:0009536//plastid;GO:0016020//membrane	-	-
MSTRG.58572	RAP2-2	0.91	0.48	0.48	1.61	2.51	2.36	0.4	0.48	0.34	0.4067	2.16	0.6233	-1.792955543	0.003715743	0.016684996	-0.616157122	0.623302903	0.980399641	BnaC07g48430D [Brassica napus]	-	GO:0016020//membrane;GO:0043231//intracellular membrane-bounded organelle	GO:0005488//binding	GO:0001666//response to hypoxia;GO:0010467//gene expression;GO:0034645//cellular macromolecule biosynthetic process;GO:0042221//response to chemical;GO:0044238//primary metabolic process;GO:0044763//single-organism cellular process;GO:0050789//regulation of biological process
MSTRG.58575	--	0.19	0.3	0.21	0.86	2.96	1.1	0.19	0.49	0.06	0.2467	1.64	0.2333	-2.813231488	0.000417098	0.002387177	0.080170349	0.639482034	0.980399641	BnaC07g15710D [Brassica napus]	-	GO:0031301//integral component of organelle membrane;GO:0044434//chloroplast part	GO:0005488//binding	GO:0006351//transcription, DNA-templated;GO:0006950//response to stress;GO:0009314//response to radiation
MSTRG.58582	--	3.6	3.83	3.08	9.18	11.86	9.47	2.44	2.43	1.75	2.2067	10.17	3.5033	-1.537519511	9.67E-05	0.000633181	-0.666859547	0.307391857	0.855214969	-	-	-	-	-
MSTRG.58615	--	1.23	1.01	0.99	0.16	0.27	0.13	0.75	1.5	1.42	1.2233	0.1867	1.0767	2.528035433	0.000139784	0.00088968	0.184245898	0.397950247	0.926731206	hypothetical protein BRARA_F00851 [Brassica rapa]	-	-	-	-
MSTRG.58627	SGT1B	0.86	0.56	0.78	2.36	2.09	2.94	0.14	0.24	0.3	0.2267	2.4633	0.7333	-1.748070841	0.007174037	0.02943427	-1.693896872	0.037856271	0.290576626	BnaCnng42040D [Brassica napus]	ko04626//Plant-pathogen interaction	GO:0031461//cullin-RING ubiquitin ligase complex;GO:0043231//intracellular membrane-bounded organelle;GO:0044444//cytoplasmic part	GO:0005488//binding	GO:0006605//protein targeting;GO:0009617//response to bacterium;GO:0009696//salicylic acid metabolic process;GO:0009733//response to auxin;GO:0009755//hormone-mediated signaling pathway;GO:0009817//defense response to fungus, incompatible interaction;GO:0009863//salicylic acid mediated signaling pathway;GO:0010029//regulation of seed germination;GO:0010243//response to organonitrogen compound;GO:…
MSTRG.58633	GSVIVT00026920001	0.97	0.85	0.37	1.43	0.93	1.03	0.16	0.12	0.03	0.1033	1.13	0.73	-0.630354404	0.971497232	0.988769879	-2.820590749	0.00118607	0.021112314	PREDICTED: probable polygalacturonase [Brassica oleracea var. oleracea] [Brassica oleracea]	-	GO:0030312//external encapsulating structure;GO:0031224//intrinsic component of membrane	GO:0004553//hydrolase activity, hydrolyzing O-glycosyl compounds	GO:0044238//primary metabolic process;GO:0045229//external encapsulating structure organization
MSTRG.58663	--	0.49	0.24	0.19	1.95	2.7	2.2	0.1	0	0.11	0.07	2.2833	0.3067	-2.896398222	5.59E-05	0.000384707	-2.131244533	0.191292318	0.714272334	-	-	-	-	-
MSTRG.58709	--	1.08	1.49	1.11	0.31	0.26	0.25	1.4	1.08	1.29	1.2567	0.2733	1.2267	2.166009951	1.27E-05	9.86E-05	0.034858757	0.456702174	0.961160418	hypothetical protein IGI04_020211, partial [Brassica rapa subsp. trilocularis] [Brassica rapa]	-	-	-	-
MSTRG.58728	--	1.18	0.76	0.8	3.99	3.81	4.43	0.62	0.28	0.92	0.6067	4.0767	0.9133	-2.158176606	1.79E-07	1.85E-06	-0.590237443	0.661255487	0.980399641	electron transfer flavoprotein subunit alpha, mitochondrial [Vitis riparia]	-	-	-	-
MSTRG.58734	--	1.73	2.34	1.12	0.92	0.55	0.65	0.83	1.44	1.14	1.1367	0.7067	1.73	1.291670274	2.58E-06	2.25E-05	-0.605962799	0.484075242	0.971958618	Harbinger transposase-derived protein [Arabidopsis suecica]	-	-	-	-
MSTRG.58779	--	0.15	0.2	0.53	0	0	0.68	1.67	0.82	2.62	1.7033	0.2267	0.2933	0.371968777	0.540336311	0.789252879	2.537747862	0.000223788	0.005274523	BnaAnng04230D [Brassica napus]	-	-	-	-
MSTRG.58794	--	4.6	2.86	2.29	4.01	4.02	9.59	0.44	0.85	0.56	0.6167	5.8733	3.25	-0.8537398	0.523239394	0.774366496	-2.397876948	2.53E-09	1.99E-07	BnaC07g15840D [Brassica napus]	-	-	-	-
MSTRG.58806	--	2.31	5.15	3.37	2.59	4.41	3.88	0.75	1.07	0.96	0.9267	3.6267	3.61	-0.006645314	0.036821186	0.115932475	-1.961876455	4.58E-08	2.79E-06	hypothetical protein DY000_02022243 [Brassica cretica]	-	-	-	-
MSTRG.58819	--	1.52	0.47	0.3	3.4	2.81	5.12	0	0.28	0.11	0.13	3.7767	0.7633	-2.306728358	0.001227604	0.006296516	-2.553801569	0.01834551	0.17810226	hypothetical protein IGI04_042754 [Brassica rapa subsp. trilocularis] [Brassica rapa]	-	-	-	-
MSTRG.58876	At1g75040	0.29	0.31	0.2	0	0	0	1.36	0.55	0.81	0.9067	0	0.2667	8.058893689	0.001421131	0.007171581	1.765534746	0.003689485	0.053318625	pathogenesis-related protein 5 [Brassica rapa]	-	GO:0005623//cell	-	GO:0009814//defense response, incompatible interaction;GO:0031323//regulation of cellular metabolic process;GO:0042221//response to chemical;GO:0044711//single-organism biosynthetic process;GO:0044763//single-organism cellular process;GO:0051716//cellular response to stimulus;GO:0080090//regulation of primary metabolic process;GO:1901576//organic substance biosynthetic process
MSTRG.58901	At5g47720	0.76	0.37	0.6	0.19	0.1	0.25	0.13	0.29	0	0.14	0.18	0.5767	1.679740725	0.011564091	0.044186739	-2.042310805	0.131001223	0.594532451	PREDICTED: probable acetyl-CoA acetyltransferase, cytosolic 2, partial [Camelina sativa]	ko01100//Metabolic pathways;ko01110//Biosynthesis of secondary metabolites;ko01200//Carbon metabolism;ko00620//Pyruvate metabolism;ko00630//Glyoxylate and dicarboxylate metabolism;ko01212//Fatty acid metabolism;ko00380//Tryptophan metabolism;ko00900//Terpenoid backbone biosynthesis;ko00071//Fatty acid degradation;ko00280//Valine, leucine and isoleucine degradation;ko00310//Lysine degradation;ko00…	GO:0016020//membrane;GO:0042579//microbody	GO:0003988//acetyl-CoA C-acyltransferase activity;GO:0043169//cation binding	GO:0000904//cell morphogenesis involved in differentiation;GO:0003006//developmental process involved in reproduction;GO:0006084//acetyl-CoA metabolic process;GO:0016104//triterpenoid biosynthetic process;GO:0016129//phytosteroid biosynthetic process;GO:0044707//single-multicellular organism process
MSTRG.58974	BCAT6	2.25	3.1	2.34	1.37	0.78	1.45	3.58	2.7	3.53	3.27	1.2	2.5633	1.094986692	1.82E-07	1.89E-06	0.351269538	0.007183193	0.089152725	PREDICTED: branched-chain-amino-acid aminotransferase 6-like [Raphanus sativus]	ko01100//Metabolic pathways;ko01110//Biosynthesis of secondary metabolites;ko01230//Biosynthesis of amino acids;ko00270//Cysteine and methionine metabolism;ko01210//2-Oxocarboxylic acid metabolism;ko00280//Valine, leucine and isoleucine degradation;ko00770//Pantothenate and CoA biosynthesis;ko00966//Glucosinolate biosynthesis;ko00290//Valine, leucine and isoleucine biosynthesis	GO:0009532//plastid stroma	GO:0004084//branched-chain-amino-acid transaminase activity	GO:0006549//isoleucine metabolic process;GO:0006551//leucine metabolic process;GO:0006573//valine metabolic process;GO:0006637//acyl-CoA metabolic process;GO:0008652//cellular amino acid biosynthetic process;GO:0009404//toxin metabolic process;GO:0035556//intracellular signal transduction
MSTRG.5898	DGK4	0.05	0.18	0.34	0.13	0.14	0	1.49	0.73	1.08	1.1	0.09	0.19	1.078002512	0.142332312	0.330614145	2.5334322	1.24E-06	5.55E-05	diacylglycerol kinase 4 [Brassica rapa]	ko01100//Metabolic pathways;ko01110//Biosynthesis of secondary metabolites;ko00564//Glycerophospholipid metabolism;ko00561//Glycerolipid metabolism;ko04070//Phosphatidylinositol signaling system	-	-	GO:0009987//cellular process
MSTRG.58982	--	0	0.04	0	1.39	2.21	2.2	0	0	0	0	1.9333	0.0133	-7.17990909	1.30E-06	1.19E-05	-3.736965594	0.903039578	0.980399641	Harbinger transposase-derived protein [Arabidopsis thaliana x Arabidopsis arenosa]	-	-	-	-
MSTRG.58983	ARL8C	6.71	7.02	5.33	12.96	13.08	13.87	5.97	6.57	6.72	6.42	13.3033	6.3533	-1.06620216	0.006961994	0.02868685	0.015059584	0.071038453	0.428081072	ADP-ribosylation factor-like protein 8c [Brassica rapa]	-	GO:0005911//cell-cell junction;GO:0031090//organelle membrane;GO:0043231//intracellular membrane-bounded organelle;GO:0044444//cytoplasmic part	GO:0032550//purine ribonucleoside binding	GO:0002252//immune effector process;GO:0009690//cytokinin metabolic process;GO:0022402//cell cycle process;GO:0035556//intracellular signal transduction
MSTRG.59066	--	0.67	1.26	1.02	4.82	4.19	3.99	0.95	0.8	1.01	0.92	4.3333	0.9833	-2.139724764	0.000607965	0.00335713	-0.096046687	0.710868005	0.980399641	-	-	-	-	-
MSTRG.59067	CS26	58.57	51.82	50.43	20.68	20.05	24.52	55.59	45.85	53.58	51.6733	21.75	53.6067	1.301397028	3.75E-72	6.05E-70	-0.052992477	0.007539008	0.092624445	probable S-sulfocysteine synthase, chloroplastic [Brassica napus]	ko01100//Metabolic pathways;ko00270//Cysteine and methionine metabolism	GO:0031978//plastid thylakoid lumen	GO:0016835//carbon-oxygen lyase activity	GO:0000097//sulfur amino acid biosynthetic process;GO:0006563//L-serine metabolic process;GO:0009642//response to light intensity;GO:0042743//hydrogen peroxide metabolic process;GO:2000377//regulation of reactive oxygen species metabolic process
MSTRG.59134	--	0.58	0.38	0.52	2.06	1.78	2.13	0.21	0.29	0.12	0.2067	1.99	0.4933	-2.012133756	1.96E-07	2.02E-06	-1.255257055	0.053330083	0.360186324	BnaCnng11820D [Brassica napus]	-	-	-	-
MSTRG.59209	UGT71C2	0.6	0.66	0.68	0.11	0.04	0.19	0.79	0.8	0.72	0.77	0.1133	0.6467	2.512450001	2.12E-06	1.88E-05	0.251836199	0.166880978	0.669382196	PREDICTED: UDP-glycosyltransferase 71C2-like [Brassica oleracea var. oleracea] [Brassica oleracea]	-	-	-	-
MSTRG.59383	ESF1.3	0	0	0.17	0.63	6.17	12.2	0	0	0	0	6.3333	0.0567	-6.804320862	7.57E-06	6.11E-05	-5.824428435	0.733976684	0.980399641	pollen coat protein B23 [Brassica oleracea]	-	-	-	-
MSTRG.59459	--	0.79	0.4	0.44	1.65	1.6	1.8	0.19	0.11	0.19	0.1633	1.6833	0.5433	-1.631411423	0.00136672	0.006925871	-1.73401831	0.008665247	0.102805771	BnaA09g22890D [Brassica napus]	-	-	-	-
MSTRG.59464	--	0	0	0	0.43	0.78	0.79	0	0	0	0	0.6667	0	-9.380821784	5.66E-07	5.47E-06	0	1	1	PLATZ transcription factor family protein [Arabidopsis thaliana]	-	-	-	GO:0009408//response to heat
MSTRG.59475	scw1	0.08	0	0.07	0	0	0.04	0.61	0.27	0.34	0.4067	0.0133	0.05	1.906890596	0.285682004	0.53925149	3.023846742	0.000580855	0.011820573	BnaC01g32160D [Brassica napus]	-	-	GO:0097159//organic cyclic compound binding	-
MSTRG.59487	--	0.09	0	0	4.02	2.48	4.18	0	0	0	0	3.56	0.03	-6.89077093	1.75E-06	1.57E-05	-4.906890596	0.903039578	0.980399641	PREDICTED: S-type anion channel SLAH4-like [Brassica oleracea var. oleracea] [Brassica oleracea]	-	-	-	-
MSTRG.59500	--	4.46	4.15	3.54	8.47	9.36	9.73	1.43	2.69	1.57	1.8967	9.1867	4.05	-1.181619574	0.004645834	0.020233915	-1.094455756	0.027184963	0.233918172	Aspartic peptidase domain superfamily [Arabidopsis suecica]	-	-	-	-
MSTRG.5951	CKX3	3.59	3.58	4.62	14.17	13.69	14.88	1.17	1.39	1.3	1.2867	14.2467	3.93	-1.85802319	1.94E-13	3.73E-12	-1.610890966	3.97E-07	2.01E-05	cytokinin dehydrogenase 3 [Brassica rapa]	ko00908//Zeatin biosynthesis	GO:0043231//intracellular membrane-bounded organelle	GO:0000166//nucleotide binding;GO:0016616//oxidoreductase activity, acting on the CH-OH group of donors, NAD or NADP as acceptor;GO:0016641//oxidoreductase activity, acting on the CH-NH2 group of donors, oxygen as acceptor;GO:0016645//oxidoreductase activity, acting on the CH-NH group of donors	GO:0009690//cytokinin metabolic process;GO:0044710//single-organism metabolic process
MSTRG.59513	--	0	0	0	1.18	1.53	1.48	0	0	0	0	1.3967	0	-10.44777203	1.12E-06	1.03E-05	0	1	1	replication protein A 70 kDa DNA-binding subunit C-like [Brassica napus]	ko03420//Nucleotide excision repair;ko03440//Homologous recombination;ko03030//DNA replication;ko03430//Mismatch repair	-	-	-
MSTRG.59590	--	0.88	0.97	0.95	9.23	9.87	8.98	0.18	0.19	0.49	0.2867	9.36	0.9333	-3.326044203	1.61E-49	1.58E-47	-1.703018262	0.004861347	0.06631715	Harbinger transposase-derived protein [Arabidopsis suecica]	-	-	-	-
MSTRG.5960	FZR2	0	0	0	0.38	0.54	0.53	0	0	0	0	0.4833	0	-8.916874684	0.002842701	0.013198896	0	1	1	PREDICTED: protein FIZZY-RELATED 1-like [Lupinus angustifolius]	ko04075//Plant hormone signal transduction	-	-	-
MSTRG.59666	--	1.3	1.25	0.68	4.23	4.02	3.59	0.2	0.46	0.2	0.2867	3.9467	1.0767	-1.874063011	4.21E-06	3.55E-05	-1.9091256	0.001548811	0.026333084	BnaA09g22890D [Brassica napus]	-	-	-	-
MSTRG.59680	--	0.97	0.96	0.68	3.98	5.83	2.18	0.88	0.25	0	0.3767	3.9967	0.87	-2.199709947	0.010355355	0.040179535	-1.207727034	0.464243209	0.963924332	-	-	-	-	-
MSTRG.59714	--	0.77	1.27	0.7	2.66	2.62	2.98	0.32	0.46	0.25	0.3433	2.7533	0.9133	-1.591965888	0.004009907	0.017823872	-1.411531556	0.042991208	0.315594085	hypothetical protein F2Q68_00025508 [Brassica cretica]	-	-	-	-
MSTRG.59715	--	15.55	19.99	16.68	33.34	29.57	33.11	5.14	6.81	4.42	5.4567	32.0067	17.4067	-0.878732478	0.063413987	0.178754804	-1.673548136	4.46E-13	6.49E-11	hypothetical protein DY000_02031378 [Brassica cretica]	-	-	-	-
MSTRG.59734	NUF2	2.13	2.16	2	5.65	5.03	5.18	1.11	1.27	1.16	1.18	5.2867	2.0967	-1.334260849	0.000128211	0.000821215	-0.829310657	0.05834296	0.381016076	BnaCnng37720D [Brassica napus]	-	GO:0016020//membrane	-	-
MSTRG.59774	--	2.33	2.46	2.18	5.77	5.02	5.01	1.36	1.28	0.9	1.18	5.2667	2.3233	-1.180693997	0.010237522	0.039800518	-0.977409296	0.044519227	0.322126224	hypothetical protein F2Q70_00020065 [Brassica cretica]	-	-	-	-
MSTRG.59808	--	0.07	0.09	0.09	4.28	3.6	3.73	0	0	0	0	3.87	0.0833	-5.537296067	9.48E-17	2.33E-15	-6.380821784	0.143911138	0.622589778	BnaC03g66020D [Brassica napus]	ko03420//Nucleotide excision repair;ko03440//Homologous recombination;ko03030//DNA replication;ko03430//Mismatch repair	-	-	-
MSTRG.59830	PPX1	0.14	0.16	0.03	0.8	0.75	0.7	0.1	0.19	0.04	0.11	0.75	0.11	-2.769387072	0.002911504	0.013466154	0	0.802352128	0.980399641	Homeobox-like domain superfamily [Arabidopsis suecica]	-	GO:0005737//cytoplasm;GO:0043231//intracellular membrane-bounded organelle	GO:0016787//hydrolase activity	GO:0009404//toxin metabolic process
MSTRG.59845	HMA5	0.36	0.62	0.35	2.17	1.63	1.76	0.16	0.23	0.19	0.1933	1.8533	0.4433	-2.063658637	1.25E-05	9.69E-05	-1.19730144	0.096469811	0.509164455	PREDICTED: probable copper-transporting ATPase HMA5 [Brassica oleracea var. oleracea] [Brassica oleracea]	ko04016//MAPK signaling pathway - plant	GO:0031224//intrinsic component of membrane	GO:0032550//purine ribonucleoside binding;GO:0043682//copper-transporting ATPase activity;GO:0046914//transition metal ion binding	GO:0010038//response to metal ion;GO:0035434//copper ion transmembrane transport;GO:0061687//detoxification of inorganic compound
MSTRG.59868	--	0.76	1.27	0.72	3.37	2.9	3.12	0.76	0.67	1	0.81	3.13	0.9167	-1.771693539	0.00017288	0.001080089	-0.178475305	0.714281144	0.980399641	SNF2 domain protein [Arabidopsis thaliana]	-	-	-	-
MSTRG.59904	--	0	0	0	2.77	2.03	2.83	0	0	0	0	2.5433	0	-11.31250484	1.07E-08	1.30E-07	0	1	1	BnaC01g41410D [Brassica napus]	-	-	-	-
MSTRG.59948	--	0.98	1.25	0.9	3.53	3.67	3.59	0.36	0.29	0.16	0.27	3.5967	1.0433	-1.785460303	0.000950497	0.005008665	-1.950168844	0.019058764	0.183250398	nucleolin 1-like [Brassica napus]	-	-	-	-
MSTRG.60026	--	1.33	0.93	1	12.83	21.8	16.58	0.09	0.3	1.06	0.4833	17.07	1.0867	-3.97348169	2.67E-19	7.67E-18	-1.168819064	0.360564334	0.902223384	BnaC05g26530D [Brassica napus]	-	-	-	-
MSTRG.60036	--	11.42	9.35	6.57	3.97	2.55	3.25	2.49	2.75	0.99	2.0767	3.2567	9.1133	1.484582776	3.54E-19	1.01E-17	-2.133709175	7.96E-09	5.63E-07	Harbinger transposase-derived protein [Arabidopsis suecica]	-	-	-	-
MSTRG.60037	STY13	0.27	0	0.25	1.13	1.07	1.73	0	0	0.25	0.0833	1.31	0.1733	-2.917945784	0.005067039	0.021806904	-1.056583528	0.675860121	0.980399641	PREDICTED: serine/threonine-protein kinase HT1 isoform X1 [Brassica oleracea var. oleracea] [Brassica oleracea]	-	GO:0016020//membrane;GO:0043231//intracellular membrane-bounded organelle	GO:0004713//protein tyrosine kinase activity;GO:0032550//purine ribonucleoside binding	GO:0006468//protein phosphorylation;GO:0010646//regulation of cell communication
MSTRG.6006	LECRKS7	0.08	0.11	0.02	1.49	1.04	0.47	0.05	0.03	0.03	0.0367	1	0.07	-3.836501268	4.60E-05	0.0003216	-0.932885804	0.638945422	0.980399641	PREDICTED: probable L-type lectin-domain containing receptor kinase S.7 [Brassica oleracea var. oleracea] [Brassica oleracea]	-	-	GO:0004672//protein kinase activity;GO:0036094//small molecule binding;GO:0097159//organic cyclic compound binding;GO:1901363//heterocyclic compound binding	GO:0006464//cellular protein modification process;GO:0016310//phosphorylation
MSTRG.60104	--	0.36	0.32	0.39	2.32	1.93	1.4	0.09	0.39	0.18	0.22	1.8833	0.3567	-2.400640071	0.011689418	0.044596268	-0.697072867	0.730105722	0.980399641	chaperone protein ClpB3, chloroplastic [Brassica napus]	-	-	-	-
MSTRG.60108	CPK17	3.65	4.29	2.64	1.68	1.47	1.65	1.75	1.92	1.2	1.6233	1.6	3.5267	1.140233317	2.51E-06	2.19E-05	-1.11934595	0.037035461	0.286247898	calcium-dependent protein kinase 17 isoform X3 [Eutrema salsugineum]	ko04626//Plant-pathogen interaction	-	-	-
MSTRG.60114	SSL9	0.08	0	0.17	0.04	0.03	0.06	3.49	1.43	3.24	2.72	0.0433	0.0833	0.943416472	0.333952176	0.598532508	5.028569152	4.52E-14	7.78E-12	protein STRICTOSIDINE SYNTHASE-LIKE 9 [Brassica rapa]	-	GO:0009536//plastid	GO:0016843//amine-lyase activity	GO:0009411//response to UV;GO:0009812//flavonoid metabolic process;GO:0009820//alkaloid metabolic process;GO:0016129//phytosteroid biosynthetic process;GO:0034285//response to disaccharide
MSTRG.60143	--	0.8	0.65	0.72	1.91	2.43	1.96	0.26	0.33	0.56	0.3833	2.1	0.7233	-1.537656786	0.007274932	0.029769281	-0.916061182	0.273414769	0.823119419	probable pectinesterase/pectinesterase inhibitor 64 [Eutrema salsugineum]	-	-	-	-
MSTRG.60240	XI-A	0.55	0.15	0.39	0.06	0.03	0.13	0.2	0.26	0.35	0.27	0.0733	0.3633	2.308752706	0.002571437	0.012090589	-0.428334322	0.879895248	0.980399641	PREDICTED: LOW QUALITY PROTEIN: myosin-10-like [Raphanus sativus]	-	-	-	-
MSTRG.60257	At1g29670	0.65	1.01	0.33	0	0.12	0.22	0.14	0.61	0.38	0.3767	0.1133	0.6633	2.549161779	0.00050377	0.002832579	-0.816445658	0.499483341	0.977593688	GDSL esterase/lipase At1g29660 [Eutrema salsugineum]	-	GO:0005576//extracellular region;GO:0030312//external encapsulating structure;GO:0031976//plastid thylakoid	GO:0016788//hydrolase activity, acting on ester bonds	GO:0006631//fatty acid metabolic process;GO:0006970//response to osmotic stress;GO:0007275//multicellular organism development;GO:0009414//response to water deprivation;GO:0009746//response to hexose;GO:0009814//defense response, incompatible interaction;GO:0042044//fluid transport
MSTRG.60266	At1g09600	0.52	0.49	0.54	2.28	2.15	1.74	0.23	0.36	0.37	0.32	2.0567	0.5167	-1.993002274	0.000219602	0.00133943	-0.691161905	0.539621103	0.980399641	probable serine/threonine-protein kinase At1g09600 [Brassica napus]	ko03010//Ribosome	-	GO:0004672//protein kinase activity	GO:0044763//single-organism cellular process
MSTRG.60279	VHA-B1	0.05	0.26	0.09	0.79	0.93	0.8	0.07	0.06	0.18	0.1033	0.84	0.1333	-2.655351829	0.002045631	0.00991231	-0.367731785	0.996822462	0.999105461	V-type proton ATPase subunit B 2 isoform X1 [Brassica rapa]	ko01100//Metabolic pathways;ko00190//Oxidative phosphorylation;ko04145//Phagosome	GO:0033176//proton-transporting V-type ATPase complex	GO:0022857//transmembrane transporter activity	GO:0009150//purine ribonucleotide metabolic process;GO:0015988//energy coupled proton transmembrane transport, against electrochemical gradient
MSTRG.60391	--	0	0	0	0.66	0.85	1.12	0.08	0.17	0	0.0833	0.8767	0	-9.775884583	0.000543474	0.003035048	6.380821784	0.395993636	0.925041068	hypothetical protein DY000_02033045 [Brassica cretica]	-	-	-	-
MSTRG.60418	DOF1.3	10.41	10.39	10.71	3.82	1.99	4.65	19.39	19.74	20.88	20.0033	3.4867	10.5033	1.590926903	3.17E-17	8.01E-16	0.929393176	9.07E-34	1.31E-30	BnaC05g50970D [Brassica napus]	-	GO:0043231//intracellular membrane-bounded organelle	GO:0001071//nucleic acid binding transcription factor activity;GO:0003676//nucleic acid binding	GO:0010468//regulation of gene expression;GO:0048506//regulation of timing of meristematic phase transition
MSTRG.60434	--	1.44	1.35	1.36	3.14	3.11	3.09	1.45	1.38	0.98	1.27	3.1133	1.3833	-1.170311213	0.003872784	0.017293494	-0.123320339	0.421880252	0.939593798	Zinc finger SWIM-type [Arabidopsis thaliana x Arabidopsis arenosa]	-	-	GO:0046914//transition metal ion binding	-
MSTRG.60489	--	1.15	2.78	0.8	0.35	0.23	0.62	0.72	1.22	0.92	0.9533	0.4	1.5767	1.978805778	0.000443899	0.002526377	-0.725825037	0.546059309	0.980399641	hypothetical protein DY000_02021270 [Brassica cretica]	-	-	-	-
MSTRG.60513	--	0.59	0.34	0.38	3.89	4.5	4.33	0	0.24	0.07	0.1033	4.24	0.4367	-3.279459954	2.05E-19	5.94E-18	-2.079226691	0.049079452	0.34277204	NYN domain limkain-b1-type [Arabidopsis thaliana x Arabidopsis arenosa]	-	GO:0043231//intracellular membrane-bounded organelle	-	GO:0008152//metabolic process
MSTRG.60535	SC35	5.59	4.39	5.11	1.01	0.89	1.11	3.56	4.31	4.58	4.15	1.0033	5.03	2.325757414	6.66E-33	3.74E-31	-0.277447064	0.798114975	0.980399641	BnaC04g29470D [Brassica napus]	-	GO:0043231//intracellular membrane-bounded organelle;GO:0044444//cytoplasmic part	GO:0004866//endopeptidase inhibitor activity;GO:0046914//transition metal ion binding	GO:0006970//response to osmotic stress
MSTRG.60550	--	8.07	3.82	3.75	0.35	0.23	0.51	13.48	4.02	5.96	7.82	0.3633	5.2133	3.842840473	3.46E-16	8.14E-15	0.584962501	0.037628056	0.289498932	-	-	-	-	-
MSTRG.60610	--	0.6	0.54	0.75	2.69	4.13	3.29	0.57	0.52	0.35	0.48	3.37	0.63	-2.419324858	0.000658223	0.003603059	-0.392317423	0.881093362	0.980399641	At5g36923 [Arabidopsis thaliana]	-	-	-	-
MSTRG.60632	--	0.22	0.29	0.38	0	0	0	1.03	0.87	1.09	0.9967	0	0.2967	8.212699025	0.000521201	0.002920957	1.748268243	0.001224823	0.021689895	PREDICTED: glucose and ribitol dehydrogenase homolog 1-like [Raphanus sativus]	-	-	-	-
MSTRG.60643	At1g65710	0.3	0.23	0.08	6.69	8.15	6.99	0.07	0.02	0.02	0.0367	7.2767	0.2033	-5.161359077	3.86E-45	3.37E-43	-2.471305719	0.047347647	0.335744806	BnaCnng25400D [Brassica napus]	-	-	-	-
MSTRG.60712	At5g38590	0.16	0.07	0.27	2.02	2.12	1.78	0	0.03	0.03	0.02	1.9733	0.1667	-3.565597176	7.05E-09	8.77E-08	-3.058893689	0.055210539	0.36849074	FBD-associated F-box protein At5g38590-like [Brassica napus]	-	-	-	-
MSTRG.60737	--	0.18	0.32	0.16	1.08	1.37	1.06	0.04	0.1	0.09	0.0767	1.17	0.22	-2.410933101	0.004821551	0.020883804	-1.520832163	0.33054889	0.874730708	PREDICTED: protein PXR1-like [Raphanus sativus]	-	-	-	-
MSTRG.60810	--	2.99	2.75	1.85	7.11	7.25	8.58	1.53	2.45	2.2	2.06	7.6467	2.53	-1.595693601	0.000305896	0.001805527	-0.296493048	0.922649486	0.983104889	hypothetical protein HID58_043276 [Brassica napus]	-	-	-	-
MSTRG.60923	--	2.28	2.72	3.43	1.32	1.32	0.93	3.61	2.34	3.68	3.21	1.19	2.81	1.239608557	1.07E-09	1.45E-08	0.192003167	0.064553243	0.403989007	unnamed protein product [Brassica napus]	-	-	-	-
MSTRG.60960	--	0.07	0.18	0.29	1.24	1.85	1.24	0.13	0.29	0.07	0.1633	1.4433	0.18	-3.003335713	0.003255702	0.014847489	-0.140177658	0.92350817	0.983104889	BnaC04g32820D [Brassica napus]	-	-	-	-
MSTRG.61098	--	0	0	0	0	0.03	0.03	0.68	0.22	0.55	0.4833	0.02	0	-4.321928095	0.815818318	0.938018871	8.916874684	0.00028406	0.006471463	BnaA04g29260D [Brassica napus]	-	-	-	-
MSTRG.61116	--	0	0	0.05	0.02	0.04	0.08	0.5	0.06	0.32	0.2933	0.0467	0.0167	-1.485426827	0.665840205	0.861835155	4.137503524	0.001834853	0.030308349	hypothetical protein F2Q68_00027297 [Brassica cretica]	-	-	-	-
MSTRG.61182	--	0	0.06	0	6.68	5.15	3.81	0	0	0	0	5.2133	0.02	-8.026062297	3.86E-08	4.38E-07	-4.321928095	1	1	protein ALP1-like [Brassica napus]	-	-	-	-
MSTRG.61215	REM15.15	6.62	6.99	6.68	3.34	1.73	2.6	4.71	6.66	5.37	5.58	2.5567	6.7633	1.403470382	7.97E-18	2.09E-16	-0.277469337	0.768003874	0.980399641	B3 domain-containing protein REM14 [Brassica napus]	-	GO:0009526//plastid envelope	-	GO:0010467//gene expression
MSTRG.61228	AtMg00310	2.59	2.89	3.08	0.12	0.07	0.13	3.56	3.73	3.22	3.5033	0.1067	2.8533	4.741466986	1.08E-78	1.97E-76	0.296079968	1.33E-05	0.000457904	Reverse transcriptase zinc-binding domain [Arabidopsis thaliana x Arabidopsis arenosa]	-	-	-	-
MSTRG.61251	At4g17486	1.73	2.58	1.92	4.69	5.38	5.04	1.67	1.36	1.23	1.42	5.0367	2.0767	-1.278199592	0.00684602	0.028268934	-0.548378733	0.50086972	0.977593688	PREDICTED: deSI-like protein At4g17486 [Brassica oleracea var. oleracea] [Brassica oleracea]	-	GO:0016020//membrane;GO:0044424//intracellular part	-	GO:0044248//cellular catabolic process;GO:0046942//carboxylic acid transport
MSTRG.61267	--	19.64	18.74	18	2.96	2.34	3.25	17.4	21.36	19.44	19.4	2.85	18.7933	2.721187153	8.18E-114	2.77E-111	0.045835675	0.000447926	0.009488846	BnaCnng43480D [Brassica napus]	-	-	-	-
MSTRG.61308	--	0.89	0.41	1.02	0.48	0.26	0.25	0.39	0.53	0.2	0.3733	0.33	0.7733	1.228624375	0.011880407	0.045209295	-1.050626073	0.353336627	0.896776419	BnaC01g29850D [Brassica napus]	-	-	-	-
MSTRG.61342	--	0.26	0.45	0.81	1.57	2.06	1.85	0.15	0.56	0.2	0.3033	1.8267	0.5067	-1.85010457	0.007704183	0.031294332	-0.740132873	0.539029814	0.980399641	Integrase catalytic core [Arabidopsis thaliana x Arabidopsis arenosa]	-	-	-	-
MSTRG.61376	--	5.16	5.75	6.46	26.2	23.56	25.15	2.36	3	2.98	2.78	24.97	5.79	-2.108560568	6.48E-28	2.97E-26	-1.058478465	0.000132323	0.003356745	Harbinger transposase-derived protein [Arabidopsis suecica]	-	-	-	-
MSTRG.61390	--	0.38	0.62	0.43	1.8	2.36	2.32	0.28	0.47	0.27	0.34	2.16	0.4767	-2.179978666	4.90E-05	0.000340503	-0.487445995	0.755003536	0.980399641	PREDICTED: chromosome transmission fidelity protein 18 homolog [Camelina sativa]	-	-	GO:0016787//hydrolase activity	-
MSTRG.61410	SPH5	18.06	10.62	10.84	119.21	166.47	121.62	1.58	2.89	3.37	2.6133	135.7667	13.1733	-3.365436962	7.70E-40	5.78E-38	-2.333657387	4.62E-14	7.93E-12	Harbinger transposase-derived protein [Arabidopsis suecica]	-	-	-	-
MSTRG.61461	--	1.34	2.11	0.39	0	0.4	0	0.08	0	0.2	0.0933	0.1333	1.28	3.263034406	0.071219456	0.195865224	-3.777607579	2.49E-05	0.000788861	BnaAnng10430D [Brassica napus]	ko03420//Nucleotide excision repair;ko03440//Homologous recombination;ko03030//DNA replication;ko03430//Mismatch repair	-	-	-
MSTRG.61492	--	7.08	6.11	9.21	1.5	1.7	2.13	8.65	6.25	7.37	7.4233	1.7767	7.4667	2.071291294	4.52E-19	1.28E-17	-0.008397174	0.202863726	0.732186102	hypothetical protein DY000_02022875 [Brassica cretica]	-	-	-	-
MSTRG.6156	OPT8	0.13	0.08	0.19	0.78	1.94	1.68	0.27	0.27	0.14	0.2267	1.4667	0.1333	-3.459431619	3.28E-07	3.28E-06	0.765534746	0.126961645	0.585971895	oligopeptide transporter 8 [Brassica rapa]	-	GO:0031224//intrinsic component of membrane	GO:0015197//peptide transporter activity	GO:0003006//developmental process involved in reproduction;GO:0008104//protein localization;GO:0015833//peptide transport;GO:0044763//single-organism cellular process
MSTRG.61560	PBL10	3.37	2.72	2.85	1.24	1.11	1.19	2.12	2.3	2.15	2.19	1.18	2.98	1.336525471	2.63E-16	6.27E-15	-0.444381461	0.624338503	0.980399641	probable serine/threonine-protein kinase PBL10 [Brassica rapa]	-	GO:0009536//plastid;GO:0016020//membrane	GO:0004713//protein tyrosine kinase activity;GO:0032550//purine ribonucleoside binding	GO:0006468//protein phosphorylation;GO:0009620//response to fungus;GO:0009625//response to insect
MSTRG.61571	TY3B-G	2.52	2.85	3.29	4.25	3.73	4.47	1.13	1.73	1.34	1.4	4.15	2.8867	-0.523706812	0.494214894	0.757178656	-1.043977697	0.000579144	0.011791819	Pentatricopeptide repeat [Arabidopsis thaliana x Arabidopsis arenosa]	-	-	-	-
MSTRG.61597	At2g29320	1.31	1.54	1.49	0.06	0	0.11	0.52	0.55	0.68	0.5833	0.0567	1.4467	4.674088391	1.04E-14	2.20E-13	-1.310340121	0.012151018	0.131718435	tropinone reductase homolog At2g29310 isoform X1 [Brassica rapa]	ko01100//Metabolic pathways;ko01110//Biosynthesis of secondary metabolites;ko00960//Tropane, piperidine and pyridine alkaloid biosynthesis	-	GO:0003824//catalytic activity	GO:0000041//transition metal ion transport;GO:0001101//response to acid chemical;GO:0005982//starch metabolic process;GO:0005984//disaccharide metabolic process;GO:0006739//NADP metabolic process;GO:0009267//cellular response to starvation;GO:0009628//response to abiotic stimulus;GO:0009893//positive regulation of metabolic process;GO:0010038//response to metal ion;GO:0015698//inorganic anion tra…
MSTRG.6163	PBE2	1.78	1.42	1.58	0.93	0.44	0.41	1.39	0.85	1.69	1.31	0.5933	1.5933	1.425133377	6.37E-06	5.22E-05	-0.282481306	0.886935793	0.980399641	PREDICTED: proteasome subunit beta type-5-B-like [Raphanus sativus]	ko03050//Proteasome	GO:0043231//intracellular membrane-bounded organelle;GO:0043234//protein complex	GO:0004175//endopeptidase activity	GO:0010038//response to metal ion;GO:0019941//modification-dependent protein catabolic process
MSTRG.61718	--	0.93	0.68	0.76	2.64	3.32	2.61	0.49	0.6	0.1	0.3967	2.8567	0.79	-1.854408145	0.001890802	0.009244649	-0.993925486	0.360878109	0.902617366	hypothetical protein HID58_062652, partial [Brassica napus]	-	-	-	-
MSTRG.61762	GSTT2	0.36	0.48	0.59	2.9	3.01	3.81	0.28	0.06	0.19	0.1767	3.24	0.4767	-2.764941167	6.59E-16	1.52E-14	-1.431950882	0.055421793	0.369145811	Harbinger transposase-derived protein [Arabidopsis suecica]	-	-	-	-
MSTRG.61811	--	1.53	1.3	1.35	4.02	4.61	4.21	1.01	0.6	0.97	0.86	4.28	1.3933	-1.619070355	1.20E-06	1.10E-05	-0.696131877	0.283896622	0.832313195	Zinc finger CCHC-type superfamily [Arabidopsis thaliana x Arabidopsis arenosa]	-	-	-	-
MSTRG.61855	DOR	1.12	1.15	1.11	2.89	2.64	2.48	0.72	0.54	0.6	0.62	2.67	1.1267	-1.244778996	0.005016002	0.021613979	-0.861720625	0.096704371	0.509665661	PREDICTED: F-box protein DOR-like [Brassica oleracea var. oleracea] [Brassica oleracea]	-	-	GO:0005488//binding	GO:0009414//response to water deprivation;GO:0009787//regulation of abscisic acid-activated signaling pathway
MSTRG.61917	--	2.09	1.87	1.55	0.51	0.43	0.5	2.09	2.7	2.4	2.3967	0.48	1.8367	1.935983507	4.97E-24	1.84E-22	0.383939452	0.000352343	0.007765607	80A08_13 [Brassica rapa subsp. pekinensis] [Brassica rapa]	-	-	-	-
MSTRG.61924	RLP23	1	1.67	0.97	3.15	3.75	4.84	0.29	0.32	0.97	0.5267	3.9133	1.2133	-1.689422053	0.005074038	0.021831404	-1.204013892	0.188612802	0.709730231	BnaA04g17130D [Brassica napus]	-	-	-	-
MSTRG.61957	SPH11	0	0	0	2.42	2.04	1.64	0	0	0	0	2.0333	0	-10.98963103	1.60E-07	1.67E-06	0	1	1	BnaC04g43640D [Brassica napus]	-	-	-	-
MSTRG.61958	SPH11	1.23	1.79	0.61	53.64	58.98	43.08	0	0.09	0	0.03	51.9	1.21	-5.422655586	2.20E-58	2.65E-56	-5.333900737	0.000778127	0.015097338	BnaC04g43640D [Brassica napus]	-	-	-	-
MSTRG.61960	SPH11	39.83	44.52	30.64	182.19	122.43	150.64	2.3	4.75	3.81	3.62	151.7533	38.33	-1.985182303	2.03E-15	4.52E-14	-3.404412396	1.21E-39	2.46E-36	BnaC04g43640D [Brassica napus]	-	-	-	-
MSTRG.61961	SPH11	5.73	6.19	4.44	27.54	23.02	26.79	0.15	0.5	0.32	0.3233	25.7833	5.4533	-2.241228543	3.30E-16	7.79E-15	-4.076044191	1.08E-11	1.29E-09	BnaC04g43640D [Brassica napus]	-	-	-	-
MSTRG.61981	NFD4	1.11	1.19	1.47	3.4	2.72	3.79	0.45	0.45	0.49	0.4633	3.3033	1.2567	-1.394320534	0.004252107	0.018727068	-1.439479641	0.003630359	0.052656504	protein NUCLEAR FUSION DEFECTIVE 4 [Brassica rapa]	-	-	-	-
MSTRG.62008	--	2.82	3.55	3.5	7.03	8.65	8.49	3.51	2.6	3.94	3.35	8.0567	3.29	-1.292095483	0.000204684	0.001257253	0.026073512	0.107551238	0.540807705	BnaC04g44140D [Brassica napus]	-	-	-	-
MSTRG.6207	At1g56553	0	0	0	0.62	1.54	6.26	0	0	0	0	2.8067	0	-11.45464202	9.27E-05	0.000609303	0	1	1	BnaA03g12590D, partial [Brassica napus]	-	-	-	-
MSTRG.62086	--	3.23	1.58	1.53	18.74	16.2	22.64	0.22	0.09	0.43	0.2467	19.1933	2.1133	-3.183013043	9.46E-22	3.13E-20	-3.098885665	2.82E-06	0.000114725	Neprosin activation peptide, partial [Arabidopsis suecica]	-	-	-	-
MSTRG.62108	--	1.17	0.62	0.68	0.05	0.06	0.11	0.85	0.62	0.55	0.6733	0.0733	0.8233	3.488935613	2.36E-07	2.40E-06	-0.290155749	0.913689715	0.98081137	PREDICTED: NAC domain-containing protein 69-like [Brassica oleracea var. oleracea] [Brassica oleracea]	-	-	-	-
MSTRG.62222	--	0.59	0.46	0.84	0.27	0.17	0.22	0.35	0.24	0.3	0.2967	0.22	0.63	1.517848305	0.011554359	0.044151574	-1.086508993	0.382044337	0.918019186	unnamed protein product [Brassica napus]	-	-	-	-
MSTRG.62239	--	0.88	0.94	1.61	0	0	0	5.33	1.97	4.87	4.0567	0	1.1433	10.15903036	6.56E-07	6.27E-06	1.827048687	3.65E-05	0.00110271	Expressed protein [Arabidopsis thaliana]	-	GO:0016020//membrane	-	-
MSTRG.62295	JAL23	0.05	0	0.07	0.98	0.85	0.72	0.08	0.03	0	0.0367	0.85	0.04	-4.409390936	1.20E-05	9.32E-05	-0.125530882	0.962095667	0.99240461	PREDICTED: jacalin-related lectin 22-like [Brassica oleracea var. oleracea] [Brassica oleracea]	-	GO:0005911//cell-cell junction;GO:0009536//plastid	GO:0005488//binding	GO:0006950//response to stress
MSTRG.62304	--	3.25	2.25	0.61	0.06	0.32	0	0.94	0.6	0.14	0.56	0.1267	2.0367	4.007101056	2.38E-06	2.09E-05	-1.862711147	0.050216992	0.347663455	ORF-c [Brassica rapa]	-	-	-	-
MSTRG.62359	At3g50280	10.48	8.8	10.47	1.31	0.98	1.3	23.13	22.53	21.61	22.4233	1.1967	9.9167	3.050833919	1.34E-69	2.04E-67	1.17707359	8.35E-34	1.22E-30	PREDICTED: uncharacterized acetyltransferase At3g50280-like [Brassica oleracea var. oleracea] [Brassica oleracea]	-	-	GO:0016747//transferase activity, transferring acyl groups other than amino-acyl groups	GO:0009628//response to abiotic stimulus
MSTRG.62386	At2g40290	0.18	0.02	0.03	0.72	0.67	0.87	0	0.03	0	0.01	0.7533	0.0767	-3.296617006	0.000629531	0.003461884	-2.938599455	0.213935235	0.748716547	eukaryotic translation initiation factor 2 subunit alpha homolog isoform X2 [Brassica rapa]	ko04141//Protein processing in endoplasmic reticulum;ko03013//Nucleocytoplasmic transport	GO:0043234//protein complex	GO:0008135//translation factor activity, RNA binding	GO:0006412//translation
MSTRG.6241	EXO70A1	1.04	0.76	0.29	1.88	4.46	2.58	0.63	0.4	0.38	0.47	2.9733	0.6967	-2.093540768	0.005365289	0.022899372	-0.56780778	0.734443896	0.980399641	exocyst complex component EXO70A1 isoform X1 [Brassica rapa]	-	-	-	GO:0016192//vesicle-mediated transport
MSTRG.62634	--	11.1	11.12	10.4	0.64	0.45	0.43	12.74	12.23	11.66	12.21	0.5067	10.8733	4.423613553	2.77E-61	3.52E-59	0.167268919	0.00104171	0.018969438	-	-	-	-	-
MSTRG.62661	--	3	1.56	2.38	5.98	14.22	10.37	2.09	0.85	2.04	1.66	10.19	2.3133	-2.139108984	0.000282242	0.001678605	-0.478789921	0.801231676	0.980399641	BnaC07g13270D [Brassica napus]	-	-	-	-
MSTRG.62662	At1g15757	36.82	29.51	35.48	75.04	143.33	98.65	35.42	27.82	35.59	32.9433	105.6733	33.9367	-1.638694586	6.75E-06	5.50E-05	-0.042858327	0.082314867	0.466808835	Molecular chaperone Hsp40/DnaJ family protein [Arabidopsis thaliana]	-	-	-	-
MSTRG.62664	--	14.23	11.12	16.5	65.61	114.98	64.71	13	10.85	8.91	10.92	81.7667	13.95	-2.551247706	1.89E-14	3.92E-13	-0.353292266	0.916317806	0.981797709	Molecular chaperone Hsp40/DnaJ family protein [Arabidopsis thaliana]	-	-	-	-
MSTRG.62667	At1g15757	0.13	0.11	0.22	1.65	5.08	3.77	0	0	0	0	3.5	0.1533	-4.512611656	9.55E-05	0.000625914	-7.26052755	0.42549798	0.941565935	Molecular chaperone Hsp40/DnaJ family protein [Arabidopsis thaliana]	-	-	-	-
MSTRG.62683	ATTI7	2.28	1.94	1.62	5.73	11.8	6.9	0.51	0.41	0.67	0.53	8.1433	1.9467	-2.064613589	0.000380981	0.002202955	-1.876941604	0.014524898	0.150423945	BnaC04g48990D [Brassica napus]	-	-	-	GO:0006950//response to stress;GO:0009620//response to fungus;GO:0044262//cellular carbohydrate metabolic process;GO:0044723//single-organism carbohydrate metabolic process;GO:0044763//single-organism cellular process
MSTRG.62720	--	0.21	0.24	0.03	4.48	4.9	4.16	0.09	0.03	0.03	0.05	4.5133	0.16	-4.818049523	7.43E-20	2.21E-18	-1.678071905	0.322783799	0.868568954	unnamed protein product [Brassica napus]	-	-	-	-
MSTRG.62846	ABCB4	1.19	1.05	1.2	4.68	3.26	3.53	0.89	0.75	0.73	0.79	3.8233	1.1467	-1.737384921	6.52E-08	7.18E-07	-0.537521506	0.399209728	0.927289789	PREDICTED: ABC transporter B family member 4-like [Brassica oleracea var. oleracea] [Brassica oleracea]	ko02010//ABC transporters	GO:0031224//intrinsic component of membrane	GO:0032550//purine ribonucleoside binding;GO:0042626//ATPase activity, coupled to transmembrane movement of substances	GO:0044763//single-organism cellular process;GO:0044765//single-organism transport
MSTRG.62894	SEC14	0.44	0.42	0.58	1.4	2.37	1.45	0.42	0.53	0.59	0.5133	1.74	0.48	-1.857980995	0.008122198	0.032728154	0.096861539	0.446591934	0.954783794	phosphatidylinositol transfer protein 3 [Brassica rapa]	-	GO:0043231//intracellular membrane-bounded organelle	-	GO:0000097//sulfur amino acid biosynthetic process;GO:0051234//establishment of localization
MSTRG.6290	--	0.49	0.82	0.16	0	0.05	0.09	0.23	0.33	0.12	0.2267	0.0467	0.49	3.392317423	0.002436873	0.011532532	-1.112209504	0.442343596	0.951949699	-	-	-	-	-
MSTRG.62993	HFR1	0.12	0.11	0.16	0.96	0.54	0.63	0	0	0.03	0.01	0.71	0.13	-2.449307401	0.008510711	0.034006616	-3.700439718	0.070995014	0.427882484	BnaC05g01110D [Brassica napus]	-	GO:0043231//intracellular membrane-bounded organelle;GO:0044444//cytoplasmic part	GO:0000989//transcription factor activity, transcription factor binding;GO:0001071//nucleic acid binding transcription factor activity;GO:0003676//nucleic acid binding;GO:0005515//protein binding	GO:0006779//porphyrin-containing compound biosynthetic process;GO:0007602//phototransduction;GO:0009630//gravitropism;GO:0009755//hormone-mediated signaling pathway;GO:0010017//red or far-red light signaling pathway;GO:0010029//regulation of seed germination;GO:0010099//regulation of photomorphogenesis;GO:0010467//gene expression;GO:0030522//intracellular receptor signaling pathway;GO:0044710//si…
MSTRG.63105	CRU4	4187.37	3637.62	4131.99	10.94	13.82	13.01	9057.72	8188.62	8062.8	8436.38	12.59	3985.66	8.306396552	0	0	1.081805435	1.76E-53	9.97E-50	cruciferin cru4 subunit, partial [Brassica napus]	-	GO:0005783//endoplasmic reticulum	-	GO:0009409//response to cold;GO:0009639//response to red or far red light;GO:0009685//gibberellin metabolic process;GO:0009737//response to abscisic acid;GO:0009756//carbohydrate mediated signaling;GO:0009793//embryo development ending in seed dormancy;GO:0032446//protein modification by small protein conjugation;GO:0048507//meristem development;GO:0048580//regulation of post-embryonic developmen…
MSTRG.63106	CRU4	25.65	23.31	26.69	0.49	0.48	0.05	62.64	54.96	46.73	54.7767	0.34	25.2167	6.212699025	5.46E-25	2.14E-23	1.119183894	2.43E-26	1.64E-23	cruciferin cru4 subunit, partial [Brassica napus]	-	GO:0005783//endoplasmic reticulum	-	GO:0009409//response to cold;GO:0009639//response to red or far red light;GO:0009685//gibberellin metabolic process;GO:0009737//response to abscisic acid;GO:0009756//carbohydrate mediated signaling;GO:0009793//embryo development ending in seed dormancy;GO:0032446//protein modification by small protein conjugation;GO:0048507//meristem development;GO:0048580//regulation of post-embryonic developmen…
MSTRG.63285	--	0	0.21	0	1.82	8.29	3.5	0	0	0	0	4.5367	0.07	-6.018133929	2.42E-05	0.000178258	-6.129283017	0.742419751	0.980399641	BnaCnng15630D [Brassica napus]	-	-	-	-
MSTRG.63299	CALS1	3.03	3.05	2.58	5.1	6.02	6.25	2.03	2.44	2.03	2.1667	5.79	2.8867	-1.004158824	0.006118477	0.025656572	-0.413927307	0.594672867	0.980399641	PREDICTED: callose synthase 1 [Brassica oleracea var. oleracea] [Brassica oleracea]	-	GO:0005911//cell-cell junction;GO:0031224//intrinsic component of membrane;GO:0044444//cytoplasmic part;GO:0044459//plasma membrane part	GO:0035251//UDP-glucosyltransferase activity	GO:0003006//developmental process involved in reproduction;GO:0006074//(1->3)-beta-D-glucan metabolic process;GO:0009555//pollen development;GO:0018205//peptidyl-lysine modification;GO:0022604//regulation of cell morphogenesis;GO:0042743//hydrogen peroxide metabolic process;GO:0052386//cell wall thickening;GO:0061024//membrane organization
MSTRG.63337	--	11.03	11.51	13.02	23.73	23.91	27.67	4.8	6.46	6.76	6.0067	25.1033	11.8533	-1.082586121	0.000356061	0.002072342	-0.980656313	3.00E-05	0.000926522	Harbinger transposase-derived protein [Arabidopsis suecica]	-	-	-	-
MSTRG.63352	At1g06250	0	0	0	0.29	0.24	0.51	0	0	0	0	0.3467	0	-8.437405312	0.002129403	0.010267615	0	1	1	phospholipase A1-IIalpha [Brassica rapa]	-	GO:0009536//plastid	-	GO:0006629//lipid metabolic process
MSTRG.63427	CDC6B	2.57	2.86	2.49	0.83	0.95	1.12	1.61	1.67	0.94	1.4067	0.9667	2.64	1.44944753	7.40E-18	1.95E-16	-0.908257431	0.035359387	0.278240219	BnaC05g05060D [Brassica napus]	-	GO:0043231//intracellular membrane-bounded organelle	GO:0036094//small molecule binding;GO:0097159//organic cyclic compound binding;GO:1901363//heterocyclic compound binding	GO:0006260//DNA replication;GO:0007049//cell cycle
MSTRG.63460	--	20.95	19.77	16.85	7.7	4.22	5.3	18.28	21.01	10.8	16.6967	5.74	19.19	1.74123207	1.93E-21	6.28E-20	-0.200794601	0.580610276	0.980399641	metallothionein-like protein [Brassica napus]	-	-	GO:0046914//transition metal ion binding	GO:0001101//response to acid chemical;GO:0010038//response to metal ion;GO:0015698//inorganic anion transport
MSTRG.6377	--	27.88	24.77	26.87	48.17	60.65	92.83	24.17	31.06	28.26	27.83	67.2167	26.5067	-1.342463744	0.000842848	0.004497821	0.070285652	0.001324564	0.023150469	BnaC08g11110D [Brassica napus]	-	GO:0009536//plastid	-	-
MSTRG.63789	--	1.3	0.64	1.79	3.94	5.38	4.53	3.76	1.77	0.95	2.16	4.6167	1.2433	-1.892638441	0.00110471	0.005734839	0.796818183	0.03540647	0.278493374	coiled-coil domain-containing protein 18 isoform X2 [Brassica rapa]	-	-	GO:0016740//transferase activity	GO:0006970//response to osmotic stress
MSTRG.63803	--	0.14	0.05	0.06	1.55	1.12	0.45	0	0	0.2	0.0667	1.04	0.0833	-3.641546029	5.71E-05	0.000392008	-0.321928095	0.994524774	0.998970805	hydroxyproline-rich glycoprotein family protein [Arabidopsis thaliana]	-	-	-	-
MSTRG.63892	--	0.05	0	0	0.59	0.82	0.75	0	0	0	0	0.72	0.0167	-5.432959407	0.001131228	0.005852861	-4.058893689	0.903039578	0.980399641	MULE transposase domain [Arabidopsis suecica]	-	-	-	-
MSTRG.63900	At3g56120	0.05	0.05	0	0.82	0.8	0.85	0	0	0	0	0.8233	0.0333	-4.626439137	0.001311057	0.006674162	-5.058893689	0.727804415	0.980399641	tRNA (guanine(37)-N1)-methyltransferase 1 isoform X2 [Herrania umbratica]	-	GO:0044429//mitochondrial part	GO:0009019//tRNA (guanine-N1-)-methyltransferase activity	GO:0001510//RNA methylation;GO:0003006//developmental process involved in reproduction;GO:0006399//tRNA metabolic process;GO:0006464//cellular protein modification process;GO:0048580//regulation of post-embryonic development
MSTRG.64013	PNSL2	0.46	0.47	0.29	1.38	1.94	1.68	0.03	0.35	0.13	0.17	1.6667	0.4067	-2.035046947	0.001044825	0.005450718	-1.258311996	0.289750332	0.838315718	photosynthetic NDH subunit of lumenal location 2, chloroplastic-like [Brassica napus]	ko01100//Metabolic pathways;ko00195//Photosynthesis	GO:0009521//photosystem;GO:0031976//plastid thylakoid;GO:0044434//chloroplast part	-	GO:0044237//cellular metabolic process
MSTRG.64051	--	1.4	2.5	1.22	6.71	7.94	8.13	0.51	1.1	1.15	0.92	7.5933	1.7067	-2.153552032	4.57E-05	0.000319702	-0.891475543	0.370280624	0.908434464	hypothetical protein F2Q68_00022922 [Brassica cretica]	-	-	-	-
MSTRG.64072	NPF8.3	0.58	0.69	0.49	5.3	3.73	4.14	0.15	0.1	0.15	0.1333	4.39	0.5867	-2.903608012	4.48E-16	1.05E-14	-2.137503524	0.002028216	0.032931769	protein NRT1/ PTR FAMILY 8.3 [Brassica rapa]	-	-	-	-
MSTRG.64079	NHX8	0.02	0.03	0.2	0.06	0.04	0.01	0.49	0.15	0.7	0.4467	0.0367	0.0833	1.184424571	0.183899957	0.397485209	2.422233001	0.001688887	0.028263143	PREDICTED: sodium/hydrogen exchanger 8 [Brassica oleracea var. oleracea] [Brassica oleracea]	-	GO:0031224//intrinsic component of membrane	GO:0005451//monovalent cation:proton antiporter activity;GO:0046873//metal ion transmembrane transporter activity	GO:0010351//lithium ion transport;GO:0015992//proton transport;GO:0044763//single-organism cellular process
MSTRG.64080	--	24.73	20.89	23.18	4.04	3.72	3.78	36.78	25.97	36.87	33.2067	3.8467	22.9333	2.575765341	9.90E-77	1.76E-74	0.534026846	3.11E-07	1.61E-05	-	-	-	-	-
MSTRG.64114	BGLU19	6.55	5.89	6.69	0.07	0.02	0	15.91	12.65	16.07	14.8767	0.03	6.3767	7.731696157	2.25E-39	1.66E-37	1.222176933	1.52E-23	7.31E-21	LOW QUALITY PROTEIN: beta-glucosidase 19-like [Brassica rapa]	ko01100//Metabolic pathways;ko01110//Biosynthesis of secondary metabolites;ko00940//Phenylpropanoid biosynthesis;ko00500//Starch and sucrose metabolism;ko00460//Cyanoamino acid metabolism	GO:0005911//cell-cell junction;GO:0009526//plastid envelope;GO:0042579//microbody;GO:0044432//endoplasmic reticulum part	GO:0005543//phospholipid binding;GO:0008422//beta-glucosidase activity;GO:0016791//phosphatase activity;GO:0019899//enzyme binding;GO:0046914//transition metal ion binding;GO:0046983//protein dimerization activity	GO:0000003//reproduction;GO:0006091//generation of precursor metabolites and energy;GO:0006470//protein dephosphorylation;GO:0006568//tryptophan metabolic process;GO:0006605//protein targeting;GO:0006714//sesquiterpenoid metabolic process;GO:0006873//cellular ion homeostasis;GO:0006996//organelle organization;GO:0009267//cellular response to starvation;GO:0009409//response to cold;GO:0009608//res…
MSTRG.64196	--	0	0	0	1.9	1.27	1.25	0	0	0	0	1.4733	0	-10.52486815	2.52E-08	2.92E-07	0	1	1	BnaC02g24110D [Brassica napus]	ko03420//Nucleotide excision repair;ko03440//Homologous recombination;ko03030//DNA replication;ko03430//Mismatch repair	-	-	-
MSTRG.64292	ABI5	0.7	0.76	1.36	0.4	0.6	0.66	2.23	1.13	2.51	1.9567	0.5533	0.94	0.764511921	0.0029712	0.013703468	1.057665341	0.000914508	0.017191189	PREDICTED: protein ABSCISIC ACID-INSENSITIVE 5 [Brassica oleracea var. oleracea] [Brassica oleracea]	ko04075//Plant hormone signal transduction	-	GO:0003677//DNA binding	GO:0003006//developmental process involved in reproduction;GO:0006355//regulation of transcription, DNA-templated;GO:0009628//response to abiotic stimulus;GO:0009755//hormone-mediated signaling pathway;GO:0048580//regulation of post-embryonic development;GO:0048731//system development;GO:0071229//cellular response to acid chemical;GO:0071396//cellular response to lipid;GO:1901701//cellular respon…
MSTRG.64344	NRAMP6	39.59	37.8	40.46	14.96	15.16	14.14	38.61	41.21	39.59	39.8033	14.7533	39.2833	1.412876402	1.62E-101	4.54E-99	0.018971902	3.99E-05	0.001189068	PREDICTED: LOW QUALITY PROTEIN: metal transporter Nramp6 [Brassica oleracea var. oleracea] [Brassica oleracea]	-	-	-	GO:0051234//establishment of localization
MSTRG.64362	OFP5	0.27	0.86	0.26	2.3	3.18	1.85	0.09	0.53	0.12	0.2467	2.4433	0.4633	-2.398728315	0.001035626	0.005409485	-0.909487707	0.498688144	0.977593688	transcription repressor OFP5-like [Brassica rapa]	-	-	-	-
MSTRG.64383	--	2.29	2.12	2.46	12.78	14.59	11.3	0.1	0.57	0.51	0.3933	12.89	2.29	-2.49283276	6.60E-16	1.52E-14	-2.541523239	0.00010053	0.002657569	BnaC09g43340D [Brassica napus]	-	-	-	-
MSTRG.64424	RFNR2	0.54	0.97	0.48	3.04	3.8	3.32	0.16	0.54	0.47	0.39	3.3867	0.6633	-2.352060066	1.04E-05	8.19E-05	-0.766259901	0.511557256	0.980399641	ferredoxin--NADP reductase, root isozyme 2, chloroplastic [Brassica napus]	ko01100//Metabolic pathways;ko00195//Photosynthesis	GO:0009536//plastid	GO:0016731//oxidoreductase activity, acting on iron-sulfur proteins as donors, NAD or NADP as acceptor;GO:0046914//transition metal ion binding	GO:0044237//cellular metabolic process;GO:0044710//single-organism metabolic process
MSTRG.64441	--	1.46	0.49	0.4	1.64	2.25	3.6	0.06	0.03	0.03	0.04	2.4967	0.7833	-1.672304962	0.02443402	0.082670149	-4.291554446	6.55E-08	3.85E-06	BnaC07g15840D [Brassica napus]	-	-	-	-
MSTRG.64444	--	7.42	2.34	2.22	2.86	3.35	9.32	0.28	0.42	0.37	0.3567	5.1767	3.9933	-0.374429922	0.826234568	0.941747209	-3.484945206	3.55E-08	2.22E-06	BnaC07g15840D [Brassica napus]	-	-	-	-
MSTRG.64445	--	6.94	2.45	1.77	6.8	7.13	11.82	0.5	1.12	0.21	0.61	8.5833	3.72	-1.206235405	0.242035721	0.482149607	-2.608421474	0.002456669	0.038315894	BnaC07g15850D [Brassica napus]	-	-	-	-
MSTRG.64446	--	1.67	1.98	1.91	4.02	3.13	4.49	0.43	0.37	0.34	0.38	3.88	1.8533	-1.06593427	0.101602727	0.256930005	-2.286051059	3.64E-06	0.000144556	hypothetical protein IGI04_030636 [Brassica rapa subsp. trilocularis] [Brassica rapa]	-	-	-	-
MSTRG.64447	--	1.75	1.47	1.26	2.66	2.24	2.51	0.17	0.22	0.32	0.2367	2.47	1.4933	-0.72597481	0.595625486	0.834107313	-2.657607803	1.28E-12	1.75E-10	hypothetical protein IGI04_042490 [Brassica rapa subsp. trilocularis] [Brassica rapa]	-	-	-	-
MSTRG.64469	--	0.31	0.32	0.45	3.47	3.73	3.95	0.07	0.06	0.11	0.08	3.7167	0.36	-3.367940493	1.54E-16	3.75E-15	-2.169925001	0.023257166	0.2102552	Harbinger transposase-derived protein [Arabidopsis thaliana x Arabidopsis arenosa]	-	-	-	-
MSTRG.64503	--	8.76	5.28	3.43	15.29	14.73	26.44	0.49	1.47	1.02	0.9933	18.82	5.8233	-1.692349521	0.000901063	0.004776272	-2.551495372	7.19E-08	4.20E-06	BnaC07g15840D [Brassica napus]	-	-	-	-
MSTRG.64526	--	1.99	1.67	2.1	0.27	0.56	0.23	4.07	3.14	3.98	3.73	0.3533	1.92	2.442004547	9.12E-14	1.80E-12	0.95806932	4.11E-08	2.52E-06	At1g17830 [Arabidopsis thaliana]	-	GO:0043231//intracellular membrane-bounded organelle	-	-
MSTRG.64571	RPL12C	0.58	0.57	0.44	1.9	1.68	1.78	0.28	0.39	0.56	0.41	1.7867	0.53	-1.753206235	0.000487511	0.002750599	-0.37036845	0.950131472	0.99000859	BnaCnng59070D [Brassica napus]	ko03010//Ribosome	GO:0015934//large ribosomal subunit;GO:0043231//intracellular membrane-bounded organelle	GO:0005488//binding	-
MSTRG.64674	--	3.94	2.06	3.64	17.96	31.48	27.6	0	0.25	0.58	0.2767	25.68	3.2133	-2.998502652	2.03E-12	3.59E-11	-3.537849905	0.000127733	0.003260171	transmembrane protein [Arabidopsis thaliana]	-	-	-	-
MSTRG.64730	--	0.68	0.71	0.75	2.44	2.82	2.9	0.31	0.47	0.3	0.36	2.72	0.7133	-1.930958356	2.53E-05	0.00018615	-0.986579484	0.20031207	0.728813598	BnaC06g03170D [Brassica napus]	-	-	-	-
MSTRG.64737	--	0.09	0.2	0.16	0.75	1.38	1.14	0	0.15	0.05	0.0667	1.09	0.15	-2.861293729	0.002304023	0.010999065	-1.169925001	0.532331421	0.980399641	BnaC02g03500D [Brassica napus]	-	-	-	-
MSTRG.64797	--	0.52	0.75	1.39	0.07	0.1	0.06	0.25	0.14	0.1	0.1633	0.0767	0.8867	3.531720479	6.25E-09	7.82E-08	-2.440572591	0.001789228	0.029691125	Harbinger transposase-derived protein [Arabidopsis suecica]	-	-	-	-
MSTRG.64838	--	0.58	0	1.86	19.41	21.95	14.04	3.1	0.32	1.72	1.7133	18.4667	0.8133	-4.504932923	0.006105853	0.025613667	1.074887212	0.408277941	0.932334684	PREDICTED: L-type lectin-domain containing receptor kinase I.7-like [Brassica oleracea var. oleracea] [Brassica oleracea]	-	-	-	-
MSTRG.64841	--	0.56	0.82	0.51	1.76	2.27	1.69	0.06	0.44	0.2	0.2333	1.9067	0.63	-1.597628913	0.003374358	0.015328368	-1.432959407	0.080047891	0.459252356	WASH complex subunit 2-like [Brassica napus]	ko04144//Endocytosis	GO:0043231//intracellular membrane-bounded organelle	-	-
MSTRG.64872	--	0.86	0.73	0.83	0.24	0.16	0.22	0.29	0.6	0.61	0.5	0.2067	0.8067	1.964666927	2.41E-05	0.000177819	-0.690044547	0.518535793	0.980399641	PREDICTED: titin homolog [Raphanus sativus]	-	-	-	-
MSTRG.64883	--	0.03	0.09	0.04	0.49	0.52	0.54	0.1	0	0.05	0.05	0.5167	0.0533	-3.276124405	0.001420093	0.007167645	-0.093109404	0.879557558	0.980399641	BnaCnng72230D [Brassica napus]	-	-	-	-
MSTRG.64935	--	78.61	66.77	65.87	16.05	13.84	16.13	64.92	67.14	69.04	67.0333	15.34	70.4167	2.198618453	3.07E-134	1.36E-131	-0.07103826	0.005128714	0.069102917	-	-	-	-	-
MSTRG.64936	--	10.95	6.91	9.03	1.8	1.12	3.47	5.11	5.91	10.1	7.04	2.13	8.9633	2.073181919	4.05E-13	7.59E-12	-0.348459921	0.962277345	0.99240461	-	-	-	-	-
MSTRG.64948	--	0.1	0.04	0.08	6.1	7.42	9.12	0	0	0	0	7.5467	0.0733	-6.685226624	1.24E-17	3.22E-16	-6.196397213	0.319963539	0.866706776	protein ALP1-like isoform X1 [Brassica rapa]	-	-	-	-
MSTRG.64993	At1g23500	0.24	0.67	0.74	0.09	0.07	0.1	0.9	0.45	0.52	0.6233	0.0867	0.55	2.665882496	0.000413071	0.002367374	0.180572246	0.455436069	0.960958631	PREDICTED: GDSL esterase/lipase At1g23500 [Raphanus sativus]	-	-	GO:0016788//hydrolase activity, acting on ester bonds	-
MSTRG.65065	--	0.34	0	0.4	2.62	8.45	5.89	0	0	0	0	5.6533	0.2467	-4.518467089	2.88E-06	2.50E-05	-7.94641896	0.254668033	0.801669909	BnaC05g18950D [Brassica napus]	-	-	-	-
MSTRG.65072	GAMMA-ADR	0	0.2	0.18	0	0	0	0	0.11	0	0.0367	0	0.1267	6.984893108	0.00959085	0.037654419	-1.788495895	0.435860584	0.948182414	PREDICTED: AP-1 complex subunit gamma-1 isoform X1 [Brassica oleracea var. oleracea] [Brassica oleracea]	-	GO:0030131//clathrin adaptor complex;GO:0030662//coated vesicle membrane	GO:0005515//protein binding;GO:0022892//substrate-specific transporter activity	GO:0015031//protein transport
MSTRG.65112	TTM2	1.04	0.9	1.36	0.39	0.44	0.43	1.25	1.47	1.7	1.4733	0.42	1.1	1.389042291	3.03E-06	2.62E-05	0.421580345	0.035958504	0.281098233	Phosphoribulokinase / Uridine kinase family [Arabidopsis thaliana]	ko01100//Metabolic pathways;ko00240//Pyrimidine metabolism	-	GO:0016772//transferase activity, transferring phosphorus-containing groups	GO:0009220//pyrimidine ribonucleotide biosynthetic process;GO:0046132//pyrimidine ribonucleoside biosynthetic process
MSTRG.65129	--	23.86	28.54	25.45	48.84	47.72	51.2	5.18	7.76	6.01	6.3167	49.2533	25.95	-0.924486827	0.025000216	0.08427863	-2.038499191	3.09E-19	1.00E-16	hypothetical protein F2Q69_00050623 [Brassica cretica]	-	-	-	-
MSTRG.65132	--	7.95	7.55	6.65	17.32	15.45	16.39	5.73	5.52	5.57	5.6067	16.3867	7.3833	-1.150178217	0.000154896	0.000976713	-0.397128993	0.736091985	0.980399641	BnaA06g16620D [Brassica napus]	-	-	-	-
MSTRG.65188	--	0.33	0.89	0.82	1.84	3.49	3.2	0.06	0.21	0.2	0.1567	2.8433	0.68	-2.063976589	0.009232518	0.036445357	-2.11783649	0.073959836	0.438345865	BnaC09g43340D [Brassica napus]	-	-	-	-
MSTRG.65223	At5g27750	0.9	0.7	0.65	5.3	4.45	4.4	0.3	0.5	0.55	0.45	4.7167	0.75	-2.652805147	5.34E-15	1.16E-13	-0.736965594	0.375758482	0.912042536	PREDICTED: FBD-associated F-box protein At5g27750-like [Brassica oleracea var. oleracea] [Brassica oleracea]	-	-	-	GO:0000338//protein deneddylation;GO:0006355//regulation of transcription, DNA-templated;GO:0007126//meiotic nuclear division;GO:0009639//response to red or far red light;GO:0016570//histone modification;GO:0032446//protein modification by small protein conjugation;GO:0042221//response to chemical;GO:0048518//positive regulation of biological process;GO:1903046//meiotic cell cycle process
MSTRG.65322	--	0.24	0.08	0.06	0.51	1.13	0.82	0.05	0.02	0	0.0233	0.82	0.1267	-2.694586992	0.000971476	0.005108903	-2.440572591	0.112027825	0.551064069	ethylene responsive element binding factor -related [Brassica oleracea]	-	-	-	-
MSTRG.65330	--	1.22	0.54	0.53	0	0	0	0	0	0	0	0	0.7633	9.576169382	1.98E-08	2.32E-07	-9.576169382	5.14E-06	0.000195265	BnaC09g30920D [Brassica napus]	-	-	-	-
MSTRG.65385	--	0.13	0.11	0	0.98	0.81	0.6	0	0	0.06	0.02	0.7967	0.08	-3.315904307	0.012321336	0.046631949	-2	0.602894069	0.980399641	hypothetical protein F2Q69_00009982 [Brassica cretica]	-	-	-	-
MSTRG.65408	--	2.76	6.96	8.61	0.07	0.01	0.05	8.98	11.09	17.38	12.4833	0.0433	6.11	7.139551352	5.80E-35	3.55E-33	1.030758933	0.015582149	0.158184601	PREDICTED: uncharacterized mitochondrial protein AtMg00810-like [Brassica oleracea var. oleracea] [Brassica oleracea]	-	-	-	-
MSTRG.65423	--	0.82	0.55	0.8	0	0	0	0.78	0.38	0.67	0.61	0	0.7233	9.498516827	2.29E-07	2.34E-06	-0.245851394	0.874978876	0.980399641	cell growth defect protein [Arabidopsis thaliana]	-	GO:0031224//intrinsic component of membrane	-	-
MSTRG.65468	GLN1-5	0.51	0.43	0.61	0.08	0.07	0.09	1.64	1.4	1.88	1.64	0.08	0.5167	2.691161905	1.05E-15	2.39E-14	1.6663901	1.07E-14	1.98E-12	Terpene synthase N-terminal domain [Arabidopsis suecica]	-	-	GO:0016787//hydrolase activity	-
MSTRG.65542	--	0.1	0.04	0.04	0.89	1.85	1.1	0.07	0.03	0	0.0333	1.28	0.06	-4.415037499	1.33E-07	1.40E-06	-0.847996907	0.722903889	0.980399641	BnaC05g22010D [Brassica napus]	ko03420//Nucleotide excision repair;ko03440//Homologous recombination;ko03030//DNA replication;ko03430//Mismatch repair	GO:0005911//cell-cell junction	-	-
MSTRG.65559	--	2.25	1.73	1.99	3.47	4.22	5.97	0.41	0.4	0.31	0.3733	4.5533	1.99	-1.194154647	0.010936171	0.04213025	-2.414232199	2.99E-17	7.59E-15	BnaC07g15840D [Brassica napus]	-	-	-	-
MSTRG.6556	--	0.52	0.62	0.32	1.7	1.6	1.83	0.46	0.49	0.13	0.36	1.71	0.4867	-1.812990457	0.000741942	0.004009836	-0.434937057	0.851388075	0.980399641	BnaAnng25970D [Brassica napus]	-	-	-	-
MSTRG.65562	--	1.39	1.96	1.52	4.64	4.1	4.47	0.75	0.87	0.57	0.73	4.4033	1.6233	-1.439636789	0.000790775	0.004249019	-1.152990902	0.00187623	0.030874136	non-LTR retroelement reverse transcriptase-like protein [Arabidopsis thaliana]	-	-	-	-
MSTRG.65594	--	8.9	8.54	7.8	2.59	1.64	1.48	12.2	8.91	10.45	10.52	1.9033	8.4133	2.14414926	1.00E-22	3.47E-21	0.322385295	0.001397551	0.024217482	BnaC02g41460D [Brassica napus]	-	-	-	-
MSTRG.65624	--	3.74	3.73	3.74	1.54	1.85	1.72	3.9	3.99	4.43	4.1067	1.7033	3.7367	1.133391082	2.21E-06	1.95E-05	0.136215978	0.15139321	0.63874163	hypothetical protein F2Q68_00026437 [Brassica cretica]	-	-	-	-
MSTRG.65626	--	4.03	3.68	4.85	0	0	0.01	7.65	7.2	8.44	7.7633	0.0033	4.1867	10.29462075	3.94E-14	7.97E-13	0.890874175	2.68E-08	1.72E-06	hypothetical protein F2Q70_00022476 [Brassica cretica]	-	-	-	-
MSTRG.65629	--	8.92	8.52	7.04	32.49	28.43	28.77	1.9	3.04	2.45	2.4633	29.8967	8.16	-1.873343583	5.00E-16	1.16E-14	-1.727957289	2.49E-07	1.31E-05	BnaC09g43340D [Brassica napus]	-	-	-	-
MSTRG.65671	--	0.18	0.32	0.16	1.05	1.1	1.42	0.8	0.26	0.06	0.3733	1.19	0.22	-2.435386145	0.012096945	0.045905748	0.762960803	0.317982908	0.865051772	unnamed protein product [Brassica napus]	-	-	-	-
MSTRG.6572	--	1.04	1.62	1.15	3.79	4.17	2.54	0.77	0.73	0.67	0.7233	3.5	1.27	-1.462526425	0.007318591	0.02992888	-0.812095955	0.284165866	0.832454799	mRNA turnover protein 4 homolog isoform X1 [Brassica napus]	-	GO:0005840//ribosome	-	GO:0009451//RNA modification
MSTRG.65817	--	6.98	7.12	4.06	25.89	28.4	26.43	0.41	1.05	0.29	0.5833	26.9067	6.0533	-2.152161972	2.01E-15	4.48E-14	-3.375337375	8.75E-14	1.42E-11	protein ALP1-like isoform X1 [Brassica rapa]	-	-	-	-
MSTRG.65902	dVPE	34.39	30.37	22.01	108.25	240.99	149.2	26.24	14.83	18.66	19.91	166.1467	28.9233	-2.522151616	5.94E-13	1.10E-11	-0.538740607	0.430162598	0.943661823	vacuolar-processing enzyme delta-isozyme isoform X1 [Brassica napus]	-	GO:0005618//cell wall;GO:0005773//vacuole;GO:0009536//plastid;GO:0044421//extracellular region part	GO:0004175//endopeptidase activity	GO:0003006//developmental process involved in reproduction;GO:0006950//response to stress;GO:0008219//cell death;GO:0009685//gibberellin metabolic process;GO:0010260//organ senescence;GO:0010476//gibberellin mediated signaling pathway;GO:0016192//vesicle-mediated transport;GO:0016485//protein processing;GO:0061024//membrane organization
MSTRG.66012	UGT85A5	3.3	0.66	0.37	1.55	1.96	4.44	0.17	0.11	0	0.0933	2.65	1.4433	-0.876587835	0.694108151	0.878857206	-3.950868293	0.000238166	0.005566952	BnaC05g50470D [Brassica napus]	ko01100//Metabolic pathways;ko01110//Biosynthesis of secondary metabolites	-	-	-
MSTRG.66016	GSTT3	2.28	1.85	1.64	5.74	5.22	5.2	0.75	1.06	0.8	0.87	5.3867	1.9233	-1.485783974	1.15E-08	1.39E-07	-1.144521512	0.000223534	0.005270099	Harbinger transposase-derived protein [Arabidopsis suecica]	-	-	-	-
MSTRG.66036	--	6.35	0.86	0.68	13.57	12.44	18.46	0.04	0.09	0.32	0.15	14.8233	2.63	-2.494735199	0.051931759	0.152727672	-4.132028394	0.002199438	0.035078397	hypothetical protein IGI04_015347 [Brassica rapa subsp. trilocularis] [Brassica rapa]	-	-	-	-
MSTRG.66041	STP4	1.13	0.94	0.48	2.77	3.03	5.17	0.86	0.8	0.81	0.8233	3.6567	0.85	-2.104994374	4.07E-05	0.000287072	-0.045986205	0.455032341	0.960951404	PREDICTED: sugar transport protein 4 [Brassica oleracea var. oleracea] [Brassica oleracea]	-	GO:0031224//intrinsic component of membrane	GO:0015291//secondary active transmembrane transporter activity;GO:0016628//oxidoreductase activity, acting on the CH-CH group of donors, NAD or NADP as acceptor;GO:0022891//substrate-specific transmembrane transporter activity	GO:0006812//cation transport;GO:0015851//nucleobase transport;GO:0044710//single-organism metabolic process;GO:0044763//single-organism cellular process
MSTRG.66130	--	0.58	1.3	0.75	0.7	0.92	0.83	0.15	0.1	0	0.0833	0.8167	0.8767	0.10228105	0.113943005	0.280395312	-3.3950628	0.000126394	0.003233277	01P13-2 [Brassica rapa subsp. pekinensis] [Brassica rapa]	-	-	-	-
MSTRG.66132	--	0.89	0.91	0.21	2.28	2.18	4.7	0	0.2	0	0.0667	3.0533	0.67	-2.188152097	0.007284012	0.029802059	-3.329123596	0.0309126	0.255283036	BnaC07g15840D [Brassica napus]	-	-	-	-
MSTRG.66134	--	1.62	0.63	0.24	3.59	4.24	4.28	0.05	0	0.1	0.05	4.0367	0.83	-2.281981218	0.002674698	0.012512027	-4.053111336	0.003134423	0.046610597	BnaC06g03220D [Brassica napus]	-	-	-	-
MSTRG.66155	--	9.33	11.24	12.66	3.48	2.01	2.98	23.05	15.57	17.04	18.5533	2.8233	11.0767	1.972052418	1.01E-21	3.33E-20	0.744154616	4.42E-07	2.20E-05	hypothetical protein F2Q69_00031452 [Brassica cretica]	-	-	-	-
MSTRG.66230	SBT1.7	1.87	1.6	1.47	12.41	12.77	11.09	0.56	0.71	1.32	0.8633	12.09	1.6467	-2.876193798	3.47E-46	3.13E-44	-0.931558944	0.092346794	0.497966542	PREDICTED: subtilisin-like protease SBT1.7 [Brassica oleracea var. oleracea] [Brassica oleracea]	-	GO:0005576//extracellular region;GO:0005618//cell wall	GO:0004175//endopeptidase activity;GO:0005515//protein binding	GO:0003006//developmental process involved in reproduction;GO:0009892//negative regulation of metabolic process;GO:0010191//mucilage metabolic process;GO:0019538//protein metabolic process;GO:0044702//single organism reproductive process
MSTRG.66247	TSJT1	34.1	43.72	34.31	8.1	7.85	12.52	14.28	9.2	14.4	12.6267	9.49	37.3767	1.97765792	4.72E-36	3.01E-34	-1.565664082	6.67E-10	5.99E-08	PREDICTED: stem-specific protein TSJT1 [Brassica oleracea var. oleracea] [Brassica oleracea]	-	GO:0005911//cell-cell junction;GO:0009536//plastid;GO:0016020//membrane	GO:0005488//binding	GO:0006950//response to stress;GO:0009746//response to hexose;GO:0009863//salicylic acid mediated signaling pathway;GO:0034285//response to disaccharide;GO:0042743//hydrogen peroxide metabolic process
MSTRG.6632	--	3.92	4.1	6.15	0.14	0.12	0.06	10.58	8.95	10.23	9.92	0.1067	4.7233	5.468624043	4.00E-16	9.36E-15	1.070534768	2.21E-07	1.18E-05	LOW QUALITY PROTEIN: pentatricopeptide repeat-containing protein At3g14330 [Arabidopsis lyrata subsp. lyrata] [Arabidopsis lyrata]	-	-	-	-
MSTRG.66342	argS	0.43	0.38	1.22	0	0	0.03	4.95	4.63	4.97	4.85	0.01	0.6767	6.080373416	4.58E-08	5.15E-07	2.841467521	2.41E-18	7.10E-16	arginine--tRNA ligase, cytoplasmic-like isoform X1 [Zingiber officinale]	ko00970//Aminoacyl-tRNA biosynthesis	-	-	-
MSTRG.66353	--	5.65	6.75	5.79	42.22	40.55	36.82	0.88	2.34	1.18	1.4667	39.8633	6.0633	-2.71687931	3.42E-40	2.60E-38	-2.047570114	5.43E-06	0.000205523	BnaC09g43340D [Brassica napus]	-	-	-	-
MSTRG.66354	--	0.33	0.48	0.27	2.62	2.59	2.29	0.06	0.28	0.17	0.17	2.5	0.36	-2.795859283	5.91E-06	4.87E-05	-1.08246216	0.433944032	0.946796474	BnaC09g43340D [Brassica napus]	-	-	-	-
MSTRG.66390	--	0.74	0.55	0.58	0	0	0	0.63	0.31	0.5	0.48	0	0.6233	9.283860054	1.08E-07	1.15E-06	-0.376969458	0.95284915	0.99049331	-	-	-	-	-
MSTRG.6650	--	1.82	0.7	1.03	11.09	9.81	8.64	0.75	0.84	0.64	0.7433	9.8467	1.1833	-3.056778896	1.07E-10	1.61E-09	-0.670775314	0.612536537	0.980399641	hypothetical protein IGI04_006119 [Brassica rapa subsp. trilocularis] [Brassica rapa]	-	-	-	-
MSTRG.6651	--	0	0	0	0.74	0.67	0.5	0	0	0	0	0.6367	0	-9.314394422	0.002121318	0.010232768	0	1	1	hypothetical protein IGI04_006119 [Brassica rapa subsp. trilocularis] [Brassica rapa]	-	-	-	-
MSTRG.66576	--	0	0	0	0.28	2.31	1.77	0	0	0	0	1.4533	0	-10.50514992	8.82E-07	8.27E-06	0	1	1	BnaA01g25930D [Brassica napus]	-	-	-	-
MSTRG.66593	CESA3	5.62	5.23	4.88	1.22	1.1	0.64	3.01	3.02	2.22	2.75	0.9867	5.2433	2.40984959	1.04E-46	9.57E-45	-0.931052646	2.99E-05	0.000924005	cellulose synthase A catalytic subunit 3 [UDP-forming]-like isoform X1 [Brassica rapa]	-	GO:0005911//cell-cell junction;GO:0031224//intrinsic component of membrane;GO:0031984//organelle subcompartment;GO:0043231//intracellular membrane-bounded organelle	GO:0016759//cellulose synthase activity;GO:0046914//transition metal ion binding	GO:0000281//mitotic cytokinesis;GO:0006090//pyruvate metabolic process;GO:0006109//regulation of carbohydrate metabolic process;GO:0006694//steroid biosynthetic process;GO:0006970//response to osmotic stress;GO:0006996//organelle organization;GO:0007275//multicellular organism development;GO:0009699//phenylpropanoid biosynthetic process;GO:0009746//response to hexose;GO:0009826//unidimensional ce…
MSTRG.66616	AVT1C	1.14	1.28	1.17	5.93	5.05	4.49	0.65	0.86	0.67	0.7267	5.1567	1.1967	-2.107417448	1.33E-10	1.99E-09	-0.719655709	0.248086154	0.792525343	BnaA04g22360D, partial [Brassica napus]	-	-	-	-
MSTRG.66633	--	2.63	2.31	1.96	2.83	2.44	2.55	0.99	0.83	0.79	0.87	2.6067	2.3	-0.180572246	0.060687637	0.172655448	-1.402546555	0.000921033	0.017264616	Harbinger transposase-derived protein [Arabidopsis thaliana x Arabidopsis arenosa]	-	-	-	-
MSTRG.66754	HSP90-6	0.16	0.27	0.24	1.18	0.72	1.11	0.51	0.18	0.11	0.2667	1.0033	0.2233	-2.167530486	0.000854269	0.004551545	0.255838904	0.435382547	0.947724937	BnaC05g44190D [Brassica napus]	ko04626//Plant-pathogen interaction;ko04141//Protein processing in endoplasmic reticulum	GO:0009532//plastid stroma;GO:0030312//external encapsulating structure	GO:0005515//protein binding	GO:0044267//cellular protein metabolic process;GO:0050896//response to stimulus
MSTRG.66826	SAE1A	21.92	9.11	34.17	0.13	0.2	0.23	118.37	42.9	122.06	94.4433	0.1867	21.7333	6.863301327	9.80E-31	5.06E-29	2.119539498	0.000472377	0.00991855	BnaAnng25940D, partial [Brassica napus]	ko04120//Ubiquitin mediated proteolysis	-	-	-
MSTRG.66827	--	0.94	0.43	1.96	0	0.01	0	8.42	2.1	7.62	6.0467	0.0033	1.11	8.379378367	2.78E-10	4.01E-09	2.445580373	0.000900665	0.016987462	BnaC02g23500D [Brassica napus]	ko03420//Nucleotide excision repair;ko03440//Homologous recombination;ko03030//DNA replication;ko03430//Mismatch repair	-	-	-
MSTRG.66960	--	0.09	0	0	0.9	2.57	13.68	0	0	0	0	5.7167	0.03	-7.57406786	2.83E-06	2.46E-05	-4.906890596	0.903039578	0.980399641	sporozoite surface protein 2 [Arabidopsis lyrata subsp. lyrata] [Arabidopsis lyrata]	-	-	-	-
MSTRG.67061	--	0.11	0.22	0.35	0.91	1.13	0.86	0.13	0.22	0.14	0.1633	0.9667	0.2267	-2.092446249	0.006673028	0.027642845	-0.472752997	0.789797104	0.980399641	BnaC08g42990D [Brassica napus]	-	-	-	-
MSTRG.67083	--	1.4	0.91	1.09	3.34	3.7	4.25	0.28	0.86	0.33	0.49	3.7633	1.1333	-1.731438835	0.000286495	0.001701235	-1.209718591	0.110436636	0.547457395	ORF-c [Brassica rapa]	-	-	-	-
MSTRG.67089	At5g60610	0.63	0.28	0.76	0.07	0	0	0.49	1.09	0.56	0.7133	0.0233	0.5567	4.57634937	4.10E-05	0.000289405	0.357762694	0.278792407	0.828350017	BnaAnng21920D [Brassica napus]	-	-	-	-
MSTRG.67100	At2g46260	0.93	0.97	1.41	0.34	0.3	0.33	0.85	0.98	1	0.9433	0.3233	1.1033	1.770774565	1.36E-08	1.63E-07	-0.226029164	0.77846867	0.980399641	BnaC04g11990D [Brassica napus]	-	GO:0043231//intracellular membrane-bounded organelle	GO:0046983//protein dimerization activity	GO:0003002//regionalization;GO:0003006//developmental process involved in reproduction;GO:0009639//response to red or far red light
MSTRG.67169	--	6.53	7.22	6.81	2.27	1.64	1.75	3.96	3.67	4.55	4.06	1.8867	6.8533	1.860966306	1.11E-31	5.96E-30	-0.755326131	0.028056055	0.238924895	GDSL esterase/lipase At2g03980-like [Brassica napus]	-	-	-	-
MSTRG.67281	--	0.52	0.23	0.33	1.48	1.8	1.74	0.11	0.26	0.06	0.1433	1.6733	0.36	-2.216656052	0.006589642	0.027352237	-1.328622747	0.42261215	0.940072737	DExH-box ATP-dependent RNA helicase DExH9 isoform X1 [Brassica rapa]	-	-	GO:0017111//nucleoside-triphosphatase activity;GO:0097159//organic cyclic compound binding;GO:1901363//heterocyclic compound binding	GO:0006355//regulation of transcription, DNA-templated;GO:0006364//rRNA processing;GO:0006913//nucleocytoplasmic transport;GO:0006996//organelle organization;GO:0009314//response to radiation;GO:0009791//post-embryonic development;GO:0030154//cell differentiation;GO:0033036//macromolecule localization;GO:0044702//single organism reproductive process;GO:0048608//reproductive structure development;…
MSTRG.67385	--	3.38	4.72	4.55	0.8	0.44	1.14	3.48	3.3	3.9	3.56	0.7933	4.2167	2.410103906	3.82E-10	5.43E-09	-0.244225738	0.810260263	0.980399641	-	-	-	-	-
MSTRG.67392	YUC10	1.38	1.22	1.48	0.37	0.31	0.85	1.18	1.97	1.5	1.55	0.51	1.36	1.415037499	7.91E-07	7.46E-06	0.188661564	0.05607889	0.371769916	PREDICTED: histone deacetylase 15 [Brassica oleracea var. oleracea] [Brassica oleracea]	-	GO:0043231//intracellular membrane-bounded organelle	GO:0000166//nucleotide binding;GO:0016709//oxidoreductase activity, acting on paired donors, with incorporation or reduction of molecular oxygen, NAD(P)H as one donor, and incorporation of one atom of oxygen;GO:0017136//NAD-dependent histone deacetylase activity;GO:0046914//transition metal ion binding	GO:0009292//genetic transfer;GO:0009648//photoperiodism;GO:0009653//anatomical structure morphogenesis;GO:0009850//auxin metabolic process;GO:0010468//regulation of gene expression;GO:0016570//histone modification;GO:0034645//cellular macromolecule biosynthetic process;GO:0042743//hydrogen peroxide metabolic process
MSTRG.67395	PBL1	0.54	0.23	0.25	5.61	3.68	3.84	0.07	0.07	0.03	0.0567	4.3767	0.34	-3.686225859	6.10E-15	1.31E-13	-2.584962501	0.03584363	0.280710652	BnaC03g44910D [Brassica napus]	-	GO:0016020//membrane;GO:0043231//intracellular membrane-bounded organelle;GO:0043232//intracellular non-membrane-bounded organelle	GO:0016301//kinase activity	GO:0006468//protein phosphorylation;GO:0007165//signal transduction;GO:0009620//response to fungus;GO:0009719//response to endogenous stimulus;GO:0010033//response to organic substance;GO:0043067//regulation of programmed cell death;GO:0044765//single-organism transport;GO:0052166//positive regulation by symbiont of host innate immune response;GO:0071702//organic substance transport
MSTRG.67396	YUC10	0.48	0.61	0.56	0.08	0.08	0.06	0.3	0.27	0.4	0.3233	0.0733	0.55	2.906890596	4.96E-09	6.26E-08	-0.766409372	0.351399058	0.894909471	BnaAnng35650D, partial [Brassica napus]	-	-	-	-
MSTRG.67414	CYCA3-4	3.55	3.54	3.25	8.98	7.1	8.07	2.11	2.93	2.43	2.49	8.05	3.4467	-1.223787003	1.28E-05	9.92E-05	-0.469056038	0.283791884	0.832098628	PREDICTED: cyclin-A3-4-like isoform X1 [Brassica oleracea var. oleracea] [Brassica oleracea]	ko03010//Ribosome	-	-	-
MSTRG.67438	--	4.71	4.77	5.82	13.5	12.6	11.85	3.77	4.35	3.73	3.95	12.65	5.1	-1.310568233	8.14E-05	0.000541639	-0.368644594	0.835022983	0.980399641	hypothetical protein F2Q69_00046608 [Brassica cretica]	-	-	-	-
MSTRG.67468	LOL1	0.5	0.69	0.78	4.31	3.74	3.2	0.32	0.37	0.06	0.25	3.75	0.6567	-2.513657467	9.10E-09	1.11E-07	-1.393233129	0.116928364	0.562681305	PREDICTED: protein LOL1 [Brassica oleracea var. oleracea] [Brassica oleracea]	-	GO:0043231//intracellular membrane-bounded organelle	GO:0003676//nucleic acid binding	GO:0010363//regulation of plant-type hypersensitive response;GO:0019430//removal of superoxide radicals;GO:0030154//cell differentiation
MSTRG.67518	--	4.52	4.88	3.86	1.07	0.79	0.78	3.68	3.3	2.92	3.3	0.88	4.42	2.328470941	2.54E-32	1.40E-30	-0.421580345	0.678775496	0.980399641	unnamed protein product [Brassica napus]	-	-	-	-
MSTRG.67520	RNF217	7.84	7.14	8.18	2.25	1.77	1.52	6.17	6.68	5.93	6.26	1.8467	7.72	2.063677372	1.52E-43	1.29E-41	-0.30243819	0.849004184	0.980399641	probable E3 ubiquitin-protein ligase RNF217 [Brassica rapa]	-	-	-	GO:0048444//floral organ morphogenesis
MSTRG.67541	--	0.53	0.23	0.19	1.54	2.04	1.55	0	0	0	0	1.71	0.3167	-2.432959407	0.004428438	0.019409528	-8.306821202	0.023821012	0.213353647	BnaC06g03220D [Brassica napus]	-	-	-	-
MSTRG.67543	--	1.75	0.47	0.39	3.57	3.82	4.92	0.19	0.13	0.04	0.12	4.1033	0.87	-2.23770905	0.00071593	0.003884779	-2.857980995	0.000858267	0.016300481	BnaC07g15840D [Brassica napus]	-	-	-	-
MSTRG.67609	RE2	0.67	0.56	0.31	1.52	2.98	2.54	0.1	0.23	0.25	0.1933	2.3467	0.5133	-2.192645078	0.000601386	0.003323524	-1.408805546	0.147401491	0.630382183	PREDICTED: uncharacterized mitochondrial protein AtMg00810-like [Brassica oleracea var. oleracea] [Brassica oleracea]	-	-	-	-
MSTRG.67629	--	4.67	2.74	5.72	20.23	22.32	5.87	1.13	1.43	2.23	1.5967	16.14	4.3767	-1.882736163	0.008450559	0.033816402	-1.454769355	0.013241856	0.140313668	expressed protein [Arabidopsis lyrata subsp. lyrata] [Arabidopsis lyrata]	-	-	-	-
MSTRG.6764	--	12.66	13.82	11.16	35.04	30.77	42.62	5.52	9.77	7.03	7.44	36.1433	12.5467	-1.526425438	8.70E-11	1.32E-09	-0.753929601	0.01677665	0.16705287	Reverse transcriptase domain [Arabidopsis suecica]	-	-	-	-
MSTRG.6766	--	25.08	27.27	22.62	64.31	59.77	66.29	7.44	10.41	8	8.6167	63.4567	24.99	-1.344420838	7.35E-14	1.46E-12	-1.536149122	2.53E-17	6.51E-15	hypothetical protein F2Q69_00001709 [Brassica cretica]	-	-	-	-
MSTRG.67761	--	2.45	4.2	1.82	14.49	13.11	11.41	0.71	0.73	0.75	0.73	13.0033	2.8233	-2.203410124	2.53E-07	2.57E-06	-1.9514311	0.001894419	0.031123383	BnaC09g43340D [Brassica napus]	-	-	-	-
MSTRG.67762	--	0.26	0.43	0.35	2.34	2.47	2.11	0.06	0	0.14	0.0667	2.3067	0.3467	-2.734188509	0.000150244	0.000949887	-2.378511623	0.150810896	0.637567839	BnaC09g43340D [Brassica napus]	-	-	-	-
MSTRG.6777	ASK4	0.51	0.61	0.86	0	0.08	0.03	1.65	1.5	1.96	1.7033	0.0367	0.66	4.169925001	5.26E-07	5.09E-06	1.367822861	2.09E-05	0.000676785	PREDICTED: SCF ubiquitin ligase complex protein SKP1a-like isoform X1 [Brassica oleracea var. oleracea] [Brassica oleracea]	ko04141//Protein processing in endoplasmic reticulum;ko04120//Ubiquitin mediated proteolysis	GO:0015630//microtubule cytoskeleton;GO:0016020//membrane;GO:0031461//cullin-RING ubiquitin ligase complex;GO:0043231//intracellular membrane-bounded organelle;GO:0044444//cytoplasmic part	GO:0005488//binding;GO:0016772//transferase activity, transferring phosphorus-containing groups	GO:0000018//regulation of DNA recombination;GO:0000160//phosphorelay signal transduction system;GO:0001558//regulation of cell growth;GO:0003006//developmental process involved in reproduction;GO:0006511//ubiquitin-dependent protein catabolic process;GO:0006796//phosphate-containing compound metabolic process;GO:0007017//microtubule-based process;GO:0007126//meiotic nuclear division;GO:0009755//h…
MSTRG.67943	RE2	0.88	1.46	0.72	2.01	2.32	2.38	0.07	0.22	0.28	0.19	2.2367	1.02	-1.132781114	0.113999477	0.280496632	-2.424497829	0.000270829	0.006225616	01P13-1 [Brassica rapa subsp. pekinensis] [Brassica rapa]	-	-	-	-
MSTRG.67955	--	5.74	3.29	2.39	4.61	4.18	11.51	0.74	1.3	0.83	0.9567	6.7667	3.8067	-0.829917077	0.661023002	0.85824609	-1.992440009	0.000358768	0.007874183	BnaC07g15840D [Brassica napus]	-	-	-	-
MSTRG.67968	--	2.61	3.51	2.58	8.25	7.43	7.69	2.44	2.13	1.59	2.0533	7.79	2.9	-1.425570428	0.001836884	0.009011652	-0.49808505	0.639001913	0.980399641	unnamed protein product [Brassica napus]	-	-	-	-
MSTRG.67993	--	0	0	0	1.88	9.47	4.19	0.11	0	0	0.0367	5.18	0	-12.33873638	9.64E-08	1.04E-06	5.196397213	0.726652421	0.980399641	BnaA05g14090D [Brassica napus]	-	-	-	-
MSTRG.68014	--	1.5	0.89	0.87	0.76	0.44	0.18	0.16	0.53	0.59	0.4267	0.46	1.0867	1.240203697	0.012953993	0.048654204	-1.348728154	0.197129696	0.723880113	unnamed protein product [Brassica napus]	-	-	-	-
MSTRG.68079	--	0	0	0	1.71	2.43	0.91	0	0	0	0	1.6833	0	-10.71710517	6.42E-05	0.00043618	0	1	1	BnaA10g29580D [Brassica napus]	-	-	-	-
MSTRG.68106	At2g39360	0.81	1.46	1.04	2.48	3.56	3.61	0.46	0.43	0.57	0.4867	3.2167	1.1033	-1.543697725	0.004436238	0.019440652	-1.180862848	0.056340787	0.373011747	BnaAnng27910D [Brassica napus]	-	GO:0031224//intrinsic component of membrane	GO:0004713//protein tyrosine kinase activity;GO:0032550//purine ribonucleoside binding	GO:0001101//response to acid chemical;GO:0001558//regulation of cell growth;GO:0006468//protein phosphorylation;GO:0015698//inorganic anion transport
MSTRG.68120	At4g29033	10.03	8.95	10.07	31.27	48.87	36.34	7.47	8.76	7.6	7.9433	38.8267	9.6833	-2.003472192	1.20E-09	1.63E-08	-0.285759212	0.866826979	0.980399641	BnaC06g42020D [Brassica napus]	-	-	-	-
MSTRG.68214	BUBR1	1.28	2.47	1.34	7.18	6.06	3.81	1.22	1.39	0.99	1.2	5.6833	1.6967	-1.744034178	0.001009415	0.005287452	-0.49966875	0.67130445	0.980399641	BnaC06g43250D [Brassica napus]	-	GO:0005876//spindle microtubule;GO:0098687//chromosomal region	GO:0005488//binding	GO:0007017//microtubule-based process;GO:0048449//floral organ formation;GO:0051052//regulation of DNA metabolic process;GO:0071173//spindle assembly checkpoint;GO:1902410//mitotic cytokinetic process
MSTRG.68215	--	0	0	0	0.87	2.81	0.7	0	0	0	0	1.46	0	-10.51175265	0.000673559	0.003677371	0	1	1	BnaA05g36870D [Brassica napus]	-	-	-	-
MSTRG.68302	NOB1	0.42	0.74	0.32	6.09	8.48	6.33	0.59	0.33	0.21	0.3767	6.9667	0.4933	-3.819833861	1.93E-15	4.30E-14	-0.389274403	0.96955191	0.993578655	20S-pre-rRNA D-site endonuclease nob1-like [Brassica rapa]	ko03008//Ribosome biogenesis in eukaryotes	-	-	-
MSTRG.68387	CYP97C1	1.01	0.91	0.95	2.17	2.71	2.53	1.13	0.92	0.9	0.9833	2.47	0.9567	-1.368422806	0.001382198	0.006994549	0.039664218	0.197282512	0.72398363	PREDICTED: carotene epsilon-monooxygenase, chloroplastic [Brassica oleracea var. oleracea] [Brassica oleracea]	ko01100//Metabolic pathways;ko01110//Biosynthesis of secondary metabolites;ko00906//Carotenoid biosynthesis	GO:0030529//intracellular ribonucleoprotein complex;GO:0042170//plastid membrane	GO:0016712//oxidoreductase activity, acting on paired donors, with incorporation or reduction of molecular oxygen, reduced flavin or flavoprotein as one donor, and incorporation of one atom of oxygen;GO:0046906//tetrapyrrole binding;GO:0046914//transition metal ion binding;GO:0072374//carotene epsilon hydroxylase activity	GO:0006090//pyruvate metabolic process;GO:0006633//fatty acid biosynthetic process;GO:0006779//porphyrin-containing compound biosynthetic process;GO:0009451//RNA modification;GO:0009886//post-embryonic morphogenesis;GO:0009887//organ morphogenesis;GO:0010467//gene expression;GO:0016109//tetraterpenoid biosynthetic process;GO:0048869//cellular developmental process
MSTRG.68401	--	0.62	0.75	0.52	1.79	2.52	2.19	0.4	0.61	0.06	0.3567	2.1667	0.63	-1.782053484	0.000919338	0.004865649	-0.820775438	0.462034351	0.963548909	BnaC06g14600D [Brassica napus]	-	-	-	-
MSTRG.68418	NIFU4	1.07	0.8	0.59	2.43	2.31	2.26	0.52	0.59	0.6	0.57	2.3333	0.82	-1.508696606	0.003038118	0.013981134	-0.52466199	0.793939798	0.980399641	PREDICTED: nifU-like protein 4, mitochondrial isoform X1 [Brassica oleracea var. oleracea] [Brassica oleracea]	-	GO:0043231//intracellular membrane-bounded organelle	GO:0051540//metal cluster binding	GO:0009058//biosynthetic process
MSTRG.68421	ACBP4	0.96	1.33	0.12	0	0	0	0.45	0.66	0.34	0.4833	0	0.8033	9.64985493	1.93E-05	0.000144739	-0.732980246	0.665944978	0.980399641	acyl-CoA-binding domain-containing protein 4-like [Mangifera indica]	-	GO:0043231//intracellular membrane-bounded organelle;GO:0044444//cytoplasmic part	GO:0043168//anion binding	GO:0001101//response to acid chemical;GO:0006342//chromatin silencing;GO:0009314//response to radiation;GO:0009725//response to hormone;GO:0016569//covalent chromatin modification;GO:0043414//macromolecule methylation;GO:0044765//single-organism transport;GO:1902589//single-organism organelle organization
MSTRG.68446	IDD5	1.79	1.94	1.85	4.09	6.74	4.96	0.65	1.34	1.03	1.0067	5.2633	1.86	-1.500674144	0.00193772	0.009449706	-0.885716573	0.062335806	0.396187132	protein indeterminate-domain 5, chloroplastic isoform X2 [Brassica napus]	-	GO:0009536//plastid	GO:0001071//nucleic acid binding transcription factor activity;GO:0003676//nucleic acid binding;GO:0043169//cation binding	GO:0006351//transcription, DNA-templated;GO:0010468//regulation of gene expression;GO:0080090//regulation of primary metabolic process;GO:2000112//regulation of cellular macromolecule biosynthetic process
MSTRG.68511	--	0.84	1.33	1.15	0.34	0.34	0.38	1.57	0.89	1.49	1.3167	0.3533	1.1067	1.647118977	0.000621678	0.003425008	0.250669412	0.292599243	0.842100876	hypothetical protein F2Q68_00036234 [Brassica cretica]	-	-	-	-
MSTRG.68535	--	6.68	4.93	7.48	1.03	1.28	1.77	9.74	9.93	8.82	9.4967	1.36	6.3633	2.226176045	3.31E-18	8.90E-17	0.577638519	6.24E-05	0.001761968	-	-	-	-	-
MSTRG.68539	MYOB7	0.38	0.47	0.4	1.96	1.9	1.89	0.62	0.49	0.53	0.5467	1.9167	0.4167	-2.201633861	2.43E-06	2.13E-05	0.39176772	0.111986911	0.550999838	myosin-binding protein 7 [Brassica rapa]	-	GO:0043231//intracellular membrane-bounded organelle	-	-
MSTRG.68542	PIP2-5	3.37	4.69	4.05	1.56	1.13	1.19	8.43	6.7	9.21	8.1133	1.2933	4.0367	1.642070308	2.25E-17	5.74E-16	1.007130303	1.23E-10	1.25E-08	PREDICTED: probable aquaporin PIP2-5 [Brassica oleracea var. oleracea] [Brassica oleracea]	-	GO:0031224//intrinsic component of membrane	GO:0005488//binding	GO:0000041//transition metal ion transport;GO:0009267//cellular response to starvation;GO:0042044//fluid transport
MSTRG.68555	SMZ	0.14	0.35	0.47	0	0	0	0.92	0.85	1.49	1.0867	0	0.32	8.321928095	2.55E-05	0.000187159	1.763765654	0.00033741	0.007490616	PREDICTED: AP2-like ethylene-responsive transcription factor SMZ [Brassica oleracea var. oleracea] [Brassica oleracea]	-	GO:0043231//intracellular membrane-bounded organelle	GO:0001071//nucleic acid binding transcription factor activity;GO:0003676//nucleic acid binding	GO:0000160//phosphorelay signal transduction system;GO:0003006//developmental process involved in reproduction;GO:0009653//anatomical structure morphogenesis;GO:0009657//plastid organization;GO:0010468//regulation of gene expression;GO:0034645//cellular macromolecule biosynthetic process;GO:0042221//response to chemical;GO:0044707//single-multicellular organism process
MSTRG.68632	--	0	0	0	0.48	0.99	9.22	0	0	0	0	3.5633	0	-11.79901173	6.83E-06	5.57E-05	0	1	1	PREDICTED: LOW QUALITY PROTEIN: thionin-like protein 1 [Camelina sativa]	-	-	-	-
MSTRG.68639	ACA11	0.68	0.81	0.66	1.77	2.5	1.69	0.53	0.51	0.48	0.5067	1.9867	0.7167	-1.470975671	0.001732825	0.008553374	-0.500265336	0.600595842	0.980399641	calmodulin-stimulated calcium-ATPase [Brassica oleracea]	-	GO:0005774//vacuolar membrane;GO:0009532//plastid stroma;GO:0031224//intrinsic component of membrane;GO:0044434//chloroplast part	GO:0005515//protein binding;GO:0016836//hydro-lyase activity;GO:0019829//cation-transporting ATPase activity;GO:0032550//purine ribonucleoside binding;GO:0046914//transition metal ion binding	GO:0006605//protein targeting;GO:0006816//calcium ion transport;GO:0006970//response to osmotic stress;GO:0009617//response to bacterium;GO:0009891//positive regulation of biosynthetic process;GO:0043067//regulation of programmed cell death;GO:0044237//cellular metabolic process;GO:0072503//cellular divalent inorganic cation homeostasis
MSTRG.68647	--	1.61	0.4	0.55	4.02	6.68	5.91	0.68	0.76	0.81	0.75	5.5367	0.8533	-2.697836358	0.000164098	0.001029995	-0.186218809	0.830268996	0.980399641	pentatricopeptide repeat-containing protein At5g15980, mitochondrial [Arabidopsis lyrata subsp. lyrata] [Arabidopsis lyrata]	-	-	-	-
MSTRG.68874	--	2.71	2.44	0.82	1.66	1.67	2.53	0.18	0.22	0.14	0.18	1.9533	1.99	0.026830267	0.100141501	0.254219863	-3.466699619	3.98E-11	4.42E-09	BnaC07g15850D [Brassica napus]	-	-	-	-
MSTRG.68880	--	2.09	2.48	2.64	3.07	3.07	3.84	0.29	0.44	0.38	0.37	3.3267	2.4033	-0.469040556	0.370377958	0.637052845	-2.699439583	9.33E-20	3.17E-17	GAG-pre-integrase domain, partial [Arabidopsis suecica]	-	-	-	-
MSTRG.68882	--	1.06	0.68	0.5	2.54	1.59	2.89	0.03	0.22	0	0.0833	2.34	0.7467	-1.647972298	0.006778368	0.028021435	-3.163498732	0.0007207	0.014146167	BnaC07g15840D [Brassica napus]	-	-	-	-
MSTRG.68884	--	1.57	1.39	0.97	1.24	2.36	2.71	0.14	0.38	0.18	0.2333	2.1033	1.31	-0.683110693	0.880139371	0.967451377	-2.489102485	8.94E-05	0.002410079	BnaC07g15840D [Brassica napus]	-	-	-	-
MSTRG.68981	LRR-RLK	1.62	1.71	1.3	0.36	0.45	0.53	0.66	1.37	0.76	0.93	0.4467	1.5433	1.788779193	9.76E-16	2.22E-14	-0.730747071	0.274400503	0.823766802	LOW QUALITY PROTEIN: probable leucine-rich repeat receptor-like serine/threonine-protein kinase At3g14840 [Jatropha curcas]	-	-	GO:0004672//protein kinase activity;GO:0032550//purine ribonucleoside binding	GO:0006464//cellular protein modification process;GO:0016310//phosphorylation
MSTRG.68997	--	0.16	0.2	0.42	0.85	1.02	0.4	0.61	0.72	1.32	0.8833	0.7567	0.26	-1.541146268	0.188930868	0.405363324	1.764446331	0.00072588	0.014240786	filamentous hemagglutinin transporter [Arabidopsis thaliana]	-	-	-	-
MSTRG.69005	--	9.41	8.29	10.35	1.9	1.62	1.74	10.83	10.77	8.78	10.1267	1.7533	9.35	2.414866066	1.90E-34	1.13E-32	0.115121099	0.022044841	0.202394046	-	-	-	-	-
MSTRG.69022	CP29B	4.16	3.03	4.82	3.93	3.89	4.64	9.27	5.69	9.56	8.1733	4.1533	4.0033	-0.053067917	0.009167381	0.036213085	1.029722828	2.23E-08	1.46E-06	BnaUnng05280D, partial [Brassica napus]	ko03420//Nucleotide excision repair;ko03440//Homologous recombination;ko03030//DNA replication;ko03430//Mismatch repair	-	-	-
MSTRG.69024	--	2.36	1.08	1.89	0.76	0.91	0.64	21.16	10.91	18.45	16.84	0.77	1.7767	1.206242681	2.12E-05	0.00015749	3.244647201	2.57E-34	3.99E-31	replication protein A 70 kDa DNA-binding subunit B-like isoform X2 [Brassica rapa]	ko03420//Nucleotide excision repair;ko03440//Homologous recombination;ko03030//DNA replication;ko03430//Mismatch repair	-	-	-
MSTRG.69026	CP29B	0.45	0.99	0.29	0.44	0.56	0.51	21.84	8.38	19.03	16.4167	0.5033	0.5767	0.196223488	0.132532423	0.31302921	4.831279782	2.11E-16	4.85E-14	BnaUnng05280D, partial [Brassica napus]	ko03420//Nucleotide excision repair;ko03440//Homologous recombination;ko03030//DNA replication;ko03430//Mismatch repair	-	-	-
MSTRG.69111	GT-2	0	0.12	0	0.41	1.17	0.8	0	0	0	0	0.7933	0.04	-4.309855263	0.000232944	0.001413381	-5.321928095	0.321519492	0.86777541	LOW QUALITY PROTEIN: trihelix transcription factor GT-2 [Brassica napus]	-	GO:0043231//intracellular membrane-bounded organelle	GO:0000975//regulatory region DNA binding;GO:0001071//nucleic acid binding transcription factor activity	GO:0010468//regulation of gene expression;GO:0034645//cellular macromolecule biosynthetic process
MSTRG.69129	--	0.41	0.79	0.36	3.74	3.33	2.43	0.28	0.63	0.48	0.4633	3.1667	0.52	-2.606381484	7.09E-05	0.000477797	-0.166461146	0.841353211	0.980399641	PREDICTED: CASP-like protein 4U1 [Brassica oleracea var. oleracea] [Brassica oleracea]	ko01100//Metabolic pathways;ko01110//Biosynthesis of secondary metabolites;ko01230//Biosynthesis of amino acids;ko00340//Histidine metabolism	-	-	-
MSTRG.69144	--	0.14	0.32	0.21	1.03	1.16	0.8	0.29	0.27	0.17	0.2433	0.9967	0.2233	-2.157912484	0.00580454	0.02451735	0.123735368	0.571620168	0.980399641	tRNA (adenine(58)-N(1))-methyltransferase non-catalytic subunit trm6 [Eutrema salsugineum]	-	GO:0005623//cell	-	GO:0006221//pyrimidine nucleotide biosynthetic process;GO:0006412//translation;GO:0006886//intracellular protein transport;GO:0007049//cell cycle
MSTRG.6916	TSC10B	0.99	1.26	1.19	0.28	0.33	0.5	0.82	0.53	0.87	0.74	0.37	1.1467	1.631848888	0.000174133	0.001087102	-0.631848888	0.598249776	0.980399641	PREDICTED: LOW QUALITY PROTEIN: 3-dehydrosphinganine reductase TSC10B [Brassica oleracea var. oleracea] [Brassica oleracea]	ko01100//Metabolic pathways;ko00600//Sphingolipid metabolism	-	GO:0016616//oxidoreductase activity, acting on the CH-OH group of donors, NAD or NADP as acceptor;GO:0016740//transferase activity;GO:0032550//purine ribonucleoside binding	GO:0006464//cellular protein modification process;GO:0044710//single-organism metabolic process
MSTRG.69191	EIL3	0.13	0	0.1	0.8	0.38	0.52	0.1	0.04	0.06	0.0667	0.5667	0.0767	-2.88582898	0.00911257	0.036034055	-0.201633861	0.860353582	0.980399641	ETHYLENE INSENSITIVE 3-like 3 protein [Brassica napus]	ko04075//Plant hormone signal transduction;ko04016//MAPK signaling pathway - plant	GO:0043231//intracellular membrane-bounded organelle	GO:0001071//nucleic acid binding transcription factor activity;GO:0003676//nucleic acid binding	GO:0000160//phosphorelay signal transduction system;GO:0000302//response to reactive oxygen species;GO:0006605//protein targeting;GO:0006952//defense response;GO:0006972//hyperosmotic response;GO:0009620//response to fungus;GO:0009755//hormone-mediated signaling pathway;GO:0009863//salicylic acid mediated signaling pathway;GO:0010039//response to iron ion;GO:0010468//regulation of gene expression…
MSTRG.69223	DUF1	0.57	0.44	0.43	1.64	1.53	1.69	0.23	0.45	0.26	0.3133	1.62	0.48	-1.754887502	0.000227417	0.00138286	-0.61533615	0.54490096	0.980399641	Agenet domain containing protein [Brassica oleracea]	-	GO:0043231//intracellular membrane-bounded organelle	-	GO:0003002//regionalization;GO:0009886//post-embryonic morphogenesis;GO:0009887//organ morphogenesis;GO:0009908//flower development;GO:0016070//RNA metabolic process;GO:0016569//covalent chromatin modification;GO:0031047//gene silencing by RNA;GO:0040029//regulation of gene expression, epigenetic;GO:0043414//macromolecule methylation;GO:0044710//single-organism metabolic process;GO:0048507//meris…
MSTRG.69257	RH30	1.21	0.69	1.29	0.5	0.27	0.4	1.13	0.95	0.9	0.9933	0.39	1.0633	1.447047894	0.000850469	0.00453274	-0.098244093	0.653297881	0.980399641	lysine-specific demethylase JMJ25-like isoform X1 [Brassica napus]	-	-	-	-
MSTRG.69293	--	1.34	1.97	1.18	3.97	3.16	3.31	0.81	0.61	0.71	0.71	3.48	1.4967	-1.217334362	0.00898724	0.035605869	-1.075862015	0.009448491	0.109311817	BnaC04g26220D [Brassica napus]	-	-	-	-
MSTRG.69300	--	0	0	0	1.24	1.42	0.08	0	0	0	0	0.9133	0	-9.834997677	0.000502349	0.002825918	0	1	1	BnaC06g24880D [Brassica napus]	-	GO:0043231//intracellular membrane-bounded organelle	-	GO:0007568//aging
MSTRG.69334	--	3.78	3.2	4.48	14.74	11.8	12.76	4.98	3.18	2.06	3.4067	13.1	3.82	-1.777922268	9.03E-05	0.000595135	-0.165211848	0.433629944	0.946603876	BnaCnng72800D, partial [Brassica napus]	-	GO:0043231//intracellular membrane-bounded organelle	-	-
MSTRG.69437	--	2.31	2.02	1.18	7.7	8.05	6.79	1.65	1.61	0.77	1.3433	7.5133	1.8367	-2.032363292	7.46E-07	7.06E-06	-0.45127248	0.783815033	0.980399641	hypothetical protein HID58_045784 [Brassica napus]	-	-	-	-
MSTRG.69438	--	2.13	1.66	1.67	7	7.7	5.71	2.09	0.74	0.85	1.2267	6.8033	1.82	-1.902303326	1.07E-05	8.43E-05	-0.569195185	0.704373189	0.980399641	hypothetical protein HID58_045784 [Brassica napus]	-	-	-	-
MSTRG.69522	--	2.83	3.31	4.49	1.13	1.09	1.01	2.97	2.61	3.28	2.9533	1.0767	3.5433	1.718535527	7.13E-14	1.42E-12	-0.262762993	0.836938387	0.980399641	BnaC09g36530D [Brassica napus]	-	-	-	-
MSTRG.69531	--	0.57	0.62	0.99	3.24	2.64	2.87	1.02	0.94	0.76	0.9067	2.9167	0.7267	-2.004954882	0.002857443	0.013254086	0.319278516	0.282617613	0.831847629	unnamed protein product [Brassica napus]	-	-	-	-
MSTRG.6960	NUDT21	0.31	0.23	1.01	2.36	3.03	4.27	1	0.38	0.52	0.6333	3.22	0.5167	-2.639754974	0.001114993	0.005779961	0.293731203	0.44192112	0.951940208	nudix hydrolase 21, chloroplastic [Brassica rapa]	-	GO:0009536//plastid	GO:0052841//inositol bisdiphosphate tetrakisphosphate diphosphatase activity;GO:0052842//inositol diphosphate pentakisphosphate diphosphatase activity	-
MSTRG.69714	--	0	0	0	1.13	1.61	1.26	0	0	0	0	1.3333	0	-10.38082178	8.83E-06	7.05E-05	0	1	1	BnaC08g11220D [Brassica napus]	-	-	-	-
MSTRG.69738	--	0.44	0.63	0.58	0.6	0.48	0.54	2.03	1.22	1.99	1.7467	0.54	0.55	0.026472211	0.146341137	0.337318663	1.667100787	9.08E-08	5.19E-06	Transposon En/Spm-like [Arabidopsis thaliana x Arabidopsis arenosa]	-	-	-	-
MSTRG.69739	--	0.82	0.53	0.86	0.1	0.48	0.25	1.44	1.15	2.81	1.8	0.2767	0.7367	1.412863128	0.001504019	0.007536152	1.288913038	0.000353138	0.007773485	Zinc finger CCHC-type [Arabidopsis suecica]	-	-	-	-
MSTRG.69887	TUBA2	28.19	30.48	23.83	37.08	37.71	35.31	11.27	16.85	11.1	13.0733	36.7	27.5	-0.416348444	0.036829561	0.115954475	-1.072804584	3.69E-06	0.000146476	tubulin alpha chain-like [Tripterygium wilfordii]	ko04145//Phagosome	GO:0005911//cell-cell junction;GO:0009532//plastid stroma;GO:0015630//microtubule cytoskeleton;GO:0030312//external encapsulating structure;GO:0031090//organelle membrane;GO:0043234//protein complex	GO:0005198//structural molecule activity;GO:0017111//nucleoside-triphosphatase activity;GO:0032550//purine ribonucleoside binding	GO:0006006//glucose metabolic process;GO:0006637//acyl-CoA metabolic process;GO:0006970//response to osmotic stress;GO:0006996//organelle organization;GO:0007017//microtubule-based process;GO:0009629//response to gravity;GO:0010038//response to metal ion;GO:0016192//vesicle-mediated transport;GO:0032989//cellular component morphogenesis;GO:0040007//growth;GO:0043623//cellular protein complex asse…
MSTRG.69894	--	1.5	1.65	0.8	6.56	7.68	6.36	0.28	0.96	0.67	0.6367	6.8667	1.3167	-2.382719779	1.74E-07	1.81E-06	-1.048280015	0.254468034	0.801638146	BnaC09g43340D [Brassica napus]	-	-	-	-
MSTRG.699	--	2.19	2.61	1.56	0.54	0.51	0.56	1.89	1.88	1.86	1.8767	0.5367	2.12	1.981966077	1.98E-14	4.10E-13	-0.175891843	0.561654961	0.980399641	BnaC03g72880D [Brassica napus]	ko03420//Nucleotide excision repair;ko03440//Homologous recombination;ko03030//DNA replication;ko03430//Mismatch repair	-	-	-
MSTRG.69956	--	0.02	0	0	0.07	0.27	0.14	0	0	0	0	0.16	0.0067	-4.584962501	0.006788401	0.028061525	-2.736965594	0.903039578	0.980399641	cyclin-D1-binding protein [Arabidopsis thaliana]	-	GO:0043231//intracellular membrane-bounded organelle	-	GO:0007049//cell cycle
MSTRG.70007	--	2.86	2.77	3.72	0	0	0	7.81	6.72	5.77	6.7667	0	3.1167	11.60578815	8.47E-15	1.81E-13	1.118441457	2.73E-09	2.13E-07	BnaA09g29430D [Brassica napus]	-	-	-	-
MSTRG.70024	ABCG25	7.24	8.08	9.22	8.27	6.61	6.67	4.36	4.53	3.11	4	7.1833	8.18	0.18744738	7.89E-06	6.35E-05	-1.032100843	0.000758238	0.014762131	PREDICTED: ABC transporter G family member 25 [Brassica oleracea var. oleracea] [Brassica oleracea]	-	GO:0031224//intrinsic component of membrane	GO:0015098//molybdate ion transmembrane transporter activity;GO:0032550//purine ribonucleoside binding;GO:0042626//ATPase activity, coupled to transmembrane movement of substances	GO:0001101//response to acid chemical;GO:0015698//inorganic anion transport;GO:0015718//monocarboxylic acid transport
MSTRG.70025	ABCG25	9.21	12.49	10.85	10.6	8.24	7.57	3.83	4.91	4.47	4.4033	8.8033	10.85	0.301573242	9.78E-06	7.74E-05	-1.301027077	1.08E-05	0.000383212	PREDICTED: ABC transporter G family member 25 [Brassica oleracea var. oleracea] [Brassica oleracea]	-	GO:0031224//intrinsic component of membrane	GO:0005488//binding;GO:0015405//P-P-bond-hydrolysis-driven transmembrane transporter activity;GO:0017111//nucleoside-triphosphatase activity	GO:0001101//response to acid chemical;GO:0010051//xylem and phloem pattern formation;GO:0015718//monocarboxylic acid transport
MSTRG.70159	SCPL6	2.43	2.63	3.68	0.66	0.43	0.43	3.81	4.44	4.71	4.32	0.5067	2.9133	2.523561956	8.17E-22	2.71E-20	0.568360533	9.34E-05	0.002493301	serine carboxypeptidase-like 2 [Eutrema salsugineum]	-	GO:0005618//cell wall	GO:0004180//carboxypeptidase activity;GO:0016753//O-sinapoyltransferase activity	GO:0000097//sulfur amino acid biosynthetic process;GO:0006090//pyruvate metabolic process;GO:0006544//glycine metabolic process;GO:0006633//fatty acid biosynthetic process;GO:0006732//coenzyme metabolic process;GO:0006753//nucleoside phosphate metabolic process;GO:0009683//indoleacetic acid metabolic process;GO:0009694//jasmonic acid metabolic process;GO:0019538//protein metabolic process
MSTRG.70303	--	0.96	0.58	0.66	3.93	4.33	3.61	0.29	0.44	0.17	0.3	3.9567	0.7333	-2.431744506	1.56E-08	1.85E-07	-1.289506617	0.120209385	0.570695244	Histone deacetylase complex subunit SAP30 Sin3 binding domain [Arabidopsis suecica]	-	GO:0043231//intracellular membrane-bounded organelle	-	-
MSTRG.70414	--	1.71	0.9	1.23	3.45	4.37	3.98	1.57	0.95	0.58	1.0333	3.9333	1.28	-1.619608644	0.009931282	0.038790458	-0.308838095	0.956337416	0.991113248	PREDICTED: protein indeterminate-domain 6, chloroplastic-like [Brassica oleracea var. oleracea] [Brassica oleracea]	-	-	-	-
MSTRG.70440	--	1.98	2.96	2.31	7.1	8.78	7.25	1.08	1.21	1.07	1.12	7.71	2.4167	-1.673712366	0.000557228	0.003103086	-1.109519762	0.0928562	0.499352157	hypothetical protein HID58_047152 [Brassica napus]	-	-	-	-
MSTRG.70531	SRK2C	3.58	4.38	3.74	1.24	0.88	0.7	2.98	2.29	2.69	2.6533	0.94	3.9	2.052741462	3.76E-18	1.01E-16	-0.555668194	0.386357935	0.919071128	PREDICTED: LOW QUALITY PROTEIN: serine/threonine-protein kinase SRK2C-like [Brassica oleracea var. oleracea] [Brassica oleracea]	ko04075//Plant hormone signal transduction;ko04016//MAPK signaling pathway - plant	GO:0030529//intracellular ribonucleoprotein complex;GO:0043231//intracellular membrane-bounded organelle	GO:0004672//protein kinase activity;GO:0005198//structural molecule activity;GO:0032550//purine ribonucleoside binding	GO:0006464//cellular protein modification process;GO:0006796//phosphate-containing compound metabolic process;GO:0006950//response to stress;GO:0009755//hormone-mediated signaling pathway;GO:0010467//gene expression;GO:0010646//regulation of cell communication
MSTRG.70567	--	0.93	1.03	0.89	2.22	3.25	3.55	0.4	0.6	0.09	0.3633	3.0067	0.95	-1.662165514	0.005954753	0.025071967	-1.386633784	0.114350876	0.556760464	BnaC06g12640D [Brassica napus]	-	-	-	-
MSTRG.70721	UGE4	8.63	8.75	8.09	25.15	20.15	20.95	2.44	2.84	2.9	2.7267	22.0833	8.49	-1.379121495	2.65E-09	3.44E-08	-1.638626211	2.29E-17	6.00E-15	BnaCnng11940D [Brassica napus]	ko01100//Metabolic pathways;ko04145//Phagosome;ko04070//Phosphatidylinositol signaling system;ko00562//Inositol phosphate metabolism	GO:0005794//Golgi apparatus	GO:0005515//protein binding;GO:0016857//racemase and epimerase activity, acting on carbohydrates and derivatives	GO:0009250//glucan biosynthetic process;GO:0010015//root morphogenesis;GO:0010396//rhamnogalacturonan II metabolic process;GO:0042546//cell wall biogenesis;GO:0045229//external encapsulating structure organization
MSTRG.70722	UGE4	1.03	0.76	0.62	2.46	2.59	3.06	0.22	0.27	0.11	0.2	2.7033	0.8033	-1.750668768	0.000196692	0.001214235	-2.005998741	0.003438327	0.050417974	BnaCnng11940D [Brassica napus]	ko01100//Metabolic pathways;ko04145//Phagosome;ko04070//Phosphatidylinositol signaling system;ko00562//Inositol phosphate metabolism	-	-	-
MSTRG.70732	MAG	0.56	0.44	0.46	1.94	3.01	2.06	0.29	0.35	0.18	0.2733	2.3367	0.4867	-2.263446075	0.000202405	0.001244447	-0.832272554	0.491836893	0.975577214	DNA-3-methyladenine glycosylase-like [Brassica napus]	ko03410//Base excision repair	GO:0043231//intracellular membrane-bounded organelle	GO:0043733//DNA-3-methylbase glycosylase activity	GO:0006281//DNA repair
MSTRG.70781	dVPE	0.65	0.29	0.68	11.72	46.3	29.62	0	0.12	0.69	0.27	29.2133	0.54	-5.757523766	7.89E-14	1.56E-12	-1	0.525206565	0.980399641	PREDICTED: vacuolar-processing enzyme delta-isozyme-like [Brassica oleracea var. oleracea] [Brassica oleracea]	-	GO:0005618//cell wall;GO:0009536//plastid;GO:0044421//extracellular region part	GO:0004175//endopeptidase activity	GO:0003006//developmental process involved in reproduction;GO:0008219//cell death;GO:0009685//gibberellin metabolic process;GO:0010476//gibberellin mediated signaling pathway;GO:0016485//protein processing;GO:0044707//single-multicellular organism process
MSTRG.70790	--	8.95	7.5	8.85	1.87	1.7	2.22	11.41	8.87	12.43	10.9033	1.93	8.4333	2.127502132	2.04E-46	1.85E-44	0.370594375	4.76E-05	0.001388113	unnamed protein product [Brassica napus]	-	-	-	-
MSTRG.70822	--	0.77	0.89	0.61	0.03	0.1	0.17	1.48	0.96	1.88	1.44	0.1	0.7567	2.919657892	5.11E-07	4.96E-06	0.928339015	0.002338332	0.036825939	LOW QUALITY PROTEIN: BEL1-like homeodomain protein 2 [Brassica napus]	-	-	-	-
MSTRG.70855	--	0.45	0.64	1.05	0.53	0.44	0.26	2.42	1.58	2.21	2.07	0.41	0.7133	0.798952481	0.025279834	0.085077068	1.536982472	4.77E-05	0.0013897	hypothetical protein DY000_02020704 [Brassica cretica]	-	-	-	-
MSTRG.70918	SH3P3	0.09	0.14	0.19	2.46	1.83	1.79	0.15	0.2	0.06	0.1367	2.0267	0.14	-3.855610091	3.58E-09	4.58E-08	-0.034765418	0.790187825	0.980399641	BnaC01g27750D [Brassica napus]	ko00910//Nitrogen metabolism	GO:0009536//plastid	GO:0016836//hydro-lyase activity;GO:0046914//transition metal ion binding	GO:0044699//single-organism process
MSTRG.70956	HMG2	1.22	0.77	0.93	3.18	3.1	2.72	0.88	1.41	0.6	0.9633	3	0.9733	-1.623956632	0.002355026	0.011195923	-0.014898876	0.523635571	0.980399641	PREDICTED: 3-hydroxy-3-methylglutaryl-coenzyme A reductase 2 [Brassica oleracea var. oleracea] [Brassica oleracea]	ko01100//Metabolic pathways;ko01110//Biosynthesis of secondary metabolites;ko00900//Terpenoid backbone biosynthesis	-	-	-
MSTRG.71010	LPAT2	0.99	0.76	1.08	3.11	2.54	2.21	0.36	0.86	0.56	0.5933	2.62	0.9433	-1.473727259	0.005871737	0.024762367	-0.668924812	0.43734758	0.949170441	PREDICTED: 1-acyl-sn-glycerol-3-phosphate acyltransferase 2-like [Raphanus sativus]	ko01100//Metabolic pathways;ko01110//Biosynthesis of secondary metabolites;ko00564//Glycerophospholipid metabolism;ko00561//Glycerolipid metabolism	GO:0031090//organelle membrane;GO:0031224//intrinsic component of membrane;GO:0043231//intracellular membrane-bounded organelle	GO:0016411//acylglycerol O-acyltransferase activity	GO:0044707//single-multicellular organism process;GO:0046341//CDP-diacylglycerol metabolic process;GO:0046471//phosphatidylglycerol metabolic process
MSTRG.71037	--	0.39	0.17	0.25	8.13	5.52	4.41	0	0	0	0	6.02	0.27	-4.478732175	7.44E-09	9.22E-08	-8.076815597	0.10735235	0.540395259	unnamed protein product [Brassica napus]	-	-	-	-
MSTRG.71058	--	0.08	0.2	0.12	0	0.01	0	0	0	0	0	0.0033	0.1333	5.321928095	0.000227191	0.001381585	-7.058893689	0.001283963	0.022570476	BnaC04g55630D [Brassica napus]	-	-	-	-
MSTRG.71113	--	0.57	1.28	1.41	0.52	0.09	0.34	0.86	0.53	0.67	0.6867	0.3167	1.0867	1.778872546	0.006492939	0.027007198	-0.662227627	0.64432244	0.980399641	unnamed protein product, partial [Brassica napus]	-	-	-	-
MSTRG.71151	--	7.02	6.46	6.67	15.05	13.17	14.87	5.71	4.81	5.23	5.25	14.3633	6.7167	-1.09657326	0.001579972	0.007876102	-0.35542801	0.917100929	0.982089918	unnamed protein product [Brassica napus]	-	-	-	-
MSTRG.71179	--	3.81	5.6	3.32	12.82	12	14.81	1.44	1.28	1.54	1.42	13.21	4.2433	-1.638360548	2.06E-05	0.000153361	-1.579307084	0.000423853	0.009049876	hypothetical protein F2Q70_00008886 [Brassica cretica]	-	-	-	-
MSTRG.71198	--	0.73	1.4	1.14	0.52	0.63	1.48	0.13	0	0.26	0.13	0.8767	1.09	0.314227836	0.079610169	0.213215722	-3.067744607	0.000524703	0.010823415	hypothetical protein IGI04_042731 [Brassica rapa subsp. trilocularis] [Brassica rapa]	-	-	-	-
MSTRG.7120	PDIL1-1	8.28	8.46	6.54	19.57	23.12	19.41	2.84	4.04	4.02	3.6333	20.7	7.76	-1.41550221	7.94E-08	8.64E-07	-1.094762923	0.000219312	0.005182924	protein disulfide isomerase-like 1-2 [Brassica napus]	ko04141//Protein processing in endoplasmic reticulum	-	-	-
MSTRG.71207	At1g13609	3.16	2.15	2.4	41.77	85.78	45.51	2.01	1.72	1.88	1.87	57.6867	2.57	-4.488397637	1.53E-34	9.19E-33	-0.458730089	0.813524629	0.980399641	defensin-like protein 287 [Brassica rapa]	-	GO:0043231//intracellular membrane-bounded organelle	-	GO:0051704//multi-organism process
MSTRG.71222	--	22.19	16.89	15.65	8.93	7.82	8.28	33.15	21.55	30.64	28.4467	8.3433	18.2433	1.128673566	4.90E-18	1.30E-16	0.640890254	3.00E-06	0.00012183	metallothionein-like protein [Brassica napus]	-	-	GO:0046914//transition metal ion binding	GO:0001101//response to acid chemical;GO:0010038//response to metal ion;GO:0015698//inorganic anion transport
MSTRG.7124	--	0.09	0.15	0.35	0.03	0.06	0.02	0.19	0.36	0.17	0.24	0.0367	0.1967	2.423211431	0.00984354	0.038495787	0.287281952	0.474414712	0.967960557	hypothetical protein DY000_02006998 [Brassica cretica]	-	-	-	-
MSTRG.71263	--	4.42	4.81	5.42	1.19	1.15	1.45	3.66	3.46	4.01	3.71	1.2633	4.8833	1.950630911	1.83E-31	9.71E-30	-0.396447072	0.720481963	0.980399641	BnaA02g17950D [Brassica napus]	ko03420//Nucleotide excision repair;ko03440//Homologous recombination;ko03030//DNA replication;ko03430//Mismatch repair	-	-	-
MSTRG.71287	BARD1	0.88	0.78	0.97	2.51	1.87	2.31	0.53	0.39	0.29	0.4033	2.23	0.8767	-1.346943411	0.00031097	0.001832498	-1.120055752	0.0215162	0.199438235	Retrotransposon gag domain [Arabidopsis suecica]	-	-	-	-
MSTRG.71325	--	1.28	1.17	1	0.38	0.47	0.56	1.79	1.67	2.16	1.8733	0.47	1.15	1.290901199	6.75E-07	6.43E-06	0.703973769	0.000568841	0.011602943	alpha-ketoglutarate-dependent dioxygenase alkB [Brassica napus]	-	-	-	-
MSTRG.71346	HDG12	1.78	2.25	2.33	5.45	5.33	5.82	0.64	0.6	0.64	0.6267	5.5333	2.12	-1.384084571	7.03E-05	0.000474279	-1.758294104	1.58E-06	6.86E-05	BnaCnng65280D [Brassica napus]	-	GO:0043231//intracellular membrane-bounded organelle	GO:0001071//nucleic acid binding transcription factor activity;GO:0004177//aminopeptidase activity;GO:0043169//cation binding;GO:0044212//transcription regulatory region DNA binding	GO:0000904//cell morphogenesis involved in differentiation;GO:0006498//N-terminal protein lipidation;GO:0006508//proteolysis;GO:0009409//response to cold;GO:0009814//defense response, incompatible interaction;GO:0009827//plant-type cell wall modification;GO:0010467//gene expression
MSTRG.71414	--	14.37	13.83	15.63	3.53	3.48	3.77	18.5	16.44	15.4	16.78	3.5933	14.61	2.023561501	2.63E-75	4.57E-73	0.199786538	3.86E-05	0.001155568	BnaA10g12550D [Brassica napus]	-	-	-	-
MSTRG.71415	--	11.33	8.85	11.38	1.98	1.97	2.88	19.09	11.48	20	16.8567	2.2767	10.52	2.208139722	5.70E-29	2.74E-27	0.680184573	1.54E-05	0.000520459	BnaA10g12550D [Brassica napus]	-	-	-	-
MSTRG.71447	--	0.78	0.93	1.95	0.04	0.28	0.3	0.87	1.12	0.51	0.8333	0.2067	1.22	2.561503528	1.34E-05	0.000103291	-0.549915554	0.663060888	0.980399641	BnaC09g12440D [Brassica napus]	-	-	-	-
MSTRG.71485	--	2.6	3.26	2.97	0.74	0.37	0.79	3.18	2.25	1.74	2.39	0.6333	2.9433	2.216414019	8.78E-12	1.46E-10	-0.300440319	0.920359311	0.983104889	hypothetical protein F2Q69_00049377 [Brassica cretica]	-	-	-	-
MSTRG.71512	--	2.14	2.41	2.36	6.57	7.21	5.91	2.88	2.03	2.43	2.4467	6.5633	2.3033	-1.510705496	0.000109282	0.000708283	0.087094352	0.159139684	0.65393145	unnamed protein product [Brassica napus]	-	-	-	-
MSTRG.71530	--	13.18	13.09	12.37	4.95	4.41	4.77	16.18	13.47	15.72	15.1233	4.71	12.88	1.451333629	8.91E-48	8.34E-46	0.231643566	3.04E-05	0.000934348	unnamed protein product [Brassica napus]	-	-	-	-
MSTRG.71545	At2g03933	11.83	13.59	7.7	28.46	35.18	22.05	5.36	7.35	5.7	6.1367	28.5633	11.04	-1.371424179	0.003937482	0.01754395	-0.847213046	0.077162444	0.449808213	PREDICTED: defensin-like protein 71 [Raphanus sativus]	-	-	-	-
MSTRG.71573	--	0.09	0.14	0	2.65	2.04	2.17	0	0	0	0	2.2867	0.0767	-4.89850281	3.79E-06	3.22E-05	-6.26052755	0.613318757	0.980399641	unnamed protein product [Brassica oleracea]	-	-	-	-
[truncated: 14,600 more rows]
