# Supplementary material for: Effects of Low Nighttime Temperature on Fatty Acid Content in Developing Seeds from Brassica napus L. Based on RNA-Seq and Metabolome
Source: Plants (Basel). 2023 Jan 10;12(2):325. doi: 10.3390/plants12020325 (PMC9862530; doi:10.3390/plants12020325)
Supplement: Supplementary file 1 [file plants-12-00325-s001.zip › Table S6.xls]

Table S6 Analysis of DEGs from STSL in HNT
id	Symbol	OFE18-1	OFE18-2	OFE18-3	OSE18-1	OSE18-2	OSE18-3	OTE18-1	OTE18-2	OTE18-3	OTE18	OSE18	OFE18	OSE18-vs-OFE18-log2fc	OSE18-vs-OFE18-pvalue	OSE18-vs-OFE18-fdr	OFE18-vs-OTE18-log2fc	OFE18-vs-OTE18-pvalue	OFE18-vs-OTE18-fdr	Description	Pathway	GO Component	GO Function	GO Process
MSTRG.10441	At1g61900	1.08	0.47	0.72	0.82	0.94	1.55	2.02	3.41	1.38	2.27	1.1033	0.7567	-0.54413892	0.772244793	0.984859178	1.584962501	0.001269125	0.031165728	uncharacterized GPI-anchored protein At1g61900 isoform X1 [Brassica rapa]	-	GO:0016020//membrane	-	-
MSTRG.10685	PER21	1.7	9.41	14.12	6.63	8.35	0.57	1.11	0.22	1.73	1.02	5.1833	8.41	0.698225626	0.154609148	0.72177971	-3.043536648	0.001474784	0.034777072	peroxidase 21 [Brassica rapa]	ko01100//Metabolic pathways;ko01110//Biosynthesis of secondary metabolites;ko00940//Phenylpropanoid biosynthesis	GO:0044444//cytoplasmic part	GO:0003824//catalytic activity;GO:0016209//antioxidant activity;GO:0043169//cation binding;GO:0046906//tetrapyrrole binding	GO:0006950//response to stress;GO:0009620//response to fungus;GO:0042743//hydrogen peroxide metabolic process;GO:0043436//oxoacid metabolic process;GO:0044272//sulfur compound biosynthetic process;GO:0044711//single-organism biosynthetic process;GO:0044765//single-organism transport;GO:1901576//organic substance biosynthetic process
MSTRG.10948	--	3.67	2.86	3.41	6.82	6.61	5.23	0.41	0	0	0.1367	6.22	3.3133	-0.908631229	0.31009871	0.906615689	-4.599550037	0.000144841	0.006730998	transmembrane protein [Arabidopsis thaliana]	-	-	-	-
MSTRG.10949	--	4.45	6.56	5.37	19.49	31.59	14.33	0.54	0	1.43	0.6567	21.8033	5.46	-1.997575857	0.001034004	0.041789546	-3.055667822	0.00242061	0.048516403	transmembrane protein [Arabidopsis thaliana]	-	-	-	-
MSTRG.11054	--	0	5.92	6.73	0	0.05	0	0	0	3.33	1.11	0.0167	4.2167	7.982993575	3.61E-05	0.003779675	-1.925543303	0.602482032	0.913487456	pumilio-like protein [Arabidopsis thaliana]	-	GO:0043231//intracellular membrane-bounded organelle;GO:0044444//cytoplasmic part	GO:0044822//poly(A) RNA binding	GO:0009117//nucleotide metabolic process;GO:0044249//cellular biosynthetic process;GO:1901576//organic substance biosynthetic process
MSTRG.11098	SPH11	0.96	1.65	1.66	1.99	3.56	1.63	0.13	0	0.15	0.0933	2.3933	1.4233	-0.749747774	0.651588599	0.984859178	-3.930737338	1.60E-05	0.001299243	PREDICTED: pentatricopeptide repeat-containing protein At1g10270-like [Brassica oleracea var. oleracea] [Brassica oleracea]	-	GO:0043231//intracellular membrane-bounded organelle	GO:0005488//binding	GO:0001101//response to acid chemical;GO:0009793//embryo development ending in seed dormancy;GO:0010467//gene expression;GO:0016070//RNA metabolic process;GO:0044763//single-organism cellular process
MSTRG.11262	--	0.73	0.43	0.62	0.62	0.3	0.48	1.06	2.18	1.23	1.49	0.4667	0.5933	0.346450414	0.112469385	0.640786511	1.32839759	0.002265341	0.046519667	BnaA08g12570D [Brassica napus]	-	-	-	-
MSTRG.11300	DGAT3	0.08	1.2	0.96	0.04	0.07	0.04	0.15	0	1.72	0.6233	0.05	0.7467	3.900464326	0.000612266	0.029358372	-0.260460462	0.878581565	0.954396067	diacylglycerol O-acyltransferase 3, cytosolic [Eutrema salsugineum]	ko01100//Metabolic pathways;ko00561//Glycerolipid metabolism	-	-	-
MSTRG.11740	At4g01450	0.73	0.24	0.53	3.64	7.6	1.74	0.1	0.09	0.08	0.09	4.3267	0.5	-3.113255978	0.000105453	0.008424206	-2.473931188	0.004879891	0.076894377	WAT1-related protein At4g01450 [Brassica rapa]	-	-	-	-
MSTRG.12038	FH11	0.24	0.41	0.36	0.82	0.97	0.19	0.02	0.02	0.02	0.02	0.66	0.3367	-0.971145137	0.606629346	0.984859178	-4.073248982	0.000133642	0.006316254	formin-like protein 11 [Brassica rapa]	-	GO:0015629//actin cytoskeleton;GO:0031224//intrinsic component of membrane;GO:0043231//intracellular membrane-bounded organelle	-	GO:0007015//actin filament organization;GO:0048449//floral organ formation
MSTRG.121	DDB_G0269284	3.03	2.16	2.34	3.17	1.76	2.05	5.47	7.87	3.86	5.7333	2.3267	2.51	0.109422828	0.092993082	0.590467565	1.191686795	0.001111133	0.028435575	NKAP family protein UM04995-like [Brassica napus]	-	-	-	-
MSTRG.12490	--	0	0	0	0.58	0.88	0.9	0	0	0.12	0.04	0.7867	0	-9.619608644	7.78E-06	0.001125257	5.321928095	0.466443125	0.84686735	Integrase catalytic core [Arabidopsis suecica]	-	-	-	-
MSTRG.12496	--	0.35	0.23	0.26	5.33	1.11	1.61	0	0	1.05	0.35	2.6833	0.28	-3.26052755	0.000266766	0.016580523	0.321928095	0.846670345	0.939312481	01P13-2 [Brassica rapa subsp. pekinensis] [Brassica rapa]	-	-	-	-
MSTRG.12558	cwc15-a	0.21	3.75	3.15	0	0.05	0.05	0	0.05	4.4	1.4833	0.0333	2.37	6.151777655	9.01E-06	0.001263858	-0.676044224	0.703425688	0.931552167	PREDICTED: protein CWC15 homolog isoform X2 [Raphanus sativus]	ko03040//Spliceosome	GO:0030529//intracellular ribonucleoprotein complex;GO:0043231//intracellular membrane-bounded organelle	-	-
MSTRG.12570	GEK1	0.1	5.33	4.57	0.09	0	0.05	0	0.14	4.06	1.4	0.0467	3.3333	6.158429363	8.35E-06	0.00119151	-1.251538767	0.477244309	0.852083572	sodium/proton antiporter 1-like [Brassica napus]	-	GO:0043231//intracellular membrane-bounded organelle;GO:0044444//cytoplasmic part	GO:0043169//cation binding;GO:0052689//carboxylic ester hydrolase activity	GO:0000302//response to reactive oxygen species;GO:0009642//response to light intensity;GO:0044763//single-organism cellular process
MSTRG.12871	--	0	0.04	0.04	4.11	0.52	0.52	0	0	0.09	0.03	1.7167	0.0267	-6.008428622	5.57E-05	0.005261481	0.169925001	0.992097774	0.997757298	hypothetical protein Bca52824_053923 [Brassica carinata]	-	-	-	-
MSTRG.13028	ASD1	2.77	1.5	2.13	1.4	1.94	2.56	6.08	12.73	3.78	7.53	1.9667	2.1333	0.117356951	0.362600537	0.943283825	1.819540461	0.000469599	0.015798319	alpha-L-arabinofuranosidase 1-like [Abrus precatorius]	ko00520//Amino sugar and nucleotide sugar metabolism	-	-	-
MSTRG.13074	--	1.18	0.7	0.61	1.4	0.74	1.7	2.5	2.95	2.64	2.6967	1.28	0.83	-0.624960569	0.734077503	0.984859178	1.69999396	2.86E-05	0.002008969	BnaA09g03960D [Brassica napus]	-	-	-	-
MSTRG.13201	--	0	3.29	3.73	0	0.07	0	0	0.16	3.28	1.1467	0.0233	2.34	6.647972298	0.00081706	0.035732429	-1.029062466	0.606304092	0.913487456	unnamed protein product [Brassica oleracea]	-	-	-	-
MSTRG.13269	--	0.32	7.03	7.67	2.56	1.06	0.26	0	0.08	0.41	0.1633	1.2933	5.0067	1.952756255	0.013337824	0.215328385	-4.937959253	0.000263694	0.010475955	BnaA09g05740D [Brassica napus]	-	-	-	-
MSTRG.13328	--	0.13	1.74	0.51	0	0	0	0.57	0	1.74	0.77	0	0.7933	9.631783357	0.000294669	0.017789225	-0.043068722	0.988178304	0.996505501	PREDICTED: ABC transporter B family member 1-like [Raphanus sativus]	ko02010//ABC transporters	GO:0005911//cell-cell junction;GO:0016020//membrane	GO:0005515//protein binding;GO:0015562//efflux transmembrane transporter activity;GO:0080161//auxin transmembrane transporter activity	GO:0000904//cell morphogenesis involved in differentiation;GO:0007015//actin filament organization;GO:0009409//response to cold;GO:0009630//gravitropism;GO:0009639//response to red or far red light;GO:0010053//root epidermal cell differentiation;GO:0010928//regulation of auxin mediated signaling pathway;GO:0022610//biological adhesion;GO:0032535//regulation of cellular component size;GO:0043479//…
MSTRG.13440	RABD2B	0.04	2.28	2.16	0	0	0.04	0	0	1.82	0.6067	0.0133	1.4933	6.807354922	4.06E-05	0.004152753	-1.299560282	0.519777029	0.876958066	ras-related protein RIC1 isoform X1 [Triticum aestivum]	-	-	-	-
MSTRG.13549	PDV2	1.56	3.01	3.72	3.52	5.63	0.84	0.4	0.18	0.53	0.37	3.33	2.7633	-0.269112576	0.613419687	0.984859178	-2.900812425	2.07E-05	0.001576455	plastid division protein PDV2 isoform X2 [Brassica rapa]	-	GO:0031355//integral component of plastid outer membrane	GO:0005488//binding	GO:0048285//organelle fission
MSTRG.13940	XCP2	1.92	0.94	1.32	4.72	6.32	3.97	1.94	1.23	1.44	1.5367	5.0033	1.3933	-1.84434913	0.000793089	0.034982543	0.141263808	0.644435408	0.913487456	cysteine protease XCP2-like [Brassica napus]	-	GO:0005773//vacuole;GO:0071944//cell periphery	GO:0016787//hydrolase activity	GO:0012501//programmed cell death;GO:0045491//xylan metabolic process
MSTRG.14148	TPS07	23.06	106.57	124.81	22.37	3.82	3.98	7.88	4.09	105.85	39.2733	10.0567	84.8133	3.07613889	2.89E-06	0.000516837	-1.110741034	0.332647476	0.748591621	Terpenoid cyclases/protein prenyltransferase alpha-alpha toroid [Arabidopsis suecica]	-	GO:0005911//cell-cell junction;GO:0009536//plastid	-	GO:0006714//sesquiterpenoid metabolic process;GO:0046246//terpene biosynthetic process
MSTRG.14150	TPS07	7.86	47.89	53.18	9.98	0.47	0.51	0.97	0.62	38.04	13.21	3.6533	36.31	3.313081633	0.000280238	0.017183562	-1.458736464	0.28144828	0.695807664	Terpenoid cyclases/protein prenyltransferase alpha-alpha toroid [Arabidopsis suecica]	-	GO:0009536//plastid	GO:0016829//lyase activity	GO:0046246//terpene biosynthetic process
MSTRG.14168	TPP2	41.44	27.34	25.61	26.52	20.52	20.77	63.25	114.14	52.77	76.72	22.6033	31.4633	0.477135979	0.000782479	0.034803102	1.285931197	0.000303417	0.011588623	LOW QUALITY PROTEIN: tripeptidyl-peptidase 2-like [Brassica rapa]	-	GO:0005840//ribosome;GO:0009536//plastid;GO:0031090//organelle membrane	GO:0008236//serine-type peptidase activity	GO:0009606//tropism;GO:0019538//protein metabolic process
MSTRG.14487	--	3.05	0.86	0.59	1.49	1.74	4.03	12.21	29.47	10.24	17.3067	2.42	1.5	-0.690044547	0.61982597	0.984859178	3.528293477	1.95E-07	4.14E-05	hypothetical protein N665_0276s0003 [Sinapis alba]	-	-	-	-
MSTRG.14544	--	6.47	24.11	25.99	10.31	5.97	5.1	3.52	2.9	18.83	8.4167	7.1267	18.8567	1.403775318	0.000970092	0.039863605	-1.163753783	0.185740757	0.573115318	PREDICTED: serine/arginine-rich splicing factor RS40-like [Brassica oleracea var. oleracea] [Brassica oleracea]	-	-	-	-
MSTRG.1507	At2g46260	0	2.56	3.92	0.05	0	0	0	0	2.33	0.7767	0.0167	2.16	7.017921908	0.000422008	0.0225262	-1.475663858	0.686720129	0.925224259	BTB/POZ domain-containing protein At2g46260 isoform X1 [Capsella rubella]	-	GO:0043231//intracellular membrane-bounded organelle	GO:0046983//protein dimerization activity	GO:0003002//regionalization;GO:0003006//developmental process involved in reproduction;GO:0009639//response to red or far red light
MSTRG.15146	--	7.4	17.3	14.7	47.47	39.07	11.26	0.44	0	0.64	0.36	32.6	13.1333	-1.311638835	0.231929648	0.835515906	-5.189092412	1.86E-09	8.90E-07	transmembrane protein [Arabidopsis thaliana]	-	-	-	-
MSTRG.15461	--	0	0.07	0	5.63	0.74	2.12	0.07	0	0	0.0233	2.83	0.0233	-6.922265821	0.000119712	0.009283146	0	0.98790717	0.996437868	hypothetical protein IGI04_043092 [Brassica rapa subsp. trilocularis] [Brassica rapa]	-	-	-	-
MSTRG.15529	LCR30	8.96	8.79	6.31	50.35	33.47	18.94	1.59	0.12	0.83	0.8467	34.2533	8.02	-2.094570248	6.94E-06	0.001045189	-3.24373624	7.46E-05	0.00406973	defensin-like protein 122 [Eutrema salsugineum]	-	-	-	-
MSTRG.15530	LCR30	16.7	32.52	28.49	65.4	45.98	30.2	6.23	1.44	4.68	4.1167	47.1933	25.9033	-0.865445314	0.459214763	0.979927365	-2.65358922	7.08E-05	0.003923475	defensin-like protein 122 [Eutrema salsugineum]	-	-	-	-
MSTRG.15549	--	0	0.27	0.28	15.66	3.36	0.84	0	0	0	0	6.62	0.1833	-5.174290194	0.001029023	0.041629274	-7.518325308	0.478051029	0.852083572	-	-	-	-	-
MSTRG.15982	EMB2360	0.36	0.27	0.16	0.56	0.74	1.17	1.39	2.63	1.17	1.73	0.8233	0.2633	-1.644586483	0.074202388	0.534210003	2.71580998	1.04E-06	0.000156545	glutathione reductase, chloroplastic-like isoform X1 [Brassica napus]	ko00480//Glutathione metabolism	GO:0009532//plastid stroma	GO:0000166//nucleotide binding;GO:0015038//glutathione disulfide oxidoreductase activity;GO:0016651//oxidoreductase activity, acting on NAD(P)H;GO:0016723//oxidoreductase activity, oxidizing metal ions, NAD or NADP as acceptor;GO:0032550//purine ribonucleoside binding;GO:0046914//transition metal ion binding;GO:0060089//molecular transducer activity	GO:0006605//protein targeting;GO:0006790//sulfur compound metabolic process;GO:0009404//toxin metabolic process;GO:0009657//plastid organization;GO:0009835//fruit ripening;GO:0019725//cellular homeostasis;GO:0061687//detoxification of inorganic compound
MSTRG.16043	SGR6	1.3	0.89	0.73	1.06	0	0	0	0	0.14	0.0467	0.3533	0.9733	1.461904104	0.177619018	0.762753055	-4.382469637	0.000299379	0.011505609	PREDICTED: protein SHOOT GRAVITROPISM 6 isoform X1 [Raphanus sativus]	-	-	-	-
MSTRG.16065	--	6.01	4.06	4.49	4.98	0.06	0.02	0	0	0.46	0.1533	1.6867	4.8533	1.524801066	1	1	-4.984232684	0.000404043	0.014124617	emb1703 [Arabidopsis thaliana]	-	-	-	-
MSTRG.16076	--	0.64	1.11	0.67	1.18	0.04	0.04	0	0	0	0	0.42	0.8067	0.941583314	0.172841246	0.754879657	-9.655828831	5.78E-06	0.000594792	trafficking protein particle complex subunit 1 [Brassica rapa]	-	GO:0044444//cytoplasmic part	-	GO:0016482//cytoplasmic transport;GO:0042546//cell wall biogenesis;GO:0045491//xylan metabolic process
MSTRG.16180	--	3	0.42	0.31	6.69	0.18	0	0	0	0.06	0.02	2.29	1.2433	-0.881134469	1	1	-5.95806932	0.000173823	0.007744518	BnaC07g04320D [Brassica napus]	-	-	-	-
MSTRG.16361	IBS1	0.08	0.75	0.93	1.01	0.96	0.71	0.04	0	0.02	0.02	0.8933	0.5867	-0.606657572	0.945710009	0.990239699	-4.874469118	0.000429145	0.014769685	LOW QUALITY PROTEIN: protein IMPAIRED IN BABA-INDUCED STERILITY 1 [Brassica rapa]	-	-	GO:0004674//protein serine/threonine kinase activity;GO:0036094//small molecule binding;GO:0097159//organic cyclic compound binding;GO:1901363//heterocyclic compound binding	GO:0006796//phosphate-containing compound metabolic process;GO:0044238//primary metabolic process;GO:0044260//cellular macromolecule metabolic process
MSTRG.16398	YUC10	0.55	2.14	2.36	5.64	0.06	0	0	0	0	0	1.9	1.6833	-0.174678531	0.464840221	0.981955926	-10.71710517	3.46E-05	0.002304257	probable indole-3-pyruvate monooxygenase YUCCA10 [Brassica rapa]	ko01100//Metabolic pathways;ko00380//Tryptophan metabolism	-	GO:0000166//nucleotide binding;GO:0016709//oxidoreductase activity, acting on paired donors, with incorporation or reduction of molecular oxygen, NAD(P)H as one donor, and incorporation of one atom of oxygen	GO:0009653//anatomical structure morphogenesis;GO:0009850//auxin metabolic process;GO:0042743//hydrogen peroxide metabolic process;GO:0044710//single-organism metabolic process
MSTRG.16463	BHLH71	0.02	0.06	0	2.38	3.56	1	0.32	0.19	0.22	0.2433	2.3133	0.0267	-6.438791853	6.71E-09	4.66E-06	3.189824559	0.012880596	0.139355586	PREDICTED: transcription factor bHLH71 [Brassica oleracea var. oleracea] [Brassica oleracea]	-	GO:0043231//intracellular membrane-bounded organelle	GO:0001071//nucleic acid binding transcription factor activity;GO:0003676//nucleic acid binding;GO:0005515//protein binding	GO:0010468//regulation of gene expression;GO:0034645//cellular macromolecule biosynthetic process;GO:0044707//single-multicellular organism process
MSTRG.16565	TPS09	1.53	1.24	0.56	0.13	0.06	0.33	4.21	7.39	4.58	5.3933	0.1733	1.11	2.678938649	0.000502198	0.025480411	2.280617525	3.65E-07	6.77E-05	BnaA08g30440D [Brassica napus]	-	GO:0005911//cell-cell junction;GO:0009536//plastid	GO:0016838//carbon-oxygen lyase activity, acting on phosphates	GO:0006714//sesquiterpenoid metabolic process;GO:0009664//plant-type cell wall organization;GO:0046246//terpene biosynthetic process
MSTRG.16635	--	6.98	3.53	3.96	2.32	3.95	8.06	12.09	12.22	16.53	13.6133	4.7767	4.8233	0.014026312	0.663639982	0.984859178	1.496917944	2.53E-05	0.001832276	hypothetical protein HID58_061944 [Brassica napus]	-	-	-	-
MSTRG.16725	--	0.18	5.56	4.66	0	0	0	0	0.09	11.34	3.81	0	3.4667	11.75933341	2.44E-08	1.26E-05	0.136241875	0.960680836	0.994216048	BnaA01g25150D [Brassica napus]	-	-	-	-
MSTRG.16900	--	0.1	0	0	0.98	1.51	0.58	0.05	0	0	0.0167	1.0233	0.0333	-4.94016675	0.000147965	0.010779897	-1	0.838064864	0.937422789	Retrotransposon gag domain [Arabidopsis suecica]	-	-	-	-
MSTRG.16901	Os02g0301000	0	0.03	0.06	0.85	0.82	0.46	0	0	0.18	0.06	0.71	0.03	-4.564784619	0.000346252	0.019796213	1	0.731041285	0.931552167	zinc finger CCCH domain-containing protein 1 [Eutrema salsugineum]	-	-	-	-
MSTRG.17239	--	2.81	0.66	0.91	6.3	13.05	7.35	5.63	8.97	3.57	6.0567	8.9	1.46	-2.607836967	0.000682844	0.031740843	2.052555645	0.000799787	0.022869094	hypothetical protein IGI04_013067 [Brassica rapa subsp. trilocularis] [Brassica rapa]	-	-	-	-
MSTRG.17314	--	1.74	2.71	2.68	1.05	26.8	5.4	0.21	0.04	0	0.0833	11.0833	2.3767	-2.221380359	0.083876896	0.562444805	-4.833902077	5.25E-07	9.05E-05	Neprosin activation peptide [Arabidopsis thaliana x Arabidopsis arenosa]	-	-	-	-
MSTRG.1760	--	2.56	0.84	1.54	0.98	1.44	0.39	0.37	0.22	0.54	0.3767	0.9367	1.6467	0.813940911	0.031084756	0.345675425	-2.128188269	0.002066871	0.043678448	hypothetical protein BRARA_A01447 [Brassica rapa]	-	-	-	-
MSTRG.17605	--	12.76	3.9	3.14	0.94	0	0.49	0.74	2.03	24.49	9.0867	0.4767	6.6	3.791413378	0.000117925	0.009187988	0.461285132	1	1	hypothetical protein Bca52824_044908 [Brassica carinata]	-	-	-	-
MSTRG.17807	--	1.01	1.24	1	2.8	1.68	0.52	0.14	0.06	0.17	0.1233	1.6667	1.0833	-0.621488377	0.991989119	0.997496091	-3.134842542	5.10E-06	0.000540455	BnaCnng11940D [Brassica napus]	ko01100//Metabolic pathways;ko04145//Phagosome;ko04070//Phosphatidylinositol signaling system;ko00562//Inositol phosphate metabolism	-	-	-
MSTRG.18548	DHDPS2	2.16	1.67	1.31	2.35	2.52	1.91	5.16	9.2	2.67	5.6767	2.26	1.7133	-0.399516914	0.817963995	0.984859178	1.72823817	0.000742298	0.021827333	4-hydroxy-tetrahydrodipicolinate synthase 2, chloroplastic [Brassica rapa]	ko01100//Metabolic pathways;ko01110//Biosynthesis of secondary metabolites;ko01230//Biosynthesis of amino acids;ko00300//Lysine biosynthesis;ko00261//Monobactam biosynthesis	GO:0009536//plastid	GO:0016836//hydro-lyase activity	GO:0006743//ubiquinone metabolic process;GO:0009085//lysine biosynthetic process
MSTRG.18625	LHCB4.3	19.27	27.63	29.1	34.11	37.92	19.94	8.87	4.84	11.02	8.2433	30.6567	25.3333	-0.275163922	0.42036619	0.970293251	-1.619737179	0.000677976	0.020438383	chlorophyll a-b binding protein CP29.3, chloroplastic [Brassica rapa]	ko01100//Metabolic pathways;ko00196//Photosynthesis - antenna proteins	GO:0009521//photosystem;GO:0009526//plastid envelope;GO:0031224//intrinsic component of membrane;GO:0031976//plastid thylakoid;GO:0044434//chloroplast part	GO:0043169//cation binding;GO:0046906//tetrapyrrole binding	GO:0000097//sulfur amino acid biosynthetic process;GO:0006091//generation of precursor metabolites and energy;GO:0009639//response to red or far red light;GO:0009642//response to light intensity;GO:0009725//response to hormone;GO:0016072//rRNA metabolic process;GO:0031399//regulation of protein modification process;GO:0034285//response to disaccharide;GO:0043269//regulation of ion transport
MSTRG.19214	--	2.47	0.53	0.92	0	0	1.37	14.24	6.77	7.43	9.48	0.4567	1.3067	1.516677761	0.401838709	0.960880107	2.858995906	1.57E-05	0.001286534	PREDICTED: cytochrome b561 and DOMON domain-containing protein At3g07570-like [Raphanus sativus]	-	-	-	-
MSTRG.19625	DSC2	0.02	0	0	0.18	0.36	0.19	0.15	0.07	0	0.0733	0.2433	0.0067	-5.189824559	0.000731918	0.033267982	3.459431619	0.147599743	0.515499194	disease resistance protein TAO1-like [Brassica napus]	-	-	-	GO:0009617//response to bacterium
MSTRG.19762	F-ATMBP	868.02	393.26	372.96	283.14	247.73	687.24	1224.84	1750.26	1237.16	1404.0867	406.0367	544.7467	0.423975449	0.275999127	0.877517737	1.36597462	0.000176544	0.007834358	jacalin-related lectin 34 isoform X1 [Brassica rapa]	-	GO:0043231//intracellular membrane-bounded organelle	-	GO:0003006//developmental process involved in reproduction;GO:0006950//response to stress;GO:0044699//single-organism process
MSTRG.19763	JAL5	151.04	65.18	66.39	50.39	45.62	134.01	226.16	305.62	220.64	250.8067	76.6733	94.2033	0.297053208	0.396690725	0.959229483	1.412725682	0.000111568	0.005517861	jacalin-related lectin 34 isoform X2 [Brassica rapa]	-	GO:0005911//cell-cell junction;GO:0043231//intracellular membrane-bounded organelle;GO:0044444//cytoplasmic part	GO:0046914//transition metal ion binding	GO:0001101//response to acid chemical;GO:0006950//response to stress;GO:0007165//signal transduction;GO:0009628//response to abiotic stimulus;GO:0009725//response to hormone;GO:0019759//glycosinolate catabolic process;GO:0044271//cellular nitrogen compound biosynthetic process;GO:0050790//regulation of catalytic activity
MSTRG.20118	NET1A	0.46	0.38	0.36	1.45	1.42	0.39	0.03	0.04	0.13	0.0667	1.0867	0.4	-1.441837559	0.086172788	0.569278847	-2.584962501	0.000359303	0.013053623	protein NETWORKED 1A [Brassica rapa]	-	-	-	-
MSTRG.20735	accB	11.06	17.79	20.45	35.9	33.84	9.46	4.39	1.16	5.68	3.7433	26.4	16.4333	-0.683912784	0.903502292	0.984859178	-2.134229719	0.001656616	0.037506383	biotin carboxyl carrier protein of acetyl-CoA carboxylase [Brassica rapa]	-	GO:0009536//plastid	-	GO:0006873//cellular ion homeostasis;GO:0030001//metal ion transport
MSTRG.21203	--	0	1.08	1.24	0.02	0	0	0	0	1.23	0.41	0.0067	0.7733	6.857980995	0.000531574	0.026544081	-0.91546649	0.806887672	0.931552167	PREDICTED: probable replication factor A 73 kDa subunit [Brassica oleracea var. oleracea] [Brassica oleracea]	ko03420//Nucleotide excision repair;ko03440//Homologous recombination;ko03030//DNA replication;ko03430//Mismatch repair	-	-	-
MSTRG.2126	PORB	9.51	6.62	6.94	27.88	29.99	3.9	0.97	0.36	1.39	0.9067	20.59	7.69	-1.420888327	0.201822353	0.798579998	-3.084339447	4.06E-08	1.15E-05	protochlorophyllide reductase precursor [Arabidopsis thaliana]	ko01100//Metabolic pathways;ko01110//Biosynthesis of secondary metabolites;ko00860//Porphyrin metabolism	GO:0009527//plastid outer membrane;GO:0031976//plastid thylakoid;GO:0044434//chloroplast part	GO:0016628//oxidoreductase activity, acting on the CH-CH group of donors, NAD or NADP as acceptor	GO:0000097//sulfur amino acid biosynthetic process;GO:0005982//starch metabolic process;GO:0006091//generation of precursor metabolites and energy;GO:0006355//regulation of transcription, DNA-templated;GO:0006779//porphyrin-containing compound biosynthetic process;GO:0009725//response to hormone;GO:0009887//organ morphogenesis;GO:0048869//cellular developmental process
MSTRG.21329	--	1.22	12.87	13.33	1.76	1.6	1.96	0.87	0.67	13.4	4.98	1.7733	9.14	2.36573042	0.001113193	0.043827991	-0.876048423	1	1	unnamed protein product, partial [Brassica rapa]	-	-	-	-
MSTRG.21350	--	30.24	81.85	87.59	238.06	95.98	71.35	10.03	2.16	19.09	10.4267	135.13	66.56	-1.021620662	0.501623877	0.984859178	-2.674377422	0.001169977	0.029461453	unnamed protein product [Brassica rapa]	-	-	-	-
MSTRG.21846	At5g67130	1.76	2.61	2.34	9.03	2.39	2.88	0.3	0.33	0.99	0.54	4.7667	2.2367	-1.091630475	0.386005284	0.957765985	-2.050318953	0.001813724	0.039878844	PI-PLC X domain-containing protein At5g67130 isoform X2 [Brassica rapa]	-	GO:0005911//cell-cell junction	GO:0016772//transferase activity, transferring phosphorus-containing groups;GO:0042578//phosphoric ester hydrolase activity	GO:0006796//phosphate-containing compound metabolic process;GO:0044238//primary metabolic process
MSTRG.21863	CDKF-4	0.5	3.03	2.93	0.2	2.89	10.14	7.28	11.14	9.75	9.39	4.41	2.1533	-1.034206992	0.531479882	0.984859178	2.124553494	0.002379462	0.047999927	PREDICTED: cyclin-dependent kinase F-4-like isoform X1 [Brassica oleracea var. oleracea] [Brassica oleracea]	-	GO:0044424//intracellular part	GO:0016772//transferase activity, transferring phosphorus-containing groups	GO:0006417//regulation of translation;GO:0006486//protein glycosylation
MSTRG.22562	--	5.22	0.93	1.17	0.93	0.46	2.32	8.08	11.18	10.9	10.0533	1.2367	2.44	0.980424462	0.235738917	0.837304495	2.042720875	0.001919039	0.041496854	BnaCnng65690D [Brassica napus]	-	-	-	-
MSTRG.22578	--	0.62	1.42	1.94	0.62	0	0	0	0	0.06	0.02	0.2067	1.3267	2.68242831	0.019417659	0.267970231	-6.05166212	0.000138417	0.006502435	signal recognition particle 54 kDa subunit [Arabidopsis thaliana]	-	-	-	-
MSTRG.22582	--	0.04	0	0	0.81	0.38	1.01	0	0.25	0	0.0833	0.7333	0.0133	-5.781359714	0.000137569	0.010217792	2.64385619	0.354983166	0.767381516	U-box domain-containing protein 11 [Senna tora]	-	-	-	-
MSTRG.2260	PSAN	0.09	0.07	0.12	0.6	0.89	0.79	0.13	0	0.07	0.0667	0.76	0.0933	-3.025535092	0.000357002	0.020276761	-0.485426827	0.765922245	0.931552167	BnaA01g17830D [Brassica napus]	-	GO:0009521//photosystem;GO:0031978//plastid thylakoid lumen;GO:0044434//chloroplast part	GO:0003824//catalytic activity;GO:0005515//protein binding;GO:0043167//ion binding	GO:0000097//sulfur amino acid biosynthetic process;GO:0006259//DNA metabolic process;GO:0006739//NADP metabolic process;GO:0009767//photosynthetic electron transport chain;GO:0031399//regulation of protein modification process
MSTRG.22644	--	0.24	0.11	0.16	0.02	0.11	0.13	0.64	0.76	0.64	0.68	0.0867	0.17	0.971985624	0.235392303	0.837304495	2	0.000392481	0.013844934	BnaUnng01230D [Brassica napus]	-	-	-	-
MSTRG.23031	--	0.05	3.87	3.76	0	0	0	0	0	2.6	0.8667	0	2.56	11.32192809	4.03E-06	0.000679457	-1.562594688	0.453826378	0.840388202	bHLH family protein [Brassica oleracea]	-	-	GO:0005488//binding	GO:0010468//regulation of gene expression
MSTRG.23258	LAX2	0.61	1.01	1.08	2.44	1.76	1.33	0.19	0.16	0.11	0.1533	1.8433	0.9	-1.034320073	0.273557589	0.875113466	-2.553253641	0.000336741	0.012496097	PREDICTED: auxin transporter-like protein 2 isoform X1 [Camelina sativa]	ko04075//Plant hormone signal transduction	GO:0016020//membrane	GO:0022857//transmembrane transporter activity	GO:0009653//anatomical structure morphogenesis;GO:0009725//response to hormone;GO:0010051//xylem and phloem pattern formation;GO:0010817//regulation of hormone levels;GO:0016049//cell growth;GO:0046942//carboxylic acid transport;GO:0048509//regulation of meristem development;GO:0048589//developmental growth;GO:0051707//response to other organism;GO:0071704//organic substance metabolic process
MSTRG.23434	--	9.81	15.55	15.07	65.58	58.74	31.88	0.31	0.21	2.83	1.1167	52.0667	13.4767	-1.949896345	7.14E-05	0.006295727	-3.593193203	0.000179167	0.007920481	BnaA06g16030D [Brassica napus]	-	-	-	-
MSTRG.23435	--	2.24	3.44	5.48	17.03	17.71	5.55	0.24	0	0.23	0.1567	13.43	3.72	-1.852084778	0.030048502	0.340492614	-4.56953246	2.13E-05	0.001612619	BnaA06g16040D [Brassica napus]	-	-	-	-
MSTRG.23502	--	0.05	0	0	0.17	0.46	0.83	0.45	1.42	0.22	0.6967	0.4867	0.0167	-4.867896464	0.009296204	0.173679283	5.385431037	0.001100212	0.028239747	hypothetical protein F2Q68_00002376 [Brassica cretica]	-	-	-	-
MSTRG.23783	--	1.21	0.12	0.02	8.92	0.28	0.06	0	0	0	0	3.0867	0.45	-2.778052786	1	1	-8.813781191	0.001988718	0.042547282	PREDICTED: uncharacterized RING finger protein C4G3.12c [Brassica oleracea var. oleracea] [Brassica oleracea]	-	-	-	GO:0006950//response to stress;GO:0009987//cellular process
MSTRG.23887	--	0.03	0.65	0.44	0.01	0.01	0	0.01	0.01	0.63	0.2167	0.0067	0.3733	5.807354922	2.29E-05	0.002647001	-0.784987109	0.618729134	0.913487456	hypothetical protein F2Q69_00010082 [Brassica cretica]	-	-	-	-
MSTRG.23898	--	1.71	7.13	7.17	6.42	7.98	1.5	0.08	0.12	0.57	0.2567	5.3	5.3367	0.009946542	0.377162271	0.954106559	-4.377971052	1.95E-06	0.000256832	protein IQ-DOMAIN 1-like [Brassica napus]	-	GO:0043231//intracellular membrane-bounded organelle	-	GO:0009886//post-embryonic morphogenesis
MSTRG.24056	--	0.17	7.65	9.04	0.18	0.03	0.16	0	0.13	5.45	1.86	0.1233	5.62	5.509935455	1.28E-06	0.000274592	-1.595267509	0.490166467	0.85356177	BnaA02g19210D [Brassica napus]	ko03420//Nucleotide excision repair;ko03440//Homologous recombination;ko03030//DNA replication;ko03430//Mismatch repair	-	-	-
MSTRG.2445	AtMg01250	0.05	1.67	1.56	0.02	0	0.07	0	0.02	1.04	0.3533	0.03	1.0933	5.187627003	0.000164329	0.011672749	-1.62963155	0.358371588	0.770464726	Ribonuclease H-like superfamily [Arabidopsis suecica]	-	-	-	-
MSTRG.24523	At3g51370	0.74	3.11	3.14	4.68	0.37	0.09	0.03	0.03	0.09	0.05	1.7133	2.33	0.443524096	1	1	-5.54225805	6.64E-08	1.69E-05	probable protein phosphatase 2C 46 [Eutrema salsugineum]	-	GO:0016020//membrane	GO:0004721//phosphoprotein phosphatase activity	-
MSTRG.24591	SNL5	0.13	0.4	0.42	0.17	1.23	1.52	0.02	0.04	0	0.02	0.9733	0.3167	-1.619968951	0.205130987	0.80439545	-3.984893108	0.002373745	0.047938754	paired amphipathic helix protein Sin3-like 5 isoform X2 [Capsella rubella]	-	-	-	GO:0010467//gene expression
MSTRG.2468	--	4.45	10.42	11.23	2.51	1.15	2.26	3.07	5.12	12.91	7.0333	1.9733	8.7	2.140380726	8.92E-06	0.001252452	-0.306806808	0.66226223	0.913487456	glucosidase 2 subunit beta-like [Brassica napus]	-	-	-	-
MSTRG.2486	DXS	2.04	3	1.83	6.23	6.79	1.85	0.42	0.18	0.72	0.44	4.9567	2.29	-1.114022643	0.291889172	0.891580992	-2.379772169	0.000156895	0.007153808	PREDICTED: 1-deoxy-D-xylulose-5-phosphate synthase, chloroplastic [Brassica oleracea var. oleracea] [Brassica oleracea]	ko01100//Metabolic pathways;ko01110//Biosynthesis of secondary metabolites;ko00900//Terpenoid backbone biosynthesis;ko00730//Thiamine metabolism	GO:0009532//plastid stroma	GO:0016744//transferase activity, transferring aldehyde or ketonic groups;GO:0043169//cation binding	GO:0000097//sulfur amino acid biosynthetic process;GO:0006090//pyruvate metabolic process;GO:0006355//regulation of transcription, DNA-templated;GO:0006468//protein phosphorylation;GO:0006544//glycine metabolic process;GO:0006633//fatty acid biosynthetic process;GO:0006732//coenzyme metabolic process;GO:0006753//nucleoside phosphate metabolic process;GO:0006772//thiamine metabolic process;GO:0006…
MSTRG.25421	BGLU3	1.38	3.88	4.08	0.23	0.76	0.79	0.71	0.45	2.95	1.37	0.5933	3.1133	2.391545309	0.000529044	0.026449937	-1.184284156	0.187818049	0.576891644	PREDICTED: beta-glucosidase 3-like isoform X4 [Brassica oleracea var. oleracea] [Brassica oleracea]	ko01100//Metabolic pathways;ko01110//Biosynthesis of secondary metabolites;ko00940//Phenylpropanoid biosynthesis;ko00500//Starch and sucrose metabolism;ko00460//Cyanoamino acid metabolism	GO:0043231//intracellular membrane-bounded organelle	GO:0016798//hydrolase activity, acting on glycosyl bonds	GO:0009608//response to symbiont;GO:0009812//flavonoid metabolic process
MSTRG.25558	RCF3	2.99	4.37	4.37	3.2	2.48	3.32	7.25	9.99	7.12	8.12	3	3.91	0.382206107	0.044226939	0.413571574	1.05431112	0.00144927	0.034348582	KH domain-containing protein At4g18375 isoform X1 [Brassica rapa]	-	GO:0043231//intracellular membrane-bounded organelle	-	GO:0001101//response to acid chemical
MSTRG.2572	--	0.03	1.15	0.76	0	0	0	0	0	0.64	0.2133	0	0.6467	9.336878436	0.000130066	0.009816947	-1.599912842	0.426264623	0.823161189	heavy metal-associated isoprenylated plant protein 26-like [Brassica napus]	-	-	-	-
MSTRG.25796	GLC1	4.39	5.67	4.82	276.97	23.36	9.02	0.47	0.16	1.17	0.6	103.1167	4.96	-4.377793602	0.000250308	0.015772697	-3.047305715	3.45E-05	0.002304257	PREDICTED: major pollen allergen Ole e 10-like [Brassica oleracea var. oleracea] [Brassica oleracea]	-	GO:0005911//cell-cell junction;GO:0030312//external encapsulating structure	GO:0016798//hydrolase activity, acting on glycosyl bonds	GO:0010243//response to organonitrogen compound
MSTRG.2673	PPP6R3	0.02	0.77	1.05	0	0	0.02	0.07	0	1.02	0.3633	0.0067	0.6133	6.523561956	0.000204468	0.013694017	-0.755377631	0.667015353	0.914583443	BnaCnng15910D [Brassica napus]	-	-	-	-
MSTRG.26905	At2g39490	2.21	0.3	0.52	0.28	0	0.29	3.86	8.08	3.56	5.1667	0.19	1.01	2.410283969	0.035969486	0.371855416	2.354878517	0.001356596	0.032714409	BnaA07g10640D [Brassica napus]	-	-	-	-
MSTRG.27078	HOS15	1.28	0.86	0.52	0.79	0.07	2.08	4.5	5.39	1.71	3.8667	0.98	0.8867	-0.144389909	0.922168568	0.98513621	2.124626655	0.001088338	0.028046089	LOW QUALITY PROTEIN: WD40 repeat-containing protein HOS15 [Brassica napus]	-	GO:0031461//cullin-RING ubiquitin ligase complex;GO:0043231//intracellular membrane-bounded organelle	-	GO:0000338//protein deneddylation;GO:0006355//regulation of transcription, DNA-templated;GO:0006402//mRNA catabolic process;GO:0006950//response to stress;GO:0009639//response to red or far red light;GO:0016458//gene silencing;GO:0032446//protein modification by small protein conjugation;GO:0034968//histone lysine methylation
MSTRG.27519	GATA8	0.67	1.75	2.2	2.94	3.04	0.69	0.27	0.03	0.15	0.15	2.2233	1.54	-0.52979391	0.875114098	0.984859178	-3.359895945	0.000320595	0.012099966	GATA transcription factor 8 [Brassica rapa]	-	GO:0043231//intracellular membrane-bounded organelle	GO:0003677//DNA binding;GO:0046914//transition metal ion binding	GO:0006355//regulation of transcription, DNA-templated;GO:0044707//single-multicellular organism process;GO:0048511//rhythmic process
MSTRG.27600	LCR52	3.18	4.66	4.35	4.77	6.36	9.59	0.76	0	0.32	0.36	6.9067	4.0633	-0.765325877	0.538857997	0.984859178	-3.496594908	0.000395518	0.013914193	BnaCnng13530D [Brassica napus]	-	-	-	-
MSTRG.27855	--	0	0	0	1.02	0.35	0.21	0	0.83	0.23	0.3533	0.5267	0	-9.040746342	6.01E-06	0.000923258	8.464886049	0.0048464	0.076574174	PREDICTED: sister chromatid cohesion 1 protein 2 isoform X1 [Raphanus sativus]	-	-	-	GO:0000280//nuclear division;GO:0006259//DNA metabolic process;GO:0010468//regulation of gene expression;GO:0022402//cell cycle process;GO:0034645//cellular macromolecule biosynthetic process;GO:0044710//single-organism metabolic process;GO:0050794//regulation of cellular process;GO:0050896//response to stimulus
MSTRG.27869	--	5.73	8.12	3.01	14.85	11.44	5.14	0	0	0	0	10.4767	5.62	-0.898537736	0.555730897	0.984859178	-12.45635442	3.02E-07	5.81E-05	hypothetical protein BRARA_G02139 [Brassica rapa]	-	-	-	-
MSTRG.2788	--	0	0.19	0.5	127.09	7.27	1.77	0.3	0	0	0.1	45.3767	0.23	-7.624172962	2.95E-06	0.000524725	-1.201633861	0.688583703	0.926487923	BnaA06g16030D [Brassica napus]	-	-	-	-
MSTRG.28006	CLPB1	1.24	0.46	0.42	1.91	0.92	1.4	2.86	4.76	2.15	3.2567	1.41	0.7067	-0.996593399	0.338668521	0.926355196	2.204294297	2.65E-05	0.001898886	PREDICTED: chaperone protein ClpB1-like [Brassica oleracea var. oleracea] [Brassica oleracea]	-	GO:0009526//plastid envelope;GO:0009532//plastid stroma	GO:0017111//nucleoside-triphosphatase activity;GO:0032550//purine ribonucleoside binding	GO:0000302//response to reactive oxygen species;GO:0006417//regulation of translation;GO:0009408//response to heat;GO:0009642//response to light intensity;GO:0033554//cellular response to stress
MSTRG.28086	PATL1	0	0	0.03	0.86	0.4	0.18	0	0	0	0	0.48	0.01	-5.584962501	0.001130527	0.044329592	-3.321928095	0.825445526	0.931552167	patellin-1-like [Brassica napus]	-	GO:0005576//extracellular region;GO:0005911//cell-cell junction;GO:0009536//plastid;GO:0031224//intrinsic component of membrane	GO:0019899//enzyme binding	GO:0000904//cell morphogenesis involved in differentiation;GO:0006090//pyruvate metabolic process;GO:0006970//response to osmotic stress;GO:0006996//organelle organization;GO:0010038//response to metal ion;GO:0042044//fluid transport;GO:0048588//developmental cell growth
MSTRG.28101	CYP709B1	19.97	16.75	16.12	44.64	43.22	28.89	28.1	11.72	27.08	22.3	38.9167	17.6133	-1.143720178	0.000455417	0.023756869	0.340375744	0.34593465	0.759971213	LOW QUALITY PROTEIN: cytochrome P450 709B1 [Brassica rapa]	-	-	GO:0016491//oxidoreductase activity;GO:0046906//tetrapyrrole binding;GO:0046914//transition metal ion binding	GO:0044710//single-organism metabolic process
MSTRG.28113	At1g71691	3.81	9.21	8.61	24.79	23.61	2.63	1.16	0.22	0.79	0.7233	17.01	7.21	-1.238311976	0.450180798	0.979771144	-3.317266718	7.10E-06	0.00069408	GDSL esterase/lipase At1g71691 [Brassica rapa]	-	-	GO:0016788//hydrolase activity, acting on ester bonds	GO:0006629//lipid metabolic process
MSTRG.28454	--	3.79	5.01	4.66	14.72	12.68	6.85	0.54	0.12	1.35	0.67	11.4167	4.4867	-1.347425578	0.015879391	0.238877736	-2.743411003	0.000846728	0.023671541	BnaCnng55650D [Brassica napus]	-	-	-	-
MSTRG.28721	--	0.06	0	0	4.31	1.78	0.82	0.45	0.06	0	0.17	2.3033	0.02	-6.8475794	1.81E-05	0.002206604	3.087462841	0.25447255	0.665385854	-	-	-	-	-
MSTRG.29116	AFP2	16.96	1.82	2.85	0.65	0.08	2.51	40.14	87.55	73.48	67.0567	1.08	7.21	2.738967947	0.016996381	0.24721507	3.217309605	2.31E-05	0.001712869	PREDICTED: defensin-like protein 1 [Brassica oleracea var. oleracea] [Brassica oleracea]	ko04016//MAPK signaling pathway - plant	GO:0030312//external encapsulating structure	-	GO:0000160//phosphorelay signal transduction system;GO:0001906//cell killing;GO:0009611//response to wounding;GO:0009620//response to fungus;GO:0009685//gibberellin metabolic process;GO:0010476//gibberellin mediated signaling pathway;GO:0042742//defense response to bacterium
MSTRG.29117	ARAC5	0.92	0.75	0.42	0.31	0.57	0.28	1.96	4.12	4.47	3.5167	0.3867	0.6967	0.849378137	0.062428834	0.493502123	2.335668152	1.83E-05	0.00143069	rac-like GTP-binding protein ARAC5 [Brassica rapa]	ko04145//Phagosome	GO:0015630//microtubule cytoskeleton;GO:0016020//membrane;GO:0043231//intracellular membrane-bounded organelle;GO:0044444//cytoplasmic part	GO:0004620//phospholipase activity;GO:0017111//nucleoside-triphosphatase activity;GO:0019900//kinase binding;GO:0032550//purine ribonucleoside binding	GO:0000097//sulfur amino acid biosynthetic process;GO:0000904//cell morphogenesis involved in differentiation;GO:0005976//polysaccharide metabolic process;GO:0007017//microtubule-based process;GO:0008380//RNA splicing;GO:0009826//unidimensional cell growth;GO:0030036//actin cytoskeleton organization;GO:0035556//intracellular signal transduction;GO:0043479//pigment accumulation in tissues in respo…
MSTRG.29156	--	0	0.23	0.29	3.16	4.03	0.98	0	0	0.15	0.05	2.7233	0.1733	-3.97375255	0.001049989	0.042248289	-1.793549123	0.513683398	0.872714402	LOW QUALITY PROTEIN: protein indeterminate-domain 6, chloroplastic-like [Brassica rapa]	-	-	-	-
MSTRG.29257	APXT	2.46	1.19	1.28	5.42	2.42	3.35	3.13	3.81	3.52	3.4867	3.73	1.6433	-1.182550485	0.136633146	0.69042399	1.0852233	0.00221774	0.04593697	L-ascorbate peroxidase T, chloroplastic [Brassica rapa]	ko00480//Glutathione metabolism;ko00053//Ascorbate and aldarate metabolism	GO:0031224//intrinsic component of membrane;GO:0031976//plastid thylakoid;GO:0044434//chloroplast part	GO:0004601//peroxidase activity;GO:0043169//cation binding;GO:0046906//tetrapyrrole binding	GO:0007165//signal transduction;GO:0009409//response to cold;GO:0009668//plastid membrane organization;GO:0042743//hydrogen peroxide metabolic process;GO:0044710//single-organism metabolic process
MSTRG.2987	--	0.93	1.06	1.01	0.45	7.1	2.32	3.43	6.49	2.59	4.17	3.29	1	-1.718087584	0.170953613	0.751798202	2.060047384	1.55E-05	0.001274802	unnamed protein product [Brassica napus]	-	-	-	-
MSTRG.30134	--	0	2.26	2.6	0	0	0	0	0	3.12	1.04	0	1.62	10.6617781	0.000336894	0.019492093	-0.639410285	0.861625632	0.947012285	unnamed protein product, partial [Brassica rapa]	ko03050//Proteasome	-	-	-
MSTRG.30262	OEP162	1.17	0.33	0.35	0.5	0.08	1.96	2.38	3.4	2.97	2.9167	0.8467	0.6167	-0.457303226	0.829866691	0.984859178	2.241757746	0.000113031	0.005573448	PREDICTED: outer envelope pore protein 16-2, chloroplastic isoform X1 [Raphanus sativus]	-	GO:0031355//integral component of plastid outer membrane	GO:0008320//protein transmembrane transporter activity;GO:0022829//wide pore channel activity;GO:0046943//carboxylic acid transmembrane transporter activity	GO:0015031//protein transport
MSTRG.30274	NAP1;2	0.04	12.4	15.02	0	0.03	0.07	0	0	5.18	1.7267	0.0333	9.1533	8.101187815	3.30E-07	9.37E-05	-2.406307622	0.457743562	0.843281971	nucleosome assembly protein 1;2 isoform X2 [Brassica rapa]	-	GO:0016020//membrane;GO:0043231//intracellular membrane-bounded organelle;GO:0044444//cytoplasmic part	GO:0005515//protein binding	GO:0006310//DNA recombination;GO:0009292//genetic transfer;GO:0010038//response to metal ion;GO:0034728//nucleosome organization
MSTRG.30835	--	0	13.72	12.74	0.02	0	0	0	0.03	12.47	4.1667	0.0067	8.82	10.36959735	0.000960041	0.039659953	-1.081884967	1	1	short-chain dehydrogenase/reductase family 42E member 1 isoform X3 [Brassica rapa]	-	-	-	-
MSTRG.30977	REM17	0.79	1.83	1.64	2.08	4.51	0.62	0.11	0.03	0.19	0.11	2.4033	1.42	-0.759145829	0.829422696	0.984859178	-3.690315501	1.16E-05	0.001014114	BnaA08g12400D [Brassica napus]	-	-	-	-
MSTRG.30990	--	0.21	0.16	0.29	4.35	0.41	0.27	0.03	0	0	0.01	1.6767	0.22	-2.93002047	0.027028667	0.320218478	-4.459431619	0.001601194	0.036649207	BnaA07g03900D [Brassica napus]	-	-	-	-
MSTRG.31069	XTH24	0.23	0	0	2.52	2.31	1.4	0	0	0	0	2.0767	0.0767	-4.759526397	0.000108503	0.008617557	-6.26052755	0.488544667	0.852226486	xyloglucan endotransglucosylase/hydrolase protein 24 [Brassica rapa]	-	GO:0005576//extracellular region;GO:0005618//cell wall;GO:0009536//plastid;GO:0016020//membrane	GO:0016758//transferase activity, transferring hexosyl groups;GO:0016787//hydrolase activity	GO:0006950//response to stress;GO:0009605//response to external stimulus;GO:0009827//plant-type cell wall modification;GO:0010243//response to organonitrogen compound;GO:0010476//gibberellin mediated signaling pathway;GO:0044042//glucan metabolic process;GO:0044767//single-organism developmental process
MSTRG.31258	--	1.36	16.87	12.73	0.41	0.23	0.24	0.06	0.19	0	0.0833	0.2933	10.32	5.136758138	1.89E-09	1.59E-06	-6.952333566	1.76E-08	5.72E-06	transmembrane protein [Arabidopsis thaliana]	-	-	-	-
MSTRG.3190	--	0.96	1.12	0.61	0	0.11	1.55	3.7	5.19	1.72	3.5367	0.5533	0.8967	0.696422931	0.593462936	0.984859178	1.979746578	0.000800223	0.022873143	unnamed protein product [Brassica napus]	-	-	-	-
MSTRG.31930	--	5.57	6.28	6.24	7.34	12.64	9.38	10.26	18.28	10.23	12.9233	9.7867	6.03	-0.69865956	0.546795249	0.984859178	1.099748327	0.000913712	0.024943256	BnaCnng69530D [Brassica napus]	-	-	-	-
MSTRG.31946	--	0.04	1.12	1.85	0.03	0.07	0	0	0	0.21	0.07	0.0333	1.0033	4.911691582	0.000466776	0.024146082	-3.841302254	0.035208262	0.245018616	BnaC02g31260D [Brassica napus]	-	-	-	-
MSTRG.3256	BGLU19	111.71	57.58	54.91	22.18	0.09	10.69	310.14	351.45	627.92	429.8367	10.9867	74.7333	2.765998131	0.005156106	0.120729783	2.523964778	1.19E-09	6.16E-07	beta-glucosidase 19 isoform X1 [Brassica napus]	ko01100//Metabolic pathways;ko01110//Biosynthesis of secondary metabolites;ko00940//Phenylpropanoid biosynthesis;ko00500//Starch and sucrose metabolism;ko00460//Cyanoamino acid metabolism	GO:0005911//cell-cell junction;GO:0009526//plastid envelope;GO:0042579//microbody;GO:0044432//endoplasmic reticulum part	GO:0005543//phospholipid binding;GO:0008422//beta-glucosidase activity;GO:0016791//phosphatase activity;GO:0019899//enzyme binding;GO:0046914//transition metal ion binding;GO:0046983//protein dimerization activity	GO:0000003//reproduction;GO:0006091//generation of precursor metabolites and energy;GO:0006470//protein dephosphorylation;GO:0006568//tryptophan metabolic process;GO:0006605//protein targeting;GO:0006714//sesquiterpenoid metabolic process;GO:0006873//cellular ion homeostasis;GO:0006996//organelle organization;GO:0009267//cellular response to starvation;GO:0009409//response to cold;GO:0009608//res…
MSTRG.3270	--	0	0.26	0.05	0	0.66	0.33	1.35	3.74	0.38	1.8233	0.33	0.1033	-1.67516031	0.629713799	0.984859178	4.141200712	0.002044576	0.043360507	BnaA01g25320D [Brassica napus]	-	-	-	-
MSTRG.32913	PIP1.4	13.29	20.96	19.75	38.02	43.19	7.5	5.28	3.2	4.47	4.3167	29.57	18	-0.716137337	0.888306521	0.984859178	-2.060007309	1.08E-06	0.000161572	aquaporin PIP1-3 isoform X2 [Brassica napus]	-	-	-	-
MSTRG.33292	--	1.96	5.13	3.78	169.8	16.66	5.57	0.23	0	0.23	0.1533	64.01	3.6233	-4.142907869	0.001110675	0.043827991	-4.562574269	2.76E-05	0.001947229	Defensin-like (DEFL) family protein [Arabidopsis thaliana]	-	-	-	-
MSTRG.33344	--	34.35	32.54	29.5	77.62	45.8	35.5	3.09	0.56	3.65	2.4333	52.9733	32.13	-0.721345312	0.503509018	0.984859178	-3.722915112	2.25E-08	6.83E-06	unnamed protein product [Brassica napus]	-	-	-	-
MSTRG.33389	LCR50	0	0	0	9.57	0.53	0.34	0.12	0	0	0.04	3.48	0	-11.76487159	0.001294494	0.048455339	5.321928095	0.801923917	0.931552167	BnaC03g66980D [Brassica napus]	-	-	-	-
MSTRG.3369	BHLH87	0.4	2.21	2.69	0.43	0.28	0.1	0.22	0.18	3.31	1.2367	0.27	1.7667	2.709998547	0.000491405	0.025087929	-0.514573173	0.687422338	0.925739249	BnaC03g74660D [Brassica napus]	-	GO:0043231//intracellular membrane-bounded organelle;GO:0044444//cytoplasmic part	GO:0001071//nucleic acid binding transcription factor activity;GO:0003676//nucleic acid binding;GO:0004866//endopeptidase inhibitor activity;GO:0005515//protein binding;GO:0046914//transition metal ion binding	GO:0006970//response to osmotic stress;GO:0010468//regulation of gene expression;GO:0031323//regulation of cellular metabolic process;GO:0034645//cellular macromolecule biosynthetic process;GO:0080090//regulation of primary metabolic process
MSTRG.33874	--	1.62	6.39	5.59	135.83	8.16	3.64	1.06	0.16	0.32	0.5133	49.21	4.5333	-3.440307366	1	1	-3.142604395	0.001097856	0.028207209	Reverse transcriptase RNA-dependent DNA polymerase [Arabidopsis suecica]	-	-	-	-
MSTRG.34046	ALDH2B4	4.39	1.97	1.52	3.11	3.68	3	8.44	13.56	5.58	9.1933	3.2633	2.6267	-0.31311323	0.799359825	0.984859178	1.807354922	0.000276351	0.010823924	aldehyde dehydrogenase family 2 member B4, mitochondrial-like [Carya illinoinensis]	ko01100//Metabolic pathways;ko01110//Biosynthesis of secondary metabolites;ko00010//Glycolysis / Gluconeogenesis;ko00620//Pyruvate metabolism;ko00561//Glycerolipid metabolism;ko00380//Tryptophan metabolism;ko00330//Arginine and proline metabolism;ko00053//Ascorbate and aldarate metabolism;ko00071//Fatty acid degradation;ko00280//Valine, leucine and isoleucine degradation;ko00410//beta-Alanine met…	-	GO:0016491//oxidoreductase activity	GO:0044237//cellular metabolic process
MSTRG.34230	IQM2	2.67	5.56	6.4	1.74	0.43	0.51	0.74	0.42	2.04	1.0667	0.8933	4.8767	2.448624864	1.12E-06	0.000248276	-2.192785959	0.002809128	0.053846462	IQ domain-containing protein IQM2-like [Brassica napus]	-	-	-	-
MSTRG.3455	--	0	2.1	3.31	0.06	0	0	0	0	2.39	0.7967	0.02	1.8033	6.494522283	0.001084447	0.043127157	-1.178617976	0.618617381	0.913487456	BnaUnng03620D [Brassica napus]	-	-	-	-
MSTRG.3474	TDR	0.7	1.33	1.01	2.28	2.93	0.48	0.25	0.03	0.19	0.1567	1.8967	1.0133	-0.904357329	0.663791694	0.984859178	-2.693338662	0.001080308	0.027913163	leucine-rich repeat receptor-like protein kinase TDR [Brassica rapa]	-	GO:0031224//intrinsic component of membrane	GO:0004672//protein kinase activity;GO:0016491//oxidoreductase activity;GO:0032550//purine ribonucleoside binding	GO:0001763//morphogenesis of a branching structure;GO:0006464//cellular protein modification process;GO:0006796//phosphate-containing compound metabolic process;GO:0009799//specification of symmetry;GO:0009933//meristem structural organization;GO:0009943//adaxial/abaxial axis specification;GO:0010065//primary meristem tissue development;GO:0010087//phloem or xylem histogenesis;GO:0044763//single-…
MSTRG.34833	MYB101	2.38	3.39	2.71	4.19	3.27	5.32	0.94	0.17	0.62	0.5767	4.26	2.8267	-0.591751666	0.730423806	0.984859178	-2.293292227	0.001244141	0.030697636	BnaA04g18810D [Brassica napus]	ko04626//Plant-pathogen interaction	GO:0042995//cell projection;GO:0043231//intracellular membrane-bounded organelle	GO:0001071//nucleic acid binding transcription factor activity;GO:0003676//nucleic acid binding	GO:0006355//regulation of transcription, DNA-templated;GO:0009685//gibberellin metabolic process;GO:0009787//regulation of abscisic acid-activated signaling pathway;GO:0010476//gibberellin mediated signaling pathway;GO:0012501//programmed cell death;GO:0048229//gametophyte development
MSTRG.35057	At5g46871	6.16	5.18	2.95	28.92	34.7	13.16	2.28	0	0	0.76	25.5933	4.7633	-2.425724644	2.04E-05	0.002434332	-2.647900187	0.115518115	0.455833644	defensin-like protein 308 [Brassica rapa]	-	-	-	GO:0001906//cell killing;GO:0009620//response to fungus
MSTRG.35060	JMJ706	0.72	0.84	0.59	1.7	1.3	1.06	0.22	0.12	0.18	0.1733	1.3533	0.7167	-0.917143068	0.258330355	0.860134062	-2.047753131	0.000277591	0.01084355	lysine-specific demethylase JMJ706 [Brassica rapa]	-	-	-	-
MSTRG.35063	At5g46871	11.09	27.52	27.16	110.01	156.58	38.87	0.45	0.09	0.09	0.21	101.82	21.9233	-2.215481896	0.005660567	0.128574159	-6.705934031	2.55E-15	4.96E-12	BnaA08g04760D [Brassica napus]	-	-	-	GO:0001906//cell killing;GO:0009620//response to fungus
MSTRG.35132	ALA9	1.05	2.1	2.93	6.12	9.01	2.04	0.4	0.05	0.39	0.28	5.7233	2.0267	-1.497746811	0.172255377	0.754151122	-2.855610091	0.001667085	0.037666625	HAD-like superfamily [Arabidopsis thaliana x Arabidopsis arenosa]	-	GO:0009526//plastid envelope;GO:0016020//membrane	GO:0042625//ATPase coupled ion transmembrane transporter activity;GO:0046872//metal ion binding	GO:0015914//phospholipid transport
MSTRG.35167	--	7.78	2.59	3.13	2.88	1.91	4.52	12.09	21.27	8.64	14	3.1033	4.5	0.536106334	0.189934785	0.780741498	1.637429921	0.001791718	0.039506717	hypothetical protein F2Q69_00057623 [Brassica cretica]	-	-	-	-
MSTRG.35206	RE2	0.03	0.17	0.34	5.46	1.87	1.6	0	0.05	0.55	0.2	2.9767	0.18	-4.047628863	9.02E-05	0.007537812	0.152003093	0.915978916	0.972468774	01P13-1 [Brassica rapa subsp. pekinensis] [Brassica rapa]	-	-	-	-
MSTRG.35387	--	2.94	1.35	1.22	6.6	1.16	0.59	0.28	0.59	0.49	0.4533	2.7833	1.8367	-0.599723879	0.937153164	0.989199843	-2.018445667	0.000473477	0.015873831	BnaAnng22330D [Brassica napus]	-	-	-	-
MSTRG.35403	PRS2	1.42	0.72	0.89	1.57	0.74	2.46	3.5	3.35	2.76	3.2033	1.59	1.01	-0.654671473	0.651686977	0.984859178	1.665218637	1.49E-06	0.000206648	PREDICTED: ribose-phosphate pyrophosphokinase 2, chloroplastic [Brassica oleracea var. oleracea] [Brassica oleracea]	ko01100//Metabolic pathways;ko01110//Biosynthesis of secondary metabolites;ko01200//Carbon metabolism;ko01230//Biosynthesis of amino acids;ko00230//Purine metabolism;ko00030//Pentose phosphate pathway	GO:0009536//plastid	GO:0016778//diphosphotransferase activity;GO:0032550//purine ribonucleoside binding;GO:0046872//metal ion binding	GO:0006464//cellular protein modification process;GO:0006779//porphyrin-containing compound biosynthetic process;GO:0009117//nucleotide metabolic process;GO:0009124//nucleoside monophosphate biosynthetic process
MSTRG.35439	--	0.85	0.55	0.8	1.52	1.31	2.52	2.37	5.46	2.16	3.33	1.7833	0.7333	-1.282035368	0.215172958	0.81717516	2.182981154	0.000385785	0.013714495	BnaCnng61270D, partial [Brassica napus]	-	-	-	-
MSTRG.35631	--	3.9	2.22	3.47	0.51	2.1	7.95	10.26	12.16	4.87	9.0967	3.52	3.1967	-0.139007114	0.952082116	0.991124514	1.508769674	0.001271421	0.031192553	hypothetical protein BRARA_I02820 [Brassica rapa]	-	-	-	-
MSTRG.35632	--	1.11	0.42	0.49	0.63	0.42	1.52	3.14	2.38	1.85	2.4567	0.8567	0.6733	-0.347413066	0.964449054	0.993487272	1.867309326	0.001154274	0.029184177	hypothetical protein IGI04_036545 [Brassica rapa subsp. trilocularis] [Brassica rapa]	-	-	-	-
MSTRG.357	--	3.8	4.13	3.9	16.42	16.58	10.89	4.73	4.65	2.71	4.03	14.63	3.9433	-1.891442197	1.41E-08	8.14E-06	0.031364171	0.838391349	0.937422789	hypothetical protein BRARA_A00205 [Brassica rapa]	-	-	-	-
MSTRG.36139	Os05g0583200	0.07	0.22	0.11	0.43	0.53	0.78	0.65	0.82	0.43	0.6333	0.58	0.1333	-2.121015401	0.04425447	0.413621494	2.247927513	0.002185109	0.04542398	zinc finger BED domain-containing protein RICESLEEPER 2-like [Brassica napus]	-	-	-	-
MSTRG.36291	GATA8	3.78	5.08	5.96	10.31	9.51	3.81	1.89	1.29	1.61	1.5967	7.8767	4.94	-0.673074182	0.831373572	0.984859178	-1.629447887	0.000117308	0.00575053	GATA transcription factor 8 isoform X2 [Brassica rapa]	-	GO:0043231//intracellular membrane-bounded organelle	GO:0003677//DNA binding;GO:0046914//transition metal ion binding	GO:0006355//regulation of transcription, DNA-templated;GO:0044707//single-multicellular organism process;GO:0048511//rhythmic process
MSTRG.36353	GLC1	1.75	0.64	0.3	1.55	1.07	1.12	4.89	7.66	3.24	5.2633	1.2467	0.8967	-0.475432097	0.964994869	0.993534075	2.553333093	8.17E-05	0.004344302	PREDICTED: glucan endo-1,3-beta-glucosidase-like isoform X1 [Brassica oleracea var. oleracea] [Brassica oleracea]	-	GO:0005911//cell-cell junction;GO:0030312//external encapsulating structure	GO:0004553//hydrolase activity, hydrolyzing O-glycosyl compounds	GO:0010243//response to organonitrogen compound;GO:0044238//primary metabolic process
MSTRG.36461	--	0.05	0.43	0.25	0	0.85	2.87	1.58	3.34	1.34	2.0867	1.24	0.2433	-2.349334252	0.203937553	0.802130911	3.100194288	0.000286412	0.011133818	BnaCnng72340D, partial [Brassica napus]	-	-	-	-
MSTRG.36604	--	0.17	0.07	0.23	0.07	1.33	0.62	0.44	1.4	1	0.9467	0.6733	0.1567	-2.103622631	0.169117757	0.748230249	2.595158268	0.002016579	0.042860291	BnaC02g31260D [Brassica napus]	ko03420//Nucleotide excision repair;ko03440//Homologous recombination;ko03030//DNA replication;ko03430//Mismatch repair	-	-	-
MSTRG.36738	--	0.41	0	0	2.31	4.48	2.66	0.13	0.39	0	0.1733	3.15	0.1367	-4.526618514	0.001263478	0.047660445	0.342887714	0.870166595	0.950841779	S locus-related glycoprotein 1 (SLR1) binding pollen coat protein family [Arabidopsis thaliana]	-	-	-	-
MSTRG.36775	CAMTA2	0.11	8.5	9.49	0.3	0.03	0	0	0.06	22.08	7.38	0.11	6.0333	5.777379863	7.84E-06	0.001131027	0.290665525	1	1	BnaC05g31640D [Brassica napus]	-	GO:0043231//intracellular membrane-bounded organelle	GO:0005515//protein binding	GO:0006355//regulation of transcription, DNA-templated;GO:0009409//response to cold
MSTRG.37139	REM13	1.04	5.2	4.62	2.62	2.87	1.18	0.49	0.16	0.75	0.4667	2.2233	3.62	0.703265437	0.055031913	0.462648147	-2.955525371	0.000416437	0.01444745	PREDICTED: B3 domain-containing protein REM13-like isoform X2 [Brassica oleracea var. oleracea] [Brassica oleracea]	-	-	-	-
MSTRG.37257	--	0	1.99	2.44	0	0.03	0	0	0.07	2.11	0.7267	0.01	1.4767	7.206200388	0.000224944	0.014646769	-1.022978564	0.61213215	0.913487456	hypothetical protein HID58_013036 [Brassica napus]	-	-	-	-
MSTRG.37274	DTX46	0	1.71	2.2	0.05	0	0	0.16	0	1.3	0.4867	0.0167	1.3033	6.289096702	0.000993538	0.040634506	-1.421200238	0.463073061	0.845733644	LOW QUALITY PROTEIN: protein DETOXIFICATION 46, chloroplastic [Brassica rapa]	-	GO:0031224//intrinsic component of membrane	GO:0015291//secondary active transmembrane transporter activity	GO:0044763//single-organism cellular process
MSTRG.37903	SPH5	0.57	0.28	0.5	3.63	9.76	2.04	0	0	0	0	5.1433	0.45	-3.51470675	0.000133145	0.009984988	-8.813781191	0.010867698	0.125677658	BnaC05g23870D [Brassica napus]	-	-	-	-
MSTRG.37911	--	0.21	0.26	0.22	1.77	1.13	0.73	0.04	0	0.12	0.0533	1.21	0.23	-2.395301281	2.16E-06	0.000405732	-2.108524457	0.077992537	0.372215605	hypothetical protein IGI04_043103 [Brassica rapa subsp. trilocularis] [Brassica rapa]	-	-	-	-
MSTRG.37921	RE2	0	0	0	3.04	0.3	0.55	0	0	0	0	1.2967	0	-10.34059194	3.96E-05	0.004063779	0	1	1	BnaUnng05000D, partial [Brassica napus]	-	-	-	-
MSTRG.38159	NET3A	0.3	0.49	0.37	0.31	0.09	0.05	1.53	1.79	2.28	1.8667	0.15	0.3867	1.366127899	0.050253298	0.442740938	2.271302022	5.10E-05	0.003092289	protein NETWORKED 3A isoform X2 [Brassica rapa]	-	-	-	-
MSTRG.38682	SCRM	0	2.61	3.25	0.04	0	0	0	0.08	0.99	0.3567	0.0133	1.9533	7.194756854	0.000199931	0.013467108	-2.453289868	0.199383745	0.593628924	PREDICTED: transcription factor ICE1-like isoform X2 [Camelina sativa]	-	GO:0043231//intracellular membrane-bounded organelle	GO:0001071//nucleic acid binding transcription factor activity;GO:0003676//nucleic acid binding	GO:0000338//protein deneddylation;GO:0003006//developmental process involved in reproduction;GO:0006355//regulation of transcription, DNA-templated;GO:0009409//response to cold;GO:0009639//response to red or far red light;GO:0009756//carbohydrate mediated signaling;GO:0010374//stomatal complex development;GO:0016570//histone modification;GO:0032446//protein modification by small protein conjugati…
MSTRG.38811	--	28.25	18.3	19.56	25.06	24.3	45.95	37.79	54.41	47.8	46.6667	31.77	22.0367	-0.527759076	0.745856032	0.984859178	1.082486407	1.17E-05	0.001022374	BnaC05g00740D [Brassica napus]	-	GO:0042579//microbody	-	GO:0000302//response to reactive oxygen species;GO:0043094//cellular metabolic compound salvage;GO:0051707//response to other organism
MSTRG.39112	--	0.07	0.07	0	6.17	0.56	1.67	0	0.07	0.56	0.21	2.8	0.0467	-5.906890596	0.000237745	0.015226644	2.169925001	0.34284955	0.757244015	Integrase catalytic core [Arabidopsis suecica]	-	-	-	-
MSTRG.39113	--	0	0	0	1.02	0.25	0.27	0	0	0	0	0.5133	0	-9.003752135	0.000478842	0.024615044	0	1	1	BnaA02g21650D [Brassica napus]	-	-	-	-
MSTRG.39159	At5g56590	0.45	2.3	2.08	1.06	1.93	0.44	0.11	0.06	0.3	0.1567	1.1433	1.61	0.493814613	0.171817047	0.753347899	-3.361290527	0.000472725	0.015855473	glucan endo-1,3-beta-glucosidase 13 [Brassica rapa]	-	GO:0005618//cell wall;GO:0031225//anchored component of membrane;GO:0043232//intracellular non-membrane-bounded organelle	GO:0004672//protein kinase activity;GO:0008092//cytoskeletal protein binding;GO:0008422//beta-glucosidase activity;GO:0032550//purine ribonucleoside binding	GO:0003006//developmental process involved in reproduction;GO:0006305//DNA alkylation;GO:0006342//chromatin silencing;GO:0006950//response to stress;GO:0007017//microtubule-based process;GO:0008283//cell proliferation;GO:0009887//organ morphogenesis;GO:0034968//histone lysine methylation;GO:0045229//external encapsulating structure organization;GO:0048580//regulation of post-embryonic development…
MSTRG.39237	AHA3	2.45	1.78	1.18	4.44	0.47	0.2	0.3	0.36	0.65	0.4367	1.7033	1.8033	0.082305303	0.390829377	0.958291179	-2.046061782	5.55E-05	0.003277001	ATPase 3, plasma membrane-type [Brassica rapa]	ko00190//Oxidative phosphorylation	GO:0005911//cell-cell junction;GO:0031090//organelle membrane;GO:0031224//intrinsic component of membrane;GO:0043231//intracellular membrane-bounded organelle;GO:0044444//cytoplasmic part	GO:0008324//cation transmembrane transporter activity;GO:0015662//ATPase activity, coupled to transmembrane movement of ions, phosphorylative mechanism;GO:0032550//purine ribonucleoside binding;GO:0046872//metal ion binding	GO:0001101//response to acid chemical;GO:0006464//cellular protein modification process;GO:0006865//amino acid transport;GO:0006950//response to stress;GO:0009152//purine ribonucleotide biosynthetic process;GO:0009664//plant-type cell wall organization;GO:0010383//cell wall polysaccharide metabolic process;GO:0015698//inorganic anion transport;GO:0015833//peptide transport;GO:0015988//energy coup…
MSTRG.39445	OVA6	0.81	0.56	0.55	0.48	0.36	0.8	3.16	3.89	2.98	3.3433	0.5467	0.64	0.227410496	0.388275403	0.958031466	2.38514339	3.40E-09	1.44E-06	proline--tRNA ligase, chloroplastic/mitochondrial isoform X2 [Brassica napus]	ko00970//Aminoacyl-tRNA biosynthesis	GO:0009532//plastid stroma	GO:0004812//aminoacyl-tRNA ligase activity;GO:0032550//purine ribonucleoside binding	GO:0003006//developmental process involved in reproduction;GO:0006418//tRNA aminoacylation for protein translation;GO:0009668//plastid membrane organization;GO:0009791//post-embryonic development;GO:0015979//photosynthesis;GO:0048229//gametophyte development
MSTRG.39913	DTX25	7.39	25.23	28.27	3.05	4.55	5.18	5.58	1.29	4.83	3.9	4.26	20.2967	2.252317477	3.60E-05	0.003778686	-2.379696783	0.001783319	0.039376624	protein DETOXIFICATION 25 isoform X1 [Brassica rapa]	-	GO:0016020//membrane	GO:0022857//transmembrane transporter activity	-
MSTRG.40007	--	1.04	0.33	0.27	0.42	0.12	0.52	2.45	5.16	2.21	3.2733	0.3533	0.5467	0.62963155	0.273178074	0.874862077	2.58202721	3.29E-05	0.002229879	multidrug resistance protein 2 isoform X1 [Brassica rapa]	-	GO:0031224//intrinsic component of membrane	GO:0042895//antibiotic transporter activity	GO:0044763//single-organism cellular process;GO:0045491//xylan metabolic process
MSTRG.40627	--	2.11	12.38	9.39	112.34	14.72	6.91	0.21	0	0.41	0.2067	44.6567	7.96	-2.488035231	0.085294014	0.566515174	-5.267390811	2.13E-06	0.000274527	defensin-like protein 112 [Capsella rubella]	-	-	-	-
MSTRG.40649	--	0.69	1.32	1.08	21.46	2.61	0.63	0.2	0	0.05	0.0833	8.2333	1.03	-2.998832299	0.033320746	0.357035427	-3.627606838	0.001685191	0.037887368	unnamed protein product [Brassica napus]	-	-	-	-
MSTRG.4091	--	17.17	22.31	20.97	18.79	19.27	16.85	8.57	1.63	3.63	4.61	18.3033	20.15	0.138673428	0.036619397	0.375231234	-2.127941183	0.001744691	0.038842789	BnaC05g01130D [Brassica napus]	-	-	-	-
MSTRG.41112	--	5.37	7.93	7.61	2.85	3.06	3.58	7.96	8.95	10.71	9.2067	3.1633	6.97	1.13971307	0.000309582	0.018405111	0.401520258	0.215461581	0.614604269	PREDICTED: cysteine-rich and transmembrane domain-containing protein A [Brassica oleracea var. oleracea] [Brassica oleracea]	-	GO:0016020//membrane	-	GO:0006605//protein targeting;GO:0009891//positive regulation of biosynthetic process;GO:0043067//regulation of programmed cell death
MSTRG.41223	At5g40670	0.04	5.15	5.57	0	0	0	0	0	5.04	1.68	0	3.5867	11.80842796	8.42E-07	0.000194671	-1.094182439	1	1	BnaCnng25090D [Brassica napus]	-	GO:0005774//vacuolar membrane;GO:0009536//plastid;GO:0031224//intrinsic component of membrane	-	GO:0051234//establishment of localization
MSTRG.41324	ER-ANT1	0.4	0.39	0.47	0.71	0	0	0	0	0	0	0.2367	0.42	0.827532804	0.348686305	0.933498304	-8.714245518	0.000173338	0.007731794	ADP,ATP carrier protein ER-ANT1-like isoform X2 [Brassica napus]	-	GO:0009526//plastid envelope;GO:0019866//organelle inner membrane;GO:0031224//intrinsic component of membrane	GO:0005347//ATP transmembrane transporter activity	GO:0009791//post-embryonic development;GO:0009814//defense response, incompatible interaction;GO:0015711//organic anion transport;GO:0015865//purine nucleotide transport;GO:0033554//cellular response to stress;GO:0044763//single-organism cellular process
MSTRG.41404	PGD1	2.05	1.22	1.19	2.94	0	0	0	0.04	0	0.0133	0.98	1.4867	0.601227555	1	1	-6.8008999	8.46E-08	2.10E-05	BnaA09g11480D [Brassica napus]	ko01100//Metabolic pathways;ko01110//Biosynthesis of secondary metabolites;ko01200//Carbon metabolism;ko00480//Glutathione metabolism;ko00030//Pentose phosphate pathway	GO:0009532//plastid stroma	GO:0000166//nucleotide binding;GO:0016616//oxidoreductase activity, acting on the CH-OH group of donors, NAD or NADP as acceptor;GO:0048037//cofactor binding	GO:0006739//NADP metabolic process;GO:0006970//response to osmotic stress;GO:0009664//plant-type cell wall organization;GO:0010383//cell wall polysaccharide metabolic process;GO:0019520//aldonic acid metabolic process
MSTRG.41410	--	2.57	1.91	3.14	1.58	0.29	0	0.09	0	0.22	0.1033	0.6233	2.54	2.026752728	0.012776731	0.209732161	-4.619450877	1.03E-07	2.44E-05	unnamed protein product [Brassica napus]	-	-	-	-
MSTRG.41528	--	2.58	1.71	1.7	9.17	0.52	0.14	0.09	0.21	0.34	0.2133	3.2767	1.9967	-0.714635414	1	1	-3.226412193	8.06E-08	2.01E-05	BnaCnng70710D [Brassica napus]	-	-	-	-
MSTRG.41857	PSD1	1.64	1.17	1.27	4.01	5.2	2.87	0.75	0.57	1.15	0.8233	4.0267	1.36	-1.565979397	0.001073047	0.042880389	-0.72405811	0.191630479	0.582184943	PREDICTED: phosphatidylserine decarboxylase proenzyme 1, mitochondrial [Brassica oleracea var. oleracea] [Brassica oleracea]	ko01100//Metabolic pathways;ko01110//Biosynthesis of secondary metabolites;ko00564//Glycerophospholipid metabolism	-	-	-
MSTRG.42030	At5g46871	0.08	25.47	21.55	0.07	0.74	0.71	0.07	0	0.71	0.26	0.5067	15.7	4.953583831	0.000225888	0.014674548	-5.916109126	0.000358614	0.013040751	BnaA08g04760D [Brassica napus]	-	-	-	GO:0001906//cell killing;GO:0009620//response to fungus
MSTRG.42091	--	1.51	4.98	5.39	12.36	6.15	3.54	0.25	0	0.49	0.2467	7.35	3.96	-0.89224382	0.700843234	0.984859178	-4.004865755	0.000191803	0.008316041	BnaC06g06660D [Brassica napus]	-	-	-	-
MSTRG.42106	--	1.57	1	0.96	9.2	1.46	0.7	0.36	0.26	0.19	0.27	3.7867	1.1767	-1.686222746	0.247865005	0.84916804	-2.12367437	0.000479897	0.016033749	hypothetical protein IGI04_037398 [Brassica rapa subsp. trilocularis] [Brassica rapa]	-	-	-	-
MSTRG.42706	CRK11	0.19	0.64	1.09	1.54	0.64	0.18	0.03	0	0	0.01	0.7867	0.64	-0.297680549	0.658837199	0.984859178	-6	0.000242075	0.00988479	cysteine-rich receptor-like protein kinase 11 isoform X4 [Brassica rapa]	-	-	-	-
MSTRG.42807	SMC5	0.07	3.81	3.95	0.08	0.03	0.07	0	0.04	3.42	1.1533	0.06	2.61	5.442943496	1.88E-07	6.21E-05	-1.17824027	1	1	PREDICTED: structural maintenance of chromosomes protein 5 isoform X2 [Brassica oleracea var. oleracea] [Brassica oleracea]	-	GO:0005911//cell-cell junction;GO:0043231//intracellular membrane-bounded organelle;GO:0043234//protein complex	GO:0032550//purine ribonucleoside binding	GO:0002252//immune effector process;GO:0006259//DNA metabolic process;GO:0007059//chromosome segregation;GO:0030422//production of siRNA involved in RNA interference
MSTRG.42910	LCR30	9.3	19.81	20.06	48.54	23.4	17.52	2.92	0.94	2.5	2.12	29.82	16.39	-0.863464403	0.603779132	0.984859178	-2.950679685	5.80E-06	0.000594792	defensin-like protein 122 [Eutrema salsugineum]	-	-	-	-
MSTRG.4304	--	25.84	29.55	23.5	295.3	93.03	48.05	5.45	0.34	3.14	2.9767	145.46	26.2967	-2.467670639	0.001176477	0.045636733	-3.143110357	0.000247566	0.010032106	BnaC01g38920D [Brassica napus]	-	-	-	-
MSTRG.43327	DXS	1.1	3.61	3.63	2.6	3.29	0.85	0.6	0.22	0.89	0.57	2.2467	2.78	0.307298792	0.153957122	0.720932705	-2.286051059	0.002286438	0.046779925	PREDICTED: 1-deoxy-D-xylulose-5-phosphate synthase, chloroplastic [Brassica oleracea var. oleracea] [Brassica oleracea]	ko01100//Metabolic pathways;ko01110//Biosynthesis of secondary metabolites;ko00900//Terpenoid backbone biosynthesis;ko00730//Thiamine metabolism	GO:0009532//plastid stroma	GO:0016744//transferase activity, transferring aldehyde or ketonic groups;GO:0043169//cation binding	GO:0000097//sulfur amino acid biosynthetic process;GO:0006090//pyruvate metabolic process;GO:0006355//regulation of transcription, DNA-templated;GO:0006468//protein phosphorylation;GO:0006544//glycine metabolic process;GO:0006633//fatty acid biosynthetic process;GO:0006732//coenzyme metabolic process;GO:0006753//nucleoside phosphate metabolic process;GO:0006772//thiamine metabolic process;GO:0006…
MSTRG.43511	--	0.23	18.27	20.91	0.35	0.11	0.17	0.13	0.09	27.16	9.1267	0.21	13.1367	5.967066111	1.06E-07	3.99E-05	-0.525439303	0.817621925	0.931552167	hypothetical protein F2Q68_00000811 [Brassica cretica]	-	-	-	-
MSTRG.43530	DGAT3	0	1.69	1.82	0.04	0	0	0	0.04	1.81	0.6167	0.0133	1.17	6.45532722	0.000869833	0.037149263	-0.92394576	0.651944484	0.913487456	diacylglycerol O-acyltransferase 3 [Brassica rapa]	ko01100//Metabolic pathways;ko00561//Glycerolipid metabolism	-	-	-
MSTRG.43543	--	0.13	0	0	0.1	0.17	0.67	0.58	3.05	2.09	1.9067	0.3133	0.0433	-2.854149134	0.192218061	0.784754359	5.459431619	0.00025495	0.01025432	BnaC01g42150D [Brassica napus]	-	-	-	-
MSTRG.43544	--	6.16	1.49	2.14	1.49	1.26	4.37	12.7	16.5	19.57	16.2567	2.3733	3.2633	0.459431619	0.390687144	0.958291179	2.316613207	1.16E-05	0.001014773	Transposon En/Spm-like [Arabidopsis thaliana x Arabidopsis arenosa]	-	-	-	-
MSTRG.43584	--	0.73	0.24	0.06	0.06	0	0.19	2.36	1.61	3.04	2.3367	0.0833	0.3433	2.042644337	0.163019295	0.738282837	2.766770107	0.000808013	0.023036517	BnaC09g52420D [Brassica napus]	ko03420//Nucleotide excision repair;ko03440//Homologous recombination;ko03030//DNA replication;ko03430//Mismatch repair	-	-	-
MSTRG.43682	--	2.9	2.41	2.19	11.04	10.02	5.41	1.24	1.68	1.55	1.49	8.8233	2.5	-1.819395694	5.15E-06	0.000822593	-0.746615764	0.037993889	0.255254142	unnamed protein product [Brassica napus]	-	-	-	-
MSTRG.43691	--	0.18	4.51	4.67	0.32	0	0.16	0	0	3.89	1.2967	0.16	3.12	4.285402219	0.000753951	0.03409944	-1.266738375	0.529679197	0.882659299	hypothetical protein F2Q70_00044942 [Brassica cretica]	-	-	-	-
MSTRG.43733	--	0.47	5.61	5.44	0.62	0.34	0.47	0.3	0.18	7.29	2.59	0.4767	3.84	3.010053665	8.17E-05	0.00701072	-0.568154213	1	1	BnaC02g24850D [Brassica napus]	-	-	-	-
MSTRG.43813	--	0.17	0.07	0.11	2.11	10.48	0.48	0.3	0.5	0.11	0.3033	4.3567	0.1167	-5.222760409	2.76E-05	0.003103261	1.378511623	0.168032882	0.547437668	BnaC07g00050D [Brassica napus]	-	-	-	-
MSTRG.44080	--	7.09	12.84	14.89	3.72	4.78	5.23	8.22	4.31	17.37	9.9667	4.5767	11.6067	1.342584578	0.000291124	0.01770056	-0.219770719	0.767272782	0.931552167	probable serine/threonine-protein kinase At1g09600, partial [Brassica napus]	-	-	-	-
MSTRG.44173	--	0.44	0.44	1.91	2.45	1.78	1.49	0.03	0	0	0.01	1.9067	0.93	-1.035750025	0.498027744	0.984859178	-6.539158811	4.41E-09	1.80E-06	B-box zinc finger protein 18 [Brassica napus]	-	-	-	-
MSTRG.44234	CKL7	3.84	8.3	8.64	10.13	13.6	6.06	1.02	1.55	2.44	1.67	9.93	6.9267	-0.519632469	0.936100217	0.988941997	-2.052313146	0.000206319	0.008808721	casein kinase 1-like protein 7 isoform X2 [Brassica rapa]	-	-	GO:0004672//protein kinase activity	GO:0006796//phosphate-containing compound metabolic process
MSTRG.44416	--	0.03	3.52	3.91	0.03	0.03	0	0	0	4.34	1.4467	0.02	2.4867	6.95806932	4.12E-06	0.00068793	-0.781480588	1	1	PREDICTED: kanadaptin-like [Nicotiana tabacum]	-	-	-	-
MSTRG.44532	At5g41720	0	1.29	1.26	0	0	0	0	0	0.24	0.08	0	0.85	9.731319031	0.000731077	0.033248218	-3.409390936	0.123099203	0.471318512	LOW QUALITY PROTEIN: F-box protein At5g07610 [Arabidopsis lyrata subsp. lyrata] [Arabidopsis lyrata]	-	-	-	-
MSTRG.44541	WRKY19	0.37	1.76	2.06	0.24	0.11	0.15	0.18	0.22	2.41	0.9367	0.1667	1.3967	3.066950244	7.54E-06	0.001098352	-0.576380113	0.603906148	0.913487456	WRKY transcription factor [Arabidopsis thaliana]	-	-	-	-
MSTRG.44557	--	0.05	0.98	1.03	0	0	0	0	0	0.92	0.3067	0	0.6867	9.423466121	0.000664527	0.031083119	-1.162938571	0.56213046	0.887793569	PREDICTED: protein PHYTOCHROME KINASE SUBSTRATE 3-like [Camelina sativa]	-	GO:0005911//cell-cell junction;GO:0016020//membrane	-	-
MSTRG.44567	--	0.06	17.11	20.12	0.05	0	0.05	0	0.11	28.04	9.3833	0.0333	12.43	8.542644987	2.13E-07	6.82E-05	-0.405653875	0.880253644	0.955424823	BnaA06g13120D [Brassica napus]	-	-	-	-
MSTRG.44570	RLM1A	0.01	1.04	1.04	0.03	0.03	0.07	0.04	0.03	2.09	0.72	0.0433	0.6967	4.006919414	0.000714263	0.032898748	0.04752837	1	1	disease resistance protein RML1A [Brassica napus]	-	GO:0043231//intracellular membrane-bounded organelle	GO:0032550//purine ribonucleoside binding	GO:0006950//response to stress;GO:0050794//regulation of cellular process
MSTRG.4473	SH3P3	0.11	0.02	0	0.41	1.31	0.77	0.53	0.56	0.34	0.4767	0.83	0.0433	-4.259562214	0.000692416	0.032112989	3.459431619	0.000992236	0.026346778	SH3 domain-containing protein 3 [Eutrema salsugineum]	ko00910//Nitrogen metabolism	GO:0009536//plastid	GO:0016836//hydro-lyase activity;GO:0046914//transition metal ion binding	GO:0044699//single-organism process
MSTRG.45432	LCR62	1.31	6.24	4.99	20.14	9.18	6.17	0.23	0.34	0.55	0.3733	11.83	4.18	-1.500875226	0.217451373	0.820359729	-3.484966711	0.000202531	0.008689923	low-molecular-weight cysteine-rich 60 [Arabidopsis lyrata subsp. lyrata] [Arabidopsis lyrata]	-	-	-	-
MSTRG.45478	RH46	3.53	11.29	9.89	8.53	12.66	2.42	0.89	0.66	2.07	1.2067	7.87	8.2367	0.065696969	0.300898211	0.901200742	-2.771033408	4.22E-05	0.002661767	PREDICTED: DEAD-box ATP-dependent RNA helicase 46 [Brassica oleracea var. oleracea] [Brassica oleracea]	ko03040//Spliceosome	GO:0043231//intracellular membrane-bounded organelle	GO:0003676//nucleic acid binding;GO:0003724//RNA helicase activity;GO:0032550//purine ribonucleoside binding;GO:0042623//ATPase activity, coupled	GO:0016072//rRNA metabolic process;GO:0071555//cell wall organization
MSTRG.45799	--	0.17	0	0	0.46	0	0.08	1.07	1.57	0.8	1.1467	0.18	0.0567	-1.667424661	0.710803637	0.984859178	4.338801913	0.001667621	0.037667784	hypoxia-inducible factor 1-alpha inhibitor-like [Brassica napus]	-	GO:0043231//intracellular membrane-bounded organelle	-	GO:0010468//regulation of gene expression
MSTRG.46021	At5g65490	1.09	0.79	0.45	0	0	0	10.68	7.17	4.43	7.4267	0	0.7767	9.601151739	4.02E-05	0.004117792	3.257347373	1.23E-08	4.28E-06	PREDICTED: protein ecdysoneless homolog [Brassica oleracea var. oleracea] [Brassica oleracea]	-	GO:0009536//plastid	GO:0005488//binding;GO:0016740//transferase activity	GO:0006464//cellular protein modification process
MSTRG.4639	--	2.96	1.58	1.59	1.59	1.45	2.31	4.65	7.63	3.91	5.3967	1.7833	2.0433	0.196348182	0.260306853	0.862366423	1.401144007	0.000421744	0.014574972	BnaC06g13970D [Brassica napus]	-	-	-	-
MSTRG.46641	--	1.11	0.27	0	11.02	8.26	4.31	0.1	0	0.09	0.0633	7.8633	0.46	-4.095435246	0.000126542	0.009632268	-2.860596943	0.214777983	0.613887131	hypothetical protein HID58_046753 [Brassica napus]	-	-	-	-
MSTRG.46972	--	0.39	0.2	0.23	0.14	0	0	0	0	0	0	0.0467	0.2733	2.550197083	0.030913871	0.344423086	-8.094517599	0.001477849	0.034817682	U-box domain-containing protein 14-like isoform X2 [Brassica napus]	-	-	GO:0003824//catalytic activity	-
MSTRG.47005	CYP71B2	0.29	1.51	1.35	0	0	0	0	0	0.75	0.25	0	1.05	10.03617361	4.72E-07	0.000120687	-2.070389328	0.250819206	0.660708146	PREDICTED: cytochrome P450 71B2-like isoform X1 [Brassica oleracea var. oleracea] [Brassica oleracea]	-	-	-	-
MSTRG.47177	PEX4	0.37	0.23	0.14	0	0.5	2.48	2.39	7.57	0.94	3.6333	0.9933	0.2467	-2.009715155	0.235125807	0.837268969	3.880659054	6.66E-06	0.000661862	pollen-specific leucine-rich repeat extensin-like protein 3 [Brassica rapa]	-	-	-	-
MSTRG.47403	--	0.18	0	0	0.06	2.57	1.56	1.56	3.17	0.59	1.7733	1.3967	0.06	-4.540881432	0.02243045	0.289258316	4.885357434	0.000312665	0.011875311	PREDICTED: lipase-like [Brassica oleracea var. oleracea] [Brassica oleracea]	-	-	-	-
MSTRG.47438	Os01g0518400	0.11	0	0	0	0.38	0.39	0.93	3.03	0.34	1.4333	0.2567	0.0367	-2.807354922	0.265974794	0.867367575	5.288761231	0.000145236	0.006734203	Reverse transcriptase zinc-binding domain, partial [Arabidopsis thaliana x Arabidopsis arenosa]	-	-	-	-
MSTRG.47615	SNL1	0.22	0.07	0.21	0.07	2.16	1.03	0.77	1.42	1.23	1.14	1.0867	0.1667	-2.704871964	0.092514108	0.588779695	2.773996325	0.001645449	0.03734055	paired amphipathic helix protein Sin3-like 1 [Arabidopsis lyrata subsp. lyrata] [Arabidopsis lyrata]	-	-	-	-
MSTRG.47725	RPS6	0.41	0.69	0.68	4.73	1.44	0.44	0.06	0.14	0.16	0.12	2.2033	0.5933	-1.892773031	0.13915806	0.694561338	-2.30580843	0.001716125	0.03838423	30S ribosomal protein S6 alpha, chloroplastic isoform X1 [Coffea arabica]	ko03010//Ribosome	GO:0030529//intracellular ribonucleoprotein complex;GO:0044434//chloroplast part	GO:0005198//structural molecule activity;GO:0008135//translation factor activity, RNA binding	GO:0009668//plastid membrane organization;GO:0010467//gene expression;GO:0022613//ribonucleoprotein complex biogenesis;GO:0034645//cellular macromolecule biosynthetic process
MSTRG.47726	--	1.07	0.07	0.07	0.99	7.96	4.59	4.65	5.49	4.42	4.8533	4.5133	0.4033	-3.484148786	0.007344797	0.150009753	3.588931403	0.000115297	0.005662643	protein WEAK CHLOROPLAST MOVEMENT UNDER BLUE LIGHT-like 2 [Brassica rapa]	ko01100//Metabolic pathways;ko01110//Biosynthesis of secondary metabolites;ko00010//Glycolysis / Gluconeogenesis;ko00620//Pyruvate metabolism;ko00561//Glycerolipid metabolism;ko00380//Tryptophan metabolism;ko00330//Arginine and proline metabolism;ko00053//Ascorbate and aldarate metabolism;ko00071//Fatty acid degradation;ko00280//Valine, leucine and isoleucine degradation;ko00410//beta-Alanine met…	-	-	-
MSTRG.47882	--	1.09	1.52	1.55	0.07	6.01	6.61	4.33	6.28	2.48	4.3633	4.23	1.3867	-1.609036636	0.282076086	0.883552658	1.653809664	0.000728882	0.021567913	BnaC02g29680D [Brassica napus]	ko03015//mRNA surveillance pathway	-	-	-
MSTRG.47887	SRP-54C	2.74	2.09	2.74	4.06	4.53	3.65	4.68	6.98	5.52	5.7267	4.08	2.5233	-0.693238353	0.494042948	0.984859178	1.182364831	8.51E-05	0.004481181	Signal recognition particle SRP54 subunit GTPase domain [Arabidopsis suecica]	ko03060//Protein export	GO:0048500//signal recognition particle	GO:0003723//RNA binding;GO:0032550//purine ribonucleoside binding	GO:0002252//immune effector process;GO:0006613//cotranslational protein targeting to membrane;GO:0030422//production of siRNA involved in RNA interference;GO:0043623//cellular protein complex assembly
MSTRG.47919	--	0.85	3.17	3.98	0.41	0.51	0.8	0.66	0.48	1.78	0.9733	0.5733	2.6667	2.217591435	0.000237535	0.015225096	-1.454031631	0.042742078	0.271581261	Helitron helicase-like domain [Arabidopsis suecica]	-	-	-	-
MSTRG.48018	NUC	0.1	0.04	0	0.31	0.18	0.51	1	0.63	0.23	0.62	0.3333	0.0467	-2.836501268	0.055266759	0.463420156	3.731803889	0.000924918	0.025143215	Zinc finger C2H2 superfamily [Arabidopsis suecica]	-	GO:0043231//intracellular membrane-bounded organelle	GO:0001071//nucleic acid binding transcription factor activity;GO:0003676//nucleic acid binding;GO:0046914//transition metal ion binding	GO:0000041//transition metal ion transport;GO:0001101//response to acid chemical;GO:0006355//regulation of transcription, DNA-templated;GO:0007568//aging;GO:0009267//cellular response to starvation;GO:0009648//photoperiodism;GO:0015698//inorganic anion transport;GO:0048506//regulation of timing of meristematic phase transition
MSTRG.48113	--	0.18	1.87	2.53	0	0	0.06	0	0	2.87	0.9567	0.02	1.5267	6.254241287	4.54E-05	0.004519059	-0.674296861	0.727452473	0.931552167	hypothetical protein HID58_084954, partial [Brassica napus]	-	-	-	-
MSTRG.48114	--	0.02	4.22	4.14	0.03	0.07	0.03	0.08	0.11	3.98	1.39	0.0433	2.7933	6.010366716	2.60E-06	0.00047436	-1.00690286	1	1	Reverse transcriptase domain [Arabidopsis thaliana x Arabidopsis arenosa]	-	-	-	-
MSTRG.48167	--	0.33	0.37	0.34	1.68	3.7	1.94	1.41	0.95	0.23	0.8633	2.44	0.3467	-2.81526012	0.000172993	0.012079061	1.31636857	0.108552679	0.442144023	BnaCnng37050D [Brassica napus]	-	-	-	-
MSTRG.48180	--	2.41	5.14	4.9	11.08	11.12	4.49	1.49	1.11	0.79	1.13	8.8967	4.15	-1.100153563	0.304745711	0.903227932	-1.876788564	0.001897193	0.041236913	BnaC09g43340D [Brassica napus]	-	-	-	-
MSTRG.48191	--	0	0	0	0	0	0.55	0.6	2.21	0.51	1.1067	0.1833	0	-7.518325308	0.236135936	0.837528484	10.11200503	3.51E-06	0.000411227	PREDICTED: non-specific lipid transfer protein GPI-anchored 2-like [Brassica oleracea var. oleracea] [Brassica oleracea]	-	GO:0009536//plastid;GO:0031224//intrinsic component of membrane	GO:0005488//binding	-
MSTRG.48219	--	4.21	3.98	2.94	2.66	3.17	4.81	8.4	9.85	10.27	9.5067	3.5467	3.71	0.064955442	0.38877213	0.958031466	1.357520389	1.94E-07	4.14E-05	DEK C-terminal [Arabidopsis suecica]	-	GO:0044424//intracellular part	-	GO:0009409//response to cold
MSTRG.48380	--	0.04	9.78	11.4	0.08	0.04	0.17	0.04	0	7.49	2.51	0.0967	7.0733	6.193227946	3.96E-06	0.00067008	-1.494702886	0.570243363	0.894242824	hypothetical protein HID58_072587 [Brassica napus]	-	-	-	-
MSTRG.48395	GRF2	5.54	6.7	7.57	27.8	22.07	11.35	4.51	5.78	6	5.43	20.4067	6.6033	-1.627774165	0.001099222	0.043566881	-0.282242276	0.416356293	0.817148317	protein tesmin/TSO1-like CXC 7 isoform X2 [Brassica napus]	-	GO:0012505//endomembrane system;GO:0031090//organelle membrane;GO:0043231//intracellular membrane-bounded organelle;GO:0044444//cytoplasmic part	GO:0016817//hydrolase activity, acting on acid anhydrides;GO:0051219//phosphoprotein binding	GO:0001101//response to acid chemical;GO:0003006//developmental process involved in reproduction;GO:0009887//organ morphogenesis;GO:0010468//regulation of gene expression;GO:0034645//cellular macromolecule biosynthetic process;GO:0043401//steroid hormone mediated signaling pathway;GO:0048827//phyllome development
MSTRG.48447	XRN3	0.07	2.38	2.19	0.12	0.07	0.13	0.08	0.13	3.14	1.1167	0.1067	1.5467	3.857980995	0.00031944	0.018827467	-0.46996371	0.682746545	0.923085714	BnaC09g09280D [Brassica napus]	ko03018//RNA degradation;ko03008//Ribosome biogenesis in eukaryotes	GO:0043231//intracellular membrane-bounded organelle	GO:0008409//5'-3' exonuclease activity	GO:0000280//nuclear division;GO:0000723//telomere maintenance;GO:0007059//chromosome segregation;GO:0010467//gene expression;GO:0010586//miRNA metabolic process;GO:0019219//regulation of nucleobase-containing compound metabolic process;GO:0022402//cell cycle process;GO:0033043//regulation of organelle organization;GO:0044248//cellular catabolic process;GO:0048856//anatomical structure development…
MSTRG.48546	CYP72A15	6.93	6.04	5.42	37.49	18.87	14.42	1.45	0.32	1.91	1.2267	23.5933	6.13	-1.944420282	1.28E-05	0.001697517	-2.321143808	0.000684556	0.020596832	PREDICTED: cytochrome P450 72A15-like [Brassica oleracea var. oleracea] [Brassica oleracea]	-	GO:0031224//intrinsic component of membrane;GO:0043231//intracellular membrane-bounded organelle	GO:0016491//oxidoreductase activity;GO:0046906//tetrapyrrole binding;GO:0046914//transition metal ion binding	GO:0030001//metal ion transport;GO:0044710//single-organism metabolic process
MSTRG.48603	--	0.52	0.16	0.92	0.62	4.24	0	2.83	8.74	1.63	4.4	1.62	0.5333	-1.602884409	0.515125619	0.984859178	3.044394119	0.000561267	0.017883952	protein ALP1-like [Brassica napus]	-	-	-	-
MSTRG.48700	SUD1	0.58	2.36	2.27	0.37	0.47	0.44	0.88	1.6	3.06	1.8467	0.4267	1.7367	2.025139562	0.000244314	0.015550215	0.088602604	0.913246538	0.970983242	PREDICTED: probable E3 ubiquitin ligase SUD1 [Brassica oleracea var. oleracea] [Brassica oleracea]	ko04141//Protein processing in endoplasmic reticulum	-	-	GO:0008152//metabolic process
MSTRG.48731	ddx11	1.59	0.73	0.77	0	0.27	4.23	7.6	16.42	3.46	9.16	1.5	1.03	-0.542318163	1	1	3.152703261	1.92E-07	4.13E-05	PREDICTED: probable ATP-dependent RNA helicase DDX11 [Brassica oleracea var. oleracea] [Brassica oleracea]	-	GO:0043231//intracellular membrane-bounded organelle	GO:0003678//DNA helicase activity;GO:0032550//purine ribonucleoside binding	GO:0000723//telomere maintenance;GO:0006260//DNA replication;GO:0010212//response to ionizing radiation;GO:0032844//regulation of homeostatic process;GO:0033043//regulation of organelle organization;GO:0070192//chromosome organization involved in meiotic cell cycle
MSTRG.48768	SCRM	0.34	0.12	0	0.1	1.18	5.4	5.35	15.1	0.8	7.0833	2.2267	0.1533	-3.860142336	0.016057884	0.240284419	5.52968517	3.27E-06	0.000386147	transcription factor ICE1-like, partial [Brassica napus]	-	GO:0043231//intracellular membrane-bounded organelle	GO:0001071//nucleic acid binding transcription factor activity;GO:0003676//nucleic acid binding;GO:0005515//protein binding	GO:0000338//protein deneddylation;GO:0003006//developmental process involved in reproduction;GO:0006355//regulation of transcription, DNA-templated;GO:0009409//response to cold;GO:0009639//response to red or far red light;GO:0009756//carbohydrate mediated signaling;GO:0010374//stomatal complex development;GO:0016570//histone modification;GO:0032446//protein modification by small protein conjugati…
MSTRG.4884	OlnB1	0.69	4.18	3.96	1.42	1.1	1.66	0	0	0.21	0.07	1.3933	2.9433	1.078910496	0.056739425	0.469286459	-5.393952205	7.37E-05	0.004033227	oleosin-B1 [Brassica rapa]	-	GO:0005811//lipid particle;GO:0031224//intrinsic component of membrane;GO:0043231//intracellular membrane-bounded organelle;GO:0044420//extracellular matrix component	GO:0005488//binding	GO:0000003//reproduction;GO:0000904//cell morphogenesis involved in differentiation;GO:0006833//water transport;GO:0008037//cell recognition;GO:0009664//plant-type cell wall organization;GO:0022414//reproductive process;GO:0051235//maintenance of location
MSTRG.48866	--	2.18	1.35	1.34	2.69	3.43	3.25	3.16	4.33	2.65	3.38	3.1233	1.6233	-0.944127276	0.21163047	0.812436477	1.058063975	0.001341607	0.032449843	tetratricopeptide repeat protein 38-like isoform X1 [Brassica napus]	-	-	-	-
MSTRG.48913	--	4.12	1.67	2.36	2.76	1.79	3.99	6.84	11.79	6.22	8.2833	2.8467	2.7167	-0.067436011	0.621750102	0.984859178	1.608373887	0.000244916	0.009969347	-	-	-	-	-
MSTRG.48918	SBE3	0	1.9	1.46	0.03	0.03	0	0	0.06	2.14	0.7333	0.02	1.12	5.807354922	0.000516043	0.02596185	-0.610957709	0.766379347	0.931552167	1,4-alpha-glucan-branching enzyme 3, chloroplastic/amyloplastic [Eutrema salsugineum]	-	GO:0009536//plastid	-	-
MSTRG.48989	--	0.66	0.26	0.4	0	0	0.84	2.76	3.18	1.46	2.4667	0.28	0.44	0.652076697	0.705733333	0.984859178	2.486987341	1.52E-06	0.000209104	BnaC03g65670D [Brassica napus]	-	-	GO:0046914//transition metal ion binding;GO:0097159//organic cyclic compound binding	-
MSTRG.49016	MSD1	1.6	1.45	1.69	5.43	3.9	3.08	0.38	0.56	0.68	0.54	4.1367	1.58	-1.388544151	0.00302758	0.085948689	-1.548893246	0.000763367	0.022233823	superoxide dismutase Mn [Brassica oleracea var. botrytis] [Brassica oleracea]	ko04146//Peroxisome	GO:0031224//intrinsic component of membrane;GO:0042170//plastid membrane;GO:0044429//mitochondrial part	GO:0009975//cyclase activity;GO:0016209//antioxidant activity;GO:0016491//oxidoreductase activity;GO:0046914//transition metal ion binding	GO:0003006//developmental process involved in reproduction;GO:0006006//glucose metabolic process;GO:0006090//pyruvate metabolic process;GO:0006801//superoxide metabolic process;GO:0006970//response to osmotic stress;GO:0006996//organelle organization;GO:0009617//response to bacterium;GO:0009886//post-embryonic morphogenesis;GO:0010038//response to metal ion;GO:0016117//carotenoid biosynthetic pro…
MSTRG.49029	--	0.27	1.97	2.89	32.76	3.12	1.42	0	0.02	0.13	0.05	12.4333	1.71	-2.8621449	0.0651146	0.502544667	-5.09592442	4.11E-05	0.00261874	BnaA07g03900D [Brassica napus]	-	-	-	-
MSTRG.49221	TT10	30.5	72.41	70.21	146.59	203.11	54.89	17.99	12.94	23.33	18.0867	134.8633	57.7067	-1.224688258	0.256517344	0.857842598	-1.673811452	0.001056576	0.027510252	PREDICTED: laccase-15 [Brassica oleracea var. oleracea] [Brassica oleracea]	-	GO:0005576//extracellular region	GO:0016491//oxidoreductase activity	GO:0009699//phenylpropanoid biosynthetic process;GO:0009808//lignin metabolic process
MSTRG.49327	SAC1	1.82	2.1	1.8	3.53	3	2.99	3.89	5.47	3.81	4.39	3.1733	1.9067	-0.734946427	0.446886662	0.979771144	1.203168293	1.97E-05	0.001511659	phosphoinositide phosphatase SAC1 [Brassica rapa]	-	-	GO:0016787//hydrolase activity	GO:0005975//carbohydrate metabolic process;GO:0006796//phosphate-containing compound metabolic process;GO:0016043//cellular component organization;GO:0019637//organophosphate metabolic process;GO:0044249//cellular biosynthetic process;GO:0044710//single-organism metabolic process;GO:0044763//single-organism cellular process;GO:0071554//cell wall organization or biogenesis;GO:1901576//organic subs…
MSTRG.49457	PANS2	0.14	2.38	1.81	0.06	0	0.12	0.04	0	1.96	0.6667	0.06	1.4433	4.588298213	0.000123817	0.009477431	-1.114367025	0.50145161	0.863460843	PH, RCC1 and FYVE domains-containing protein 1-like [Brassica napus]	-	GO:0043231//intracellular membrane-bounded organelle;GO:0044444//cytoplasmic part	GO:0003824//catalytic activity;GO:0043169//cation binding	GO:0051220//cytoplasmic sequestering of protein
MSTRG.49916	MVP1	15.71	25.65	22.94	95.11	135.33	29.78	8.64	4.84	5.28	6.2533	86.74	21.4333	-2.016841206	0.006564444	0.140471218	-1.77715891	7.66E-05	0.004147629	PREDICTED: inactive GDSL esterase/lipase-like protein 25 [Brassica oleracea var. oleracea] [Brassica oleracea]	-	GO:0005576//extracellular region;GO:0005774//vacuolar membrane;GO:0005840//ribosome;GO:0005911//cell-cell junction;GO:0009526//plastid envelope;GO:0042579//microbody	GO:0016788//hydrolase activity, acting on ester bonds	GO:0006796//phosphate-containing compound metabolic process;GO:0006886//intracellular protein transport;GO:0006950//response to stress;GO:0006996//organelle organization;GO:0009617//response to bacterium;GO:0019637//organophosphate metabolic process;GO:0019759//glycosinolate catabolic process;GO:0044238//primary metabolic process;GO:0044249//cellular biosynthetic process;GO:0044711//single-organi…
MSTRG.49978	ECP63	10.45	7.45	6.5	8.8	10.36	13.16	23.35	32.7	22.19	26.08	10.7733	8.1333	-0.40554605	0.984826766	0.995698725	1.681025223	5.01E-10	3.04E-07	PREDICTED: LOW QUALITY PROTEIN: embryonic protein DC-8 [Brassica oleracea var. oleracea] [Brassica oleracea]	-	GO:0044444//cytoplasmic part	-	GO:0003006//developmental process involved in reproduction
MSTRG.50011	At3g60360	0.13	1.13	1.87	0	0	0.06	0.06	0	1.24	0.4333	0.02	1.0433	5.705056346	0.000466044	0.024123424	-1.267651034	0.450024868	0.83751636	hexokinase-1 protein [Arabidopsis thaliana]	-	GO:0043231//intracellular membrane-bounded organelle	-	GO:0043094//cellular metabolic compound salvage;GO:0044707//single-multicellular organism process;GO:0071840//cellular component organization or biogenesis
MSTRG.50117	DPB	0.4	2.75	2.01	0	0.06	0.03	0.03	0	4.38	1.47	0.03	1.72	5.841302254	4.64E-07	0.000119975	-0.22659241	0.898033826	0.964025163	transcription factor-like protein DPB isoform X3 [Brassica rapa]	-	-	-	-
MSTRG.50494	TSN1	3.31	13	10	0.35	0.29	0.06	0.19	0.19	19.32	6.5667	0.2333	8.77	5.232112516	4.17E-13	1.42E-09	-0.417415619	0.780887461	0.931552167	PREDICTED: staphylococcal nuclease domain-containing protein 1-like [Brassica oleracea var. oleracea] [Brassica oleracea]	-	GO:0005911//cell-cell junction;GO:0012505//endomembrane system;GO:0031332//RNAi effector complex;GO:0043231//intracellular membrane-bounded organelle;GO:0044444//cytoplasmic part	GO:0003676//nucleic acid binding;GO:0016788//hydrolase activity, acting on ester bonds	GO:0006006//glucose metabolic process;GO:0006739//NADP metabolic process;GO:0006970//response to osmotic stress;GO:0009685//gibberellin metabolic process;GO:0010038//response to metal ion;GO:0015031//protein transport;GO:0016458//gene silencing;GO:0044707//single-multicellular organism process
MSTRG.50557	At5g08680	5.64	6.4	4.49	3.57	2.63	1.38	2.22	3.59	9.99	5.2667	2.5267	5.51	1.124816971	2.87E-08	1.41E-05	-0.065162166	0.896174316	0.963155337	PREDICTED: ATP synthase subunit beta-3, mitochondrial-like [Brassica oleracea var. oleracea] [Brassica oleracea]	ko01100//Metabolic pathways;ko00190//Oxidative phosphorylation	GO:0009526//plastid envelope;GO:0019866//organelle inner membrane;GO:0033178//proton-transporting two-sector ATPase complex, catalytic domain;GO:0043232//intracellular non-membrane-bounded organelle;GO:0044455//mitochondrial membrane part	GO:0008187//poly-pyrimidine tract binding;GO:0019829//cation-transporting ATPase activity;GO:0032550//purine ribonucleoside binding;GO:0046914//transition metal ion binding	GO:0006754//ATP biosynthetic process;GO:0010038//response to metal ion;GO:0015988//energy coupled proton transmembrane transport, against electrochemical gradient
MSTRG.5061	--	0.61	1.09	0.76	0.27	0	0	0	0	0	0	0.09	0.82	3.187627003	0.009044587	0.170350102	-9.6794801	0.002000785	0.042659271	F-box protein At2g35280 [Brassica napus]	-	-	-	-
MSTRG.50636	RE1	0.16	0.77	0.64	0	0	0.03	0	0.01	1.11	0.3733	0.01	0.5233	5.709658248	8.05E-06	0.00115718	-0.487265827	0.772099776	0.931552167	01P13-1 [Brassica rapa subsp. pekinensis] [Brassica rapa]	-	-	-	-
MSTRG.50638	--	0.54	0.41	0.58	0	0	0	0	0	0.5	0.1667	0	0.51	8.994353437	0.00092673	0.03863401	-1.613531653	0.373212335	0.782874856	-	-	-	-	-
MSTRG.50654	RPP1	0.21	2.01	2.67	0.03	0	0.03	0.03	0	2.44	0.8233	0.02	1.63	6.348728154	2.67E-06	0.00048438	-0.985323423	0.579174377	0.900540685	disease resistance protein TAO1 isoform X4 [Brassica rapa]	-	GO:0044424//intracellular part	-	GO:0006950//response to stress
MSTRG.50656	At3g47200	0.04	1	1.11	0	0	0	0	0	0.61	0.2033	0	0.7167	9.485158444	5.55E-06	0.000866257	-1.817455512	0.355484657	0.767739815	UPF0481 protein At3g47200 [Arabidopsis lyrata subsp. lyrata] [Arabidopsis lyrata]	-	GO:0009536//plastid;GO:0031224//intrinsic component of membrane	-	GO:0046942//carboxylic acid transport
MSTRG.50662	ASP3	15.68	14.3	14.73	6.78	3.35	5.74	7.64	13.6	31.86	17.7	5.29	14.9033	1.494295418	5.23E-07	0.000131333	0.248114315	0.60113494	0.913487456	PREDICTED: aspartate aminotransferase 3, chloroplastic [Brassica oleracea var. oleracea] [Brassica oleracea]	ko01100//Metabolic pathways;ko01110//Biosynthesis of secondary metabolites;ko01200//Carbon metabolism;ko01230//Biosynthesis of amino acids;ko00270//Cysteine and methionine metabolism;ko01210//2-Oxocarboxylic acid metabolism;ko00710//Carbon fixation in photosynthetic organisms;ko00330//Arginine and proline metabolism;ko00250//Alanine, aspartate and glutamate metabolism;ko00400//Phenylalanine, tyro…	GO:0005911//cell-cell junction;GO:0009536//plastid;GO:0030312//external encapsulating structure;GO:0031090//organelle membrane;GO:0042579//microbody	GO:0043168//anion binding;GO:0046914//transition metal ion binding;GO:0070546//L-phenylalanine aminotransferase activity	GO:0006101//citrate metabolic process;GO:0006511//ubiquitin-dependent protein catabolic process;GO:0009062//fatty acid catabolic process;GO:0009064//glutamine family amino acid metabolic process;GO:0009066//aspartate family amino acid metabolic process;GO:0009078//pyruvate family amino acid metabolic process;GO:0009404//toxin metabolic process;GO:0009692//ethylene metabolic process;GO:0009725//re…
MSTRG.50669	ASP3	3.9	6.95	7.04	0	0	0	0.39	0	15.75	5.38	0	5.9633	12.54190327	2.64E-10	3.14E-07	-0.148512809	1	1	PREDICTED: aspartate aminotransferase 3, chloroplastic [Brassica oleracea var. oleracea] [Brassica oleracea]	ko01100//Metabolic pathways;ko01110//Biosynthesis of secondary metabolites;ko01200//Carbon metabolism;ko01230//Biosynthesis of amino acids;ko00270//Cysteine and methionine metabolism;ko01210//2-Oxocarboxylic acid metabolism;ko00710//Carbon fixation in photosynthetic organisms;ko00330//Arginine and proline metabolism;ko00250//Alanine, aspartate and glutamate metabolism;ko00400//Phenylalanine, tyro…	GO:0009536//plastid;GO:0042579//microbody	GO:0043168//anion binding;GO:0070546//L-phenylalanine aminotransferase activity	GO:0006101//citrate metabolic process;GO:0006511//ubiquitin-dependent protein catabolic process;GO:0009062//fatty acid catabolic process;GO:0009064//glutamine family amino acid metabolic process;GO:0009066//aspartate family amino acid metabolic process;GO:0009078//pyruvate family amino acid metabolic process;GO:0009404//toxin metabolic process;GO:0009692//ethylene metabolic process;GO:0009725//re…
MSTRG.50681	--	0.44	1.55	1.97	0.07	0	0.1	0.39	0.29	2.69	1.1233	0.0567	1.32	4.541893779	7.32E-06	0.001076549	-0.232751839	0.825242603	0.931552167	Core-2/I-branching beta-1,6-N-acetylglucosaminyltransferase family protein [Arabidopsis thaliana]	-	GO:0031984//organelle subcompartment;GO:0043231//intracellular membrane-bounded organelle	GO:0008194//UDP-glycosyltransferase activity	-
MSTRG.50726	GGP5	0.26	2.58	2.42	0.02	0	0	0	0	1.59	0.53	0.0067	1.7533	8.038918989	4.43E-08	2.00E-05	-1.726036034	1	1	PREDICTED: gamma-glutamyl peptidase 3 [Camelina sativa]	-	-	-	-
MSTRG.5079	LCR62	18.79	42.61	35.01	200	85.98	53.81	4.16	0.4	5.21	3.2567	113.2633	32.1367	-1.817388694	0.022538735	0.290072082	-3.302752329	0.000124077	0.005993651	low-molecular-weight cysteine-rich 61 [Arabidopsis thaliana]	-	-	-	-
MSTRG.50922	--	0.09	4.86	4.53	0	0	0	0	0	6.54	2.18	0	3.16	11.62570884	1.78E-05	0.00217911	-0.535596423	1	1	BnaC02g02960D [Brassica napus]	-	-	-	-
MSTRG.51012	--	1.66	8.54	6.03	32.21	5.73	2.09	0.19	0	0.45	0.2133	13.3433	5.41	-1.302418616	0.58080994	0.984859178	-4.664447285	2.65E-05	0.001898886	unnamed protein product [Brassica napus]	-	-	-	-
MSTRG.51977	HTH	32.21	73.76	76.21	8.81	4.25	8.96	48.7	26.33	51.84	42.29	7.34	60.7267	3.048478213	4.97E-10	5.43E-07	-0.52201362	0.353630796	0.766482673	BnaC03g15770D [Brassica napus]	ko01100//Metabolic pathways;ko00260//Glycine, serine and threonine metabolism	GO:0009536//plastid	GO:0000166//nucleotide binding;GO:0016614//oxidoreductase activity, acting on CH-OH group of donors;GO:0016829//lyase activity	GO:0044710//single-organism metabolic process;GO:0048437//floral organ development
MSTRG.52159	--	0	0	0	1.23	0.29	0.36	0.19	0.25	0	0.1467	0.6267	0	-9.291554446	0.000175839	0.012215396	7.196397213	0.121547515	0.468678008	protein GRAVITROPIC IN THE LIGHT 1 [Eutrema salsugineum]	-	GO:0043231//intracellular membrane-bounded organelle	-	-
MSTRG.52380	ACT1	4.43	6.56	8.92	6.14	22.27	21.83	19.19	35.06	11.96	22.07	16.7467	6.6367	-1.335343243	0.165169312	0.742003745	1.733555909	0.00082835	0.023376308	BnaC02g31450D [Brassica napus]	-	GO:0005911//cell-cell junction;GO:0009526//plastid envelope;GO:0009532//plastid stroma;GO:0016020//membrane;GO:0030312//external encapsulating structure;GO:0043232//intracellular non-membrane-bounded organelle	GO:0005198//structural molecule activity;GO:0017111//nucleoside-triphosphatase activity;GO:0032550//purine ribonucleoside binding	GO:0006006//glucose metabolic process;GO:0006950//response to stress;GO:0006996//organelle organization;GO:0008104//protein localization;GO:0009314//response to radiation;GO:0009725//response to hormone;GO:0010015//root morphogenesis;GO:0048588//developmental cell growth;GO:0051603//proteolysis involved in cellular protein catabolic process
MSTRG.52799	PCMP-H29	5.57	10.75	12.98	0.16	0.43	2.75	5.9	4.86	11.02	7.26	1.1133	9.7667	3.132980657	0.00134212	0.049532877	-0.427896711	0.453841089	0.840388202	PREDICTED: pentatricopeptide repeat-containing protein At2g41080 [Raphanus sativus]	-	GO:0043231//intracellular membrane-bounded organelle	-	-
MSTRG.52808	--	13.11	23.01	21.53	55.01	68.98	36.16	2.36	0.18	2.87	1.8033	53.3833	19.2167	-1.474031285	0.017719297	0.253374336	-3.413620109	0.000170078	0.007625739	transmembrane protein [Arabidopsis thaliana]	-	-	-	-
MSTRG.52953	--	90.9	51.07	50.32	25.96	33.02	52.88	174.58	465.13	150.22	263.31	37.2867	64.0967	0.781589502	0.034104951	0.361554791	2.038441076	3.60E-05	0.002380312	hypothetical protein F2Q69_00002232 [Brassica cretica]	-	-	-	-
MSTRG.53225	LAX2	1.1	0.95	0.92	2.62	1.05	0.43	0.16	0.07	0.29	0.1733	1.3667	0.99	-0.465160979	0.778713323	0.984859178	-2.513879403	0.000609734	0.018880557	PREDICTED: auxin transporter-like protein 2 [Raphanus sativus]	ko04075//Plant hormone signal transduction	GO:0031224//intrinsic component of membrane	GO:0015291//secondary active transmembrane transporter activity;GO:0080161//auxin transmembrane transporter activity	GO:0006637//acyl-CoA metabolic process;GO:0009755//hormone-mediated signaling pathway;GO:0009791//post-embryonic development;GO:0009826//unidimensional cell growth;GO:0010051//xylem and phloem pattern formation;GO:0014070//response to organic cyclic compound;GO:0016129//phytosteroid biosynthetic process;GO:0043479//pigment accumulation in tissues in response to UV light;GO:0045229//external encap…
MSTRG.53279	PMDH1	1.1	0.3	0.4	0.93	0.58	0.84	1.94	4.99	1.86	2.93	0.7833	0.6	-0.38466385	0.954668281	0.99157632	2.287866259	0.000390771	0.013815939	malate dehydrogenase 1, peroxisomal-like [Brassica napus]	ko01100//Metabolic pathways;ko01110//Biosynthesis of secondary metabolites;ko01200//Carbon metabolism;ko00270//Cysteine and methionine metabolism;ko00620//Pyruvate metabolism;ko00630//Glyoxylate and dicarboxylate metabolism;ko00710//Carbon fixation in photosynthetic organisms;ko00020//Citrate cycle (TCA cycle)	GO:0005576//extracellular region;GO:0005777//peroxisome;GO:0009526//plastid envelope	GO:0016615//malate dehydrogenase activity	GO:0006090//pyruvate metabolic process;GO:0006101//citrate metabolic process;GO:0006355//regulation of transcription, DNA-templated;GO:0006544//glycine metabolic process;GO:0006605//protein targeting;GO:0006633//fatty acid biosynthetic process;GO:0006739//NADP metabolic process;GO:0006779//porphyrin-containing compound biosynthetic process;GO:0006790//sulfur compound metabolic process;GO:0006952/…
MSTRG.53617	XTH9	2.29	2.14	2.34	7.56	12.07	1.6	0.14	0.19	0.83	0.3867	7.0767	2.2567	-1.648876632	0.113087464	0.642062359	-2.545031028	0.001369639	0.032926825	PREDICTED: xyloglucan endotransglucosylase/hydrolase protein 9 [Brassica oleracea var. oleracea] [Brassica oleracea]	-	GO:0005576//extracellular region;GO:0030312//external encapsulating structure	GO:0016758//transferase activity, transferring hexosyl groups;GO:0016787//hydrolase activity	GO:0044042//glucan metabolic process;GO:0045229//external encapsulating structure organization;GO:0048509//regulation of meristem development
MSTRG.53747	--	4.03	11.9	10.3	147.43	72.83	20.15	0.9	0	0	0.3	80.1367	8.7433	-3.196207194	0.000266456	0.016573834	-4.865148996	0.000211088	0.00896312	hypothetical protein HID58_010773 [Brassica napus]	-	-	-	-
MSTRG.54121	--	0.13	0.07	0.09	3.83	0.68	0.34	0	0	0.05	0.0167	1.6167	0.0967	-4.063859942	0.000717975	0.032898748	-2.5360529	0.287017849	0.701193335	hypothetical protein Bca52824_053923 [Brassica carinata]	-	-	-	-
MSTRG.54133	REM7	0.42	0.22	0.23	0.09	0	0.16	1.18	0.71	1.18	1.0233	0.0833	0.29	1.799087306	0.089496741	0.58034944	1.81915135	0.002410456	0.048449082	PREDICTED: B3 domain-containing protein REM7-like [Brassica oleracea var. oleracea] [Brassica oleracea]	-	GO:0043231//intracellular membrane-bounded organelle	-	-
MSTRG.54390	--	0	0	0	0.53	0.86	0.21	0	0	0	0	0.5333	0	-9.058893689	0.000234788	0.015121782	0	1	1	Harbinger transposase-derived protein [Arabidopsis suecica]	-	-	-	-
MSTRG.54642	RPN1A	4.32	5.6	4.34	5.31	0.15	0.03	0	0.07	1.59	0.5533	1.83	4.7533	1.377095927	0.116687936	0.649952788	-3.102718835	0.001155289	0.029200339	BnaCnng48550D [Brassica napus]	ko03050//Proteasome	GO:0005911//cell-cell junction;GO:0016020//membrane;GO:0043231//intracellular membrane-bounded organelle;GO:0043234//protein complex;GO:0044444//cytoplasmic part	GO:0032182//ubiquitin-like protein binding	GO:0001101//response to acid chemical;GO:0006006//glucose metabolic process;GO:0006511//ubiquitin-dependent protein catabolic process;GO:0006952//defense response;GO:0006996//organelle organization;GO:0007049//cell cycle;GO:0009606//tropism;GO:0009894//regulation of catabolic process;GO:0035966//response to topologically incorrect protein;GO:0043623//cellular protein complex assembly
MSTRG.54684	IQD1	0.56	0.99	0.52	0	0.04	0.89	3.29	3.03	3.01	3.11	0.31	0.69	1.154328146	0.415092444	0.967747143	2.172246313	7.14E-06	0.000694786	BnaC03g42550D [Brassica napus]	-	GO:0016020//membrane;GO:0043231//intracellular membrane-bounded organelle	-	-
MSTRG.54705	At2g39360	5.79	2.11	2.87	2.07	0.82	14.01	17.2	29.33	11.88	19.47	5.6333	3.59	-0.650004997	0.650624251	0.984859178	2.439197135	9.46E-07	0.000145211	probable receptor-like protein kinase At2g39360 [Arabidopsis lyrata subsp. lyrata] [Arabidopsis lyrata]	-	GO:0016020//membrane	GO:0004672//protein kinase activity	GO:0001101//response to acid chemical;GO:0001558//regulation of cell growth;GO:0015698//inorganic anion transport;GO:0016310//phosphorylation
MSTRG.54706	MYOB1	9.8	3.88	3.47	3.51	1.53	21.83	19.91	41.53	15.96	25.8	8.9567	5.7167	-0.647787745	1	1	2.17412499	4.14E-05	0.002634893	PREDICTED: myosin-binding protein 1 [Brassica oleracea var. oleracea] [Brassica oleracea]	-	-	-	-
MSTRG.54976	--	1.02	0.73	0.48	29.46	2.83	2.99	0.24	0.01	0.53	0.26	11.76	0.7433	-3.983734946	0.000184775	0.012668875	-1.515497681	0.273491023	0.686970359	BnaC07g15850D [Brassica napus]	-	-	-	-
MSTRG.54977	--	0.1	0.03	0	2.5	0.25	0.91	0	0	0.87	0.29	1.22	0.0433	-4.81526012	0.000719784	0.032898748	2.742503778	0.264354501	0.676343002	BnaUnng05000D, partial [Brassica napus]	-	-	-	-
MSTRG.55200	OFUT39	21.97	12.76	11.87	10	4.8	13.94	32.98	34.39	33.72	33.6967	9.58	15.5333	0.697269893	0.063988079	0.499265237	1.11723843	3.79E-05	0.002469538	O-fucosyltransferase 39 isoform X1 [Brassica rapa]	-	-	GO:0016740//transferase activity	-
MSTRG.55374	TUBB2	8.27	6.61	5.98	25	19.64	4.02	0.71	0.65	1.24	0.8667	16.22	6.9533	-1.221997162	0.274627094	0.87584959	-3.004155629	4.59E-14	7.75E-11	tubulin beta-2 chain [Camelina sativa]	ko04145//Phagosome	GO:0005911//cell-cell junction;GO:0015630//microtubule cytoskeleton;GO:0016020//membrane;GO:0030312//external encapsulating structure;GO:0043231//intracellular membrane-bounded organelle;GO:0043234//protein complex	GO:0005198//structural molecule activity;GO:0017111//nucleoside-triphosphatase activity;GO:0032550//purine ribonucleoside binding	GO:0006006//glucose metabolic process;GO:0006970//response to osmotic stress;GO:0006996//organelle organization;GO:0010038//response to metal ion;GO:0043623//cellular protein complex assembly;GO:0044763//single-organism cellular process;GO:0051603//proteolysis involved in cellular protein catabolic process
MSTRG.56195	GGT1	4.74	67.88	51.52	86.15	30.96	13.29	2.55	0.18	0.84	1.19	43.4667	41.38	-0.070975819	0.585137218	0.984859178	-5.119900167	4.34E-06	0.000481634	BnaC03g76380D [Brassica napus]	ko01100//Metabolic pathways;ko00480//Glutathione metabolism;ko00460//Cyanoamino acid metabolism;ko00590//Arachidonic acid metabolism;ko00430//Taurine and hypotaurine metabolism	-	-	-
MSTRG.56196	GGT2	0.26	0.93	0.82	2.55	1.14	0.45	0.06	0	0	0.02	1.38	0.67	-1.042435266	0.63215074	0.984859178	-5.06608919	0.000629165	0.01928852	PREDICTED: gamma-glutamyltranspeptidase 1-like [Brassica oleracea var. oleracea] [Brassica oleracea]	ko01100//Metabolic pathways;ko00480//Glutathione metabolism;ko00460//Cyanoamino acid metabolism;ko00590//Arachidonic acid metabolism;ko00430//Taurine and hypotaurine metabolism	-	-	-
MSTRG.56403	GLC1	3.41	1.28	1.13	4.82	2.75	1.67	5.43	8.62	4.01	6.02	3.08	1.94	-0.666873699	0.809964051	0.984859178	1.633706835	0.001264331	0.03106761	PREDICTED: glucan endo-1,3-beta-glucosidase-like isoform X1 [Brassica oleracea var. oleracea] [Brassica oleracea]	-	GO:0005911//cell-cell junction;GO:0030312//external encapsulating structure	GO:0004553//hydrolase activity, hydrolyzing O-glycosyl compounds	GO:0010243//response to organonitrogen compound;GO:0044238//primary metabolic process
MSTRG.56589	--	0.1	4.06	4.83	0.05	0.05	0	0.1	0	5.71	1.9367	0.0333	2.9967	6.490249211	7.16E-06	0.001062565	-0.629782952	0.726552411	0.931552167	unnamed protein product, partial [Brassica napus]	-	-	-	-
MSTRG.56687	--	0	4.81	3.41	0	0.09	0.05	0.05	0.1	3.97	1.3733	0.0467	2.74	5.875639662	0.000401993	0.02175506	-0.996494056	0.584490097	0.904784393	BnaC03g65070D [Brassica napus]	-	-	-	-
MSTRG.56706	At1g75220	0.14	1.36	1.86	0.7	0.37	0.3	0	0	0.04	0.0133	0.4567	1.12	1.29428534	0.05456085	0.461135831	-6.392317423	0.000325916	0.012246962	sugar transporter ERD6-like 6 [Prunus yedoensis var. nudiflora] [Prunus yedoensis]	-	GO:0031090//organelle membrane;GO:0043231//intracellular membrane-bounded organelle	GO:0022891//substrate-specific transmembrane transporter activity	GO:0044765//single-organism transport
MSTRG.56777	CUL1	0.28	11.84	12.44	0.17	0.17	0.04	0.13	0.22	36.86	12.4033	0.1267	8.1867	6.014167332	4.82E-08	2.14E-05	0.59937983	1	1	cullin-1-like [Brassica napus]	ko04141//Protein processing in endoplasmic reticulum;ko04120//Ubiquitin mediated proteolysis	GO:0000228//nuclear chromosome;GO:0015630//microtubule cytoskeleton;GO:0044444//cytoplasmic part	GO:0005488//binding	GO:0001101//response to acid chemical;GO:0006464//cellular protein modification process;GO:0007049//cell cycle;GO:0009755//hormone-mediated signaling pathway;GO:0009793//embryo development ending in seed dormancy;GO:0009888//tissue development;GO:0034645//cellular macromolecule biosynthetic process;GO:0043623//cellular protein complex assembly;GO:0044765//single-organism transport;GO:0048827//phy…
MSTRG.57062	--	1.91	1.07	0.88	0.8	1.16	1.45	3.09	5.29	2.1	3.4933	1.1367	1.2867	0.178829108	0.330408919	0.920071983	1.440965964	0.002084788	0.043913839	F22C12.1 [Arabidopsis thaliana]	-	-	-	-
MSTRG.57149	--	0.21	2.01	3.56	0	0	0	0	0	2.49	0.83	0	1.9267	10.91189128	9.34E-06	0.001300354	-1.21492375	0.533018138	0.884565953	BnaC04g53700D [Brassica napus]	-	-	-	-
MSTRG.57231	PDX13	0	4.85	4.55	0.02	0.02	0	0.06	0.02	4.64	1.5733	0.0133	3.1333	7.876516947	5.50E-06	0.00086161	-0.993873897	1	1	BnaC04g13320D [Brassica napus]	ko00750//Vitamin B6 metabolism	GO:0009536//plastid;GO:0016020//membrane	GO:0016829//lyase activity;GO:0046983//protein dimerization activity	GO:0006725//cellular aromatic compound metabolic process;GO:0006732//coenzyme metabolic process;GO:0006796//phosphate-containing compound metabolic process;GO:0006970//response to osmotic stress;GO:0019637//organophosphate metabolic process;GO:0042364//water-soluble vitamin biosynthetic process;GO:0042816//vitamin B6 metabolic process;GO:0044238//primary metabolic process;GO:1901615//organic hydr…
MSTRG.57367	--	1.41	0.33	0.75	0.84	0.25	4.18	3.54	5.8	7.94	5.76	1.7567	0.83	-1.08165722	0.436156767	0.976753946	2.79488557	1.91E-06	0.000253475	hypothetical protein F2Q70_00039729 [Brassica cretica]	-	-	-	-
MSTRG.57869	SRS7	0	3.47	3.42	0	0	0.03	0	0	0.89	0.2967	0.01	2.2967	7.843397672	6.72E-05	0.006039015	-2.952626742	0.416945569	0.817172372	protein SHI RELATED SEQUENCE 7 [Brassica rapa]	-	GO:0043231//intracellular membrane-bounded organelle	GO:0001071//nucleic acid binding transcription factor activity;GO:0043169//cation binding;GO:0046983//protein dimerization activity	GO:0006351//transcription, DNA-templated;GO:0009850//auxin metabolic process;GO:0009937//regulation of gibberellic acid mediated signaling pathway;GO:0010468//regulation of gene expression;GO:0048438//floral whorl development
MSTRG.58242	AtMg01250	0.17	0.33	0.49	0.04	0.02	0	0.1	0.15	0	0.0833	0.02	0.33	4.044394119	0.000126563	0.009632268	-1.98550043	0.08845431	0.397386656	Reverse transcriptase domain [Arabidopsis suecica]	-	-	-	-
MSTRG.58246	--	0.25	3.02	2.94	0.22	0.33	0.12	0.06	0.24	7.48	2.5933	0.2233	2.07	3.212360268	0.000410598	0.022031834	0.325176887	1	1	BnaA07g07490D [Brassica napus]	-	-	-	-
MSTRG.58281	--	2.13	5.4	3.18	15.94	3.02	3.15	0.3	0	0.69	0.33	7.37	3.57	-1.045740545	0.622325243	0.984859178	-3.435386145	0.001159915	0.029288694	unnamed protein product [Brassica napus]	-	-	-	-
MSTRG.58334	PRP31	3.68	0.98	0.82	0.84	0.57	1.46	6.04	14.73	7.69	9.4867	0.9567	1.8267	0.933125156	0.106251924	0.624806474	2.376687864	0.000119747	0.005829645	U4/U6 small nuclear ribonucleoprotein Prp31 homolog [Brassica rapa]	ko03040//Spliceosome	GO:0044423//virion part;GO:0097525//spliceosomal snRNP complex	-	GO:0000377//RNA splicing, via transesterification reactions with bulged adenosine as nucleophile;GO:0003006//developmental process involved in reproduction
MSTRG.58482	KIN13B	3.39	2.5	2.33	2.88	3.41	3	4.97	8.28	4.48	5.91	3.0967	2.74	-0.176540203	0.444859495	0.979771144	1.108982237	0.00073252	0.021637998	kinesin-like protein KIN-13B [Capsella rubella]	-	GO:0016020//membrane;GO:0043231//intracellular membrane-bounded organelle	-	-
MSTRG.58557	pol	0.02	0.98	1.19	0.1	0.02	0.04	0.01	0	1.26	0.4233	0.0533	0.73	3.77478706	0.000626364	0.029803051	-0.786102373	0.684029381	0.923793429	Pentatricopeptide repeat [Arabidopsis thaliana x Arabidopsis arenosa]	-	-	-	-
MSTRG.58778	--	0.21	1.2	1.08	0	1.52	5.02	7.13	11.73	6.36	8.4067	2.18	0.83	-1.393144893	0.465964058	0.982725573	3.340350628	1.14E-06	0.000168795	BnaC08g08550D [Brassica napus]	-	-	-	-
MSTRG.58779	--	0	0.87	0.33	0	0.24	38	14.01	30.63	37.57	27.4033	12.7467	0.4	-4.993976212	1	1	6.098207583	1.63E-12	1.92E-09	BnaAnng04230D [Brassica napus]	-	-	-	-
MSTRG.58793	--	0.24	1.03	1.26	1.46	0.49	0.29	0	0	0	0	0.7467	0.8433	0.175638653	0.391274674	0.958291179	-9.719959169	0.001360952	0.032758497	hypothetical protein DY000_02061647 [Brassica cretica]	-	-	-	-
MSTRG.58794	--	0.48	0.47	0.25	10.93	2.43	1.74	0.07	0.06	0.26	0.13	5.0333	0.4	-3.653442239	1.72E-05	0.002133627	-1.621488377	0.069101361	0.350314522	BnaC07g15840D [Brassica napus]	-	-	-	-
MSTRG.58812	RE2	0.12	0.21	0.18	7.25	1.62	1.33	0	0.08	0.91	0.33	3.4	0.17	-4.321928095	9.45E-06	0.001310405	0.956931278	0.545499606	0.884950531	uncharacterized mitochondrial protein AtMg00810-like [Brassica rapa]	-	-	-	-
MSTRG.58888	At1g01500	0.08	1.36	0.85	0.05	0	0.04	0	0	0.05	0.0167	0.03	0.7633	4.669278787	0.000262762	0.016368886	-5.517275693	0.000965246	0.025895436	Erythronate-4-phosphate dehydrogenase family protein [Arabidopsis thaliana]	-	GO:0043231//intracellular membrane-bounded organelle	-	-
MSTRG.59351	--	0.26	0.37	0.42	0.07	0.77	1.12	1.72	3.12	0.73	1.8567	0.6533	0.35	-0.900464326	0.604563853	0.984859178	2.407288	0.000747578	0.021908017	BnaC03g57790D [Brassica napus]	ko03420//Nucleotide excision repair;ko03440//Homologous recombination;ko03030//DNA replication;ko03430//Mismatch repair	-	-	-
MSTRG.59368	--	0.82	0.34	0.41	0.67	1.84	2.41	2.63	5.51	0.99	3.0433	1.64	0.5233	-1.647893756	0.12533954	0.668894271	2.539850301	0.001209549	0.03007317	BnaA07g24730D [Brassica napus]	-	-	-	-
MSTRG.59459	--	2.81	0.39	0.14	8.16	1.03	0.47	0.03	0.16	0.08	0.09	3.22	1.1133	-1.532175086	0.456611852	0.979771144	-3.62881679	0.002222831	0.045968535	BnaA09g22890D [Brassica napus]	-	-	-	-
MSTRG.59475	scw1	0.58	0.17	0.27	0.03	0	0.3	1.3	2	1.36	1.5533	0.11	0.34	1.628031223	0.238709128	0.839530303	2.191760803	0.000124903	0.00601664	BnaC01g32160D [Brassica napus]	-	-	GO:0097159//organic cyclic compound binding	-
MSTRG.5951	CKX3	0.53	0.79	0.64	1.6	2.67	1.1	0	0.03	0.06	0.03	1.79	0.6533	-1.454068434	0.075146685	0.536508556	-4.444784843	4.73E-05	0.002918233	cytokinin dehydrogenase 3 [Brassica rapa]	ko00908//Zeatin biosynthesis	GO:0043231//intracellular membrane-bounded organelle	GO:0000166//nucleotide binding;GO:0016616//oxidoreductase activity, acting on the CH-OH group of donors, NAD or NADP as acceptor;GO:0016641//oxidoreductase activity, acting on the CH-NH2 group of donors, oxygen as acceptor;GO:0016645//oxidoreductase activity, acting on the CH-NH group of donors	GO:0009690//cytokinin metabolic process;GO:0044710//single-organism metabolic process
MSTRG.59590	--	0.23	0.34	0.46	1.13	2.14	0.69	0.04	0.02	0.04	0.0333	1.32	0.3433	-1.942856093	0.026155905	0.314834051	-3.364572432	0.001375014	0.033015188	Harbinger transposase-derived protein [Arabidopsis suecica]	-	-	-	-
MSTRG.59715	--	2.7	13.55	14.76	15.72	17.09	5.38	0.49	0.17	1.84	0.8333	12.73	10.3367	-0.300461394	0.643253401	0.984859178	-3.632733526	0.000181157	0.007988893	hypothetical protein DY000_02031378 [Brassica cretica]	-	-	-	-
MSTRG.59789	HOP2	0.45	0.66	0.5	1.06	1.21	1.03	0.11	0.08	0.08	0.09	1.1	0.5367	-1.035405336	0.263089934	0.86568552	-2.576029376	0.001071859	0.027759427	Hsp70-Hsp90 organizing protein 1 [Glycine max]	-	-	GO:0031072//heat shock protein binding	GO:0009408//response to heat;GO:0009409//response to cold;GO:0035966//response to topologically incorrect protein;GO:0043623//cellular protein complex assembly
MSTRG.59845	HMA5	0.05	0.05	0.03	0.84	0.95	0.7	0.55	1.55	0.03	0.71	0.83	0.0433	-4.259562214	1.87E-07	6.20E-05	4.034269902	0.001456289	0.034445421	PREDICTED: probable copper-transporting ATPase HMA5 [Brassica oleracea var. oleracea] [Brassica oleracea]	ko04016//MAPK signaling pathway - plant	GO:0031224//intrinsic component of membrane	GO:0032550//purine ribonucleoside binding;GO:0043682//copper-transporting ATPase activity;GO:0046914//transition metal ion binding	GO:0010038//response to metal ion;GO:0035434//copper ion transmembrane transport;GO:0061687//detoxification of inorganic compound
MSTRG.59948	--	0.76	0.34	0.94	1.18	0.84	0.35	0	0.06	0	0.02	0.79	0.68	-0.216317907	0.63499277	0.984859178	-5.087462841	0.002104686	0.044201257	nucleolin 1-like [Brassica napus]	-	-	-	-
MSTRG.60026	--	0.99	2.46	2.17	25.16	6.67	2.87	0.32	0.11	0.1	0.1767	11.5667	1.8733	-2.626293627	0.016620753	0.244331914	-3.406505866	0.001398013	0.033433202	BnaC05g26530D [Brassica napus]	-	-	-	-
MSTRG.60036	--	1.67	2.21	2.18	10.65	18.53	2.24	0.08	0	0.11	0.0633	10.4733	2.02	-2.374293482	0.008048023	0.158379448	-4.99524647	3.27E-10	2.05E-07	Harbinger transposase-derived protein [Arabidopsis suecica]	-	-	-	-
MSTRG.60114	SSL9	2.12	3.11	4.52	0.58	0.49	0.74	19.05	11.25	21.12	17.14	0.6033	3.25	2.429412522	6.38E-07	0.000153996	2.398855486	6.64E-07	0.000109137	protein STRICTOSIDINE SYNTHASE-LIKE 9 [Brassica rapa]	-	GO:0009536//plastid	GO:0016843//amine-lyase activity	GO:0009411//response to UV;GO:0009812//flavonoid metabolic process;GO:0009820//alkaloid metabolic process;GO:0016129//phytosteroid biosynthetic process;GO:0034285//response to disaccharide
MSTRG.60418	DOF1.3	14.8	16.2	15.68	2.68	2.14	4.17	25.37	30.58	22.63	26.1933	2.9967	15.56	2.37641154	9.99E-09	6.46E-06	0.751357607	0.000737788	0.02176055	BnaC05g50970D [Brassica napus]	-	GO:0043231//intracellular membrane-bounded organelle	GO:0001071//nucleic acid binding transcription factor activity;GO:0003676//nucleic acid binding	GO:0010468//regulation of gene expression;GO:0048506//regulation of timing of meristematic phase transition
MSTRG.60579	--	0.08	0.43	1.41	0.04	0	0	0	0.04	1.13	0.39	0.0133	0.64	5.584962501	0.000630199	0.029903715	-0.714597781	0.680962323	0.92185018	hypothetical protein F2Q70_00027584 [Brassica cretica]	-	-	-	-
MSTRG.61006	RBG7	28.01	33.37	29.48	47.22	58.56	37.33	10.29	11.65	17.56	13.1667	47.7033	30.2867	-0.655407275	0.587120892	0.984859178	-1.201792652	0.000511061	0.016793512	BnaUnng05060D [Brassica napus]	-	-	-	-
MSTRG.61050	At2g31390	0.08	1.99	1.5	0	0	0.08	0.03	0	4.63	1.5533	0.0267	1.19	5.479780264	0.000293126	0.017724228	0.384405881	0.844087293	0.937838626	dihydroflavonol 4-reductase/flavanone protein [Arabidopsis thaliana]	-	GO:0005911//cell-cell junction;GO:0031224//intrinsic component of membrane;GO:0043231//intracellular membrane-bounded organelle	-	-
MSTRG.61169	--	0	0	0	0.1	0	0	0.85	1.39	0.62	0.9533	0.0333	0	-5.058893689	0.919717722	0.984859178	9.896836931	0.001240491	0.030665551	Expressed protein [Arabidopsis thaliana]	-	-	-	-
MSTRG.61369	--	0	3.35	3.22	0	0.06	0	0	0	0.99	0.33	0.02	2.19	6.77478706	0.00044393	0.023392018	-2.73039294	0.227213688	0.629980573	hypothetical protein F2Q70_00022632 [Brassica cretica]	-	-	-	-
MSTRG.61410	SPH5	1.44	1.06	0.45	24.77	14.62	2.24	0.02	0.02	0.22	0.0867	13.8767	0.9833	-3.818836699	2.23E-05	0.002589683	-3.504131426	0.000557475	0.017806892	Harbinger transposase-derived protein [Arabidopsis suecica]	-	-	-	-
MSTRG.61461	--	0.09	0.48	0.6	0.91	0.31	0.05	0	0	0.03	0.01	0.4233	0.39	-0.118319967	0.568806832	0.984859178	-5.285402219	0.001808103	0.03978902	BnaAnng10430D [Brassica napus]	ko03420//Nucleotide excision repair;ko03440//Homologous recombination;ko03030//DNA replication;ko03430//Mismatch repair	-	-	-
MSTRG.61492	--	10.59	6.19	4.39	8.52	5.86	8.72	14.21	25.6	12.51	17.44	7.7	7.0567	-0.125871582	0.539982921	0.984859178	1.305341271	0.002471255	0.049239539	hypothetical protein DY000_02022875 [Brassica cretica]	-	-	-	-
MSTRG.61713	--	0.16	2.33	1.46	0.05	0.23	0.05	0	0.1	2.47	0.8567	0.11	1.3167	3.581314724	0.000923109	0.038522173	-0.620084294	0.711127791	0.931552167	BnaCnng13930D [Brassica napus]	-	GO:0043231//intracellular membrane-bounded organelle	-	GO:0006486//protein glycosylation
MSTRG.61762	GSTT2	0.07	0.19	0.16	0.54	0.85	0.11	0	0	0	0	0.5	0.14	-1.836501268	0.210637699	0.810988257	-7.129283017	0.002215075	0.045924122	Harbinger transposase-derived protein [Arabidopsis suecica]	-	-	-	-
MSTRG.61917	--	1.79	2.4	2.38	0.71	0.26	0.66	1.86	1.15	2.55	1.8533	0.5433	2.19	2.011021406	5.11E-06	0.000818943	-0.240808488	0.672881575	0.916847053	80A08_13 [Brassica rapa subsp. pekinensis] [Brassica rapa]	-	-	-	-
MSTRG.61958	SPH11	0	0	0.09	2.81	4.85	0.38	0	0	0.09	0.03	2.68	0.03	-6.48112669	0.000619457	0.02958212	0	0.98790717	0.996437868	BnaC04g43640D [Brassica napus]	-	-	-	-
MSTRG.61960	SPH11	3.83	18.73	15.4	27.99	88.65	12.68	0.08	0	0.46	0.18	43.1067	12.6533	-1.768393515	0.157920351	0.727292636	-6.135376775	1.53E-08	5.12E-06	BnaC04g43640D [Brassica napus]	-	-	-	-
MSTRG.62023	--	2.35	4.02	4.54	8.58	14.46	3.16	0.87	0.14	0.85	0.62	8.7333	3.6367	-1.26391571	0.253538064	0.854468415	-2.552276575	0.001093942	0.028134547	unnamed protein product [Brassica napus]	-	-	-	-
MSTRG.62136	--	0.64	1.18	2.55	3.08	3.82	1.11	0.08	0.12	0.04	0.08	2.67	1.4567	-0.874168963	0.703606763	0.984859178	-4.186526969	3.31E-05	0.002242622	Profilin superfamily [Arabidopsis thaliana x Arabidopsis arenosa]	-	GO:0043231//intracellular membrane-bounded organelle	-	GO:0006631//fatty acid metabolic process;GO:0007010//cytoskeleton organization
MSTRG.62349	BZIP17	0.1	0.13	0.09	0.34	0.34	0.94	1.61	1.48	0.31	1.1333	0.54	0.1067	-2.339850003	0.068964489	0.516057422	3.409390936	0.000598883	0.018654079	PREDICTED: bZIP transcription factor 17 [Brassica oleracea var. oleracea] [Brassica oleracea]	-	GO:0043231//intracellular membrane-bounded organelle	GO:0001071//nucleic acid binding transcription factor activity;GO:0003677//DNA binding	GO:0006355//regulation of transcription, DNA-templated;GO:0006972//hyperosmotic response;GO:0007165//signal transduction;GO:0042221//response to chemical
MSTRG.62959	--	2.34	0.63	0.28	1.05	0.92	1.54	5.77	13.97	4.86	8.2	1.17	1.0833	-0.111031312	0.791554279	0.984859178	2.920146692	0.000109334	0.005438492	transmembrane protein [Arabidopsis thaliana]	-	-	-	-
MSTRG.62973	--	0.38	0.28	0.22	0	0.35	0.51	3.45	8.74	3.54	5.2433	0.2867	0.2933	0.033166864	0.814314706	0.984859178	4.159871337	2.79E-09	1.21E-06	PREDICTED: phosphatidylinositol 4-kinase gamma 3-like isoform X2 [Raphanus sativus]	-	-	-	-
MSTRG.63106	CRU4	6.09	32.36	35.1	1.28	4.48	3.71	13.09	3.85	27.95	14.9633	3.1567	24.5167	2.957289011	5.72E-05	0.005340964	-0.712331245	0.444516075	0.833569496	cruciferin cru4 subunit, partial [Brassica napus]	-	GO:0005783//endoplasmic reticulum	-	GO:0009409//response to cold;GO:0009639//response to red or far red light;GO:0009685//gibberellin metabolic process;GO:0009737//response to abscisic acid;GO:0009756//carbohydrate mediated signaling;GO:0009793//embryo development ending in seed dormancy;GO:0032446//protein modification by small protein conjugation;GO:0048507//meristem development;GO:0048580//regulation of post-embryonic developmen…
MSTRG.63337	--	1.15	4.31	3.95	6.59	6.94	2.86	0.11	0.04	0.67	0.2733	5.4633	3.1367	-0.800549226	0.736974843	0.984859178	-3.520498908	0.000597132	0.018614757	Harbinger transposase-derived protein [Arabidopsis suecica]	-	-	-	-
MSTRG.63440	--	10.41	8.39	8.53	15.4	19.76	28.84	16.31	22.26	20.76	19.7767	21.3333	9.11	-1.227586445	0.080451194	0.552250207	1.118276323	1.45E-07	3.25E-05	-	-	-	-	-
MSTRG.63460	--	16.22	15.82	14.38	42.2	41.11	32.03	8.97	2.85	9.73	7.1833	38.4467	15.4733	-1.3130745	0.000509226	0.025736232	-1.107058653	0.064614137	0.338297932	metallothionein-like protein [Brassica napus]	-	-	GO:0046914//transition metal ion binding	GO:0001101//response to acid chemical;GO:0010038//response to metal ion;GO:0015698//inorganic anion transport
MSTRG.63732	At1g10320	5.63	4.43	5.16	5.37	7.1	7.73	11.89	33.74	8.4	18.01	6.7333	5.0733	-0.408386934	0.973253425	0.994231292	1.827792323	0.000696984	0.020879902	zinc finger CCCH domain-containing protein 5 [Brassica rapa]	-	GO:0043231//intracellular membrane-bounded organelle	GO:0003676//nucleic acid binding;GO:0036094//small molecule binding;GO:0043169//cation binding	-
MSTRG.63863	GSTT3	3.21	0.42	0.43	10.47	0.91	0.42	0.16	0.1	0.09	0.1167	3.9333	1.3533	-1.539235227	0.498415328	0.984859178	-3.5360529	0.0004352	0.014908914	PREDICTED: LOW QUALITY PROTEIN: golgin subfamily A member 6-like protein 1 [Brassica oleracea var. oleracea] [Brassica oleracea]	-	GO:0043231//intracellular membrane-bounded organelle	-	-
MSTRG.6405	--	2.33	3.62	2.99	0.15	0.54	6.41	33.26	74.48	8.51	38.75	2.3667	2.98	0.332455807	0.702446175	0.984859178	3.700812075	5.47E-07	9.26E-05	hypothetical protein IGI04_040385 [Brassica rapa subsp. trilocularis] [Brassica rapa]	-	-	-	-
MSTRG.64074	--	0.27	0.68	0.7	1.43	0.75	0.1	0	0	0	0	0.76	0.55	-0.4665678	0.828775963	0.984859178	-9.103287808	0.000835256	0.023469139	PREDICTED: protein XRI1-like [Raphanus sativus]	-	-	-	-
MSTRG.64114	BGLU19	37.9	11.7	11.62	3.43	4.08	14.33	91.97	97.97	87.51	92.4833	7.28	20.4067	1.487030189	0.04086467	0.397517208	2.180152853	3.84E-06	0.000437944	LOW QUALITY PROTEIN: beta-glucosidase 19-like [Brassica rapa]	ko01100//Metabolic pathways;ko01110//Biosynthesis of secondary metabolites;ko00940//Phenylpropanoid biosynthesis;ko00500//Starch and sucrose metabolism;ko00460//Cyanoamino acid metabolism	GO:0005911//cell-cell junction;GO:0009526//plastid envelope;GO:0042579//microbody;GO:0044432//endoplasmic reticulum part	GO:0005543//phospholipid binding;GO:0008422//beta-glucosidase activity;GO:0016791//phosphatase activity;GO:0019899//enzyme binding;GO:0046914//transition metal ion binding;GO:0046983//protein dimerization activity	GO:0000003//reproduction;GO:0006091//generation of precursor metabolites and energy;GO:0006470//protein dephosphorylation;GO:0006568//tryptophan metabolic process;GO:0006605//protein targeting;GO:0006714//sesquiterpenoid metabolic process;GO:0006873//cellular ion homeostasis;GO:0006996//organelle organization;GO:0009267//cellular response to starvation;GO:0009409//response to cold;GO:0009608//res…
MSTRG.64291	XCP2	1.19	1.69	2.75	0.66	3.74	4.29	4.02	7.69	4.43	5.38	2.8967	1.8767	-0.626221255	0.750615406	0.984859178	1.519433751	0.002464939	0.049152828	cysteine protease XCP2 [Brassica rapa]	-	GO:0005773//vacuole;GO:0009536//plastid;GO:0016020//membrane;GO:0030312//external encapsulating structure	GO:0016491//oxidoreductase activity;GO:0070011//peptidase activity, acting on L-amino acid peptides	GO:0012501//programmed cell death;GO:0019538//protein metabolic process;GO:0044710//single-organism metabolic process;GO:0045491//xylan metabolic process;GO:0048509//regulation of meristem development
MSTRG.64383	--	0.12	0.36	0.23	2.46	2.55	0.97	0.06	0	0	0.02	1.9933	0.2367	-3.074254555	0.001256842	0.047540379	-3.564784619	0.067186486	0.345262967	BnaC09g43340D [Brassica napus]	-	-	-	-
MSTRG.64441	--	0.1	0.03	0.03	3.57	0.82	0.43	0.01	0.15	0.07	0.0767	1.6067	0.0533	-4.912889336	5.48E-06	0.000860179	0.523561956	0.651726641	0.913487456	BnaC07g15840D [Brassica napus]	-	-	-	-
MSTRG.64444	--	0.37	0.34	0.23	11.47	1.52	1.25	0.04	0.07	0.38	0.1633	4.7467	0.3133	-3.921144579	0.000151997	0.010999307	-0.939879008	0.20925886	0.606744558	BnaC07g15840D [Brassica napus]	-	-	-	-
MSTRG.64759	--	1.68	1.16	0.52	6.4	8.93	3.71	2.14	1.62	0.17	1.31	6.3467	1.12	-2.502500341	0.000628165	0.029841642	0.226068079	0.758682116	0.931552167	hypothetical protein F2Q70_00043773 [Brassica cretica]	-	-	-	-
MSTRG.64936	--	97.79	66.08	68.79	85.29	152.53	106.07	205.92	321.29	112.57	213.26	114.63	77.5533	-0.563723967	0.750472908	0.984859178	1.459352696	0.0004218	0.014574972	-	-	-	-	-
MSTRG.65047	CIPK12	1.37	0.93	0.57	0.94	0.97	1.69	2.17	4.54	2.15	2.9533	1.2	0.9567	-0.32694617	0.943469796	0.989652401	1.626255962	0.001768398	0.039181439	PREDICTED: CBL-interacting serine/threonine-protein kinase 12-like isoform X2 [Raphanus sativus]	-	GO:0016020//membrane	GO:0004672//protein kinase activity;GO:0032550//purine ribonucleoside binding	GO:0000904//cell morphogenesis involved in differentiation;GO:0006464//cellular protein modification process;GO:0006796//phosphate-containing compound metabolic process;GO:0009664//plant-type cell wall organization;GO:0019932//second-messenger-mediated signaling
MSTRG.65175	--	0.7	1.2	0.91	0.38	2.78	3.35	2.75	4.11	3.56	3.4733	2.17	0.9367	-1.212087413	0.350869824	0.933539179	1.890713242	3.01E-05	0.002080516	BnaUnng00540D [Brassica napus]	-	GO:0009532//plastid stroma	GO:0017111//nucleoside-triphosphatase activity;GO:0032550//purine ribonucleoside binding;GO:0043021//ribonucleoprotein complex binding	GO:0006779//porphyrin-containing compound biosynthetic process
MSTRG.65347	At5g14285	0.16	0.04	0.03	0.6	0.82	0.57	0.2	1.05	0.18	0.4767	0.6633	0.0767	-3.113062664	0.001073103	0.042880389	2.636309381	0.01586974	0.156840757	ribulose-1,5 bisphosphate carboxylase/oxygenase large subunit N-methyltransferase, chloroplastic-like [Brassica napus]	-	GO:0009532//plastid stroma	GO:0003824//catalytic activity	GO:0008152//metabolic process
MSTRG.65401	PSI2	1.46	1.29	1.35	1.87	2.29	2.2	2.36	3.97	2.66	2.9967	2.12	1.3667	-0.633402856	0.630182182	0.984859178	1.132697206	0.000215408	0.00910675	BnaC05g23750D [Brassica napus]	-	-	-	-
MSTRG.65465	XYLA	1.03	0.55	0.86	0.64	0.89	0.88	1.7	1.69	3.19	2.1933	0.8033	0.8133	0.017848001	0.402267391	0.960880107	1.431206436	0.00224654	0.046268007	BnaC05g13980D [Brassica napus]	ko04141//Protein processing in endoplasmic reticulum	GO:0030120//vesicle coat	GO:0046914//transition metal ion binding	GO:0006006//glucose metabolic process;GO:0006970//response to osmotic stress;GO:0006996//organelle organization;GO:0015031//protein transport;GO:0016192//vesicle-mediated transport;GO:0016482//cytoplasmic transport;GO:0032989//cellular component morphogenesis;GO:0040007//growth;GO:0070838//divalent metal ion transport
MSTRG.65472	RACK1B	0.45	0.55	0.38	0.65	0.7	0.52	1.26	1.81	0.9	1.3233	0.6233	0.46	-0.438370003	0.917005218	0.984859178	1.52447074	0.002285071	0.046776579	PREDICTED: receptor for activated C kinase 1B [Brassica oleracea var. oleracea] [Brassica oleracea]	-	GO:0005840//ribosome;GO:0009536//plastid;GO:0016020//membrane;GO:0043234//protein complex	GO:0004683//calmodulin-dependent protein kinase activity;GO:0005515//protein binding;GO:0060089//molecular transducer activity	GO:0003006//developmental process involved in reproduction;GO:0006006//glucose metabolic process;GO:0006090//pyruvate metabolic process;GO:0006221//pyrimidine nucleotide biosynthetic process;GO:0006970//response to osmotic stress;GO:0009451//RNA modification;GO:0009737//response to abscisic acid;GO:0009746//response to hexose;GO:0009755//hormone-mediated signaling pathway;GO:0010038//response to …
MSTRG.65510	SD31	1.41	0.85	1.1	1.82	1.83	2.34	2.21	3.58	2.02	2.6033	1.9967	1.12	-0.83409477	0.368940352	0.94765265	1.216861315	0.001110223	0.028435575	PREDICTED: plant intracellular Ras-group-related LRR protein 5-like [Brassica oleracea var. oleracea] [Brassica oleracea]	-	GO:0016020//membrane	GO:0004672//protein kinase activity;GO:0005488//binding	GO:0003006//developmental process involved in reproduction;GO:0006796//phosphate-containing compound metabolic process;GO:0007154//cell communication;GO:0007275//multicellular organism development
MSTRG.65517	POP2	2.29	1.12	1.2	6.69	6.39	3.45	1.54	1.72	1.26	1.5067	5.51	1.5367	-1.842248069	0.000958441	0.039653736	-0.028443978	0.92591715	0.977218469	BnaC02g40020D [Brassica napus]	ko01100//Metabolic pathways;ko00250//Alanine, aspartate and glutamate metabolism;ko00650//Butanoate metabolism	GO:0031090//organelle membrane;GO:0043231//intracellular membrane-bounded organelle;GO:0044444//cytoplasmic part	GO:0003867//4-aminobutyrate transaminase activity;GO:0046914//transition metal ion binding	GO:0000904//cell morphogenesis involved in differentiation;GO:0005984//disaccharide metabolic process;GO:0006105//succinate metabolic process;GO:0006970//response to osmotic stress;GO:0009063//cellular amino acid catabolic process;GO:0009064//glutamine family amino acid metabolic process;GO:0010033//response to organic substance;GO:0010038//response to metal ion;GO:0019751//polyol metabolic proce…
MSTRG.65562	--	0.37	0.61	0.28	1.85	1.19	0.87	0.04	0.08	0.05	0.0567	1.3033	0.42	-1.633744874	0.008989874	0.169709209	-2.889817082	0.000619518	0.019052885	non-LTR retroelement reverse transcriptase-like protein [Arabidopsis thaliana]	-	-	-	-
MSTRG.65719	OTU11	1.43	0.74	1.04	0.91	1.32	1.08	2.15	4.69	2.36	3.0667	1.1033	1.07	-0.04425792	0.407372172	0.963522297	1.519060564	0.000721259	0.021397397	PREDICTED: LOW QUALITY PROTEIN: OTU domain-containing protein DDB_G0284757 [Brassica oleracea var. oleracea] [Brassica oleracea]	-	GO:0009536//plastid;GO:0016020//membrane	GO:0070011//peptidase activity, acting on L-amino acid peptides	GO:0019538//protein metabolic process
MSTRG.65817	--	0.08	0.3	0.08	12.81	11.83	0.9	0.04	0	0	0.0133	8.5133	0.1533	-5.794980854	3.23E-07	9.20E-05	-3.523561956	0.093628223	0.410449023	protein ALP1-like isoform X1 [Brassica rapa]	-	-	-	-
MSTRG.65902	dVPE	4.95	9.95	13.88	46.37	62.97	19.69	0.03	0.01	0	0.0133	43.01	9.5933	-2.16456804	0.005406306	0.124627586	-9.490850877	6.42E-10	3.70E-07	vacuolar-processing enzyme delta-isozyme isoform X1 [Brassica napus]	-	GO:0005618//cell wall;GO:0005773//vacuole;GO:0009536//plastid;GO:0044421//extracellular region part	GO:0004175//endopeptidase activity	GO:0003006//developmental process involved in reproduction;GO:0006950//response to stress;GO:0008219//cell death;GO:0009685//gibberellin metabolic process;GO:0010260//organ senescence;GO:0010476//gibberellin mediated signaling pathway;GO:0016192//vesicle-mediated transport;GO:0016485//protein processing;GO:0061024//membrane organization
MSTRG.66134	--	0.18	0	0	7.84	1.2	0.49	0	0	0.05	0.0167	3.1767	0.06	-5.726407402	0.00102437	0.041481922	-1.847996907	0.730430586	0.931552167	BnaC06g03220D [Brassica napus]	-	-	-	-
MSTRG.66202	accB	5.26	7.28	7.29	13.18	12.14	4.78	3.02	2.15	3.18	2.7833	10.0333	6.61	-0.602078809	0.973490084	0.994231292	-1.247836575	0.00168332	0.03787897	PREDICTED: biotin carboxyl carrier protein of acetyl-CoA carboxylase [Brassica oleracea var. oleracea] [Brassica oleracea]	-	GO:0009536//plastid	-	GO:0006873//cellular ion homeostasis;GO:0030001//metal ion transport
MSTRG.66230	SBT1.7	0.71	0.99	0.92	2.04	4.71	1.19	0.15	0.09	0.04	0.0933	2.6467	0.8733	-1.599572196	0.070410572	0.521363301	-3.226068079	3.89E-06	0.000440764	PREDICTED: subtilisin-like protease SBT1.7 [Brassica oleracea var. oleracea] [Brassica oleracea]	-	GO:0005576//extracellular region;GO:0005618//cell wall	GO:0004175//endopeptidase activity;GO:0005515//protein binding	GO:0003006//developmental process involved in reproduction;GO:0009892//negative regulation of metabolic process;GO:0010191//mucilage metabolic process;GO:0019538//protein metabolic process;GO:0044702//single organism reproductive process
MSTRG.66342	argS	32.11	15.17	19.16	1.82	1.06	31.4	38.86	45.76	58.7	47.7733	11.4267	22.1467	0.954684964	0.371144725	0.949581619	1.10911597	0.000743054	0.021833025	arginine--tRNA ligase, cytoplasmic-like isoform X1 [Zingiber officinale]	ko00970//Aminoacyl-tRNA biosynthesis	-	-	-
MSTRG.66499	--	6.55	3.75	3.19	5.76	4.8	6.15	9.3	12.18	7.1	9.5267	5.57	4.4967	-0.308821385	0.789015617	0.984859178	1.083115568	0.002117033	0.044340778	Beta-1,3-glucosyltransferase [Gossypium australe]	-	-	GO:0016740//transferase activity	-
MSTRG.66600	--	11.08	39.21	37.35	7.91	5.25	9.85	10.49	20.32	47.77	26.1933	7.67	29.2133	1.929328501	0.000270774	0.016753474	-0.157427317	0.824620905	0.931552167	hypothetical protein F2Q69_00032001 [Brassica cretica]	-	-	-	-
MSTRG.66616	AVT1C	0.11	3.09	3.45	0.54	0.12	0.1	0	0	0.05	0.0167	0.2533	2.2167	3.129283017	0.000867727	0.03707862	-7.055282436	1.91E-05	0.001475626	BnaA04g22360D, partial [Brassica napus]	-	-	-	-
MSTRG.66707	TOP2	0	1.78	2.02	0	0	0	0	0	1.7	0.5667	0	1.2667	10.3068212	0.00106855	0.04278528	-1.160464672	0.624525575	0.913487456	PREDICTED: DNA topoisomerase 2-like [Brassica oleracea var. oleracea] [Brassica oleracea]	-	-	-	-
MSTRG.66754	HSP90-6	0.57	0.19	0.08	0.74	0.26	0.27	1.21	4.26	0.53	2	0.4233	0.28	-0.596367264	0.919332463	0.984859178	2.836501268	0.002202543	0.045719283	BnaC05g44190D [Brassica napus]	ko04626//Plant-pathogen interaction;ko04141//Protein processing in endoplasmic reticulum	GO:0009532//plastid stroma;GO:0030312//external encapsulating structure	GO:0005515//protein binding	GO:0044267//cellular protein metabolic process;GO:0050896//response to stimulus
MSTRG.66826	SAE1A	215.82	51.3	53.52	11.9	1.4	344.29	396.23	394.63	547.37	446.0767	119.1967	106.88	-0.157351978	1	1	2.061299773	0.000221295	0.009273711	BnaAnng25940D, partial [Brassica napus]	ko04120//Ubiquitin mediated proteolysis	-	-	-
MSTRG.66827	--	21.13	2.68	3.16	1.41	0.06	35.91	44.38	40.85	66.94	50.7233	12.46	8.99	-0.470911048	1	1	2.496256536	0.000564963	0.017957341	BnaC02g23500D [Brassica napus]	ko03420//Nucleotide excision repair;ko03440//Homologous recombination;ko03030//DNA replication;ko03430//Mismatch repair	-	-	-
MSTRG.67385	--	3.37	2	1.47	5.81	0.1	0	0	0	0	0	1.97	2.28	0.210838195	0.532572765	0.984859178	-11.15481811	5.28E-06	0.00055266	-	-	-	-	-
MSTRG.67389	YUC10	0.94	1.19	0.95	5.17	0.09	0.03	0.03	0	0.25	0.0933	1.7633	1.0267	-0.780337371	1	1	-3.459431619	0.002221737	0.045968535	probable indole-3-pyruvate monooxygenase YUCCA10 [Brassica rapa]	ko01100//Metabolic pathways;ko00380//Tryptophan metabolism	-	GO:0000166//nucleotide binding;GO:0016709//oxidoreductase activity, acting on paired donors, with incorporation or reduction of molecular oxygen, NAD(P)H as one donor, and incorporation of one atom of oxygen	GO:0009653//anatomical structure morphogenesis;GO:0009850//auxin metabolic process;GO:0042743//hydrogen peroxide metabolic process;GO:0044710//single-organism metabolic process
MSTRG.67396	YUC10	0.15	0.52	0.75	1.58	0	0	0	0	0.02	0.0067	0.5267	0.4733	-0.154033629	0.721036934	0.984859178	-6.14974712	0.000264716	0.010506468	BnaAnng35650D, partial [Brassica napus]	-	-	-	-
MSTRG.67400	At1g26850	0.22	3.9	3.57	0	0.04	0	0	0.13	1.51	0.5467	0.0133	2.5633	7.586839788	1.11E-06	0.000245908	-2.229287783	0.143644565	0.508650666	probable methyltransferase PMT2 [Arachis ipaensis]	-	-	-	-
MSTRG.67414	CYCA3-4	1.65	1.41	1.54	5.78	1.14	0.73	0.56	0.64	0.63	0.61	2.55	1.5333	-0.733825887	0.995157118	0.998298756	-1.329790213	1.23E-06	0.000178087	PREDICTED: cyclin-A3-4-like isoform X1 [Brassica oleracea var. oleracea] [Brassica oleracea]	ko03010//Ribosome	-	-	-
MSTRG.67543	--	0.02	0	0.09	3.5	0.91	0.35	0.07	0.02	0	0.03	1.5867	0.0367	-5.435386145	8.68E-05	0.007355667	-0.289506617	0.915330934	0.972202272	BnaC07g15840D [Brassica napus]	-	-	-	-
MSTRG.6764	--	2.8	7.05	6.95	13.78	8.27	7.7	0.92	0.16	1.59	0.89	9.9167	5.6	-0.824428435	0.581567052	0.984859178	-2.653549586	0.001512025	0.035355004	Reverse transcriptase domain [Arabidopsis suecica]	-	-	-	-
MSTRG.6766	--	2.84	7.1	7.96	14.63	22.34	7.36	0.52	0	1.12	0.5467	14.7767	5.9667	-1.308323775	0.199231401	0.795302994	-3.448191868	0.002476185	0.049312492	hypothetical protein F2Q69_00001709 [Brassica cretica]	-	-	-	-
MSTRG.67942	--	0	0.05	0.32	4.73	1.32	1.26	0	0	0.87	0.29	2.4367	0.1233	-4.30427423	0.001354158	0.049842595	1.23349013	0.670068385	0.916131306	Reverse transcriptase RNA-dependent DNA polymerase [Arabidopsis suecica]	-	-	-	-
MSTRG.67943	RE2	0.18	0.47	0.32	8.98	2.05	2.16	0.05	0.03	0.58	0.22	4.3967	0.3233	-3.765316007	1.08E-05	0.001468633	-0.555518723	0.68003427	0.92173334	01P13-1 [Brassica rapa subsp. pekinensis] [Brassica rapa]	-	-	-	-
MSTRG.67964	--	0.58	0.43	0.45	1.14	0.14	0.15	0	0	0	0	0.4767	0.4867	0.029953222	0.491281401	0.984859178	-8.926790153	0.00081794	0.023212324	plectin [Brassica rapa]	-	-	-	-
MSTRG.68193	--	0.55	0.64	0.51	0.16	1.93	0	1.8	3.79	1.54	2.3767	0.6967	0.5667	-0.297968196	0.856187932	0.984859178	2.06836733	0.000956286	0.025708277	protein ALP1-like [Brassica napus]	-	-	-	-
MSTRG.68215	--	1.1	1.6	3.1	55.35	2.82	2.53	0	0	0.13	0.0433	20.2333	1.9333	-3.387571711	1	1	-5.479469372	0.000651832	0.019827061	BnaA05g36870D [Brassica napus]	-	-	-	-
MSTRG.68382	--	0.41	0.98	1.11	15.08	1.22	0.63	0.04	0.04	0.09	0.0567	5.6433	0.8333	-2.759581973	1	1	-3.878321443	0.000447228	0.015230253	Zinc finger CCHC-type [Arabidopsis suecica]	-	-	-	-
MSTRG.68488	TOPP2	0.23	14.38	16.68	0.07	0	0	0.07	0	0.58	0.2167	0.0233	10.43	8.804131021	1.20E-08	7.30E-06	-5.58911813	0.000218855	0.009217404	serine/threonine-protein phosphatase PP1 isozyme 2 [Brassica rapa]	ko03015//mRNA surveillance pathway	GO:0008287//protein serine/threonine phosphatase complex	GO:0004721//phosphoprotein phosphatase activity	GO:0003006//developmental process involved in reproduction;GO:0006796//phosphate-containing compound metabolic process;GO:0018205//peptidyl-lysine modification;GO:0042743//hydrogen peroxide metabolic process
MSTRG.68511	--	1.43	5.72	8.22	0.71	0.76	0.79	0.65	1.07	0.9	0.8733	0.7533	5.1233	2.765722487	5.18E-05	0.004981345	-2.552478448	0.001382775	0.033119716	hypothetical protein F2Q68_00036234 [Brassica cretica]	-	-	-	-
MSTRG.68555	SMZ	1.09	0.6	0.66	0.07	0	0.74	2.28	1.54	2.53	2.1167	0.27	0.7833	1.536666944	0.242592841	0.843671079	1.434095835	0.002477579	0.049327605	PREDICTED: AP2-like ethylene-responsive transcription factor SMZ [Brassica oleracea var. oleracea] [Brassica oleracea]	-	GO:0043231//intracellular membrane-bounded organelle	GO:0001071//nucleic acid binding transcription factor activity;GO:0003676//nucleic acid binding	GO:0000160//phosphorelay signal transduction system;GO:0003006//developmental process involved in reproduction;GO:0009653//anatomical structure morphogenesis;GO:0009657//plastid organization;GO:0010468//regulation of gene expression;GO:0034645//cellular macromolecule biosynthetic process;GO:0042221//response to chemical;GO:0044707//single-multicellular organism process
MSTRG.68882	--	0.11	0.22	0.04	3.79	0.62	0.69	0	0.03	0.06	0.03	1.7	0.1233	-3.784900071	0.000914109	0.038224369	-2.039528364	0.150805612	0.519757245	BnaC07g15840D [Brassica napus]	-	-	-	-
MSTRG.69022	CP29B	5.14	3.72	3.21	3.36	4.27	4.3	14.43	18.47	17.97	16.9567	3.9767	4.0233	0.016831633	0.262971654	0.865504506	2.075389418	1.29E-17	4.57E-14	BnaUnng05280D, partial [Brassica napus]	ko03420//Nucleotide excision repair;ko03440//Homologous recombination;ko03030//DNA replication;ko03430//Mismatch repair	-	-	-
MSTRG.69024	--	13.62	5.14	4.78	1.66	1	6.23	50.81	64.68	51.7	55.73	2.9633	7.8467	1.404858996	0.061019289	0.488145974	2.828302334	3.59E-10	2.22E-07	replication protein A 70 kDa DNA-binding subunit B-like isoform X2 [Brassica rapa]	ko03420//Nucleotide excision repair;ko03440//Homologous recombination;ko03030//DNA replication;ko03430//Mismatch repair	-	-	-
MSTRG.69026	CP29B	15.56	5.8	7.09	1	0.16	5.28	69.72	88.6	59.67	72.6633	2.1467	9.4833	2.143296059	0.037398701	0.378802672	2.937761397	4.43E-13	6.26E-10	BnaUnng05280D, partial [Brassica napus]	ko03420//Nucleotide excision repair;ko03440//Homologous recombination;ko03030//DNA replication;ko03430//Mismatch repair	-	-	-
MSTRG.69392	SRP72	0.35	2.85	4.33	0.6	0.39	0.55	0.15	0.18	0.35	0.2267	0.5133	2.51	2.289719514	0.001526368	0.05421119	-3.469043213	0.000215608	0.009110257	signal recognition particle subunit SRP72-like [Brassica napus]	ko03060//Protein export	-	-	-
MSTRG.69401	--	0.03	1.91	1.71	0	0.06	0.09	0.06	0.09	0.06	0.07	0.05	1.2167	4.604862058	0.000932688	0.038862621	-4.119435231	0.001768034	0.039181439	hypothetical protein DY000_02018265 [Brassica cretica]	-	-	-	-
MSTRG.69461	nmd3	0.99	3.8	3.29	0.53	0.33	0.74	1.09	1.78	0.95	1.2733	0.5333	2.6933	2.336283388	0.000147756	0.010779897	-1.080782655	0.092358092	0.407639202	60S ribosomal export protein NMD3-like [Brassica napus]	ko03013//Nucleocytoplasmic transport;ko03008//Ribosome biogenesis in eukaryotes	GO:0043231//intracellular membrane-bounded organelle;GO:0044444//cytoplasmic part	-	GO:0006886//intracellular protein transport;GO:0006996//organelle organization;GO:0009832//plant-type cell wall biogenesis
MSTRG.69500	--	0.8	3.21	4.87	1.5	1.14	0.38	0.15	0.15	0.15	0.15	1.0067	2.96	1.556011127	0.009036879	0.170319832	-4.30256277	3.69E-05	0.002417433	BnaCnng55650D [Brassica napus]	-	-	-	-
MSTRG.69510	CAMTA4	0	1.96	1.99	0.01	0.03	0.01	0	0	0.17	0.0567	0.0167	1.3167	6.303780748	3.43E-05	0.003639998	-4.538246002	0.189757244	0.579260917	PREDICTED: LOW QUALITY PROTEIN: calmodulin-binding transcription activator 4-like [Brassica oleracea var. oleracea] [Brassica oleracea]	-	-	-	-
MSTRG.69513	--	0.48	5.28	6.14	1.05	1.27	0.59	0.4	0.59	0.21	0.4	0.97	3.9667	2.031870515	0.005652241	0.128456182	-3.309855263	0.001497196	0.035118543	NADH-ubiquinone oxidoreductase 11kDa subunit [Arabidopsis thaliana x Arabidopsis arenosa]	-	-	-	-
MSTRG.69558	--	0.74	20.78	19.73	1.21	0.25	0.68	0.18	1.21	1.69	1.0267	0.7133	13.75	4.268711418	1.31E-05	0.001725425	-3.743391863	0.001190226	0.02978323	BnaC03g44790D [Brassica napus]	-	-	-	-
MSTRG.69611	--	0.95	10.29	12.13	0.73	0	0.15	0.23	0.49	0.68	0.4667	0.2933	7.79	4.7310104	1.00E-05	0.001382056	-4.061159002	3.25E-05	0.002209618	BnaC03g44790D [Brassica napus]	-	-	-	-
MSTRG.69686	AE7	0.05	1.42	1.78	0	0	0	0	0.05	0	0.0167	0	1.0833	10.0812615	9.50E-05	0.007801031	-6.022367813	0.001170614	0.029461453	PREDICTED: MIP18 family protein At1g68310 isoform X2 [Brassica oleracea var. oleracea] [Brassica oleracea]	-	-	-	-
MSTRG.69704	--	0	1.39	1.09	0	0	0	0	0	0	0	0	0.8267	9.691161905	0.000605365	0.02924967	-9.691161905	0.001906023	0.041338867	BnaA10g09250D [Brassica napus]	-	-	-	-
MSTRG.69738	--	2.89	1.2	0.88	0.75	0.32	1.69	5.81	6.85	8.86	7.1733	0.92	1.6567	0.848577585	0.189000831	0.779283226	2.114360321	9.04E-06	0.000836786	Transposon En/Spm-like [Arabidopsis thaliana x Arabidopsis arenosa]	-	-	-	-
MSTRG.69739	--	1.82	0.32	0.88	0.82	0.46	1.64	5.2	7.35	10.08	7.5433	0.9733	1.0067	0.04858018	0.696331251	0.984859178	2.90561613	1.70E-06	0.000229413	Zinc finger CCHC-type [Arabidopsis suecica]	-	-	-	-
MSTRG.69887	TUBA2	11.41	16.22	17.96	35.63	38.72	13.16	2.74	1.42	3.73	2.63	29.17	15.1967	-0.940730478	0.403516496	0.961299406	-2.530620204	5.23E-07	9.04E-05	tubulin alpha chain-like [Tripterygium wilfordii]	ko04145//Phagosome	GO:0005911//cell-cell junction;GO:0009532//plastid stroma;GO:0015630//microtubule cytoskeleton;GO:0030312//external encapsulating structure;GO:0031090//organelle membrane;GO:0043234//protein complex	GO:0005198//structural molecule activity;GO:0017111//nucleoside-triphosphatase activity;GO:0032550//purine ribonucleoside binding	GO:0006006//glucose metabolic process;GO:0006637//acyl-CoA metabolic process;GO:0006970//response to osmotic stress;GO:0006996//organelle organization;GO:0007017//microtubule-based process;GO:0009629//response to gravity;GO:0010038//response to metal ion;GO:0016192//vesicle-mediated transport;GO:0032989//cellular component morphogenesis;GO:0040007//growth;GO:0043623//cellular protein complex asse…
MSTRG.70007	--	5.37	4.74	4.87	1.14	0.77	3.75	9.87	10.91	11.21	10.6633	1.8867	4.9933	1.404163666	0.031526508	0.347932379	1.094583369	1.21E-06	0.000176272	BnaA09g29430D [Brassica napus]	-	-	-	-
MSTRG.70159	SCPL6	0.43	0	0.03	2.54	3.56	2.26	0.78	0.63	0	0.47	2.7867	0.1533	-4.183797176	0.001154903	0.044991322	1.615989396	0.36821384	0.779913948	serine carboxypeptidase-like 2 [Eutrema salsugineum]	-	GO:0005618//cell wall	GO:0004180//carboxypeptidase activity;GO:0016753//O-sinapoyltransferase activity	GO:0000097//sulfur amino acid biosynthetic process;GO:0006090//pyruvate metabolic process;GO:0006544//glycine metabolic process;GO:0006633//fatty acid biosynthetic process;GO:0006732//coenzyme metabolic process;GO:0006753//nucleoside phosphate metabolic process;GO:0009683//indoleacetic acid metabolic process;GO:0009694//jasmonic acid metabolic process;GO:0019538//protein metabolic process
MSTRG.70414	--	0.74	0.59	0.28	3.1	4.83	2.61	0	0	0.82	0.2733	3.5133	0.5367	-2.710742274	0.000302084	0.01811685	-0.973364873	0.631223199	0.913487456	PREDICTED: protein indeterminate-domain 6, chloroplastic-like [Brassica oleracea var. oleracea] [Brassica oleracea]	-	-	-	-
MSTRG.70489	At5g05010	0.35	0.4	0.22	0.29	0.4	0.1	5.81	5.99	1.32	4.3733	0.2633	0.3233	0.296132094	0.243014341	0.844099304	3.757639162	4.19E-08	1.17E-05	PREDICTED: coatomer subunit delta-like [Brassica oleracea var. oleracea] [Brassica oleracea]	-	GO:0005794//Golgi apparatus;GO:0005911//cell-cell junction;GO:0031410//cytoplasmic vesicle;GO:0044446//intracellular organelle part;GO:0098588//bounding membrane of organelle	-	GO:0006498//N-terminal protein lipidation;GO:0006810//transport
MSTRG.70721	UGE4	0.6	3.36	3.35	9.19	7.61	3.13	0	0.02	0.3	0.1067	6.6433	2.4367	-1.446998399	0.248346872	0.849190162	-4.513727596	0.000399442	0.014013959	BnaCnng11940D [Brassica napus]	ko01100//Metabolic pathways;ko04145//Phagosome;ko04070//Phosphatidylinositol signaling system;ko00562//Inositol phosphate metabolism	GO:0005794//Golgi apparatus	GO:0005515//protein binding;GO:0016857//racemase and epimerase activity, acting on carbohydrates and derivatives	GO:0009250//glucan biosynthetic process;GO:0010015//root morphogenesis;GO:0010396//rhamnogalacturonan II metabolic process;GO:0042546//cell wall biogenesis;GO:0045229//external encapsulating structure organization
MSTRG.70855	--	2.13	2.08	2.72	0.28	0.97	2.31	4.91	6.82	4.58	5.4367	1.1867	2.31	0.960978111	0.167415758	0.745107707	1.234829525	0.000402927	0.014104613	hypothetical protein DY000_02020704 [Brassica cretica]	-	-	-	-
MSTRG.71058	--	0.14	0.11	0.1	2.25	1.75	0.53	0	0.05	0.02	0.0233	1.51	0.1167	-3.694084223	9.92E-07	0.000224141	-2.321928095	0.075100816	0.365132777	BnaC04g55630D [Brassica napus]	-	-	-	-
MSTRG.71179	--	1.01	2.14	1.83	5.38	6.9	1.82	0.12	0	0.23	0.1167	4.7	1.66	-1.501477515	0.131905174	0.681479536	-3.830718915	0.000243376	0.009922266	hypothetical protein F2Q70_00008886 [Brassica cretica]	-	-	-	-
MSTRG.71207	At1g13609	4.84	1.75	1.56	46.15	6.14	4.5	0.29	0	0.37	0.22	18.93	2.7167	-2.800764947	0.015752509	0.237832744	-3.62626213	0.000776783	0.022459111	defensin-like protein 287 [Brassica rapa]	-	GO:0043231//intracellular membrane-bounded organelle	-	GO:0051704//multi-organism process
MSTRG.71346	HDG12	0.46	0.47	0.52	2.52	1.6	0.75	0.13	0.07	0.02	0.0733	1.6233	0.4833	-1.747868872	0.015415872	0.234166522	-2.720477471	0.001675346	0.037798362	BnaCnng65280D [Brassica napus]	-	GO:0043231//intracellular membrane-bounded organelle	GO:0001071//nucleic acid binding transcription factor activity;GO:0004177//aminopeptidase activity;GO:0043169//cation binding;GO:0044212//transcription regulatory region DNA binding	GO:0000904//cell morphogenesis involved in differentiation;GO:0006498//N-terminal protein lipidation;GO:0006508//proteolysis;GO:0009409//response to cold;GO:0009814//defense response, incompatible interaction;GO:0009827//plant-type cell wall modification;GO:0010467//gene expression
MSTRG.71414	--	19.55	11.72	10.57	12.03	13.24	9.41	28.3	39.2	25.99	31.1633	11.56	13.9467	0.270778953	0.01936834	0.267469565	1.159929206	0.00011305	0.005573448	BnaA10g12550D [Brassica napus]	-	-	-	-
MSTRG.71415	--	13.62	11.61	9.62	11.23	9.66	9.27	20.54	43.56	21.91	28.67	10.0533	11.6167	0.208522227	0.014321015	0.224011249	1.303345749	0.000344876	0.012683573	BnaA10g12550D [Brassica napus]	-	-	-	-
MSTRG.71454	TERT	4.23	5.84	5.08	11.6	10.39	6.13	1.38	1.61	1.29	1.4267	9.3733	5.05	-0.892278801	0.284746571	0.885518198	-1.823635092	9.96E-06	0.000906358	telomerase reverse transcriptase catalytic subunit [Arabidopsis thaliana]	-	GO:0043231//intracellular membrane-bounded organelle;GO:0098687//chromosomal region	GO:0003720//telomerase activity;GO:0043169//cation binding	GO:0006278//RNA-dependent DNA replication;GO:0006997//nucleus organization;GO:0051640//organelle localization
MSTRG.71463	--	0	0	0	0.62	2.38	2.88	0.73	0.73	0	0.4867	1.96	0	-10.93663794	7.93E-05	0.00686495	8.926790153	0.077690904	0.371615276	unnamed protein product [Brassica napus]	-	-	-	-
MSTRG.71528	Os05g0583200	0.06	0.65	0.76	0.04	0	0	0.02	0	0.55	0.19	0.0133	0.49	5.199672345	0.00020444	0.013694017	-1.366782331	0.409043495	0.810239608	PREDICTED: zinc finger BED domain-containing protein RICESLEEPER 2-like [Camelina sativa]	-	-	-	-
MSTRG.71780	--	1.84	1.28	1.83	0.15	0.2	1.23	5.93	11.03	3.26	6.74	0.5267	1.65	1.647503967	0.067193294	0.510044404	2.030282567	0.000184919	0.008101455	probable E3 ubiquitin-protein ligase XERICO [Capsella rubella]	-	-	GO:0046914//transition metal ion binding	-
MSTRG.71844	--	0.46	0.3	0.67	0	0	0.03	0.3	0.51	0.81	0.54	0.01	0.4767	5.574908836	3.48E-05	0.003689008	0.179978666	0.768951522	0.931552167	apoptosis inhibitory protein [Arabidopsis thaliana]	-	-	-	-
MSTRG.72115	PBL5	4.33	2.32	2.23	3.03	2.45	3.8	5.27	7.38	5.58	6.0767	3.0933	2.96	-0.063565129	0.497111857	0.984859178	1.03768298	0.002087867	0.043954893	probable serine/threonine-protein kinase PBL5 [Brassica rapa]	-	-	-	-
MSTRG.72181	--	0.11	0.62	0.39	0.3	0.69	0.13	0	0	0	0	0.3733	0.3733	0	0.535165588	0.984859178	-8.544320516	0.000449689	0.015294047	BnaA04g07310D [Brassica napus]	-	-	-	-
MSTRG.72310	--	2.44	1.57	2.04	0	0.02	1.6	5.09	4.47	11.22	6.9267	0.54	2.0167	1.900941329	0.221124568	0.824202297	1.780188607	0.000141537	0.006616313	defensin-like protein 210 [Arabidopsis lyrata subsp. lyrata] [Arabidopsis lyrata]	-	-	-	-
MSTRG.72312	--	8.86	5.45	6.74	0.11	0	7.35	29.74	28.54	50.6	36.2933	2.4867	7.0167	1.496572698	0.480196602	0.984859178	2.370846834	2.02E-11	1.74E-08	hypothetical protein DY000_02013129 [Brassica cretica]	-	-	-	-
MSTRG.72362	LHCA3	2.4	1.75	1.87	3.05	3.28	2.67	0.45	0.58	0.3	0.4433	3	2.0067	-0.580161514	0.787387619	0.984859178	-2.178337241	4.30E-05	0.0027064	PREDICTED: chlorophyll a-b binding protein 8, chloroplastic [Brassica oleracea var. oleracea] [Brassica oleracea]	ko00196//Photosynthesis - antenna proteins	GO:0009521//photosystem;GO:0031224//intrinsic component of membrane;GO:0031976//plastid thylakoid;GO:0044434//chloroplast part	GO:0043169//cation binding;GO:0046906//tetrapyrrole binding	GO:0000097//sulfur amino acid biosynthetic process;GO:0006091//generation of precursor metabolites and energy;GO:0006464//cellular protein modification process;GO:0009725//response to hormone
MSTRG.72616	RABD2B	0.2	1.24	0.93	0	0	0	0	0	2.02	0.6733	0	0.79	9.625708843	1.16E-05	0.001561265	-0.230531766	0.853219688	0.942664076	ras-related protein RABD2b-like isoform X1 [Ziziphus jujuba]	-	-	-	-
MSTRG.72789	--	0.54	0.05	0.13	0.03	0	0.39	1.69	4.06	2.38	2.71	0.14	0.24	0.777607579	0.541857227	0.984859178	3.497186541	2.89E-05	0.002016026	BnaC04g19560D [Brassica napus]	-	-	-	-
MSTRG.73108	CIP7	1.58	2.42	2.29	0.94	1.4	0.72	1.94	1.7	1.76	1.8	1.02	2.0967	1.039528364	0.000138352	0.010262973	-0.22010061	0.603838466	0.913487456	COP1-interacting protein 7 isoform X2 [Brassica rapa]	-	GO:0016020//membrane;GO:0044444//cytoplasmic part	-	-
MSTRG.73195	--	4.21	3.32	3.22	2.77	2.78	3.48	9.73	9.65	6.48	8.62	3.01	3.5833	0.251538767	0.1115706	0.638860046	1.266385615	6.62E-05	0.003734205	hypothetical protein Bca52824_027829 [Brassica carinata]	-	-	-	-
MSTRG.73196	--	4.21	3.32	3.22	2.77	2.78	3.48	9.73	9.65	6.48	8.62	3.01	3.5833	0.251538767	0.1115706	0.638860046	1.266385615	6.62E-05	0.003734205	hypothetical protein Bca52824_027829 [Brassica carinata]	-	-	-	-
MSTRG.73755	GMI1	1.05	2.19	2.43	2.38	2.2	1.18	0.34	0.19	0.52	0.35	1.92	1.89	-0.022720077	0.377917474	0.955094576	-2.432959407	0.001131963	0.02880363	LOW QUALITY PROTEIN: structural maintenance of chromosomes flexible hinge domain-containing protein GMI1 [Brassica rapa]	-	-	-	-
MSTRG.7402	--	7.14	6.82	7.04	15.01	0.43	0.08	0.17	0.23	1.16	0.52	5.1733	7	0.43626077	1	1	-3.750771394	3.93E-07	7.16E-05	BnaA09g26320D [Brassica napus]	-	-	-	-
MSTRG.7420	--	0.16	1.18	1.35	0	0	0	0	0	0.65	0.2167	0	0.8967	9.808427957	0.000360694	0.02040857	-2.04909455	0.262395483	0.674142387	unnamed protein product [Brassica napus]	-	-	-	-
MSTRG.74216	--	0.19	1.67	1.97	0.21	0.08	0.04	0.22	0.5	1.53	0.75	0.11	1.2767	3.536806463	0.000253727	0.015902645	-0.767419391	0.468762407	0.848186344	transcription termination factor MTERF8, chloroplastic [Brassica rapa]	-	GO:0009536//plastid	-	GO:0010468//regulation of gene expression
MSTRG.74336	--	0.39	0.62	0.47	1.36	0.88	0.22	0.07	0.05	0.13	0.0833	0.82	0.4933	-0.73306114	0.89056129	0.984859178	-2.565597176	7.01E-05	0.003892535	Ulp1 protease family protein [Brassica oleracea]	-	-	-	-
MSTRG.74365	CBR1	2.16	2.71	3.03	11.09	12.53	5.45	1.2	1.14	2.98	1.7733	9.69	2.6333	-1.879606513	0.000511994	0.025833671	-0.570426408	0.353619249	0.766479015	structure-specific endonuclease subunit slx1-like [Brassica napus]	-	GO:0043231//intracellular membrane-bounded organelle	GO:0004519//endonuclease activity	GO:0006259//DNA metabolic process
MSTRG.74372	TPS07	1.82	4.33	5.72	0.6	1.1	0.64	2.22	0.54	1.8	1.52	0.78	3.9567	2.3427395	1.55E-06	0.000311183	-1.380214205	0.062695428	0.333793155	terpenoid synthase 26 [Eutrema salsugineum]	-	GO:0005911//cell-cell junction;GO:0009536//plastid	-	GO:0006714//sesquiterpenoid metabolic process;GO:0046246//terpene biosynthetic process
MSTRG.74723	--	0	1.5	1.11	0	0	0	0	0	0.02	0.0067	0	0.87	9.764871591	0.030185851	0.341167897	-7.027905997	0.001027407	0.026985745	uncharacterized mitochondrial protein AtMg00810 [Brassica rapa]	-	-	-	-
MSTRG.74761	VTC2	0.26	6.16	4.45	0.56	1.06	0.26	0.25	0.24	0.47	0.32	0.6267	3.6233	2.531547373	0.001787663	0.06033123	-3.501173724	0.000381626	0.013619151	LOW QUALITY PROTEIN: GDP-L-galactose phosphorylase 1 [Brassica rapa]	ko01100//Metabolic pathways;ko01110//Biosynthesis of secondary metabolites;ko00053//Ascorbate and aldarate metabolism	GO:0043231//intracellular membrane-bounded organelle	GO:0004645//phosphorylase activity;GO:0008905//mannose-phosphate guanylyltransferase activity;GO:0035251//UDP-glucosyltransferase activity	GO:0000302//response to reactive oxygen species;GO:0001101//response to acid chemical;GO:0006605//protein targeting;GO:0006972//hyperosmotic response;GO:0009617//response to bacterium;GO:0009694//jasmonic acid metabolic process;GO:0009755//hormone-mediated signaling pathway;GO:0019852//L-ascorbic acid metabolic process;GO:0043067//regulation of programmed cell death
MSTRG.7487	--	1.13	0.07	0.21	0.57	4.77	6.16	3.51	3.19	3.49	3.3967	3.8333	0.47	-3.027866793	0.016807405	0.245741813	2.853386984	0.000600251	0.018674557	-	-	-	-	-
MSTRG.74898	--	1.08	14.66	14.64	0.16	0.65	1.07	0.7	0	8.64	3.1133	0.6267	10.1267	4.014317303	6.86E-05	0.006121066	-1.701627415	0.274608057	0.688261594	BnaCnng15630D [Brassica napus]	-	-	-	-
MSTRG.75031	--	0	1.17	1.34	0.05	0	0.02	0.02	0	7.78	2.6	0.0233	0.8367	5.164188632	0.001110015	0.043827991	1.63578676	1	1	BnaCnng50740D [Brassica napus]	-	-	-	GO:0015851//nucleobase transport
MSTRG.75074	XTH24	3.34	0.95	0.54	146.5	129.35	14.3	0.21	0.65	1.24	0.7	96.7167	1.61	-5.90863193	3.53E-10	3.97E-07	-1.201633861	0.235022764	0.640661788	PREDICTED: xyloglucan endotransglucosylase/hydrolase protein 24 [Brassica oleracea var. oleracea] [Brassica oleracea]	-	GO:0005576//extracellular region;GO:0005618//cell wall;GO:0009536//plastid;GO:0016020//membrane	GO:0046527//glucosyltransferase activity;GO:0052736//beta-glucanase activity	GO:0006073//cellular glucan metabolic process;GO:0006950//response to stress;GO:0009605//response to external stimulus;GO:0009733//response to auxin;GO:0009827//plant-type cell wall modification;GO:0010087//phloem or xylem histogenesis;GO:0010243//response to organonitrogen compound;GO:0010476//gibberellin mediated signaling pathway;GO:0044767//single-organism developmental process
MSTRG.75257	FEI2	0.07	1.94	1.9	0	0.06	0	0	0	2.77	0.9233	0.02	1.3033	6.026062297	0.000121322	0.009363729	-0.497282631	1	1	BnaC04g12200D [Brassica napus]	-	GO:0009536//plastid;GO:0031224//intrinsic component of membrane;GO:0042995//cell projection	GO:0008194//UDP-glycosyltransferase activity;GO:0016772//transferase activity, transferring phosphorus-containing groups	GO:0000904//cell morphogenesis involved in differentiation;GO:0006073//cellular glucan metabolic process;GO:0009826//unidimensional cell growth;GO:0042546//cell wall biogenesis;GO:0043479//pigment accumulation in tissues in response to UV light;GO:0045489//pectin biosynthetic process;GO:0048229//gametophyte development;GO:0048588//developmental cell growth;GO:0065008//regulation of biological qua…
MSTRG.75298	--	1.3	2.67	2.45	7.08	8.74	2.7	0.21	0	0.09	0.1	6.1733	2.14	-1.528438896	0.073283957	0.530805661	-4.419538892	2.79E-06	0.000341256	transmembrane protein [Arabidopsis thaliana]	-	-	-	-
MSTRG.75404	BGAL3	5.38	10.44	10.64	4.26	9.84	4.5	2.81	0.81	2.31	1.9767	6.2	8.82	0.50851044	0.054824043	0.461885553	-2.157709052	0.000586075	0.018373202	PREDICTED: beta-galactosidase 3-like [Brassica oleracea var. oleracea] [Brassica oleracea]	-	-	-	-
MSTRG.7547	--	0.61	0.22	0.11	18.43	5.45	3.47	0.05	0.03	0.39	0.1567	9.1167	0.3133	-4.862736266	2.34E-07	7.27E-05	-1	0.611037736	0.913487456	BnaC07g15840D [Brassica napus]	-	-	-	-
MSTRG.7552	--	0.15	0.08	0.07	3.59	0.43	0.33	0	0	0.15	0.05	1.45	0.1	-3.857980995	0.001049244	0.04223901	-1	0.630776217	0.913487456	BnaC07g15840D [Brassica napus]	-	-	-	-
MSTRG.7553	--	0.03	0	0.03	2.06	0.47	0.36	0.12	0	0.3	0.14	0.9633	0.02	-5.589963182	0.000424457	0.022612834	2.807354922	0.17511883	0.557944582	Ribonuclease H-like superfamily [Arabidopsis suecica]	-	-	-	-
MSTRG.75626	AtMg00810	0.08	0.1	0.33	4.48	0.74	1.27	0	0.03	0.2	0.0767	2.1633	0.17	-3.669649326	0.000484789	0.024840315	-1.148863386	0.406996189	0.808505595	GAG-pre-integrase domain, partial [Arabidopsis suecica]	-	-	-	-
MSTRG.75635	--	1.53	0.51	0.31	2.7	0.38	1	0	0.04	0	0.0133	1.36	0.7833	-0.795908395	0.752812445	0.984859178	-5.876516947	1.55E-05	0.001277487	BnaC07g15840D [Brassica napus]	-	-	-	-
MSTRG.75642	--	0.17	0.05	0.08	2.2	0.6	0.66	0.05	0.08	0.08	0.07	1.1533	0.1	-3.527737632	0.000387345	0.021286692	-0.514573173	0.737676946	0.931552167	01P13-2 [Brassica rapa subsp. pekinensis] [Brassica rapa]	-	-	-	-
MSTRG.75650	RE2	0.13	0.24	0.21	3.72	0.89	1.37	0	0.16	0.34	0.1667	1.9933	0.1933	-3.366020679	8.37E-06	0.001191661	-0.214124805	0.884784294	0.957788453	01P13-1 [Brassica rapa subsp. pekinensis] [Brassica rapa]	-	-	-	-
MSTRG.75683	--	0.09	0.04	0	0.46	2.07	1.2	0.58	1.42	0.08	0.6933	1.2433	0.0433	-4.842592102	0.00037844	0.020893926	4	0.00653001	0.092241293	Retrotransposon gag domain [Arabidopsis suecica]	-	-	-	-
MSTRG.76073	--	1.32	0.49	0.23	0.24	0.09	0.53	2.02	3.67	4.77	3.4867	0.2867	0.68	1.246160587	0.145568617	0.705918232	2.358241794	0.000330091	0.012350136	Zinc finger CCHC-type [Arabidopsis suecica]	-	-	-	-
MSTRG.76074	--	2.17	0.58	0.31	0.67	0.08	0.84	3.83	4.97	6.07	4.9567	0.53	1.02	0.944504887	0.256764274	0.858143691	2.280801089	0.001001226	0.026500129	Transposon En/Spm-like [Arabidopsis thaliana x Arabidopsis arenosa]	-	-	-	-
MSTRG.76409	OEP162	3.81	2.52	1.73	2.83	2.37	7.3	3.94	6.7	8.49	6.3767	4.1667	2.6867	-0.633076351	0.620350009	0.984859178	1.24698513	0.002214394	0.045922243	BnaC03g42500D [Brassica napus]	-	-	-	-
MSTRG.76570	HSP90-7	0.76	0.67	0.62	3.14	4.15	0.93	0.2	0.08	0.1	0.1267	2.74	0.6833	-2.003514484	0.007121538	0.147725593	-2.431552586	0.000108155	0.005397128	PREDICTED: endoplasmin homolog [Brassica oleracea var. oleracea] [Brassica oleracea]	ko04626//Plant-pathogen interaction;ko04141//Protein processing in endoplasmic reticulum	GO:0005576//extracellular region;GO:0005911//cell-cell junction;GO:0009536//plastid;GO:0031090//organelle membrane;GO:0044432//endoplasmic reticulum part	GO:0005515//protein binding;GO:0032550//purine ribonucleoside binding	GO:0000302//response to reactive oxygen species;GO:0006006//glucose metabolic process;GO:0006090//pyruvate metabolic process;GO:0006498//N-terminal protein lipidation;GO:0006970//response to osmotic stress;GO:0006996//organelle organization;GO:0009642//response to light intensity;GO:0009933//meristem structural organization;GO:0010038//response to metal ion;GO:0015031//protein transport;GO:003355…
MSTRG.76968	--	4.72	18.38	17.86	18.75	19.88	10.92	0.66	0.1	2.75	1.17	16.5167	13.6533	-0.274669342	0.615533204	0.984859178	-3.54467278	0.000555224	0.017781971	Harbinger transposase-derived protein [Arabidopsis suecica]	-	-	-	-
MSTRG.76978	CAP10B	2.12	1.79	2.34	0.7	7.26	2.35	0.27	0.28	0	0.1833	3.4367	2.0833	-0.722116238	0.750649278	0.984859178	-3.506352666	4.79E-05	0.002946368	chlorophyll a-b binding protein CP24 10A, chloroplastic [Olea europaea var. sylvestris] [Olea europaea]	ko01100//Metabolic pathways;ko00196//Photosynthesis - antenna proteins	GO:0009523//photosystem II;GO:0009526//plastid envelope;GO:0031224//intrinsic component of membrane;GO:0031976//plastid thylakoid;GO:0044434//chloroplast part	GO:0043169//cation binding;GO:0046906//tetrapyrrole binding	GO:0000097//sulfur amino acid biosynthetic process;GO:0006091//generation of precursor metabolites and energy;GO:0006970//response to osmotic stress;GO:0006996//organelle organization;GO:0031399//regulation of protein modification process;GO:0070838//divalent metal ion transport;GO:1990066//energy quenching
MSTRG.7724	CPP1	0.06	2.04	3.02	0.05	0	0	0	0	2.07	0.69	0.0167	1.7067	6.678071905	0.000127814	0.00969663	-1.306513043	0.524554034	0.879161339	BnaA07g08270D [Brassica napus]	-	GO:0009526//plastid envelope;GO:0042651//thylakoid membrane	GO:0005515//protein binding	GO:0006457//protein folding;GO:0009416//response to light stimulus;GO:0009657//plastid organization;GO:0016265//death
MSTRG.77438	BSMT1	1.97	0.09	0.22	0	0.02	4.1	15.74	16.81	8.46	13.67	1.3733	0.76	-0.853610513	1	1	4.168870014	6.25E-06	0.000630868	S-adenosyl-L-methionine-dependent methyltransferase [Arabidopsis thaliana x Arabidopsis arenosa]	-	-	GO:0008168//methyltransferase activity	GO:0006631//fatty acid metabolic process;GO:0006721//terpenoid metabolic process;GO:0010087//phloem or xylem histogenesis;GO:0044260//cellular macromolecule metabolic process
MSTRG.77539	XTH25	1.91	0.78	0.39	0.63	0	2.07	5.55	5.43	6.43	5.8033	0.9	1.0267	0.189970944	0.790890006	0.984859178	2.498913947	7.28E-06	0.000705168	PREDICTED: probable xyloglucan endotransglucosylase/hydrolase protein 25 [Brassica oleracea var. oleracea] [Brassica oleracea]	-	GO:0005576//extracellular region;GO:0009536//plastid;GO:0030312//external encapsulating structure	GO:0016758//transferase activity, transferring hexosyl groups;GO:0016787//hydrolase activity	GO:0006950//response to stress;GO:0009605//response to external stimulus;GO:0009725//response to hormone;GO:0010243//response to organonitrogen compound;GO:0044042//glucan metabolic process;GO:0071555//cell wall organization
MSTRG.77918	PUB3	1.02	1.9	1.8	1.74	2.59	0.97	0.43	0.14	0.29	0.2867	1.7667	1.5733	-0.1672055	0.43503777	0.976251205	-2.456378295	0.000146539	0.006777485	PREDICTED: U-box domain-containing protein 3-like isoform X1 [Brassica oleracea var. oleracea] [Brassica oleracea]	-	-	GO:0003824//catalytic activity	GO:0032446//protein modification by small protein conjugation
MSTRG.7820	FIGL1	0.13	0.49	0.63	0.35	1.2	2.02	0	0	0	0	1.19	0.4167	-1.513995979	0.256848368	0.858378531	-8.702749879	0.00187519	0.040837651	ATPase family AAA domain-containing protein FIGL1-like [Brassica napus]	-	-	GO:0032550//purine ribonucleoside binding;GO:0042623//ATPase activity, coupled	-
MSTRG.78509	At5g03970	0	1.35	1.25	0.03	0	0	0	0.03	0.58	0.2033	0.01	0.8667	6.437405312	0.000848478	0.036579953	-2.091630475	0.287210582	0.701345314	F-box protein At5g03970 isoform X1 [Brassica rapa]	-	-	-	-
MSTRG.78674	--	0.49	0.32	0.12	17.33	1.52	1.32	0.08	0.12	0.66	0.2867	6.7233	0.31	-4.438836558	0.000291475	0.01770056	-0.112894056	0.999849769	0.999903601	GAG-pre-integrase domain, partial [Arabidopsis suecica]	-	-	-	-
MSTRG.78684	PUB7	3.32	8.62	9.05	9.48	15.36	4.31	1.5	0.2	1.05	0.9167	9.7167	6.9967	-0.473793717	0.844453224	0.984859178	-2.932198643	0.000298204	0.011472171	U-box domain-containing protein 7 [Brassica rapa]	-	-	-	-
MSTRG.78775	--	0	4.06	4.41	0	0	0.04	0	0	3.89	1.2967	0.0133	2.8233	7.726218159	6.27E-05	0.005718269	-1.122591814	0.76034428	0.931552167	hypothetical protein DY000_02057101 [Brassica cretica]	-	-	-	-
MSTRG.78831	FAD7	0	3.48	2.79	0	0	0.05	0.05	0	5.26	1.77	0.0167	2.09	6.970393538	0.000208573	0.013912138	-0.239753582	0.927274955	0.977750692	sn-2 acyl-lipid omega-3 desaturase (ferredoxin), chloroplastic [Arabidopsis lyrata subsp. lyrata] [Arabidopsis lyrata]	-	GO:0009526//plastid envelope;GO:0016020//membrane	GO:0016705//oxidoreductase activity, acting on paired donors, with incorporation or reduction of molecular oxygen	GO:0006631//fatty acid metabolic process;GO:0009628//response to abiotic stimulus
MSTRG.78958	DTX46	1.67	3.79	4.58	0.4	0.84	0.58	1.68	2.22	4.99	2.9633	0.6067	3.3467	2.463748914	1.86E-06	0.000361208	-0.175503945	0.799026995	0.931552167	PREDICTED: LOW QUALITY PROTEIN: MATE efflux family protein 4, chloroplastic [Brassica oleracea var. oleracea] [Brassica oleracea]	-	GO:0031224//intrinsic component of membrane	GO:0015291//secondary active transmembrane transporter activity	GO:0044763//single-organism cellular process
MSTRG.79188	--	1.69	1.29	1.59	2.84	0.99	0.62	0.21	0.24	0.44	0.2967	1.4833	1.5233	0.038388829	0.228146022	0.83165744	-2.360316924	8.21E-06	0.00077703	nuclear protein [Arabidopsis thaliana]	-	GO:0005576//extracellular region;GO:0009526//plastid envelope;GO:0009532//plastid stroma	GO:0016614//oxidoreductase activity, acting on CH-OH group of donors;GO:0048037//cofactor binding	GO:0006739//NADP metabolic process;GO:0009668//plastid membrane organization;GO:0009887//organ morphogenesis;GO:0016109//tetraterpenoid biosynthetic process;GO:0048869//cellular developmental process
MSTRG.79776	--	3.13	4.74	3.21	6.07	7.95	8.31	0.5	0.06	0.65	0.4033	7.4433	3.6933	-1.01102537	0.234616506	0.837004991	-3.194878929	4.69E-05	0.002902062	BnaA05g20280D [Brassica napus]	-	-	-	-
MSTRG.79915	NET3A	12.51	5.77	6.54	1.73	0.47	9.09	31.24	61.69	21.81	38.2467	3.7633	8.2733	1.136457629	1	1	2.208793403	3.68E-06	0.000422685	PREDICTED: protein NETWORKED 3A-like [Brassica oleracea var. oleracea] [Brassica oleracea]	-	-	-	GO:0006796//phosphate-containing compound metabolic process
MSTRG.80004	--	4.55	2.28	3.05	0.11	0	2.35	9.38	9.25	18.55	12.3933	0.82	3.2933	2.005852726	0.163189575	0.738282837	1.911943823	9.20E-06	0.000847324	hypothetical protein F2Q69_00009836 [Brassica cretica]	-	-	-	-
MSTRG.80148	--	0.27	0.84	0.63	0	0.04	0.79	2.88	3.61	2.55	3.0133	0.2767	0.58	1.067904065	0.447201219	0.979771144	2.377235467	2.88E-05	0.002016026	hypothetical protein F2Q69_00003190 [Brassica cretica]	-	-	-	-
MSTRG.80153	--	12.11	6.7	3.6	2.03	3.5	10.92	20.04	30.82	33.69	28.1833	5.4833	7.47	0.446055065	0.452229043	0.979771144	1.915662106	5.16E-05	0.00310892	BnaA04g12410D [Brassica napus]	-	-	-	-
MSTRG.80265	EMB2271	0	6.17	6.93	0.09	0	0.04	0	0.05	5.77	1.94	0.0433	4.3667	6.654911378	5.54E-05	0.00524154	-1.170475754	0.70185486	0.931552167	PREDICTED: LOW QUALITY PROTEIN: mediator of DNA damage checkpoint protein 1 [Brassica oleracea var. oleracea] [Brassica oleracea]	-	GO:0030529//intracellular ribonucleoprotein complex;GO:0043232//intracellular non-membrane-bounded organelle	GO:0016407//acetyltransferase activity;GO:0097159//organic cyclic compound binding	GO:0003006//developmental process involved in reproduction;GO:0006221//pyrimidine nucleotide biosynthetic process;GO:0006405//RNA export from nucleus;GO:0006886//intracellular protein transport;GO:0009451//RNA modification;GO:0048229//gametophyte development;GO:0048544//recognition of pollen;GO:0071840//cellular component organization or biogenesis
MSTRG.80343	PRA1B4	7.24	3.81	4.56	6.39	5.4	8.24	10.24	15.33	10.45	12.0067	6.6767	5.2033	-0.359691884	0.929505933	0.987387819	1.206327644	0.000164888	0.007449859	PREDICTED: PRA1 family protein B4 [Raphanus sativus]	-	GO:0009536//plastid;GO:0031090//organelle membrane;GO:0031224//intrinsic component of membrane;GO:0031984//organelle subcompartment	GO:0005488//binding	GO:0006810//transport
MSTRG.80458	--	1.6	5.28	5.51	114.35	9.89	3.13	0.38	0.07	0.54	0.33	42.4567	4.13	-3.361777421	0.018709984	0.261499671	-3.645603852	8.13E-05	0.004326479	pollen coat protein B30 [Brassica oleracea]	-	-	-	-
MSTRG.80500	--	0	1.24	1.07	0	0	0	0	0	6.97	2.3233	0	0.77	9.588714636	0.000395283	0.021562627	1.593265804	1	1	BnaC05g24090D [Brassica napus]	-	-	-	-
MSTRG.80506	WRKY18	0.07	0.82	0.66	0.02	0.02	0.07	0	0	0.61	0.2033	0.0367	0.5167	3.816692787	0.000765468	0.03444406	-1.345387068	0.480176936	0.852226486	PREDICTED: WRKY transcription factor 18-like [Raphanus sativus]	-	-	GO:0005515//protein binding	GO:0009617//response to bacterium;GO:0010033//response to organic substance;GO:0031347//regulation of defense response;GO:0098542//defense response to other organism
MSTRG.80528	CYTC-2	2.9	1.01	0.59	2.02	0.71	2.96	4.97	7.66	6.28	6.3033	1.8967	1.5	-0.338503651	0.984554934	0.995679396	2.071152457	0.000294994	0.011404721	PREDICTED: LOW QUALITY PROTEIN: cytochrome c-2-like [Brassica oleracea var. oleracea] [Brassica oleracea]	-	GO:0031090//organelle membrane;GO:0031970//organelle envelope lumen;GO:0043231//intracellular membrane-bounded organelle;GO:0044425//membrane part;GO:0044444//cytoplasmic part	GO:0046906//tetrapyrrole binding;GO:0046914//transition metal ion binding	GO:0006006//glucose metabolic process
MSTRG.80537	--	0.08	7.01	4.09	0.48	0.21	0	0.07	0	2.55	0.8733	0.23	3.7267	4.018180016	0.001222315	0.046795348	-2.093281471	0.246972252	0.655224422	unnamed protein product, partial [Brassica oleracea]	-	-	-	-
MSTRG.80630	CLPX2	0.06	1.06	1.46	0.03	0.02	0	0	0	1.59	0.53	0.0167	0.86	5.689299161	7.71E-05	0.00670163	-0.6983443	0.695474465	0.930094662	CLP protease regulatory subunit CLPX2, mitochondrial-like isoform X2 [Brassica napus]	-	-	GO:0005515//protein binding;GO:0016462//pyrophosphatase activity;GO:0032550//purine ribonucleoside binding	GO:0044267//cellular protein metabolic process
MSTRG.80737	ANL2	0.16	8.09	10.07	0.11	0.2	0.21	0.15	0.22	10.07	3.48	0.1733	6.1067	5.13876407	1.88E-06	0.000364472	-0.811297792	0.598945828	0.913487456	PREDICTED: homeobox-leucine zipper protein ANTHOCYANINLESS 2 [Brassica oleracea var. oleracea] [Brassica oleracea]	-	GO:0043231//intracellular membrane-bounded organelle	GO:0001071//nucleic acid binding transcription factor activity;GO:0003677//DNA binding	GO:0010053//root epidermal cell differentiation;GO:0010468//regulation of gene expression;GO:0034645//cellular macromolecule biosynthetic process;GO:0043479//pigment accumulation in tissues in response to UV light;GO:0043543//protein acylation
MSTRG.80750	SRS7	0	1.41	1.5	0	0	0	0	0	4.91	1.6367	0	0.97	9.921840937	0.000500626	0.025432099	0.754703871	1	1	protein SHI RELATED SEQUENCE 7 [Brassica rapa]	-	GO:0043231//intracellular membrane-bounded organelle	-	GO:0006351//transcription, DNA-templated;GO:0044699//single-organism process;GO:0065007//biological regulation
MSTRG.80821	RS31	0.1	1.62	1.26	0.09	0.09	0.13	0	0.1	0.99	0.3633	0.1033	0.9933	3.26497221	0.001253622	0.047496905	-1.450984196	0.369114495	0.780602082	BnaC03g41110D [Brassica napus]	ko03040//Spliceosome	GO:0030529//intracellular ribonucleoprotein complex	GO:0003676//nucleic acid binding	GO:0000377//RNA splicing, via transesterification reactions with bulged adenosine as nucleophile
MSTRG.80832	--	4	15.88	15.08	4.41	3.79	1.96	4.5	4.45	15.46	8.1367	3.3867	11.6533	1.782804783	8.56E-05	0.007265416	-0.51823289	0.494132623	0.857032282	BnaA09g52750D [Brassica napus]	-	-	-	GO:0006787//porphyrin-containing compound catabolic process
MSTRG.80949	--	1.84	12.19	11.31	0	0.31	0.11	0.41	0.28	0.69	0.46	0.14	8.4467	5.914883386	4.11E-08	1.89E-05	-4.198676352	4.37E-06	0.000483744	BnaUnng04780D [Brassica napus]	-	-	-	-
MSTRG.81045	--	0.02	0.91	0.86	0.02	0.02	0.02	0	0	0.66	0.22	0.02	0.5967	4.898853277	1.30E-05	0.001722552	-1.439421658	1	1	MuDR family transposase [Arabidopsis thaliana]	-	-	-	-
MSTRG.81231	MAP1A	2.16	3.36	3.39	6.42	8.21	1.21	0.5	0.51	0.61	0.54	5.28	2.97	-0.830074999	0.735402743	0.984859178	-2.459431619	1.66E-06	0.000223827	Peptidase M24A methionine aminopeptidase subfamily 1 [Arabidopsis suecica]	-	GO:0044444//cytoplasmic part	GO:0008233//peptidase activity	GO:0006464//cellular protein modification process;GO:0006508//proteolysis;GO:0009409//response to cold;GO:0043479//pigment accumulation in tissues in response to UV light;GO:0048437//floral organ development
MSTRG.81324	MDH1	40.82	64.76	59.41	99.69	94.53	32.75	22.91	15.95	27.95	22.27	75.6567	54.9967	-0.460123035	0.734701555	0.984859178	-1.304242622	0.001691007	0.037964411	PREDICTED: malate dehydrogenase, cytoplasmic 1 [Brassica oleracea var. oleracea] [Brassica oleracea]	ko01100//Metabolic pathways;ko01110//Biosynthesis of secondary metabolites;ko01200//Carbon metabolism;ko00270//Cysteine and methionine metabolism;ko00620//Pyruvate metabolism;ko00630//Glyoxylate and dicarboxylate metabolism;ko00710//Carbon fixation in photosynthetic organisms;ko00020//Citrate cycle (TCA cycle)	GO:0044424//intracellular part	GO:0016615//malate dehydrogenase activity	GO:0005975//carbohydrate metabolic process;GO:0006101//citrate metabolic process;GO:0043648//dicarboxylic acid metabolic process
MSTRG.81373	--	0.73	0.13	0.08	9.58	15.83	2.53	0.05	0	0	0.0167	9.3133	0.3133	-4.893527454	9.42E-07	0.000214782	-4.232660757	0.028216466	0.216666232	Harbinger transposase-derived protein [Arabidopsis suecica]	-	-	-	-
MSTRG.81390	--	0.5	0.69	0.92	12.85	2.55	1.43	0.06	0.02	0	0.0267	5.61	0.7033	-2.995720273	0.000362567	0.020472171	-4.721099189	0.000276518	0.010825004	hypothetical protein IGI04_042909, partial [Brassica rapa subsp. trilocularis] [Brassica rapa]	-	-	-	-
MSTRG.81520	RE2	0.05	0.02	0.07	2.63	0.6	0.46	0	0.05	0.02	0.0233	1.23	0.0467	-4.720122084	7.75E-05	0.006727201	-1	0.58881838	0.907570678	01P13-1 [Brassica rapa subsp. pekinensis] [Brassica rapa]	-	-	-	-
MSTRG.81529	--	0.56	0.32	0.27	13.43	2.19	1.51	0	0.02	0.15	0.0567	5.71	0.3833	-3.896819385	0.000188719	0.012891251	-2.75802721	0.0146779	0.149758883	BnaC07g15840D [Brassica napus]	-	-	-	-
MSTRG.81553	--	164.62	165.18	147.84	6.07	0.68	123.62	665.82	430.5	818.68	638.3333	43.4567	159.2133	1.873311737	0.144494097	0.70421917	2.003348827	4.03E-09	1.68E-06	acanthoscurrin-2-like [Brassica napus]	-	-	-	-
MSTRG.81554	NUDT8	1.66	1.31	1.44	0.11	0.06	1.23	3.45	2.45	4.66	3.52	0.4667	1.47	1.655351829	0.117012481	0.650542268	1.259759274	0.000742867	0.021833025	acanthoscurrin-2-like [Brassica napus]	-	-	-	GO:0006950//response to stress
MSTRG.8224	--	1.07	3.26	2.94	17.72	11.87	3.26	0.18	0	0.03	0.07	10.95	2.4233	-2.175866101	0.02120292	0.280751804	-5.113494131	1.90E-06	0.000252041	Neprosin activation peptide [Arabidopsis suecica]	-	-	-	-
MSTRG.82400	RE2	0.12	0.39	0.51	6.69	2.41	2.18	0.04	0.23	0.31	0.1933	3.76	0.34	-3.46712601	5.79E-05	0.005392812	-0.814444347	0.45554737	0.84142899	uncharacterized mitochondrial protein AtMg00810-like [Brassica rapa]	-	-	-	-
MSTRG.82519	AHA3	3.2	6.2	4.52	11.46	7.19	2.89	1.01	2.59	1.01	1.5367	7.18	4.64	-0.629859039	0.99912237	0.999749338	-1.594320555	0.002405679	0.048366786	ATPase 3, plasma membrane-type [Brassica rapa]	ko00190//Oxidative phosphorylation	GO:0005911//cell-cell junction;GO:0031090//organelle membrane;GO:0031224//intrinsic component of membrane;GO:0043231//intracellular membrane-bounded organelle;GO:0044444//cytoplasmic part	GO:0008324//cation transmembrane transporter activity;GO:0015662//ATPase activity, coupled to transmembrane movement of ions, phosphorylative mechanism;GO:0032550//purine ribonucleoside binding;GO:0046872//metal ion binding	GO:0001101//response to acid chemical;GO:0006464//cellular protein modification process;GO:0006865//amino acid transport;GO:0006950//response to stress;GO:0009152//purine ribonucleotide biosynthetic process;GO:0009664//plant-type cell wall organization;GO:0010383//cell wall polysaccharide metabolic process;GO:0015698//inorganic anion transport;GO:0015833//peptide transport;GO:0015988//energy coup…
MSTRG.82930	DSC2	0	0.77	0.72	0.04	0.02	0	0	0.03	1.06	0.3633	0.02	0.4967	4.63420602	0.001218934	0.046709486	-0.450984196	1	1	PREDICTED: LOW QUALITY PROTEIN: disease resistance protein TAO1-like [Brassica oleracea var. oleracea] [Brassica oleracea]	-	-	-	GO:0050896//response to stimulus
MSTRG.82996	--	0.19	1.08	1.41	0.26	1.81	0.05	0	0	0	0	0.7067	0.8933	0.338168736	0.459990392	0.979927365	-9.803054785	0.000131431	0.006230693	unnamed protein product [Brassica napus]	-	-	-	-
MSTRG.8318	At1g58602	0.02	0.17	0.14	0	0.01	0	0.01	0	0.91	0.3067	0.0033	0.11	5.044394119	0.00107803	0.042996995	1.479167837	1	1	probable disease resistance protein At1g59620 [Brassica rapa]	-	GO:0016020//membrane;GO:0044464//cell part	-	GO:0006950//response to stress;GO:0009620//response to fungus;GO:0010033//response to organic substance
MSTRG.83615	--	1.86	3.51	3.61	1.09	1.6	0.73	2.41	0.7	1.72	1.61	1.14	2.9933	1.39271912	0.000666534	0.031159212	-0.894692256	0.225583468	0.628060879	hypothetical protein DY000_02059266 [Brassica cretica]	-	-	-	-
MSTRG.83711	--	0	2.48	1.73	0.02	0.04	0	0.02	0.07	1.98	0.69	0.02	1.4033	6.132713922	0.00019505	0.01321429	-1.024189466	0.568795981	0.893208891	BnaCnng40340D [Brassica napus]	-	-	-	-
MSTRG.83925	At5g05130	0.08	0.83	0.61	13.46	0.47	0.34	0	0	0	0	4.7567	0.5067	-3.230842106	1	1	-8.984893108	0.001357602	0.032722857	helicase-like transcription factor-like protein [Arabidopsis thaliana]	-	GO:0043231//intracellular membrane-bounded organelle	GO:0003676//nucleic acid binding;GO:0017111//nucleoside-triphosphatase activity;GO:0032550//purine ribonucleoside binding;GO:0046914//transition metal ion binding	GO:0000280//nuclear division;GO:0006342//chromatin silencing;GO:0007059//chromosome segregation;GO:0033043//regulation of organelle organization;GO:0051276//chromosome organization
MSTRG.84010	FATA	0.08	2.17	2.88	0.17	0.03	0.07	0	0	0.07	0.0233	0.09	1.71	4.247927513	0.000152167	0.010999307	-6.195460094	0.000319506	0.01208202	oleoyl-acyl carrier protein thioesterase 1, chloroplastic isoform X2 [Brassica rapa]	ko00061//Fatty acid biosynthesis	GO:0009536//plastid	GO:0016297//acyl-[acyl-carrier-protein] hydrolase activity	GO:0006631//fatty acid metabolic process
MSTRG.84177	--	0.38	3.29	3.76	0.62	0.17	0.1	0.05	0	0.32	0.1233	0.2967	2.4767	3.06148497	1.78E-05	0.00217911	-4.327765035	3.80E-05	0.002470661	Ribonuclease H-like superfamily [Arabidopsis suecica]	-	-	-	-
MSTRG.84178	--	1.36	3.61	4.12	4.79	0.53	0.33	0.12	0.11	0.43	0.22	1.8833	3.03	0.686029427	0.232605152	0.835827984	-3.783742365	3.32E-07	6.28E-05	Transposon En/Spm-like [Arabidopsis suecica]	-	-	-	-
MSTRG.84193	GIP	0.16	0.17	0.33	5.5	1.32	1.51	0.07	0.04	0.51	0.2067	2.7767	0.22	-3.657778566	9.59E-06	0.001326136	-0.090197809	0.965784336	0.996044471	Integrase catalytic core [Arabidopsis thaliana x Arabidopsis arenosa]	-	-	-	-
MSTRG.84330	--	0	0	0	1.02	0.28	0.47	0.17	0	0	0.0567	0.59	0	-9.204571144	0.000964198	0.039751594	5.824428435	0.446736535	0.835012252	unnamed protein product, partial [Brassica napus]	-	-	-	-
MSTRG.84458	--	0.06	4.1	4.72	0.03	0.02	0.09	0.02	0.07	3.78	1.29	0.0467	2.96	5.987060944	1.98E-06	0.000380495	-1.19822611	0.471552993	0.850011187	Reverse transcriptase domain [Arabidopsis suecica]	-	-	-	-
MSTRG.84624	--	0.55	0.04	0.09	0.08	5.61	2.69	3.73	7.97	1.59	4.43	2.7933	0.2267	-3.623343592	0.019157389	0.265576162	4.288662548	8.09E-06	0.000768533	BnaCnng18250D [Brassica napus]	-	-	-	-
MSTRG.84716	SF3B4	0.39	8.41	9.11	1.08	0.08	0.09	0.11	0.04	7.83	2.66	0.4167	5.97	3.840765337	0.000127389	0.009686134	-1.166304686	1	1	PREDICTED: translation initiation factor IF-2-like [Brassica oleracea var. oleracea] [Brassica oleracea]	ko03040//Spliceosome	GO:0043231//intracellular membrane-bounded organelle;GO:0043232//intracellular non-membrane-bounded organelle	GO:0003676//nucleic acid binding	-
MSTRG.84866	F-ATMBP	969.93	421.81	416.25	249.23	203.04	706	1356.82	1982.08	1402.93	1580.61	386.09	602.6633	0.642415104	0.201577681	0.79816784	1.391057243	0.00018656	0.008144017	jacalin-related lectin 34 isoform X2 [Brassica rapa]	-	GO:0043231//intracellular membrane-bounded organelle;GO:0044444//cytoplasmic part	-	GO:0006950//response to stress
MSTRG.84867	JAL5	281.9	129.79	124.83	70.39	55.58	246.13	377.24	573.67	402.22	451.0433	124.0333	178.84	0.527941561	0.317136352	0.911086832	1.334596594	0.000227928	0.009486454	myrosinase-binding protein [Brassica napus]	-	GO:0005911//cell-cell junction;GO:0043231//intracellular membrane-bounded organelle;GO:0044444//cytoplasmic part	GO:0046914//transition metal ion binding	GO:0001101//response to acid chemical;GO:0006950//response to stress;GO:0007165//signal transduction;GO:0009628//response to abiotic stimulus;GO:0009725//response to hormone;GO:0044237//cellular metabolic process;GO:0050790//regulation of catalytic activity;GO:0071704//organic substance metabolic process
MSTRG.84897	--	1.16	0.18	0.17	0.17	0	1.63	1.25	2.21	11.57	5.01	0.6	0.5033	-0.253448357	0.925802591	0.986193303	3.315224555	0.001073343	0.027770106	hypothetical protein DY000_02033844 [Brassica cretica]	-	-	-	-
MSTRG.84898	--	0.16	0.16	0.04	0.02	0	0.05	0.58	0.97	5.75	2.4333	0.0233	0.12	2.362570079	0.082258912	0.557610236	4.341827652	1.49E-05	0.001235219	Zinc finger CCHC-type [Arabidopsis suecica]	-	-	-	-
MSTRG.84932	--	0.11	0.19	0	9.94	1.65	0.71	0	0	0	0	4.1	0.1	-5.357552005	0.001016582	0.04128881	-6.64385619	0.555470963	0.884950531	Plant thionin family protein [Arabidopsis thaliana]	-	-	-	-
MSTRG.85082	AMC5	2.52	0.83	0.99	14.5	6.05	6.72	1.47	1	1.36	1.2767	9.09	1.4467	-2.651547752	6.17E-05	0.005652631	-0.180350651	0.885021929	0.957944765	PREDICTED: metacaspase-5 [Brassica oleracea var. oleracea] [Brassica oleracea]	-	GO:0005911//cell-cell junction;GO:0009536//plastid;GO:0016020//membrane	GO:0004175//endopeptidase activity;GO:0005515//protein binding	GO:0001101//response to acid chemical;GO:0006970//response to osmotic stress;GO:0006996//organelle organization;GO:0009699//phenylpropanoid biosynthetic process;GO:0010038//response to metal ion;GO:0012501//programmed cell death;GO:0015698//inorganic anion transport;GO:0016485//protein processing;GO:0048588//developmental cell growth;GO:0070838//divalent metal ion transport
MSTRG.85308	--	23.66	53.46	39.85	190.86	97.39	39.42	4.66	0.88	2.17	2.57	109.2233	38.99	-1.486105032	0.129042892	0.676570698	-3.92326389	3.50E-08	1.00E-05	PREDICTED: defensin-like protein 276 [Camelina sativa]	-	-	-	-
MSTRG.85390	At3g27390	0	0	0	1.11	1.16	0.59	0	0	0	0	0.9533	0	-9.896836931	2.24E-05	0.002600618	0	1	1	uncharacterized membrane protein At3g27390-like [Brassica napus]	-	GO:0009536//plastid	-	-
MSTRG.85519	--	0.94	0.64	0.59	1.6	1.31	1.49	1.71	3.07	1.95	2.2433	1.4667	0.7233	-1.019808481	0.263273065	0.865896929	1.632911462	0.000387263	0.013737968	diacylglycerol O-acyltransferase 3, cytosolic [Eutrema salsugineum]	-	-	-	-
MSTRG.85993	--	1.49	1.98	2.02	71.84	13.81	4.64	0	0	0	0	30.0967	1.83	-4.039688158	0.000120895	0.009339514	-10.83762793	6.86E-05	0.003821408	Defensin-like (DEFL) family protein [Arabidopsis thaliana]	-	-	-	-
MSTRG.86253	HMGA	4.15	2.77	3.34	1.01	1.51	10.93	18.5	30.66	8.26	19.14	4.4833	3.42	-0.390575442	0.947152289	0.990480776	2.4845226	4.86E-06	0.000519269	BnaC02g34030D [Brassica napus]	-	GO:0000785//chromatin;GO:0043231//intracellular membrane-bounded organelle	GO:0003676//nucleic acid binding	GO:0010468//regulation of gene expression;GO:0034728//nucleosome organization;GO:0048869//cellular developmental process
MSTRG.86863	CYP709B1	0.22	6.76	8.09	1.2	0.69	0.31	0.32	0.22	0.1	0.2133	0.7333	5.0233	2.776103988	0.001600048	0.056051541	-4.557463702	0.000119095	0.005816108	PREDICTED: LOW QUALITY PROTEIN: cytochrome P450 709B1-like [Raphanus sativus]	-	-	GO:0016491//oxidoreductase activity;GO:0046872//metal ion binding	-
MSTRG.86884	HDG11	0.04	2.54	3.09	0	0	0	0.04	0	5.97	2.0033	0	1.89	10.88417052	7.18E-06	0.001062565	0.084016256	0.96288676	0.994996636	BnaCnng75280D [Brassica napus]	-	GO:0043231//intracellular membrane-bounded organelle	GO:0001071//nucleic acid binding transcription factor activity;GO:0044212//transcription regulatory region DNA binding	GO:0000904//cell morphogenesis involved in differentiation;GO:0009827//plant-type cell wall modification;GO:0010468//regulation of gene expression
MSTRG.86909	--	1.6	5.28	5.51	114.35	9.89	3.13	0.38	0.07	0.54	0.33	42.4567	4.13	-3.361777421	0.018709984	0.261499671	-3.645603852	8.13E-05	0.004326479	pollen coat protein B30 [Brassica oleracea]	-	-	-	-
MSTRG.86951	--	2.2	0.27	0.16	0.12	0.14	1.28	5.27	9.04	8	7.4367	0.5133	0.8767	0.772132449	0.361080466	0.942243152	3.084555809	0.000272085	0.010710778	Transposon En/Spm-like [Arabidopsis suecica]	-	-	-	-
MSTRG.87065	--	0.12	0.27	0.17	4.15	1.63	0.55	0.03	0.06	0.59	0.2267	2.11	0.1867	-3.498706767	0.000284606	0.017388516	0.280107919	0.856523197	0.944515332	01P13-2 [Brassica rapa subsp. pekinensis] [Brassica rapa]	-	-	-	-
MSTRG.87186	EPSIN1	0.54	3.43	3.32	0.55	0.55	0.32	0.26	0.41	1.29	0.6533	0.4733	2.43	2.360027885	4.81E-05	0.004706576	-1.89506516	0.030024336	0.224171904	LOW QUALITY PROTEIN: clathrin interactor EPSIN 1 [Brassica rapa]	ko04144//Endocytosis	GO:0012505//endomembrane system;GO:0031984//organelle subcompartment;GO:0043231//intracellular membrane-bounded organelle;GO:0044444//cytoplasmic part	GO:0008194//UDP-glycosyltransferase activity	GO:0015031//protein transport
MSTRG.87601	--	0.14	0.05	0.1	2.63	0.71	0.67	0.07	0.07	0.14	0.0933	1.3367	0.0967	-3.789477431	6.75E-05	0.006058248	-0.050626073	0.867452657	0.949604225	GAG-pre-integrase domain [Arabidopsis suecica]	-	-	-	-
MSTRG.87612	--	0.44	1.77	1.46	1.33	2.62	1.31	0.16	0.03	0.13	0.1067	1.7533	1.2233	-0.519282736	0.994829578	0.998260822	-3.519636253	6.01E-05	0.003493774	BnaC09g54350D [Brassica napus]	-	-	GO:0016740//transferase activity	-
MSTRG.87806	Os01g0518400	0.11	0.1	0.05	0.72	0.14	0.05	0.57	1.25	2.3	1.3733	0.3033	0.0867	-1.807354922	0.413975311	0.967298258	3.986060809	7.33E-05	0.004031231	HAT C-terminal dimerization domain [Arabidopsis suecica]	-	-	-	-
MSTRG.88196	--	0.33	1.14	0.85	1.79	4.08	1.21	0	0	0	0	2.36	0.7733	-1.609624555	0.156075675	0.724232151	-9.594946589	1.39E-05	0.001167269	BnaC02g31260D [Brassica napus]	ko03420//Nucleotide excision repair;ko03440//Homologous recombination;ko03030//DNA replication;ko03430//Mismatch repair	-	-	-
MSTRG.88199	--	1.78	3.07	1.76	22.5	16.07	6.69	0.1	0	0	0.0333	15.0867	2.2033	-2.775514408	1.63E-05	0.002054326	-6.046578367	3.78E-05	0.002463767	BnaA06g16040D [Brassica napus]	-	-	-	-
MSTRG.88220	--	0.34	1.26	0.83	0.03	0.07	0.04	0	0	1.73	0.5767	0.0467	0.81	4.117457582	1.92E-05	0.00231362	-0.490184276	0.806484726	0.931552167	glutamine synthetase cytosolic isozyme-like isoform X2 [Brassica napus]	-	-	-	-
MSTRG.88227	KCS1	0.13	0.84	0.53	0	0.03	0	0	0	1.01	0.3367	0.01	0.5	5.64385619	3.60E-05	0.003779675	-0.570607208	0.795305474	0.931552167	3-ketoacyl-CoA synthase 1 [Eutrema salsugineum]	ko01100//Metabolic pathways;ko01110//Biosynthesis of secondary metabolites;ko04626//Plant-pathogen interaction;ko00062//Fatty acid elongation	GO:0005840//ribosome;GO:0031224//intrinsic component of membrane;GO:0043231//intracellular membrane-bounded organelle	GO:0004312//fatty acid synthase activity	GO:0006631//fatty acid metabolic process;GO:0006950//response to stress;GO:0007275//multicellular organism development;GO:0009699//phenylpropanoid biosynthetic process
MSTRG.88244	CATHB2	1.25	4.09	4.11	0.05	0	0	0	0	8.05	2.6833	0.0167	3.15	7.562242424	5.88E-09	4.20E-06	-0.231325546	1	1	PREDICTED: cathepsin B-like [Brassica oleracea var. oleracea] [Brassica oleracea]	-	GO:0043231//intracellular membrane-bounded organelle;GO:0044444//cytoplasmic part	GO:0070011//peptidase activity, acting on L-amino acid peptides	GO:0003006//developmental process involved in reproduction;GO:0009062//fatty acid catabolic process;GO:0016192//vesicle-mediated transport;GO:0019222//regulation of metabolic process;GO:0019538//protein metabolic process;GO:0032989//cellular component morphogenesis;GO:0040007//growth
MSTRG.88259	--	2.51	11.32	14.42	17.7	11.3	5.59	0.41	0.11	2.09	0.87	11.53	9.4167	-0.292104146	0.616855747	0.984859178	-3.436129156	0.001088728	0.028046818	Harbinger transposase-derived protein [Arabidopsis suecica]	-	-	-	-
MSTRG.88358	CAND8	0.06	0.05	0.28	0	0.27	3.03	2.83	3.8	1.01	2.5467	1.1	0.13	-3.080919995	0.119153073	0.655782623	4.292026609	1.27E-05	0.001083866	PREDICTED: transmembrane protein adipocyte-associated 1 [Brassica oleracea var. oleracea] [Brassica oleracea]	-	-	-	-
MSTRG.88519	At5g23360	2.3	2.83	2.93	3.8	8.27	1.93	0.67	0.39	0.55	0.5367	4.6667	2.6867	-0.796575083	0.665837194	0.984859178	-2.32371915	7.87E-05	0.004244283	BnaC09g18170D [Brassica napus]	-	GO:0009536//plastid	-	-
MSTRG.88748	SFH13	0.11	0.49	0.76	2.52	3.01	0.32	0.02	0	0	0.0067	1.95	0.4533	-2.104829973	0.123468327	0.664147493	-6.087462841	0.000290961	0.011271235	phosphatidylinositol/phosphatidylcholine transfer protein SFH13 isoform X2 [Brassica rapa]	-	-	-	-
MSTRG.88862	GSTT3	0.13	0.61	0.46	1.41	1.3	0.68	0.01	0.01	0.07	0.03	1.13	0.4	-1.498250868	0.162318933	0.736730039	-3.736965594	0.00081238	0.023101711	Harbinger transposase-derived protein [Arabidopsis suecica]	-	-	-	-
MSTRG.89001	TRRAP	0.27	5.25	5.31	0.35	0.27	0.19	0.36	0.34	5.71	2.1367	0.27	3.61	3.740967525	1.99E-06	0.000382391	-0.756636981	1	1	transformation/transcription domain-associated protein-like isoform X2 [Brassica napus]	-	GO:0044444//cytoplasmic part	GO:0016772//transferase activity, transferring phosphorus-containing groups	GO:0006796//phosphate-containing compound metabolic process
MSTRG.8916	LCR81	0.14	0	0	21.26	2.55	0.27	0	0	0	0	8.0267	0.0467	-7.426264755	0.000419829	0.022453734	-5.544320516	0.825445526	0.931552167	low-molecular-weight cysteine-rich 81 [Arabidopsis thaliana]	-	-	-	GO:0006950//response to stress;GO:0051704//multi-organism process
MSTRG.89459	--	0.85	0.82	0.49	0	0	0.24	4.2	3.61	1.77	3.1933	0.08	0.72	3.169925001	0.028268517	0.328817216	2.148994344	0.000247382	0.010032106	BnaUnng04820D [Brassica napus]	ko03420//Nucleotide excision repair;ko03440//Homologous recombination;ko03030//DNA replication;ko03430//Mismatch repair	-	-	-
MSTRG.89525	--	37.53	70.69	62.16	252.57	121.17	53.81	13.75	1.52	11.07	8.78	142.5167	56.7933	-1.327337151	0.190849924	0.782567686	-2.693428745	0.000778993	0.022497921	defensin-like protein 276 [Arabidopsis lyrata subsp. lyrata] [Arabidopsis lyrata]	-	-	-	-
MSTRG.89829	--	0.71	4.21	4.49	2.48	1.83	0.52	0.15	0.19	0.44	0.26	1.61	3.1367	0.962171534	0.045734578	0.420556148	-3.592648694	6.40E-05	0.003647202	BnaCnng64410D [Brassica napus]	-	-	-	-
MSTRG.89982	GLB3	0.81	1.24	0.95	1.57	1.6	1.79	2.57	3.8	2.1	2.8233	1.6533	1	-0.72537762	0.599071903	0.984859178	1.497399469	0.00043619	0.014913133	BnaA05g15640D [Brassica napus]	-	GO:0016020//membrane	GO:0022892//substrate-specific transporter activity;GO:0046906//tetrapyrrole binding;GO:0046914//transition metal ion binding	GO:0006950//response to stress;GO:0009725//response to hormone;GO:0015669//gas transport
MSTRG.90136	CIP7	0.54	1.85	1.83	0.67	0.32	0.22	0.26	0.24	1.63	0.71	0.4033	1.4067	1.802235951	0.000203067	0.013644714	-0.986389568	0.291942067	0.706143738	BnaA02g22140D [Brassica napus]	-	GO:0016020//membrane;GO:0044444//cytoplasmic part	-	-
MSTRG.90146	--	4.5	5.99	6.84	11.15	13.35	6.9	2.7	2.52	2.62	2.6133	10.4667	5.7767	-0.857492905	0.362640507	0.943283825	-1.144346095	0.001552132	0.035904089	BnaCnng50320D [Brassica napus]	-	-	-	-
MSTRG.90414	--	1	3.02	3.03	9.62	2.08	1.99	0.38	0.1	0.42	0.3	4.5633	2.35	-0.957427284	0.713082443	0.984859178	-2.969626351	0.000460592	0.015589733	Defensin-like (DEFL) family protein [Arabidopsis thaliana]	-	-	-	-
MSTRG.90855	GIP	0.02	0	0	0.76	0.5	0.05	0	0	0	0	0.4367	0.0067	-6.033423002	0.000134099	0.010038218	-2.736965594	0.825445526	0.931552167	Ribonuclease H-like superfamily [Arabidopsis thaliana x Arabidopsis arenosa]	ko01100//Metabolic pathways;ko00230//Purine metabolism;ko00240//Pyrimidine metabolism;ko03020//RNA polymerase	GO:0043231//intracellular membrane-bounded organelle	-	-
MSTRG.90856	COL5	1.02	2.1	2.73	0.15	0.32	0.45	2.45	1.29	3.32	2.3533	0.3067	1.95	2.668730858	8.02E-05	0.006910591	0.271231559	0.632298872	0.913487456	BnaC06g42420D [Brassica napus]	-	-	-	-
MSTRG.91301	At4g15430	1.43	4.05	4.91	3.32	13.12	0.72	0.76	0.11	0.48	0.45	5.72	3.4633	-0.723853899	0.913242644	0.984859178	-2.944164342	0.000526318	0.017142698	BnaA07g02900D [Brassica napus]	-	GO:0016020//membrane	-	GO:0001101//response to acid chemical;GO:0006970//response to osmotic stress;GO:0009725//response to hormone;GO:0010468//regulation of gene expression;GO:0048511//rhythmic process;GO:0048571//long-day photoperiodism
MSTRG.91357	ALDH3F1	1	1.05	1.07	2.48	1.87	1.06	0.18	0.11	0.24	0.1767	1.8033	1.04	-0.794082565	0.553174558	0.984859178	-2.557481764	0.000139165	0.006529664	BnaC09g47240D [Brassica napus]	ko01100//Metabolic pathways;ko01110//Biosynthesis of secondary metabolites;ko00010//Glycolysis / Gluconeogenesis;ko00620//Pyruvate metabolism;ko00561//Glycerolipid metabolism;ko00380//Tryptophan metabolism;ko00330//Arginine and proline metabolism;ko00053//Ascorbate and aldarate metabolism;ko00071//Fatty acid degradation;ko00280//Valine, leucine and isoleucine degradation;ko00410//beta-Alanine met…	GO:0043231//intracellular membrane-bounded organelle	GO:0016620//oxidoreductase activity, acting on the aldehyde or oxo group of donors, NAD or NADP as acceptor	GO:0009987//cellular process;GO:0044710//single-organism metabolic process;GO:0050896//response to stimulus
MSTRG.9154	--	56.89	31.95	28.15	28.23	30.08	40.64	75.81	122.9	69.28	89.33	32.9833	38.9967	0.241613605	0.177467867	0.762563668	1.195793951	0.000744202	0.021839821	unnamed protein product [Brassica napus]	-	-	-	-
MSTRG.91549	KAS1	0.11	0	0.05	0.05	0	0	0.55	1.1	1.7	1.1167	0.0167	0.0533	1.678071905	0.52575902	0.984859178	4.388017285	0.000250042	0.010094109	PREDICTED: 3-oxoacyl-[acyl-carrier-protein] synthase I, chloroplastic [Nelumbo nucifera]	ko01100//Metabolic pathways;ko01212//Fatty acid metabolism;ko00061//Fatty acid biosynthesis;ko00780//Biotin metabolism	-	-	-
MSTRG.91675	--	5.32	14.58	16.45	9.97	11.46	4.05	2	0.58	3.83	2.1367	8.4933	12.1167	0.512590087	0.049684019	0.439817215	-2.503559102	0.001436354	0.034140094	BnaCnng63690D, partial [Brassica napus]	-	-	-	-
MSTRG.91724	--	4.23	8.98	7.63	48.16	10.52	5.02	0.4	0	0	0.1333	21.2333	6.9467	-1.611938095	0.253049966	0.854231147	-5.703211467	5.11E-07	8.94E-05	PREDICTED: defensin-like protein 276 [Camelina sativa]	-	-	-	-
MSTRG.91781	--	0.03	3.99	4.53	0	0	0.06	0	0	10.25	3.4167	0.02	2.85	7.154818109	2.29E-05	0.002647001	0.261627585	1	1	BnaC09g30920D [Brassica napus]	-	-	-	-
MSTRG.91833	BCAT6	0.03	1.66	1.7	0.02	0.07	0.02	0.03	0	1.26	0.43	0.0367	1.13	4.945709844	0.000101461	0.008177018	-1.393914208	0.45200088	0.838911675	branched-chain-amino-acid aminotransferase 6 [Brassica rapa]	ko01100//Metabolic pathways;ko01110//Biosynthesis of secondary metabolites;ko01230//Biosynthesis of amino acids;ko00270//Cysteine and methionine metabolism;ko01210//2-Oxocarboxylic acid metabolism;ko00280//Valine, leucine and isoleucine degradation;ko00770//Pantothenate and CoA biosynthesis;ko00966//Glucosinolate biosynthesis;ko00290//Valine, leucine and isoleucine biosynthesis	GO:0043231//intracellular membrane-bounded organelle;GO:0044444//cytoplasmic part	GO:0004084//branched-chain-amino-acid transaminase activity;GO:0019787//ubiquitin-like protein transferase activity;GO:0046914//transition metal ion binding	GO:0000097//sulfur amino acid biosynthetic process;GO:0006549//isoleucine metabolic process;GO:0006551//leucine metabolic process;GO:0006573//valine metabolic process;GO:0006637//acyl-CoA metabolic process;GO:0006950//response to stress;GO:0009314//response to radiation;GO:0009404//toxin metabolic process;GO:0009683//indoleacetic acid metabolic process;GO:0019758//glycosinolate biosynthetic proce…
MSTRG.91935	--	0	5.27	5.94	0	0	0	0	0.14	3.3	1.1467	0	3.7367	11.86753616	0.000784419	0.034834489	-1.704305808	0.393856823	0.799989194	-	-	-	-	-
MSTRG.92069	SPH11	2.01	2.02	1.32	12.86	29.99	4.8	0	0	0	0	15.8833	1.7833	-3.154865418	7.55E-05	0.006607921	-10.80036068	2.00E-07	4.23E-05	BnaC04g43640D [Brassica napus]	-	-	-	-
MSTRG.92150	IAA26	0.16	0.13	0.07	0.46	0.86	0.97	0.95	1.58	1.44	1.3233	0.7633	0.12	-2.669278787	0.02154237	0.283272334	3.463070196	2.70E-05	0.001920645	auxin-responsive protein IAA26 [Brassica rapa]	ko04075//Plant hormone signal transduction	GO:0009536//plastid;GO:0016021//integral component of membrane	GO:0001071//nucleic acid binding transcription factor activity;GO:0003676//nucleic acid binding;GO:0005515//protein binding;GO:0016791//phosphatase activity	GO:0001101//response to acid chemical;GO:0006796//phosphate-containing compound metabolic process;GO:0006801//superoxide metabolic process;GO:0006970//response to osmotic stress;GO:0009267//cellular response to starvation;GO:0009409//response to cold;GO:0009411//response to UV;GO:0009620//response to fungus;GO:0009718//anthocyanin-containing compound biosynthetic process;GO:0009755//hormone-media…
MSTRG.92203	RPL28A	0.5	2	1.88	0.31	0	0	0	0	1.51	0.5033	0.1033	1.46	3.820590749	0.000906906	0.038013441	-1.53638232	0.384361205	0.791118804	PREDICTED: 60S ribosomal protein L28-2-like [Raphanus sativus]	ko03010//Ribosome	GO:0005911//cell-cell junction;GO:0009536//plastid;GO:0015934//large ribosomal subunit;GO:0016020//membrane;GO:0030312//external encapsulating structure	GO:0005198//structural molecule activity	GO:0006221//pyrimidine nucleotide biosynthetic process;GO:0009451//RNA modification;GO:0009725//response to hormone;GO:0010467//gene expression;GO:0016571//histone methylation;GO:0022613//ribonucleoprotein complex biogenesis;GO:0048580//regulation of post-embryonic development
MSTRG.92568	--	1.45	8.48	10.51	96.32	14.19	5.24	0.15	0	0.6	0.25	38.5833	6.8133	-2.501545092	0.099814361	0.608387764	-4.76836079	0.000142936	0.006662378	defensin-like protein 112 [Capsella rubella]	-	-	-	-
MSTRG.92767	WRKY7	1.59	2.99	2.99	0	9.38	11.89	7.96	11.77	4.75	8.16	7.09	2.5233	-1.490454828	0.426101992	0.971924566	1.693238353	0.000683712	0.020579397	WRKY62 transcription factor [Isatis tinctoria]	-	-	GO:0005515//protein binding	GO:0006950//response to stress;GO:0009628//response to abiotic stimulus;GO:0044238//primary metabolic process;GO:0044260//cellular macromolecule metabolic process
MSTRG.92787	CP29B	1.86	0.91	1.24	1.18	1.13	1.01	8.01	10.88	8.5	9.13	1.1067	1.3367	0.272418995	0.091851556	0.587771424	2.771975124	7.57E-17	2.26E-13	RNA-binding protein CP29B, chloroplastic [Brassica napus]	-	GO:0009526//plastid envelope;GO:0009532//plastid stroma;GO:0031976//plastid thylakoid;GO:0032991//macromolecular complex;GO:0044434//chloroplast part	GO:0008187//poly-pyrimidine tract binding;GO:0036094//small molecule binding	GO:0001101//response to acid chemical;GO:0006091//generation of precursor metabolites and energy;GO:0006396//RNA processing;GO:0009409//response to cold;GO:0009617//response to bacterium;GO:0009696//salicylic acid metabolic process;GO:0043487//regulation of RNA stability;GO:0045087//innate immune response;GO:0048511//rhythmic process
MSTRG.92893	--	0.05	0	0	0	0	0.26	0.4	3.01	0.39	1.2667	0.0867	0.0167	-2.378511623	0.550845065	0.984859178	6.247927513	0.000175579	0.007795962	binding protein, partial [Arabidopsis lyrata subsp. lyrata] [Arabidopsis lyrata]	-	GO:0016020//membrane	-	-
MSTRG.9544	--	39.13	80.42	77.76	0.4	193.2	192.47	383.82	667.01	71.66	374.1633	128.69	65.77	-0.968398376	0.636647988	0.984859178	2.508166611	0.000855238	0.023849409	-	-	-	-	-
MSTRG.956	--	87.32	34.76	29.07	53.82	58.57	90.85	139.46	221.74	81.99	147.73	67.7467	50.3833	-0.42720339	0.888105109	0.984859178	1.55194435	0.002405316	0.048366786	hypothetical protein F2Q70_00041661 [Brassica cretica]	-	-	-	-
ncbi_106345185	BNAA01G25300D	11.92	29.89	26.8	27.93	38.42	12.91	7.02	2.95	8.4	6.1233	26.42	22.87	-0.208174101	0.473460571	0.984859178	-1.90106724	0.001847093	0.040406859	BnaA01g25300D [Brassica napus]	-	GO:0043231//intracellular membrane-bounded organelle	-	-
ncbi_106345199	LOC106345199	4.11	7.18	7.36	3.38	2.19	2.75	0.77	0.23	4.65	1.8833	2.7733	6.2167	1.164520197	9.34E-05	0.007700007	-1.722852858	0.079930675	0.377474957	ABC transporter A family member 8 isoform X4 [Brassica rapa]	-	-	GO:0032550//purine ribonucleoside binding	-
ncbi_106345211	LOC106345211	2.67	6.28	5.28	6.86	8.3	0.94	0.72	0.96	0.6	0.76	5.3667	4.7433	-0.178125026	0.523708575	0.984859178	-2.641829932	8.50E-06	0.000794685	MLP-like protein 328 [Brassica rapa]	-	-	GO:0046914//transition metal ion binding	-
ncbi_106345241	LOC106345241	0.84	4.99	4.13	0	0.29	2.97	11.56	15.03	21.11	15.9	1.0867	3.32	1.611273778	0.256035924	0.857288854	2.259771619	0.000960694	0.025791127	BnaCnng23260D [Brassica napus]	ko01100//Metabolic pathways;ko00500//Starch and sucrose metabolism	-	-	GO:0048856//anatomical structure development
ncbi_106345288	LOC106345288	1.1	1.09	1.13	13.2	8.13	3.88	0.79	0.11	0.77	0.5567	8.4033	1.1067	-2.924740972	2.15E-07	6.82E-05	-0.991335139	0.284920138	0.699042156	auxin-responsive protein IAA31 isoform X1 [Brassica rapa]	ko04075//Plant hormone signal transduction	GO:0043231//intracellular membrane-bounded organelle	-	-
ncbi_106345371	LOC106345371	3.67	2.72	2.36	1.02	1.15	1.42	4.02	2.14	2.84	3	1.1967	2.9167	1.285299173	0.001058331	0.042500573	0.040641984	0.80151127	0.931552167	BnaA05g23260D [Brassica napus]	-	-	GO:0060089//molecular transducer activity	-
ncbi_106345423	LOC106345423	1.53	6.67	6.32	8.97	11.22	5.31	0.12	0.05	0.77	0.3133	8.5	4.84	-0.812455794	0.7090562	0.984859178	-3.949236886	0.00018496	0.008101455	plant invertase/pectin methylesterase inhibitor domain-containing protein [Arabidopsis thaliana]	-	-	GO:0052689//carboxylic ester hydrolase activity	-
ncbi_106345424	LOC106345424	1.53	6.67	6.32	8.97	11.22	5.31	0.12	0.05	0.77	0.3133	8.5	4.84	-0.812455794	0.7090562	0.984859178	-3.949236886	0.00018496	0.008101455	plant invertase/pectin methylesterase inhibitor domain-containing protein [Arabidopsis thaliana]	-	-	GO:0052689//carboxylic ester hydrolase activity	-
ncbi_106345432	BNAA05G26540D	0.84	1.45	1.06	0.31	0.44	0.64	5.08	2.76	2.98	3.6067	0.4633	1.1167	1.269076213	0.01680906	0.245741813	1.691467498	0.001117019	0.028540605	BnaA05g26540D [Brassica napus]	-	GO:0043231//intracellular membrane-bounded organelle	-	-
ncbi_106345451	LOC106345451	0.26	1.24	1.03	2.65	3.3	0.61	0	0.05	0	0.0167	2.1867	0.8433	-1.37455843	0.359633545	0.940903035	-5.66106548	0.000110176	0.005473403	BnaC06g14240D [Brassica napus]	-	GO:0043231//intracellular membrane-bounded organelle	-	-
ncbi_106345503	LOC106345503	1.67	1.44	2.01	3.44	3.7	1.69	0.22	0.14	0.07	0.1433	2.9433	1.7067	-0.786269628	0.57554501	0.984859178	-3.573735245	6.20E-05	0.003576444	BnaC05g41450D [Brassica napus]	ko01100//Metabolic pathways;ko00790//Folate biosynthesis	-	-	GO:0044257//cellular protein catabolic process
ncbi_106345514	LOC106345514	0.11	0.72	0.78	7.71	6.03	0.35	0.05	0	0.02	0.0233	4.6967	0.5367	-3.129539018	0.020531663	0.276098868	-4.523561956	0.001697159	0.03804067	BnaC05g41900D [Brassica napus]	-	-	GO:0046914//transition metal ion binding	-
ncbi_106345518	LOC106345518	39.27	99.9	89.64	93.23	93.88	81.41	10.87	1.39	19.09	10.45	89.5067	76.27	-0.230879442	0.554313498	0.984859178	-2.867612757	0.001044755	0.027257248	BnaC05g41990D [Brassica napus]	-	-	-	GO:0051707//response to other organism
ncbi_106345547	LOC106345547	0.74	1.72	1.68	5.36	6.87	3.42	0.06	0.01	0.02	0.03	5.2167	1.38	-1.918459984	0.00605553	0.13344453	-5.523561956	1.94E-06	0.000255371	BnaCnng49680D [Brassica napus]	-	-	-	GO:0071555//cell wall organization
ncbi_106345548	LOC106345548	0.74	1.72	1.68	5.36	6.87	3.42	0.06	0.01	0.02	0.03	5.2167	1.38	-1.918459984	0.00605553	0.13344453	-5.523561956	1.94E-06	0.000255371	BnaCnng49680D [Brassica napus]	-	-	-	GO:0071555//cell wall organization
ncbi_106345564	LOC106345564	1.27	1.97	1.27	2.27	2.79	1.34	0.32	0.25	0.24	0.27	2.1333	1.5033	-0.504944472	0.953648556	0.991237242	-2.47713362	0.002236558	0.046111286	40S ribosomal protein S17-3 [Brassica rapa]	ko03010//Ribosome	-	-	GO:1901576//organic substance biosynthetic process
ncbi_106345619	LOC106345619	13.48	16.46	14.75	86.71	87.18	40.11	0.37	0.12	0.6	0.3633	71.3333	14.8967	-2.259586847	5.63E-08	2.40E-05	-5.357552005	2.77E-16	6.94E-13	BnaC07g22700D [Brassica napus]	-	-	-	-
ncbi_106345686	LOC106345686	0.17	0.1	0.05	0.2	0.05	0.1	0.97	2.66	0.52	1.3833	0.1167	0.1067	-0.129283017	0.798504462	0.984859178	3.696967526	0.000367112	0.013213817	BnaCnng75630D [Brassica napus]	-	-	GO:0005488//binding	-
ncbi_106345707	LOC106345707	2.31	2.34	1.61	3.63	1.91	1.89	0.41	0.26	0.73	0.4667	2.4767	2.0867	-0.247199554	0.466822161	0.98329118	-2.16073583	0.000245664	0.00998934	homeobox-leucine zipper protein ATHB-20 [Brassica rapa]	-	-	GO:0044212//transcription regulatory region DNA binding	-
ncbi_106345717	LOC106345717	1.45	2.51	1.24	18.12	16.97	3.16	0.67	0.29	1.58	0.8467	12.75	1.7333	-2.878876219	0.000833886	0.036178991	-1.033683126	0.275374414	0.689229455	BnaA01g25400D [Brassica napus]	-	-	-	GO:0042254//ribosome biogenesis
ncbi_106345742	LOC106345742	5.72	7.19	6.07	15.99	17.1	10.82	1.79	1.25	2.14	1.7267	14.6367	6.3267	-1.210069542	0.020932419	0.278899006	-1.873455989	2.89E-05	0.002016026	BnaA06g01690D [Brassica napus]	-	GO:0009534//chloroplast thylakoid	-	-
ncbi_106345745	LOC106345745	0.36	0.47	0.6	2.24	1.56	0.49	0.05	0.02	0.04	0.0367	1.43	0.4767	-1.584962501	0.101795406	0.613794038	-3.700439718	9.29E-05	0.004814532	protein NRT1/ PTR FAMILY 1.2 [Brassica rapa]	-	GO:0016020//membrane	-	-
ncbi_106345773	LOC106345773	0.46	0.33	0.08	0.45	0.44	0.54	0.91	1.41	1.93	1.4167	0.4767	0.29	-0.716927841	0.733276842	0.984859178	2.288375535	0.001575639	0.036253694	BnaA06g00320D [Brassica napus]	-	-	-	-
ncbi_106345779	LOC106345779	2.58	3.09	3.32	20.75	27.16	4.04	0.15	0.23	0.9	0.4267	17.3167	2.9967	-2.530730728	0.002548403	0.07683062	-2.812177306	0.000524327	0.017106529	BnaA06g00210D [Brassica napus]	ko01100//Metabolic pathways;ko00195//Photosynthesis	-	GO:0046906//tetrapyrrole binding	-
ncbi_106345791	LOC106345791	0.59	3.04	2.8	2.59	5.15	1.46	0.22	0	0.25	0.1567	3.0667	2.1433	-0.516815124	0.927186049	0.986731763	-3.774086076	0.000676786	0.020411488	BnaA06g00750D [Brassica napus]	-	-	GO:0032550//purine ribonucleoside binding	-
ncbi_106345798	LOC106345798	4.77	3.14	3.12	2.2	3.36	9.09	10.11	10.19	8.16	9.4867	4.8833	3.6767	-0.409467874	0.85643307	0.984859178	1.367502871	9.93E-07	0.000150492	polyadenylate-binding protein-interacting protein 8-like [Brassica rapa]	-	-	GO:0097159//organic cyclic compound binding	-
ncbi_106345801	LOC106345801	0.59	3.04	2.8	2.59	5.15	1.46	0.22	0	0.25	0.1567	3.0667	2.1433	-0.516815124	0.927186049	0.986731763	-3.774086076	0.000676786	0.020411488	BnaA06g00750D [Brassica napus]	-	-	GO:0032550//purine ribonucleoside binding	-
ncbi_106345841	LOC106345841	0.07	7.6	10.49	0.07	0.08	0	0	0.09	10.89	3.66	0.05	6.0533	6.919657892	4.79E-07	0.000121748	-0.725886148	0.776179327	0.931552167	BnaA05g10620D [Brassica napus]	-	-	GO:0097159//organic cyclic compound binding	-
ncbi_106345845	LOC106345845	3.56	2.08	1.84	1.48	1.01	3.79	7.06	12.68	5.61	8.45	2.0933	2.4933	0.252273711	0.466155197	0.982762571	1.760875572	5.57E-05	0.003283578	BnaC02g25060D [Brassica napus]	-	-	GO:0046914//transition metal ion binding	-
ncbi_106345851	LOC106345851	12.59	19.73	18.94	51.73	32.64	16.7	7.56	9.39	7.88	8.2767	33.69	17.0867	-0.979449451	0.348554137	0.933498304	-1.045749217	0.001998483	0.042656639	BnaA01g37290D [Brassica napus]	-	-	GO:0051540//metal cluster binding	-
ncbi_106345900	LOC106345900	18.29	20.84	19.28	7.84	0.48	0.31	1.87	0.91	71.78	24.8533	2.8767	19.47	2.75878292	0.000340217	0.019636969	0.352186475	1	1	BnaA03g12940D [Brassica napus]	ko01100//Metabolic pathways;ko00260//Glycine, serine and threonine metabolism	-	-	GO:0044281//small molecule metabolic process
ncbi_106345909	LOC106345909	0.91	1.25	1.57	3.39	4.74	0.62	0.1	0	0.15	0.0833	2.9167	1.2433	-1.230107386	0.379939714	0.956342462	-3.89917563	1.94E-05	0.001494686	BAG family molecular chaperone regulator 1-like [Brassica rapa]	-	GO:0043231//intracellular membrane-bounded organelle	-	-
ncbi_106345917	LOC106345917	2.81	2.38	2.21	3.82	2.44	6.68	5.28	11.4	3.97	6.8833	4.3133	2.4667	-0.806240441	0.445240157	0.979771144	1.480544606	0.001025866	0.026972619	BnaA06g01060D [Brassica napus]	-	-	-	GO:0055065//metal ion homeostasis
ncbi_106345922	BNAA06G01010D	0	0	0.05	0	0	0.53	0.82	0.94	0.27	0.6767	0.1767	0.0167	-3.40599236	0.397949196	0.960403913	5.343407822	0.001355689	0.032702678	BnaA06g01010D [Brassica napus]	-	-	-	-
ncbi_106345931	LOC106345931	1.48	0.18	0.49	6.59	1.08	0.6	0	0.09	0.09	0.06	2.7567	0.7167	-1.94355067	0.186391672	0.775109329	-3.578267848	0.002452082	0.048995628	BnaA06g00900D [Brassica napus]	ko00520//Amino sugar and nucleotide sugar metabolism	-	GO:0048037//cofactor binding	-
ncbi_106345945	LOC106345945	1.85	2.26	2.06	7.21	5.71	4.65	1.43	0.56	1.88	1.29	5.8567	2.0567	-1.509771797	0.000371019	0.020721238	-0.672936923	0.280501204	0.694784306	BnaA07g05630D [Brassica napus]	-	-	-	-
ncbi_106345949	LOC106345949	5.33	7.11	5.87	19.53	16.01	12.67	3.52	1.75	4.69	3.32	16.07	6.1033	-1.396700639	0.000942412	0.039148499	-0.878414144	0.092727891	0.408529233	caseinolytic peptidase B protein homolog [Brassica rapa]	-	-	-	GO:0043170//macromolecule metabolic process
ncbi_106345957	LOC106345957	0.7	17.36	12.46	0.42	0.97	0.29	0.53	0.45	11.43	4.1367	0.56	10.1733	4.183221824	7.48E-06	0.001093773	-1.298251847	0.339972573	0.755228278	BnaA05g33140D [Brassica napus]	ko03010//Ribosome	GO:0030312//external encapsulating structure	-	-
ncbi_106345973	LOC106345973	1.23	2.36	1.8	0.55	0.34	0.64	0.7	0.41	1.96	1.0233	0.51	1.7967	1.81675362	0.000166411	0.011770217	-0.812046617	0.298188135	0.713133645	BnaA05g32890D [Brassica napus]	-	-	-	GO:0032412//regulation of ion transmembrane transporter activity
ncbi_106345979	BNAC03G71690D	86.28	277.95	261.26	123.5	134.04	63.06	46.26	18.81	54.03	39.7	106.8667	208.4967	0.964212394	0.004341694	0.10848328	-2.392813406	0.000246284	0.010003667	BnaC03g71690D [Brassica napus]	-	-	-	GO:0034614//cellular response to reactive oxygen species
ncbi_106345993	LOC106345993	0.84	1.21	1.04	4.17	6.53	0.47	0.28	0.09	0.12	0.1633	3.7233	1.03	-1.853950443	0.126761075	0.671955735	-2.656753184	0.000110978	0.005495681	BnaC03g14320D [Brassica napus]	-	-	-	GO:0071555//cell wall organization
ncbi_106345994	LOC106345994	1.41	1.02	1.04	8.4	4.95	4.35	0.23	0.1	0.3	0.21	5.9	1.1567	-2.350741792	1.87E-08	1.02E-05	-2.461511929	0.000335758	0.012472131	BnaC03g14350D [Brassica napus]	-	-	-	GO:0044238//primary metabolic process
ncbi_106346004	LOC106346004	25.41	21.15	19.13	51.1	32.43	24.5	8.01	5.14	9.22	7.4567	36.01	21.8967	-0.717686335	0.452979219	0.979771144	-1.554108509	3.56E-05	0.002358821	BnaC03g71830D, partial [Brassica napus]	ko03013//Nucleocytoplasmic transport	-	GO:0008135//translation factor activity, RNA binding	-
ncbi_106346033	LOC106346033	0.52	0.38	0.44	1.94	1.85	1.11	0.17	0.03	0.05	0.0833	1.6333	0.4467	-1.870548749	0.00011907	0.009247703	-2.422233001	0.005567437	0.08367514	BnaC03g14610D [Brassica napus]	-	-	-	GO:0043401//steroid hormone mediated signaling pathway
ncbi_106346061	LOC106346061	1.74	2.44	2.59	4.81	3.85	3.87	0.78	0.65	0.9	0.7767	4.1767	2.2567	-0.888158676	0.307715905	0.905003906	-1.538825879	0.000519549	0.017007754	splicing factor U2af large subunit B-like [Brassica rapa]	ko03040//Spliceosome	GO:0043231//intracellular membrane-bounded organelle	-	-
ncbi_106346066	LOC106346066	3.72	9.6	7.99	9.46	22.7	5.69	0.62	0.09	0.52	0.41	12.6167	7.1033	-0.828762707	0.686174532	0.984859178	-4.114800372	4.74E-07	8.44E-05	BnaA06g02370D [Brassica napus]	-	GO:0009534//chloroplast thylakoid	-	-
ncbi_106346073	LOC106346073	2.24	1.71	1.62	5.87	4.11	1.37	0.55	0.59	0.84	0.66	3.7833	1.8567	-1.026943065	0.371522393	0.950011406	-1.492176897	0.001040934	0.027239818	BnaA06g02520D [Brassica napus]	-	GO:0009534//chloroplast thylakoid	-	-
ncbi_106346084	LOC106346084	0.87	2.91	2.48	3.19	0.68	0.48	0.22	0.06	0.51	0.2633	1.45	2.0867	0.525147256	0.118568974	0.654274571	-2.986238099	0.000879531	0.02430888	beta-glucosidase-like SFR2, chloroplastic [Brassica rapa]	ko00561//Glycerolipid metabolism	-	-	GO:0019758//glycosinolate biosynthetic process
ncbi_106346086	LOC106346086	0	0	0	0	4.15	5.14	1.4	1.79	0	1.0633	3.0967	0	-11.59650038	0.020847815	0.278283315	10.05437821	0.000695128	0.020842309	CAS1 domain-containing protein 1-like isoform X2 [Brassica rapa]	-	GO:0043231//intracellular membrane-bounded organelle	-	-
ncbi_106346103	LOC106346103	1.09	0.67	0.58	1	2.28	1.42	3.16	4.1	1.77	3.01	1.5667	0.78	-1.006152227	0.323634366	0.915767197	1.948217458	4.93E-05	0.00300707	ubiquitin-like-specific protease 1A [Brassica rapa]	-	-	GO:0070011//peptidase activity, acting on L-amino acid peptides	-
ncbi_106346108	LOC106346108	6.4	7.6	6.53	2.35	11.76	13.26	17.54	26.96	12.55	19.0167	9.1233	6.8433	-0.414861807	0.918070361	0.984859178	1.474493259	6.49E-05	0.003690704	BnaC03g34900D [Brassica napus]	-	-	-	-
ncbi_106346135	LOC106346135	0.61	0.44	0.32	0.81	0.44	0.22	0.87	1.76	1.19	1.2733	0.49	0.4567	-0.101640262	0.391190998	0.958291179	1.479396745	0.000565228	0.017957341	presequence protease 2, chloroplastic/mitochondrial [Brassica rapa]	-	-	GO:0043169//cation binding	-
ncbi_106346136	LOC106346136	3.36	1.82	1.84	3.34	8.19	14.18	12.5	20.98	7.03	13.5033	8.57	2.34	-1.872786675	0.028030599	0.327501346	2.528735149	2.01E-07	4.23E-05	BnaA06g02970D [Brassica napus]	-	-	-	GO:0044085//cellular component biogenesis
ncbi_106346139	LOC106346139	1.25	1.97	0	2.77	0	0	0	0	0	0	0.9233	1.0733	0.217174712	0.787162393	0.984859178	-10.06788247	0.001344567	0.032474686	polyadenylate-binding protein RBP47A [Brassica rapa]	-	-	GO:0097159//organic cyclic compound binding	-
ncbi_106346155	LOC106346155	0.05	0.39	0.32	0.05	1.03	1.66	3.66	7.9	1.4	4.32	0.9133	0.2533	-1.85010457	0.268045385	0.868532681	4.091922489	8.01E-06	0.000762845	BnaA06g37690D [Brassica napus]	-	-	-	GO:0042254//ribosome biogenesis
ncbi_106346156	LOC106346156	73.69	225.7	223.3	120.79	321.75	117.23	33.6	40.83	55.87	43.4333	186.59	174.23	-0.098878612	0.493643956	0.984859178	-2.004118474	0.000230837	0.009556395	tubulin alpha-6 chain [Arabidopsis thaliana]	ko04145//Phagosome	-	-	GO:0051603//proteolysis involved in cellular protein catabolic process
ncbi_106346165	LOC106346165	4.5	4.4	3.66	14.82	13.57	7.31	0.7	0.55	1.98	1.0767	11.9	4.1867	-1.50708761	0.000127674	0.00969663	-1.959230394	0.001136923	0.028876945	BnaA06g02910D [Brassica napus]	ko01100//Metabolic pathways;ko01110//Biosynthesis of secondary metabolites;ko00100//Steroid biosynthesis	-	-	GO:0071555//cell wall organization
ncbi_106346187	LOC106346187	4.99	6.47	5.3	14.66	13.64	7.11	2.88	1.88	1.8	2.1867	11.8033	5.5867	-1.079134695	0.082546076	0.55849643	-1.353254429	0.001768931	0.039182072	reticulon-like protein B8 [Brassica rapa]	-	GO:0043231//intracellular membrane-bounded organelle	-	-
ncbi_106346203	LOC106346203	2.37	9.73	10.92	6.5	17.69	4.91	0.24	0.16	0.39	0.2633	9.7	7.6733	-0.33813132	0.762604441	0.984859178	-4.86489137	6.70E-10	3.78E-07	wall-associated receptor kinase-like 15 [Brassica rapa]	-	-	GO:0001871//pattern binding	-
ncbi_106346204	LOC106346204	75.33	198.26	192.45	589.98	453.31	148.91	13.65	3.68	25.55	14.2933	397.4	155.3467	-1.355100587	0.201971387	0.79874861	-3.442076975	5.84E-06	0.000596927	glutathione S-transferase U17 [Brassica rapa]	ko00480//Glutathione metabolism	-	-	GO:0048585//negative regulation of response to stimulus
ncbi_106346205	LOC106346205	16.41	48.8	45.07	109.13	120.97	42.43	5.71	1.21	8.24	5.0533	90.8433	36.76	-1.305243877	0.204720528	0.803514746	-2.862829514	0.000273571	0.010742087	BnaC05g07890D [Brassica napus]	ko00480//Glutathione metabolism	-	-	GO:0048585//negative regulation of response to stimulus
ncbi_106346214	LOC106346214	5.95	3.79	5.29	9.65	9.74	7.26	1.56	0.88	0.91	1.1167	8.8833	5.01	-0.826290524	0.260860609	0.863061747	-2.165612009	6.94E-06	0.000683355	pollen-specific protein SF3 [Brassica rapa]	-	-	GO:0046914//transition metal ion binding	-
ncbi_106346226	LOC106346226	5.36	3.43	3.89	3.09	3.06	3.62	10.13	17.49	13.85	13.8233	3.2567	4.2267	0.376124278	0.043502229	0.409765022	1.709513302	1.33E-08	4.55E-06	BnaA01g25720D [Brassica napus]	-	GO:0044437//vacuolar part	-	-
ncbi_106346234	LOC106346234	0.02	0.02	0.09	1.05	1	0.24	0	0	0.02	0.0067	0.7633	0.0433	-4.13876407	0.000440671	0.023265087	-2.700439718	0.299402532	0.714871588	probable rhamnogalacturonate lyase B [Brassica rapa]	-	-	-	GO:0044238//primary metabolic process
ncbi_106346272	LOC106346272	0.8	5.19	5.02	10.39	4.79	1.46	0.09	0.14	0.11	0.1133	5.5467	3.67	-0.595840965	0.890792556	0.984859178	-5.017135912	2.30E-07	4.71E-05	BnaC05g07050D [Brassica napus]	-	-	GO:0048037//cofactor binding	-
ncbi_106346274	LOC106346274	5.5	4.02	4.63	3.7	6.45	4.07	13.24	28.87	8.69	16.9333	4.74	4.7167	-0.007119412	0.261063975	0.863252851	1.844026444	0.000162423	0.007350366	BnaC05g07070D [Brassica napus]	-	-	-	-
ncbi_106346289	LOC106346289	15.19	22.38	22.09	38.83	51.16	15.02	7.09	4.35	9.73	7.0567	35.0033	19.8867	-0.815690838	0.605907207	0.984859178	-1.494742708	0.001241463	0.030665551	calreticulin-2-like [Brassica rapa]	ko04141//Protein processing in endoplasmic reticulum;ko04145//Phagosome	-	GO:0046872//metal ion binding	-
ncbi_106346311	LOC106346311	0.59	0.22	0.13	0.4	0.25	0.36	0.95	1.8	0.88	1.21	0.3367	0.3133	-0.103622631	0.667457695	0.984859178	1.949236886	0.001202206	0.030005761	myosin-9 [Brassica rapa]	-	-	-	GO:0051640//organelle localization
ncbi_106346322	LOC106346322	2.5	3.01	2.51	5.74	2.91	3.75	6.85	7.7	3.86	6.1367	4.1333	2.6733	-0.628665979	0.7622146	0.984859178	1.198815485	0.002048229	0.043426145	BnaA06g04960D [Brassica napus]	-	-	-	GO:0019725//cellular homeostasis
ncbi_106346324	LOC106346324	0.29	0.08	0	12.68	2.96	0.4	0	0.14	0	0.0467	5.3467	0.1233	-5.438005061	0.000248117	0.015683399	-1.402098444	0.612053703	0.913487456	BnaA06g04950D [Brassica napus]	ko04130//SNARE interactions in vesicular transport	-	-	GO:1902410//mitotic cytokinetic process
ncbi_106346354	LOC106346354	15.39	10.73	10.73	5.97	3.51	17.29	35.7	39.07	35.59	36.7867	8.9233	12.2833	0.46104748	0.324411124	0.916536686	1.582480837	5.79E-14	9.58E-11	histone H2B.2 [Brassica rapa]	-	-	GO:0046983//protein dimerization activity	-
ncbi_106346369	LOC106346369	0.83	1.69	2.51	4.46	5.07	2.45	0.24	0	0.15	0.13	3.9933	1.6767	-1.251997603	0.216024967	0.818376922	-3.689012371	0.000391655	0.013827501	GATA transcription factor 11-like [Brassica rapa]	-	-	GO:0046914//transition metal ion binding	-
ncbi_106346376	LOC106346376	20.26	15.21	13.79	56.87	37.11	33.72	6.82	4.62	8.17	6.5367	42.5667	16.42	-1.374269992	0.000408887	0.021968772	-1.328827092	0.000427854	0.014744854	L-ascorbate peroxidase 1, cytosolic-like isoform X1 [Brassica rapa]	ko00480//Glutathione metabolism;ko00053//Ascorbate and aldarate metabolism	-	GO:0046906//tetrapyrrole binding	-
ncbi_106346377	LOC106346377	20.26	15.02	13.79	56.87	37.11	33.72	6.82	4.62	8.17	6.5367	42.5667	16.3567	-1.379845349	0.000391233	0.021412868	-1.323251736	0.000457837	0.015523538	L-ascorbate peroxidase 1, cytosolic-like isoform X1 [Brassica rapa]	ko00480//Glutathione metabolism;ko00053//Ascorbate and aldarate metabolism	-	GO:0046906//tetrapyrrole binding	-
ncbi_106346391	LOC106346391	11.54	6.35	7.71	1.09	1.83	14.79	31.34	49.11	33.61	38.02	5.9033	8.5333	0.531579598	0.515372792	0.984859178	2.155577222	1.33E-11	1.21E-08	BnaA06g04170D [Brassica napus]	-	-	-	GO:0006950//response to stress
ncbi_106346397	LOC106346397	91.67	192.6	181.95	333.18	335.42	180.91	21.3	14.47	32.12	22.63	283.17	155.4067	-0.865620035	0.467356756	0.983470012	-2.779739904	5.40E-08	1.42E-05	cell wall / vacuolar inhibitor of fructosidase 1 [Brassica rapa]	-	-	GO:0052689//carboxylic ester hydrolase activity	-
ncbi_106346414	LOC106346414	20.43	34.51	28.32	159.83	72	29.48	3.12	0.67	5.27	3.02	87.1033	27.7533	-1.650066872	0.059823204	0.482623845	-3.200040603	1.29E-05	0.001099043	BnaA06g03920D [Brassica napus]	-	-	-	GO:0046942//carboxylic acid transport
ncbi_106346445	LOC106346445	2.36	2.54	3.04	6.96	8.47	1.85	1.08	1.23	0.75	1.02	5.76	2.6467	-1.121892305	0.311757292	0.907846216	-1.375607354	0.000258057	0.010318271	oxysterol-binding protein-related protein 1D [Brassica rapa]	-	-	GO:0032934//sterol binding	-
ncbi_106346458	LOC106346458	12.22	19.82	19.57	30.99	30.69	9.09	3.09	1.77	5.48	3.4467	23.59	17.2033	-0.455487289	0.749510141	0.984859178	-2.319414445	2.42E-05	0.001775233	BnaC05g09210D [Brassica napus]	ko01100//Metabolic pathways;ko01200//Carbon metabolism;ko00710//Carbon fixation in photosynthetic organisms	-	-	GO:0042254//ribosome biogenesis
ncbi_106346473	LOC106346473	0.1	0.68	0.6	0.92	0.83	0.05	0.02	0.02	0.05	0.03	0.6	0.46	-0.38332864	0.77016365	0.984859178	-3.938599455	0.001673648	0.037771003	BnaA06g09160D [Brassica napus]	ko04626//Plant-pathogen interaction	GO:0043231//intracellular membrane-bounded organelle	-	-
ncbi_106346480	LOC106346480	5.59	3.03	3.28	4.3	3.05	3.23	8.01	12.47	6.53	9.0033	3.5267	3.9667	0.169621946	0.082019498	0.556840653	1.182532066	0.001416862	0.033780794	BnaA06g09090D [Brassica napus]	-	-	-	GO:0006605//protein targeting
ncbi_106346493	LOC106346493	0.6	1.44	0.87	4.85	3.92	3.57	0.05	0.05	0.15	0.0833	4.1133	0.97	-2.084251336	0.002508963	0.076351204	-3.541019153	0.000821942	0.023271491	BnaA06g08980D [Brassica napus]	ko01100//Metabolic pathways;ko00195//Photosynthesis	-	GO:0046872//metal ion binding	-
ncbi_106346563	LOC106346563	1.66	6.73	6.81	46.04	84.72	14.73	1.96	1.02	2.11	1.6967	48.4967	5.0667	-3.258776767	0.000366167	0.020524286	-1.578333762	0.029613424	0.222657767	superoxide dismutase [Fe] 1, chloroplastic [Brassica rapa]	ko04146//Peroxisome	-	-	GO:0048511//rhythmic process
ncbi_106346583	LOC106346583	3.18	4.66	3.61	5.54	0.76	0.3	0.71	0.25	0.59	0.5167	2.2	3.8167	0.794809669	0.085760381	0.568155596	-2.885007478	1.16E-06	0.000171065	BnaC04g29970D [Brassica napus]	-	GO:0043231//intracellular membrane-bounded organelle	-	-
ncbi_106346620	LOC106346620	138.86	47.52	43.12	14.63	12.29	67.77	363.04	404.18	357.3	374.84	31.5633	76.5	1.277210175	0.094131681	0.594053183	2.292743261	5.40E-07	9.19E-05	BnaA06g09700D [Brassica napus]	ko01100//Metabolic pathways;ko01110//Biosynthesis of secondary metabolites;ko00940//Phenylpropanoid biosynthesis;ko00500//Starch and sucrose metabolism;ko00460//Cyanoamino acid metabolism	-	-	GO:0044238//primary metabolic process
ncbi_106346648	LOC106346648	0.7	1.36	1.43	2.86	1.46	0.08	0.13	0.03	0.21	0.1233	1.4667	1.1633	-0.334276487	0.680531282	0.984859178	-3.237629861	0.00011797	0.005775714	BnaA06g10270D [Brassica napus]	-	-	-	GO:1902410//mitotic cytokinetic process
ncbi_106346652	LOC106346652	18.1	28.17	27.99	18.36	19.02	10.35	12.74	9.56	11.14	11.1467	15.91	24.7533	0.637688979	0.000458519	0.023824109	-1.151010468	0.00230051	0.046950129	BnaA06g10210D [Brassica napus]	-	-	GO:0032550//purine ribonucleoside binding	-
ncbi_106346659	LOC106346659	2.46	2.41	1.73	1.79	0.74	0.55	1.2	2.86	4.41	2.8233	1.0267	2.2	1.099535674	0.000763653	0.034443316	0.359895945	0.487521425	0.852226486	BnaA06g10130D [Brassica napus]	ko03008//Ribosome biogenesis in eukaryotes	GO:0043231//intracellular membrane-bounded organelle	-	-
ncbi_106346666	LOC106346666	109.81	66.91	61.79	62.77	30.51	97.82	134.03	204.79	144.14	160.9867	63.7	79.5033	0.319721977	0.260220166	0.862316951	1.017853951	0.000331052	0.012368249	LOW QUALITY PROTEIN: SNF1-related protein kinase regulatory subunit gamma-like PV42a [Brassica rapa]	-	-	-	GO:0048868//pollen tube development
ncbi_106346676	LOC106346676	2.88	4.06	5.33	1.61	1.85	1.95	7.56	2.49	4.73	4.9267	1.8033	4.09	1.18143475	0.001089173	0.043273131	0.26851102	0.581026321	0.901855765	BnaA06g09930D [Brassica napus]	-	-	-	-
ncbi_106346685	LOC106346685	11.06	5.72	5.53	3.57	1.34	11.67	18.21	18.42	16.88	17.8367	5.5267	7.4367	0.428246507	0.449223076	0.979771144	1.262118015	5.53E-05	0.00327048	MATE efflux family protein 7-like [Brassica rapa]	-	-	-	GO:0044763//single-organism cellular process
ncbi_106346700	LOC106346700	7.06	14.9	14.56	32.42	11.84	7.63	2	1.4	4.82	2.74	17.2967	12.1733	-0.506769771	0.788638791	0.984859178	-2.151476466	0.000578675	0.018234776	BnaA06g11610D [Brassica napus]	ko01100//Metabolic pathways;ko01200//Carbon metabolism;ko01230//Biosynthesis of amino acids;ko01210//2-Oxocarboxylic acid metabolism;ko00710//Carbon fixation in photosynthetic organisms;ko00250//Alanine, aspartate and glutamate metabolism;ko00220//Arginine biosynthesis	-	GO:0046914//transition metal ion binding	-
ncbi_106346722	LOC106346722	13.4	31.8	32.99	33.89	40.96	17.18	9.97	3.43	6.17	6.5233	30.6767	26.0633	-0.235120121	0.491613261	0.984859178	-1.998340352	0.001336044	0.032359317	ocs element-binding factor 1-like [Brassica rapa]	-	-	GO:0046983//protein dimerization activity	-
ncbi_106346745	BNAA06G11320D	39.21	15.76	12.9	11.53	3.61	43.58	58.75	90.88	59.2	69.61	19.5733	22.6233	0.208922045	0.673284356	0.984859178	1.621483063	0.000252003	0.010156802	BnaC05g12860D [Brassica napus]	-	GO:0043231//intracellular membrane-bounded organelle	-	-
ncbi_106346756	LOC106346756	0.02	0.1	0.03	2.79	0.9	0.14	0.02	0	0	0.0067	1.2767	0.05	-4.674309986	0.000547866	0.027236504	-2.906890596	0.16838477	0.547934926	BnaA06g11160D [Brassica napus]	-	-	-	GO:0044763//single-organism cellular process
ncbi_106346762	LOC106346762	1.86	3.8	3.54	10.66	7.55	2.59	0.67	0.57	0.97	0.7367	6.9333	3.0667	-1.176877762	0.314145404	0.909532816	-2.057587492	0.00019672	0.008482742	BnaC05g12600D [Brassica napus]	-	GO:0016020//membrane	-	-
ncbi_106346798	LOC106346798	14.33	17.04	16.17	8.08	5.92	8.61	19.66	14.61	17.97	17.4133	7.5367	15.8467	1.072180911	0.000216679	0.014255798	0.136012994	0.350124209	0.7636081	cinnamoyl-CoA reductase 1 [Brassica rapa]	ko01100//Metabolic pathways;ko01110//Biosynthesis of secondary metabolites;ko00940//Phenylpropanoid biosynthesis	-	-	GO:0048511//rhythmic process
ncbi_106346834	LOC106346834	0.31	0.84	0.62	2.98	1.16	0.15	0.04	0.06	0.08	0.06	1.43	0.59	-1.277228287	0.523757306	0.984859178	-3.297680549	9.82E-05	0.005007218	homeobox-leucine zipper protein HDG12 [Brassica rapa]	-	GO:0043231//intracellular membrane-bounded organelle	-	-
ncbi_106346895	LOC106346895	1.81	2.34	2.1	8.42	12.46	1.64	0.1	0.1	0.19	0.13	7.5067	2.0833	-1.849278733	0.063340948	0.497311943	-4.002310161	7.32E-08	1.84E-05	BnaA06g12390D [Brassica napus]	-	-	-	GO:1902410//mitotic cytokinetic process
ncbi_106346920	LOC106346920	0.86	0.77	0.65	2.48	8.09	3.27	0.26	0.26	0.25	0.2567	4.6133	0.76	-2.601738213	0.000897453	0.037839288	-1.566103473	0.033463629	0.238290285	PLASMODESMATA CALLOSE-BINDING PROTEIN 1-like isoform X1 [Brassica rapa]	-	GO:0031224//intrinsic component of membrane	-	-
ncbi_106346926	LOC106346926	2.37	2.38	1.12	7.27	6.93	7.86	1.4	1.06	1.83	1.43	7.3533	1.9567	-1.910000382	0.001093458	0.043399108	-0.452382856	0.444069228	0.833254097	BnaA06g12890D [Brassica napus]	-	-	-	GO:0010243//response to organonitrogen compound
ncbi_106346938	LOC106346938	28.07	26.38	31.52	28.46	20.78	23.24	62.71	67.25	67.92	65.96	24.16	28.6567	0.246250351	0.013487928	0.216627747	1.202720593	1.95E-08	6.05E-06	thioredoxin H-type 2 [Brassica rapa]	-	GO:0044444//cytoplasmic part	-	-
ncbi_106346944	LOC106346944	0.05	0.28	0.5	0.34	3.39	0.27	0	0	0	0	1.3333	0.2767	-2.268816758	0.167061686	0.74449983	-8.112005026	0.001646648	0.03734596	BnaA01g26600D [Brassica napus]	-	GO:0043231//intracellular membrane-bounded organelle	-	-
ncbi_106346945	LOC106346945	0.22	0.04	0.04	7.17	5.87	0.95	0.04	0.09	0.17	0.1	4.6633	0.1	-5.543289652	4.53E-07	0.000118055	0	0.96561632	0.996044471	BnaA06g13830D [Brassica napus]	ko01100//Metabolic pathways;ko01110//Biosynthesis of secondary metabolites;ko00860//Porphyrin metabolism	-	GO:0052689//carboxylic ester hydrolase activity	-
ncbi_106346960	LOC106346960	0.04	0.26	0.07	2.69	1.12	1.04	0	0	0.17	0.0567	1.6167	0.1233	-3.712387571	0.000323143	0.018950418	-1.121990524	0.607639267	0.913487456	BnaA06g38500D [Brassica napus]	-	-	-	-
ncbi_106346976	LOC106346976	7.12	3.28	3.34	3.23	4.06	3.63	10.03	19.87	7.42	12.44	3.64	4.58	0.331409148	0.08925972	0.5794995	1.441566982	0.002371681	0.047931142	BnaA01g26650D [Brassica napus]	-	GO:0044444//cytoplasmic part	-	-
ncbi_106346981	LOC106346981	0.84	1.49	1.51	2.7	1.94	0.65	0.22	0.19	0.5	0.3033	1.7633	1.28	-0.462161411	0.778766267	0.984859178	-2.077167861	0.00191304	0.041398184	BnaA06g14140D [Brassica napus]	ko01100//Metabolic pathways;ko00230//Purine metabolism;ko00920//Sulfur metabolism;ko00450//Selenocompound metabolism;ko00261//Monobactam biosynthesis	-	-	GO:0043094//cellular metabolic compound salvage
ncbi_106346989	LOC106346989	1.23	1.39	0.9	6.37	5.33	2.7	0.57	0.41	0.16	0.38	4.8	1.1733	-2.032421478	5.49E-05	0.005216834	-1.626541604	0.011818724	0.132784733	BnaA06g14020D [Brassica napus]	-	-	GO:0046872//metal ion binding	-
ncbi_106347042	LOC106347042	0.16	2.4	1.93	0.05	0.05	0.1	0.05	0	2.19	0.7467	0.0667	1.4967	4.48864354	8.79E-05	0.007423818	-1.003216713	0.561562358	0.887339973	BnaC09g09000D [Brassica napus]	-	GO:0044437//vacuolar part	-	-
ncbi_106347043	LOC106347043	1.6	8.56	7.82	2.16	1.59	1.52	1.77	2.31	11.74	5.2733	1.7567	5.9933	1.770518154	0.000454827	0.023756869	-0.184643421	0.8307881	0.934214822	zinc finger CCCH domain-containing protein 19 [Brassica rapa]	-	-	GO:0046914//transition metal ion binding	-
ncbi_106347045	LOC106347045	9.6	115.27	119.74	13.03	10.81	9.01	4.61	7.89	79.06	30.52	10.95	81.5367	2.896518109	3.02E-05	0.003316641	-1.417694016	1	1	BnaC09g09060D [Brassica napus]	-	-	GO:0033218//amide binding	-
ncbi_106347047	LOC106347047	0.27	2.77	2	0.09	0.06	0.03	0	0	2.77	0.9233	0.06	1.68	4.807354922	9.87E-07	0.000223594	-0.863537757	0.658532586	0.913487456	BnaC09g09140D [Brassica napus]	-	-	-	GO:1902410//mitotic cytokinetic process
ncbi_106347048	BNAC09G09130D	0.39	4.84	5.63	0.25	0.04	0.31	0.48	0.23	6.8	2.5033	0.2	3.62	4.177917792	2.06E-05	0.002446523	-0.53213929	0.683454604	0.923535615	BnaC09g09130D [Brassica napus]	-	-	-	GO:0010043//response to zinc ion
ncbi_106347049	BNAC09G09160D	0.7	5.32	3.91	0.74	0.4	0.62	0.78	1.18	11.8	4.5867	0.5867	3.31	2.496218289	0.000226046	0.014674548	0.470614847	0.678931162	0.920992813	BnaC09g09160D [Brassica napus]	-	-	GO:0046915//transition metal ion transmembrane transporter activity	-
ncbi_106347050	LOC106347050	0.27	4.45	4.11	0.05	0.02	0.17	0.02	0.11	4.2	1.4433	0.08	2.9433	5.201307127	2.98E-06	0.00052882	-1.028046413	1	1	transportin-1 [Brassica rapa]	-	GO:0044444//cytoplasmic part	-	-
ncbi_106347053	LOC106347053	0.88	2.88	3.24	1.04	0.63	0.51	0.91	1.26	3.7	1.9567	0.7267	2.3333	1.683026787	0.000287951	0.017564593	-0.253994419	0.750793245	0.931552167	LOW QUALITY PROTEIN: F-box/LRR-repeat protein 10 [Brassica rapa]	-	GO:0044424//intracellular part	-	-
ncbi_106347055	LOC106347055	0.6	6.6	6.66	0.43	0.43	0.35	0.2	0.48	6.68	2.4533	0.4033	4.62	3.517848305	2.90E-06	0.000517915	-0.913149586	1	1	BnaC09g09230D [Brassica napus]	ko04141//Protein processing in endoplasmic reticulum	-	-	-
ncbi_106347063	LOC106347063	0.84	1.49	1.51	2.7	1.94	0.65	0.22	0.19	0.5	0.3033	1.7633	1.28	-0.462161411	0.778766267	0.984859178	-2.077167861	0.00191304	0.041398184	BnaA06g14140D [Brassica napus]	ko01100//Metabolic pathways;ko00230//Purine metabolism;ko00920//Sulfur metabolism;ko00450//Selenocompound metabolism;ko00261//Monobactam biosynthesis	-	-	GO:0043094//cellular metabolic compound salvage
ncbi_106347086	LOC106347086	15.28	25.9	28.54	12.72	11.16	14.27	5.52	1.88	6.14	4.5133	12.7167	23.24	0.869889512	0.003008739	0.085547211	-2.364344831	7.34E-05	0.004031231	BnaCnng20650D [Brassica napus]	ko01100//Metabolic pathways;ko00330//Arginine and proline metabolism	-	GO:0046914//transition metal ion binding	-
ncbi_106347102	LOC106347102	1.14	2	1.91	2.99	4.09	1.45	0.52	0.38	0.23	0.3767	2.8433	1.6833	-0.756262354	0.704825027	0.984859178	-2.159960615	0.000395238	0.013914193	BnaC01g17520D [Brassica napus]	-	-	-	GO:0071704//organic substance metabolic process
ncbi_106347160	LOC106347160	0.46	0.92	1.14	1.98	2.34	0.53	0.04	0	0.08	0.04	1.6167	0.84	-0.944561014	0.632323588	0.984859178	-4.392317423	0.000144791	0.006730998	tetraketide alpha-pyrone reductase 2-like [Brassica rapa]	-	-	GO:0048037//cofactor binding	-
ncbi_106347225	LOC106347225	0.1	2.38	2.02	0.13	0.13	0.06	0.06	0.08	0.19	0.11	0.1067	1.5	3.813781191	1.61E-05	0.002041544	-3.769387072	0.000467787	0.015757818	BnaC06g31140D [Brassica napus]	-	GO:0043231//intracellular membrane-bounded organelle	-	-
ncbi_106347228	LOC106347228	0.03	5.29	4.27	0	0.09	0	0.1	0	0.1	0.0667	0.03	3.1967	6.735462004	3.13E-05	0.003396966	-5.58345891	0.000257686	0.010318271	BnaC06g31180D [Brassica napus]	-	GO:0043231//intracellular membrane-bounded organelle	-	-
ncbi_106347230	LOC106347230	13.74	8.06	6.7	8.02	7.85	1.2	1.53	0.92	1.38	1.2767	5.69	9.5	0.739498861	0.029241388	0.335016223	-2.895545622	2.92E-11	2.36E-08	BnaC01g34490D [Brassica napus]	ko01100//Metabolic pathways;ko01110//Biosynthesis of secondary metabolites;ko00940//Phenylpropanoid biosynthesis;ko00500//Starch and sucrose metabolism;ko00460//Cyanoamino acid metabolism	-	-	GO:0044238//primary metabolic process
ncbi_106347231	LOC106347231	0.08	1.8	1.72	0.21	0.05	0.18	0	0.05	0.1	0.05	0.1467	1.2	3.032421478	0.002142897	0.068939415	-4.584962501	0.000866203	0.024077467	BnaC06g31190D [Brassica napus]	-	GO:0043231//intracellular membrane-bounded organelle	-	-
ncbi_106347236	LOC106347236	0.23	1.59	1.54	1.36	1.73	0.24	0.04	0.03	0.05	0.04	1.11	1.12	0.012939056	0.516548	0.984859178	-4.807354922	3.18E-05	0.002174721	BnaC06g31310D [Brassica napus]	-	-	-	GO:0044786//cell cycle DNA replication
ncbi_106347260	LOC106347260	0.81	1.23	1.37	1.91	2.32	0.76	0.25	0.2	0.35	0.2667	1.6633	1.1367	-0.549268076	0.931278971	0.987823167	-2.091699834	0.000131187	0.006222939	BnaC06g09990D [Brassica napus]	-	-	-	GO:0019725//cellular homeostasis
ncbi_106347332	LOC106347332	55.24	7.81	8.58	98.65	7.66	5.4	2.14	0.94	4.19	2.4233	37.2367	23.8767	-0.641122491	1	1	-3.300536673	0.00027719	0.010838945	extensin-3 [Brassica rapa]	-	-	-	GO:0071555//cell wall organization
ncbi_106347367	LOC106347367	0.44	0.81	0.78	6.48	7.05	0.4	0.06	0	0	0.02	4.6433	0.6767	-2.778643625	0.017474547	0.251440079	-5.080373416	0.000277056	0.010838945	BnaA06g15290D [Brassica napus]	-	GO:0043231//intracellular membrane-bounded organelle	-	-
ncbi_106347375	LOC106347375	0.19	0.1	0.02	9.5	8.13	0.45	0.02	0	0	0.0067	6.0267	0.1033	-5.865982652	5.15E-07	0.000129655	-3.95419631	0.073130617	0.360743994	BnaA06g15390D [Brassica napus]	-	GO:0044437//vacuolar part	-	-
ncbi_106347376	LOC106347376	15.2	24.09	23.37	70.44	87.32	18.94	7.65	8.26	8.84	8.25	58.9	20.8867	-1.495685365	0.091832034	0.587771424	-1.340116245	9.43E-05	0.004867454	BnaC05g17000D [Brassica napus]	-	GO:0044437//vacuolar part	-	-
ncbi_106347406	LOC106347406	5.15	7.92	6.96	3.7	3.1	8.02	13.9	18.74	17.44	16.6933	4.94	6.6767	0.434616974	0.206348972	0.806473359	1.322072141	3.47E-05	0.002309248	BnaAnng27730D [Brassica napus]	ko01100//Metabolic pathways;ko01230//Biosynthesis of amino acids;ko00630//Glyoxylate and dicarboxylate metabolism;ko00250//Alanine, aspartate and glutamate metabolism;ko00910//Nitrogen metabolism;ko00220//Arginine biosynthesis	-	GO:0046914//transition metal ion binding	-
ncbi_106347426	LOC106347426	0.14	2.92	2.01	1.8	1.65	0.57	0.04	0.08	0.07	0.0633	1.34	1.69	0.334790246	0.316443068	0.910201374	-4.737914424	6.33E-05	0.003627803	protein IQ-DOMAIN 14 isoform X2 [Brassica rapa]	-	GO:0043231//intracellular membrane-bounded organelle	-	-
ncbi_106347484	LOC106347484	1.72	2.28	1.96	1.2	1.35	3.42	6.15	7.24	5.26	6.2167	1.99	1.9867	-0.002418601	0.635902829	0.984859178	1.645791395	1.34E-06	0.000190312	BnaA01g27890D [Brassica napus]	ko04144//Endocytosis	-	GO:0046914//transition metal ion binding	-
ncbi_106347491	LOC106347491	9.36	7.81	8.25	28.04	20.39	23.77	12.68	13.41	8.88	11.6567	24.0667	8.4733	-1.506034807	0.000509436	0.025736232	0.460153766	0.076841153	0.369620064	ras-related protein RABB1b-like [Brassica rapa]	-	-	-	GO:0035556//intracellular signal transduction
ncbi_106347492	LOC106347492	39.56	78.87	76.94	140.95	201.99	155.94	11.87	6.13	22.57	13.5233	166.2933	65.1233	-1.352483882	0.054090647	0.459633244	-2.267723744	0.000185576	0.008113951	serine carboxypeptidase-like 48 [Brassica rapa]	-	-	-	GO:0016485//protein processing
ncbi_106347498	LOC106347498	1.07	2.12	1.67	3.24	6.12	0.77	0	0.06	0.17	0.0767	3.3767	1.62	-1.059605955	0.550964593	0.984859178	-4.401250548	3.43E-05	0.002293002	classical arabinogalactan protein 9 [Brassica rapa]	-	-	-	-
ncbi_106347558	LOC106347558	20.4	24.44	22.02	50.74	52	10.46	3.96	3.37	6.85	4.7267	37.7333	22.2867	-0.759658698	0.791031918	0.984859178	-2.237285822	2.60E-08	7.77E-06	tubulin beta-2 chain [Camelina sativa]	ko04145//Phagosome	-	-	GO:0043623//cellular protein complex assembly
ncbi_106347569	LOC106347569	3.84	4.55	4.8	15.54	13.21	3.96	1.65	0.52	1.52	1.23	10.9033	4.3967	-1.310287195	0.118923104	0.655150375	-1.837751843	0.001279042	0.031349809	lysosomal beta glucosidase [Brassica rapa]	ko01100//Metabolic pathways;ko01110//Biosynthesis of secondary metabolites;ko00940//Phenylpropanoid biosynthesis;ko00500//Starch and sucrose metabolism;ko00460//Cyanoamino acid metabolism	GO:0044444//cytoplasmic part	-	-
ncbi_106347591	LOC106347591	2.65	5.58	3.68	40.39	64.63	10.85	0.25	0.06	0.54	0.2833	38.6233	3.97	-3.282261767	2.23E-05	0.002589683	-3.808566762	3.27E-06	0.000386147	dirigent protein 3 [Brassica rapa]	-	-	-	GO:0033554//cellular response to stress
ncbi_106347644	BNACNNG69290D	9.11	10.58	11.11	3.79	3.93	6.28	10.36	7.31	10.29	9.32	4.6667	10.2667	1.137503524	0.001358864	0.049993385	-0.13956599	0.789286697	0.931552167	BnaCnng69290D [Brassica napus]	-	GO:0043231//intracellular membrane-bounded organelle	-	-
ncbi_106347645	LOC106347645	0.77	1.89	1.33	0.87	1.34	0.42	0.28	0.13	0.06	0.1567	0.8767	1.33	0.601325947	0.049006943	0.436756036	-3.085656085	7.79E-05	0.004210895	probable inactive receptor kinase At5g67200 [Brassica rapa]	-	-	-	GO:0034968//histone lysine methylation
ncbi_106347657	LOC106347657	1.55	3.76	3.61	7.03	6	0.92	0.68	0.32	0.69	0.5633	4.65	2.9733	-0.645149507	0.968536088	0.993998296	-2.400020464	8.45E-05	0.004462853	BnaA03g43320D [Brassica napus]	ko01100//Metabolic pathways;ko00500//Starch and sucrose metabolism	-	-	GO:0044093//positive regulation of molecular function
ncbi_106347677	LOC106347677	0.37	0.48	0.59	1.83	3.07	0.61	0.05	0.06	0.03	0.0467	1.8367	0.48	-1.935983507	0.040601514	0.396744883	-3.362570079	0.000464096	0.01566134	BnaC02g38940D [Brassica napus]	-	-	-	GO:0044238//primary metabolic process
ncbi_106347708	LOC106347708	15.52	14.91	10.29	7.84	9.29	29.43	4.77	1.66	5.43	3.9533	15.52	13.5733	-0.193353497	0.907185225	0.984859178	-1.779633552	0.001810035	0.039820249	BnaC02g38970D [Brassica napus]	-	GO:0031224//intrinsic component of membrane	-	-
ncbi_106347711	LOC106347711	5.22	5.79	4.32	20.06	18.36	4.31	1.14	0.8	1.18	1.04	14.2433	5.11	-1.47889162	0.083114585	0.560102774	-2.296739763	2.41E-09	1.07E-06	tubulin beta-2 chain [Camelina sativa]	ko04145//Phagosome	-	-	GO:0043623//cellular protein complex assembly
ncbi_106347713	LOC106347713	55.22	31.85	32.14	17.69	11.93	49.03	81.29	105.84	88.55	91.8933	26.2167	39.7367	0.599986591	0.216275942	0.818703991	1.209489344	3.85E-06	0.000437944	asparagine synthetase [glutamine-hydrolyzing]-like [Brassica rapa]	ko01100//Metabolic pathways;ko01110//Biosynthesis of secondary metabolites;ko00250//Alanine, aspartate and glutamate metabolism	-	-	GO:0034285//response to disaccharide
ncbi_106347729	LOC106347729	0.11	0.29	0.19	1.15	0.19	0.02	0	0	0	0	0.4533	0.1967	-1.204819792	0.739530831	0.984859178	-7.619608644	0.001601444	0.036649207	BnaC02g36400D [Brassica napus]	-	-	GO:0016411//acylglycerol O-acyltransferase activity	-
ncbi_106347749	LOC106347749	2.88	2.56	2.32	6.97	7.76	5.31	4.31	2.7	3.42	3.4767	6.68	2.5867	-1.368753951	0.001120707	0.0440355	0.4266106	0.168272151	0.547695992	protein MID1-COMPLEMENTING ACTIVITY 1 [Brassica rapa]	-	-	-	GO:0070588//calcium ion transmembrane transport
ncbi_106347769	LOC106347769	16.04	14.61	11.37	32.63	25.3	12.28	5.15	5.63	8.42	6.4	23.4033	14.0067	-0.740600366	0.561428904	0.984859178	-1.129969851	0.000714994	0.021278457	calnexin homolog 1 [Brassica rapa]	ko04141//Protein processing in endoplasmic reticulum;ko04145//Phagosome	-	-	GO:0051234//establishment of localization
ncbi_106347801	LOC106347801	1.35	1.19	0.96	1.7	3.35	2.23	3.13	3.07	3.36	3.1867	2.4267	1.1667	-1.056583528	0.218655178	0.821709292	1.449655696	1.56E-05	0.00128243	BnaA03g13540D [Brassica napus]	-	-	-	-
ncbi_106347818	LOC106347818	13.05	11.84	12.6	14.14	6.66	5.44	3.95	2.83	5.76	4.18	8.7467	12.4967	0.514738106	0.000908138	0.038013441	-1.579968477	5.93E-05	0.003460837	BnaA04g23490D [Brassica napus]	-	-	-	GO:0044767//single-organism developmental process
ncbi_106347820	LOC106347820	44.66	47.47	44.98	126.38	103.62	72.22	34.26	27.04	44.17	35.1567	100.74	45.7033	-1.14026534	0.000717587	0.032898748	-0.378501101	0.293729008	0.708483517	auxin-responsive protein IAA9-like isoform X2 [Brassica rapa]	ko04075//Plant hormone signal transduction	-	-	GO:0045087//innate immune response
ncbi_106347832	LOC106347832	12.94	18.94	18.62	36.36	30.69	9.66	4.92	4.87	7.7	5.83	25.57	16.8333	-0.603131273	0.970815906	0.994231292	-1.529753099	7.57E-05	0.004108518	delta-1-pyrroline-5-carboxylate dehydrogenase 12A1, mitochondrial [Brassica rapa]	ko01100//Metabolic pathways;ko00330//Arginine and proline metabolism;ko00250//Alanine, aspartate and glutamate metabolism	-	GO:0046914//transition metal ion binding	-
ncbi_106347839	LOC106347839	2.81	2.01	2.2	4.23	1.93	2.32	4.39	5.06	4.71	4.72	2.8267	2.34	-0.272593234	0.631380243	0.984859178	1.01227833	1.57E-05	0.001286756	BnaA06g22060D [Brassica napus]	-	-	-	GO:0006984//ER-nucleus signaling pathway
ncbi_106347845	LOC106347845	9.63	4.46	3.85	14.74	10.36	2.3	0.98	1.97	1.96	1.6367	9.1333	5.98	-0.610996003	0.995429267	0.998343095	-1.869384961	0.000231778	0.009590252	tubulin beta-2 chain [Camelina sativa]	ko04145//Phagosome	-	-	GO:0043623//cellular protein complex assembly
ncbi_106347861	LOC106347861	5.21	11.44	11.26	10.53	18.66	7.82	2.1	2.06	1.51	1.89	12.3367	9.3033	-0.407133011	0.795060646	0.984859178	-2.299361484	1.44E-06	0.000201736	nucleobase-ascorbate transporter 6 [Brassica rapa]	-	-	-	GO:0051234//establishment of localization
ncbi_106347883	BNAA01G11770D	0.42	0.28	0.15	0.28	0	0.44	1.65	2.13	0.88	1.5533	0.24	0.2833	0.239465935	0.683406028	0.984859178	2.454795209	0.000492657	0.016382649	BnaA01g11770D [Brassica napus]	-	-	-	-
ncbi_106347886	LOC106347886	2.14	2.85	3.35	2.84	4.5	1.76	1.29	1.1	1.13	1.1733	3.0333	2.78	-0.125819162	0.608967597	0.984859178	-1.244471955	0.001307785	0.031863489	proteinaceous RNase P 3 [Brassica rapa]	ko03013//Nucleocytoplasmic transport	-	-	GO:0016074//snoRNA metabolic process
ncbi_106347895	LOC106347895	0.97	4.82	6.77	0.6	0.92	0.57	0.64	0.59	3.89	1.7067	0.6967	4.1867	2.587261617	0.000153153	0.011060889	-1.294620749	0.22769834	0.63052851	BnaA01g11660D [Brassica napus]	-	-	-	GO:0044710//single-organism metabolic process
ncbi_106347913	LOC106347913	8.95	11.96	13.07	25.39	24.26	12.99	5.15	3.76	5.74	4.8833	20.88	11.3267	-0.88239836	0.308288565	0.905534499	-1.213785188	0.002296892	0.046944381	nuclear transcription factor Y subunit C-4 [Brassica rapa]	-	-	GO:0046983//protein dimerization activity	-
ncbi_106347916	LOC106347916	23.72	68.61	62.67	110.55	86.89	52.32	5.53	0.84	9.95	5.44	83.2533	51.6667	-0.688274227	0.832938664	0.984859178	-3.247555253	0.000168879	0.007593251	F-box/LRR-repeat protein At5g63520 [Brassica rapa]	-	-	-	-
ncbi_106347919	LOC106347919	4.76	8.23	6.14	13.1	11.28	8.36	0.61	0.39	0.59	0.53	10.9133	6.3767	-0.775217448	0.494051768	0.984859178	-3.588738203	6.64E-12	6.54E-09	BnaA06g39170D, partial [Brassica napus]	-	-	-	-
ncbi_106347931	LOC106347931	6.69	9.88	10.23	34.17	42.99	8.11	0.87	0.68	1.64	1.0633	28.4233	8.9333	-1.669805256	0.062842492	0.495102726	-3.070604672	1.04E-08	3.81E-06	BnaC03g50210D [Brassica napus]	ko01100//Metabolic pathways;ko00195//Photosynthesis	-	-	GO:0009767//photosynthetic electron transport chain
ncbi_106347951	LOC106347951	3.66	1.96	1.74	4.69	2.46	3.87	5.22	5.29	5.22	5.2433	3.6733	2.4533	-0.582346553	0.776446868	0.984859178	1.095740999	0.001489482	0.034992569	SAL1 phosphatase [Brassica rapa]	ko01100//Metabolic pathways;ko04070//Phosphatidylinositol signaling system;ko00562//Inositol phosphate metabolism;ko00920//Sulfur metabolism	-	GO:0052745//inositol phosphate phosphatase activity	-
ncbi_106347957	LOC106347957	2	3.87	3.29	14.24	16.63	2.75	0.57	0.26	0.77	0.5333	11.2067	3.0533	-1.875900221	0.057194842	0.471175458	-2.517275693	0.00020941	0.008921114	photosystem I reaction center subunit N, chloroplastic isoform X1 [Brassica rapa]	ko01100//Metabolic pathways;ko00195//Photosynthesis	-	-	GO:0009767//photosynthetic electron transport chain
ncbi_106347984	LOC106347984	0.42	0.08	0.03	0.13	0.27	0.08	2.88	1.18	0.86	1.64	0.16	0.1767	0.142957954	0.643301489	0.984859178	3.214594051	0.000681874	0.020535276	protein TRANSPARENT TESTA 12-like [Brassica rapa]	-	-	-	GO:0044763//single-organism cellular process
ncbi_106348009	LOC106348009	31.37	61.52	55.01	278.11	193.92	66.57	8.08	3.05	9.9	7.01	179.5333	49.3	-1.864592177	0.013691649	0.21854162	-2.814101297	1.47E-06	0.000204429	annexin D2 [Brassica rapa]	-	-	GO:0046872//metal ion binding	-
ncbi_106348011	LOC106348011	2.17	4.51	4.91	6.82	5.13	1.38	0.68	0.49	0.87	0.68	4.4433	3.8633	-0.201796214	0.44703198	0.979771144	-2.506239509	6.04E-06	0.000612799	asparagine synthetase [glutamine-hydrolyzing] 2 [Brassica rapa]	ko01100//Metabolic pathways;ko01110//Biosynthesis of secondary metabolites;ko00250//Alanine, aspartate and glutamate metabolism	GO:0044444//cytoplasmic part	-	-
ncbi_106348016	LOC106348016	2.12	3.81	3.86	8.92	7.39	2.16	0.83	0.34	0.57	0.58	6.1567	3.2633	-0.915803101	0.583376642	0.984859178	-2.492221554	1.08E-05	0.000957592	uncharacterized aarF domain-containing protein kinase At1g79600, chloroplastic [Brassica rapa]	-	-	GO:0016740//transferase activity	-
ncbi_106348020	LOC106348020	2.1	3.47	3.17	4.2	5.51	4.81	0.85	0.79	0.86	0.8333	4.84	2.9133	-0.732336268	0.595465738	0.984859178	-1.805705185	0.000810298	0.02306784	BnaA06g23800D [Brassica napus]	-	-	-	GO:0046474//glycerophospholipid biosynthetic process
ncbi_106348024	LOC106348024	6.21	6.75	8.16	21.32	20.6	11.27	2.48	3.82	2.79	3.03	17.73	7.04	-1.332545202	0.009341911	0.174388712	-1.216257635	0.001077353	0.027846072	BnaA06g23730D [Brassica napus]	-	GO:0043231//intracellular membrane-bounded organelle	-	-
ncbi_106348036	LOC106348036	1.89	2.42	2.91	6.38	6.15	2.04	0.74	0.36	0.98	0.6933	4.8567	2.4067	-1.012930135	0.355762809	0.937671811	-1.795415309	0.001310178	0.031911777	filaggrin-2 [Brassica rapa]	-	GO:0043231//intracellular membrane-bounded organelle	-	-
ncbi_106348061	LOC106348061	0.66	1.33	0.9	2.81	5.83	1.15	0.15	0.26	0.16	0.19	3.2633	0.9633	-1.760239367	0.059128647	0.480042256	-2.342035668	0.00014515	0.006734203	root phototropism protein 3 isoform X1 [Brassica rapa]	-	-	-	GO:0071555//cell wall organization
ncbi_106348084	LOC106348084	2	3.87	3.29	14.24	16.63	2.75	0.57	0.26	0.77	0.5333	11.2067	3.0533	-1.875900221	0.057194842	0.471175458	-2.517275693	0.00020941	0.008921114	photosystem I reaction center subunit N, chloroplastic isoform X1 [Brassica rapa]	ko01100//Metabolic pathways;ko00195//Photosynthesis	-	-	GO:0009767//photosynthetic electron transport chain
ncbi_106348091	LOC106348091	3.66	1.96	1.74	4.69	2.46	3.87	5.22	5.29	5.22	5.2433	3.6733	2.4533	-0.582346553	0.776446868	0.984859178	1.095740999	0.001489482	0.034992569	SAL1 phosphatase [Brassica rapa]	ko01100//Metabolic pathways;ko04070//Phosphatidylinositol signaling system;ko00562//Inositol phosphate metabolism;ko00920//Sulfur metabolism	-	GO:0052745//inositol phosphate phosphatase activity	-
ncbi_106348125	LOC106348125	296.13	136.36	130.43	118.71	71.11	236.32	386.28	558.02	413.45	452.5833	142.0467	187.64	0.401602429	0.281103367	0.882187421	1.270216051	0.000343056	0.012640558	BnaC09g48550D [Brassica napus]	-	-	-	GO:0044267//cellular protein metabolic process
ncbi_106348147	LOC106348147	5.76	8.17	7.44	16.87	12.82	11.24	2.66	2.23	3.26	2.7167	13.6433	7.1233	-0.937571759	0.150743494	0.714718477	-1.390714944	0.000145135	0.006734203	beta-galactosidase 6 [Brassica rapa]	-	-	-	GO:0044238//primary metabolic process
ncbi_106348169	LOC106348169	18.78	11.97	12.61	15.17	14.14	10.98	24.58	48.66	23.78	32.34	13.43	14.4533	0.105942951	0.01982977	0.271060082	1.161917423	0.001121934	0.028627172	ruvB-like 2 [Brassica rapa]	-	-	-	GO:0051603//proteolysis involved in cellular protein catabolic process
ncbi_106348184	LOC106348184	98.47	59.05	54.21	61.96	54.79	83.15	140.77	188.28	128.88	152.6433	66.6333	70.5767	0.082947227	0.281410851	0.882594536	1.112901383	8.97E-05	0.004675825	2-oxoglutarate dehydrogenase, mitochondrial [Brassica rapa]	ko01100//Metabolic pathways;ko01110//Biosynthesis of secondary metabolites;ko01200//Carbon metabolism;ko00380//Tryptophan metabolism;ko00020//Citrate cycle (TCA cycle);ko00310//Lysine degradation	-	GO:0046914//transition metal ion binding	-
ncbi_106348199	LOC106348199	1.35	6.64	6.17	6.27	6.54	1.32	0.9	0.41	0.58	0.63	4.71	4.72	0.0030598	0.383054312	0.956342462	-2.905363126	0.00012762	0.006113426	BnaC06g43510D [Brassica napus]	ko01100//Metabolic pathways;ko00500//Starch and sucrose metabolism;ko00520//Amino sugar and nucleotide sugar metabolism;ko00051//Fructose and mannose metabolism	-	-	GO:0019321//pentose metabolic process
ncbi_106348220	LOC106348220	3.9	4.32	4.53	4.94	5.03	1.63	1.6	0.99	2.07	1.5533	3.8667	4.25	0.136372442	0.087365489	0.573170866	-1.452095387	0.00167878	0.037809988	BnaA06g25630D [Brassica napus]	ko01100//Metabolic pathways;ko00330//Arginine and proline metabolism	-	-	GO:0048468//cell development
ncbi_106348226	LOC106348226	4.15	5.41	4.58	4.56	3.19	4.31	8.67	13.75	10.45	10.9567	4.02	4.7133	0.229552213	0.068746348	0.515365192	1.216989336	4.49E-05	0.002806279	BnaA06g25550D [Brassica napus]	ko04144//Endocytosis	GO:0044424//intracellular part	-	-
ncbi_106348230	LOC106348230	5.77	8.91	12.6	14.05	6.25	6.52	0.08	0.16	0.68	0.3067	8.94	9.0933	0.024534407	0.21520229	0.817248727	-4.890065973	2.90E-09	1.24E-06	rhodanese-like domain-containing protein 17 [Brassica rapa]	-	-	GO:0016740//transferase activity	-
ncbi_106348260	LOC106348260	8.36	5.19	3.96	22.29	22.98	19.13	16.56	36.43	3.77	18.92	21.4667	5.8367	-1.878881605	5.33E-05	0.00508942	1.696695506	0.019206654	0.174977704	BnaA01g01570D [Brassica napus]	-	-	-	GO:0043207//response to external biotic stimulus
ncbi_106348301	LOC106348301	1.73	1.16	1.29	8.16	6.19	5.05	1.07	0.46	0.97	0.8333	6.4667	1.3933	-2.214481805	2.16E-09	1.77E-06	-0.741574847	0.212281909	0.610594289	protein notum homolog isoform X1 [Brassica rapa]	-	GO:0005618//cell wall	-	-
ncbi_106348304	LOC106348304	5.53	7.43	5.55	2.4	2.88	3.29	7.29	9.88	8.25	8.4733	2.8567	6.17	1.110937786	0.000256198	0.016020783	0.457659135	0.087267968	0.39465949	BnaC07g30560D [Brassica napus]	-	GO:0043231//intracellular membrane-bounded organelle	-	-
ncbi_106348307	LOC106348307	2.99	2.76	2.7	11.87	8.16	8.72	2.96	4.43	2.63	3.34	9.5833	2.8167	-1.76653871	4.48E-05	0.004476368	0.245859262	0.432615878	0.826628162	remorin-like [Brassica rapa]	-	-	-	GO:0044085//cellular component biogenesis
ncbi_106348329	LOC106348329	0	0	0	0	0.58	0.17	0.56	0.76	0.25	0.5233	0.25	0	-7.965784285	0.043026779	0.408073481	9.031586343	2.70E-06	0.000332734	BnaC03g74680D [Brassica napus]	-	-	GO:0016746//transferase activity, transferring acyl groups	-
ncbi_106348354	LOC106348354	4.24	8.61	8.49	12.98	8.52	4.23	1.18	0.34	1.68	1.0667	8.5767	7.1133	-0.269891281	0.460420343	0.980197221	-2.737416366	6.39E-05	0.003646286	BnaC03g50750D [Brassica napus]	-	-	-	-
ncbi_106348371	LOC106348371	18.24	8.36	6.74	6.85	6.66	3.83	115.26	85.25	149.22	116.5767	5.78	11.1133	0.943150206	0.001113289	0.043827991	3.390915547	3.07E-14	5.31E-11	BnaA04g17910D [Brassica napus]	ko00480//Glutathione metabolism	-	GO:0097159//organic cyclic compound binding	-
ncbi_106348392	LOC106348392	1.45	0.82	0.4	1.92	3.29	4	6.19	8.8	1.06	5.35	3.07	0.89	-1.786361414	0.038998067	0.388149754	2.58766165	0.001339422	0.03241084	BnaA04g17640D [Brassica napus]	-	-	-	-
ncbi_106348393	LOC106348393	3.68	4.02	3.47	14.74	36.16	8.83	1.68	0.72	1.26	1.22	19.91	3.7233	-2.418826536	0.000756467	0.034194404	-1.609713632	0.002935311	0.055404611	BnaA04g17660D [Brassica napus]	ko01100//Metabolic pathways;ko00195//Photosynthesis	-	-	GO:0042548//regulation of photosynthesis, light reaction
ncbi_106348427	LOC106348427	7.05	4.94	5.12	11.4	10.85	5.09	2.67	2.76	2.11	2.5133	9.1133	5.7033	-0.676173483	0.656964948	0.984859178	-1.182203331	0.000122973	0.005957121	BnaC07g29850D [Brassica napus]	-	-	-	GO:0051276//chromosome organization
ncbi_106348502	LOC106348502	10.92	7.02	6.24	49.02	39.43	24.67	8.39	11.29	11.43	10.37	37.7067	8.06	-2.225967876	3.35E-09	2.67E-06	0.36356415	0.179290842	0.563551065	BnaA01g01550D [Brassica napus]	-	-	-	GO:0050896//response to stimulus
ncbi_106348527	LOC106348527	0.15	0.41	0.45	0.58	1.03	0.39	0	0	0	0	0.6667	0.3367	-0.985644707	0.603951013	0.984859178	-8.395177077	0.001446942	0.034307829	probable glycosyltransferase At5g25310 isoform X2 [Brassica rapa]	-	-	GO:0016740//transferase activity	-
ncbi_106348560	LOC106348560	3.87	1.26	1.33	2.23	5.14	8.69	8	11.41	7.59	9	5.3533	2.1533	-1.313865823	0.17682369	0.761262321	2.063353337	1.92E-05	0.00147723	BnaA06g28030D [Brassica napus]	-	GO:0043231//intracellular membrane-bounded organelle	-	-
ncbi_106348569	LOC106348569	0.98	1	2.09	1.78	2.08	0.3	0.1	0.07	0.03	0.0667	1.3867	1.3567	-0.031554734	0.416804455	0.96855741	-4.346956889	2.24E-06	0.000286033	solute carrier family 25 member 44-like [Brassica rapa]	-	-	-	GO:1902582//single-organism intracellular transport
ncbi_106348585	LOC106348585	1.09	2.31	1.8	3.31	5.96	0.75	0	0.12	0.1	0.0733	3.34	1.7333	-0.94629898	0.659583855	0.984859178	-4.562936194	1.64E-07	3.61E-05	protein notum homolog [Brassica rapa]	-	-	-	GO:0044085//cellular component biogenesis
ncbi_106348604	BNAC07G14470D	0.89	2.04	2.42	8.59	9.66	2.2	0.14	0	0.14	0.0933	6.8167	1.7833	-1.934490047	0.050181782	0.442489792	-4.256040159	0.000157645	0.007175881	BnaC07g14470D [Brassica napus]	-	GO:0031976//plastid thylakoid	-	-
ncbi_106348614	LOC106348614	0.13	0.25	0.8	0.01	0.47	0.74	2.01	2.35	1.19	1.85	0.4067	0.3933	-0.048094288	0.909786982	0.984859178	2.233700912	0.002511875	0.049831782	zinc finger BED domain-containing protein RICESLEEPER 2-like [Brassica rapa]	-	-	GO:0005488//binding	-
ncbi_106348633	LOC106348633	0	2.64	2.6	0.02	0	0.02	0	0	0	0	0.0133	1.7467	7.033423002	3.80E-05	0.003955918	-10.7703886	0.02137162	0.185651322	BnaA05g17040D [Brassica napus]	-	-	GO:0003676//nucleic acid binding	-
ncbi_106348714	LOC106348714	4.83	3.87	4.53	13.74	11.08	7.85	2.49	3.28	3.18	2.9833	10.89	4.41	-1.304153393	0.000325859	0.019041624	-0.563853474	0.052820675	0.304196225	BnaC07g28590D [Brassica napus]	-	-	-	GO:0048507//meristem development
ncbi_106348719	LOC106348719	1.97	4.39	3.07	5.97	9.13	1.68	0.27	0.12	0.43	0.2733	5.5933	3.1433	-0.83141304	0.720108638	0.984859178	-3.523561956	1.83E-07	3.97E-05	BnaC07g28690D [Brassica napus]	-	-	-	GO:0044085//cellular component biogenesis
ncbi_106348725	LOC106348725	0.67	1.48	2.83	1.18	1.3	1.51	0.01	0	0.06	0.0233	1.33	1.66	0.319756996	0.27882621	0.87990379	-6.15264701	2.18E-05	0.001637349	BnaC07g28790D [Brassica napus]	-	-	-	-
ncbi_106348734	LOC106348734	1.51	0.91	0.83	3.55	1.56	0.1	0.03	0.04	0.17	0.08	1.7367	1.0833	-0.680843654	0.987453198	0.996165072	-3.759333407	3.03E-05	0.002092567	solute carrier family 25 member 44-like [Brassica rapa]	-	-	-	GO:1902582//single-organism intracellular transport
ncbi_106348757	LOC106348757	7.34	11.16	10.02	39.07	53.78	6.75	0.25	0.18	0.56	0.33	33.2	9.5067	-1.804171761	0.068249214	0.513892282	-4.848401646	2.35E-18	8.71E-15	BnaC07g28940D [Brassica napus]	-	-	-	-
ncbi_106348771	LOC106348771	2.03	3.65	3.31	2.44	3.86	0.34	0.96	0.17	0.55	0.56	2.2133	2.9967	0.437137874	0.158686426	0.728874557	-2.419859883	0.000956214	0.025708277	BnaC02g47920D [Brassica napus]	-	-	-	GO:0071555//cell wall organization
ncbi_106348775	LOC106348775	14.16	31.76	31.1	25.44	42.77	13.89	6.14	2.67	10.72	6.51	27.3667	25.6733	-0.092149099	0.367888819	0.947194993	-1.979541174	0.002387131	0.048093357	BnaA01g29500D [Brassica napus]	-	-	-	GO:0044238//primary metabolic process
ncbi_106348811	LOC106348811	0.69	2.38	2.59	1.85	4.59	0.96	0.07	0.16	0.19	0.14	2.4667	1.8867	-0.386723218	0.795914605	0.984859178	-3.75234082	2.57E-05	0.001849294	transcription factor MYB12-like [Brassica rapa]	ko04626//Plant-pathogen interaction	-	-	GO:0051553//flavone biosynthetic process
ncbi_106348814	LOC106348814	1.8	1.09	0.73	9.82	8.41	0.5	0	0	0.07	0.0233	6.2433	1.2067	-2.371289297	0.042886633	0.407050907	-5.692490965	1.94E-07	4.14E-05	BnaA10g07760D [Brassica napus]	-	-	-	GO:0051301//cell division
ncbi_106348815	LOC106348815	1.64	0.73	0.99	1.73	1.46	1.98	2.95	6.45	2.68	4.0267	1.7233	1.12	-0.621703048	0.705176691	0.984859178	1.846087317	0.000225199	0.00939806	BnaA10g07780D [Brassica napus]	-	-	-	GO:0016485//protein processing
ncbi_106348818	LOC106348818	0	0	0	1.24	0.17	0.07	0	0	0.05	0.0167	0.4933	0	-8.94641896	0.000839129	0.036339229	4.058893689	0.534901459	0.884565953	65-kDa microtubule-associated protein 3-like [Brassica rapa]	-	-	-	GO:1902410//mitotic cytokinetic process
ncbi_106348872	LOC106348872	0.69	2.38	2.59	1.85	4.59	0.96	0.07	0.16	0.19	0.14	2.4667	1.8867	-0.386723218	0.795914605	0.984859178	-3.75234082	2.57E-05	0.001849294	transcription factor MYB12-like [Brassica rapa]	ko04626//Plant-pathogen interaction	-	-	GO:0051553//flavone biosynthetic process
ncbi_106348876	LOC106348876	202.52	440.09	419.62	584.03	612.57	181.24	32.44	7.55	64.68	34.89	459.28	354.0767	-0.375312186	0.638683526	0.984859178	-3.343176272	1.58E-05	0.00129183	sucrose synthase 2 [Brassica rapa]	ko01100//Metabolic pathways;ko00500//Starch and sucrose metabolism	-	-	GO:1902410//mitotic cytokinetic process
ncbi_106348899	LOC106348899	31.95	36.89	32.58	64.33	64.56	26.12	13.02	12.24	14.71	13.3233	51.67	33.8067	-0.61201911	0.900741841	0.984859178	-1.343352702	8.71E-07	0.000136806	BnaA06g29960D [Brassica napus]	-	-	GO:0046906//tetrapyrrole binding	-
ncbi_106348917	LOC106348917	4.86	7	7.06	13.41	11.71	2.82	2.72	1.39	2.47	2.1933	9.3133	6.3067	-0.562419932	0.89082626	0.984859178	-1.5237526	0.00098933	0.026298992	BnaC07g39050D [Brassica napus]	ko01100//Metabolic pathways;ko01110//Biosynthesis of secondary metabolites;ko01200//Carbon metabolism;ko00500//Starch and sucrose metabolism;ko00520//Amino sugar and nucleotide sugar metabolism;ko00010//Glycolysis / Gluconeogenesis;ko00030//Pentose phosphate pathway	-	-	GO:0071555//cell wall organization
ncbi_106348939	LOC106348939	8.62	16.03	15.8	56.34	24.03	15.02	1.91	1.1	2.64	1.8833	31.7967	13.4833	-1.23769833	0.22536072	0.828483648	-2.83981693	8.53E-08	2.11E-05	BnaC07g38840D [Brassica napus]	-	-	-	GO:0044267//cellular protein metabolic process
ncbi_106348943	LOC106348943	2.3	2.29	2.42	10.6	6.33	1.81	0.48	0.37	1.02	0.6233	6.2467	2.3367	-1.418634604	0.135372132	0.687826582	-1.906376174	0.00025834	0.010318271	BnaC01g16050D [Brassica napus]	ko04626//Plant-pathogen interaction;ko04141//Protein processing in endoplasmic reticulum	GO:0044437//vacuolar part	-	-
ncbi_106348966	LOC106348966	0.23	0.31	0.31	0.1	0.08	0.07	0.11	0.14	0.07	0.1067	0.0833	0.2833	1.765534746	0.000310155	0.018412471	-1.409390936	0.034581092	0.242684183	BnaA06g30450D [Brassica napus]	-	GO:0043231//intracellular membrane-bounded organelle	-	-
ncbi_106348980	LOC106348980	3.15	2.12	1.82	2.91	3.04	2.83	5.39	7.47	4.27	5.71	2.9267	2.3633	-0.308435312	0.69754892	0.984859178	1.272667619	0.000262272	0.010430123	BnaCnng59970D [Brassica napus]	-	-	-	-
ncbi_106348984	LOC106348984	0.47	0.48	0.51	6.65	9.31	0.52	0.07	0.18	0.12	0.1233	5.4933	0.4867	-3.496675968	0.000566144	0.027880063	-1.980371193	0.001919337	0.041496854	BnaC07g26440D [Brassica napus]	-	-	-	-
ncbi_106348990	LOC106348990	5.4	7.97	9.54	26.74	31.34	6.71	2.06	1.16	2.36	1.86	21.5967	7.6367	-1.499793699	0.112730062	0.6413478	-2.037640431	9.12E-05	0.0047382	BnaC07g26500D [Brassica napus]	-	GO:0044444//cytoplasmic part	-	-
ncbi_106349027	LOC106349027	0.17	0.72	0.87	0.71	1.56	0.28	0.06	0.1	0.06	0.0733	0.85	0.5867	-0.534921818	0.959722385	0.992527369	-3	0.00088922	0.024498295	BnaC04g21810D [Brassica napus]	-	-	-	-
ncbi_106349037	LOC106349037	1.4	4.02	3.7	0.08	0.12	0.39	1.78	1.08	4.54	2.4667	0.1967	3.04	3.950246965	1.32E-06	0.00027756	-0.301508554	0.710730293	0.931552167	BnaA03g41160D [Brassica napus]	-	-	GO:0046914//transition metal ion binding	-
ncbi_106349057	LOC106349057	1.98	3.97	3.56	21.29	13.24	3.4	0.97	1.42	1.2	1.1967	12.6433	3.17	-1.995822125	0.025085179	0.307127796	-1.405461497	0.001525324	0.035559023	probably inactive leucine-rich repeat receptor-like protein kinase IMK2 [Brassica rapa]	-	-	-	GO:0044710//single-organism metabolic process
ncbi_106349060	LOC106349060	88.86	23.62	18.77	10.89	4.7	29.04	146.56	182.38	167.39	165.4433	14.8767	43.75	1.556231711	0.045336403	0.418462591	1.918982236	0.00055654	0.017798985	BnaC01g23250D [Brassica napus]	-	-	-	GO:0048507//meristem development
ncbi_106349062	LOC106349062	20.8	25.78	20.51	197.84	299.05	30.82	1.07	0.66	1.46	1.0633	175.9033	22.3633	-2.975575674	0.000398264	0.021653266	-4.394469415	9.16E-26	1.76E-21	36.4 kDa proline-rich protein [Brassica rapa]	-	-	GO:0005488//binding	-
ncbi_106349077	LOC106349077	12.6	21.69	20.13	73.85	90.02	21.51	2.05	1.89	5.29	3.0767	61.7933	18.14	-1.768276743	0.024786398	0.304788741	-2.559734404	6.55E-06	0.000654471	BnaC09g21870D [Brassica napus]	ko01100//Metabolic pathways;ko00195//Photosynthesis	-	GO:0046872//metal ion binding	-
ncbi_106349078	LOC106349078	0.26	0.22	0.16	4.9	1.14	0.45	0.02	0.09	0.05	0.0533	2.1633	0.2133	-3.342074668	0.001048405	0.042225954	-2	0.036465707	0.249876552	BnaC09g21860D [Brassica napus]	-	-	-	GO:1902410//mitotic cytokinetic process
ncbi_106349092	LOC106349092	16.15	36.6	36.66	40.17	34.12	9.13	8.39	8.69	8.89	8.6567	27.8067	29.8033	0.100042885	0.186863713	0.775500005	-1.783590184	7.88E-05	0.004244283	bifunctional enolase 2/transcriptional activator-like [Brassica rapa]	ko01100//Metabolic pathways;ko01110//Biosynthesis of secondary metabolites;ko01200//Carbon metabolism;ko01230//Biosynthesis of amino acids;ko03018//RNA degradation;ko00010//Glycolysis / Gluconeogenesis	-	GO:0046914//transition metal ion binding	-
ncbi_106349111	LOC106349111	3.16	3.4	2.44	10.7	5.24	2.07	1.28	0.97	1.52	1.2567	6.0033	3	-1.000801275	0.463449853	0.98158061	-1.255360478	0.002203431	0.045719283	COBRA-like protein 2 [Brassica rapa]	-	GO:0043231//intracellular membrane-bounded organelle	-	-
ncbi_106349116	LOC106349116	2.21	3.22	2.82	9.8	10.63	1.08	0.5	0.15	0.86	0.5033	7.17	2.75	-1.3825415	0.296089636	0.896079787	-2.44984557	0.00033095	0.012368249	alpha-glucan phosphorylase 1 [Brassica rapa]	ko01100//Metabolic pathways;ko01110//Biosynthesis of secondary metabolites;ko00500//Starch and sucrose metabolism	-	-	GO:0044238//primary metabolic process
ncbi_106349146	LOC106349146	1.21	0.38	0.07	1.77	0.5	0.99	2.98	5.69	3.03	3.9	1.0867	0.5533	-0.973688723	0.62557255	0.984859178	2.817253383	0.000741898	0.021827333	BnaA06g31160D [Brassica napus]	-	-	-	GO:0051707//response to other organism
ncbi_106349152	LOC106349152	1.1	0.62	0.79	1.42	1.06	0.71	1.73	3.04	1.52	2.0967	1.0633	0.8367	-0.34586906	0.585748713	0.984859178	1.325372653	0.000435875	0.014908914	thyroid adenoma-associated protein homolog [Brassica rapa]	-	-	-	-
ncbi_106349169	LOC106349169	11.1	15.91	16.96	66.92	67.56	19.42	4.24	2.63	5.29	4.0533	51.3	14.6567	-1.807401794	0.009436548	0.175198614	-1.854376304	5.61E-05	0.00330077	photosystem I reaction center subunit III, chloroplastic [Brassica rapa]	ko01100//Metabolic pathways;ko00195//Photosynthesis	GO:0009570//chloroplast stroma	-	-
ncbi_106349180	LOC106349180	3.56	7.32	6.46	10.47	12.54	2.4	0.73	0.29	1.28	0.7667	8.47	5.78	-0.551292477	0.898009835	0.984859178	-2.914398132	1.01E-05	0.000915489	BnaA09g25420D [Brassica napus]	ko01100//Metabolic pathways;ko00520//Amino sugar and nucleotide sugar metabolism	-	GO:0070569//uridylyltransferase activity	-
ncbi_106349237	LOC106349237	0.36	0.43	0.53	11.95	5.58	0.48	0	0	0.15	0.05	6.0033	0.44	-3.770188347	0.001128995	0.044318728	-3.137503524	0.039927011	0.261701968	BnaA06g31910D [Brassica napus]	ko01100//Metabolic pathways;ko00196//Photosynthesis - antenna proteins	-	GO:0046906//tetrapyrrole binding	-
ncbi_106349272	LOC106349272	1.01	2.94	3.37	5.67	3.85	0.4	0.34	0.11	0.16	0.2033	3.3067	2.44	-0.438496472	0.752432077	0.984859178	-3.584962501	5.47E-05	0.003250335	mavicyanin [Brassica rapa]	-	-	GO:0046914//transition metal ion binding	-
ncbi_106349276	LOC106349276	0.93	1.43	1.42	1.53	1.78	0.78	0.38	0.04	0.2	0.2067	1.3633	1.26	-0.113714609	0.307759907	0.905076436	-2.608046114	0.00177353	0.039239231	BnaA01g29180D [Brassica napus]	ko00520//Amino sugar and nucleotide sugar metabolism	-	GO:0048037//cofactor binding	-
ncbi_106349325	LOC106349325	6.95	7.35	8.06	42.75	39.86	10.98	1.75	0.97	1.73	1.4833	31.1967	7.4533	-2.065434199	0.001135972	0.044430369	-2.329042947	1.94E-08	6.05E-06	LOW QUALITY PROTEIN: glyceraldehyde-3-phosphate dehydrogenase GAPA1, chloroplastic [Brassica rapa]	ko01100//Metabolic pathways;ko01200//Carbon metabolism;ko00710//Carbon fixation in photosynthetic organisms	-	-	GO:0034285//response to disaccharide
ncbi_106349327	LOC106349327	4.25	1.71	1.55	2.45	0.84	2.79	5.82	11.08	5.73	7.5433	2.0267	2.5033	0.304741584	0.33029377	0.920071983	1.591351772	0.001085392	0.027988704	BnaC03g38840D [Brassica napus]	-	GO:0044444//cytoplasmic part	-	-
ncbi_106349343	LOC106349343	0.65	0.58	0.94	1.18	2.01	1.64	0.08	0.04	0.15	0.09	1.61	0.7233	-1.154328146	0.217577712	0.820723137	-3.00666373	0.001179079	0.029589999	BnaC07g23520D [Brassica napus]	-	-	-	-
ncbi_106349371	LOC106349371	0.19	0.7	0.81	0.07	0.05	0.02	0	0.07	0.12	0.0633	0.0467	0.5667	3.602036014	8.21E-06	0.001173935	-3.161463423	0.005110438	0.079142667	BnaCnng38990D [Brassica napus]	-	-	GO:0001071//nucleic acid binding transcription factor activity	-
ncbi_106349372	LOC106349372	0.35	15.52	14.75	0.47	0.48	0.34	0.23	0.33	15.87	5.4767	0.43	10.2067	4.569031312	2.66E-06	0.000483355	-0.898141803	1	1	BnaCnng39010D [Brassica napus]	ko03050//Proteasome	-	-	GO:0090567//reproductive shoot system development
ncbi_106349374	LOC106349374	0.41	4.44	3.59	0.22	0.51	0.08	0.31	0.64	5.31	2.0867	0.27	2.8133	3.381249186	0.000326847	0.019061848	-0.431080342	0.722321679	0.931552167	BnaCnng39040D [Brassica napus]	-	GO:0043234//protein complex	-	-
ncbi_106349397	LOC106349397	1.57	1.01	1.17	0.23	0.47	0.35	0.89	0.25	0.38	0.5067	0.35	1.25	1.836501268	3.30E-05	0.00354684	-1.302819272	0.068026969	0.347412978	BnaA06g33460D [Brassica napus]	-	-	-	GO:0048437//floral organ development
ncbi_106349413	BNAA06G33290D	2.3	2.3	1.89	4.15	4.34	3.16	3.79	7.34	3.9	5.01	3.8833	2.1633	-0.844039572	0.288237402	0.888489996	1.211554626	0.002022864	0.042970388	BnaC07g23050D [Brassica napus]	-	GO:0043231//intracellular membrane-bounded organelle	-	-
ncbi_106349423	LOC106349423	2.37	3.2	3.88	2.86	4.95	5.73	7.62	11.91	6.78	8.77	4.5133	3.15	-0.518841504	0.83755932	0.984859178	1.477225014	0.000103822	0.005227898	BnaA06g33190D [Brassica napus]	-	-	-	-
ncbi_106349433	LOC106349433	2.02	0.63	0.58	0.63	1.44	13.33	18.45	35.79	12.72	22.32	5.1333	1.0767	-2.253324281	0.068446228	0.514836146	4.373693458	2.01E-13	2.95E-10	cytochrome P450 71B17-like [Brassica rapa]	-	-	GO:0046914//transition metal ion binding	-
ncbi_106349446	LOC106349446	2.14	7.62	6.61	8.04	16.11	1.81	0.48	0.1	0.98	0.52	8.6533	5.4567	-0.665236062	0.966581613	0.993869092	-3.391436388	9.13E-05	0.004739027	BnaA06g35070D [Brassica napus]	-	-	-	GO:0048447//sepal morphogenesis
ncbi_106349476	LOC106349476	3.96	4.83	4.54	5.65	6.4	1.85	1.16	0.75	1.76	1.2233	4.6333	4.4433	-0.060408103	0.266902555	0.867561034	-1.860824812	0.000352857	0.012909902	peptidyl-prolyl cis-trans isomerase CYP18-3-like [Brassica rapa]	-	-	-	GO:0048511//rhythmic process
ncbi_106349478	LOC106349478	3.96	4.83	4.54	5.65	6.4	1.85	1.16	0.75	1.76	1.2233	4.6333	4.4433	-0.060408103	0.266902555	0.867561034	-1.860824812	0.000352857	0.012909902	peptidyl-prolyl cis-trans isomerase CYP18-3-like [Brassica rapa]	-	-	-	GO:0048511//rhythmic process
ncbi_106349490	LOC106349490	30.61	32.48	30.46	100.74	104.21	36.26	8.44	6.81	10.47	8.5733	80.4033	31.1833	-1.366480161	0.02648241	0.316935659	-1.862847011	1.21E-09	6.23E-07	probable fructose-bisphosphate aldolase 2, chloroplastic [Brassica rapa]	ko01100//Metabolic pathways;ko01110//Biosynthesis of secondary metabolites;ko01200//Carbon metabolism;ko01230//Biosynthesis of amino acids;ko00010//Glycolysis / Gluconeogenesis;ko00710//Carbon fixation in photosynthetic organisms;ko00051//Fructose and mannose metabolism;ko00030//Pentose phosphate pathway	-	-	GO:0048869//cellular developmental process
ncbi_106349498	LOC106349498	0.86	0.59	0.5	0.62	0.4	1.07	1.49	2.42	1.57	1.8267	0.6967	0.65	-0.100028818	0.716788656	0.984859178	1.490701769	0.001249119	0.030796872	ribosome biogenesis protein BRX1-like [Brassica rapa]	-	GO:0044444//cytoplasmic part	-	-
ncbi_106349502	LOC106349502	1.03	0.25	0.16	12.83	3.66	1.96	0.11	0.39	0.48	0.3267	6.15	0.48	-3.6794801	0.000497392	0.025298446	-0.555215157	0.670316728	0.916282208	BnaA01g28900D [Brassica napus]	-	-	-	GO:0034285//response to disaccharide
ncbi_106349507	LOC106349507	1.13	0.78	1.03	2.59	2.13	0.1	0.24	0.08	0.29	0.2033	1.6067	0.98	-0.713216991	0.95580936	0.991799364	-2.268935007	0.001007525	0.026589282	glucose-1-phosphate adenylyltransferase large subunit 3, chloroplastic isoform X1 [Brassica rapa]	ko01100//Metabolic pathways;ko01110//Biosynthesis of secondary metabolites;ko00500//Starch and sucrose metabolism;ko00520//Amino sugar and nucleotide sugar metabolism	-	GO:0070566//adenylyltransferase activity	-
ncbi_106349511	LOC106349511	2.93	0.27	0.14	0.58	0.58	0.21	0	0	0	0	0.4567	1.1133	1.28567221	0.124003863	0.66529224	-10.12066989	0.000191998	0.008316041	probable cinnamyl alcohol dehydrogenase 9 [Brassica rapa]	ko01100//Metabolic pathways;ko01110//Biosynthesis of secondary metabolites;ko00940//Phenylpropanoid biosynthesis	-	GO:0046914//transition metal ion binding	-
ncbi_106349513	LOC106349513	1.06	1.1	0.89	1.45	0.74	0.9	2.01	2.38	3.32	2.57	1.03	1.0167	-0.018797595	0.188662065	0.778591641	1.337921617	5.28E-05	0.003169426	brassinosteroid-insensitive 1 protein [Brassica napus]	ko04075//Plant hormone signal transduction	-	-	GO:0055088//lipid homeostasis
ncbi_106349593	LOC106349593	4.39	8.01	7.65	15.06	22.5	4.06	2.04	0.68	2.15	1.6233	13.8733	6.6833	-1.053674728	0.454535568	0.979771144	-2.041608559	0.000647472	0.019725325	probable LRR receptor-like serine/threonine-protein kinase At4g36180 [Brassica rapa]	-	-	GO:0032550//purine ribonucleoside binding	-
ncbi_106349631	LOC106349631	0.23	0.26	0.23	0.1	0.02	0.03	0.24	0.14	0.4	0.26	0.05	0.24	2.263034406	0.000472492	0.024371933	0.115477217	0.787601844	0.931552167	BnaA05g33070D [Brassica napus]	-	-	-	-
ncbi_106349653	LOC106349653	17.96	5.34	5.38	12.37	5.85	8.94	27.31	34.6	22.77	28.2267	9.0533	9.56	0.078561544	0.330049807	0.919785835	1.561976245	0.001874585	0.040835918	phospholipase D alpha 2 [Brassica rapa]	ko01100//Metabolic pathways;ko01110//Biosynthesis of secondary metabolites;ko04144//Endocytosis;ko00564//Glycerophospholipid metabolism;ko00565//Ether lipid metabolism	-	GO:1902936//phosphatidylinositol bisphosphate binding	-
ncbi_106349699	LOC106349699	0	0	0	0.05	0.23	0	0.19	0.4	0.27	0.2867	0.0933	0	-6.544320516	0.28504772	0.885767353	8.163230349	0.000227899	0.009486454	BnaC06g03000D [Brassica napus]	-	-	GO:0034061//DNA polymerase activity	-
ncbi_106349745	LOC106349745	0.04	0.03	0.01	1.12	0.2	0.16	0.06	0.03	0.03	0.04	0.4933	0.0267	-4.209453366	0.000215903	0.014249633	0.584962501	0.568305491	0.892859536	acetyl-CoA carboxylase [Brassica napus]	ko01100//Metabolic pathways;ko01110//Biosynthesis of secondary metabolites;ko00620//Pyruvate metabolism;ko01212//Fatty acid metabolism;ko00061//Fatty acid biosynthesis;ko00640//Propanoate metabolism	-	-	GO:0048507//meristem development
ncbi_106349766	LOC106349766	8.49	17.67	15.84	13.85	14.65	10.48	5.22	1.85	5.06	4.0433	12.9933	14	0.107655237	0.12332269	0.663851681	-1.791809777	0.002518073	0.04989108	probable sulfate transporter 3.4 [Brassica rapa]	-	-	-	GO:0044763//single-organism cellular process
ncbi_106349930	LOC106349930	25.15	10.34	9.95	8.96	5.91	21.19	44.14	61.61	32.62	46.1233	12.02	15.1467	0.333563438	0.403266832	0.961297488	1.606496446	0.000287036	0.011152529	BnaC02g16130D [Brassica napus]	-	GO:0043231//intracellular membrane-bounded organelle	-	-
ncbi_106350062	LOC106350062	7.24	1.84	1.95	18.12	2.65	1.24	0.93	0.66	0.9	0.83	7.3367	3.6767	-0.996726354	0.725894826	0.984859178	-2.147215144	0.001168169	0.029438779	protein STRUBBELIG [Brassica rapa]	-	-	-	GO:0048827//phyllome development
ncbi_106350238	LOC106350238	2.14	1.11	1.48	3.29	2.25	2.85	2.92	4.42	2.68	3.34	2.7967	1.5767	-0.826830627	0.315630842	0.909969152	1.08297042	0.000862975	0.023996321	BnaA01g21250D [Brassica napus]	-	-	-	-
ncbi_106350468	LOC106350468	0.67	0.95	1.07	3.72	8.26	1.03	0.12	0.04	0.24	0.1333	4.3367	0.8967	-2.273942884	0.024677171	0.304156835	-2.749534268	0.001885743	0.041055972	BnaC05g07910D [Brassica napus]	-	-	GO:0001871//pattern binding	-
ncbi_106350482	LOC106350482	78.11	154.97	143.09	509.87	439.27	151.73	14.79	4.36	27.19	15.4467	366.9567	125.39	-1.549187411	0.049501288	0.438720341	-3.021054848	1.85E-05	0.001436934	BnaC05g07900D [Brassica napus]	ko00480//Glutathione metabolism	-	-	GO:0048585//negative regulation of response to stimulus
ncbi_106350553	LOC106350553	5.35	7.79	6.88	15.29	17.38	7.3	1.9	0.44	1.49	1.2767	13.3233	6.6733	-0.997475599	0.249939957	0.851068713	-2.386025677	0.000275413	0.010803509	BnaC05g07550D [Brassica napus]	-	-	GO:0046914//transition metal ion binding	-
ncbi_106350610	LOC106350610	0.05	0.01	0.04	1.27	0.57	0.2	0	0	0.02	0.0067	0.68	0.0333	-4.350497247	3.36E-05	0.003579714	-2.321928095	0.357698901	0.769800784	F15O4.13 [Arabidopsis thaliana]	-	GO:0043231//intracellular membrane-bounded organelle	-	-
ncbi_106350684	LOC106350684	1.3	3.23	2.61	7.95	7.47	1.73	0.16	0.11	0.24	0.17	5.7167	2.38	-1.264212597	0.313918715	0.909357853	-3.807354922	9.57E-08	2.30E-05	BnaC06g00800D [Brassica napus]	-	-	-	GO:0055081//anion homeostasis
ncbi_106350854	LOC106350854	13.09	15.06	13.73	42.18	46.3	10.05	5.05	3.11	3.69	3.95	32.8433	13.96	-1.234301615	0.208305239	0.808304286	-1.821374383	8.22E-07	0.000130104	photosystem II 22 kDa protein, chloroplastic [Brassica rapa]	ko01100//Metabolic pathways;ko00195//Photosynthesis	-	-	GO:1990066//energy quenching
ncbi_106350933	LOC106350933	0	0	0	5.16	2.78	0.67	0.17	0	0	0.0567	2.87	0	-11.48683502	1.73E-06	0.000341166	5.824428435	0.514163674	0.872714402	ultraviolet-B receptor UVR8 [Brassica rapa]	-	-	-	-
ncbi_106350938	LOC106350938	6.85	3.84	4.25	4.08	3.38	7.01	10.31	13.45	9.09	10.95	4.8233	4.98	0.046115226	0.464538233	0.98184275	1.136713222	0.000144045	0.006706038	zinc finger protein NUTCRACKER-like isoform X1 [Brassica rapa]	-	-	GO:0097159//organic cyclic compound binding	-
ncbi_106350961	LOC106350961	1.79	0.79	2.08	0.72	0.58	0.13	3.03	0.96	0.97	1.6533	0.4767	1.5533	1.704314808	0.000813496	0.03563354	0.090010166	0.796768192	0.931552167	BnaA06g36980D [Brassica napus]	-	-	GO:0046872//metal ion binding	-
ncbi_106350977	LOC106350977	2.41	17.43	17.52	42.26	84.25	8.96	0.06	0.12	0.18	0.12	45.1567	12.4533	-1.85840704	0.179007941	0.76499874	-6.697353738	5.14E-11	3.96E-08	BnaA06g00460D [Brassica napus]	-	-	-	GO:0033554//cellular response to stress
ncbi_106351005	LOC106351005	103.45	13.95	10.99	8	5.25	68.88	241.37	567.66	146.67	318.5667	27.3767	42.7967	0.644551635	1	1	2.89602498	0.00057752	0.01822258	late seed maturation protein P8B6-like [Brassica rapa]	-	-	-	GO:0048507//meristem development
ncbi_106351133	LOC106351133	1.38	4.02	3.45	4.95	5.35	2.31	0.12	0.05	0.58	0.25	4.2033	2.95	-0.510818915	0.892884826	0.984859178	-3.560714954	0.000271176	0.010691247	transcription factor bHLH95 [Brassica rapa]	-	-	GO:0005515//protein binding	-
ncbi_106351162	LOC106351162	11.47	13.69	13.42	18.57	1.08	0.52	0.39	0.29	4.1	1.5933	6.7233	12.86	0.935642059	1	1	-3.01277062	0.001890403	0.041123004	BnaA06g06150D [Brassica napus]	-	-	-	-
ncbi_106351181	LOC106351181	1.42	2.04	2.3	3.84	0.25	0.15	0.08	0.04	0.19	0.1033	1.4133	1.92	0.442004547	0.252655693	0.853732743	-4.215728691	6.28E-08	1.60E-05	WAT1-related protein At1g09380 [Brassica rapa]	-	-	-	-
ncbi_106351206	LOC106351206	16.16	30.01	35.49	0.78	10.94	53.64	87.79	131.03	67.4	95.4067	21.7867	27.22	0.321221584	0.664585493	0.984859178	1.809423013	8.26E-05	0.004389185	BnaA06g04460D [Brassica napus]	-	GO:0043231//intracellular membrane-bounded organelle	-	-
ncbi_106351214	LOC106351214	70.98	19.19	15.19	50.38	13.45	40.61	90.71	168.51	117.13	125.45	34.8133	35.12	0.012652888	0.567514381	0.984859178	1.836747721	0.001325944	0.032174835	desiccation-related protein PCC13-62 [Brassica rapa]	-	-	-	-
ncbi_106351228	LOC106351228	0.91	2.03	1.5	1.37	1.51	0.62	0.41	0.22	0.36	0.33	1.1667	1.48	0.343204755	0.085516865	0.567220245	-2.165059246	0.000823521	0.023290766	BnaA06g07320D [Brassica napus]	-	GO:0043231//intracellular membrane-bounded organelle	-	-
ncbi_106351247	LOC106351247	0.64	3.97	3.66	0.14	0	0	0	0	1.89	0.63	0.0467	2.7567	5.884388597	0.000111562	0.008775548	-2.129501095	0.233184551	0.638009382	BnaA06g07870D [Brassica napus]	-	-	-	-
ncbi_106351274	LOC106351274	0.04	0.08	0.16	1.82	2.16	0.78	0	0	0.08	0.0267	1.5867	0.0933	-4.087462841	4.86E-05	0.004730492	-1.807354922	0.415309477	0.816555799	BnaA06g08670D [Brassica napus]	ko03410//Base excision repair	-	GO:0043733//DNA-3-methylbase glycosylase activity	-
ncbi_106351300	LOC106351300	0.92	1.02	1.54	2.64	2.73	1.19	0	0	0	0	2.1867	1.16	-0.914608509	0.516263147	0.984859178	-10.17990909	6.53E-06	0.000654164	BnaA06g09450D [Brassica napus]	-	-	-	-
ncbi_106351329	LOC106351329	1.59	2.01	1.8	11.06	7.98	5.6	0.89	0.26	0.44	0.53	8.2133	1.8	-2.189970944	2.01E-06	0.000384405	-1.763932642	0.016265777	0.159206578	BnaA04g05260D [Brassica napus]	-	-	-	GO:0044248//cellular catabolic process
ncbi_106351348	BNAANNG09400D	2.55	3.01	3.19	83.88	13.86	4.65	0.18	0.24	0.09	0.17	34.13	2.9167	-3.548647993	0.000767028	0.03444406	-4.100713865	1.07E-10	7.77E-08	BnaAnng09400D [Brassica napus]	-	-	-	-
ncbi_106351424	LOC106351424	70.12	122.04	115.6	36.49	30.9	44.55	48.04	24.19	77.68	49.97	37.3133	102.5867	1.459080082	2.95E-05	0.003256613	-1.037709111	0.067780816	0.34669539	protein MOTHER of FT and TF 1 [Brassica rapa]	-	GO:0043231//intracellular membrane-bounded organelle	-	-
ncbi_106351478	LOC106351478	0.64	0.63	0.46	4.85	0.8	23.06	0.14	0	0	0.0467	9.57	0.5767	-4.052709388	0.000772929	0.034538899	-3.627273306	0.020646403	0.18263692	BnaCnng28600D [Brassica napus]	-	-	GO:0016787//hydrolase activity	-
ncbi_106351491	LOC106351491	0	1.46	1.51	0	0	0	0.08	0	0.12	0.0667	0	0.99	9.951284715	0.000454971	0.023756869	-3.892391026	0.024009575	0.19807645	hippocampus abundant transcript 1 protein-like isoform X1 [Brassica rapa]	-	-	-	GO:0045491//xylan metabolic process
ncbi_106351495	LOC106351495	2.24	1.4	1.78	0.48	0.2	0.42	2.86	4.14	5.91	4.3033	0.3667	1.8067	2.300789328	1.92E-07	6.34E-05	1.252124244	0.001449986	0.034348582	UDP-glycosyltransferase 72E3 [Brassica rapa]	ko00940//Phenylpropanoid biosynthesis	-	GO:0035251//UDP-glucosyltransferase activity	-
ncbi_106351594	LOC106351594	154.96	99.94	96.16	117.53	88.21	156.06	228.69	223.66	278.42	243.59	120.6	117.02	-0.043474784	0.439793285	0.979608159	1.057699785	2.76E-05	0.001947229	cysteine proteinase inhibitor 6-like [Brassica rapa]	-	-	GO:0046914//transition metal ion binding	-
ncbi_106351635	LOC106351635	7.91	121.33	117.38	656.63	102.59	9.37	0.53	0.23	6.66	2.4733	256.1967	82.2067	-1.639924404	0.506685892	0.984859178	-5.054726805	5.26E-05	0.003160221	probable pectinesterase/pectinesterase inhibitor 16 [Brassica rapa]	-	-	-	GO:0071555//cell wall organization
ncbi_106351736	LOC106351736	1.92	5.41	4.48	0.79	1.25	1.51	2.08	0.41	1.66	1.3833	1.1833	3.9367	1.734118035	0.001226973	0.046907971	-1.508825723	0.063404947	0.33550292	uncharacterized membrane protein At4g09580-like [Brassica rapa]	-	-	-	GO:0046474//glycerophospholipid biosynthetic process
ncbi_106351738	LOC106351738	2.67	0.83	1.78	2.11	0.86	1.9	0.09	0.11	0	0.0667	1.6233	1.76	0.116616157	0.401451189	0.960880107	-4.722466024	2.72E-05	0.001928808	BnaC07g34840D [Brassica napus]	-	-	GO:0043169//cation binding	-
ncbi_106351763	LOC106351763	3.35	4.22	4.9	17.95	13.33	10.07	1.88	3.31	3.99	3.06	13.7833	4.1567	-1.729425864	0.000253379	0.015895232	-0.441895406	0.369383523	0.780774856	BnaA06g20520D [Brassica napus]	-	-	-	GO:0046474//glycerophospholipid biosynthetic process
ncbi_106351771	LOC106351771	3.26	4.47	5.19	8.01	8.93	1.01	0	0.12	0	0.04	5.9833	4.3067	-0.474377774	0.809486368	0.984859178	-6.750427854	5.88E-11	4.48E-08	polygalacturonase inhibitor 1-like [Brassica rapa]	-	-	GO:0005515//protein binding	-
ncbi_106351782	LOC106351782	20.95	1.67	0.94	4.48	1.25	10.05	61.46	115.93	34.39	70.5933	5.26	7.8533	0.578242334	0.51843945	0.984859178	3.168154907	0.001317119	0.032029587	BnaC06g12680D [Brassica napus]	-	GO:0044444//cytoplasmic part	-	-
ncbi_106351790	LOC106351790	0.09	0.04	0	0.24	0	0.16	0.61	2.24	0.39	1.08	0.1333	0.0433	-1.621488377	0.62350158	0.984859178	4.639410285	0.000271387	0.010694137	glutathione S-transferase T3-like [Brassica rapa]	-	-	-	-
ncbi_106351914	LOC106351914	0.96	0.54	0.66	10.1	9.59	1.64	0.1	0.1	0	0.0667	7.11	0.72	-3.303780748	5.59E-05	0.005261481	-3.432959407	0.00200014	0.042659271	BnaA06g23510D [Brassica napus]	-	-	-	GO:0044767//single-organism developmental process
ncbi_106351923	LOC106351923	6.33	7.25	9.02	6.79	8.94	3.58	2.03	1.71	2.09	1.9433	6.4367	7.5333	0.226974608	0.05674246	0.469286459	-1.954754984	1.58E-06	0.000215391	BnaCnng13140D [Brassica napus]	-	GO:0043231//intracellular membrane-bounded organelle	-	-
ncbi_106351956	LOC106351956	0.2	2.54	2.06	0	0.16	0	0	0	0	0	0.0533	1.6	4.906890596	0.000944741	0.039205575	-10.64385619	0.00011216	0.005540101	BnaC06g43540D [Brassica napus]	ko04626//Plant-pathogen interaction	-	-	GO:0051171//regulation of nitrogen compound metabolic process
ncbi_106351998	LOC106351998	0.27	0.63	0.46	0.56	1.26	0.21	0.04	0	0	0.0133	0.6767	0.4533	-0.577873076	0.993530134	0.997848392	-5.087462841	0.002375784	0.04794965	probable 6-phosphogluconolactonase 4 [Brassica rapa]	ko01100//Metabolic pathways;ko01110//Biosynthesis of secondary metabolites;ko01200//Carbon metabolism;ko00030//Pentose phosphate pathway	-	GO:0052689//carboxylic ester hydrolase activity	-
ncbi_106352021	LOC106352021	2.79	0.29	0.15	0.04	0	0.68	8.28	15.94	5.2	9.8067	0.24	1.0767	2.165465353	0.260672822	0.862806323	3.187191177	0.000866834	0.02407779	heavy metal-associated isoprenylated plant protein 26 [Brassica rapa]	-	-	GO:0043169//cation binding	-
ncbi_106352092	LOC106352092	5.49	9.64	13.24	15.31	18.01	7.96	1.55	0.27	1.83	1.2167	13.76	9.4567	-0.54107682	0.955645886	0.991799364	-2.958397782	0.000119373	0.005822385	protein GLUTAMINE DUMPER 5 [Brassica rapa]	-	-	-	GO:0051955//regulation of amino acid transport
ncbi_106352104	BNAA06G27620D	0.04	0.03	0	3.07	3.02	0.5	0	0	0.07	0.0233	2.1967	0.0233	-6.556779733	6.82E-06	0.001027835	0	0.984266074	0.996437868	BnaC07g29430D [Brassica napus]	-	-	GO:0008194//UDP-glycosyltransferase activity	-
ncbi_106352110	BNAA06G27750D	4.12	5.05	3.92	2.62	4.81	3.9	1.39	1.3	2.01	1.5667	3.7767	4.3633	0.208317236	0.179750869	0.766205957	-1.477732435	0.000506635	0.016697483	uncharacterized RNA-binding protein C17H9.04c [Brassica rapa]	-	-	GO:0046914//transition metal ion binding	-
ncbi_106352130	BNAA06G28340D	1.35	0.85	1.19	1.7	1.84	1.92	3.26	3.76	2.44	3.1533	1.82	1.13	-0.687615678	0.676373103	0.984859178	1.48055491	0.00167682	0.037809658	BnaA06g28340D [Brassica napus]	-	GO:0009536//plastid	-	-
ncbi_106352313	LOC106352313	4.63	3.52	3.24	4.81	5.1	3.38	7.45	13.2	6.3	8.9833	4.43	3.7967	-0.222573358	0.352002781	0.934546766	1.242517526	0.000851936	0.023782926	BnaA01g30870D [Brassica napus]	ko03013//Nucleocytoplasmic transport	GO:0070993//translation preinitiation complex	-	-
ncbi_106352398	LOC106352398	4.31	3.61	3.31	22.29	7.59	3.4	0.64	0.09	0.65	0.46	11.0933	3.7433	-1.567297506	0.105742069	0.624263983	-3.024617756	3.56E-05	0.002359064	myb-like protein Q isoform X1 [Brassica rapa]	ko04626//Plant-pathogen interaction	-	GO:0005488//binding	-
ncbi_106352471	LOC106352471	1.36	2.69	3.82	2.62	3.76	2.36	0.65	0.26	0.3	0.4033	2.9133	2.6233	-0.151269644	0.497742498	0.984859178	-2.701356588	0.000105379	0.005280388	endoglucanase 22-like [Brassica rapa]	ko01100//Metabolic pathways;ko00500//Starch and sucrose metabolism	-	-	GO:0044238//primary metabolic process
ncbi_106352495	LOC106352495	1.98	1.3	1.44	2.33	1.93	1.78	4	6.04	2.78	4.2733	2.0133	1.5733	-0.35576169	0.76542692	0.984859178	1.441537497	0.002418804	0.048516403	BnaA06g36810D [Brassica napus]	-	-	GO:0046983//protein dimerization activity	-
ncbi_106352588	LOC106352588	3.19	9.05	8.24	47.72	26.78	13.8	1.83	0.73	1.38	1.3133	29.4333	6.8267	-2.108197723	0.006873058	0.144253344	-2.377948181	0.000129357	0.00616246	beta-galactosidase 8 [Brassica rapa]	-	-	-	GO:0044238//primary metabolic process
ncbi_106352598	LOC106352598	0.75	1.16	0.71	2.57	2.21	0.39	0.03	0.07	0.13	0.0767	1.7233	0.8733	-0.980597469	0.640317252	0.984859178	-3.509861045	4.26E-05	0.002687521	BnaAnng33820D [Brassica napus]	-	-	GO:0016740//transferase activity	-
ncbi_106352755	LOC106352755	26.81	45.8	46.98	71.92	83.46	22.74	10.23	12.25	14.95	12.4767	59.3733	39.8633	-0.574752759	0.946368514	0.99029274	-1.675829804	1.70E-05	0.001357172	tubulin beta-2 chain [Camelina sativa]	ko04145//Phagosome	-	-	GO:0043623//cellular protein complex assembly
ncbi_106352759	LOC106352759	5.25	1.65	1.79	1.68	0.24	5.37	9.24	18.36	7.6	11.7333	2.43	2.8967	0.253437362	0.666565623	0.984859178	2.018147347	0.000191932	0.008316041	cell division control protein 48 homolog D [Brassica rapa]	ko04141//Protein processing in endoplasmic reticulum	GO:0044444//cytoplasmic part	-	-
ncbi_106352778	LOC106352778	0.76	0.57	0.3	7.87	3.75	3.36	0.12	0.04	0.26	0.14	4.9933	0.5433	-3.200093754	1.43E-07	5.07E-05	-1.956410731	0.055066173	0.311334584	BnaC03g23100D [Brassica napus]	-	-	-	-
ncbi_106352918	LOC106352918	0.23	0.69	0.63	1.75	1.05	0.42	0.15	0.07	0.1	0.1067	1.0733	0.5167	-1.054792473	0.5206384	0.984859178	-2.276124405	0.001894504	0.041200569	BnaA07g16860D [Brassica napus]	-	-	-	-
ncbi_106352938	LOC106352938	20.87	14.3	14.06	23.47	25.83	17.92	31.15	60.64	27.99	39.9267	22.4067	16.41	-0.449352803	0.892277849	0.984859178	1.282777393	0.000391809	0.013827501	developmentally-regulated G-protein 3 [Brassica rapa]	-	GO:0044444//cytoplasmic part	-	-
ncbi_106352972	BNACNNG66810D	16.83	8.81	7.04	46.06	45.25	40.32	16.11	13.09	6.24	11.8133	43.8767	10.8933	-2.010008445	6.76E-05	0.006058248	0.11697062	0.688972995	0.926751401	BnaCnng66810D [Brassica napus]	-	GO:0009536//plastid	-	-
ncbi_106352977	LOC106352977	12.88	5.23	5.28	7.71	6.54	4.1	24.13	48.66	10.6	27.7967	6.1167	7.7967	0.350111799	0.048744025	0.435395327	1.833982527	0.002311152	0.047074958	BnaA01g23660D [Brassica napus]	-	GO:0044444//cytoplasmic part	-	-
ncbi_106353002	LOC106353002	20.79	3.14	1.82	14.69	13.62	3.14	0.53	0.18	1.21	0.64	10.4833	8.5833	-0.288487585	0.788779871	0.984859178	-3.745394216	0.000824847	0.023306412	non-specific lipid-transfer protein 6-like [Brassica rapa]	-	-	-	GO:0051234//establishment of localization
ncbi_106353011	LOC106353011	0	0.92	0.77	0	0	0	0	0	1.06	0.3533	0	0.5633	9.13784503	0.000363604	0.020502494	-0.672958982	0.855206706	0.943856729	BnaC03g36500D [Brassica napus]	-	-	-	GO:0045184//establishment of protein localization
ncbi_106353051	LOC106353051	1.75	7.47	7.55	13.97	28.1	6.48	1.28	0.13	0.22	0.5433	16.1833	5.59	-1.533588607	0.194943874	0.789114539	-3.362938819	0.000873624	0.024197249	BnaA03g31730D [Brassica napus]	-	-	-	GO:0043207//response to external biotic stimulus
ncbi_106353087	LOC106353087	12	8.49	6.65	10.36	6.53	8.35	14.52	26.45	15.26	18.7433	8.4133	9.0467	0.10470881	0.118198443	0.653304835	1.050919326	0.001863969	0.040690309	protein ELC [Brassica rapa]	ko04144//Endocytosis	-	-	GO:0045184//establishment of protein localization
ncbi_106353104	LOC106353104	10.63	13.93	13.7	27.62	34.55	12.48	6.18	4.19	2.86	4.41	24.8833	12.7533	-0.964305387	0.298211628	0.898650767	-1.532023812	0.000585016	0.018348684	BnaA03g32440D [Brassica napus]	ko01100//Metabolic pathways;ko01110//Biosynthesis of secondary metabolites;ko01200//Carbon metabolism;ko01230//Biosynthesis of amino acids;ko00010//Glycolysis / Gluconeogenesis;ko00710//Carbon fixation in photosynthetic organisms	-	-	GO:0045087//innate immune response
ncbi_106353133	LOC106353133	12.01	16.47	16.91	15.32	21.01	10.51	7.69	6.01	7.5	7.0667	15.6133	15.13	-0.045366588	0.16898797	0.748106116	-1.098310223	0.001698802	0.038062457	BnaA07g18600D [Brassica napus]	ko01100//Metabolic pathways;ko01200//Carbon metabolism;ko00670//One carbon pool by folate	GO:0044444//cytoplasmic part	-	-
ncbi_106353136	LOC106353136	0.03	0.13	0	4.99	0.6	0.39	0.08	0	0.03	0.0367	1.9933	0.0533	-5.224001674	0.00050543	0.025612707	-0.540568381	0.937847842	0.983157006	BnaA07g18580D [Brassica napus]	ko00310//Lysine degradation	GO:0043231//intracellular membrane-bounded organelle	-	-
ncbi_106353143	LOC106353143	1.73	2.55	2.47	7.51	9.23	1.73	0.49	0.22	0.6	0.4367	6.1567	2.25	-1.452224459	0.142990473	0.700697952	-2.36532069	1.95E-05	0.001494686	BnaA07g18520D [Brassica napus]	-	-	-	-
ncbi_106353148	LOC106353148	2.52	1.1	1.1	1.53	0.65	1.78	3.76	7.34	3.98	5.0267	1.32	1.5733	0.253286429	0.311735663	0.907846216	1.675777664	0.000141978	0.00662567	protein NLP9 [Brassica rapa]	-	-	-	GO:0009687//abscisic acid metabolic process
ncbi_106353152	LOC106353152	0.54	2.39	2.66	4.52	7	0.61	0	0	0.11	0.0367	4.0433	1.8633	-1.117659362	0.620014207	0.984859178	-5.667272854	0.000112111	0.005540101	calmodulin-like protein 4 [Brassica rapa]	ko04626//Plant-pathogen interaction	-	GO:0046872//metal ion binding	-
ncbi_106353178	LOC106353178	2.42	0.91	0.72	1.36	1.22	1.29	3.03	5.63	9.99	6.2167	1.29	1.35	0.065588342	0.430801376	0.974070913	2.203181817	0.000356636	0.012997373	ribosomal L1 domain-containing protein 1 [Brassica rapa]	-	GO:0044444//cytoplasmic part	-	-
ncbi_106353179	LOC106353179	3.28	6.51	7.34	1.56	2.63	2	5.53	1.56	5.15	4.08	2.0633	5.71	1.468513837	0.000253415	0.015895232	-0.484921593	0.508881623	0.869577115	serine/threonine-protein kinase At3g07070-like [Brassica rapa]	-	-	GO:0032550//purine ribonucleoside binding	-
ncbi_106353243	LOC106353243	0	0	0	0	0	0	0	5.52	0.63	2.05	0	0	0	1	1	11.00140819	0.00117578	0.029532986	long chain base biosynthesis protein 2b-like [Brassica rapa]	ko01100//Metabolic pathways;ko00600//Sphingolipid metabolism	-	-	GO:0048229//gametophyte development
ncbi_106353244	LOC106353244	23.5	17.75	18.19	4.4	7.12	15.44	57.87	37.91	33.67	43.15	8.9867	19.8133	1.140613619	0.026944832	0.319733124	1.122888944	0.000572249	0.018078287	BnaA07g17130D [Brassica napus]	-	GO:0043231//intracellular membrane-bounded organelle	-	-
ncbi_106353258	LOC106353258	24.31	14.57	19.06	28.06	36.11	32.69	28.08	55.78	39.84	41.2333	32.2867	19.3133	-0.741341318	0.415745379	0.967897952	1.094213911	0.000937278	0.025373144	BnaAnng08010D [Brassica napus]	ko03010//Ribosome	-	GO:0043169//cation binding	-
ncbi_106353307	LOC106353307	4.62	5.59	6.89	10.61	9.48	3.91	2.76	2.89	2.33	2.66	8	5.7	-0.489038081	0.800403006	0.984859178	-1.099535674	0.002057678	0.04354335	BnaA07g19180D [Brassica napus]	ko00970//Aminoacyl-tRNA biosynthesis	GO:0044444//cytoplasmic part	-	-
ncbi_106353334	LOC106353334	2.99	7.06	6.92	11.63	15.15	12.02	0.66	0.55	1.19	0.8	12.9333	5.6567	-1.193070088	0.150907644	0.715081197	-2.821880254	5.40E-07	9.19E-05	lipoxygenase 2, chloroplastic-like [Brassica rapa]	ko01100//Metabolic pathways;ko01110//Biosynthesis of secondary metabolites;ko00592//alpha-Linolenic acid metabolism;ko00591//Linoleic acid metabolism	-	-	GO:0070838//divalent metal ion transport
ncbi_106353348	LOC106353348	0.28	0.52	0.56	0.78	0.52	0.15	0	0.05	0.02	0.0233	0.4833	0.4533	-0.092446249	0.394611506	0.958291179	-4.280107919	3.19E-05	0.002179151	BnaA07g19750D [Brassica napus]	-	GO:0043231//intracellular membrane-bounded organelle	-	-
ncbi_106353350	LOC106353350	0.81	1.83	1.64	3.31	3.46	1.3	0.26	0.15	0.31	0.24	2.69	1.4267	-0.914957877	0.527253963	0.984859178	-2.571541985	1.81E-05	0.001418014	coatomer subunit beta'-1 [Brassica rapa]	-	-	-	GO:0051603//proteolysis involved in cellular protein catabolic process
ncbi_106353367	LOC106353367	1.21	0.65	0.38	6.41	7.31	4.64	0.39	0.47	0.3	0.3867	6.12	0.7467	-3.034995421	2.00E-06	0.000383058	-0.949373927	0.318107391	0.734799908	BnaC01g00340D [Brassica napus]	-	-	-	-
ncbi_106353368	LOC106353368	5.97	5.17	4.53	25.97	10.95	10.39	1.55	1.11	2.2	1.62	15.77	5.2233	-1.594139981	0.003899555	0.101671647	-1.688976961	3.06E-05	0.002108287	BnaA07g19880D [Brassica napus]	ko01100//Metabolic pathways;ko04626//Plant-pathogen interaction;ko00561//Glycerolipid metabolism	-	-	GO:0052646//alditol phosphate metabolic process
ncbi_106353383	LOC106353383	6.45	13.24	15.46	14.54	23.33	5.93	4.5	2.41	3.59	3.5	14.6	11.7167	-0.317406181	0.618838384	0.984859178	-1.743135361	0.001036762	0.027176369	myosin-9-like [Brassica rapa]	-	-	-	GO:0016458//gene silencing
ncbi_106353393	LOC106353393	83.8	157.62	150.13	25.75	53.05	51.67	52.58	18.59	111.43	60.8667	43.49	130.5167	1.585478433	0.000238591	0.015268904	-1.100509783	0.12186461	0.469046469	nudix hydrolase 3 [Brassica rapa]	-	GO:0044444//cytoplasmic part	-	-
ncbi_106353425	LOC106353425	5.74	24.52	23.65	25.4	34.5	2.57	1.9	1.25	3.75	2.3	20.8233	17.97	-0.21261062	0.591967109	0.984859178	-2.965884643	3.66E-05	0.002406095	BnaA01g34710D, partial [Brassica napus]	ko01100//Metabolic pathways;ko00562//Inositol phosphate metabolism	GO:0044424//intracellular part	-	-
ncbi_106353435	LOC106353435	16.1	6.3	6.74	8.89	11.6	14.26	32.68	61.66	22.06	38.8	11.5833	9.7133	-0.2540121	0.833081062	0.984859178	1.998018276	0.000103819	0.005227898	BnaA01g34650D [Brassica napus]	ko03010//Ribosome	-	GO:0036094//small molecule binding	-
ncbi_106353439	LOC106353439	61.53	83.95	85.4	193.75	221.31	79.02	24.2	8.26	22.44	18.3	164.6933	76.96	-1.097601453	0.178403126	0.763805152	-2.072265151	0.000124118	0.005993651	BnaA07g20570D [Brassica napus]	ko00480//Glutathione metabolism	-	GO:0072341//modified amino acid binding	-
ncbi_106353479	LOC106353479	1.69	2.33	2.17	4.17	4.83	1.9	0.53	0.42	0.55	0.5	3.6333	2.0633	-0.81631682	0.554856388	0.984859178	-2.044976909	4.22E-05	0.002661767	caffeic acid 3-O-methyltransferase-like [Brassica rapa]	-	GO:0044444//cytoplasmic part	-	-
ncbi_106353489	LOC106353489	4.64	2.86	2.96	1.99	1.19	3.82	7.53	7.94	5.91	7.1267	2.3333	3.4867	0.579456024	0.154427684	0.721556506	1.031379001	0.000296877	0.011454728	BnaC06g21200D [Brassica napus]	-	-	GO:0031406//carboxylic acid binding	-
ncbi_106353544	LOC106353544	695.79	170.2	197.64	4.25	0.39	293.16	1679.97	1522.52	1761.79	1654.76	99.2667	354.5433	1.836580715	1	1	2.222588115	2.54E-05	0.001835664	BnaA07g21570D [Brassica napus]	ko04016//MAPK signaling pathway - plant	-	-	GO:0009620//response to fungus
ncbi_106353550	LOC106353550	6.08	4.91	5.2	73.85	38.11	11.76	0.49	0.06	0.96	0.5033	41.24	5.3967	-2.933903848	1.65E-05	0.002065096	-3.422482531	2.48E-05	0.001808994	dehydrin ERD14-like [Brassica rapa]	-	-	GO:0046872//metal ion binding	-
ncbi_106353554	LOC106353554	1.8	3.04	2.76	5.27	4.94	1.86	0.74	0.53	1.15	0.8067	4.0233	2.5333	-0.667354352	0.861423105	0.984859178	-1.650992371	0.001967979	0.042208126	squalene synthase [Brassica rapa]	ko01100//Metabolic pathways;ko01110//Biosynthesis of secondary metabolites;ko00100//Steroid biosynthesis;ko00909//Sesquiterpenoid and triterpenoid biosynthesis	GO:0043231//intracellular membrane-bounded organelle	-	-
ncbi_106353576	LOC106353576	0.84	2.26	1.37	0.09	0.09	0.07	0.03	0.03	5.04	1.7	0.0833	1.49	4.160274831	7.72E-13	2.11E-09	0.190222416	0.887350301	0.959123912	BnaC03g71330D [Brassica napus]	-	-	GO:0032550//purine ribonucleoside binding	-
ncbi_106353580	LOC106353580	1.62	3.03	1.59	0.33	0.06	0.09	0.06	0.1	4.52	1.56	0.16	2.08	3.700439718	4.48E-09	3.31E-06	-0.415037499	1	1	BnaC03g71310D [Brassica napus]	-	-	-	GO:0042548//regulation of photosynthesis, light reaction
ncbi_106353581	LOC106353581	1.36	13.72	14.42	0.08	0.08	0.2	0.06	0.06	9.75	3.29	0.12	9.8333	6.356574238	1.11E-11	2.18E-08	-1.579592965	1	1	mannan endo-1,4-beta-mannosidase 6 isoform X1 [Brassica rapa]	ko00051//Fructose and mannose metabolism	-	-	GO:0044707//single-multicellular organism process
ncbi_106353589	LOC106353589	0.18	0.8	0.72	0	0	0.06	0	0	1.27	0.4233	0.02	0.5667	4.824428435	0.001320278	0.049057771	-0.420706249	0.833470929	0.935697577	eukaryotic translation initiation factor 2 subunit beta isoform X2 [Brassica rapa]	ko03013//Nucleocytoplasmic transport	-	-	GO:0006412//translation
ncbi_106353655	BNAA07G21970D	1.76	4.07	3.3	5.9	7.19	2.6	0.57	0.19	1.01	0.59	5.23	3.0433	-0.781158587	0.698756065	0.984859178	-2.3668655	0.001678576	0.037809988	BnaA07g21970D [Brassica napus]	-	GO:0043231//intracellular membrane-bounded organelle	-	-
ncbi_106353661	LOC106353661	2.45	9.34	8.42	42.74	0.44	0.18	0.07	0.04	0.04	0.05	14.4533	6.7367	-1.101295435	1	1	-7.073963011	1.15E-12	1.42E-09	BnaA01g00810D [Brassica napus]	-	-	-	GO:0044238//primary metabolic process
ncbi_106353683	LOC106353683	6.89	4.8	5.52	15.92	14.93	4.05	2.39	3.1	2.03	2.5067	11.6333	5.7367	-1.019979939	0.360652079	0.941850967	-1.19444253	0.001056229	0.027510252	50S ribosomal protein L17, chloroplastic [Brassica rapa]	ko03010//Ribosome	GO:0030529//intracellular ribonucleoprotein complex	-	-
ncbi_106353695	LOC106353695	7.23	24.08	25.42	49.52	64.01	14.14	5.96	2.62	2.56	3.7133	42.5567	18.91	-1.17023579	0.412486491	0.966762381	-2.348362631	0.000493709	0.016410585	BnaA07g22620D [Brassica napus]	ko00564//Glycerophospholipid metabolism	-	-	GO:0046165//alcohol biosynthetic process
ncbi_106353719	LOC106353719	4.07	1.91	2.85	10.49	8.49	3.22	0.73	0.97	0.79	0.83	7.4	2.9433	-1.330074334	0.101779395	0.613794038	-1.826267696	0.000744408	0.021839821	BnaC08g07440D [Brassica napus]	ko01100//Metabolic pathways;ko01110//Biosynthesis of secondary metabolites;ko01200//Carbon metabolism;ko00630//Glyoxylate and dicarboxylate metabolism;ko00260//Glycine, serine and threonine metabolism	-	-	GO:0042254//ribosome biogenesis
ncbi_106353746	LOC106353746	0	1.24	1.12	0.02	0.02	0.02	0.02	0	0	0.0067	0.02	0.7867	5.297680549	0.000542708	0.027017839	-6.882643049	0.001768369	0.039181439	BnaCnng07860D [Brassica napus]	ko03013//Nucleocytoplasmic transport;ko03015//mRNA surveillance pathway;ko03018//RNA degradation	-	GO:0036094//small molecule binding	-
ncbi_106353769	BNAA07G23070D	11.99	24.78	22.44	25.24	40.26	15.43	4.36	2.41	7.43	4.7333	26.9767	19.7367	-0.450833742	0.831282215	0.984859178	-2.059949924	0.000505062	0.016652703	small auxin up RNA protein [Sinapis alba]	-	GO:0043231//intracellular membrane-bounded organelle	-	-
ncbi_106353777	LOC106353777	16.14	19.48	17.54	29.77	32.61	24.65	4.06	0.52	3.63	2.7367	29.01	17.72	-0.711171692	0.421273748	0.970743747	-2.694886977	0.000327942	0.012299344	BnaC02g19980D [Brassica napus]	ko01100//Metabolic pathways;ko00380//Tryptophan metabolism	-	GO:0070548//L-glutamine aminotransferase activity	-
ncbi_106353810	LOC106353810	17.08	19.97	19.58	3.91	5.38	8.96	11.02	5.9	29.41	15.4433	6.0833	18.8767	1.633670066	0.000232541	0.01502236	-0.289619847	0.704819604	0.931552167	uncharacterized acetyltransferase At3g50280-like isoform X2 [Brassica rapa]	-	-	GO:0016746//transferase activity, transferring acyl groups	-
ncbi_106353815	LOC106353815	12.67	21.44	17.86	95.63	32.61	17.49	1.79	0.3	3.71	1.9333	48.5767	17.3233	-1.487546937	0.138245434	0.693407722	-3.163554254	0.000108413	0.005403058	BnaC06g01870D [Brassica napus]	-	-	-	GO:0046942//carboxylic acid transport
ncbi_106353816	LOC106353816	3.15	5.14	3.99	20.39	6.08	3.71	0.39	0.07	0.69	0.3833	10.06	4.0933	-1.297282245	0.278412396	0.879641921	-3.416604794	4.61E-06	0.000501003	BnaC06g01870D [Brassica napus]	-	-	-	GO:0046942//carboxylic acid transport
ncbi_106353834	LOC106353834	138.5	84.27	82.43	84.73	86.58	141.72	210.67	219.9	191.44	207.3367	104.3433	101.7333	-0.036545966	0.494197455	0.984859178	1.027182812	3.43E-05	0.002293002	PLASMODESMATA CALLOSE-BINDING PROTEIN 4-like [Brassica rapa]	-	GO:0031224//intrinsic component of membrane	-	-
ncbi_106353865	LOC106353865	4.17	5.4	5.21	11.36	12.41	3.91	2	1.82	1.99	1.9367	9.2267	4.9267	-0.905197673	0.445329502	0.979771144	-1.347036201	3.22E-05	0.002192982	microtubule-associated protein 70-1-like [Brassica rapa]	-	GO:0055028//cortical microtubule	-	-
ncbi_106353872	LOC106353872	0.25	3.31	3.28	0.29	0.38	0.22	0.02	0.04	0.18	0.08	0.2967	2.28	2.942119084	0.000122205	0.009396482	-4.832890014	2.10E-05	0.001590109	BnaC06g26150D [Brassica napus]	-	GO:0055028//cortical microtubule	-	-
ncbi_106353899	LOC106353899	0.08	0.04	0.08	2.08	1.28	0.19	0.09	0.07	0.04	0.0667	1.1833	0.0667	-4.14974712	0.000457035	0.023777101	0	0.922559411	0.975442345	MATE efflux family protein 5-like isoform X2 [Brassica rapa]	-	-	-	GO:0044763//single-organism cellular process
ncbi_106353961	LOC106353961	0.13	2.74	3.32	0.02	0.02	0.1	0.05	0.05	0.1	0.0667	0.0467	2.0633	5.466440677	4.81E-06	0.00077938	-4.951867504	2.31E-05	0.001713397	BnaC09g21650D [Brassica napus]	-	-	-	-
ncbi_106353963	LOC106353963	0.03	16.12	14.05	0.01	0.01	0	0	0.05	6.95	2.3333	0.0067	10.0667	10.56033283	6.41E-10	6.50E-07	-2.109121722	0.444789734	0.833750347	BnaC06g28770D [Brassica napus]	-	-	GO:0043169//cation binding	-
ncbi_106353966	LOC106353966	1.86	10	9.97	1.82	1.67	1.43	0.94	1.39	1.23	1.1867	1.64	7.2767	2.14958191	7.59E-05	0.006628436	-2.616362984	0.000140526	0.006577634	ATP-dependent zinc metalloprotease FTSH 1, chloroplastic [Brassica rapa]	-	GO:0044436//thylakoid part	-	-
ncbi_106353969	LOC106353969	0.2	28.21	27.23	0.87	0.58	1.11	0.25	0.15	0.25	0.2167	0.8533	18.5467	4.441906705	5.70E-05	0.005330434	-6.419538892	3.26E-07	6.20E-05	very-long-chain 3-oxoacyl-CoA reductase 1 [Brassica rapa]	ko01100//Metabolic pathways;ko01110//Biosynthesis of secondary metabolites;ko01212//Fatty acid metabolism;ko00062//Fatty acid elongation;ko01040//Biosynthesis of unsaturated fatty acids	GO:0043231//intracellular membrane-bounded organelle	-	-
ncbi_106353970	LOC106353970	0.31	5.44	4.62	0.76	1.25	0.34	0	0	0.17	0.0567	0.7833	3.4567	2.141683232	0.007088182	0.147298808	-5.930737338	0.000110298	0.005475938	photosystem II core complex proteins psbY, chloroplastic [Brassica rapa]	ko01100//Metabolic pathways;ko00195//Photosynthesis	-	GO:0046914//transition metal ion binding	-
ncbi_106353978	LOC106353978	2.58	1.89	1.46	2.27	1.84	2.46	3.74	5.75	3.79	4.4267	2.19	1.9767	-0.147861266	0.525010965	0.984859178	1.163151137	0.001626998	0.037008243	sufE-like protein 2, chloroplastic [Brassica rapa]	-	-	-	GO:0065007//biological regulation
ncbi_106353990	LOC106353990	4.91	1.98	1.73	14.67	11.23	3.53	0.63	0.62	0.94	0.73	9.81	2.8733	-1.771527768	0.033490907	0.35775267	-1.976756999	0.001143241	0.02897117	BnaA07g26770D [Brassica napus]	ko01100//Metabolic pathways;ko01110//Biosynthesis of secondary metabolites;ko01200//Carbon metabolism;ko00630//Glyoxylate and dicarboxylate metabolism;ko00260//Glycine, serine and threonine metabolism	-	-	GO:0044257//cellular protein catabolic process
ncbi_106354008	LOC106354008	66.68	35.47	32.53	33.33	31.93	70.87	85.37	98.76	102.01	95.38	45.3767	44.8933	-0.015449413	0.604890425	0.984859178	1.087185562	0.000363298	0.013125138	universal stress protein A-like protein [Brassica rapa]	-	GO:0044424//intracellular part	-	-
ncbi_106354013	LOC106354013	1.58	2.43	2.5	8.18	6.71	6.63	1.3	1.49	3.35	2.0467	7.1733	2.17	-1.724948629	0.001287694	0.048328571	-0.084418888	0.918901827	0.973945992	BnaA07g27120D [Brassica napus]	-	GO:0043231//intracellular membrane-bounded organelle	-	-
ncbi_106354024	LOC106354024	0.07	0.12	0.04	0.03	0.03	0	0.55	1.58	0.26	0.7967	0.02	0.0767	1.938599455	0.187049449	0.775898565	3.377304852	0.001513638	0.035371269	BnaA07g27290D [Brassica napus]	-	-	-	-
ncbi_106354025	LOC106354025	3.82	1.99	2.14	9.33	9.66	2.54	0.57	0.43	0.62	0.54	7.1767	2.65	-1.437321554	0.110610195	0.636916914	-2.294961047	0.000209674	0.008927442	30S ribosomal protein 3-1, chloroplastic-like [Brassica rapa]	-	GO:0030529//intracellular ribonucleoprotein complex	-	-
ncbi_106354033	LOC106354033	0.18	0.39	0.32	1.44	1.17	1.1	0.13	0.06	0.26	0.15	1.2367	0.2967	-2.059541946	0.000804951	0.03533474	-0.983880335	0.219877658	0.620592039	BnaA07g27360D [Brassica napus]	-	-	GO:0046872//metal ion binding	-
ncbi_106354058	LOC106354058	97.81	50.54	46.68	52.77	43.34	83.84	130.5	149.91	147.35	142.5867	59.9833	65.01	0.116099958	0.371022047	0.949462314	1.133105522	0.000239857	0.009825144	PLASMODESMATA CALLOSE-BINDING PROTEIN 4-like [Brassica rapa]	-	GO:0031224//intrinsic component of membrane	-	-
ncbi_106354078	LOC106354078	39.77	21.65	26.52	15.45	15.23	6.23	3.38	0.82	1.61	1.9367	12.3033	29.3133	1.252507795	5.53E-07	0.00013836	-3.919909464	1.41E-10	9.87E-08	expansin-A1 precursor [Brassica rapa]	-	-	-	GO:0048646//anatomical structure formation involved in morphogenesis
ncbi_106354079	LOC106354079	31.49	14.45	14.17	25.73	23.26	16.95	39.7	74.17	34.14	49.3367	21.98	20.0367	-0.133548867	0.349823368	0.933498304	1.300017727	0.002370552	0.047920775	BnaA07g28110D [Brassica napus]	ko01100//Metabolic pathways;ko00240//Pyrimidine metabolism;ko00250//Alanine, aspartate and glutamate metabolism	-	GO:0016884//carbon-nitrogen ligase activity, with glutamine as amido-N-donor	-
ncbi_106354088	LOC106354088	26.49	34.94	33.9	81.72	100.16	34.98	13	6.53	13.37	10.9667	72.2867	31.7767	-1.18576177	0.11266218	0.641305988	-1.534842712	0.000707413	0.021104848	photosystem I reaction center subunit V, chloroplastic-like [Brassica rapa]	ko01100//Metabolic pathways;ko00195//Photosynthesis	-	GO:0046906//tetrapyrrole binding	-
ncbi_106354136	LOC106354136	1.03	0.99	1.99	72.27	45.18	2.43	0.53	1.26	0.1	0.63	39.96	1.3367	-4.901844942	3.52E-06	0.000602707	-1.085216002	0.224751452	0.626793571	GDSL esterase/lipase At1g71250 [Brassica rapa]	-	-	-	GO:0044238//primary metabolic process
ncbi_106354140	LOC106354140	22.86	6.45	6.3	6.41	6.62	14.71	38.29	50.68	34.66	41.21	9.2467	11.87	0.360314648	0.36791492	0.947194993	1.795674529	0.000467408	0.015755442	BnaA07g29260D [Brassica napus]	ko01100//Metabolic pathways;ko01110//Biosynthesis of secondary metabolites;ko01200//Carbon metabolism;ko01230//Biosynthesis of amino acids;ko00630//Glyoxylate and dicarboxylate metabolism;ko00260//Glycine, serine and threonine metabolism;ko00460//Cyanoamino acid metabolism;ko00670//One carbon pool by folate	-	GO:0046914//transition metal ion binding	-
ncbi_106354142	BNAA07G29290D	1.74	1.57	1.55	8.74	5.75	2.76	4.15	9.73	3.89	5.9233	5.75	1.62	-1.827568143	0.000844049	0.036465667	1.870415462	2.73E-05	0.001933906	BnaA07g29290D [Brassica napus]	-	-	-	-
ncbi_106354153	LOC106354153	0.2	0.96	0.78	3.69	4.08	0.34	0	0	0	0	2.7033	0.6467	-2.063645262	0.146164952	0.706693862	-9.336878436	4.69E-05	0.002902062	GDSL esterase/lipase At1g71691 [Brassica rapa]	-	-	-	GO:0044238//primary metabolic process
ncbi_106354154	LOC106354154	2.49	9.03	8.64	8.43	11.27	2.26	0.72	0.77	2.31	1.2667	7.32	6.72	-0.123382416	0.46831266	0.983865745	-2.407424315	0.001431242	0.034028988	BnaA07g29430D [Brassica napus]	-	-	-	-
ncbi_106354178	LOC106354178	2.29	1.18	1.61	1.7	1.93	1.51	3.11	5.42	4.71	4.4133	1.7133	1.6933	-0.016939862	0.266701586	0.867433033	1.38200272	0.000168962	0.007593251	BnaA07g29660D [Brassica napus]	-	GO:0043231//intracellular membrane-bounded organelle	-	-
ncbi_106354179	LOC106354179	0.61	0.37	0.36	0.71	0.21	0.19	1.28	1.47	1.1	1.2833	0.37	0.4467	0.271673324	0.217309627	0.819992998	1.522625445	0.000368258	0.013248942	LOW QUALITY PROTEIN: MATE efflux family protein 5 [Brassica rapa]	-	GO:0031224//intrinsic component of membrane	-	-
ncbi_106354226	LOC106354226	0	2.56	2.7	0.02	0.03	0.05	0	0	2.77	0.9233	0.0333	1.7533	5.716990894	0.000155181	0.011182126	-0.925176823	1	1	BnaA06g19560D [Brassica napus]	ko03420//Nucleotide excision repair;ko03440//Homologous recombination;ko03030//DNA replication;ko03430//Mismatch repair	-	-	-
ncbi_106354242	LOC106354242	2.44	1.47	1.41	3.99	2.45	2.67	3.36	5.02	3.82	4.0667	3.0367	1.7733	-0.776024808	0.441455349	0.979771144	1.197382997	0.000308574	0.011754368	solute carrier family 25 member 44 [Brassica rapa]	-	-	-	GO:1902582//single-organism intracellular transport
ncbi_106354250	LOC106354250	1.12	0.96	1.58	2.65	2.14	1.53	0.13	0.17	0.26	0.1867	2.1067	1.22	-0.78808091	0.516344707	0.984859178	-2.708344916	4.14E-05	0.002634893	ribulose bisphosphate carboxylase/oxygenase activase, chloroplastic [Brassica rapa]	-	-	GO:0032550//purine ribonucleoside binding	-
ncbi_106354274	LOC106354274	1.06	1.05	1.45	13.21	32.11	11.07	0.58	0.28	0.02	0.2933	18.7967	1.1867	-3.985490197	1.37E-10	1.79E-07	-2.016301812	0.088992597	0.398736454	BnaC06g34290D [Brassica napus]	-	-	GO:0061135//endopeptidase regulator activity	-
ncbi_106354307	LOC106354307	1.75	2.72	3.71	2.1	4.81	1.5	0.67	0.51	0.73	0.6367	2.8033	2.7267	-0.040004957	0.402935213	0.961044645	-2.098528205	0.000213513	0.009054412	BnaA01g02610D [Brassica napus]	-	-	GO:0016628//oxidoreductase activity, acting on the CH-CH group of donors, NAD or NADP as acceptor	-
ncbi_106354316	LOC106354316	2.08	5.52	5.39	2.22	2.07	1.77	1.57	2.07	8.18	3.94	2.02	4.33	1.100011732	0.001152707	0.044927112	-0.136171395	0.868923447	0.95027769	BnaA07g31100D [Brassica napus]	ko03022//Basal transcription factors	-	GO:0046914//transition metal ion binding	-
ncbi_106354360	LOC106354360	10.19	26.34	28.39	37.61	42.93	17.07	1.02	0.33	4.35	1.9	32.5367	21.64	-0.588365957	0.999919404	0.999975314	-3.509629175	9.83E-05	0.005009093	strictosidine synthase 3-like [Brassica rapa]	ko01100//Metabolic pathways;ko01110//Biosynthesis of secondary metabolites;ko00901//Indole alkaloid biosynthesis	-	GO:0046527//glucosyltransferase activity	-
ncbi_106354375	LOC106354375	7.96	5.02	4.79	3.23	3.48	2.76	12.43	25.87	17.3	18.5333	3.1567	5.9233	0.908007351	5.64E-06	0.000877063	1.645641202	1.22E-06	0.00017648	probable phosphoribosylformylglycinamidine synthase, chloroplastic/mitochondrial [Brassica rapa]	ko01100//Metabolic pathways;ko01110//Biosynthesis of secondary metabolites;ko00230//Purine metabolism	-	GO:0016884//carbon-nitrogen ligase activity, with glutamine as amido-N-donor	-
ncbi_106354381	LOC106354381	8.4	1.19	0.9	2.87	1.08	3.5	29.38	69.62	20.87	39.9567	2.4833	3.4967	0.493702347	0.376698043	0.954106559	3.514384056	2.25E-05	0.001682384	chaperone protein ClpB1 [Brassica rapa]	-	-	-	GO:0033554//cellular response to stress
ncbi_106354386	LOC106354386	4.28	2.42	2.18	4.14	2.52	3.82	4.82	8.4	6.96	6.7267	3.4933	2.96	-0.239007135	0.661522017	0.984859178	1.184294593	0.000768312	0.022288775	galactosyl transferase GMA12/MNN10 family protein [Arabidopsis lyrata subsp. lyrata]	-	-	-	GO:0048588//developmental cell growth
ncbi_106354395	LOC106354395	13.78	23.47	22.5	46.13	53.87	13.49	2.89	1.23	7.3	3.8067	37.83	19.9167	-0.925554564	0.53274276	0.984859178	-2.387376062	0.000630564	0.019323732	BnaA07g31590D [Brassica napus]	ko01100//Metabolic pathways;ko01110//Biosynthesis of secondary metabolites;ko00900//Terpenoid backbone biosynthesis;ko00860//Porphyrin metabolism	-	GO:0016627//oxidoreductase activity, acting on the CH-CH group of donors	-
ncbi_106354399	LOC106354399	3.14	7.89	6.5	9.61	12.47	5.88	0.59	0.13	1.65	0.79	9.32	5.8433	-0.673538365	0.813307281	0.984859178	-2.886867032	0.001329817	0.03222858	HVA22-like protein a [Brassica rapa]	-	GO:0043231//intracellular membrane-bounded organelle	-	-
ncbi_106354402	LOC106354402	1.18	0.82	0.76	3.91	5.65	2.32	0.7	1.28	0.41	0.7967	3.96	0.92	-2.105794664	0.000349917	0.019922459	-0.207657649	0.789351686	0.931552167	BnaA01g02620D [Brassica napus]	-	-	GO:0005515//protein binding	-
ncbi_106354425	LOC106354425	1.07	6.47	6.23	1.61	1.44	1	0.09	0.15	4.08	1.44	1.35	4.59	1.765534746	0.001202688	0.046303201	-1.672425342	1	1	phytoene synthase [Brassica napus]	ko01100//Metabolic pathways;ko01110//Biosynthesis of secondary metabolites;ko00906//Carotenoid biosynthesis	-	-	GO:0046471//phosphatidylglycerol metabolic process
ncbi_106354426	LOC106354426	1.13	2.73	3.04	2.85	5.67	1.22	0.36	0.18	0.41	0.3167	3.2467	2.3	-0.49732541	0.896642952	0.984859178	-2.860596943	0.000256952	0.01030897	BnaA02g03440D [Brassica napus]	ko00480//Glutathione metabolism	-	GO:0043167//ion binding	-
ncbi_106354455	BNAA02G03120D	9.54	3.63	2.6	4.26	2.45	6.69	16.11	20.53	19.37	18.67	4.4667	5.2567	0.234949659	0.420512016	0.970336831	1.828501768	0.000136536	0.00643351	BnaA02g03120D [Brassica napus]	-	GO:0043231//intracellular membrane-bounded organelle	-	-
ncbi_106354510	LOC106354510	7.01	5.93	5.66	5.37	5.54	5.19	7.96	14.72	14.72	12.4667	5.3667	6.2	0.208241933	0.018727049	0.261607914	1.007735649	0.000963533	0.025858414	S-adenosyl-L-methionine-dependent tRNA 4-demethylwyosine synthase [Brassica rapa]	-	-	GO:0051540//metal cluster binding	-
ncbi_106354554	LOC106354554	2.37	2.06	2.72	3.96	2.59	2.11	1.06	0.88	0.92	0.9533	2.8867	2.3833	-0.276423783	0.418442852	0.969629677	-1.321928095	0.000689546	0.020703764	BnaC06g38940D [Brassica napus]	ko01110//Biosynthesis of secondary metabolites;ko00900//Terpenoid backbone biosynthesis	-	GO:0016740//transferase activity	-
ncbi_106354573	LOC106354573	30.6	29.42	31.42	87.88	79.7	52.89	18.59	22.56	19.36	20.17	73.49	30.48	-1.269685049	3.01E-05	0.003312755	-0.595651819	0.003595402	0.06342902	ethylene-responsive transcription factor RAP2-4 [Brassica rapa]	-	GO:0043231//intracellular membrane-bounded organelle	-	-
ncbi_106354575	LOC106354575	30.11	15.68	15.15	11.19	4.91	21.5	57.82	82.25	50.41	63.4933	12.5333	20.3133	0.696656838	0.146202021	0.706693862	1.644178121	1.53E-06	0.000209521	BnaC06g38570D [Brassica napus]	-	-	-	-
ncbi_106354582	LOC106354582	0.07	0.05	0.06	1.39	0.38	0.44	0.1	0.04	0.19	0.11	0.7367	0.06	-3.617977558	0.000468834	0.024222019	0.874469118	0.424839644	0.822427346	BnaC06g38480D [Brassica napus]	-	GO:0031224//intrinsic component of membrane	-	-
ncbi_106354585	LOC106354585	0.28	3.78	3.01	13.95	13.25	0.55	0.05	0	0.03	0.0267	9.25	2.3567	-1.972705651	0.259708067	0.861502749	-6.465566405	4.95E-07	8.76E-05	plasma membrane sulphate transporter [Brassica oleracea var. viridis]	-	-	-	GO:0044763//single-organism cellular process
ncbi_106354601	LOC106354601	0.15	0.21	0.3	0	0.11	0	0	0	0	0	0.0367	0.22	2.584962501	0.045794844	0.420710505	-7.781359714	0.000233469	0.00964479	filament-like plant protein 1 [Brassica rapa]	-	-	-	-
ncbi_106354604	LOC106354604	4.85	3.46	4.13	1.46	1.3	3.03	9.24	8.38	9.52	9.0467	1.93	4.1467	1.103351232	0.01186932	0.200493027	1.125434235	1.52E-06	0.000209104	BnaC06g38160D [Brassica napus]	-	-	-	GO:0006952//defense response
ncbi_106354631	LOC106354631	7.97	17.58	18.26	4.84	3.96	5.28	8.11	9.81	22.95	13.6233	4.6933	14.6033	1.637612881	4.26E-05	0.004321702	-0.100217971	0.88531707	0.958098387	BnaA07g33280D [Brassica napus]	-	-	GO:0046872//metal ion binding	-
ncbi_106354648	LOC106354648	3.45	0.39	0.48	0.14	0.32	0.04	0.91	0.34	5.42	2.2233	0.1667	1.44	3.111031312	0.001351344	0.049783701	0.626655449	0.509647215	0.870273865	O-methyltransferase family 2 protein [Brassica napus]	-	-	GO:0008168//methyltransferase activity	-
ncbi_106354702	LOC106354702	11.45	8.59	7.77	37.09	31.29	15.64	5.33	4.69	10.12	6.7133	28.0067	9.27	-1.595129041	0.000254337	0.015928675	-0.465540061	0.347632723	0.76167854	BnaA07g34180D [Brassica napus]	-	-	GO:0051219//phosphoprotein binding	-
ncbi_106354732	LOC106354732	4.76	3.78	3.63	14.26	9	8.68	4.11	2.31	2.78	3.0667	10.6467	4.0567	-1.392035145	0.001170564	0.04545035	-0.403623402	0.404152298	0.806406485	WRKY11-1 transcription factor [Brassica napus]	-	GO:0043231//intracellular membrane-bounded organelle	-	-
ncbi_106354759	LOC106354759	19.57	32.64	32.36	40.99	39.05	14.93	8.99	6.63	14.55	10.0567	31.6567	28.19	-0.167325875	0.301299727	0.901284942	-1.487031282	0.001687643	0.037910774	BnaC04g07230D [Brassica napus]	ko01100//Metabolic pathways;ko01110//Biosynthesis of secondary metabolites;ko01200//Carbon metabolism;ko00620//Pyruvate metabolism;ko01212//Fatty acid metabolism;ko00061//Fatty acid biosynthesis;ko00640//Propanoate metabolism	-	GO:0016421//CoA carboxylase activity	-
ncbi_106354761	LOC106354761	16.55	21.34	22.55	79.32	92.83	32.48	6.99	2.27	8.09	5.7833	68.21	20.1467	-1.759442103	0.002646285	0.078748323	-1.800567998	0.002420375	0.048516403	BnaAnng40550D [Brassica napus]	ko01100//Metabolic pathways;ko00195//Photosynthesis	-	-	GO:0034285//response to disaccharide
ncbi_106354779	LOC106354779	8.87	10.09	9.36	30.69	25.52	15.18	3.84	2.31	6.01	4.0533	23.7967	9.44	-1.333900737	0.000962057	0.039703254	-1.219678037	0.010586179	0.123691566	BnaC06g39740D [Brassica napus]	-	-	-	GO:0070838//divalent metal ion transport
ncbi_106354801	LOC106354801	0.06	0	0	1.45	2.35	0.39	0.51	0.12	0	0.21	1.3967	0.02	-6.125843933	0.000389121	0.021339997	3.392317423	0.189506424	0.579137319	BnaC06g40000D [Brassica napus]	-	GO:0043231//intracellular membrane-bounded organelle	-	-
ncbi_106354832	LOC106354832	0.06	1.15	1.31	0	0	0	0	0	1.06	0.3533	0	0.84	9.714245518	2.00E-05	0.002393102	-1.249359469	0.551292603	0.884950531	BnaA07g35410D [Brassica napus]	-	-	-	-
ncbi_106354842	LOC106354842	2.11	10.62	11.68	2.38	2.17	2.41	3.29	1.12	7.2	3.87	2.32	8.1367	1.810313084	0.000834697	0.036195065	-1.072104323	0.220277204	0.621277152	BnaC06g40450D [Brassica napus]	-	GO:0043231//intracellular membrane-bounded organelle	-	-
ncbi_106355014	LOC106355014	0	0	0	0.45	0.06	0.14	0	0	0.09	0.03	0.2167	0	-7.759333407	0.001036496	0.041869659	4.906890596	0.348250462	0.761986069	retrotransposon protein [Beta vulgaris]	-	-	GO:0005488//binding	-
ncbi_106355278	LOC106355278	0.31	1.27	1.48	0	0.1	1.45	12.53	20.79	8.3	13.8733	0.5167	1.02	0.981263437	0.466499886	0.983150098	3.765673407	4.11E-08	1.16E-05	BnaA01g24950D [Brassica napus]	-	-	-	GO:0044763//single-organism cellular process
ncbi_106355310	LOC106355310	2.48	6.21	4.96	0.93	1.76	1.59	1.67	0.41	1.42	1.1667	1.4267	4.55	1.673218249	0.000463847	0.024040051	-1.963474124	0.007225411	0.098225921	BnaA07g12210D [Brassica napus]	-	GO:0043231//intracellular membrane-bounded organelle	-	-
ncbi_106355366	LOC106355366	9.3	20.24	14.39	53.51	57.59	13.27	3.54	0.89	3.52	2.65	41.4567	14.6433	-1.501360122	0.114973798	0.645859442	-2.466179734	0.000245594	0.00998934	oxygen-evolving enhancer protein 1-1, chloroplastic [Brassica rapa]	ko01100//Metabolic pathways;ko00195//Photosynthesis	-	-	GO:0048869//cellular developmental process
ncbi_106355376	LOC106355376	0.38	3.4	5.38	0	0	0	0.06	0.06	3.33	1.15	0	3.0533	11.57616938	9.67E-08	3.72E-05	-1.408751236	0.349762744	0.763333822	BnaC03g05070D [Brassica napus]	-	GO:0044444//cytoplasmic part	-	-
ncbi_106355382	LOC106355382	0.4	1.61	0.92	0.03	0.06	0.03	0	0	1.97	0.6567	0.04	0.9767	4.609794354	9.37E-07	0.000214112	-0.572705035	0.768163357	0.931552167	cytochrome P450 77A4 [Brassica rapa]	-	-	-	GO:0090567//reproductive shoot system development
ncbi_106355400	LOC106355400	0.72	0.81	0.35	2.44	2.47	2.68	0.61	0.71	0.56	0.6267	2.53	0.6267	-2.013367224	0.000758482	0.034247751	0	0.926279976	0.977356161	BnaC08g17450D [Brassica napus]	-	GO:0044444//cytoplasmic part	-	-
ncbi_106355621	LOC106355621	0.17	0.17	0.17	0.42	0.63	0.22	0.68	1	0.53	0.7367	0.4233	0.17	-1.316259345	0.314447546	0.909958028	2.115477217	0.000558219	0.017822296	calcium-transporting ATPase 10, plasma membrane-type-like isoform X2 [Brassica rapa]	-	-	-	GO:0072503//cellular divalent inorganic cation homeostasis
ncbi_106355701	LOC106355701	0.54	0.38	0.62	2.79	2.64	0.79	0	0	0	0	2.0733	0.5133	-2.013984229	0.029683409	0.338050518	-9.003752135	0.001389855	0.033248329	glutathione S-transferase T3-like [Brassica rapa]	-	-	-	-
ncbi_106356013	BNAC06G38650D	0.38	0.76	0.64	2.54	3.17	0.83	0	0	0	0	2.18	0.5933	-1.877413395	0.043871944	0.411687739	-9.212699025	8.08E-05	0.004320353	BnaC06g38650D [Brassica napus]	-	-	GO:0016741//transferase activity, transferring one-carbon groups	-
ncbi_106356127	BNAA07G01390D	9.51	2.78	4.38	2.56	2.97	8.94	14.77	22	19.41	18.7267	4.8233	5.5567	0.204189182	0.582496763	0.984859178	1.75280252	0.000244863	0.009969347	BnaA07g01390D [Brassica napus]	-	GO:0043231//intracellular membrane-bounded organelle	-	-
ncbi_106356141	LOC106356141	0.63	2.34	2.38	0	0	0.15	1.22	1.64	16.38	6.4133	0.05	1.7833	5.156504486	3.54E-05	0.003727117	1.846498002	1	1	BnaC09g06270D [Brassica napus]	-	-	-	GO:0044710//single-organism metabolic process
ncbi_106356219	LOC106356219	0	96.11	96.35	0	0	0	0.08	0.25	85.56	28.63	0	64.1533	15.96923661	0.001179658	0.045738515	-1.163996558	1	1	BnaC09g09750D [Brassica napus]	-	-	-	GO:0051234//establishment of localization
ncbi_106356258	LOC106356258	0.14	0	0	0	0	0.06	6.62	3.6	3.43	4.55	0.02	0.0467	1.222392421	0.725519748	0.984859178	6.607330314	1.56E-08	5.15E-06	ethylene-responsive transcription factor ERF098-like [Brassica rapa]	-	GO:0043231//intracellular membrane-bounded organelle	-	-
ncbi_106356289	LOC106356289	0.29	0.3	0.36	2.7	2.51	0.94	0.07	0	0.4	0.1567	2.05	0.3167	-2.694586992	0.000151864	0.010999307	-1.015266757	0.487435864	0.852226486	vacuolar-processing enzyme-like [Brassica rapa]	-	-	-	GO:0044707//single-multicellular organism process
ncbi_106356344	LOC106356344	0.81	0.29	0.34	0.94	0.22	0.23	1.47	2.93	1.28	1.8933	0.4633	0.48	0.050983929	0.460906311	0.980305435	1.979822118	0.001327052	0.032184106	BnaC07g10280D [Brassica napus]	-	GO:0043231//intracellular membrane-bounded organelle	-	-
ncbi_106356352	LOC106356352	35.18	46.77	43.67	154.45	111.75	79.99	14.79	7.31	26.63	16.2433	115.3967	41.8733	-1.462497877	0.000558321	0.027627445	-1.366184047	0.015809809	0.1565866	ribonuclease 3 [Brassica rapa]	-	-	-	GO:0090501//RNA phosphodiester bond hydrolysis
ncbi_106356425	LOC106356425	0.06	0	0.04	5.46	1.3	0.13	0.04	0	0	0.0133	2.2967	0.0333	-6.106432078	0.000377482	0.020869131	-1.321928095	0.809491385	0.931552167	cyclin-dependent kinase B2-2 [Brassica rapa]	-	-	-	GO:1902410//mitotic cytokinetic process
ncbi_106356433	LOC106356433	0.99	1.37	1.33	5.25	6.25	2.6	0.34	0.57	0.99	0.6333	4.7	1.23	-1.934002441	0.001197616	0.046151252	-0.957621398	0.128666795	0.481978187	BnaA07g11380D [Brassica napus]	-	GO:0031224//intrinsic component of membrane	-	-
ncbi_106356458	LOC106356458	3.96	0.7	0.59	78.71	1.01	4.02	0	0	0.04	0.0133	27.9133	1.75	-3.99552759	0.009959025	0.180932034	-7.036173613	1.16E-05	0.001013692	jasmonate O-methyltransferase-like [Brassica rapa]	ko01110//Biosynthesis of secondary metabolites;ko00592//alpha-Linolenic acid metabolism	-	-	GO:0051707//response to other organism
ncbi_106356495	LOC106356495	51.85	11.05	10.94	27.16	14.58	72.46	82.59	155.04	78.04	105.2233	38.0667	24.6133	-0.629088193	0.651194542	0.984859178	2.095942701	0.000819138	0.023224919	BnaC07g48560D [Brassica napus]	-	GO:0009536//plastid	-	-
ncbi_106356557	BNAC03G05210D	0.4	1.28	1.56	0.07	0	0	0	0	1.04	0.3467	0.0233	1.08	5.532495081	0.000189927	0.012931241	-1.639410285	0.3587597	0.77092867	BnaC03g05210D [Brassica napus]	-	GO:0016020//membrane	-	-
ncbi_106356560	LOC106356560	0.36	2.13	2.17	0	0	0	0	0	1.55	0.5167	0	1.5533	10.60115174	5.94E-06	0.000916179	-1.588061739	0.38646717	0.792544498	BnaC03g04950D [Brassica napus]	-	GO:0031224//intrinsic component of membrane	-	-
ncbi_106356561	LOC106356561	2.21	1.21	2	2.63	4.12	3.24	5.58	12.18	3.54	7.1	3.33	1.8067	-0.882191826	0.403915813	0.961517617	1.974488674	0.000665801	0.020188788	BnaCnng65730D [Brassica napus]	-	GO:0043231//intracellular membrane-bounded organelle	-	-
ncbi_106356562	LOC106356562	1.26	19.01	15.15	0.18	0.28	0.11	0	0	0.56	0.1867	0.19	11.8067	5.957458483	4.13E-11	7.36E-08	-5.982993575	0.006716399	0.094018696	BnaC03g04890D [Brassica napus]	-	-	-	-
ncbi_106356569	LOC106356569	0.13	0.17	0	5.38	1.86	0.76	0	0	0	0	2.6667	0.1	-4.736965594	0.000225121	0.014646769	-6.64385619	0.435256088	0.827243406	BnaC03g68050D [Brassica napus]	-	GO:0043231//intracellular membrane-bounded organelle	-	-
ncbi_106356577	LOC106356577	0.91	1.19	1.32	2.75	3.11	0.46	0	0.15	0.21	0.12	2.1067	1.14	-0.885928233	0.70676107	0.984859178	-3.247927513	0.000360008	0.013071927	BnaC09g51230D [Brassica napus]	-	GO:0044444//cytoplasmic part	-	-
ncbi_106356601	LOC106356601	8.06	42.36	45.08	54.27	68.66	18.72	6.85	2.46	4.92	4.7433	47.2167	31.8333	-0.568757963	0.933757085	0.988539448	-2.746565071	0.000290692	0.011266414	caffeic acid 3-O-methyltransferase-like isoform X1 [Brassica rapa]	-	GO:0044444//cytoplasmic part	-	-
ncbi_106356614	LOC106356614	0.16	0.34	0.21	2.78	1.23	0.89	0.06	0.06	0.21	0.11	1.6333	0.2367	-2.786890819	0.000773977	0.034566911	-1.105353	0.308062962	0.723769222	BnaA07g13630D [Brassica napus]	-	-	-	GO:0009832//plant-type cell wall biogenesis
ncbi_106356622	LOC106356622	13.61	3.5	4.03	5.8	2.42	11.36	33.58	39.41	29.57	34.1867	6.5267	7.0467	0.110594612	0.638971038	0.984859178	2.278420885	1.50E-05	0.001235219	lactoylglutathione lyase-like [Camelina sativa]	-	-	GO:0003824//catalytic activity	-
ncbi_106356678	LOC106356678	0.19	0.35	0.28	2.59	2.4	0.39	0	0	0	0	1.7933	0.2733	-2.713910358	0.005051855	0.119134609	-8.094517599	0.000228389	0.009490725	BnaA07g15290D [Brassica napus]	-	-	GO:0016746//transferase activity, transferring acyl groups	-
ncbi_106356761	LOC106356761	1.05	0.07	0.11	55.87	4.6	0.65	0	0	0	0	20.3733	0.41	-5.634914323	0.000282022	0.017254228	-8.6794801	0.00762677	0.101204164	UDP-arabinopyranose mutase 3 [Brassica rapa]	ko00520//Amino sugar and nucleotide sugar metabolism	-	GO:0035251//UDP-glucosyltransferase activity	-
ncbi_106356779	LOC106356779	154.28	77.17	75.25	41.78	29.08	85.07	200.11	272.51	257.12	243.2467	51.9767	102.2333	0.975929646	0.040484381	0.395977596	1.250554369	9.49E-05	0.004894359	universal stress protein family protein [Arabidopsis lyrata subsp. lyrata]	-	GO:0044424//intracellular part	-	-
ncbi_106356821	LOC106356821	0.58	0.63	0.47	0.98	0.71	0.15	0.09	0.03	0.12	0.08	0.6133	0.56	-0.131244533	0.471039537	0.984648816	-2.807354922	0.001497395	0.035118543	F-box protein At3g59000-like [Brassica rapa]	-	-	-	-
ncbi_106356828	LOC106356828	3.54	19.34	20.83	0.57	0.28	1.16	1.9	0.77	11.86	4.8433	0.67	14.57	4.442695972	7.53E-08	3.03E-05	-1.588928675	0.134371833	0.491899709	protein YLS3-like [Brassica rapa]	-	GO:0031224//intrinsic component of membrane	-	-
ncbi_106356863	LOC106356863	4.59	13.57	11.98	23.21	31.39	14.86	0.45	0.03	0.41	0.2967	23.1533	10.0467	-1.204502994	0.220479336	0.823200814	-5.081730271	2.42E-09	1.07E-06	fasciclin-like arabinogalactan protein 10 [Brassica rapa]	-	-	-	GO:0071555//cell wall organization
ncbi_106356872	LOC106356872	0.7	0.87	0.84	8.19	1.38	1	0.07	0	0.1	0.0567	3.5233	0.8033	-2.132870325	0.059904428	0.482777446	-3.825426495	1.71E-05	0.001361785	BnaA07g19170D [Brassica napus]	ko00970//Aminoacyl-tRNA biosynthesis	GO:0044444//cytoplasmic part	-	-
ncbi_106356890	LOC106356890	16.63	42.28	36.15	81.27	71.16	36.29	3.21	0.62	8.1	3.9767	62.9067	31.6867	-0.989337017	0.386247985	0.957931823	-2.994244359	0.000551902	0.017708941	bifunctional aspartate aminotransferase and glutamate/aspartate-prephenate aminotransferase-like [Brassica rapa]	-	-	GO:0070546//L-phenylalanine aminotransferase activity	-
ncbi_106356905	BNAA07G20410D	3.22	1.57	1.37	3	1.04	5.29	4.48	8.76	15.75	9.6633	3.11	2.0533	-0.59894673	0.755479229	0.984859178	2.234553077	0.000498182	0.016502835	BnaC06g39650D [Brassica napus]	-	GO:0044424//intracellular part	-	-
ncbi_106356941	LOC106356941	70.92	22.77	21.71	14.03	2.39	64.82	80.8	134.75	193.53	136.36	27.08	38.4667	0.506381079	0.540576244	0.984859178	1.825739781	0.000589774	0.018459414	alcohol dehydrogenase class-P-like isoform X1 [Brassica rapa]	ko01100//Metabolic pathways;ko01110//Biosynthesis of secondary metabolites;ko00010//Glycolysis / Gluconeogenesis;ko00071//Fatty acid degradation;ko00592//alpha-Linolenic acid metabolism;ko00350//Tyrosine metabolism	-	GO:0046914//transition metal ion binding	-
ncbi_106357013	LOC106357013	0.9	1	0.59	0.11	0.16	0.23	2.27	1.33	2.49	2.03	0.1667	0.83	2.316145742	0.000349114	0.019890526	1.290296486	0.009905726	0.118982157	BnaA07g16310D [Brassica napus]	-	GO:0044459//plasma membrane part	-	-
ncbi_106357035	LOC106357035	0.07	0	0	1.91	0.85	0.29	0	0	0	0	1.0167	0.0233	-5.44531051	0.001189938	0.046006629	-4.544320516	0.663940077	0.913487456	cinnamyl alcohol dehydrogenase 5 [Brassica rapa]	ko01100//Metabolic pathways;ko01110//Biosynthesis of secondary metabolites;ko00940//Phenylpropanoid biosynthesis	-	-	GO:0046942//carboxylic acid transport
ncbi_106357073	LOC106357073	2.19	3.95	4.14	11.44	6.31	2.96	0.2	0.02	0.22	0.1467	6.9033	3.4267	-1.010487289	0.459950609	0.979927365	-4.546192931	1.44E-09	7.15E-07	BnaC06g01870D [Brassica napus]	-	-	-	GO:0046942//carboxylic acid transport
ncbi_106357116	LOC106357116	7.75	4.28	4.17	45.41	23.66	28.3	1.35	0.88	8.42	3.55	32.4567	5.4	-2.587483529	7.26E-08	2.95E-05	-0.605140383	0.559303474	0.885732823	calcium-binding protein CML24 [Brassica rapa]	ko04626//Plant-pathogen interaction	-	-	GO:0051171//regulation of nitrogen compound metabolic process
ncbi_106357194	LOC106357194	1.64	1.27	1.22	2.13	1.35	2.39	2.75	2.45	3.31	2.8367	1.9567	1.3767	-0.507218722	0.873996654	0.984859178	1.04301735	0.001364563	0.032825081	BnaA07g27990D [Brassica napus]	-	-	-	-
ncbi_106357198	LOC106357198	3.42	1.08	1.67	0.37	0.12	1.2	4.34	6.55	6.47	5.7867	0.5633	2.0567	1.868247243	0.029852456	0.339065425	1.492424553	0.001090498	0.02806452	MADS-box protein AGL24 isoform X2 [Brassica rapa]	-	GO:0043231//intracellular membrane-bounded organelle	-	-
ncbi_106357205	LOC106357205	0.15	1.44	1.37	0.17	0.1	0	0.33	0.07	0.07	0.1567	0.09	0.9867	3.454565863	0.000794045	0.035005809	-2.654864514	0.025345104	0.203710211	vacuolar cation/proton exchanger 5-like isoform X3 [Brassica rapa]	-	-	-	GO:0044763//single-organism cellular process
ncbi_106357239	LOC106357239	0.1	0.09	0	1.04	1.58	0.97	0.3	0.1	0	0.1333	1.1967	0.0633	-4.23991252	6.87E-05	0.006125724	1.074000581	0.610285975	0.913487456	serine carboxypeptidase-like 2 isoform X1 [Brassica rapa]	-	-	-	GO:0016485//protein processing
ncbi_106357266	LOC106357266	0.07	2.35	2.12	0.16	0.25	0.06	0.09	0.07	0.96	0.3733	0.1567	1.5133	3.271959636	0.000638888	0.030204135	-2.019193565	0.131535002	0.486464266	tip elongation aberrant protein 1 isoform X2 [Brassica rapa]	-	-	-	-
ncbi_106357302	LOC106357302	6.03	7	8.45	1.34	1.67	3.99	13.11	15.94	20.14	16.3967	2.3333	7.16	1.617567166	0.003558326	0.095031169	1.195371062	0.000269409	0.010626968	BnaAnng09170D [Brassica napus]	-	GO:0043231//intracellular membrane-bounded organelle	-	-
ncbi_106357318	LOC106357318	0.04	0.11	0.08	0.78	1.3	0.7	0	0	0.04	0.0133	0.9267	0.0767	-3.595379117	0.000809116	0.035460616	-2.523561956	0.285924025	0.700016852	BnaC06g38960D [Brassica napus]	-	-	GO:0032550//purine ribonucleoside binding	-
ncbi_106357320	LOC106357320	0.69	0.67	0.88	16.42	6.55	1.84	0.03	0.06	0	0.03	8.27	0.7467	-3.469351098	3.52E-05	0.00370832	-4.637429921	2.21E-05	0.001659202	BnaC06g38930D [Brassica napus]	-	-	-	-
ncbi_106357339	LOC106357339	0.08	0	0	0	0	0	0.5	1.28	0.53	0.77	0	0.0267	4.736965594	0.710924142	0.984859178	4.851749041	0.000351365	0.01288009	BnaC06g38450D [Brassica napus]	-	GO:0044444//cytoplasmic part	-	-
ncbi_106357373	LOC106357373	0.1	0.06	0.06	3.72	0.59	0.32	0.03	0	0	0.01	1.5433	0.0733	-4.395436765	0.000992367	0.040606859	-2.874469118	0.216431747	0.616049185	BnaA07g39150D [Brassica napus]	-	-	-	-
ncbi_106357401	BNAA01G05030D	92.81	79.68	81.2	11.86	20.98	103	177.96	194.4	173.81	182.0567	45.28	84.5633	0.901158288	1	1	1.10628342	1.82E-12	2.08E-09	BnaC03g67360D [Brassica napus]	-	-	-	-
ncbi_106357402	LOC106357402	0.38	0.83	0.52	16.03	8.15	0.8	0.23	0	0	0.0767	8.3267	0.5767	-3.851929534	0.000902753	0.037923481	-2.911066272	0.096896906	0.417728182	early nodulin-like protein 1 [Brassica rapa]	-	-	-	GO:1902410//mitotic cytokinetic process
ncbi_106357460	LOC106357460	0.08	6.41	8.68	0	0.14	0.57	0.22	0.3	0.22	0.2467	0.2367	5.0567	4.417258251	0.003455772	0.093540707	-4.357552005	0.000766669	0.022274383	UPF0540 protein At1g62000-like [Brassica rapa]	-	-	-	-
ncbi_106357504	LOC106357504	0	0.72	1.12	0	0	0	0	0.05	0.72	0.2567	0	0.6133	9.26052755	0.000902645	0.037923481	-1.256775415	0.52084883	0.877302975	probable ATP-dependent RNA helicase DHX35 isoform X2 [Jatropha curcas]	-	-	GO:0042623//ATPase activity, coupled	-
ncbi_106357527	LOC106357527	0.27	0.45	0.43	4.01	1.33	4.31	0	0	0.46	0.1533	3.2167	0.3833	-3.068895081	0.000370593	0.020711568	-1.321928095	0.499960742	0.861929792	BnaC07g00080D [Brassica napus]	-	GO:0044444//cytoplasmic part	-	-
ncbi_106357545	LOC106357545	6.34	2.23	2.21	2.48	2.71	3.64	26.93	28.88	27.67	27.8267	2.9433	3.5933	0.287871835	0.262258185	0.864981962	2.953073422	1.92E-11	1.69E-08	BnaA07g00460D [Brassica napus]	ko01110//Biosynthesis of secondary metabolites;ko01210//2-Oxocarboxylic acid metabolism;ko00380//Tryptophan metabolism;ko00966//Glucosinolate biosynthesis	-	-	GO:0048364//root development
ncbi_106357564	LOC106357564	0.4	0.17	0.22	0.4	0.4	0.25	0	0	0	0	0.35	0.2633	-0.410464769	0.9176093	0.984859178	-8.040746342	0.001900234	0.041278979	BnaAnng30480D [Brassica napus]	-	-	-	-
ncbi_106357581	LOC106357581	179.19	103.95	97.18	39.71	20.73	162.18	260.41	262.04	292.92	271.79	74.2067	126.7733	0.772630599	1	1	1.100241068	5.77E-05	0.003376057	NADP-dependent malic enzyme 1 [Brassica rapa]	ko01100//Metabolic pathways;ko01200//Carbon metabolism;ko00620//Pyruvate metabolism;ko00710//Carbon fixation in photosynthetic organisms	-	-	GO:0051603//proteolysis involved in cellular protein catabolic process
ncbi_106357615	LOC106357615	8.35	3.69	4.01	6.07	5.77	6.1	27.04	77.26	5.49	36.5967	5.98	5.35	-0.160606593	0.558382181	0.984859178	2.774101453	0.000754783	0.022060949	18.5 kDa class IV heat shock protein isoform X1 [Brassica rapa]	-	GO:0044424//intracellular part	-	-
ncbi_106357633	LOC106357633	0.83	0.22	0.23	1.04	0.48	0.66	1.62	3.45	0.96	2.01	0.7267	0.4267	-0.768184325	0.684041291	0.984859178	2.236014192	0.001725814	0.038556559	BnaA07g01250D [Brassica napus]	-	-	GO:0060089//molecular transducer activity	-
ncbi_106357643	LOC106357643	0.04	1.4	1.1	0	0	0	0	0.04	1.13	0.39	0	0.8467	9.725650281	0.000102543	0.008247949	-1.118319967	0.538271712	0.884950531	BnaC09g06360D [Brassica napus]	ko03440//Homologous recombination	GO:0043231//intracellular membrane-bounded organelle	-	-
ncbi_106357645	LOC106357645	0.05	2.43	2.91	0.05	0.02	0.05	0.09	0.05	4	1.38	0.04	1.7967	5.489178962	4.43E-05	0.004433435	-0.380654505	0.80263183	0.931552167	BnaC09g06340D [Brassica napus]	ko01100//Metabolic pathways;ko00240//Pyrimidine metabolism;ko00410//beta-Alanine metabolism;ko00770//Pantothenate and CoA biosynthesis	GO:0044444//cytoplasmic part	-	-
ncbi_106357650	LOC106357650	0.1	2.75	2.96	0.05	0.02	0.09	0	0.05	2.29	0.78	0.0533	1.9367	5.182394353	7.29E-06	0.001073927	-1.312029634	1	1	BnaC09g06300D [Brassica napus]	-	-	-	GO:0051707//response to other organism
ncbi_106357651	LOC106357651	1.29	6.05	5.55	2.25	0.69	0.87	0.55	0.96	6.78	2.7633	1.27	4.2967	1.758389361	0.000807243	0.035397448	-0.636808257	0.524618272	0.879161339	BnaC09g06280D [Brassica napus]	-	GO:0043231//intracellular membrane-bounded organelle	-	-
ncbi_106357654	LOC106357654	0	4.57	4.62	0.05	0.06	0.06	0	0.1	4.01	1.37	0.0567	3.0633	5.75645821	6.29E-05	0.005724191	-1.160926468	1	1	BnaC09g06220D [Brassica napus]	-	GO:0016020//membrane	-	-
ncbi_106357655	LOC106357655	0.23	11.75	12.4	0.04	0.03	0.11	0.11	0.08	23.3	7.83	0.06	8.1267	7.081557409	1.63E-08	9.28E-06	-0.053651413	1	1	BnaC09g06200D [Brassica napus]	ko01100//Metabolic pathways;ko04070//Phosphatidylinositol signaling system;ko00562//Inositol phosphate metabolism;ko00920//Sulfur metabolism	-	GO:0052745//inositol phosphate phosphatase activity	-
ncbi_106357657	BNAC09G06230D	0	5.1	6.01	0.06	0.06	0	0.07	0.07	6.75	2.2967	0.04	3.7033	6.532680601	0.000145457	0.010683756	-0.689282929	0.717072527	0.931552167	BnaC09g06230D [Brassica napus]	-	GO:0043231//intracellular membrane-bounded organelle	-	-
ncbi_106357661	LOC106357661	0.09	0.67	0.83	0.05	0.05	0.03	0.06	0.13	0.81	0.3333	0.0433	0.53	3.612443237	0.000578953	0.028306946	-0.669026766	0.586345082	0.906092731	BnaC09g07900D [Brassica napus]	-	GO:0043231//intracellular membrane-bounded organelle	-	-
ncbi_106357665	LOC106357665	0.51	1.1	1.8	0	0.06	0.07	0	0	0.34	0.1133	0.0433	1.1367	4.713188211	0.000164654	0.011675603	-3.326165088	0.027753258	0.214616845	pathogenesis-related protein PRB1-3 precursor [Zea mays]	-	-	-	-
ncbi_106357671	LOC106357671	12.32	39.77	36.49	71.75	77.07	14.35	2.08	1.78	6.25	3.37	54.39	29.5267	-0.881322929	0.734248918	0.984859178	-3.131198	1.01E-05	0.00091745	BnaC09g07990D [Brassica napus]	ko01100//Metabolic pathways;ko00195//Photosynthesis	-	-	GO:0048869//cellular developmental process
ncbi_106357688	LOC106357688	1.15	0.91	0.42	2.91	4.29	0.66	0.18	0.14	0.1	0.14	2.62	0.8267	-1.664189192	0.131264415	0.68023503	-2.561878888	0.001539831	0.035757837	BnaC03g60120D [Brassica napus]	-	-	-	GO:0071555//cell wall organization
ncbi_106357692	LOC106357692	514.61	380.72	364.29	70.81	36.11	333.33	923.33	780.03	904.15	869.17	146.75	419.8733	1.51659366	0.051252253	0.447404346	1.049684216	2.70E-06	0.000332835	peptidyl-prolyl cis-trans isomerase CYP18-3 [Brassica rapa]	-	-	-	GO:0048511//rhythmic process
ncbi_106357752	BNAA07G04280D	9.91	15.09	14.62	61.29	75.68	22.8	1.94	1.76	2.76	2.1533	53.2567	13.2067	-2.011695754	0.001673934	0.0578738	-2.61662281	4.46E-09	1.81E-06	photosystem II subunit X [Arabidopsis thaliana]	-	-	-	GO:0044237//cellular metabolic process
ncbi_106357806	LOC106357806	0.46	0.55	0.66	3.82	2.05	3	1.11	1.29	0.46	0.9533	2.9567	0.5567	-2.409086002	0.000205474	0.01373895	0.776167044	0.221504716	0.622772601	calcium-dependent lipid-binding (CaLB domain) family protein [Brassica napus]	-	GO:0044444//cytoplasmic part	-	-
ncbi_106357811	LOC106357811	0.2	2.24	1.85	0.2	0.08	0.05	0.2	0.16	3.22	1.1933	0.11	1.43	3.700439718	2.43E-05	0.00278063	-0.26101806	0.837611026	0.937422789	BnaC09g09730D [Brassica napus]	-	GO:0043231//intracellular membrane-bounded organelle	-	-
ncbi_106357824	LOC106357824	4.79	16.71	16.04	5.07	4.18	4.49	5	5.41	16.92	9.11	4.58	12.5133	1.450046646	0.000626626	0.029803051	-0.45794319	0.525921639	0.880257253	BnaC09g09630D [Brassica napus]	-	-	GO:0046914//transition metal ion binding	-
ncbi_106357831	LOC106357831	10.15	17.49	18.39	56.56	120.4	13.95	0.92	0.46	0.85	0.7433	63.6367	15.3433	-2.052246326	0.037244442	0.377739599	-4.367458827	1.24E-16	3.45E-13	chlorophyll a-b binding protein 1, chloroplastic [Brassica rapa]	ko01100//Metabolic pathways;ko00196//Photosynthesis - antenna proteins	-	GO:0046906//tetrapyrrole binding	-
ncbi_106357833	LOC106357833	22.47	44.72	44.49	307.47	594.45	85.17	2.09	1.21	5.91	3.07	329.03	37.2267	-3.143810785	0.000105668	0.008433175	-3.60002588	1.39E-07	3.14E-05	chlorophyll a-b binding protein 1, chloroplastic [Brassica rapa]	ko01100//Metabolic pathways;ko00196//Photosynthesis - antenna proteins	-	GO:0046906//tetrapyrrole binding	-
ncbi_106357855	LOC106357855	3.89	5.96	6.49	12.83	17.52	3.63	1.51	1.16	1.4	1.3567	11.3267	5.4467	-1.056277869	0.438228968	0.978474711	-2.005307284	4.20E-05	0.002654816	BnaAnng19070D [Brassica napus]	-	-	GO:0016740//transferase activity	-
ncbi_106357857	LOC106357857	3.89	5.96	6.49	12.83	17.52	3.63	1.51	1.16	1.4	1.3567	11.3267	5.4467	-1.056277869	0.438228968	0.978474711	-2.005307284	4.20E-05	0.002654816	BnaAnng19070D [Brassica napus]	-	-	GO:0016740//transferase activity	-
ncbi_106357874	LOC106357874	7.21	2.35	1.99	2.56	3.01	1.76	18.47	31.88	14.2	21.5167	2.4433	3.85	0.656007748	0.061199312	0.48842882	2.482524244	8.32E-06	0.000784213	BnaA07g06370D [Brassica napus]	-	GO:0044444//cytoplasmic part	-	-
ncbi_106357909	LOC106357909	0.95	0.09	0.2	0.88	0.24	0.17	1.87	4.91	1.52	2.7667	0.43	0.4133	-0.057030945	0.676706183	0.984859178	2.742771216	0.001571864	0.036195705	gibberellin 2-beta-dioxygenase 2-like isoform X2 [Brassica rapa]	ko01110//Biosynthesis of secondary metabolites;ko00904//Diterpenoid biosynthesis	-	GO:0046914//transition metal ion binding	-
ncbi_106357992	LOC106357992	0.81	2.03	1.89	2.23	2.28	1.06	0.21	0.35	0.27	0.2767	1.8567	1.5767	-0.235837144	0.537476912	0.984859178	-2.510656942	0.000236079	0.009706211	BnaC09g15060D [Brassica napus]	-	-	-	GO:0044267//cellular protein metabolic process
ncbi_106357995	LOC106357995	27.19	53.76	49.96	118.93	102.42	57.88	10.48	5.34	15.47	10.43	93.0767	43.6367	-1.092878644	0.186453974	0.775171955	-2.064801743	0.000221353	0.009273711	BnaC09g15080D [Brassica napus]	ko00480//Glutathione metabolism	GO:0044424//intracellular part	-	-
ncbi_106358043	LOC106358043	105.75	62.86	57.3	69.46	50.41	72.01	146.54	178.15	184.41	169.7	63.96	75.3033	0.235543789	0.099590737	0.607853965	1.172200932	1.74E-05	0.001373749	BnaC07g11810D [Brassica napus]	-	GO:0031225//anchored component of membrane	-	-
ncbi_106358080	LOC106358080	1.23	1.2	0.92	0.29	0.34	0.72	2.85	2.31	1.94	2.3667	0.45	1.1167	1.311201688	0.009193522	0.172639993	1.083657929	0.001227839	0.030450021	U-box domain-containing protein 6-like [Brassica rapa]	-	-	-	GO:0032446//protein modification by small protein conjugation
ncbi_106358094	LOC106358094	4.63	1.41	1.3	3.54	2.49	1.54	8.59	21.68	4.88	11.7167	2.5233	2.4467	-0.044513237	0.451925876	0.979771144	2.259672721	0.001229233	0.030474862	BnaA07g09350D [Brassica napus]	-	-	GO:0046914//transition metal ion binding	-
ncbi_106358096	LOC106358096	0.97	0.66	1.06	3.17	6.73	0.37	0	0	0.06	0.02	3.4233	0.8967	-1.932758104	0.13006348	0.677688918	-5.486499862	2.31E-05	0.001712869	BnaA07g09400D [Brassica napus]	-	-	-	-
ncbi_106358121	LOC106358121	28.32	44.28	45.62	81.88	72.86	38.54	13.21	8.42	19.19	13.6067	64.4267	39.4067	-0.709218234	0.648038641	0.984859178	-1.534126038	0.001990695	0.042566161	ARF GTPase family protein [Arabidopsis thaliana]	ko04144//Endocytosis	-	GO:0060229//lipase activator activity	-
ncbi_106358136	LOC106358136	0.79	1.61	1.74	11.59	18.1	2.41	0.11	0	0.05	0.0533	10.7	1.38	-2.954870625	0.001289949	0.048368953	-4.693486957	6.15E-05	0.003559438	21 kDa protein-like [Brassica rapa]	-	-	GO:0052689//carboxylic ester hydrolase activity	-
ncbi_106358141	LOC106358141	1.13	3.55	3.8	2.99	5.02	0.67	0.1	0.11	0	0.07	2.8933	2.8267	-0.033630778	0.44765922	0.979771144	-5.335603032	6.10E-07	0.000101112	BnaC08g05370D [Brassica napus]	-	-	-	-
ncbi_106358156	LOC106358156	16.33	10.17	12.37	5.37	7.1	14.12	27.77	30.72	19.62	26.0367	8.8633	12.9567	0.54777333	0.148164698	0.710565661	1.006850153	0.000572012	0.018078287	BnaC03g39790D [Brassica napus]	ko01100//Metabolic pathways;ko00730//Thiamine metabolism	-	-	-
ncbi_106358172	LOC106358172	0	1.58	1.85	0.16	0	0	0	0	0	0	0.0533	1.1433	4.422064766	0.010277107	0.18433858	-10.15903036	0.002193188	0.045555379	-	-	-	-	-
ncbi_106358178	LOC106358178	14.57	7.56	6.57	6.72	2.03	15.56	24.54	29.32	17.4	23.7533	8.1033	9.5667	0.239500844	0.53337686	0.984859178	1.312041747	0.000384899	0.013697957	UDP-glycosyltransferase 85A1-like [Brassica rapa]	ko01100//Metabolic pathways;ko01110//Biosynthesis of secondary metabolites	-	GO:0035251//UDP-glucosyltransferase activity	-
ncbi_106358189	LOC106358189	1.49	4.65	5.14	62.37	22.86	4.46	0.05	0	0.21	0.0867	29.8967	3.76	-2.991180073	0.006010512	0.132965878	-5.439111634	1.75E-07	3.83E-05	leafy cotyledon 1 transcription factor [Brassica napus]	-	-	GO:0046983//protein dimerization activity	-
ncbi_106358193	BNAANNG40570D	0.88	0.92	1.17	6.82	9.33	2.18	0.07	0	0.2	0.09	6.11	0.99	-2.62567195	0.000717707	0.032898748	-3.459431619	0.003609639	0.063622437	BnaAnng40570D [Brassica napus]	-	GO:0031976//plastid thylakoid	-	-
ncbi_106358233	LOC106358233	0.67	0.86	0.38	11.72	4.36	4.76	0.13	0	1.22	0.45	6.9467	0.6367	-3.447710734	1.76E-07	5.96E-05	-0.500613231	0.73839876	0.931552167	cold-regulated protein [Brassica napus]	-	GO:0044444//cytoplasmic part	-	-
ncbi_106358243	LOC106358243	0.67	0.86	0.38	11.72	4.36	4.76	0.13	0	1.22	0.45	6.9467	0.6367	-3.447710734	1.76E-07	5.96E-05	-0.500613231	0.73839876	0.931552167	cold-regulated protein [Brassica napus]	-	GO:0044444//cytoplasmic part	-	-
ncbi_106358259	LOC106358259	2.11	4.83	4.69	7.72	10.23	2.28	0.51	0.26	1.19	0.6533	6.7433	3.8767	-0.798645223	0.766195377	0.984859178	-2.568925537	0.000452356	0.01535109	BnaAnng14750D [Brassica napus]	ko01100//Metabolic pathways;ko00195//Photosynthesis	-	-	GO:0050832//defense response to fungus
ncbi_106358261	LOC106358261	8.87	7.09	6.34	12.62	0.45	0.21	0.09	0.27	0.42	0.26	4.4267	7.4333	0.747788563	1	1	-4.837425776	4.02E-19	1.84E-15	probable fructose-bisphosphate aldolase 2, chloroplastic [Brassica rapa]	ko01100//Metabolic pathways;ko01110//Biosynthesis of secondary metabolites;ko01200//Carbon metabolism;ko01230//Biosynthesis of amino acids;ko00010//Glycolysis / Gluconeogenesis;ko00710//Carbon fixation in photosynthetic organisms;ko00051//Fructose and mannose metabolism;ko00030//Pentose phosphate pathway	-	-	GO:0048869//cellular developmental process
ncbi_106358277	LOC106358277	3.11	6.64	5.79	16.44	6.51	3.53	0.69	0.14	1.65	0.8267	8.8267	5.18	-0.768916618	0.842893234	0.984859178	-2.647574478	0.002176672	0.045297026	BnaA07g11760D [Brassica napus]	-	GO:0031301//integral component of organelle membrane	-	-
ncbi_106358283	LOC106358283	0.57	0.21	0.2	0.46	0.41	0.47	1.05	0.93	0.98	0.9867	0.4467	0.3267	-0.451379346	0.959848661	0.992574349	1.594743522	0.00169734	0.03804067	BnaA07g11740D [Brassica napus]	-	GO:0044424//intracellular part	-	-
ncbi_106358285	LOC106358285	3.11	6.64	5.79	16.44	6.51	3.53	0.69	0.14	1.65	0.8267	8.8267	5.18	-0.768916618	0.842893234	0.984859178	-2.647574478	0.002176672	0.045297026	BnaA07g11760D [Brassica napus]	-	GO:0031301//integral component of organelle membrane	-	-
ncbi_106358293	LOC106358293	1.7	1.68	1.16	4.75	4.11	2.51	0.09	0.09	0.17	0.1167	3.79	1.5133	-1.324468052	0.024277537	0.302201313	-3.69726547	1.25E-06	0.000180056	LOB domain-containing protein 37-like [Brassica rapa]	-	-	-	GO:0015698//inorganic anion transport
ncbi_106358307	LOC106358307	2.1	0.85	0.49	0.26	0.09	2.19	6.56	7.39	4.73	6.2267	0.8467	1.1467	0.437580068	0.649420658	0.984859178	2.441013985	5.91E-06	0.000602611	cytochrome P450 81D1-like [Brassica rapa]	-	-	GO:0046914//transition metal ion binding	-
ncbi_106358309	LOC106358309	0	0.23	0.12	0	0.06	0.24	4.64	8.24	3.11	5.33	0.1	0.1167	0.222392421	0.813051153	0.984859178	5.513671207	6.49E-10	3.71E-07	BnaA01g24950D [Brassica napus]	-	-	-	GO:0044763//single-organism cellular process
ncbi_106358316	LOC106358316	0.28	0.37	0.29	0.37	0.22	0.06	0	0	0	0	0.2167	0.3133	0.532221039	0.171701158	0.753188158	-8.291554446	0.000897568	0.024667088	probable trehalose-phosphate phosphatase I isoform X1 [Brassica rapa]	ko01100//Metabolic pathways;ko00500//Starch and sucrose metabolism	-	GO:0019203//carbohydrate phosphatase activity	-
ncbi_106358337	LOC106358337	1.64	3.06	3.53	3.6	4.55	1.25	0.52	0.45	0.9	0.6233	3.1333	2.7433	-0.191768326	0.472256121	0.984859178	-2.137854161	0.00042223	0.014583354	BnaA07g37480D [Brassica napus]	-	-	GO:0032550//purine ribonucleoside binding	-
ncbi_106358362	LOC106358362	3.68	4.06	4.15	9.45	14.35	3.7	0.73	0.31	0.88	0.64	9.1667	3.9633	-1.209682904	0.195434698	0.789743105	-2.630570499	4.47E-06	0.000492434	BnaA07g12150D [Brassica napus]	-	-	GO:0060089//molecular transducer activity	-
ncbi_106358392	LOC106358392	2.21	5.03	5.26	7.55	11.56	4.24	0.39	0.1	0.56	0.35	7.7833	4.1667	-0.901494455	0.520823709	0.984859178	-3.573466862	1.16E-06	0.000171065	BnaC05g00240D [Brassica napus]	-	-	-	GO:0044092//negative regulation of molecular function
ncbi_106358424	LOC106358424	4.43	10.3	9.73	29.89	35.26	9.88	2.49	1.86	2.15	2.1667	25.01	8.1533	-1.617043154	0.070519399	0.521652312	-1.911912781	0.00064724	0.019725325	BnaC05g31270D [Brassica napus]	-	-	-	GO:0042254//ribosome biogenesis
ncbi_106358459	LOC106358459	0.61	0.65	0.62	1.02	1.19	0.39	0.06	0.1	0.12	0.0933	0.8667	0.6267	-0.467778961	0.831149231	0.984859178	-2.74723393	2.66E-05	0.00190162	LOW QUALITY PROTEIN: probable inactive receptor kinase At2g26730 [Brassica rapa]	-	-	-	GO:0071555//cell wall organization
ncbi_106358477	LOC106358477	9.04	6.17	5.99	5.61	4.81	4.32	11.27	20.07	11.13	14.1567	4.9133	7.0667	0.52432774	0.000156528	0.011245187	1.002379844	0.001527126	0.035570681	BnaA07g12640D [Brassica napus]	-	-	-	-
ncbi_106358494	LOC106358494	1.08	0.36	0.36	0.89	0.23	0.94	1.37	2.64	1.73	1.9133	0.6867	0.6	-0.194647431	0.816454703	0.984859178	1.67305383	0.001699648	0.038070458	protein DA1-related 6-like [Brassica rapa]	-	-	-	-
ncbi_106358506	LOC106358506	2.98	9.82	11.02	1.83	1.19	1.16	1.22	0.7	9.5	3.8067	1.3933	7.94	2.510598566	5.09E-07	0.000128449	-1.060610763	0.301207224	0.71618931	BnaC03g05250D [Brassica napus]	ko00250//Alanine, aspartate and glutamate metabolism	-	GO:0046914//transition metal ion binding	-
ncbi_106358507	LOC106358507	0.72	1.48	1.02	0.03	0	0	0.03	0.06	1.46	0.5167	0.01	1.0733	6.745954377	6.26E-08	2.61E-05	-1.054792473	0.437132541	0.827243406	U-box domain-containing protein 51 [Brassica rapa]	-	-	-	GO:0050896//response to stimulus
ncbi_106358508	LOC106358508	0.29	3.43	3.53	0.02	0.02	0.02	0.05	0	2.92	0.99	0.02	2.4167	6.916874684	1.33E-08	7.77E-06	-1.287518064	1	1	BnaC03g05220D [Brassica napus]	-	GO:0043234//protein complex	-	-
ncbi_106358509	BNAC03G05140D	0.44	2.22	1.92	0.25	0.28	0.12	0.11	0.42	1.47	0.6667	0.2167	1.5267	2.816835975	5.85E-05	0.005442386	-1.195347598	0.251774166	0.661909727	BnaC03g05140D [Brassica napus]	-	GO:0042579//microbody	-	-
ncbi_106358512	LOC106358512	0.77	3.68	3.13	0.04	0.08	0.22	0	0.08	3.76	1.28	0.1133	2.5267	4.478591197	1.37E-06	0.000282064	-0.981091537	0.553157449	0.884950531	BnaC03g05100D [Brassica napus]	-	-	-	GO:0044248//cellular catabolic process
ncbi_106358513	LOC106358513	0.68	1.41	1.31	0	0	0.08	0.04	0.04	1.09	0.39	0.0267	1.1333	5.409390936	1.04E-05	0.001434631	-1.539026217	0.241306771	0.648743605	BnaC03g05120D [Brassica napus]	-	GO:0043231//intracellular membrane-bounded organelle	-	-
ncbi_106358515	LOC106358515	0.72	2.58	2.37	0.69	0.73	0.42	0.22	0.16	1.49	0.6233	0.6133	1.89	1.623642969	0.00031	0.018412471	-1.600310465	0.100845264	0.425415991	serine/threonine-protein kinase EDR1-like isoform X2 [Brassica rapa]	-	-	GO:0032550//purine ribonucleoside binding	-
ncbi_106358517	LOC106358517	0.33	2.82	2.09	0	0	0	0	0	0.53	0.1767	0	1.7467	10.7703886	7.80E-06	0.001126623	-3.305502547	0.051096793	0.299278467	BnaA03g03570D [Brassica napus]	-	GO:0044444//cytoplasmic part	-	-
ncbi_106358518	LOC106358518	0.83	3.89	3.58	0.76	0.74	0.54	0.2	0.37	3.76	1.4433	0.68	2.7667	2.024542184	0.000280499	0.017186669	-0.938744312	0.409535159	0.810738421	pollen-specific protein SF21-like isoform X2 [Brassica rapa]	-	-	-	GO:0048869//cellular developmental process
ncbi_106358519	LOC106358519	2.37	17.62	14.47	0.2	0.05	0.12	0.05	0.17	23.84	8.02	0.1233	11.4867	6.541253621	4.04E-13	1.42E-09	-0.518286059	0.749382772	0.931552167	BnaC03g05050D [Brassica napus]	ko01100//Metabolic pathways;ko00190//Oxidative phosphorylation	-	GO:0051536//iron-sulfur cluster binding	-
ncbi_106358520	LOC106358520	1.87	6.48	7.65	0	0	0	0.05	0	9.3	3.1167	0	5.3333	12.38082178	8.86E-12	1.84E-08	-0.775033635	0.659273959	0.913487456	BnaC03g05030D [Brassica napus]	ko03010//Ribosome	-	-	GO:0035195//gene silencing by miRNA
ncbi_106358521	LOC106358521	0.45	2.25	2.89	0.05	0.1	0.06	0	0	3.05	1.0167	0.07	1.8633	4.73438705	3.52E-06	0.000602707	-0.87403904	0.653773491	0.913487456	BnaC03g05040D [Brassica napus]	-	-	-	-
ncbi_106358522	LOC106358522	0.9	1.69	1.34	0.15	0.18	0.21	0.31	0.27	2.77	1.1167	0.18	1.31	2.863498	2.38E-07	7.33E-05	-0.230368217	0.830317182	0.93401823	BnaC03g05000D [Brassica napus]	-	GO:0043231//intracellular membrane-bounded organelle	-	-
ncbi_106358523	LOC106358523	0.73	1.17	1.03	0.25	0.1	0.05	0.04	0.12	0.46	0.2067	0.1333	0.9767	2.87282876	1.96E-08	1.06E-05	-2.240560544	0.012523133	0.137175889	BnaC03g04980D [Brassica napus]	ko01100//Metabolic pathways;ko00500//Starch and sucrose metabolism;ko00052//Galactose metabolism	GO:0044444//cytoplasmic part	-	-
ncbi_106358525	LOC106358525	0.44	3.39	3.25	0.04	0.03	0.07	0.02	0	3.54	1.1867	0.0467	2.36	5.660250628	8.63E-11	1.29E-07	-0.991872119	1	1	BnaA03g03480D [Brassica napus]	-	-	-	-
ncbi_106358526	LOC106358526	5.1	20.42	21.41	2.65	1.94	2.3	1.73	1.52	22.72	8.6567	2.2967	15.6433	2.767934572	3.14E-07	9.04E-05	-0.853664446	1	1	BnaC03g04940D [Brassica napus]	-	GO:0044444//cytoplasmic part	-	-
ncbi_106358528	LOC106358528	0.12	0.44	0.71	0.08	0.05	0.05	0.01	0.01	0.46	0.16	0.06	0.4233	2.818759685	0.000235193	0.015134088	-1.403722186	0.428698842	0.824095268	BnaC03g04840D [Brassica napus]	-	-	GO:0043566//structure-specific DNA binding	-
ncbi_106358531	LOC106358531	0.66	1.69	1.57	0.04	0	0.04	0.04	0.08	3.27	1.13	0.0267	1.3067	5.614709844	2.43E-10	2.94E-07	-0.209568381	1	1	BnaC03g01690D [Brassica napus]	-	GO:0035267//NuA4 histone acetyltransferase complex	-	-
ncbi_106358535	BNAC03G01720D	6.07	15.74	15.06	0.08	0.16	0.25	0.26	0.26	60.07	20.1967	0.1633	12.29	6.233521857	2.80E-15	1.77E-11	0.716632289	1	1	BnaC03g01720D [Brassica napus]	-	-	-	GO:0044092//negative regulation of molecular function
ncbi_106358541	LOC106358541	1.88	2.25	1.19	0.43	0.05	0.02	0.03	0.05	4.17	1.4167	0.1667	1.7733	3.411426246	5.11E-05	0.004928725	-0.323963404	0.868635636	0.950239085	BnaC03g01780D [Brassica napus]	ko04144//Endocytosis	-	-	GO:0045184//establishment of protein localization
ncbi_106358544	LOC106358544	2.68	2.95	3.36	12.33	6.99	4.98	0.62	0.51	0.71	0.6133	8.1	2.9967	-1.434563293	0.009830867	0.179390337	-2.288615349	8.04E-09	2.99E-06	VIN3-like protein 2 [Brassica rapa]	-	-	-	GO:0070646//protein modification by small protein removal
ncbi_106358567	LOC106358567	0.09	5.12	5.39	0.02	0.02	0.05	0.01	0.07	5.65	1.91	0.03	3.5333	6.879923548	1.39E-07	4.96E-05	-0.887457221	1	1	BnaC09g12130D [Brassica napus]	-	GO:0044444//cytoplasmic part	-	-
ncbi_106358568	LOC106358568	0.29	3.43	3.65	0.3	0.24	0.36	0.16	0.3	4.09	1.5167	0.3	2.4567	3.033667713	8.89E-05	0.007473759	-0.695798074	1	1	BnaC09g12120D [Brassica napus]	-	-	-	GO:0070646//protein modification by small protein removal
ncbi_106358570	LOC106358570	0.05	9.96	10.69	0.11	0.02	0.09	0.1	0.04	11.83	3.99	0.0733	6.9	6.555983434	3.38E-07	9.40E-05	-0.790207615	1	1	BnaC09g12080D [Brassica napus]	-	-	GO:0046943//carboxylic acid transmembrane transporter activity	-
ncbi_106358581	LOC106358581	3.2	1.45	1.26	2.29	1.86	1.53	5.03	9.25	4.51	6.2633	1.8933	1.97	0.057267201	0.221282363	0.824485316	1.668735031	0.000273236	0.01073435	BnaC08g17480D [Brassica napus]	-	-	-	GO:0048229//gametophyte development
ncbi_106358603	LOC106358603	0.32	0.11	0.1	3.6	0.38	0.13	0	0	0	0	1.37	0.1767	-2.955074129	0.039271528	0.389312948	-7.464886049	0.000447501	0.015232865	BnaA01g35480D [Brassica napus]	-	-	-	-
ncbi_106358609	LOC106358609	7.06	34.36	39.96	100.89	156.09	13.63	5.43	1.6	5.76	4.2633	90.2033	27.1267	-1.733468967	0.220037834	0.822890146	-2.669658016	0.000747285	0.021907668	BnaA01g11480D [Brassica napus]	-	-	-	GO:0044092//negative regulation of molecular function
ncbi_106358675	LOC106358675	0.08	0.2	0.16	1.15	0.96	0.8	0.47	0.05	0.29	0.27	0.97	0.1467	-2.725443724	0.00071756	0.032898748	0.880418384	0.381959254	0.788998483	ABSCISIC ACID-INSENSITIVE 5-like protein 6 [Brassica rapa]	ko04075//Plant hormone signal transduction	GO:0043231//intracellular membrane-bounded organelle	-	-
ncbi_106358694	LOC106358694	0.07	0.83	0.73	0	0	0	0.31	2.24	44.8	15.7833	0	0.5433	9.085693748	0.000135995	0.010133928	4.860420556	0.000729037	0.021567913	nitrile-specifier protein 2-like [Brassica rapa]	-	GO:0044424//intracellular part	-	-
ncbi_106358697	LOC106358697	0.79	1.36	1.53	2.59	5.46	0.91	0.08	0.06	0.27	0.1367	2.9867	1.2267	-1.283792966	0.29986804	0.899958567	-3.166009951	4.05E-05	0.002594098	lysM domain receptor-like kinase 3 [Brassica rapa]	-	-	-	GO:0044036//cell wall macromolecule metabolic process
ncbi_106358818	LOC106358818	1.84	0.8	1.08	3.59	2.26	4.67	4.86	11.47	2.59	6.3067	3.5067	1.24	-1.499760178	0.068011791	0.513329472	2.346537562	0.000281291	0.010956681	At4g33980-like protein [Brassica napus]	-	-	-	GO:0048511//rhythmic process
ncbi_106358947	LOC106358947	1.25	1.64	0.87	1.41	1.99	0.62	0.13	0.23	0.42	0.26	1.34	1.2533	-0.09646284	0.397668836	0.96003838	-2.269186633	0.000830967	0.023407673	BnaA03g37540D [Brassica napus]	-	-	GO:0032550//purine ribonucleoside binding	-
ncbi_106358973	LOC106358973	0	0.07	0.08	4.41	0.36	12.56	0	0	0	0	5.7767	0.05	-6.852165344	5.44E-05	0.005175383	-5.64385619	0.652682304	0.913487456	BnaA08g11510D [Brassica napus]	-	-	-	-
ncbi_106358991	LOC106358991	0.11	5.59	5.45	0.1	0.05	0.05	0	0	6	2	0.0667	3.7167	5.8008999	4.06E-06	0.000682046	-0.894009304	1	1	BnaC02g16010D [Brassica napus]	-	-	-	-
ncbi_106359001	LOC106359001	0.4	2.06	1.23	9.01	6.15	1.22	0.13	0	0	0.0433	5.46	1.23	-2.150242636	0.079947487	0.550437518	-4.827037288	0.001636581	0.037193586	BnaA08g13750D [Brassica napus]	-	-	GO:0046914//transition metal ion binding	-
ncbi_106359009	LOC106359009	1.61	19.93	19.35	0	0.43	0.48	0.49	0.83	9.74	3.6867	0.3033	13.63	5.489737707	2.86E-06	0.000512414	-1.886396677	1	1	BnaA08g14070D [Brassica napus]	-	GO:0005911//cell-cell junction	-	-
ncbi_106359027	LOC106359027	0.2	4.32	3.21	1.71	1.34	1.12	0	0	0.19	0.0633	1.39	2.5767	0.89042103	0.154461742	0.721668832	-5.34639709	0.001767494	0.039181439	BnaA08g15190D [Brassica napus]	-	-	-	-
ncbi_106359048	LOC106359048	5.5	2.4	2.25	19.65	19.26	11.96	2.31	0.85	11.48	4.88	16.9567	3.3833	-2.325335367	1.45E-05	0.001879895	0.528435826	0.516182477	0.874023196	BnaA08g14360D [Brassica napus]	-	-	GO:0010340//carboxyl-O-methyltransferase activity	-
ncbi_106359052	LOC106359052	0.09	11.15	11	0	0	0	0	0	0.09	0.03	0	7.4133	12.85590667	1.13E-06	0.000250171	-7.949016071	2.38E-05	0.001743404	BnaA08g16390D [Brassica napus]	ko01100//Metabolic pathways;ko00480//Glutathione metabolism;ko00460//Cyanoamino acid metabolism;ko00590//Arachidonic acid metabolism;ko00430//Taurine and hypotaurine metabolism	-	GO:0016755//transferase activity, transferring amino-acyl groups	-
ncbi_106359072	LOC106359072	861.97	1318.6	1347.95	478.95	522.79	672.26	1065.75	570.37	1303.17	979.7633	558	1176.1733	1.075763659	0.000725417	0.033035952	-0.26359548	0.638297204	0.913487456	BnaA08g15380D [Brassica napus]	-	-	-	-
ncbi_106359207	LOC106359207	0.38	0.31	0.33	4.73	5.62	0.45	0.08	0.03	0.1	0.07	3.6	0.34	-3.404390255	0.000623453	0.029686581	-2.280107919	0.013631814	0.143940329	gamma-glutamyltranspeptidase 1 isoform X1 [Brassica rapa]	ko01100//Metabolic pathways;ko00480//Glutathione metabolism;ko00460//Cyanoamino acid metabolism;ko00590//Arachidonic acid metabolism;ko00430//Taurine and hypotaurine metabolism	-	GO:0016755//transferase activity, transferring amino-acyl groups	-
ncbi_106359428	LOC106359428	0	0.53	0.66	0	0	0.01	0	0	0.14	0.0467	0.0033	0.3967	6.894817763	0.000602914	0.029148434	-3.087462841	0.162446766	0.538794264	protein NYNRIN-like [Brassica rapa]	-	-	-	GO:0006259//DNA metabolic process
ncbi_106359455	LOC106359455	2.55	3.88	3.33	1.57	7	2.12	0.72	0.18	0.1	0.3333	3.5633	3.2533	-0.1313088	0.581065264	0.984859178	-3.286881148	4.89E-05	0.002992477	transcription factor TCP3 [Brassica rapa]	-	-	-	GO:0044767//single-organism developmental process
ncbi_106359488	LOC106359488	0.12	3.61	2.07	0	0	0	0	0	2	0.6667	0	1.9333	10.91687468	1.14E-05	0.001542841	-1.5360529	0.436487029	0.827243406	trafficking protein particle complex subunit 1-like [Brassica rapa]	-	-	-	GO:0045491//xylan metabolic process
ncbi_106359529	LOC106359529	0.97	1.21	1.09	0.52	2.88	0.74	0.19	0	0.05	0.08	1.38	1.09	-0.340340132	0.853946182	0.984859178	-3.768184325	0.000381844	0.013619151	BnaA03g41020D [Brassica napus]	-	GO:0043231//intracellular membrane-bounded organelle	-	-
ncbi_106359540	LOC106359540	0.8	1.06	0.61	1.93	1.89	0.57	0.06	0	0.14	0.0667	1.4633	0.8233	-0.829709898	0.67836074	0.984859178	-3.626439137	0.001513786	0.035371269	probable inactive receptor kinase At1g27190 [Brassica rapa]	-	GO:0016020//membrane	-	-
ncbi_106359551	LOC106359551	0.08	2.03	2.33	0.13	0.13	0.14	0.04	0.11	0.73	0.2933	0.1333	1.48	3.472487771	0.000644031	0.030366787	-2.334984248	0.087151415	0.394414999	BnaC02g03120D [Brassica napus]	-	-	-	GO:0050794//regulation of cellular process
ncbi_106359619	LOC106359619	0.04	2.84	3.38	0	0.03	0	0	0.04	1.62	0.5533	0.01	2.0867	7.705056346	1.67E-05	0.002087675	-1.914979416	0.292443145	0.706565686	BnaC09g07400D [Brassica napus]	-	-	-	GO:0045491//xylan metabolic process
ncbi_106359733	LOC106359733	0.12	1.54	2.08	0	0	0	0.12	0.12	0.81	0.35	0	1.2467	10.28386005	5.11E-05	0.004928725	-1.832648942	0.149277373	0.517695553	BnaA08g10050D [Brassica napus]	-	-	-	-
ncbi_106359738	LOC106359738	258.4	103.36	99.42	52.24	6.59	188.02	434.12	510.08	490.36	478.1867	82.2833	153.7267	0.901695304	0.297358113	0.897757358	1.637206456	2.82E-05	0.001979626	BnaA08g09930D [Brassica napus]	-	-	-	GO:1901576//organic substance biosynthetic process
ncbi_106359761	LOC106359761	0	0	0	3.33	0.28	0.04	0.02	0	0	0.0067	1.2167	0	-10.24871825	0.000201872	0.013586677	2.736965594	0.801923917	0.931552167	BnaA09g51080D [Brassica napus]	ko04141//Protein processing in endoplasmic reticulum;ko04120//Ubiquitin mediated proteolysis	-	-	GO:0051726//regulation of cell cycle
ncbi_106359780	BNAC03G66540D	10.12	16.25	16.33	10.53	7.6	7.51	0.8	0.12	1.26	0.7267	8.5467	14.2333	0.735839808	0.000787516	0.034887806	-4.29183603	7.56E-09	2.83E-06	BnaC03g66540D [Brassica napus]	-	-	-	GO:0042743//hydrogen peroxide metabolic process
ncbi_106359782	LOC106359782	5.87	22.71	18.65	2.44	4.93	2.98	7.4	4.58	26.38	12.7867	3.45	15.7433	2.190072768	4.44E-05	0.004439082	-0.300100815	0.728068202	0.931552167	bifunctional inhibitor/lipid-transfer protein/seed storage 2S albumin superfamily protein [Arabidopsis thaliana]	-	-	-	GO:0010876//lipid localization
ncbi_106359787	LOC106359787	3.08	6.17	7.35	26.36	29.97	6.62	0.19	0.14	0.59	0.3067	20.9833	5.5333	-1.923023136	0.029826609	0.339015011	-4.17340557	1.99E-08	6.10E-06	BnaA08g11950D [Brassica napus]	-	-	-	GO:0048588//developmental cell growth
ncbi_106359793	LOC106359793	0.41	0.81	0.45	8.51	3.33	1.41	0.04	0.13	0.09	0.0867	4.4167	0.5567	-2.988072352	0.000858285	0.036862513	-2.683264574	0.00928432	0.114448708	BnaC03g66890D [Brassica napus]	-	GO:0044444//cytoplasmic part	-	-
ncbi_106359813	LOC106359813	0.54	1.88	1.79	1.83	2.56	0.91	0	0	0.03	0.01	1.7667	1.4033	-0.332172126	0.703200948	0.984859178	-7.132713922	3.15E-06	0.000376492	10-deacetylbaccatin III 10-O-acetyltransferase-like [Brassica rapa]	-	-	GO:0016747//transferase activity, transferring acyl groups other than amino-acyl groups	-
ncbi_106359865	LOC106359865	3.44	3.13	3.26	3.42	3.37	4.53	5.97	9.01	5.34	6.7733	3.7733	3.2767	-0.203610636	0.590285055	0.984859178	1.04763708	0.000310529	0.011809552	LOW QUALITY PROTEIN: E3 ubiquitin protein ligase RIN2 [Brassica rapa]	ko04141//Protein processing in endoplasmic reticulum	-	GO:0046914//transition metal ion binding	-
ncbi_106359888	LOC106359888	12.94	2.37	2.36	2.12	0.65	7.43	26.27	42.85	24.85	31.3233	3.4	5.89	0.792732888	0.361393671	0.942401023	2.410898209	0.00026475	0.010506468	BnaA08g30990D [Brassica napus]	-	-	-	GO:0010260//organ senescence
ncbi_106360031	LOC106360031	43.9	19.04	19.11	16.49	23.65	48.28	102.48	210.13	85.91	132.84	29.4733	27.35	-0.107869401	0.782819129	0.984859178	2.28007689	1.46E-06	0.000204429	histone-lysine N-methyltransferase 2B-like [Brassica rapa]	-	-	-	GO:0009791//post-embryonic development
ncbi_106360049	LOC106360049	0.69	0.23	0.18	1.73	0.4	1.32	1.3	2.22	1.74	1.7533	1.15	0.3667	-1.649092838	0.212576584	0.813756099	2.257559276	0.001531306	0.035627263	ethylene-responsive transcription factor 11-like [Brassica rapa]	-	GO:0043231//intracellular membrane-bounded organelle	-	-
ncbi_106360117	BNAA08G19180D	0.38	0.17	0.04	0	0	0.4	1.72	3.2	0.84	1.92	0.1333	0.1967	0.560714954	0.796630581	0.984859178	3.287281952	0.001770946	0.039193211	BnaC07g11000D [Brassica napus]	-	GO:0043231//intracellular membrane-bounded organelle	-	-
ncbi_106360184	BNAC08G15750D	0.53	2.44	1.9	4.09	1.77	0.49	0	0	0	0	2.1167	1.6233	-0.38283482	0.748532307	0.984859178	-10.66474356	0.000175543	0.007795962	BnaC08g15750D [Brassica napus]	-	GO:0043231//intracellular membrane-bounded organelle	-	-
ncbi_106360223	LOC106360223	0.94	1.47	1.76	70.45	12.41	2.55	0.08	0	0.36	0.1467	28.47	1.39	-4.356285705	0.000166212	0.011770217	-3.244471955	0.005900645	0.086787263	BnaC08g14860D [Brassica napus]	-	-	-	-
ncbi_106360224	LOC106360224	9.12	41.32	40.81	51.13	106.14	37.62	6.6	2.04	5.46	4.7	64.9633	30.4167	-1.094763602	0.435377393	0.976433384	-2.694129396	0.000328252	0.012305003	probable pectinesterase 56 [Brassica rapa]	ko01100//Metabolic pathways;ko00040//Pentose and glucuronate interconversions	GO:0044444//cytoplasmic part	-	-
ncbi_106360239	LOC106360239	7.16	3.11	4.38	5.18	3.1	7.04	11.16	15.48	12.68	13.1067	5.1067	4.8833	-0.064515633	0.596809517	0.984859178	1.424362657	0.000103935	0.005230195	BnaA08g24950D [Brassica napus]	-	-	-	-
ncbi_106360242	LOC106360242	1.38	0.22	0.46	79.79	7.38	0.68	0	0	0.15	0.05	29.2833	0.6867	-5.414326044	0.000255425	0.015984588	-3.779609932	0.037332519	0.253183124	neurofilament medium polypeptide-like isoform X1 [Brassica rapa]	-	-	-	GO:0010038//response to metal ion
ncbi_106360266	LOC106360266	0	0.1	0.2	12.9	2.2	0.7	0.31	0	0	0.1033	5.2667	0.1	-5.718818247	0.000446489	0.023510677	0.047305715	0.968205267	0.996437868	BnaA08g29110D [Brassica napus]	-	-	GO:0005488//binding	-
ncbi_106360267	LOC106360267	0.72	1.55	1.53	115.9	5.83	1.24	0	0	0.1	0.0333	40.99	1.2667	-5.016163167	0.000742114	0.033669577	-5.247927513	0.000944539	0.025516007	non-specific lipid-transfer protein 2 [Brassica rapa]	-	-	GO:0005488//binding	-
ncbi_106360269	LOC106360269	16.41	4.63	5.8	2.85	1.5	15.98	27.59	41.9	20.48	29.99	6.7767	8.9467	0.400774456	0.58088926	0.984859178	1.745059351	0.000810817	0.023074156	BnaAnng15460D [Brassica napus]	-	GO:0043231//intracellular membrane-bounded organelle	-	-
ncbi_106360284	LOC106360284	0	0	0	0.1	0	0	0.47	2.37	0.41	1.0833	0.0333	0	-5.058893689	0.789440703	0.984859178	10.0812615	8.45E-05	0.004462853	BnaA08g26600D [Brassica napus]	-	-	GO:0005488//binding	-
ncbi_106360438	LOC106360438	0	0	0	4.3	2.13	0	0	0	0	0	2.1433	0	-11.06564052	0.001208144	0.046432093	0	1	1	BnaC02g13440D [Brassica napus]	-	GO:0009536//plastid	-	-
ncbi_106360441	LOC106360441	1.02	1.37	1.26	8.62	10.1	0.84	0.03	0	0.06	0.03	6.52	1.2167	-2.421938001	0.020108288	0.273000869	-5.341827652	2.21E-07	4.58E-05	probable polygalacturonase [Brassica rapa]	-	-	-	GO:0044238//primary metabolic process
ncbi_106360468	LOC106360468	0.37	0.7	0.46	0.14	0.85	0.87	1.37	1.64	1.13	1.38	0.62	0.51	-0.281770968	0.92995433	0.987566612	1.436099115	0.001523989	0.035538575	protein disulfide isomerase-like 1-5 [Brassica rapa]	ko04141//Protein processing in endoplasmic reticulum	-	-	GO:0019725//cellular homeostasis
ncbi_106360474	LOC106360474	0	0.01	0.03	0.86	1.1	0.18	0	0	0	0	0.7133	0.0133	-5.741466986	2.13E-05	0.00251167	-3.736965594	0.545321404	0.884950531	BnaA08g01700D [Brassica napus]	-	-	-	GO:0071704//organic substance metabolic process
ncbi_106360475	LOC106360475	0.1	2.34	3.12	0.05	0.03	0.08	0.04	0.05	1.34	0.4767	0.0533	1.8533	5.118941073	1.59E-06	0.000317923	-1.959069736	0.178034498	0.562302896	BnaA08g01710D [Brassica napus]	-	-	-	GO:0090567//reproductive shoot system development
ncbi_106360502	LOC106360502	2.14	3.26	3.72	1.27	1.71	1.01	0.9	1.69	7.1	3.23	1.33	3.04	1.192645078	0.000103562	0.008305513	0.087462841	0.894925959	0.962521733	BnaC03g68890D [Brassica napus]	-	GO:0044424//intracellular part	-	-
ncbi_106360507	LOC106360507	0.68	0.02	0.08	0.15	4.81	3.36	10.66	25.55	0.03	12.08	2.7733	0.26	-3.415037499	0.021517652	0.283093771	5.537965021	0.000318536	0.012057071	nucleolin 1-like [Brassica rapa]	-	-	GO:0097159//organic cyclic compound binding	-
ncbi_106360524	LOC106360524	0.05	3.62	4.73	0	0.09	0.15	0.05	0.05	4.8	1.6333	0.08	2.8	5.129283017	0.000318543	0.018788074	-0.777607579	0.649123558	0.913487456	BnaC09g05000D [Brassica napus]	-	-	GO:0046983//protein dimerization activity	-
ncbi_106360528	LOC106360528	0.15	5.96	4.77	0.39	0.2	0.07	0	0.21	5.54	1.9167	0.22	3.6267	4.043068722	0.000155855	0.011211395	-0.920044695	0.595228492	0.911184326	BnaC09g04930D [Brassica napus]	-	GO:0044444//cytoplasmic part	-	-
ncbi_106360530	LOC106360530	0.27	2.33	2.41	0.26	0.28	0	0.09	0	2.48	0.8567	0.18	1.67	3.213779291	0.001112014	0.043827991	-0.963042244	0.554652824	0.884950531	BnaC09g04910D [Brassica napus]	ko04146//Peroxisome	-	-	GO:0044710//single-organism metabolic process
ncbi_106360566	LOC106360566	3.25	6.61	7.2	10.66	10.06	4.02	0.71	0.14	1.58	0.81	8.2467	5.6867	-0.536227854	0.895795257	0.984859178	-2.811589428	0.000720706	0.021397397	BnaC05g20100D [Brassica napus]	-	-	-	-
ncbi_106360567	LOC106360567	0.41	0.92	0.97	1.26	1.09	0.56	0.08	0.01	0.19	0.0933	0.97	0.7667	-0.339385292	0.621406052	0.984859178	-3.038135129	0.001144768	0.029000411	BnaC05g20100D [Brassica napus]	-	-	-	-
ncbi_106360583	LOC106360583	1.72	5.1	7.02	5.04	12.43	9.53	0.38	0.06	0.91	0.45	9	4.6133	-0.964115464	0.470983839	0.984582558	-3.357812631	0.000618304	0.019030601	BnaC02g03320D [Brassica napus]	-	GO:0031224//intrinsic component of membrane	-	-
ncbi_106360606	LOC106360606	0.15	3.79	3.55	0.52	0.41	0.25	0.12	0.57	3.94	1.5433	0.3933	2.4967	2.666178859	0.00118211	0.045768676	-0.693953525	0.586614546	0.906195705	BnaA08g30180D [Brassica napus]	-	-	-	GO:0016485//protein processing
ncbi_106360619	LOC106360619	9.62	9.02	8.57	36.26	19.41	19.73	6.76	7.91	9.04	7.9033	25.1333	9.07	-1.470427567	0.000598223	0.028989978	-0.198641294	0.505526738	0.866930868	vacuole membrane protein 1-like [Brassica rapa]	-	GO:0043231//intracellular membrane-bounded organelle	-	-
ncbi_106360621	LOC106360621	92.74	89.56	72.14	36.78	34.34	39.04	119.12	165.67	84.8	123.1967	36.72	84.8133	1.207725027	2.14E-07	6.82E-05	0.538600231	0.067473203	0.34600878	myrosinase MA1 [Brassica rapa]	ko00380//Tryptophan metabolism	-	-	GO:0044238//primary metabolic process
ncbi_106360635	LOC106360635	0.27	10.25	9.97	0.16	0.61	0	0	0.07	8.42	2.83	0.2567	6.83	4.733917728	9.82E-05	0.00799537	-1.271083525	1	1	BnaC08g10290D [Brassica napus]	-	GO:0043231//intracellular membrane-bounded organelle	-	-
ncbi_106360638	LOC106360638	0.14	0.41	0.54	0	0	0	0	0	0.39	0.13	0	0.3633	8.505149919	0.000259969	0.016219477	-1.482782106	0.412891756	0.814149367	zeaxanthin epoxidase, chloroplastic [Brassica rapa]	-	-	-	GO:0044710//single-organism metabolic process
ncbi_106360762	LOC106360762	6.67	20.85	21.47	12.45	15.23	4.72	5.19	2.75	3.7	3.88	10.8	16.33	0.596493479	0.050995639	0.445990323	-2.073396233	0.0007508	0.021985848	CTP synthase [Brassica rapa]	ko01100//Metabolic pathways;ko00240//Pyrimidine metabolism	-	GO:0032550//purine ribonucleoside binding	-
ncbi_106360791	LOC106360791	22.04	11.64	12.33	6.41	12.14	16.97	46.95	28.41	44.28	39.88	11.84	15.3367	0.373315875	0.231044538	0.834974322	1.378680454	0.000204605	0.008754765	BnaC08g26600D [Brassica napus]	-	GO:0043231//intracellular membrane-bounded organelle	-	-
ncbi_106360793	LOC106360793	0.56	0.06	0	0	0	0.68	2.94	5.36	0.89	3.0633	0.2267	0.2067	-0.133266531	0.961258346	0.992815055	3.889724741	0.000934112	0.025319544	BnaA09g35300D [Brassica napus]	-	-	-	GO:0044260//cellular macromolecule metabolic process
ncbi_106360801	LOC106360801	6.3	6.44	6.53	17.92	16.18	6.12	1.41	1.23	2.2	1.6133	13.4067	6.4233	-1.06155651	0.179507257	0.765970452	-1.993277619	1.85E-07	4.00E-05	BnaC08g26740D [Brassica napus]	ko01100//Metabolic pathways;ko01200//Carbon metabolism;ko00710//Carbon fixation in photosynthetic organisms	-	GO:0050308//sugar-phosphatase activity	-
ncbi_106360893	LOC106360893	59.22	133.27	133.43	41.06	53.92	50.48	37.81	24.02	50.91	37.58	48.4867	108.64	1.163895404	0.00093838	0.039000775	-1.531518413	0.003730221	0.06476407	Stearoyl-acyl carrier protein desaturase [Brassica napus]	ko01212//Fatty acid metabolism;ko00061//Fatty acid biosynthesis;ko01040//Biosynthesis of unsaturated fatty acids	-	-	GO:0070838//divalent metal ion transport
ncbi_106360960	LOC106360960	2.82	0.95	1.08	2.72	2.13	4.16	4.61	7.87	3.82	5.4333	3.0033	1.6167	-0.893542359	0.377848447	0.954986603	1.748815312	0.000405107	0.014142726	BnaA09g22890D [Brassica napus]	-	-	-	-
ncbi_106360983	LOC106360983	14.96	10.61	10.89	18.6	12.96	12.36	20.74	37.43	39.12	32.43	14.64	12.1533	-0.268563493	0.380899095	0.956342462	1.415976963	1.09E-05	0.00096516	BnaA08g10170D [Brassica napus]	-	-	GO:0051540//metal cluster binding	-
ncbi_106360991	LOC106360991	0.47	0.23	0.09	2.28	1.42	0.86	0.32	0.28	0.11	0.2367	1.52	0.2633	-2.529109266	0.001318323	0.049029535	-0.154033629	0.920780762	0.97464863	DNA-directed RNA polymerase II subunit 2-like [Brassica rapa]	ko01100//Metabolic pathways;ko00230//Purine metabolism;ko00240//Pyrimidine metabolism;ko03020//RNA polymerase	GO:0044444//cytoplasmic part	-	-
ncbi_106360999	LOC106360999	0.06	0.29	0.42	0	0	0.02	0.09	0.05	0.5	0.2133	0.0067	0.2567	5.266786541	0.000164528	0.011675603	-0.266786541	0.802517675	0.931552167	BnaA08g09810D [Brassica napus]	-	-	-	GO:0043092//L-amino acid import
ncbi_106361036	LOC106361036	1.67	4.61	4.18	0.57	0.5	0.47	2.81	2.08	2.92	2.6033	0.5133	3.4867	2.763880596	4.57E-08	2.05E-05	-0.421488398	0.481279057	0.852226486	BnaA08g11270D [Brassica napus]	-	-	-	-
ncbi_106361082	LOC106361082	3.17	4.3	3.3	2.97	2.95	5.11	7.84	13.19	8.11	9.7133	3.6767	3.59	-0.034414541	0.504168134	0.984859178	1.435982628	6.08E-05	0.00352952	BnaC03g77120D [Brassica napus]	-	-	-	GO:0048511//rhythmic process
ncbi_106361146	LOC106361146	0.47	7.72	9.29	0.91	0.87	0.24	0.41	0.33	6.41	2.3833	0.6733	5.8267	3.113277987	0.000311137	0.018430193	-1.289690038	0.325879629	0.741929881	ATP synthase subunit f, mitochondrial [Gossypium arboreum]	-	-	-	GO:0045333//cellular respiration
ncbi_106361152	LOC106361152	3.51	7.15	7.28	12.28	9.48	2.93	1	0.73	1.38	1.0367	8.23	5.98	-0.460746946	0.740142534	0.984859178	-2.528193405	8.70E-07	0.000136806	VIN3-like protein 2 [Brassica rapa]	-	-	-	GO:0070646//protein modification by small protein removal
ncbi_106361155	LOC106361155	0.47	7.72	9.29	0.91	0.87	0.24	0.41	0.33	6.41	2.3833	0.6733	5.8267	3.113277987	0.000311137	0.018430193	-1.289690038	0.325879629	0.741929881	ATP synthase subunit f, mitochondrial [Gossypium arboreum]	-	-	-	GO:0045333//cellular respiration
ncbi_106361162	LOC106361162	0.59	2.53	2.44	0.42	0.48	0.42	0.47	0.3	1.72	0.83	0.44	1.8533	2.074546953	0.000682327	0.0317348	-1.158939141	0.219802785	0.620487966	BnaA08g13310D [Brassica napus]	ko03018//RNA degradation	GO:0044444//cytoplasmic part	-	-
ncbi_106361185	LOC106361185	6.76	8.88	9.92	39.64	46.37	12.76	2.31	1.55	2.24	2.0333	32.9233	8.52	-1.950185074	0.0041387	0.105483485	-2.067006688	4.24E-06	0.000472583	photosystem I reaction center subunit IV A, chloroplastic-like [Brassica rapa]	ko01100//Metabolic pathways;ko00195//Photosynthesis	-	-	GO:0030001//metal ion transport
ncbi_106361197	LOC106361197	0.28	4	4.98	0.57	0.16	0.26	0.07	0.07	2.67	0.9367	0.33	3.0867	3.225511763	0.000441793	0.023309362	-1.720442063	0.250982716	0.660916876	BnaA08g13720D [Brassica napus]	ko03420//Nucleotide excision repair;ko03440//Homologous recombination;ko03030//DNA replication;ko03430//Mismatch repair	GO:0044444//cytoplasmic part	-	-
ncbi_106361203	LOC106361203	0.19	3.84	4.03	0.4	0.3	0.39	0.19	0.35	2.51	1.0167	0.3633	2.6867	2.886451704	0.000639108	0.030204135	-1.401970596	0.246058085	0.653998052	BnaA08g13790D [Brassica napus]	-	GO:0043231//intracellular membrane-bounded organelle	-	-
ncbi_106361231	BNAA08G14030D	15.74	2.58	2.38	0.53	0.38	4.11	73.12	133.17	77.92	94.7367	1.6733	6.9	2.043871498	0.067712579	0.511966003	3.779254644	1.02E-07	2.41E-05	BnaA08g14030D [Brassica napus]	-	-	-	-
ncbi_106361259	LOC106361259	8.98	10.66	8.91	27.69	27.85	8.85	4.41	1.92	3.97	3.4333	21.4633	9.5167	-1.173345904	0.145853711	0.706194641	-1.470846408	0.001746644	0.038843341	glyceraldehyde-3-phosphate dehydrogenase GAPB, chloroplastic [Brassica rapa]	ko01100//Metabolic pathways;ko01200//Carbon metabolism;ko00710//Carbon fixation in photosynthetic organisms	-	-	GO:0048608//reproductive structure development
ncbi_106361266	LOC106361266	12.41	2.33	2.43	1.31	2.74	1.31	75.28	59.26	87.82	74.12	1.7867	5.7233	1.679585134	0.005077624	0.119536148	3.694935343	1.04E-08	3.81E-06	cytochrome P450 83B1 [Brassica rapa]	ko01110//Biosynthesis of secondary metabolites;ko01210//2-Oxocarboxylic acid metabolism;ko00380//Tryptophan metabolism;ko00966//Glucosinolate biosynthesis	-	-	GO:0048364//root development
ncbi_106361280	LOC106361280	1.05	0.57	0.69	4.87	5.8	3.03	1.31	0.67	1.14	1.04	4.5667	0.77	-2.568211136	7.97E-06	0.001147449	0.433653177	0.412144347	0.813438936	RING-H2 finger protein ATL45-like [Brassica rapa]	-	-	GO:0046914//transition metal ion binding	-
ncbi_106361283	LOC106361283	1.1	2.9	2.39	11.67	4.62	1.81	0.13	0	0.38	0.17	6.0333	2.13	-1.502101861	0.225649039	0.828689532	-3.647246779	0.000588786	0.01844334	BnaAnng32080D, partial [Brassica napus]	ko04144//Endocytosis	GO:0043231//intracellular membrane-bounded organelle	-	-
ncbi_106361312	LOC106361312	0	0	0	0.46	0.96	0.88	1.04	0.81	0.41	0.7533	0.7667	0	-9.582455645	8.80E-06	0.001240536	9.557144557	9.42E-07	0.000145211	protein S-acyltransferase 8-like [Brassica rapa]	-	-	GO:0046914//transition metal ion binding	-
ncbi_106361313	LOC106361313	2.46	0.72	0.8	1.54	0.67	1.87	5.11	5.02	3.35	4.4933	1.36	1.3267	-0.035800721	0.663410485	0.984859178	1.759980161	0.001520831	0.035475551	BnaA08g14660D [Brassica napus]	-	-	-	GO:0044707//single-multicellular organism process
ncbi_106361337	LOC106361337	9.73	11.4	13.37	5.53	7.57	3.04	10.63	26.49	10.36	15.8267	5.38	11.5	1.095955783	1.64E-05	0.002063077	0.460723573	0.318856495	0.735597139	BnaA08g31010D [Brassica napus]	ko03008//Ribosome biogenesis in eukaryotes	GO:0043234//protein complex	-	-
ncbi_106361341	LOC106361341	0.54	0.87	0.85	0.5	0.23	0.16	0.17	0.57	0.16	0.3	0.2967	0.7533	1.344445531	0.001293997	0.048455339	-1.328325866	0.070906087	0.355325462	BnaA08g14490D [Brassica napus]	ko04075//Plant hormone signal transduction;ko04016//MAPK signaling pathway - plant	-	GO:0046872//metal ion binding	-
ncbi_106361357	LOC106361357	0.05	11.07	11.68	0	0.08	0.04	0.09	0.05	6.54	2.2267	0.04	7.6	7.569855608	1.01E-06	0.000228055	-1.771113817	1	1	minor allergen Alt a 7 [Brassica rapa]	ko01110//Biosynthesis of secondary metabolites;ko00130//Ubiquinone and other terpenoid-quinone biosynthesis	-	-	GO:0044710//single-organism metabolic process
ncbi_106361362	LOC106361362	1.16	4.14	7.61	3.03	1.62	0.54	0	0	0.27	0.09	1.73	4.3033	1.314682557	0.021313535	0.281627688	-5.579385783	5.33E-05	0.003186802	BnaCnng62910D [Brassica napus]	-	-	-	-
ncbi_106361380	LOC106361380	0.78	5.41	7.19	0.8	1.63	0.57	0.75	0.65	0.83	0.7433	1	4.46	2.15704371	0.001935646	0.064268005	-2.584962501	0.00250757	0.049771785	protein CURVATURE THYLAKOID 1D, chloroplastic [Brassica rapa]	-	GO:0009534//chloroplast thylakoid	-	-
ncbi_106361385	LOC106361385	0.22	0.17	0.16	2.66	2.09	1.08	0.07	0.11	0.14	0.1067	1.9433	0.1833	-3.40599236	1.22E-06	0.000266249	-0.781359714	0.515270981	0.873353268	BnaA08g15920D [Brassica napus]	ko01100//Metabolic pathways;ko01110//Biosynthesis of secondary metabolites;ko00940//Phenylpropanoid biosynthesis	-	-	GO:0051707//response to other organism
ncbi_106361388	LOC106361388	3.51	2.71	2.77	9.57	7.87	2.74	0.72	0.91	1.68	1.1033	6.7267	2.9967	-1.166533154	0.14928587	0.71266681	-1.441489899	0.002013693	0.042819574	serine hydroxymethyltransferase 1, mitochondrial [Brassica rapa]	ko01100//Metabolic pathways;ko01110//Biosynthesis of secondary metabolites;ko01200//Carbon metabolism;ko01230//Biosynthesis of amino acids;ko00630//Glyoxylate and dicarboxylate metabolism;ko00260//Glycine, serine and threonine metabolism;ko00460//Cyanoamino acid metabolism;ko00670//One carbon pool by folate	-	-	GO:0048511//rhythmic process
ncbi_106361389	LOC106361389	2.18	1.68	1.31	2.89	3.51	1.05	0.31	0.26	0.5	0.3567	2.4833	1.7233	-0.527076145	0.963562135	0.993298663	-2.272553484	0.000325549	0.012239093	NAD(P)H-quinone oxidoreductase subunit M, chloroplastic [Brassica rapa]	-	-	-	GO:0044710//single-organism metabolic process
ncbi_106361392	LOC106361392	0.81	7.81	6.8	1.2	0.82	0.83	0.45	0.46	0.61	0.5067	0.95	5.14	2.435768941	0.000211288	0.01401348	-3.342659536	5.58E-05	0.003284963	DNA ligase 1 [Brassica rapa]	-	GO:0043231//intracellular membrane-bounded organelle	-	-
ncbi_106361479	LOC106361479	5.25	8.59	8.6	29.76	31.87	4.26	0.37	0.76	1.15	0.76	21.9633	7.48	-1.553986851	0.166414337	0.743948837	-3.298966946	1.07E-09	5.67E-07	probable fructose-bisphosphate aldolase 2, chloroplastic [Brassica rapa]	ko01100//Metabolic pathways;ko01110//Biosynthesis of secondary metabolites;ko01200//Carbon metabolism;ko01230//Biosynthesis of amino acids;ko00010//Glycolysis / Gluconeogenesis;ko00710//Carbon fixation in photosynthetic organisms;ko00051//Fructose and mannose metabolism;ko00030//Pentose phosphate pathway	-	-	GO:0048869//cellular developmental process
ncbi_106361486	LOC106361486	28.7	83.35	84.08	135.78	120.52	56.25	17.27	9.62	21.95	16.28	104.1833	65.3767	-0.672276776	0.889285586	0.984859178	-2.005675121	0.000784084	0.022594595	cysteine proteinase RD19a-like [Brassica rapa]	ko04626//Plant-pathogen interaction	GO:0043231//intracellular membrane-bounded organelle	-	-
ncbi_106361503	LOC106361503	1.13	2.25	1.94	3.18	1.63	0.26	0.09	0.32	0.33	0.2467	1.69	1.7733	0.069440498	0.305056096	0.903316134	-2.84582907	9.09E-06	0.000839968	ribonucleoside-diphosphate reductase large subunit-like [Brassica rapa]	ko01100//Metabolic pathways;ko00230//Purine metabolism;ko00240//Pyrimidine metabolism;ko00480//Glutathione metabolism	-	-	GO:0051603//proteolysis involved in cellular protein catabolic process
ncbi_106361524	LOC106361524	1.05	1.03	0.92	2.67	1.32	1.27	2.45	3.43	1.49	2.4567	1.7533	1	-0.810100299	0.476876838	0.984859178	1.296702119	0.001657279	0.037510464	BnaC09g35530D [Brassica napus]	-	-	GO:0046872//metal ion binding	-
ncbi_106361527	LOC106361527	6.84	6.49	6.36	31.47	29.23	5.79	1.44	0.45	1.89	1.26	22.1633	6.5633	-1.755674266	0.039554314	0.390700047	-2.381004972	0.000148801	0.006861726	BnaC08g07970D [Brassica napus]	-	-	-	GO:0044237//cellular metabolic process
ncbi_106361528	LOC106361528	2.38	2.55	3.84	12.32	11.32	1.56	0.23	0.15	0.7	0.36	8.4	2.9233	-1.522774986	0.210298865	0.810667875	-3.02154553	0.000153764	0.007044583	BnaC08g07970D [Brassica napus]	-	-	-	GO:0044237//cellular metabolic process
ncbi_106361531	LOC106361531	3.33	3.61	2.9	7.55	8.93	3.55	1.09	0.54	1.33	0.9867	6.6767	3.28	-1.0254322	0.186380473	0.775109329	-1.73306114	0.000564075	0.017951349	plastidic glutamine synthetase precursor [Brassica napus]	ko01100//Metabolic pathways;ko01230//Biosynthesis of amino acids;ko00630//Glyoxylate and dicarboxylate metabolism;ko00250//Alanine, aspartate and glutamate metabolism;ko00910//Nitrogen metabolism;ko00220//Arginine biosynthesis	-	-	GO:0044767//single-organism developmental process
ncbi_106361536	LOC106361536	0.66	1.24	0.52	5.36	5.28	4.08	1.53	0.83	1.34	1.2333	4.9067	0.8067	-2.604698719	6.32E-06	0.000964292	0.612518223	0.270712797	0.683678385	BnaA08g16960D [Brassica napus]	-	-	-	GO:0044238//primary metabolic process
ncbi_106361578	LOC106361578	1.02	0.93	0.67	2.56	1.99	0.8	0.29	0.36	0.3	0.3167	1.7833	0.8733	-1.02997208	0.262012155	0.864744085	-1.463567393	6.76E-05	0.003782034	BnaA08g17370D [Brassica napus]	-	-	-	GO:0055085//transmembrane transport
ncbi_106361579	LOC106361579	8.24	1.18	0.77	44.8	53.24	13.4	2.65	1.15	1.63	1.81	37.1467	3.3967	-3.451041206	0.000789848	0.03489582	-0.908129948	0.445006711	0.833926359	photosystem I reaction center subunit psaK, chloroplastic [Brassica rapa]	ko01100//Metabolic pathways;ko00195//Photosynthesis	-	GO:0046906//tetrapyrrole binding	-
ncbi_106361603	LOC106361603	9.11	19.88	15.23	320.68	466.16	25.21	0.71	1	4.14	1.95	270.6833	14.74	-4.19879763	1.93E-05	0.002320268	-2.918190495	0.000123055	0.005957121	BnaC03g59520D [Brassica napus]	ko01100//Metabolic pathways;ko00196//Photosynthesis - antenna proteins	-	GO:0046906//tetrapyrrole binding	-
ncbi_106361618	LOC106361618	7.49	11.69	8.69	128.35	185.09	13.74	0.74	0.7	1.41	0.95	109.06	9.29	-3.553299654	0.000100185	0.008098031	-3.289679178	1.13E-11	1.04E-08	BnaC03g59520D [Brassica napus]	ko01100//Metabolic pathways;ko00196//Photosynthesis - antenna proteins	-	GO:0046906//tetrapyrrole binding	-
ncbi_106361622	LOC106361622	0.88	6.37	7.51	1.08	1.27	0.67	0.84	0.8	1.32	0.9867	1.0067	4.92	2.289072267	0.000290714	0.017693639	-2.31802364	0.00398492	0.067719254	BnaA08g17750D [Brassica napus]	-	GO:0043231//intracellular membrane-bounded organelle	-	-
ncbi_106361630	LOC106361630	6.87	2.65	2.31	3.15	2.71	12.02	11.72	11.78	8.42	10.64	5.96	3.9433	-0.595896663	0.670145222	0.984859178	1.432010578	0.002417112	0.048516403	BnaA07g04160D [Brassica napus]	-	-	GO:0046914//transition metal ion binding	-
ncbi_106361691	LOC106361691	0.46	1.01	0.71	5.47	2.33	0.9	0.07	0.12	0.16	0.1167	2.9	0.7267	-1.996687266	0.037224108	0.377687056	-2.638901308	0.000183652	0.00806688	BnaA08g18450D [Brassica napus]	-	-	-	-
ncbi_106361731	LOC106361731	1.06	1.42	1.31	3.24	1.84	0.37	0	0	0.06	0.02	1.8167	1.2633	-0.524058381	0.850370926	0.984859178	-5.981091537	8.11E-06	0.000770087	BnaA03g47110D [Brassica napus]	ko01100//Metabolic pathways;ko01110//Biosynthesis of secondary metabolites;ko00860//Porphyrin metabolism	-	-	GO:0042254//ribosome biogenesis
ncbi_106361753	BNAC03G75800D	4.18	2.06	2.32	14.22	8.88	7.71	4.05	3	1.73	2.9267	10.27	2.8533	-1.847715981	0.000377224	0.020868897	0.036610143	0.817663053	0.931552167	BnaC03g75800D [Brassica napus]	-	GO:0009536//plastid	-	-
ncbi_106361814	LOC106361814	3.6	4.75	4.58	6.07	8.16	1.83	1.34	0.87	1.85	1.3533	5.3533	4.31	-0.312749618	0.570350371	0.984859178	-1.671170643	0.000143078	0.006665007	BnaA03g57840D [Brassica napus]	-	-	-	GO:0051693//actin filament capping
ncbi_106361821	LOC106361821	12.64	7.03	6.33	12.45	7.65	9.21	16.66	35.84	14.55	22.35	9.77	8.6667	-0.172881345	0.433789655	0.975747345	1.366725709	0.00171676	0.038387395	long chain acyl-CoA synthetase 8 [Brassica rapa]	ko01100//Metabolic pathways;ko04146//Peroxisome;ko01212//Fatty acid metabolism;ko00071//Fatty acid degradation;ko00061//Fatty acid biosynthesis	-	GO:0015645//fatty acid ligase activity	-
ncbi_106361824	LOC106361824	117.38	75.09	72.42	519.66	420.11	162.6	38.3	38.76	48.22	41.76	367.4567	88.2967	-2.057143246	6.85E-05	0.006121066	-1.080237263	0.00027497	0.010791567	-	-	-	-	-
ncbi_106361846	BNAA08G19660D	1.02	1.52	1.85	1.22	1.82	1.07	0.2	0	0	0.0667	1.37	1.4633	0.095082546	0.289051433	0.889028714	-4.456149035	0.000544096	0.017559909	BnaCnng04500D [Brassica napus]	-	GO:0043231//intracellular membrane-bounded organelle	-	-
ncbi_106361905	LOC106361905	40.41	29.09	28.47	103.72	99.33	62.19	24.21	14.7	22.14	20.35	88.4133	32.6567	-1.436886415	1.18E-05	0.00157937	-0.682348745	0.073940617	0.362534611	BnaUnng04460D [Brassica napus]	-	-	-	-
ncbi_106361939	LOC106361939	22.36	16.03	15.56	13.23	14.74	21.95	31.76	41.34	39.16	37.42	16.64	17.9833	0.112005026	0.287256593	0.887768726	1.0571491	6.69E-07	0.000109427	BnaCnng04780D [Brassica napus]	ko01100//Metabolic pathways;ko01110//Biosynthesis of secondary metabolites;ko01230//Biosynthesis of amino acids;ko00400//Phenylalanine, tyrosine and tryptophan biosynthesis	-	-	GO:0051707//response to other organism
ncbi_106361985	LOC106361985	1.7	4.04	3.53	5.13	7.38	0.76	0.1	0	0.1	0.0667	4.4233	3.09	-0.517527127	0.869373896	0.984859178	-5.534497434	4.87E-08	1.30E-05	BnaA08g22500D [Brassica napus]	-	GO:0031224//intrinsic component of membrane	-	-
ncbi_106361987	LOC106361987	0.96	1.12	1.05	0.07	0.04	0.43	2.7	1.75	2.75	2.4	0.18	1.0433	2.535131345	0.004866685	0.116479361	1.201834249	0.001046827	0.027292969	BnaA08g22530D [Brassica napus]	-	-	-	-
ncbi_106361995	LOC106361995	21.15	28.44	28.5	20.58	25.45	15.64	12.11	9.5	13.46	11.69	20.5567	26.03	0.340568966	0.006462518	0.138796951	-1.154900382	0.000845215	0.023648215	BnaA08g22630D [Brassica napus]	-	-	-	GO:0044238//primary metabolic process
ncbi_106361998	LOC106361998	0.88	0.87	0.86	5.93	2.01	0.3	0.28	0.19	0.12	0.1967	2.7467	0.87	-1.658594531	0.267320825	0.867901158	-2.145262947	0.001130639	0.028783543	BnaA08g22650D [Brassica napus]	ko01100//Metabolic pathways;ko00561//Glycerolipid metabolism	-	-	GO:0006972//hyperosmotic response
ncbi_106362013	LOC106362013	0.37	0.74	0.52	2.56	4.16	0.49	0	0	0	0	2.4033	0.5433	-2.145127295	0.046136333	0.422428548	-9.085693748	4.73E-06	0.000511017	laccase-1 [Brassica rapa]	-	-	GO:0046914//transition metal ion binding	-
ncbi_106362037	LOC106362037	0	0	0	0	3.01	5.48	1.06	2.32	0.18	1.1867	2.83	0	-11.46658634	0.017852843	0.254382663	10.21269903	4.52E-07	8.08E-05	BnaC06g02510D [Brassica napus]	-	-	-	-
ncbi_106362048	LOC106362048	9.72	9.98	10.98	3.51	3.25	5.66	14.6	8.16	13.65	12.1367	4.14	10.2267	1.304633309	0.000784665	0.034834489	0.247036258	0.437950462	0.827431218	BnaCnng51310D [Brassica napus]	-	-	-	-
ncbi_106362050	LOC106362050	9.72	9.98	10.98	3.51	3.25	5.66	14.6	8.16	13.65	12.1367	4.14	10.2267	1.304633309	0.000784665	0.034834489	0.247036258	0.437950462	0.827431218	BnaCnng51310D [Brassica napus]	-	-	-	-
ncbi_106362054	LOC106362054	2.21	2.3	1.7	5.79	9.41	2.71	0.64	0.58	0.51	0.5767	5.97	2.07	-1.528100164	0.03702666	0.376742816	-1.843821231	6.04E-06	0.000612799	BnaC03g57010D [Brassica napus]	-	-	GO:0031406//carboxylic acid binding	-
ncbi_106362116	LOC106362116	4.11	2.43	2.59	9.1	5.81	2.43	1.02	0.98	1.58	1.1933	5.78	3.0433	-0.925417133	0.423516129	0.971737493	-1.350655273	0.001293584	0.031616567	BnaC08g16270D [Brassica napus]	-	GO:0044437//vacuolar part	-	-
ncbi_106362159	LOC106362159	0.97	4.37	4.37	1.56	7.1	3.6	0.03	0	0.22	0.0833	4.0867	3.2367	-0.336415778	0.862563275	0.984859178	-5.279471296	4.81E-06	0.000516132	BnaCnng45550D [Brassica napus]	-	-	-	GO:0032787//monocarboxylic acid metabolic process
ncbi_106362160	LOC106362160	0.2	0.31	0.35	1.3	0.77	0	0	0	0	0	0.69	0.2867	-1.267222203	0.68201022	0.984859178	-8.163230349	0.000601509	0.018683776	sterol 14-demethylase-like [Brassica rapa]	ko01100//Metabolic pathways;ko01110//Biosynthesis of secondary metabolites;ko00100//Steroid biosynthesis	-	GO:0046914//transition metal ion binding	-
ncbi_106362162	LOC106362162	3.86	3.84	4.35	9.44	5.23	1.59	1.23	1.84	2.2	1.7567	5.42	4.0167	-0.432294111	0.675447723	0.984859178	-1.193158279	0.000364224	0.013146397	BnaA08g25180D [Brassica napus]	ko01100//Metabolic pathways;ko01110//Biosynthesis of secondary metabolites;ko00500//Starch and sucrose metabolism	-	-	GO:0046942//carboxylic acid transport
ncbi_106362182	LOC106362182	8.72	0.36	0.51	1.4	2.54	0.13	0	0	0	0	1.3567	3.1967	1.236502021	0.184633334	0.773551853	-11.6423526	4.11E-05	0.00261874	14 kDa proline-rich protein DC2.15 [Brassica rapa]	-	-	-	GO:0060918//auxin transport
ncbi_106362185	LOC106362185	1.9	2.22	2.53	5.84	3.09	1.43	0.57	0.34	0.98	0.63	3.4533	2.2167	-0.639597757	0.964573619	0.993534075	-1.814968106	0.001738191	0.03877737	flavin-containing monooxygenase FMO GS-OX5 [Brassica rapa]	-	GO:0043231//intracellular membrane-bounded organelle	-	-
ncbi_106362196	LOC106362196	1.22	1.78	1.76	5.82	5.03	3.85	0.82	1.15	1.4	1.1233	4.9	1.5867	-1.626782676	0.001312844	0.048914475	-0.498212982	0.236956234	0.643184057	ABSCISIC ACID-INSENSITIVE 5-like protein 6 [Brassica rapa]	ko04075//Plant hormone signal transduction	GO:0043231//intracellular membrane-bounded organelle	-	-
ncbi_106362210	LOC106362210	3.26	36.05	37.4	4.99	27.35	45.35	0.55	0.16	1.91	0.8733	25.8967	25.57	-0.01831425	0.762768345	0.984859178	-4.871775944	3.53E-06	0.000412479	delta-9 desaturase-like 5 protein [Brassica rapa]	-	GO:0031224//intrinsic component of membrane	-	-
ncbi_106362222	LOC106362222	26.36	41.93	43.12	121.13	157.95	42.7	14.63	5.65	9.79	10.0233	107.26	37.1367	-1.530195926	0.051362907	0.448056033	-1.88948196	0.000333745	0.012427046	BnaA08g28710D [Brassica napus]	ko01100//Metabolic pathways;ko00195//Photosynthesis	-	GO:0046872//metal ion binding	-
ncbi_106362243	LOC106362243	3.47	3.55	4.96	4.23	5.06	1.59	1.36	1.47	1.48	1.4367	3.6267	3.9933	0.138949352	0.124358449	0.66636668	-1.474868134	0.000268047	0.010607217	methylsterol monooxygenase 2-2 isoform X2 [Brassica rapa]	ko01100//Metabolic pathways;ko01110//Biosynthesis of secondary metabolites;ko00100//Steroid biosynthesis	-	GO:0046914//transition metal ion binding	-
ncbi_106362276	LOC106362276	56	103.94	96.4	203.95	212.21	101	30.31	12.15	29.8	24.0867	172.3867	85.4467	-1.012552075	0.257304907	0.85855159	-1.826789458	0.00076311	0.022233823	BnaA08g27100D [Brassica napus]	ko01100//Metabolic pathways;ko00520//Amino sugar and nucleotide sugar metabolism	-	GO:0048037//cofactor binding	-
ncbi_106362347	LOC106362347	2.31	2.73	2.81	7.38	4.43	3.73	0.87	0.57	1.1	0.8467	5.18	2.6167	-0.985221945	0.208050618	0.807908231	-1.627864157	0.001742293	0.03880506	GTP-binding protein SAR1B-like [Brassica rapa]	ko04141//Protein processing in endoplasmic reticulum	-	-	GO:0051603//proteolysis involved in cellular protein catabolic process
ncbi_106362348	LOC106362348	4.34	4.96	5.01	15.02	11.04	2.1	0.77	0.37	1.33	0.8233	9.3867	4.77	-0.976623662	0.580735151	0.984859178	-2.534440725	7.76E-06	0.000741877	BnaA08g26530D [Brassica napus]	ko04141//Protein processing in endoplasmic reticulum;ko04145//Phagosome	-	GO:0046872//metal ion binding	-
ncbi_106362349	LOC106362349	3.03	1.22	0.69	14.24	7	1.45	0.18	0.09	0.09	0.12	7.5633	1.6467	-2.199473662	0.059415979	0.481495968	-3.77844223	0.00110666	0.028377147	TPA: histone H3.2 [Zea mays]	-	-	GO:0046983//protein dimerization activity	-
ncbi_106362381	LOC106362381	11.59	9.41	8.55	16.03	12.79	8.18	4.37	3.75	4.98	4.3667	12.3333	9.85	-0.32436714	0.329581533	0.919471657	-1.173591319	3.77E-05	0.002460312	BnaA08g26140D [Brassica napus]	ko01100//Metabolic pathways;ko01110//Biosynthesis of secondary metabolites;ko01200//Carbon metabolism;ko01230//Biosynthesis of amino acids;ko00010//Glycolysis / Gluconeogenesis;ko00260//Glycine, serine and threonine metabolism	-	-	GO:0048229//gametophyte development
ncbi_106362387	LOC106362387	1.36	0.23	0.4	6.72	8.83	1.75	0.13	0.16	0.16	0.15	5.7667	0.6633	-3.119931702	0.000778918	0.034696684	-2.144771524	0.025195857	0.203025269	probable rhamnogalacturonate lyase B [Brassica rapa]	-	-	-	GO:0044238//primary metabolic process
ncbi_106362419	LOC106362419	1.78	1.67	1.78	1.59	3.13	3.68	3.64	4.96	2.89	3.83	2.8	1.7433	-0.683578381	0.606028649	0.984859178	1.135495946	0.000475097	0.015914409	protein NLRC3-like [Brassica rapa]	-	GO:0009526//plastid envelope	-	-
ncbi_106362424	LOC106362424	1.08	1.69	1.51	3	2.17	0.56	0.21	0.37	0.48	0.3533	1.91	1.4267	-0.420924342	0.896568385	0.984859178	-2.013546532	0.001459481	0.034489436	ATP-citrate synthase alpha chain protein 1 [Brassica rapa]	ko01100//Metabolic pathways;ko01110//Biosynthesis of secondary metabolites;ko00020//Citrate cycle (TCA cycle)	-	-	GO:0048827//phyllome development
ncbi_106362437	LOC106362437	5.93	5.04	6.5	10.16	6.84	2.91	2.34	0.46	0.7	1.1667	6.6367	5.8233	-0.188613613	0.324189305	0.91642708	-2.319452781	0.001998767	0.042656639	BnaA08g25500D [Brassica napus]	ko00195//Photosynthesis	-	GO:0051536//iron-sulfur cluster binding	-
ncbi_106362452	LOC106362452	0	0.63	0.64	0	0	0	0	0	0.31	0.1033	0	0.4233	8.725650281	0.001069494	0.042802187	-2.034488376	0.380001821	0.787190492	BnaAnng09900D [Brassica napus]	-	-	-	-
ncbi_106362784	LOC106362784	1.39	1.78	1.45	6.87	5.14	3.44	1.06	1.71	2.21	1.66	5.15	1.54	-1.741642081	0.000129315	0.009769263	0.108252891	0.755975801	0.931552167	BnaA09g09530D [Brassica napus]	-	GO:0043231//intracellular membrane-bounded organelle	-	-
ncbi_106362905	LOC106362905	2.19	1.46	1.34	1.43	1.28	1.63	5.11	14.36	2.71	7.3933	1.4467	1.6633	0.201344773	0.138577366	0.693903553	2.152147645	0.000571365	0.018078002	BnaC06g03570D [Brassica napus]	-	GO:0044444//cytoplasmic part	-	-
ncbi_106362982	LOC106362982	5.62	11.24	10.41	0.39	1.32	2.18	7.6	1.65	7.25	5.5	1.2967	9.09	2.80947264	6.70E-05	0.006025424	-0.724848676	0.337739988	0.753448212	BnaC07g16140D [Brassica napus]	-	-	-	GO:0045491//xylan metabolic process
ncbi_106363288	LOC106363288	0.14	0.46	0.55	5.23	0.76	0.4	0	0	0	0	2.13	0.3833	-2.47418207	0.092384797	0.588613244	-8.582455645	0.000937752	0.02537675	BnaC05g20940D [Brassica napus]	-	-	-	-
ncbi_106363478	LOC106363478	0	0	0.02	0	0.02	0.08	0.14	0.55	0.24	0.31	0.0333	0.0067	-2.321928095	0.517370536	0.984859178	5.539158811	0.000603958	0.018729939	mechanosensitive ion channel protein 9-like [Brassica rapa]	-	-	-	GO:0044763//single-organism cellular process
ncbi_106363556	LOC106363556	0	2.45	2.13	0	0	0	0.05	0	0.13	0.06	0	1.5267	10.57616938	0.000371965	0.020740856	-4.669278787	0.00966166	0.117186441	BnaC05g44950D [Brassica napus]	-	GO:0044437//vacuolar part	-	-
[truncated: 4,107 more rows]
