# Supplementary material for: Effects of Low Nighttime Temperature on Fatty Acid Content in Developing Seeds from Brassica napus L. Based on RNA-Seq and Metabolome
Source: Plants (Basel). 2023 Jan 10;12(2):325. doi: 10.3390/plants12020325 (PMC9862530; doi:10.3390/plants12020325)
Supplement: Supplementary file 1 [file plants-12-00325-s001.zip › Table S7.xls]

Table S7 Analysis of DEGs from STSL in LNT
id	Symbol	OFE13-1	OFE13-2	OFE13-3	OSE13-1	OSE13-2	OSE13-3	OTE13-1	OTE13-2	OTE13-3	OTE13	OSE13	OFE13	OSE13-vs-OFE13-log2fc	OSE13-vs-OFE13-pvalue	OSE13-vs-OFE13-fdr	OFE13-vs-OTE13-log2fc	OFE13-vs-OTE13-pvalue	OFE13-vs-OTE13-fdr	Description	Pathway	GO Component	GO Function	GO Process
MSTRG.10026	--	0	0	0	0	3.72	2.97	0	0	0	0	2.23	0	-11.12282799	0.001758182	0.018143539	0	1	1	hypothetical protein HID58_001303 [Brassica napus]	-	-	-	-
MSTRG.10198	At5g54220	0	0	0	0.26	3.88	1.93	0	0	0	0	2.0233	0	-10.9825183	0.000125519	0.001973812	0	1	1	PREDICTED: defensin-like protein 69 [Brassica oleracea var. oleracea] [Brassica oleracea]	-	-	-	GO:0048869//cellular developmental process
MSTRG.10432	NET4B	51.1	28.8	27.26	12.63	8.75	2.79	59.17	49.19	30.41	46.2567	8.0567	35.72	2.148477108	2.78E-07	8.91E-06	0.372929226	0.027250114	0.263174314	protein NETWORKED 4B-like [Brassica rapa]	-	-	-	-
MSTRG.10815	PI1	0.94	0.13	0.57	0.08	0	0	4.37	3.99	2.67	3.6767	0.0267	0.5467	4.357552005	0.001372193	0.014800141	2.749665071	6.36E-06	0.000359593	protease inhibitor HPI [Brassica napus]	-	GO:0030312//external encapsulating structure	GO:0004866//endopeptidase inhibitor activity;GO:0016787//hydrolase activity	GO:0006812//cation transport;GO:0006950//response to stress;GO:0009620//response to fungus;GO:0010466//negative regulation of peptidase activity
MSTRG.10948	--	5.92	6.15	6.8	18.8	18.72	25.19	0.7	1.28	0.57	0.85	20.9033	6.29	-1.732601097	5.83E-06	0.000135464	-2.887525271	4.20E-05	0.0017591	transmembrane protein [Arabidopsis thaliana]	-	-	-	-
MSTRG.10949	--	16.05	14.15	33.48	52.23	30.54	48.71	1.65	2.58	5.06	3.0967	43.8267	21.2267	-1.045931121	0.309572045	0.736027353	-2.777089834	0.000536119	0.014414662	transmembrane protein [Arabidopsis thaliana]	-	-	-	-
MSTRG.10986	--	0	0	0.03	1.07	0.43	2.18	0	0	0	0	1.2267	0.01	-6.938599455	4.11E-05	0.000747169	-3.321928095	0.982006263	0.999767122	BnaA09g17170D [Brassica napus]	ko04144//Endocytosis	GO:0036452//ESCRT complex	-	GO:0006305//DNA alkylation;GO:0006810//transport;GO:0007017//microtubule-based process;GO:0008104//protein localization;GO:0034968//histone lysine methylation;GO:1902410//mitotic cytokinetic process
MSTRG.11098	SPH11	2.3	2.2	5.22	10.6	4.1	9.18	0.37	0.52	0.56	0.4833	7.96	3.24	-1.296774618	0.173178745	0.53793782	-2.744903414	8.66E-05	0.00321663	PREDICTED: pentatricopeptide repeat-containing protein At1g10270-like [Brassica oleracea var. oleracea] [Brassica oleracea]	-	GO:0043231//intracellular membrane-bounded organelle	GO:0005488//binding	GO:0001101//response to acid chemical;GO:0009793//embryo development ending in seed dormancy;GO:0010467//gene expression;GO:0016070//RNA metabolic process;GO:0044763//single-organism cellular process
MSTRG.11142	--	0.61	2.3	0	34.41	144.66	45.72	0	0	0	0	74.93	0.97	-6.271414894	6.96E-05	0.001187243	-9.921840937	0.130783166	0.643983331	pollen coat protein B13 [Brassica oleracea]	-	-	-	-
MSTRG.1133	At4g18593	0.84	0.68	0.95	3.09	2.14	3.49	0.87	0.28	0.57	0.5733	2.9067	0.8233	-1.819817093	0.000135386	0.002101624	-0.522102477	0.920926203	0.999767122	BnaCnng33340D [Brassica napus]	-	-	GO:0097159//organic cyclic compound binding	-
MSTRG.11644	--	1.72	0.79	1.85	15.9	19.66	14.74	0	0	0.45	0.15	16.7667	1.4533	-3.52815836	3.42E-15	3.60E-13	-3.276331228	0.069431835	0.465627281	BnaCnng68060D [Brassica napus]	-	-	-	-
MSTRG.11740	At4g01450	5.38	6.38	8.02	2.76	1.84	2.36	0.18	0.21	0.8	0.3967	2.32	6.5933	1.506883215	3.19E-17	4.28E-15	-4.055008947	5.47E-08	5.94E-06	WAT1-related protein At4g01450 [Brassica rapa]	-	-	-	-
MSTRG.11742	At4g01450	6.5	8.3	8.47	3.2	5.59	1.27	0.65	1	1.51	1.0533	3.3533	7.7567	1.209840906	0.000263673	0.003698782	-2.880474747	3.89E-08	4.38E-06	WAT1-related protein At4g01450 isoform X1 [Brassica rapa]	-	-	-	-
MSTRG.11848	--	0	0	0	0	2.08	4.13	0	0.12	0	0.04	2.07	0	-11.01541505	0.004669575	0.040145237	5.321928095	0.653539287	0.999767122	transmembrane protein [Arabidopsis thaliana]	-	-	-	-
MSTRG.11868	TPLATE	0.66	0.38	0.94	0.65	3.14	0.75	4.19	0.84	1.23	2.0867	1.5133	0.66	-1.197191867	0.443446207	0.862953712	1.660662227	0.002341193	0.045469281	serine/threonine-protein phosphatase 6 regulatory ankyrin repeat subunit B [Brassica rapa]	-	-	-	-
MSTRG.1209	--	0.16	0	0.34	0	0	0	0.87	1.46	4.95	2.4267	0	0.1667	7.380821784	0.165330704	0.524470665	3.86393845	0.000241142	0.00751804	-	-	-	-	-
MSTRG.1214	ATTI7	1.57	0.84	0.59	6.3	8.3	2.89	0	0	0	0	5.83	1	-2.543495883	0.001868241	0.019065652	-9.965784285	0.001524237	0.032724677	BnaA04g25120D [Brassica napus]	-	-	-	GO:0006950//response to stress;GO:0009620//response to fungus
MSTRG.1215	ATTI1	0.63	0.51	1.02	5.78	5.55	14.63	0	0	0	0	8.6533	0.72	-3.587187166	1.88E-06	4.97E-05	-9.491853096	0.01115843	0.144613234	BnaC04g48990D [Brassica napus]	-	-	-	GO:0006950//response to stress;GO:0009620//response to fungus
MSTRG.12265	UBP13	5.27	7.25	6.28	12.96	23.97	15.06	4.13	4.54	4.54	4.4033	17.33	6.2667	-1.467501493	0.002567099	0.02483247	-0.509102195	0.710999098	0.999767122	ubiquitin carboxyl-terminal hydrolase 13 isoform X2 [Brassica rapa]	-	GO:0005911//cell-cell junction;GO:0043231//intracellular membrane-bounded organelle;GO:0044444//cytoplasmic part	GO:0070011//peptidase activity, acting on L-amino acid peptides	GO:0006006//glucose metabolic process;GO:0009606//tropism;GO:0019941//modification-dependent protein catabolic process
MSTRG.12863	--	0.28	0	0.38	2.94	1.15	8.76	0	0	0	0	4.2833	0.22	-4.283158525	0.001215729	0.013417385	-7.781359714	0.408439337	0.976219468	PREDICTED: leucine-rich repeat extensin-like protein 5 [Raphanus sativus]	-	-	-	-
MSTRG.13032	GAD4	0.12	0.68	1.12	2.51	4.25	5.15	0.11	0	0	0.0367	3.97	0.64	-2.632995197	0.006141692	0.049983441	-4.125530882	0.023884622	0.242064436	glutamate decarboxylase 4 [Brassica rapa]	ko01100//Metabolic pathways;ko01110//Biosynthesis of secondary metabolites;ko00250//Alanine, aspartate and glutamate metabolism;ko00410//beta-Alanine metabolism;ko00650//Butanoate metabolism;ko00430//Taurine and hypotaurine metabolism	GO:0043231//intracellular membrane-bounded organelle;GO:0044444//cytoplasmic part	GO:0005515//protein binding;GO:0016705//oxidoreductase activity, acting on paired donors, with incorporation or reduction of molecular oxygen;GO:0016831//carboxy-lyase activity;GO:0043168//anion binding;GO:0043169//cation binding	GO:0006605//protein targeting;GO:0006873//cellular ion homeostasis;GO:0006970//response to osmotic stress;GO:0009064//glutamine family amino acid metabolic process;GO:0009746//response to hexose;GO:0009891//positive regulation of biosynthetic process;GO:0010038//response to metal ion;GO:0030001//metal ion transport;GO:0042044//fluid transport;GO:0043067//regulation of programmed cell death
MSTRG.13033	GAD4	0	0.61	0.29	1.96	2.48	4.11	0	0	0	0	2.85	0.3	-3.247927513	0.003408985	0.03119067	-8.22881869	0.409860159	0.976908184	Glutamate decarboxylase [Morella rubra]	ko01100//Metabolic pathways;ko01110//Biosynthesis of secondary metabolites;ko00250//Alanine, aspartate and glutamate metabolism;ko00410//beta-Alanine metabolism;ko00650//Butanoate metabolism;ko00430//Taurine and hypotaurine metabolism	GO:0043231//intracellular membrane-bounded organelle;GO:0044444//cytoplasmic part	GO:0005515//protein binding;GO:0016705//oxidoreductase activity, acting on paired donors, with incorporation or reduction of molecular oxygen;GO:0016831//carboxy-lyase activity;GO:0043168//anion binding;GO:0043169//cation binding	GO:0001101//response to acid chemical;GO:0006605//protein targeting;GO:0006873//cellular ion homeostasis;GO:0006970//response to osmotic stress;GO:0009064//glutamine family amino acid metabolic process;GO:0009746//response to hexose;GO:0009891//positive regulation of biosynthetic process;GO:0010038//response to metal ion;GO:0015698//inorganic anion transport;GO:0030001//metal ion transport;GO:003…
MSTRG.13041	--	1.12	1.85	0.98	12.28	98.95	29.39	0	0.95	0	0.3167	46.8733	1.3167	-5.153805336	2.81E-09	1.33E-07	-2.055853235	0.42407353	0.985440413	PREDICTED: defensin-like protein 10 [Camelina sativa]	-	-	-	-
MSTRG.13134	--	1.03	0.55	0.08	0	0	0	0.74	0.25	0.1	0.3633	0	0.5533	9.112005026	0.000107276	0.001729222	-0.606855107	0.962911396	0.999767122	probable inactive serine/threonine-protein kinase fnkC [Brassica rapa]	-	-	-	-
MSTRG.1314	--	0.03	0	0	0.08	0.03	0	1.27	1	0.73	1	0.0367	0.01	-1.874469118	0.686436809	0.960992109	6.64385619	8.02E-08	8.20E-06	hypothetical protein IGI04_001030 [Brassica rapa subsp. trilocularis] [Brassica rapa]	-	-	-	-
MSTRG.13220	ICL	1.92	3.25	0.22	0.02	0.32	0.02	19.26	64.15	4.18	29.1967	0.12	1.7967	3.904216461	0.000259752	0.003653426	4.022408991	2.90E-05	0.001290885	isocitrate lyase [Brassica rapa]	ko01100//Metabolic pathways;ko01110//Biosynthesis of secondary metabolites;ko01200//Carbon metabolism;ko00630//Glyoxylate and dicarboxylate metabolism	GO:0005777//peroxisome	GO:0016833//oxo-acid-lyase activity	GO:0003006//developmental process involved in reproduction;GO:0006101//citrate metabolic process;GO:0044262//cellular carbohydrate metabolic process
MSTRG.13400	--	0.12	0	0	0.4	8.64	1.59	0	0	0	0	3.5433	0.04	-6.468963381	0.000452087	0.005835183	-5.321928095	0.812238488	0.999767122	BnaC03g66980D [Brassica napus]	-	-	-	-
MSTRG.13549	PDV2	3.65	3.86	3.84	5.72	4.6	7.54	1.05	1.14	1.58	1.2567	5.9533	3.7833	-0.654039783	0.899188827	0.987600447	-1.590055869	0.00222939	0.043884013	plastid division protein PDV2 isoform X2 [Brassica rapa]	-	GO:0031355//integral component of plastid outer membrane	GO:0005488//binding	GO:0048285//organelle fission
MSTRG.13709	--	9.22	9.44	3.23	3.07	3.84	1.9	6.13	6.26	1.59	4.66	2.9367	7.2967	1.31305803	0.00012024	0.001904239	-0.646907594	0.951620549	0.999767122	unnamed protein product, partial [Brassica rapa]	-	-	-	-
MSTRG.13929	--	0.21	0.3	0.31	1.9	5.22	1.53	0	0.06	0	0.02	2.8833	0.2733	-3.399004318	5.75E-05	0.001003938	-3.772589504	0.040889944	0.339466989	BnaC02g11740D [Brassica napus]	-	-	-	-
MSTRG.14003	At4g09580	4.67	5.7	6.75	0.4	0.11	0.24	5.06	5.39	11.74	7.3967	0.25	5.7067	4.512648296	6.13E-30	2.86E-27	0.374226966	0.035123879	0.307996011	uncharacterized membrane protein At4g09580 [Brassica rapa]	-	GO:0043231//intracellular membrane-bounded organelle	-	GO:0046474//glycerophospholipid biosynthetic process
MSTRG.14148	TPS07	85.37	72.03	124.27	4.44	3.33	1.96	69.64	6.77	121.41	65.94	3.2433	93.89	4.855422299	1.80E-51	2.83E-48	-0.509817621	0.951361942	0.999767122	Terpenoid cyclases/protein prenyltransferase alpha-alpha toroid [Arabidopsis suecica]	-	GO:0005911//cell-cell junction;GO:0009536//plastid	-	GO:0006714//sesquiterpenoid metabolic process;GO:0046246//terpene biosynthetic process
MSTRG.14149	TPS26	8.25	0	16.64	0.17	0	0.1	6.42	0.02	4.56	3.6667	0.09	8.2967	6.526463013	0.00411341	0.03631055	-1.178062707	0.748884573	0.999767122	Terpenoid cyclases/Protein prenyltransferases superfamily protein [Arabidopsis thaliana]	-	GO:0005911//cell-cell junction;GO:0009536//plastid	GO:0016838//carbon-oxygen lyase activity, acting on phosphates	GO:0006714//sesquiterpenoid metabolic process;GO:0009664//plant-type cell wall organization;GO:0046246//terpene biosynthetic process
MSTRG.14150	TPS07	37.64	36.76	60.25	1.47	0.98	1.55	28.31	1.21	54.39	27.97	1.3333	44.8833	5.07307042	4.20E-78	2.38E-74	-0.68229957	0.901366766	0.999767122	Terpenoid cyclases/protein prenyltransferase alpha-alpha toroid [Arabidopsis suecica]	-	GO:0009536//plastid	GO:0016829//lyase activity	GO:0046246//terpene biosynthetic process
MSTRG.14314	--	0.78	0.24	0.51	6.01	5.92	10.81	0	0	0.04	0.0133	7.58	0.51	-3.893628696	1.52E-09	7.51E-08	-5.257387843	0.013617848	0.165639406	BnaA03g45780D [Brassica napus]	-	-	-	-
MSTRG.14317	--	0.09	0	0.05	2.17	3.27	3.67	0.1	0.06	0	0.0533	3.0367	0.0467	-6.023952322	2.36E-08	9.34E-07	0.192645078	0.73046619	0.999767122	BnaA03g45780D [Brassica napus]	-	-	-	-
MSTRG.14393	--	8.73	7.78	7.87	4.05	2.29	2.09	3.68	2.52	3.55	3.25	2.81	8.1267	1.53209359	2.84E-13	2.35E-11	-1.322224002	0.002212422	0.043634376	hypothetical protein IGI04_013130, partial [Brassica rapa subsp. trilocularis] [Brassica rapa]	-	-	-	-
MSTRG.14487	--	0.47	0.71	1.69	0.04	0.27	0.36	0.93	5	0.52	2.15	0.2233	0.9567	2.098817736	0.001715388	0.017786165	1.168248424	0.073684366	0.480739019	hypothetical protein N665_0276s0003 [Sinapis alba]	-	-	-	-
MSTRG.14637	--	0	0	0	1.13	0.81	1.14	0	0	0	0	1.0267	0	-10.00375213	0.000114725	0.001831229	0	1	1	BnaCnng50670D [Brassica napus]	-	-	-	-
MSTRG.14844	--	2.11	2.91	1.35	1.43	2.4	0.67	0.34	0.25	0.2	0.2633	1.5	2.1233	0.501368371	0.052350019	0.249397746	-3.011368814	0.000167898	0.005598936	glutathione hydrolase 3-like [Brassica rapa]	-	-	-	-
MSTRG.14866	SCT	1.81	0.24	1.86	0	0	0	2.26	1.72	5.62	3.2	0	1.3033	10.34799039	5.33E-08	1.98E-06	1.295865798	0.031426968	0.287279213	BnaA03g49740D [Brassica napus]	-	-	GO:0016410//N-acyltransferase activity	GO:0044710//single-organism metabolic process;GO:0044763//single-organism cellular process;GO:0045491//xylan metabolic process;GO:0050896//response to stimulus
MSTRG.14893	VLN4	2.39	3.33	3.03	7.64	7.16	7.8	1.6	1.41	1.24	1.4167	7.5333	2.9167	-1.368967851	1.10E-06	3.09E-05	-1.041820176	0.093640775	0.546233174	villin-4 [Brassica rapa]	-	GO:0043232//intracellular non-membrane-bounded organelle;GO:0044444//cytoplasmic part	GO:0003779//actin binding	GO:0001101//response to acid chemical;GO:0022607//cellular component assembly;GO:0030835//negative regulation of actin filament depolymerization;GO:0046907//intracellular transport;GO:0048588//developmental cell growth
MSTRG.14954	--	24.95	29.78	25.4	53.79	54.55	53.94	18.99	11.18	14.19	14.7867	54.0933	26.71	-1.018070826	7.20E-05	0.001221251	-0.853083111	0.278706129	0.874818944	hypothetical protein F2Q69_00039146 [Brassica cretica]	-	-	-	-
MSTRG.14983	--	6.19	3.95	7.12	2.09	1.99	1.17	2.92	2.71	3.39	3.0067	1.75	5.7533	1.717043137	1.33E-12	1.02E-10	-0.936233126	0.297585064	0.894133211	BnaC01g21130D [Brassica napus]	-	-	-	-
MSTRG.15030	MYB3R1	0.58	0.89	0.7	2.07	1.71	1.62	0.42	0.19	0.47	0.36	1.8	0.7233	-1.315264365	0.004124763	0.036391873	-1.00666373	0.36080198	0.947385086	BnaA03g52170D [Brassica napus]	-	GO:0043231//intracellular membrane-bounded organelle	GO:0001071//nucleic acid binding transcription factor activity;GO:0003676//nucleic acid binding;GO:0003712//transcription cofactor activity	GO:0010468//regulation of gene expression;GO:1902410//mitotic cytokinetic process
MSTRG.15146	--	21.36	33.63	76.92	85.35	69.27	93.3	2.23	3.84	9.39	5.1533	82.64	43.97	-0.910320722	0.529119157	0.918310231	-3.092941714	0.000635025	0.016526877	transmembrane protein [Arabidopsis thaliana]	-	-	-	-
MSTRG.15279	GSTT3	2.73	1.52	4.58	0.89	0.53	0.41	1.21	0	1.21	0.8067	0.61	2.9433	2.270569789	3.65E-05	0.000672889	-1.86740639	0.240438466	0.829128351	PREDICTED: glutathione S-transferase T3-like [Brassica oleracea var. oleracea] [Brassica oleracea]	-	-	-	-
MSTRG.15327	PDF3.2	0	0.25	0	0.31	15.57	1.24	0	0	0	0	5.7067	0.0833	-6.097610797	0.002208701	0.021895374	-6.380821784	0.693837666	0.999767122	defensin-like protein 182 [Brassica rapa]	-	-	-	GO:0006950//response to stress;GO:0051704//multi-organism process
MSTRG.15375	FH7	0.71	0.39	0.54	0.87	0.59	0.56	1.1	1.05	1.27	1.14	0.6733	0.5467	-0.300659478	0.40968601	0.833537118	1.06030051	8.49E-05	0.003163148	formin-like protein 7 isoform X2 [Brassica rapa]	-	GO:0016020//membrane;GO:0030054//cell junction;GO:0043231//intracellular membrane-bounded organelle	GO:0003779//actin binding	GO:0002252//immune effector process;GO:0006812//cation transport;GO:0007015//actin filament organization;GO:0007049//cell cycle;GO:0009404//toxin metabolic process;GO:0009826//unidimensional cell growth;GO:0010243//response to organonitrogen compound;GO:0010467//gene expression;GO:0014070//response to organic cyclic compound;GO:0046942//carboxylic acid transport
MSTRG.15529	LCR30	12.82	35.06	35.74	22.41	34.08	21.74	3	4.38	8.1	5.16	26.0767	27.8733	0.096126078	0.095984418	0.374849534	-2.433442572	0.002585856	0.049016893	defensin-like protein 122 [Eutrema salsugineum]	-	-	-	-
MSTRG.15544	--	2.86	3.77	0.12	0.3	0	0	0.61	0.29	0.61	0.5033	0.1	2.25	4.491853096	0.002451121	0.023879251	-2.160338953	0.211725936	0.791410459	expressed protein [Arabidopsis lyrata subsp. lyrata] [Arabidopsis lyrata]	-	-	-	-
MSTRG.15549	--	12.2	4.52	3.8	127.92	104.19	33.05	0	0	0	0	88.3867	6.84	-3.691760522	1.22E-06	3.39E-05	-12.73978061	7.42E-07	5.68E-05	-	-	-	-	-
MSTRG.15809	ADPG2	6.53	8.05	6.53	1.55	0.9	0.94	4.95	4.34	5.02	4.77	1.13	7.0367	2.6385694	4.90E-37	3.85E-34	-0.560902907	0.873540929	0.999767122	PREDICTED: polygalacturonase ADPG1-like [Raphanus sativus]	ko01100//Metabolic pathways;ko00040//Pentose and glucuronate interconversions	GO:0030312//external encapsulating structure;GO:0044424//intracellular part	GO:0004553//hydrolase activity, hydrolyzing O-glycosyl compounds	GO:0000904//cell morphogenesis involved in differentiation;GO:0003006//developmental process involved in reproduction;GO:0007275//multicellular organism development;GO:0009827//plant-type cell wall modification;GO:0009900//dehiscence;GO:0044238//primary metabolic process
MSTRG.15847	UBA2A	0.77	0.74	0.61	0.11	0.16	0.06	0.21	0.06	0.26	0.1767	0.11	0.7067	2.683526335	4.28E-09	1.97E-07	-2	0.03240255	0.292697645	UBP1-associated protein 2A [Eutrema salsugineum]	ko03040//Spliceosome	GO:0043231//intracellular membrane-bounded organelle;GO:0044444//cytoplasmic part	GO:0003723//RNA binding	GO:0006950//response to stress;GO:0009692//ethylene metabolic process;GO:0009755//hormone-mediated signaling pathway;GO:0010260//organ senescence;GO:0016265//death
MSTRG.15894	--	1.93	1.39	1.89	0.4	0.4	0.2	2.42	3.69	3.13	3.08	0.3333	1.7367	2.381283373	1.33E-09	6.65E-08	0.826609479	0.000557614	0.014854018	hypothetical protein F2Q68_00014014 [Brassica cretica]	-	-	-	-
MSTRG.15929	--	0.1	0.11	0.23	2.14	0.74	2.37	0	0	0	0	1.75	0.1467	-3.576741994	0.005494265	0.045717044	-7.196397213	0.536346051	0.999767122	bidirectional sugar transporter SWEET13 isoform X2 [Brassica napus]	-	-	-	-
MSTRG.15990	--	2.9	2.6	3.06	1.01	1.24	1.11	1.32	2.02	1.9	1.7467	1.12	2.8533	1.349149564	5.24E-21	1.04E-18	-0.708043985	0.722609747	0.999767122	-	-	-	-	-
MSTRG.16463	BHLH71	2.8	2.6	0.38	0.46	0.38	0.07	0.75	0.1	0.35	0.4	0.3033	1.9267	2.667131042	0.000229253	0.00329146	-2.268035087	0.084311808	0.517029445	PREDICTED: transcription factor bHLH71 [Brassica oleracea var. oleracea] [Brassica oleracea]	-	GO:0043231//intracellular membrane-bounded organelle	GO:0001071//nucleic acid binding transcription factor activity;GO:0003676//nucleic acid binding;GO:0005515//protein binding	GO:0010468//regulation of gene expression;GO:0034645//cellular macromolecule biosynthetic process;GO:0044707//single-multicellular organism process
MSTRG.16555	--	3.84	3.47	5.17	6.3	8.04	4.42	0.97	0.47	0.96	0.8	6.2533	4.16	-0.588041894	0.911176444	0.987600447	-2.378511623	0.000370383	0.010699451	hypothetical protein IGI04_012476 [Brassica rapa subsp. trilocularis] [Brassica rapa]	-	-	-	-
MSTRG.16565	TPS09	0.18	0.14	0.1	0	0	0	1.3	2.65	1.02	1.6567	0	0.14	7.129283017	9.54E-05	0.001559549	3.564784619	3.14E-10	6.17E-08	BnaA08g30440D [Brassica napus]	-	GO:0005911//cell-cell junction;GO:0009536//plastid	GO:0016838//carbon-oxygen lyase activity, acting on phosphates	GO:0006714//sesquiterpenoid metabolic process;GO:0009664//plant-type cell wall organization;GO:0046246//terpene biosynthetic process
MSTRG.16635	--	5.11	2.93	6.15	1.75	0.75	0.92	7.46	5.57	9.05	7.36	1.14	4.73	2.052806359	5.29E-08	1.96E-06	0.637865583	0.004033876	0.069302666	hypothetical protein HID58_061944 [Brassica napus]	-	-	-	-
MSTRG.16675	MIPS	23.37	41.18	29.11	7.48	14.6	7.85	25.7	39.56	26.63	30.63	9.9767	31.22	1.645840759	3.40E-11	2.14E-09	-0.02752517	0.116075366	0.610704312	inositol-3-phosphate synthase [Brassica rapa]	ko01100//Metabolic pathways;ko00562//Inositol phosphate metabolism	GO:0043231//intracellular membrane-bounded organelle	GO:0005488//binding;GO:0016872//intramolecular lyase activity	GO:0000302//response to reactive oxygen species;GO:0002252//immune effector process;GO:0003006//developmental process involved in reproduction;GO:0006020//inositol metabolic process;GO:0006658//phosphatidylserine metabolic process;GO:0006787//porphyrin-containing compound catabolic process;GO:0009267//cellular response to starvation;GO:0009617//response to bacterium;GO:0009620//response to fungus…
MSTRG.16745	--	0.53	0.57	0.32	0.23	0.06	0.16	0.14	0.51	0.27	0.3067	0.15	0.4733	1.657894023	0.000438381	0.005681571	-0.626185163	0.983399752	0.999767122	BnaA08g11660D [Brassica napus]	-	-	-	-
MSTRG.16842	--	0.42	2.19	0.64	0	0.21	0	0.17	0.14	0	0.1033	0.07	1.0833	3.951978485	0.001300023	0.014164427	-3.390099598	0.018565288	0.20406147	unnamed protein product [Brassica napus]	-	-	-	-
MSTRG.16843	--	1.54	3.7	3.85	0.23	0.85	0.83	1.23	2	1.39	1.54	0.6367	3.03	2.250707656	3.65E-06	8.99E-05	-0.976387443	0.520144756	0.999767122	unnamed protein product [Brassica rapa]	-	-	-	-
MSTRG.16851	LCR46	0	0	0	2.66	7.34	0.1	0	0	0	0	3.3667	0	-11.71710517	0.000957085	0.010933461	0	1	1	defensin-like protein 91 [Capsella rubella]	-	-	-	-
MSTRG.17105	At1g21990	0.97	1.12	0	0	0	0	0.46	0.05	0.29	0.2667	0	0.6967	9.444324726	0.00214364	0.021361243	-1.385431037	0.595039918	0.999767122	F-box/LRR-repeat protein At2g29930-like [Brassica rapa]	-	-	-	-
MSTRG.17327	At1g47710	0	0	0	0.04	7.58	3.86	0	0	0	0	3.8267	0	-11.90187252	1.13E-05	0.000241621	0	1	1	PREDICTED: serpin-ZX-like [Brassica oleracea var. oleracea] [Brassica oleracea]	-	-	-	-
MSTRG.17605	--	1.93	0.37	0.14	0.07	0	0	7.34	0.99	0.4	2.91	0.0233	0.8133	5.123382416	0.000275013	0.003834439	1.839100506	0.062976496	0.440024506	hypothetical protein Bca52824_044908 [Brassica carinata]	-	-	-	-
MSTRG.17676	--	0.15	2.15	0.5	8.7	10.97	8.92	0.22	0.57	0.15	0.3133	9.53	0.9333	-3.352011888	0.000924422	0.010601665	-1.574694165	0.60038613	0.999767122	exopolygalacturonase-like [Brassica napus]	-	-	GO:0004553//hydrolase activity, hydrolyzing O-glycosyl compounds	GO:0044238//primary metabolic process
MSTRG.18287	--	0	0	0.11	1.86	1.63	0.6	0	0	0	0	1.3633	0.0367	-5.216525414	0.002773172	0.026437845	-5.196397213	0.982006263	0.999767122	unnamed protein product [Brassica napus]	-	-	-	-
MSTRG.1837	--	0	0	0.12	0.3	12.06	3.65	0	0	0	0	5.3367	0.04	-7.059795092	0.000373068	0.004947726	-5.321928095	0.982006263	0.999767122	defensin-like protein 295 [Brassica rapa]	-	-	-	-
MSTRG.18452	--	0	0	0.06	0.5	1.1	0.84	0	0	0	0	0.8133	0.02	-5.345774837	0.000743218	0.008840192	-4.321928095	0.982006263	0.999767122	Neprosin activation peptide [Arabidopsis thaliana x Arabidopsis arenosa]	-	GO:0031301//integral component of organelle membrane;GO:0044434//chloroplast part	GO:0005488//binding	GO:0006351//transcription, DNA-templated;GO:0006950//response to stress;GO:0009314//response to radiation
MSTRG.18640	ULP1D	0.07	0.15	0.3	1.34	2.23	1.8	0.12	0.09	0.02	0.0767	1.79	0.1733	-3.36833856	8.57E-07	2.46E-05	-1.176877762	0.618770919	0.999767122	BnaAnng03310D [Brassica napus]	-	GO:0005634//nucleus	GO:0019783//ubiquitin-like protein-specific protease activity	GO:0003006//developmental process involved in reproduction;GO:0006970//response to osmotic stress;GO:0018205//peptidyl-lysine modification;GO:0042743//hydrogen peroxide metabolic process;GO:0045491//xylan metabolic process
MSTRG.18693	--	1.4	1.66	1.5	3.15	3.93	3.08	0.26	0.16	0.25	0.2233	3.3867	1.52	-1.155794673	0.030642462	0.17002005	-2.766800824	5.32E-05	0.002152392	LOW QUALITY PROTEIN: hypothetical protein HID58_022173, partial [Brassica napus]	-	-	-	-
MSTRG.19089	--	2.9	2.01	2.47	1.73	1.09	1.96	5.85	10.03	7.81	7.8967	1.5933	2.46	0.626610198	0.000605476	0.007506049	1.682585477	1.06E-08	1.38E-06	hypothetical protein DY000_02058152 [Brassica cretica]	-	-	-	-
MSTRG.19163	--	1.98	2.08	2.36	7.74	7.94	7.34	0.89	0.45	0.7	0.68	7.6733	2.14	-1.842242631	1.19E-06	3.33E-05	-1.654004145	0.055206807	0.407043954	LEAF RUST 10 DISEASE-RESISTANCE LOCUS RECEPTOR-LIKE PROTEIN KINASE-like 1.1 isoform X1 [Brassica napus]	-	-	-	-
MSTRG.19214	--	0.82	0.48	0.56	0	0	0	12.41	8.24	6.78	9.1433	0	0.62	9.276124405	5.04E-05	0.000893623	3.882380096	2.35E-18	3.03E-15	PREDICTED: cytochrome b561 and DOMON domain-containing protein At3g07570-like [Raphanus sativus]	-	-	-	-
MSTRG.19228	--	0	0	0	0.24	0.3	0.57	0	0.22	0.22	0.1467	0.37	0	-8.531381461	0.002923965	0.027630544	7.196397213	0.142556727	0.669420577	mitotic spindle checkpoint protein BUBR1-like [Brassica napus]	-	-	-	-
MSTRG.1936	NPF5.2	102.98	82.22	78.3	8.95	4.97	2.45	64.29	52.54	77.34	64.7233	5.4567	87.8333	4.008676735	4.32E-25	1.21E-22	-0.440482646	0.572230913	0.999767122	protein NRT1/ PTR FAMILY 5.2 isoform X1 [Brassica rapa]	-	GO:0031224//intrinsic component of membrane	-	GO:0015833//peptide transport;GO:0051707//response to other organism
MSTRG.1937	NPF5.2	2.6	1.72	1.26	0.27	0	0.31	1.29	1.06	1.95	1.4333	0.1933	1.86	3.266140317	6.53E-06	0.000149628	-0.375928462	0.696987762	0.999767122	PREDICTED: protein NRT1/ PTR FAMILY 5.2 isoform X2 [Musa acuminata subsp. malaccensis] [Musa acuminata]	-	GO:0031224//intrinsic component of membrane	-	GO:0015833//peptide transport;GO:0051707//response to other organism
MSTRG.19557	ACT1	3.37	3.61	2.99	2.77	2.58	2.67	0.88	0.68	1.27	0.9433	2.6733	3.3233	0.313991268	6.95E-07	2.04E-05	-1.816791452	0.000701612	0.017916287	LOW QUALITY PROTEIN: actin-like [Brassica rapa]	-	-	-	-
MSTRG.19622	--	0.07	1.87	0.93	1.33	0.76	1.08	0	0.03	0	0.01	1.0567	0.9567	-0.143432103	0.628611924	0.959636228	-6.579944426	0.001190431	0.027106155	-	-	-	-	-
MSTRG.19762	F-ATMBP	230.91	275.46	190.99	34.24	25.07	6.89	496.61	731.25	400.33	542.73	22.0667	232.4533	3.397000493	5.24E-13	4.18E-11	1.223293543	7.07E-07	5.46E-05	jacalin-related lectin 34 isoform X1 [Brassica rapa]	-	GO:0043231//intracellular membrane-bounded organelle	-	GO:0003006//developmental process involved in reproduction;GO:0006950//response to stress;GO:0044699//single-organism process
MSTRG.19763	JAL5	44.18	50.61	38.41	6.57	4.79	1.3	94.85	128.49	69.88	97.74	4.22	44.4	3.395244773	1.73E-14	1.67E-12	1.138389428	7.71E-07	5.84E-05	jacalin-related lectin 34 isoform X2 [Brassica rapa]	-	GO:0005911//cell-cell junction;GO:0043231//intracellular membrane-bounded organelle;GO:0044444//cytoplasmic part	GO:0046914//transition metal ion binding	GO:0001101//response to acid chemical;GO:0006950//response to stress;GO:0007165//signal transduction;GO:0009628//response to abiotic stimulus;GO:0009725//response to hormone;GO:0019759//glycosinolate catabolic process;GO:0044271//cellular nitrogen compound biosynthetic process;GO:0050790//regulation of catalytic activity
MSTRG.19811	--	0.27	0.22	0.09	2.24	0.95	1.54	0.18	0	0.11	0.0967	1.5767	0.1933	-3.027715378	0.000721169	0.008632996	-1	0.754553515	0.999767122	PREDICTED: ankyrin-2-like [Brassica oleracea var. oleracea] [Brassica oleracea]	-	-	-	-
MSTRG.19898	ABCC4	3.25	3.05	2.55	10.53	10.87	9.61	1.59	1.82	1.34	1.5833	10.3367	2.95	-1.808984166	3.15E-16	3.71E-14	-0.897749942	0.290802114	0.887645234	BnaA05g17490D [Brassica napus]	ko02010//ABC transporters	GO:0031224//intrinsic component of membrane	GO:0015405//P-P-bond-hydrolysis-driven transmembrane transporter activity;GO:0016628//oxidoreductase activity, acting on the CH-CH group of donors, NAD or NADP as acceptor;GO:0017111//nucleoside-triphosphatase activity;GO:0032550//purine ribonucleoside binding	GO:0044710//single-organism metabolic process;GO:0044763//single-organism cellular process;GO:0051234//establishment of localization
MSTRG.19973	--	1.21	1.67	0.71	4.75	6.95	4.7	0.11	0.1	0.23	0.1467	5.4667	1.1967	-2.191640066	8.11E-06	0.000180781	-3.028408415	0.001330015	0.029552097	BnaC01g19700D [Brassica napus]	-	-	-	-
MSTRG.20017	At3g58980	0.32	1.23	0.63	0.05	0.27	0.16	0.66	0.3	0.27	0.41	0.16	0.7267	2.183221824	0.001349444	0.014604825	-0.825669819	0.82468683	0.999767122	F-box/LRR-repeat protein At3g58980-like [Brassica rapa]	-	GO:0043231//intracellular membrane-bounded organelle	-	-
MSTRG.20057	--	0.82	0.88	3.46	0.3	0.34	0.57	0.24	0.04	2.56	0.9467	0.4033	1.72	2.092364018	0.000236072	0.003368878	-0.861480136	0.827186718	0.999767122	unnamed protein product [Brassica rapa]	-	-	-	-
MSTRG.20213	--	0.09	0.07	0.08	0.4	0.93	0.73	0	0	0.09	0.03	0.6867	0.08	-3.101538026	0.000869312	0.010072947	-1.415037499	0.593986412	0.999767122	BnaAnng17590D [Brassica napus]	-	-	-	-
MSTRG.20291	DRB3	2.85	4.18	1.62	2.89	2.77	1.18	0.71	0.14	0.18	0.3433	2.28	2.8833	0.338703808	0.054824512	0.257505215	-3.070055795	0.001213552	0.027497043	double-stranded RNA-binding protein 3 isoform X2 [Brassica rapa]	-	-	-	GO:0002252//immune effector process;GO:0030422//production of siRNA involved in RNA interference
MSTRG.20307	CYP705A22	0.02	0.09	0.05	1.87	0.6	1.29	0	0	0.06	0.02	1.2533	0.0533	-4.554588852	2.55E-06	6.54E-05	-1.415037499	0.685986846	0.999767122	cytochrome P450 705A22 [Brassica rapa]	-	-	-	-
MSTRG.20478	--	7.56	9.51	8.54	17.83	19.52	17.27	8.55	0.04	7.96	5.5167	18.2067	8.5367	-1.092722061	0.000366994	0.004876095	-0.629876036	0.945246443	0.999767122	unnamed protein product, partial [Brassica napus]	-	-	-	-
MSTRG.20580	--	0.77	0.51	1.14	5.73	20.72	15.55	0	0.26	0.13	0.13	14	0.8067	-4.117310375	5.53E-08	2.05E-06	-2.633461018	0.134171484	0.650856943	BnaA05g36870D [Brassica napus]	-	-	-	-
MSTRG.20867	--	5.52	3.55	5.59	0.12	0.65	0.16	8.97	12.01	6.34	9.1067	0.31	4.8867	3.978510577	1.90E-11	1.24E-09	0.89807238	0.000929041	0.022389906	LOW QUALITY PROTEIN: pentatricopeptide repeat-containing protein At3g14330 [Arabidopsis lyrata subsp. lyrata] [Arabidopsis lyrata]	-	-	-	-
MSTRG.20883	--	4.68	5.95	5.5	12.12	10.48	13.26	3.5	3	4.3	3.6	11.9533	5.3767	-1.15262905	0.000881761	0.010189414	-0.578715126	0.961622838	0.999767122	BnaA05g12520D [Brassica napus]	-	GO:0005911//cell-cell junction;GO:0043231//intracellular membrane-bounded organelle	-	-
MSTRG.20888	--	0	0.15	0	0.16	0.32	0	0.78	1.46	0.39	0.8767	0.16	0.05	-1.678071905	0.623434204	0.956439661	4.132028394	0.000638398	0.016604056	hypothetical protein BRARA_E01354 [Brassica rapa]	-	-	-	-
MSTRG.20895	--	28.04	42.72	40.56	10.21	13.68	15.56	18.75	39.74	36.92	31.8033	13.15	37.1067	1.496615608	2.94E-18	4.54E-16	-0.222500424	0.356951237	0.944225014	hypothetical protein BRARA_A02645 [Brassica rapa]	-	-	-	-
MSTRG.2126	PORB	17.12	11.77	12.43	75.01	34.83	42.15	3.67	1.74	2.71	2.7067	50.6633	13.7733	-1.879064247	0.000335022	0.004522716	-2.347288622	1.69E-06	0.000115017	protochlorophyllide reductase precursor [Arabidopsis thaliana]	ko01100//Metabolic pathways;ko01110//Biosynthesis of secondary metabolites;ko00860//Porphyrin metabolism	GO:0009527//plastid outer membrane;GO:0031976//plastid thylakoid;GO:0044434//chloroplast part	GO:0016628//oxidoreductase activity, acting on the CH-CH group of donors, NAD or NADP as acceptor	GO:0000097//sulfur amino acid biosynthetic process;GO:0005982//starch metabolic process;GO:0006091//generation of precursor metabolites and energy;GO:0006355//regulation of transcription, DNA-templated;GO:0006779//porphyrin-containing compound biosynthetic process;GO:0009725//response to hormone;GO:0009887//organ morphogenesis;GO:0048869//cellular developmental process
MSTRG.21646	--	0	0	0	6.9	0	4.3	0	0	0	0	3.7333	0	-11.86624861	0.004575813	0.039518002	0	1	1	BnaA06g01490D [Brassica napus]	-	-	-	-
MSTRG.21647	CSLE1	0.55	0.1	0.2	9.95	1.16	9.81	0	0	0.21	0.07	6.9733	0.2833	-4.6212762	1.77E-05	0.000360373	-2.017073513	0.432358051	0.990843854	cellulose synthase-like protein E1 [Brassica napus]	-	-	GO:0016740//transferase activity	-
MSTRG.22318	ACO3	2.65	2.7	2.85	5.13	6.44	5.71	1.6	2.12	1.68	1.8	5.76	2.7333	-1.075407403	0.002154139	0.021440721	-0.602664502	0.991015205	0.999767122	aconitate hydratase 3, mitochondrial [Brassica napus]	ko01100//Metabolic pathways;ko01110//Biosynthesis of secondary metabolites;ko01200//Carbon metabolism;ko01230//Biosynthesis of amino acids;ko00630//Glyoxylate and dicarboxylate metabolism;ko01210//2-Oxocarboxylic acid metabolism;ko00020//Citrate cycle (TCA cycle)	GO:0044424//intracellular part	GO:0016836//hydro-lyase activity;GO:0043169//cation binding;GO:0051536//iron-sulfur cluster binding	GO:0044262//cellular carbohydrate metabolic process
MSTRG.22327	--	0	0.09	0	1.09	0.31	1.59	0	0	0	0	0.9967	0.03	-5.054076673	0.005238146	0.044047387	-4.906890596	0.982006263	0.999767122	unnamed protein product [Brassica napus]	-	-	-	-
MSTRG.22562	--	0.55	0.76	0.93	0.43	0.3	0.15	6.65	2.92	2.07	3.88	0.2933	0.7467	1.347923303	0.009827238	0.072462342	2.377520421	1.08E-05	0.000564492	BnaCnng65690D [Brassica napus]	-	-	-	-
MSTRG.22649	--	0.84	0	0.72	5.5	3.62	5.49	0	0	0.39	0.13	4.87	0.52	-3.227338244	0.004713197	0.040474152	-2	0.578307052	0.999767122	hypothetical protein IGI04_013159 [Brassica rapa subsp. trilocularis] [Brassica rapa]	-	-	-	-
MSTRG.227	CPK28	0.22	0.31	0.24	1.79	2.55	1.59	0.9	0.2	0.3	0.4667	1.9767	0.2567	-2.945101754	0.000469846	0.006027773	0.862496476	0.181719394	0.744003743	calcium-dependent protein kinase 28-like [Brassica napus]	ko04626//Plant-pathogen interaction	-	-	-
MSTRG.23006	--	0.02	0.22	0.04	0.7	22.63	4.32	0	0.05	0	0.0167	9.2167	0.0933	-6.625708843	6.66E-07	1.97E-05	-2.485426827	0.428663433	0.987881424	BnaC06g00390D [Brassica napus]	-	GO:0043231//intracellular membrane-bounded organelle	GO:0005515//protein binding	GO:0000302//response to reactive oxygen species;GO:0009642//response to light intensity;GO:0010468//regulation of gene expression;GO:0015833//peptide transport;GO:0033554//cellular response to stress;GO:0034645//cellular macromolecule biosynthetic process;GO:0044267//cellular protein metabolic process
MSTRG.23116	--	0	0	0	5.15	2.45	3.56	0	0.07	0	0.0233	3.72	0	-11.86108691	1.50E-09	7.45E-08	4.544320516	0.653539287	0.999767122	hypothetical protein HID58_021927, partial [Brassica napus]	-	-	-	-
MSTRG.23167	IQD32	4.8	4.45	6.05	12.77	11.65	13.92	4.09	2.86	3.59	3.5133	12.78	5.1	-1.325318684	6.70E-05	0.001147925	-0.537656786	0.854821063	0.999767122	protein IQ-DOMAIN 32 isoform X1 [Brassica rapa]	-	GO:0009526//plastid envelope;GO:0016020//membrane;GO:0043234//protein complex	-	GO:0000097//sulfur amino acid biosynthetic process;GO:0001101//response to acid chemical;GO:0008380//RNA splicing;GO:0009409//response to cold
MSTRG.23258	LAX2	1.61	2.11	2.76	5.95	7.43	7.48	0.33	0.49	0.85	0.5567	6.9533	2.16	-1.68667344	3.72E-05	0.000685697	-1.95614571	0.011741689	0.149657161	PREDICTED: auxin transporter-like protein 2 isoform X1 [Camelina sativa]	ko04075//Plant hormone signal transduction	GO:0016020//membrane	GO:0022857//transmembrane transporter activity	GO:0009653//anatomical structure morphogenesis;GO:0009725//response to hormone;GO:0010051//xylem and phloem pattern formation;GO:0010817//regulation of hormone levels;GO:0016049//cell growth;GO:0046942//carboxylic acid transport;GO:0048509//regulation of meristem development;GO:0048589//developmental growth;GO:0051707//response to other organism;GO:0071704//organic substance metabolic process
MSTRG.23427	--	30.81	55.77	82.39	129.2	204.18	381.46	11.98	0.17	41.75	17.9667	238.28	56.3233	-2.080853241	0.003151713	0.029332571	-1.648409946	0.390785886	0.966772726	BnaA06g16030D [Brassica napus]	-	-	-	-
MSTRG.23434	--	42.22	30.79	80.75	133.55	76.24	88.99	4.84	4.49	13.39	7.5733	99.5933	51.2533	-0.958403338	0.421853593	0.84447235	-2.758645501	0.000461054	0.012774919	BnaA06g16030D [Brassica napus]	-	-	-	-
MSTRG.23435	--	5.45	4.73	10.51	34.06	25.98	37.87	0.31	1.76	0.91	0.9933	32.6367	6.8967	-2.242522571	1.35E-05	0.000282089	-2.795549409	0.005864707	0.09077867	BnaA06g16040D [Brassica napus]	-	-	-	-
MSTRG.2345	At1g58055	0.21	0	0	0.44	23.89	11.37	0	0	0	0	11.9	0.07	-7.409390936	6.93E-05	0.00118285	-6.129283017	0.812238488	0.999767122	BnaC03g66980D [Brassica napus]	-	-	-	-
MSTRG.23475	--	2.62	2.29	2.49	2.02	2.56	2.48	0.66	0.55	0.82	0.6767	2.3533	2.4667	0.067857087	0.001035381	0.011697382	-1.866045543	0.000165007	0.005516076	BnaC08g21800D [Brassica napus]	ko03420//Nucleotide excision repair;ko03440//Homologous recombination;ko03030//DNA replication;ko03430//Mismatch repair	-	-	-
MSTRG.23584	LCR61	0	0	0	13.46	3.82	5.71	0	0	0	0	7.6633	0	-12.90375634	3.78E-08	1.44E-06	0	1	1	PREDICTED: defensin-like protein 172 [Camelina sativa]	-	-	-	-
MSTRG.23689	--	0.49	0.46	0.23	1.54	6.94	2.65	0.3	0	0	0.1	3.71	0.3933	-3.237594828	0.00059827	0.007434066	-1.975752454	0.412622201	0.978760219	unnamed protein product [Brassica napus]	-	-	-	-
MSTRG.23810	--	0.35	0	0	0.81	2.48	5.29	0.13	0	0	0.0433	2.86	0.1167	-4.615550821	0.005974993	0.048846646	-1.428843299	0.88429029	0.999767122	Retrotransposon gag domain [Arabidopsis thaliana x Arabidopsis arenosa]	-	-	-	-
MSTRG.23850	--	3.23	0.42	0.71	0.09	0.24	0.17	2.28	0.37	0.42	1.0233	0.1667	1.4533	3.124328135	0.000119186	0.001890007	-0.506089479	0.976091067	0.999767122	protein ANTAGONIST OF LIKE HETEROCHROMATIN PROTEIN 1-like [Brassica rapa]	-	-	-	-
MSTRG.2395	--	11.59	9.72	11.35	4.54	3.16	4.27	8.62	10.73	10.39	9.9133	3.99	10.8867	1.448101639	2.61E-26	8.17E-24	-0.135120144	0.06913826	0.464824843	F3M18.15 [Arabidopsis thaliana]	-	-	-	-
MSTRG.24099	SRK6	0.26	0.15	0.28	2.46	2.06	1.64	0.12	0.07	0.07	0.0867	2.0533	0.23	-3.158262084	4.39E-08	1.65E-06	-1.408084739	0.402932102	0.973293015	LOW QUALITY PROTEIN: S-locus-specific glycoprotein S13-like [Brassica rapa]	-	GO:0005911//cell-cell junction;GO:0031224//intrinsic component of membrane;GO:0043231//intracellular membrane-bounded organelle	GO:0004672//protein kinase activity;GO:0032550//purine ribonucleoside binding;GO:0044389//ubiquitin-like protein ligase binding	GO:0006464//cellular protein modification process;GO:0006796//phosphate-containing compound metabolic process;GO:0048544//recognition of pollen
MSTRG.24240	HAM1	0.23	0.24	0.29	6.03	3.36	4.45	0	0	0	0	4.6133	0.2533	-4.186700714	9.49E-17	1.19E-14	-7.984893108	0.00551397	0.08676021	histone acetyltransferase of the MYST family 1 [Eutrema salsugineum]	-	GO:0043231//intracellular membrane-bounded organelle	GO:0046872//metal ion binding;GO:0090595//acetyl-CoA:L-lysine N6-acetyltransferase	GO:0000226//microtubule cytoskeleton organization;GO:0000904//cell morphogenesis involved in differentiation;GO:0006259//DNA metabolic process;GO:0009411//response to UV;GO:0010074//maintenance of meristem identity;GO:0010468//regulation of gene expression;GO:0042127//regulation of cell proliferation
MSTRG.24241	--	0.18	0.22	0.22	4.65	2.41	3.66	0	0	0	0	3.5733	0.2067	-4.11189288	3.22E-13	2.65E-11	-7.691161905	0.014986071	0.17651999	BnaAnng30230D [Brassica napus]	-	GO:0043231//intracellular membrane-bounded organelle	-	GO:0006950//response to stress;GO:0044699//single-organism process
MSTRG.24250	SUC1	1.82	0.44	1.08	0.16	0.34	0.06	0.92	0.63	0.73	0.76	0.1867	1.1133	2.57634937	0.000756098	0.008966503	-0.550814278	0.981234328	0.999767122	sucrose transport protein SUC1-like [Brassica napus]	-	GO:0005911//cell-cell junction;GO:0031224//intrinsic component of membrane;GO:0043231//intracellular membrane-bounded organelle	GO:0005351//sugar:proton symporter activity;GO:0015154//disaccharide transmembrane transporter activity;GO:0015573//beta-glucoside transmembrane transporter activity;GO:0051183//vitamin transporter activity	GO:0015718//monocarboxylic acid transport;GO:0015766//disaccharide transport;GO:0042886//amide transport;GO:0044763//single-organism cellular process;GO:0048580//regulation of post-embryonic development;GO:0051707//response to other organism;GO:0090567//reproductive shoot system development;GO:1901656//glycoside transport
MSTRG.2486	DXS	4.88	3.4	4.37	10.59	10.86	5.89	1.32	1.49	1.42	1.41	9.1133	4.2167	-1.111875858	0.114569183	0.420334315	-1.580407816	0.001216022	0.027522391	PREDICTED: 1-deoxy-D-xylulose-5-phosphate synthase, chloroplastic [Brassica oleracea var. oleracea] [Brassica oleracea]	ko01100//Metabolic pathways;ko01110//Biosynthesis of secondary metabolites;ko00900//Terpenoid backbone biosynthesis;ko00730//Thiamine metabolism	GO:0009532//plastid stroma	GO:0016744//transferase activity, transferring aldehyde or ketonic groups;GO:0043169//cation binding	GO:0000097//sulfur amino acid biosynthetic process;GO:0006090//pyruvate metabolic process;GO:0006355//regulation of transcription, DNA-templated;GO:0006468//protein phosphorylation;GO:0006544//glycine metabolic process;GO:0006633//fatty acid biosynthetic process;GO:0006732//coenzyme metabolic process;GO:0006753//nucleoside phosphate metabolic process;GO:0006772//thiamine metabolic process;GO:0006…
MSTRG.24966	At5g62623	0	0	0	0.96	9.72	10.5	0	0	0	0	7.06	0	-12.78545247	1.45E-07	4.92E-06	0	1	1	defensin-like protein 266 [Eutrema salsugineum]	-	-	-	-
MSTRG.25150	SMC4	0.78	1.19	0.73	8.43	5.84	8.34	0.31	0.38	0.12	0.27	7.5367	0.9	-3.06592968	1.03E-16	1.28E-14	-1.736965594	0.07002726	0.467579522	structural maintenance of chromosomes protein 4 [Brassica rapa]	-	GO:0043231//intracellular membrane-bounded organelle;GO:0043232//intracellular non-membrane-bounded organelle	GO:0032550//purine ribonucleoside binding	GO:0000819//sister chromatid segregation;GO:0002252//immune effector process;GO:0003006//developmental process involved in reproduction;GO:0006305//DNA alkylation;GO:0006342//chromatin silencing;GO:0030422//production of siRNA involved in RNA interference;GO:0034968//histone lysine methylation;GO:0048580//regulation of post-embryonic development;GO:0051052//regulation of DNA metabolic process;GO:…
MSTRG.25151	SMC4	1.1	0.71	0.87	9.38	2.47	6.11	0.2	0.32	0.12	0.2133	5.9867	0.8933	-2.744482444	6.56E-05	0.001127449	-2.06608919	0.023932393	0.242207191	structural maintenance of chromosomes protein 4-like [Brassica napus]	-	GO:0043231//intracellular membrane-bounded organelle;GO:0043232//intracellular non-membrane-bounded organelle	GO:0032550//purine ribonucleoside binding	GO:0000819//sister chromatid segregation;GO:0002252//immune effector process;GO:0003006//developmental process involved in reproduction;GO:0006305//DNA alkylation;GO:0006342//chromatin silencing;GO:0030422//production of siRNA involved in RNA interference;GO:0034968//histone lysine methylation;GO:0048580//regulation of post-embryonic development;GO:0051052//regulation of DNA metabolic process;GO:…
MSTRG.25421	BGLU3	0.62	0.95	1.16	0.16	0.11	0	0.61	0.78	2.57	1.32	0.09	0.91	3.337869639	2.63E-06	6.72E-05	0.536599479	0.141768045	0.667248815	PREDICTED: beta-glucosidase 3-like isoform X4 [Brassica oleracea var. oleracea] [Brassica oleracea]	ko01100//Metabolic pathways;ko01110//Biosynthesis of secondary metabolites;ko00940//Phenylpropanoid biosynthesis;ko00500//Starch and sucrose metabolism;ko00460//Cyanoamino acid metabolism	GO:0043231//intracellular membrane-bounded organelle	GO:0016798//hydrolase activity, acting on glycosyl bonds	GO:0009608//response to symbiont;GO:0009812//flavonoid metabolic process
MSTRG.25756	--	1.32	2.35	0.47	10.36	75.68	15.69	0	0	0	0	33.91	1.38	-4.618970612	3.45E-06	8.60E-05	-10.43045255	0.002513922	0.048022211	BnaA06g35860D [Brassica napus]	-	-	-	-
MSTRG.25796	GLC1	17.6	48.08	17.62	156.06	627.91	147.26	1.01	4.42	3.37	2.9333	310.41	27.7667	-3.482749135	1.78E-05	0.000361509	-3.242741067	0.000268713	0.008186436	PREDICTED: major pollen allergen Ole e 10-like [Brassica oleracea var. oleracea] [Brassica oleracea]	-	GO:0005911//cell-cell junction;GO:0030312//external encapsulating structure	GO:0016798//hydrolase activity, acting on glycosyl bonds	GO:0010243//response to organonitrogen compound
MSTRG.26297	--	0.27	0	0	2.33	35.27	10.7	0	0	0	0	16.1	0.09	-7.482919972	5.01E-06	0.000118742	-6.491853096	0.812238488	0.999767122	pollen coat protein B3 [Brassica rapa]	-	-	-	-
MSTRG.26335	CLSY4	1.52	2.12	2.1	4.33	4.08	4.74	0.78	0.53	1.28	0.8633	4.3833	1.9133	-1.195940158	0.002079892	0.020840858	-1.148098639	0.182530001	0.745289751	SNF2 domain-containing protein CLASSY 4 isoform X1 [Brassica rapa]	ko03440//Homologous recombination	GO:0043231//intracellular membrane-bounded organelle	GO:0003676//nucleic acid binding;GO:0017111//nucleoside-triphosphatase activity;GO:0032550//purine ribonucleoside binding	GO:0007154//cell communication;GO:0016571//histone methylation;GO:0030422//production of siRNA involved in RNA interference;GO:0045087//innate immune response;GO:0048580//regulation of post-embryonic development
MSTRG.26419	ufaA1	3.44	2.91	2.22	1.49	0.65	0.68	7.08	3.54	7.07	5.8967	0.94	2.8567	1.603600042	3.87E-08	1.47E-06	1.045566939	1.86E-05	0.00088507	BnaCnng54600D [Brassica napus]	-	-	GO:0008757//S-adenosylmethionine-dependent methyltransferase activity	GO:0006629//lipid metabolic process
MSTRG.26489	--	1.7	2.52	1.71	0.11	0	0.06	2.28	2.94	1.92	2.38	0.0567	1.9767	5.124425453	1.37E-07	4.66E-06	0.267891969	0.064700739	0.447118122	HR-like lesion-inducing protein [Arabidopsis thaliana]	-	-	-	-
MSTRG.26707	--	2.26	1.38	2.85	0.77	0.83	1.56	1.42	1.51	0.7	1.21	1.0533	2.1633	1.03829392	0.002527561	0.024491984	-0.83824893	0.689030974	0.999767122	BnaA07g37170D [Brassica napus]	-	-	-	GO:0009628//response to abiotic stimulus;GO:0009814//defense response, incompatible interaction
MSTRG.26789	--	0.2	0.41	0.15	0.03	0	0.02	0.11	0.11	0.17	0.13	0.0167	0.2533	3.925999419	0.000195723	0.002871674	-0.962525295	0.63816593	0.999767122	BnaC05g19740D [Brassica napus]	-	-	-	-
MSTRG.26806	SNL3	0	0	0	0	4.93	2.38	0	0	0	0	2.4367	0	-11.25069319	0.002823424	0.026826627	0	1	1	paired amphipathic helix protein Sin3-like 3 [Brassica rapa]	-	GO:0043231//intracellular membrane-bounded organelle	-	GO:0001101//response to acid chemical;GO:0006355//regulation of transcription, DNA-templated
MSTRG.26835	LKR/SDH	2.22	3.89	2.39	12.44	12	7.3	0.22	0.28	0.83	0.4433	10.58	2.8333	-1.900767382	0.000143335	0.002206253	-2.676036596	0.002594426	0.049133596	BnaA07g09660D [Brassica napus]	-	GO:0044444//cytoplasmic part	GO:0004753//saccharopine dehydrogenase activity	GO:0003006//developmental process involved in reproduction;GO:0006554//lysine catabolic process;GO:0009628//response to abiotic stimulus;GO:0009746//response to hexose;GO:0018205//peptidyl-lysine modification;GO:0034285//response to disaccharide;GO:0042743//hydrogen peroxide metabolic process
MSTRG.26905	At2g39490	0.05	0.03	0	0	0	0	0.81	1.42	0.89	1.04	0	0.0267	4.736965594	0.360345433	0.787798493	5.285402219	4.22E-08	4.71E-06	BnaA07g10640D [Brassica napus]	-	-	-	-
MSTRG.26906	At2g39490	0	0	0.05	0	0.04	0	0.83	2.23	0.2	1.0867	0.0133	0.0167	0.321928095	0.874161882	0.987600447	6.026800059	0.000104758	0.003778074	BnaA07g10640D [Brassica napus]	-	-	-	-
MSTRG.26927	--	3.56	2.74	2.95	1.58	1.53	1.13	0.43	0.47	0.58	0.4933	1.4133	3.0833	1.125389101	8.19E-10	4.24E-08	-2.64385619	1.74E-06	0.000118046	vacuolar protein sorting-associated protein 35A-like [Brassica napus]	-	-	-	-
MSTRG.26940	--	6.45	6.48	6.78	2.73	3.69	2.19	5.38	7.55	7.25	6.7267	2.87	6.57	1.194842634	1.29E-13	1.12E-11	0.033998398	0.028310678	0.269108407	unnamed protein product, partial [Brassica rapa]	-	-	-	-
MSTRG.27235	PHB1	2.56	0.61	1.19	0	0	0	1.83	0.46	0.35	0.88	0	1.4533	10.50514992	1.56E-09	7.73E-08	-0.723790205	0.840870619	0.999767122	PREDICTED: prohibitin-1, mitochondrial-like [Raphanus sativus]	-	GO:0009536//plastid;GO:0030312//external encapsulating structure;GO:0031224//intrinsic component of membrane;GO:0044455//mitochondrial membrane part	-	GO:0003006//developmental process involved in reproduction;GO:0006997//nucleus organization;GO:0009117//nucleotide metabolic process;GO:0019941//modification-dependent protein catabolic process;GO:0035966//response to topologically incorrect protein;GO:0043094//cellular metabolic compound salvage;GO:0043248//proteasome assembly
MSTRG.27263	SSK2	15.24	1.35	2.81	1.23	0.63	0.22	12.87	1.11	4.65	6.21	0.6933	6.4667	3.221401219	9.03E-05	0.001484505	-0.058428978	0.684168592	0.999767122	protein kinase byr2, partial [Brassica rapa]	-	-	-	-
MSTRG.27511	H2AV	0.12	0.06	0.25	1.56	1.44	3.18	0.06	0	0.16	0.0733	2.06	0.1433	-3.845198273	9.01E-05	0.001482266	-0.966833136	0.831289538	0.999767122	histone H2A variant 1 isoform X1 [Brassica napus]	-	GO:0043231//intracellular membrane-bounded organelle;GO:0043232//intracellular non-membrane-bounded organelle	GO:0003676//nucleic acid binding;GO:0046983//protein dimerization activity	-
MSTRG.27519	GATA8	3.12	2.15	1.44	8.47	8.27	6.78	0.49	0.1	0.3	0.2967	7.84	2.2367	-1.809503389	0.000395376	0.005200735	-2.914435525	0.000672044	0.017296857	GATA transcription factor 8 [Brassica rapa]	-	GO:0043231//intracellular membrane-bounded organelle	GO:0003677//DNA binding;GO:0046914//transition metal ion binding	GO:0006355//regulation of transcription, DNA-templated;GO:0044707//single-multicellular organism process;GO:0048511//rhythmic process
MSTRG.27600	LCR52	2.57	4.41	6.45	1.4	0.58	0.81	1.05	4.57	2.25	2.6233	0.93	4.4767	2.267122278	4.26E-07	1.31E-05	-0.771023764	0.858313416	0.999767122	BnaCnng13530D [Brassica napus]	-	-	-	-
MSTRG.27601	LCR30	0	0	0	0.31	6.47	2.64	0	0	0.08	0.0267	3.14	0	-11.61654884	0.000180461	0.0026806	4.736965594	0.653539287	0.999767122	BnaCnng13610D [Brassica napus]	-	-	-	-
MSTRG.2788	--	3.85	9.88	2.07	50.69	243.17	36.91	0	0.43	0.33	0.2533	110.2567	5.2667	-4.387831928	2.47E-06	6.36E-05	-4.37778133	0.000737348	0.018635996	BnaA06g16030D [Brassica napus]	-	-	-	-
MSTRG.28086	PATL1	0.23	0.69	0.94	2.21	2.87	3.74	0.05	0.06	0.09	0.0667	2.94	0.62	-2.245476034	0.002369385	0.023237474	-3.217230716	0.004758156	0.078151612	patellin-1-like [Brassica napus]	-	GO:0005576//extracellular region;GO:0005911//cell-cell junction;GO:0009536//plastid;GO:0031224//intrinsic component of membrane	GO:0019899//enzyme binding	GO:0000904//cell morphogenesis involved in differentiation;GO:0006090//pyruvate metabolic process;GO:0006970//response to osmotic stress;GO:0006996//organelle organization;GO:0010038//response to metal ion;GO:0042044//fluid transport;GO:0048588//developmental cell growth
MSTRG.28113	At1g71691	6.75	21.74	12.94	14.19	20.67	13.73	1.02	2.54	3.03	2.1967	16.1967	13.81	-0.229983612	0.36271389	0.79030561	-2.65232545	0.001327358	0.029520131	GDSL esterase/lipase At1g71691 [Brassica rapa]	-	-	GO:0016788//hydrolase activity, acting on ester bonds	GO:0006629//lipid metabolic process
MSTRG.28223	PAT22	0.44	1.03	0.92	3.92	3.94	4.85	0.19	0.3	0.38	0.29	4.2367	0.7967	-2.410881507	1.24E-07	4.28E-06	-1.457923312	0.179148105	0.7404012	probable protein S-acyltransferase 22 [Brassica napus]	-	GO:0016020//membrane	GO:0016740//transferase activity	GO:0009987//cellular process;GO:0071840//cellular component organization or biogenesis
MSTRG.28235	At1g68905	0.44	0.29	0.1	2.17	57.93	14.13	0	0	0	0	24.7433	0.2767	-6.482747222	2.67E-07	8.62E-06	-8.112005026	0.233335382	0.819793667	BnaCnng48430D [Brassica napus]	-	-	-	-
MSTRG.28436	--	3.51	3.73	3.01	2.11	1.56	1.44	1.8	2.34	2.54	2.2267	1.7033	3.4167	1.004228713	8.39E-12	5.77E-10	-0.617703902	0.947514177	0.999767122	Reverse transcriptase domain [Arabidopsis suecica]	-	-	-	-
MSTRG.2844	--	0	0	0	1.71	0.49	0.95	0	0	0	0	1.05	0	-10.03617361	0.004448252	0.038578099	0	1	1	hypothetical protein IGI04_030241 [Brassica rapa subsp. trilocularis] [Brassica rapa]	-	-	-	-
MSTRG.2850	--	0.88	1.47	0.65	0	0	0	2.62	0.27	1.11	1.3333	0	1	9.965784285	1.33E-06	3.68E-05	0.415037499	0.300912937	0.897522554	LOW QUALITY PROTEIN: hypothetical protein HID58_013523 [Brassica napus]	-	-	-	-
MSTRG.28536	--	12.12	18.86	14.95	2.4	7.42	3.32	12.83	46.2	23.88	27.6367	4.38	15.31	1.805471508	3.06E-08	1.18E-06	0.852109336	0.009153923	0.12528413	Reverse transcriptase domain [Arabidopsis suecica]	-	-	-	-
MSTRG.28552	XYL1	0.62	0.03	1.24	32.17	10.78	80.07	0.16	0.49	0.08	0.2433	41.0067	0.63	-6.024362836	6.32E-05	0.001093398	-1.372417865	0.559681773	0.999767122	alpha-xylosidase 1 [Brassica rapa]	-	GO:0005576//extracellular region;GO:0005618//cell wall;GO:0005911//cell-cell junction;GO:0009536//plastid	GO:0005488//binding;GO:0090599//alpha-glucosidase activity;GO:0097599//xylanase activity	GO:0000272//polysaccharide catabolic process;GO:0006073//cellular glucan metabolic process;GO:0010038//response to metal ion;GO:0042546//cell wall biogenesis;GO:0071555//cell wall organization
MSTRG.29116	AFP2	0.05	0	0.06	0	0.02	0	3.85	19.96	4.68	9.4967	0.0067	0.0367	2.459431619	0.168830467	0.530682888	8.016808288	7.80E-16	5.43E-13	PREDICTED: defensin-like protein 1 [Brassica oleracea var. oleracea] [Brassica oleracea]	ko04016//MAPK signaling pathway - plant	GO:0030312//external encapsulating structure	-	GO:0000160//phosphorelay signal transduction system;GO:0001906//cell killing;GO:0009611//response to wounding;GO:0009620//response to fungus;GO:0009685//gibberellin metabolic process;GO:0010476//gibberellin mediated signaling pathway;GO:0042742//defense response to bacterium
MSTRG.2914	--	6.23	12.03	15.85	1.51	2.61	2.26	15.09	31.26	20.2	22.1833	2.1267	11.37	2.418566426	4.15E-12	3.00E-10	0.964243911	0.002336676	0.045414044	BnaA03g56700D [Brassica napus]	-	-	-	-
MSTRG.29157	--	0.06	0.2	0	0.59	8.59	2.71	0	0	0	0	3.9633	0.0867	-5.515093282	0.000208922	0.003040653	-6.437405312	0.618223612	0.999767122	PREDICTED: protein indeterminate-domain 6, chloroplastic-like [Brassica oleracea var. oleracea] [Brassica oleracea]	-	-	-	-
MSTRG.29356	RHM1	4.43	3.05	3.01	12.18	11.82	12.54	2.3	1.11	1.31	1.5733	12.18	3.4967	-1.800461956	4.44E-08	1.67E-06	-1.152155913	0.161306626	0.709240527	trifunctional UDP-glucose 4,6-dehydratase/UDP-4-keto-6-deoxy-D-glucose 3,5-epimerase/UDP-4-keto-L-rhamnose-reductase RHM1 [Brassica rapa]	ko00520//Amino sugar and nucleotide sugar metabolism	GO:0005911//cell-cell junction;GO:0009536//plastid	GO:0016616//oxidoreductase activity, acting on the CH-OH group of donors, NAD or NADP as acceptor;GO:0016836//hydro-lyase activity;GO:0048037//cofactor binding	GO:0009226//nucleotide-sugar biosynthetic process;GO:0009411//response to UV;GO:0010928//regulation of auxin mediated signaling pathway;GO:0033692//cellular polysaccharide biosynthetic process;GO:0034285//response to disaccharide;GO:0045229//external encapsulating structure organization;GO:0051553//flavone biosynthetic process
MSTRG.29399	--	0	0	0.07	1.01	1.18	0.45	0	0	0	0	0.88	0.0233	-5.237039197	0.002219364	0.021968992	-4.544320516	0.982006263	0.999767122	unnamed protein product [Brassica napus]	-	-	-	-
MSTRG.29556	--	2.07	0.63	1.06	11.78	78.6	31.58	0	0	0.41	0.1367	40.6533	1.2533	-5.019531583	8.12E-09	3.54E-07	-3.197036847	0.094607551	0.549490852	PREDICTED: defensin-like protein 275 [Camelina sativa]	-	-	-	-
MSTRG.29604	GGAT1	0.77	0.45	0.89	2.03	2.19	2.87	0.14	0.1	0.1	0.1133	2.3633	0.7033	-1.748542629	0.003256439	0.030112667	-2.633636347	0.006247091	0.095160047	PREDICTED: RNA-binding protein 24-like [Brassica oleracea var. oleracea] [Brassica oleracea]	-	GO:0005576//extracellular region;GO:0009536//plastid	GO:0003676//nucleic acid binding;GO:0008483//transaminase activity;GO:0016755//transferase activity, transferring amino-acyl groups	GO:0006520//cellular amino acid metabolic process;GO:0006790//sulfur compound metabolic process;GO:0006950//response to stress;GO:0044249//cellular biosynthetic process;GO:0044283//small molecule biosynthetic process;GO:0044712//single-organism catabolic process;GO:1901575//organic substance catabolic process;GO:1901576//organic substance biosynthetic process
MSTRG.29668	--	3.99	4.29	5.57	1.96	1.1	2.03	1.24	0.29	1.13	0.8867	1.6967	4.6167	1.444148415	1.44E-10	8.30E-09	-2.380387825	0.001175683	0.026810584	hypothetical protein IGI04_013159 [Brassica rapa subsp. trilocularis] [Brassica rapa]	-	-	-	-
MSTRG.29682	PLDALPHA2	0	0	0	2.13	0.36	0.17	0	0	0.04	0.0133	0.8867	0	-9.79224803	0.000249361	0.003529468	3.736965594	0.653539287	0.999767122	PREDICTED: phospholipase D alpha 2-like [Brassica oleracea var. oleracea] [Brassica oleracea]	ko01100//Metabolic pathways;ko01110//Biosynthesis of secondary metabolites;ko04144//Endocytosis;ko00564//Glycerophospholipid metabolism;ko00565//Ether lipid metabolism	GO:0005911//cell-cell junction;GO:0009536//plastid;GO:0016020//membrane;GO:0030135//coated vesicle	GO:0004620//phospholipase activity;GO:0046872//metal ion binding;GO:1902936//phosphatidylinositol bisphosphate binding	GO:0000160//phosphorelay signal transduction system;GO:0006006//glucose metabolic process;GO:0006090//pyruvate metabolic process;GO:0006650//glycerophospholipid metabolic process;GO:0006970//response to osmotic stress;GO:0006996//organelle organization;GO:0009787//regulation of abscisic acid-activated signaling pathway;GO:0010038//response to metal ion;GO:0042044//fluid transport;GO:0044707//sing…
MSTRG.29686	ABA2	0.37	0.32	0.4	2.18	1.12	1.12	0.48	0.69	0.3	0.49	1.4733	0.3633	-2.019718235	0.005809242	0.047781188	0.43148802	0.098176919	0.560349723	xanthoxin dehydrogenase isoform X1 [Brassica rapa]	ko01100//Metabolic pathways;ko01110//Biosynthesis of secondary metabolites;ko00906//Carotenoid biosynthesis	GO:0044444//cytoplasmic part	GO:0004022//alcohol dehydrogenase (NAD) activity	GO:0006560//proline metabolic process;GO:0006950//response to stress;GO:0009687//abscisic acid metabolic process;GO:0009746//response to hexose;GO:0009756//carbohydrate mediated signaling;GO:0010565//regulation of cellular ketone metabolic process
MSTRG.29806	--	0.85	0.91	0.79	0.58	0.19	0.4	0	0	0.8	0.2667	0.39	0.85	1.123988717	0.00151757	0.016122589	-1.672425342	0.530152228	0.999767122	mitochondrial thiamine pyrophosphate carrier 1-like [Brassica napus]	-	-	-	-
MSTRG.29854	CEP9	6.89	5.13	0.94	48.68	689.43	233.51	0	0.08	0.16	0.08	323.8733	4.32	-6.228254564	1.40E-06	3.82E-05	-5.754887502	4.65E-05	0.001925245	DNA-directed RNA polymerase 3, chloroplastic-like [Brassica napus]	-	-	-	-
MSTRG.29876	--	0	0	0	0	11.46	2.13	0	0	0	0	4.53	0	-12.14529533	0.003171331	0.029486087	0	1	1	BnaA08g03530D [Brassica napus]	-	-	-	-
MSTRG.29907	--	0.15	0	0	1.78	16.01	3.84	0	0	0	0	7.21	0.05	-7.171927354	5.75E-05	0.001003784	-5.64385619	0.982006263	0.999767122	defensin-like protein 78 [Arabidopsis lyrata subsp. lyrata] [Arabidopsis lyrata]	-	-	-	-
MSTRG.29939	--	0.45	0.76	0.56	4.82	29.16	5.84	0	0.17	0	0.0567	13.2733	0.59	-4.491671956	1.53E-06	4.13E-05	-3.380142709	0.083691361	0.514674692	BnaA08g03760D [Brassica napus]	-	GO:0016020//membrane	-	-
MSTRG.29969	--	0.76	0.75	1.13	5.57	6.47	3.16	0.18	0.33	0.34	0.2833	5.0667	0.88	-2.525461489	0.000193469	0.002842043	-1.635003183	0.238505716	0.826488277	uncharacterized protein LOC103847940 [Brassica rapa]	-	GO:0009536//plastid	-	-
MSTRG.29984	RD21A	0.81	0.97	0.82	0.65	1.53	0.68	1.82	1.25	2.67	1.9133	0.9533	0.8667	-0.137503524	0.304294118	0.730624787	1.142539114	3.92E-05	0.001655793	cysteine proteinase RD21A [Brassica rapa]	-	GO:0043231//intracellular membrane-bounded organelle	GO:0004175//endopeptidase activity;GO:0004620//phospholipase activity;GO:0016628//oxidoreductase activity, acting on the CH-CH group of donors, NAD or NADP as acceptor	GO:0019538//protein metabolic process;GO:0044710//single-organism metabolic process
MSTRG.30001	RHG1A	3.1	3.38	3.42	6.58	9.65	7.75	2.34	2.03	2.19	2.1867	7.9933	3.3	-1.276331228	0.000575924	0.007193215	-0.59373271	0.978725352	0.999767122	probable E3 ubiquitin-protein ligase RHG1A [Brassica rapa]	-	-	-	-
MSTRG.30035	--	0.16	0.06	0.12	1.17	1.04	1.17	0	0	0	0	1.1267	0.1133	-3.313416595	0.000591572	0.00736053	-6.824428435	0.37211476	0.956781623	hypothetical protein F2Q68_00032914 [Brassica cretica]	-	-	-	-
MSTRG.30059	SKS1	0.59	0.97	0.63	0.36	0.21	0.1	0.71	0.36	0.66	0.5767	0.2233	0.73	1.708697869	0.001251185	0.013719606	-0.340158832	0.709759668	0.999767122	monocopper oxidase-like protein SKS1 [Brassica rapa]	-	GO:0005576//extracellular region;GO:0005618//cell wall;GO:0005911//cell-cell junction;GO:0031090//organelle membrane;GO:0031225//anchored component of membrane;GO:0044444//cytoplasmic part	-	GO:0005976//polysaccharide metabolic process;GO:0009826//unidimensional cell growth;GO:0010053//root epidermal cell differentiation;GO:0044711//single-organism biosynthetic process;GO:0048468//cell development
MSTRG.30126	--	11.59	10.19	12.86	4.82	2.12	3.83	6.9	7.98	10.45	8.4433	3.59	11.5467	1.68542068	9.31E-13	7.22E-11	-0.451591853	0.616330042	0.999767122	-	-	-	-	-
MSTRG.30262	OEP162	0.28	0.23	0.11	0	0	0.03	0.39	1.98	0.39	0.92	0.01	0.2067	4.36923381	0.002814341	0.026761278	2.154328146	0.005856731	0.090699084	PREDICTED: outer envelope pore protein 16-2, chloroplastic isoform X1 [Raphanus sativus]	-	GO:0031355//integral component of plastid outer membrane	GO:0008320//protein transmembrane transporter activity;GO:0022829//wide pore channel activity;GO:0046943//carboxylic acid transmembrane transporter activity	GO:0015031//protein transport
MSTRG.30264	OEP162	0.28	0.58	1.4	0.11	0	0	0.71	0	0	0.2367	0.0367	0.7533	4.360747344	0.000316001	0.004306987	-1.670431843	0.539018554	0.999767122	BnaC08g10840D [Brassica napus]	-	GO:0031355//integral component of plastid outer membrane	GO:0008320//protein transmembrane transporter activity;GO:0022829//wide pore channel activity;GO:0046943//carboxylic acid transmembrane transporter activity	GO:0015031//protein transport
MSTRG.30590	--	0.1	0.19	0.67	1.4	2.1	6.43	0.04	0.06	0.05	0.05	3.31	0.32	-3.370687407	0.000918555	0.010541486	-2.678071905	0.057649284	0.417521508	Harbinger transposase-derived protein [Arabidopsis thaliana x Arabidopsis arenosa]	-	-	-	-
MSTRG.30739	--	19.45	7.37	1.1	2.51	0.39	0.4	27.37	1.07	3.84	10.76	1.1	9.3067	3.080761012	0.000257732	0.003629222	0.209341637	0.561447129	0.999767122	hypothetical protein IGI04_042624, partial [Brassica rapa subsp. trilocularis] [Brassica rapa]	-	-	-	-
MSTRG.30774	--	0.08	0	0	0.88	9.02	0.84	0	0	0	0	3.58	0.0267	-7.068778278	0.00030781	0.004212232	-4.736965594	0.982006263	0.999767122	PREDICTED: thionin-like protein 1 [Raphanus sativus]	-	-	-	-
MSTRG.30828	BGLU3	16.93	14.23	5.72	0.78	0.78	0.06	15.15	17.41	8.9	13.82	0.54	12.2933	4.508772938	1.98E-11	1.28E-09	0.168881461	0.131784551	0.645919767	beta-glucosidase 3 isoform X1 [Brassica rapa]	ko01100//Metabolic pathways;ko01110//Biosynthesis of secondary metabolites;ko00940//Phenylpropanoid biosynthesis;ko00500//Starch and sucrose metabolism;ko00460//Cyanoamino acid metabolism	GO:0043231//intracellular membrane-bounded organelle	GO:0016798//hydrolase activity, acting on glycosyl bonds	GO:0009608//response to symbiont;GO:0009812//flavonoid metabolic process
MSTRG.30848	At5g42232	3.36	3.98	1.75	12.75	35.97	8.9	0.26	0.93	0.08	0.4233	19.2067	3.03	-2.664217461	0.000763551	0.009043533	-2.839451797	0.019396994	0.209882381	BnaCnng23100D [Brassica napus]	-	-	-	-
MSTRG.30967	At4g31860	13.27	13.93	13.04	2.6	4.49	1.5	5.86	8.18	3.92	5.9867	2.8633	13.4133	2.227900269	7.26E-14	6.50E-12	-1.163842955	0.145649106	0.676629367	BnaC03g67240D [Brassica napus]	-	GO:0016020//membrane	GO:0016787//hydrolase activity	GO:0031668//cellular response to extracellular stimulus;GO:0033554//cellular response to stress;GO:0044237//cellular metabolic process;GO:0044238//primary metabolic process;GO:0071704//organic substance metabolic process
MSTRG.30977	REM17	4.42	3.44	3.26	1.8	1.59	1.47	1.2	0.5	1.7	1.1333	1.62	3.7067	1.194128569	3.45E-14	3.22E-12	-1.709550137	0.023610212	0.240154132	BnaA08g12400D [Brassica napus]	-	-	-	-
MSTRG.30990	--	1.02	1.69	0.57	2.12	2.39	0.93	0.14	0.03	0.05	0.0733	1.8133	1.0933	-0.729910837	0.838536917	0.987600447	-3.898120386	2.41E-05	0.00109979	BnaA07g03900D [Brassica napus]	-	-	-	-
MSTRG.31029	LCR25	0	0	0	0.63	2.81	2.2	0	0	0	0	1.88	0	-10.87651695	0.000313179	0.004278129	0	1	1	defensin-like protein 159 [Brassica napus]	-	-	-	-
MSTRG.31098	LCR19	0.21	0.51	0.23	4.99	2.87	1.05	0	0.14	0	0.0467	2.97	0.3167	-3.229426013	0.001037017	0.011714304	-2.762500686	0.23652774	0.823594303	defensin-like protein 183 [Capsella rubella]	-	-	-	-
MSTRG.31141	NAPB	464.25	368.99	114.58	48.09	41.37	5.68	250.43	203.26	50.58	168.09	31.7133	315.94	3.316489173	3.19E-07	1.01E-05	-0.910416705	0.668391287	0.999767122	napin-B-like [Brassica rapa]	-	-	GO:0019901//protein kinase binding	GO:0009409//response to cold;GO:0044763//single-organism cellular process;GO:0048229//gametophyte development;GO:0051235//maintenance of location
MSTRG.31164	PXG1	12.75	7.32	15.77	0	0	0	17.56	16.65	24.51	19.5733	0	11.9467	13.54432052	6.17E-18	9.02E-16	0.712281331	0.001473339	0.031952036	PREDICTED: peroxygenase 1 [Brassica oleracea var. oleracea] [Brassica oleracea]	ko00073//Cutin, suberine and wax biosynthesis	GO:0009532//plastid stroma;GO:0031224//intrinsic component of membrane;GO:0043232//intracellular non-membrane-bounded organelle	GO:0004497//monooxygenase activity;GO:0008374//O-acyltransferase activity;GO:0016684//oxidoreductase activity, acting on peroxide as acceptor;GO:0016705//oxidoreductase activity, acting on paired donors, with incorporation or reduction of molecular oxygen;GO:0046872//metal ion binding	GO:0001101//response to acid chemical;GO:0006090//pyruvate metabolic process;GO:0006633//fatty acid biosynthetic process;GO:0006779//porphyrin-containing compound biosynthetic process;GO:0006996//organelle organization;GO:0009409//response to cold;GO:0009639//response to red or far red light;GO:0009756//carbohydrate mediated signaling;GO:0009793//embryo development ending in seed dormancy;GO:0016…
MSTRG.31165	PXG1	5.92	3.26	11.94	0	0	0	7.69	6.11	11.1	8.3	0	7.04	12.78135971	1.05E-12	8.07E-11	0.237535908	0.163521076	0.713010029	PREDICTED: peroxygenase 1-like [Raphanus sativus]	ko00073//Cutin, suberine and wax biosynthesis	GO:0009532//plastid stroma;GO:0031224//intrinsic component of membrane;GO:0043232//intracellular non-membrane-bounded organelle	GO:0004497//monooxygenase activity;GO:0008374//O-acyltransferase activity;GO:0016684//oxidoreductase activity, acting on peroxide as acceptor;GO:0016705//oxidoreductase activity, acting on paired donors, with incorporation or reduction of molecular oxygen;GO:0046872//metal ion binding	GO:0001101//response to acid chemical;GO:0006090//pyruvate metabolic process;GO:0006633//fatty acid biosynthetic process;GO:0006779//porphyrin-containing compound biosynthetic process;GO:0006996//organelle organization;GO:0009409//response to cold;GO:0009639//response to red or far red light;GO:0009756//carbohydrate mediated signaling;GO:0009793//embryo development ending in seed dormancy;GO:0016…
MSTRG.31232	HSP70-6	5.3	6.99	4.51	16.99	16.02	13.47	3.09	3.18	2.2	2.8233	15.4933	5.6	-1.468148836	4.34E-05	0.000782629	-0.988027358	0.239325444	0.827594472	heat shock 70 kDa protein 6, chloroplastic [Brassica rapa]	ko04141//Protein processing in endoplasmic reticulum;ko03040//Spliceosome;ko04144//Endocytosis	GO:0009526//plastid envelope;GO:0009532//plastid stroma	GO:0005515//protein binding;GO:0016628//oxidoreductase activity, acting on the CH-CH group of donors, NAD or NADP as acceptor;GO:0032550//purine ribonucleoside binding	GO:0003006//developmental process involved in reproduction;GO:0006605//protein targeting;GO:0006950//response to stress;GO:0009657//plastid organization;GO:0010038//response to metal ion;GO:0044267//cellular protein metabolic process;GO:0044403//symbiosis, encompassing mutualism through parasitism;GO:0044710//single-organism metabolic process
MSTRG.31272	LCR25	12.31	9.66	10.29	27.84	192.98	33.4	1.34	5.58	3.11	3.3433	84.74	10.7533	-2.978259191	0.000977586	0.011137712	-1.685424833	0.090859996	0.537863642	defensin-like protein 159 [Brassica rapa]	-	-	-	-
MSTRG.31305	--	22.78	51.92	34.75	102.79	473.36	143.1	6.73	33.79	23.68	21.4	239.75	36.4833	-2.716221361	0.000439318	0.005690245	-0.769626752	0.853159049	0.999767122	unnamed protein product [Brassica rapa]	-	-	-	-
MSTRG.31362	BLH2	6.1	7.76	9.71	18.16	16.69	24.31	3.3	2.36	3.12	2.9267	19.72	7.8567	-1.327670294	0.004476408	0.038797513	-1.424658914	0.004310547	0.07266096	LOW QUALITY PROTEIN: BEL1-like homeodomain protein 2 [Brassica napus]	-	GO:0043231//intracellular membrane-bounded organelle	GO:0001071//nucleic acid binding transcription factor activity;GO:0003676//nucleic acid binding	GO:0009887//organ morphogenesis;GO:0010467//gene expression;GO:0034645//cellular macromolecule biosynthetic process
MSTRG.31405	At4g38062	0.1	0.05	0.05	1.23	0.73	1.08	0	0	0.07	0.0233	1.0133	0.0667	-3.925999419	2.64E-06	6.75E-05	-1.514573173	0.602283223	0.999767122	basic helix loop helix (bHLH) DNA-binding superfamily protein [Arabidopsis thaliana]	-	-	-	GO:0010467//gene expression;GO:0034645//cellular macromolecule biosynthetic process
MSTRG.31418	LCR45	0.62	0.42	0.08	3.68	39.1	8.97	0	0	0	0	17.25	0.3733	-5.529988225	1.26E-06	3.49E-05	-8.544320516	0.121552807	0.623342082	defensin-like protein 75 [Brassica rapa]	-	-	-	-
MSTRG.31822	--	0.08	0	0	1.59	22.59	2.64	0	0	0	0	8.94	0.0267	-8.389093522	4.75E-06	0.000113239	-4.736965594	0.982006263	0.999767122	unnamed protein product [Brassica napus]	-	-	-	-
MSTRG.31856	TWN2	0.14	0.27	0.28	1.27	2.05	1.23	0.29	0.09	0.14	0.1733	1.5167	0.23	-2.721198278	1.23E-06	3.43E-05	-0.408084739	0.839805833	0.999767122	valine--tRNA ligase, mitochondrial 1-like [Brassica napus]	ko00970//Aminoacyl-tRNA biosynthesis	GO:0009536//plastid	GO:0004812//aminoacyl-tRNA ligase activity;GO:0032550//purine ribonucleoside binding;GO:0052689//carboxylic ester hydrolase activity	GO:0003006//developmental process involved in reproduction;GO:0006418//tRNA aminoacylation for protein translation;GO:0006448//regulation of translational elongation
MSTRG.31879	--	0.86	1.06	1.03	0.74	0.31	0.21	0.32	0.3	0.35	0.3233	0.42	0.9833	1.227291221	0.001012598	0.011493472	-1.604658302	0.058195927	0.41987482	unnamed protein product [Brassica napus]	-	-	-	-
MSTRG.32039	LCR61	0	0	0	0.23	7.07	3.58	0	0	0	0	3.6267	0	-11.82442844	0.000105109	0.001700739	0	1	1	defensin-like protein 172 [Brassica rapa]	-	-	-	-
MSTRG.32180	Dcun1d4	1.21	1.52	1.87	0.07	0.51	0.64	1.11	1.62	1.67	1.4667	0.4067	1.5333	1.914752713	0.00027077	0.003784595	-0.064130337	0.27345563	0.869463046	PREDICTED: DCN1-like protein 4 [Brassica oleracea var. oleracea] [Brassica oleracea]	-	-	-	-
MSTRG.32427	DRP2A	6.94	7.05	6.82	15.01	13.83	13.71	5.24	3.56	5.34	4.7133	14.1833	6.9367	-1.031882167	1.57E-05	0.00032374	-0.557494845	0.908671995	0.999767122	dynamin-2A [Brassica rapa]	ko04144//Endocytosis	GO:0005911//cell-cell junction;GO:0015630//microtubule cytoskeleton;GO:0030139//endocytic vesicle;GO:0031090//organelle membrane	GO:0005515//protein binding;GO:0017111//nucleoside-triphosphatase activity;GO:0032550//purine ribonucleoside binding	GO:0001101//response to acid chemical;GO:0006892//post-Golgi vesicle-mediated transport;GO:0006898//receptor-mediated endocytosis
MSTRG.3251	--	21.22	14.83	13.43	73.31	42.58	35.52	7.9	3.37	4.66	5.31	50.47	16.4933	-1.613543087	0.004609543	0.039727027	-1.635099233	0.009106863	0.124891927	Harbinger transposase-derived protein [Arabidopsis suecica]	-	-	-	-
MSTRG.3256	BGLU19	9.24	4.27	10.49	0	0	0	182.54	115.68	121.62	139.9467	0	8	12.96578428	1.07E-19	1.89E-17	4.128733314	7.36E-27	3.53E-23	beta-glucosidase 19 isoform X1 [Brassica napus]	ko01100//Metabolic pathways;ko01110//Biosynthesis of secondary metabolites;ko00940//Phenylpropanoid biosynthesis;ko00500//Starch and sucrose metabolism;ko00460//Cyanoamino acid metabolism	GO:0005911//cell-cell junction;GO:0009526//plastid envelope;GO:0042579//microbody;GO:0044432//endoplasmic reticulum part	GO:0005543//phospholipid binding;GO:0008422//beta-glucosidase activity;GO:0016791//phosphatase activity;GO:0019899//enzyme binding;GO:0046914//transition metal ion binding;GO:0046983//protein dimerization activity	GO:0000003//reproduction;GO:0006091//generation of precursor metabolites and energy;GO:0006470//protein dephosphorylation;GO:0006568//tryptophan metabolic process;GO:0006605//protein targeting;GO:0006714//sesquiterpenoid metabolic process;GO:0006873//cellular ion homeostasis;GO:0006996//organelle organization;GO:0009267//cellular response to starvation;GO:0009409//response to cold;GO:0009608//res…
MSTRG.32913	PIP1.4	33.51	40.01	44.22	75.33	38.23	70.08	10.62	8.43	14.58	11.21	61.2133	39.2467	-0.641275804	0.945111646	0.99068587	-1.807783849	2.47E-05	0.001122295	aquaporin PIP1-3 isoform X2 [Brassica napus]	-	-	-	-
MSTRG.33262	--	0	0	0	0.55	4.58	0.76	0	0	0	0	1.9633	0	-10.93908942	0.000373278	0.004949535	0	1	1	BnaC03g24080D [Brassica napus]	-	-	-	-
MSTRG.33292	--	14.24	29.82	21.67	116.69	527.43	132.39	1.13	3.7	3.32	2.7167	258.8367	21.91	-3.562380614	1.37E-06	3.77E-05	-3.011680021	6.50E-05	0.002536722	Defensin-like (DEFL) family protein [Arabidopsis thaliana]	-	-	-	-
MSTRG.33299	CHX20	0	0	0	0	0	0	0.21	2.49	0	0.9	0	0	0	1	1	9.813781191	0.002308645	0.04498878	cation/H(+) antiporter 20 isoform X1 [Brassica rapa]	-	GO:0009536//plastid;GO:0031224//intrinsic component of membrane	GO:0005451//monovalent cation:proton antiporter activity	GO:0006605//protein targeting;GO:0006814//sodium ion transport;GO:0006875//cellular metal ion homeostasis;GO:0015992//proton transport;GO:0055067//monovalent inorganic cation homeostasis
MSTRG.33343	--	45.06	65.9	45.5	4.47	0.3	1.66	37.46	113.66	84.5	78.54	2.1433	52.1533	4.604831322	3.46E-13	2.84E-11	0.590668134	0.018531115	0.20389985	BnaCnng15630D [Brassica napus]	-	-	-	-
MSTRG.33530	--	0.53	1.57	0	0.01	0.05	0.01	0.31	0.82	0.03	0.3867	0.0233	0.7	4.906890596	0.000770674	0.009110115	-0.856264523	0.911947747	0.999767122	transposase [Raphanus sativus]	-	-	-	-
MSTRG.33660	AGD8	1.16	3.7	0.91	0.99	1.17	0.56	2.13	3.36	2.08	2.5233	0.9067	1.9233	1.084964667	0.005529542	0.045988059	0.391721981	0.11751852	0.614091578	probable ADP-ribosylation factor GTPase-activating protein AGD8 [Brassica rapa]	ko04144//Endocytosis	GO:0043231//intracellular membrane-bounded organelle;GO:0044444//cytoplasmic part	GO:0046914//transition metal ion binding	GO:0001101//response to acid chemical
MSTRG.33693	--	1.1	0	0.84	18.8	12.87	14.04	0	0	0	0	15.2367	0.6467	-4.558381261	4.81E-09	2.18E-07	-9.336878436	0.274100929	0.870219716	Molecular chaperone Hsp40/DnaJ family protein [Arabidopsis thaliana]	-	-	-	-
MSTRG.33775	BFRUCT3	1.44	2.66	0	0	0	0	2.76	0.39	0.24	1.13	0	1.3667	10.41644569	0.001547078	0.016358374	-0.274338636	0.865706181	0.999767122	PREDICTED: acid beta-fructofuranosidase 3, vacuolar-like [Brassica oleracea var. oleracea] [Brassica oleracea]	ko01100//Metabolic pathways;ko00500//Starch and sucrose metabolism;ko00052//Galactose metabolism	GO:0005618//cell wall;GO:0005773//vacuole	GO:0004564//beta-fructofuranosidase activity;GO:0016289//CoA hydrolase activity	GO:0000041//transition metal ion transport;GO:0005984//disaccharide metabolic process;GO:0006575//cellular modified amino acid metabolic process;GO:0006595//polyamine metabolic process;GO:0006970//response to osmotic stress;GO:0006996//organelle organization;GO:0009267//cellular response to starvation;GO:0009699//phenylpropanoid biosynthetic process;GO:0009739//response to gibberellin;GO:0009755/…
MSTRG.33776	BFRUCT4	0.65	2.76	0	0	0	0	1.07	0	0.1	0.39	0	1.1367	10.15059352	0.001248313	0.013691653	-1.543263209	0.632929481	0.999767122	BnaA09g10570D [Brassica napus]	ko01100//Metabolic pathways;ko00500//Starch and sucrose metabolism;ko00052//Galactose metabolism	GO:0005618//cell wall;GO:0005773//vacuole	GO:0004564//beta-fructofuranosidase activity	GO:0000041//transition metal ion transport;GO:0005984//disaccharide metabolic process;GO:0006575//cellular modified amino acid metabolic process;GO:0006595//polyamine metabolic process;GO:0006970//response to osmotic stress;GO:0006996//organelle organization;GO:0009267//cellular response to starvation;GO:0009699//phenylpropanoid biosynthetic process;GO:0009739//response to gibberellin;GO:0009755/…
MSTRG.33792	At1g29470	1.3	2	2.25	4.77	6.74	5.39	0.45	0.29	0.66	0.4667	5.6333	1.85	-1.60646357	0.00068918	0.008309758	-1.987060944	0.007193072	0.105485438	BnaA09g54540D [Brassica napus]	-	-	-	-
MSTRG.33806	ACS10	2.8	1.93	2.63	12.82	6.95	13.97	0.97	0.76	0.44	0.7233	11.2467	2.4533	-2.196682302	4.08E-06	9.90E-05	-1.762010724	0.008145606	0.11554246	probable aminotransferase ACS10 [Brassica rapa]	-	-	GO:0008483//transaminase activity;GO:0016846//carbon-sulfur lyase activity;GO:0043168//anion binding	GO:0006520//cellular amino acid metabolic process;GO:0009692//ethylene metabolic process
MSTRG.33860	--	0.18	0.29	0.1	0.79	4.14	0.93	0.15	0	0.12	0.09	1.9533	0.19	-3.36186684	0.003600058	0.032594988	-1.078002512	0.745762062	0.999767122	BnaA10g08790D [Brassica napus]	-	-	-	-
MSTRG.33874	--	7.92	14.46	12.4	89.08	261.64	118.5	1.07	2.86	4.91	2.9467	156.4067	11.5933	-3.75393467	2.33E-12	1.75E-10	-1.976139658	0.035476555	0.309978302	Reverse transcriptase RNA-dependent DNA polymerase [Arabidopsis suecica]	-	-	-	-
MSTRG.33875	--	1.28	3.63	3.23	11.12	37.51	15.8	0.33	0.73	1.39	0.8167	21.4767	2.7133	-2.984631895	1.88E-05	0.000377833	-1.732247045	0.113916445	0.605566407	BnaC08g09510D [Brassica napus]	-	-	-	-
MSTRG.3391	--	0.24	0.26	0	4.07	203.05	61.09	0	0.11	0	0.0367	89.4033	0.1667	-9.067219218	2.92E-07	9.33E-06	-2.184424571	0.580550472	0.999767122	BnaA01g25930D [Brassica napus]	-	-	-	-
MSTRG.33914	--	1.19	1.78	0.25	0.11	0.15	0	1.14	0.74	0.55	0.81	0.0867	1.0733	3.63047716	0.000951846	0.010882393	-0.406104375	0.841938371	0.999767122	BnaC09g12140D [Brassica napus]	-	-	-	-
MSTRG.3392	--	7.2	9.2	2.44	52.37	433.4	78.94	0.74	2.53	2.16	1.81	188.2367	6.28	-4.905639309	1.28E-07	4.40E-06	-1.794774862	0.126357067	0.634915841	PREDICTED: wiskott-Aldrich syndrome protein homolog 1-like [Raphanus sativus]	-	-	-	-
MSTRG.3394	--	6.6	9.91	4.82	61.3	585.08	89.94	1.16	2.67	0.44	1.4233	245.44	7.11	-5.109377018	1.65E-08	6.76E-07	-2.320575991	0.027677363	0.265841134	PREDICTED: wiskott-Aldrich syndrome protein homolog 1-like [Raphanus sativus]	-	-	-	-
MSTRG.3396	--	19.89	31.77	26.34	65.42	384.4	67.31	7.41	13.21	12.06	10.8933	172.3767	26	-2.728980972	0.002119857	0.021160075	-1.25506614	0.096918157	0.556746134	BnaA01g27700D [Brassica napus]	-	-	-	-
MSTRG.34099	LHCA3	1.04	0.58	1.26	1.11	1.09	1.07	0.08	0	0.09	0.0567	1.09	0.96	-0.183221824	0.306256312	0.732671799	-4.08246216	0.000550903	0.014708931	BnaA03g60230D [Brassica napus]	ko00196//Photosynthesis - antenna proteins	GO:0009521//photosystem;GO:0031224//intrinsic component of membrane;GO:0031976//plastid thylakoid;GO:0044434//chloroplast part	GO:0043169//cation binding;GO:0046906//tetrapyrrole binding	GO:0000097//sulfur amino acid biosynthetic process;GO:0006091//generation of precursor metabolites and energy;GO:0006464//cellular protein modification process;GO:0009725//response to hormone
MSTRG.34155	--	5.55	5.43	6.19	29.01	158.18	60.3	1.83	5.94	13.53	7.1	82.4967	5.7233	-3.849408289	1.74E-08	7.09E-07	0.310963391	0.218307551	0.799671841	PREDICTED: non-specific lipid-transfer protein 2 [Brassica oleracea var. oleracea] [Brassica oleracea]	-	-	-	GO:0006355//regulation of transcription, DNA-templated;GO:0009891//positive regulation of biosynthetic process;GO:0033036//macromolecule localization;GO:0044763//single-organism cellular process;GO:0044765//single-organism transport;GO:0071702//organic substance transport
MSTRG.34230	IQM2	8.22	4.66	4.1	0.62	1.81	0.31	6.26	0.49	7.23	4.66	0.9133	5.66	2.631588661	5.47E-07	1.65E-05	-0.280472098	0.768270203	0.999767122	IQ domain-containing protein IQM2-like [Brassica napus]	-	-	-	-
MSTRG.34266	At1g54445	0.68	1.04	0.73	5.82	31.82	13.3	0	0.39	0.13	0.1733	16.98	0.8167	-4.377945305	1.67E-07	5.58E-06	-2.236198221	0.222076603	0.805872558	BnaC06g10140D [Brassica napus]	-	-	-	-
MSTRG.34356	--	6.73	6.29	15.92	1.42	1.63	1.21	13.03	28.89	28.23	23.3833	1.42	9.6467	2.764139586	4.72E-13	3.82E-11	1.277378182	0.000967452	0.023049578	unnamed protein product [Brassica napus]	-	-	-	-
MSTRG.34363	SAE1A	0.08	0	0	0.1	0.07	0	1.58	1.71	0.84	1.3767	0.0567	0.0267	-1.087462841	0.888267838	0.987600447	5.689997971	1.96E-05	0.000924912	PREDICTED: SUMO-activating enzyme subunit 1A-like [Raphanus sativus]	ko04120//Ubiquitin mediated proteolysis	-	-	-
MSTRG.34364	SAE1A	0.19	0.47	0.05	0	0.09	0.05	2.66	4.34	1.81	2.9367	0.0467	0.2367	2.342392197	0.04664389	0.230476649	3.633251089	3.99E-07	3.32E-05	BnaAnng25940D, partial [Brassica napus]	ko04120//Ubiquitin mediated proteolysis	-	-	-
MSTRG.34371	NEK3	0.25	0.5	0.53	1.06	1.89	1.65	0.07	0.03	0.29	0.13	1.5333	0.4267	-1.845490051	0.003483393	0.031717804	-1.714597781	0.218287588	0.799671841	BnaC07g49440D [Brassica napus]	-	-	-	-
MSTRG.34421	--	0.04	0	0.08	1.41	0.5	1.78	0	0.05	0	0.0167	1.23	0.04	-4.942514505	0.000132507	0.002062378	-1.263034406	0.846345425	0.999767122	NAC domain-containing protein 41-like [Brassica napus]	-	-	-	GO:0048229//gametophyte development
MSTRG.34467	BP4C	0	0	0.13	0.84	12.76	0.46	0	0	0	0	4.6867	0.0433	-6.756941161	0.001569718	0.016546291	-5.437405312	0.982006263	0.999767122	RecName: Full=Protein BP4C [Brassica napus]	-	-	-	GO:0006950//response to stress
MSTRG.34534	--	1.54	2.06	1.59	5.51	5.44	6.71	0.37	0.51	0.61	0.4967	5.8867	1.73	-1.766678899	6.62E-05	0.001136415	-1.800422208	0.0363508	0.315316475	BnaAnng02060D [Brassica napus]	-	-	-	-
MSTRG.34559	At4g12617	0.59	2.17	1.15	4.88	158.46	42.51	0.27	0.09	0	0.12	68.6167	1.3033	-5.718281031	3.70E-05	0.000681932	-3.441099796	0.027001771	0.261644724	BnaC03g29690D [Brassica napus]	-	GO:0043231//intracellular membrane-bounded organelle	-	-
MSTRG.34633	--	0.1	0.03	0	1.12	0.41	0.67	0	0	0	0	0.7333	0.0433	-4.080919995	0.001568134	0.016533694	-5.437405312	0.519221017	0.999767122	BnaA09g28270D [Brassica napus]	-	-	-	-
MSTRG.34716	SCL30A	0.79	1.15	0.67	0.38	0.55	0.27	1.64	1.89	0.78	1.4367	0.4	0.87	1.121015401	0.004646032	0.039990954	0.723638063	0.034591292	0.304926096	PREDICTED: serine/arginine-rich SC35-like splicing factor SCL33 isoform X1 [Brassica oleracea var. oleracea] [Brassica oleracea]	ko03040//Spliceosome	GO:0016604//nuclear body;GO:0044444//cytoplasmic part	GO:0097159//organic cyclic compound binding	GO:0000377//RNA splicing, via transesterification reactions with bulged adenosine as nucleophile;GO:0006355//regulation of transcription, DNA-templated;GO:0006464//cellular protein modification process;GO:0070918//production of small RNA involved in gene silencing by RNA
MSTRG.3474	TDR	2.66	2.76	2.83	2.41	1.12	1.23	0.12	0.11	0.52	0.25	1.5867	2.75	0.793432546	2.99E-05	0.000565277	-3.459431619	1.80E-05	0.00086062	leucine-rich repeat receptor-like protein kinase TDR [Brassica rapa]	-	GO:0031224//intrinsic component of membrane	GO:0004672//protein kinase activity;GO:0016491//oxidoreductase activity;GO:0032550//purine ribonucleoside binding	GO:0001763//morphogenesis of a branching structure;GO:0006464//cellular protein modification process;GO:0006796//phosphate-containing compound metabolic process;GO:0009799//specification of symmetry;GO:0009933//meristem structural organization;GO:0009943//adaxial/abaxial axis specification;GO:0010065//primary meristem tissue development;GO:0010087//phloem or xylem histogenesis;GO:0044763//single-…
MSTRG.34747	HSL1	2.05	2.14	2.47	9.44	7.52	10.63	0.72	0.47	0.62	0.6033	9.1967	2.22	-2.050551374	4.90E-13	3.94E-11	-1.87953248	1.11E-05	0.000577086	receptor-like protein kinase HSL1 [Brassica rapa]	-	GO:0044464//cell part	GO:0004672//protein kinase activity;GO:0036094//small molecule binding;GO:0097159//organic cyclic compound binding;GO:1901363//heterocyclic compound binding	GO:0000226//microtubule cytoskeleton organization;GO:0005976//polysaccharide metabolic process;GO:0006355//regulation of transcription, DNA-templated;GO:0006468//protein phosphorylation;GO:0007059//chromosome segregation;GO:0007165//signal transduction;GO:0009606//tropism;GO:0009793//embryo development ending in seed dormancy;GO:0009826//unidimensional cell growth;GO:0010029//regulation of seed g…
MSTRG.34997	PAHX	0	0.05	0	0.44	8.05	0.83	0	0	0	0	3.1067	0.0167	-7.54225805	9.46E-05	0.00154712	-4.058893689	0.982006263	0.999767122	PREDICTED: phytanoyl-CoA dioxygenase-like isoform X1 [Raphanus sativus]	ko04146//Peroxisome	GO:0016020//membrane	GO:0016706//oxidoreductase activity, acting on paired donors, with incorporation or reduction of molecular oxygen, 2-oxoglutarate as one donor, and incorporation of one atom each of oxygen into both donors;GO:0019842//vitamin binding;GO:0043169//cation binding	GO:0032787//monocarboxylic acid metabolic process
MSTRG.35004	BGLU11	0.83	2.14	0.68	0.55	0.58	0.36	0.74	0.24	0.24	0.4067	0.4967	1.2167	1.292584133	0.001665841	0.017393395	-1.581015316	0.205058789	0.780202115	BnaA09g18550D [Brassica napus]	ko01100//Metabolic pathways;ko01110//Biosynthesis of secondary metabolites;ko00940//Phenylpropanoid biosynthesis;ko00500//Starch and sucrose metabolism;ko00460//Cyanoamino acid metabolism	-	-	-
MSTRG.35035	--	0.86	1.57	1.31	0.14	0	0.05	0.96	1.01	0.91	0.96	0.0633	1.2467	4.298966946	3.51E-07	1.10E-05	-0.376969458	0.669203094	0.999767122	-	-	-	-	-
MSTRG.35057	At5g46871	19.23	16.68	34.25	37.76	70.52	42.69	3.18	5.52	3.44	4.0467	50.3233	23.3867	-1.10554124	0.202106459	0.588595235	-2.530880326	0.000146032	0.004996615	defensin-like protein 308 [Brassica rapa]	-	-	-	GO:0001906//cell killing;GO:0009620//response to fungus
MSTRG.35063	At5g46871	73.84	62.19	252.71	211.05	195.93	169.47	2.7	3.53	14.81	7.0133	192.15	129.58	-0.568389913	0.916534646	0.987600447	-4.207598954	2.01E-05	0.000944749	BnaA08g04760D [Brassica napus]	-	-	-	GO:0001906//cell killing;GO:0009620//response to fungus
MSTRG.35132	ALA9	10.77	7.44	7.08	10.27	7.44	5.2	1.1	1.37	1.52	1.33	7.6367	8.43	0.142589578	0.02163194	0.132043088	-2.664106385	1.25E-07	1.20E-05	HAD-like superfamily [Arabidopsis thaliana x Arabidopsis arenosa]	-	GO:0009526//plastid envelope;GO:0016020//membrane	GO:0042625//ATPase coupled ion transmembrane transporter activity;GO:0046872//metal ion binding	GO:0015914//phospholipid transport
MSTRG.35167	--	1.67	1.94	1.9	2.65	1.93	1.9	4.24	5.79	4.21	4.7467	2.16	1.8367	-0.233941494	0.214172793	0.608248442	1.369824922	7.41E-08	7.63E-06	hypothetical protein F2Q69_00057623 [Brassica cretica]	-	-	-	-
MSTRG.35403	PRS2	0.63	1.03	0.74	0.8	1.51	1.22	1.96	1.97	0.97	1.6333	1.1767	0.8	-0.556633778	0.872526314	0.987600447	1.029747343	0.00036491	0.010560085	PREDICTED: ribose-phosphate pyrophosphokinase 2, chloroplastic [Brassica oleracea var. oleracea] [Brassica oleracea]	ko01100//Metabolic pathways;ko01110//Biosynthesis of secondary metabolites;ko01200//Carbon metabolism;ko01230//Biosynthesis of amino acids;ko00230//Purine metabolism;ko00030//Pentose phosphate pathway	GO:0009536//plastid	GO:0016778//diphosphotransferase activity;GO:0032550//purine ribonucleoside binding;GO:0046872//metal ion binding	GO:0006464//cellular protein modification process;GO:0006779//porphyrin-containing compound biosynthetic process;GO:0009117//nucleotide metabolic process;GO:0009124//nucleoside monophosphate biosynthetic process
MSTRG.35450	--	0	0.15	0.14	1.49	1.83	0.87	0	0	0	0	1.3967	0.0967	-3.852825439	0.001538455	0.016289488	-6.594946589	0.61405103	0.999767122	BnaA05g20700D [Brassica napus]	-	-	-	-
MSTRG.35515	--	0.65	0.29	0	0.02	0.02	0	0.34	0	0.02	0.12	0.0133	0.3133	4.554588852	0.004646491	0.039990954	-1.38466385	0.675314774	0.999767122	BnaC07g06740D [Brassica napus]	-	-	-	-
MSTRG.35531	--	1.07	0.35	0.84	0	0	0	0.09	0	0.07	0.0533	0	0.7533	9.557144557	9.11E-07	2.60E-05	-3.820178962	0.009318479	0.126832859	unnamed protein product [Brassica napus]	-	-	-	-
MSTRG.35536	YUC10	7.77	7.03	13.63	4.18	2.93	1.29	2.68	0.9	7.86	3.8133	2.8	9.4767	1.758952866	2.24E-07	7.35E-06	-1.313327047	0.308075325	0.905402793	probable indole-3-pyruvate monooxygenase YUCCA10 [Brassica rapa]	ko01100//Metabolic pathways;ko00380//Tryptophan metabolism	-	GO:0000166//nucleotide binding;GO:0016709//oxidoreductase activity, acting on paired donors, with incorporation or reduction of molecular oxygen, NAD(P)H as one donor, and incorporation of one atom of oxygen	GO:0009653//anatomical structure morphogenesis;GO:0009850//auxin metabolic process;GO:0042743//hydrogen peroxide metabolic process;GO:0044710//single-organism metabolic process
MSTRG.35603	EXO84C	2.1	1.6	0.05	0	0.08	0.04	1.86	0.11	1.36	1.11	0.04	1.25	4.965784285	0.00033038	0.004472835	-0.171368418	0.785490899	0.999767122	BnaC04g28720D [Brassica napus]	-	GO:0043231//intracellular membrane-bounded organelle	-	GO:0007154//cell communication;GO:0009791//post-embryonic development;GO:0009799//specification of symmetry;GO:0009933//meristem structural organization;GO:0030422//production of siRNA involved in RNA interference;GO:0045087//innate immune response
MSTRG.35631	--	1.3	1.14	1.3	0.13	0.32	0	2.04	3.86	2.26	2.72	0.15	1.2467	3.055041364	2.23E-05	0.000438046	1.125530882	0.000506108	0.013751888	hypothetical protein BRARA_I02820 [Brassica rapa]	-	-	-	-
MSTRG.35634	--	0.5	0.73	0.35	0.16	0.14	0.18	0.1	0.11	0.28	0.1633	0.16	0.5267	1.718818247	6.94E-08	2.51E-06	-1.689070904	0.092162748	0.541352978	BnaA09g26190D [Brassica napus]	-	-	-	-
MSTRG.357	--	12.17	10.31	12.82	41.24	35.98	23.34	5.39	6.36	3.3	5.0167	33.52	11.7667	-1.510316466	0.000522537	0.006607995	-1.229904697	0.092306741	0.541837175	hypothetical protein BRARA_A00205 [Brassica rapa]	-	-	-	-
MSTRG.35789	SNL3	0	0.24	0	0.24	17.63	1.96	0	0.12	0	0.04	6.61	0.08	-6.368506462	0.00088575	0.01022577	-1	0.94025418	0.999767122	PREDICTED: paired amphipathic helix protein Sin3-like 3 [Raphanus sativus]	-	GO:0043231//intracellular membrane-bounded organelle	-	GO:0001101//response to acid chemical;GO:0006355//regulation of transcription, DNA-templated
MSTRG.36291	GATA8	12.43	10.52	10.03	15.58	10.57	16.16	4.45	2.86	4.08	3.7967	14.1033	10.9933	-0.359407287	0.242056723	0.650071812	-1.533823652	0.000285317	0.008595815	GATA transcription factor 8 isoform X2 [Brassica rapa]	-	GO:0043231//intracellular membrane-bounded organelle	GO:0003677//DNA binding;GO:0046914//transition metal ion binding	GO:0006355//regulation of transcription, DNA-templated;GO:0044707//single-multicellular organism process;GO:0048511//rhythmic process
MSTRG.36565	--	0.46	1.19	1.15	0	0.15	0.07	0.04	0.15	0.26	0.15	0.0733	0.9333	3.669851398	5.02E-06	0.000118862	-2.637429921	0.032847725	0.295147484	hypothetical protein HID58_035590, partial [Brassica napus]	-	-	-	-
MSTRG.36578	--	6	5.16	6.05	0.18	0.03	4.54	11.73	19.87	12.48	14.6933	1.5833	5.7367	1.857247679	1	1	1.356877127	1.25E-07	1.20E-05	unnamed protein product [Brassica napus]	-	-	-	-
MSTRG.36837	PME36	26.72	11.59	18.75	0.74	2.05	0.29	67.7	55.03	72.44	65.0567	1.0267	19.02	4.211477491	2.76E-13	2.29E-11	1.774179658	3.09E-09	4.75E-07	probable pectinesterase/pectinesterase inhibitor 36 [Brassica rapa]	-	-	-	-
MSTRG.37116	--	6.47	5.2	13.52	0.61	0.77	0.82	3.13	5.68	4.62	4.4767	0.7333	8.3967	3.517275693	2.93E-23	7.08E-21	-0.907391817	0.673802063	0.999767122	unnamed protein product [Brassica napus]	-	-	-	-
MSTRG.37171	GGP5	0	0.05	0	1.56	0.52	0.82	0	0	0	0	0.9667	0.0167	-5.857980995	0.000259424	0.003649416	-4.058893689	0.982006263	0.999767122	Glutamine amidotransferase [Arabidopsis thaliana x Arabidopsis arenosa]	-	-	GO:0003824//catalytic activity	GO:0006950//response to stress;GO:0009064//glutamine family amino acid metabolic process
MSTRG.37247	--	0.44	0.11	0.2	0.05	0	0	4.21	6.72	0.83	3.92	0.0167	0.25	3.906890596	0.003457411	0.03151499	3.970853654	1.40E-06	9.75E-05	BnaA04g12410D [Brassica napus]	-	-	-	-
MSTRG.37497	--	1.69	3.12	1.62	8.78	5.48	6.95	0.1	0.18	0.13	0.1367	7.07	2.1433	-1.721853978	0.003426379	0.03131273	-3.971122923	2.56E-05	0.001156717	DEAD-box ATP-dependent RNA helicase 36 [Brassica napus]	-	GO:0042995//cell projection;GO:0043231//intracellular membrane-bounded organelle	GO:0032550//purine ribonucleoside binding;GO:0042623//ATPase activity, coupled	GO:0006886//intracellular protein transport;GO:0016072//rRNA metabolic process;GO:0048229//gametophyte development
MSTRG.37724	CYP71B7	0.68	0.15	0.32	0	0.13	0.08	1.03	0.33	0.6	0.6533	0.07	0.3833	2.453172628	0.005298862	0.044434833	0.769219793	0.1122899	0.600976898	PREDICTED: cytochrome P450 71B7-like [Raphanus sativus]	-	-	-	-
MSTRG.37903	SPH5	3.67	1.65	6.62	110.37	13.91	142.97	0	0.47	0.58	0.35	89.0833	3.98	-4.484315206	1.25E-06	3.49E-05	-3.507341604	0.008756169	0.121618599	BnaC05g23870D [Brassica napus]	-	-	-	-
MSTRG.3797	--	4.93	4.63	3.85	14.5	8.88	11.08	2.77	1.53	2.1	2.1333	11.4867	4.47	-1.361613464	0.003973513	0.035289078	-1.067165427	0.140012746	0.663187189	BnaAnng04500D [Brassica napus]	-	-	-	-
MSTRG.38084	At3g07100	0	0.36	0.26	3.14	3.56	4.2	0	0	0.05	0.0167	3.6333	0.2067	-4.135916109	2.08E-07	6.86E-06	-3.632268215	0.422684984	0.984510479	BnaA05g30470D [Brassica napus]	ko04141//Protein processing in endoplasmic reticulum	-	-	-
MSTRG.38159	NET3A	0.08	0.08	0.04	1.33	0.66	1.89	0.46	0.4	0.1	0.32	1.2933	0.0667	-4.277984747	5.45E-05	0.000957574	2.263034406	0.013580617	0.165384171	protein NETWORKED 3A isoform X2 [Brassica rapa]	-	-	-	-
MSTRG.38211	At1g50590	0.76	0.49	0.44	0.52	0.57	1.28	1.68	1.9	0.98	1.52	0.79	0.5633	-0.487863813	0.839749912	0.987600447	1.432010578	0.000313506	0.009297178	pirin-like protein At1g50590 [Brassica rapa]	-	GO:0043231//intracellular membrane-bounded organelle	GO:0005515//protein binding	-
MSTRG.38250	--	0.72	0.47	0.94	0.05	0	0	0.04	0.11	0.99	0.38	0.0167	0.71	5.412781525	5.09E-06	0.000120289	-0.901819606	0.784794443	0.999767122	BnaC01g43360D [Brassica napus]	-	-	-	-
MSTRG.3832	RDR1	0.03	0.01	0.05	0.15	3.36	0.74	0	0.03	0	0.01	1.4167	0.03	-5.56139403	4.27E-05	0.00077276	-1.584962501	0.703005781	0.999767122	RNA-dependent RNA polymerase 1-like [Brassica napus]	-	-	GO:0016740//transferase activity;GO:0097159//organic cyclic compound binding	GO:0006605//protein targeting;GO:0006952//defense response;GO:0009058//biosynthetic process;GO:0009755//hormone-mediated signaling pathway;GO:0009863//salicylic acid mediated signaling pathway;GO:0010468//regulation of gene expression;GO:0031399//regulation of protein modification process;GO:0035556//intracellular signal transduction;GO:0042743//hydrogen peroxide metabolic process;GO:0043067//reg…
MSTRG.38484	--	1.76	1.35	3.63	0	0.09	0.09	1	0	1.75	0.9167	0.06	2.2467	5.22667978	4.43E-06	0.00010642	-1.293316973	0.523050905	0.999767122	LOW QUALITY PROTEIN: hypothetical protein HID58_013523 [Brassica napus]	-	-	-	-
MSTRG.38512	RAD16	0.46	0.56	0.71	1.85	1.34	1.67	0.09	0.04	0.23	0.12	1.62	0.5767	-1.490184276	0.00454797	0.039321502	-2.264703226	0.025398679	0.251773105	ATP-dependent helicase rhp16 isoform X2 [Brassica rapa]	-	GO:0043231//intracellular membrane-bounded organelle	GO:0003676//nucleic acid binding;GO:0003824//catalytic activity;GO:0032550//purine ribonucleoside binding;GO:0046872//metal ion binding	-
MSTRG.38631	CTN	0.44	0.37	0.22	1.6	1.06	1.19	0.46	0.55	0.53	0.5133	1.2833	0.3433	-1.902214108	0.002397963	0.023471698	0.580286014	0.026645075	0.25960008	cactin [Brassica rapa]	-	-	-	-
MSTRG.38654	ACT5	0.05	0	0	0.24	1.77	0.25	0	0	0.04	0.0133	0.7533	0.0167	-5.498250868	0.004788639	0.040963771	-0.321928095	0.999595243	0.999767122	BnaC04g48100D [Brassica napus]	-	GO:0005856//cytoskeleton;GO:0005911//cell-cell junction;GO:0009526//plastid envelope;GO:0009532//plastid stroma;GO:0016020//membrane	GO:0036094//small molecule binding;GO:0097159//organic cyclic compound binding;GO:1901363//heterocyclic compound binding	GO:0006006//glucose metabolic process;GO:0007010//cytoskeleton organization;GO:0051603//proteolysis involved in cellular protein catabolic process
MSTRG.38721	At1g50870	0	0	0	0	2.64	0.97	0	0	0	0	1.2033	0	-10.23282062	0.004922739	0.041909365	0	1	1	BnaC05g01760D [Brassica napus]	-	-	-	GO:0007154//cell communication;GO:0009737//response to abscisic acid;GO:0050794//regulation of cellular process;GO:0071229//cellular response to acid chemical;GO:1901701//cellular response to oxygen-containing compound
MSTRG.38750	BGLU11	3.13	14.45	8.87	0.98	0.95	0.43	9.04	36.54	20.44	22.0067	0.7867	8.8167	3.486408958	2.31E-12	1.74E-10	1.319635416	0.007855668	0.112567039	PREDICTED: beta-glucosidase 11 isoform X2 [Brassica oleracea var. oleracea] [Brassica oleracea]	ko01100//Metabolic pathways;ko01110//Biosynthesis of secondary metabolites;ko00940//Phenylpropanoid biosynthesis;ko00500//Starch and sucrose metabolism;ko00460//Cyanoamino acid metabolism	-	GO:0015926//glucosidase activity	GO:0044238//primary metabolic process
MSTRG.38808	KCS1	0.15	0.96	0.37	0.84	2.35	0.99	4.02	3.81	3.34	3.7233	1.3933	0.4933	-1.497905766	0.244690033	0.653632956	2.915960105	1.32E-07	1.26E-05	3-ketoacyl-CoA synthase 1 [Brassica rapa]	ko01100//Metabolic pathways;ko01110//Biosynthesis of secondary metabolites;ko04626//Plant-pathogen interaction;ko00062//Fatty acid elongation	GO:0005840//ribosome;GO:0031224//intrinsic component of membrane;GO:0043231//intracellular membrane-bounded organelle	GO:0004312//fatty acid synthase activity	GO:0006631//fatty acid metabolic process;GO:0006950//response to stress;GO:0007275//multicellular organism development;GO:0009699//phenylpropanoid biosynthetic process
MSTRG.38852	NAC002	15.78	24.68	13.71	6.01	12.28	5.11	38.51	58.79	31.87	43.0567	7.8	18.0567	1.210985561	5.66E-06	0.000132104	1.253705044	9.55E-06	0.000505858	NAC domain-containing protein 2 [Brassica rapa]	-	GO:0043231//intracellular membrane-bounded organelle	GO:0001071//nucleic acid binding transcription factor activity	GO:0006972//hyperosmotic response;GO:0009404//toxin metabolic process;GO:0009694//jasmonic acid metabolic process;GO:0009787//regulation of abscisic acid-activated signaling pathway;GO:0010243//response to organonitrogen compound;GO:0010468//regulation of gene expression;GO:0014070//response to organic cyclic compound;GO:0034645//cellular macromolecule biosynthetic process;GO:0044707//single-mult…
MSTRG.3897	--	1.5	0.49	1.33	0.26	0.25	0.37	0.22	0.17	0.29	0.2267	0.2933	1.1067	1.915607813	0.000850563	0.009897529	-2.28757659	0.062972059	0.440024506	BnaC04g51240D [Brassica napus]	-	-	-	-
MSTRG.39119	--	0.73	0.52	0.13	0.08	0.06	0	0.88	0	0	0.2933	0.0467	0.46	3.301169535	0.005039418	0.042671857	-0.649092838	0.947846078	0.999767122	hypothetical protein DY000_02032401 [Brassica cretica]	-	-	-	-
MSTRG.39148	--	1.15	0.14	0.6	0	0	0	0.8	0.13	1.18	0.7033	0	0.63	9.299208018	1.18E-05	0.000250565	0.158856764	0.513853405	0.999767122	-	-	-	-	-
MSTRG.39222	--	3.64	5	3.17	0.95	1.01	0.99	1.53	1.08	1.35	1.32	0.9833	3.9367	2.001222105	5.28E-22	1.14E-19	-1.576436629	0.002726505	0.051064908	F-box protein At1g52495-like [Brassica rapa]	-	-	-	-
MSTRG.39237	AHA3	1.45	2.5	0.95	7.31	5.93	6.29	0.47	0.17	0.7	0.4467	6.51	1.6333	-1.994838295	0.000144815	0.002224604	-1.870548749	0.044912553	0.359273951	ATPase 3, plasma membrane-type [Brassica rapa]	ko00190//Oxidative phosphorylation	GO:0005911//cell-cell junction;GO:0031090//organelle membrane;GO:0031224//intrinsic component of membrane;GO:0043231//intracellular membrane-bounded organelle;GO:0044444//cytoplasmic part	GO:0008324//cation transmembrane transporter activity;GO:0015662//ATPase activity, coupled to transmembrane movement of ions, phosphorylative mechanism;GO:0032550//purine ribonucleoside binding;GO:0046872//metal ion binding	GO:0001101//response to acid chemical;GO:0006464//cellular protein modification process;GO:0006865//amino acid transport;GO:0006950//response to stress;GO:0009152//purine ribonucleotide biosynthetic process;GO:0009664//plant-type cell wall organization;GO:0010383//cell wall polysaccharide metabolic process;GO:0015698//inorganic anion transport;GO:0015833//peptide transport;GO:0015988//energy coup…
MSTRG.39355	--	0	0.54	0	6.64	18.23	7.91	0	0	0	0	10.9267	0.18	-5.923712637	1.18E-06	3.30E-05	-7.491853096	0.559739474	0.999767122	BnaA10g29580D [Brassica napus]	-	-	-	-
MSTRG.39445	OVA6	0.27	0.48	0.73	0.14	0.1	0.03	2.58	2.23	1.46	2.09	0.09	0.4933	2.454565863	0.000352278	0.004721915	2.082868267	1.61E-06	0.000110753	proline--tRNA ligase, chloroplastic/mitochondrial isoform X2 [Brassica napus]	ko00970//Aminoacyl-tRNA biosynthesis	GO:0009532//plastid stroma	GO:0004812//aminoacyl-tRNA ligase activity;GO:0032550//purine ribonucleoside binding	GO:0003006//developmental process involved in reproduction;GO:0006418//tRNA aminoacylation for protein translation;GO:0009668//plastid membrane organization;GO:0009791//post-embryonic development;GO:0015979//photosynthesis;GO:0048229//gametophyte development
MSTRG.3950	--	0.5	1.48	0.47	4.3	7.71	2.16	0.46	0.07	0.19	0.24	4.7233	0.8167	-2.531986104	0.003613232	0.032693363	-1.766712938	0.204448293	0.779267134	nucleolin [Brassica rapa]	-	-	-	GO:0007049//cell cycle;GO:0051052//regulation of DNA metabolic process
MSTRG.39534	--	0.54	2.63	0	0.1	0.05	0	0.05	0	0.1	0.05	0.05	1.0567	4.401448435	0.005335839	0.04467878	-4.401448435	0.053063618	0.397300058	Zinc finger CCHC-type [Arabidopsis thaliana x Arabidopsis arenosa]	-	-	-	-
MSTRG.39913	DTX25	8.88	5.42	7.31	5.01	1.39	3.63	12.62	6.16	28.09	15.6233	3.3433	7.2033	1.107377466	0.000269629	0.003771104	1.116965723	0.00465626	0.076858819	protein DETOXIFICATION 25 isoform X1 [Brassica rapa]	-	GO:0016020//membrane	GO:0022857//transmembrane transporter activity	-
MSTRG.40007	--	0.42	0.24	0.63	0.14	0.3	0.74	0.91	1.34	1.22	1.1567	0.3933	0.43	0.128584206	0.349013707	0.780274997	1.427564597	0.000194927	0.006326705	multidrug resistance protein 2 isoform X1 [Brassica rapa]	-	GO:0031224//intrinsic component of membrane	GO:0042895//antibiotic transporter activity	GO:0044763//single-organism cellular process;GO:0045491//xylan metabolic process
MSTRG.4035	--	0.26	1.25	0.52	1.2	4.6	0.53	0	0	0	0	2.11	0.6767	-1.640725772	0.270618645	0.688917472	-9.402301511	0.000379852	0.010934196	BnaUnng05000D, partial [Brassica napus]	-	-	-	-
MSTRG.40380	DIT1	1.5	1.8	1.32	6.86	5.83	7.34	0.69	0.68	0.36	0.5767	6.6767	1.54	-2.116197664	1.05E-12	8.13E-11	-1.417120814	0.06286453	0.439538952	dicarboxylate transporter 1, chloroplastic [Brassica napus]	-	GO:0009528//plastid inner membrane;GO:0031224//intrinsic component of membrane;GO:0031976//plastid thylakoid	GO:0015140//malate transmembrane transporter activity	GO:0006536//glutamate metabolic process;GO:0006694//steroid biosynthetic process;GO:0006970//response to osmotic stress;GO:0009746//response to hexose;GO:0015729//oxaloacetate transport;GO:0015743//malate transport;GO:0015813//L-glutamate transport;GO:0030001//metal ion transport;GO:0040007//growth;GO:0042044//fluid transport;GO:0042546//cell wall biogenesis;GO:0051273//beta-glucan metabolic proc…
MSTRG.40453	MYB3R4	0.82	0.43	1	4.03	3.19	4.9	0.36	0.13	0.42	0.3033	4.04	0.75	-2.429392792	1.76E-06	4.68E-05	-1.305986551	0.242017145	0.831965224	LOW QUALITY PROTEIN: transcription factor MYB3R-4-like [Brassica rapa]	-	-	-	-
MSTRG.40566	--	1.06	2.46	1.51	0.63	0.67	0.27	2.42	0.7	2.19	1.77	0.5233	1.6767	1.679793841	0.000192433	0.002829268	0.078153461	0.32171736	0.918112907	hypothetical protein IGI04_041687 [Brassica rapa subsp. trilocularis] [Brassica rapa]	-	-	-	-
MSTRG.40627	--	13.46	18.33	35.15	92.63	127.66	94.21	2.05	3.24	11.05	5.4467	104.8333	22.3133	-2.232119561	1.85E-05	0.000373069	-2.034460568	0.055195512	0.407043954	defensin-like protein 112 [Capsella rubella]	-	-	-	-
MSTRG.40628	--	6.32	5.99	7.9	25.35	48.57	17.48	0.96	2.22	3.43	2.2033	30.4667	6.7367	-2.177124844	0.000365409	0.004860801	-1.612347145	0.086318466	0.523801914	unnamed protein product [Brassica rapa]	-	-	-	-
MSTRG.40649	--	4.44	3.5	3.37	33.45	34.03	17.13	0.51	0.11	1.45	0.69	28.2033	3.77	-2.903229255	4.98E-12	3.55E-10	-2.449896256	0.024712517	0.247502046	unnamed protein product [Brassica napus]	-	-	-	-
MSTRG.40711	ROPGEF5	0.32	0.07	2.35	0.14	0	0.09	2.27	0.14	0.8	1.07	0.0767	0.9133	3.574470127	0.005729302	0.047260905	0.228397404	0.569045585	0.999767122	rop guanine nucleotide exchange factor 5 [Brassica rapa]	-	-	-	-
MSTRG.41112	--	2.65	3.74	4.31	1.68	3.27	2.11	5.45	8.03	13.42	8.9667	2.3533	3.5667	0.599870708	0.000963049	0.010987505	1.329995376	3.67E-05	0.001565945	PREDICTED: cysteine-rich and transmembrane domain-containing protein A [Brassica oleracea var. oleracea] [Brassica oleracea]	-	GO:0016020//membrane	-	GO:0006605//protein targeting;GO:0009891//positive regulation of biosynthetic process;GO:0043067//regulation of programmed cell death
MSTRG.41268	--	0.59	0.79	1.62	0	0.01	0	1.09	0.04	5.36	2.1633	0.0033	1	8.22881869	3.32E-11	2.10E-09	1.113255978	0.179688744	0.741387909	methylsterol monooxygenase 2-1-like [Brassica napus]	ko01100//Metabolic pathways;ko01110//Biosynthesis of secondary metabolites;ko00100//Steroid biosynthesis	-	-	-
MSTRG.4128	RLP35	0.63	0.2	0.41	0.05	0.02	0.01	0.29	0.05	0.33	0.2233	0.0267	0.4133	3.95419631	2.73E-07	8.78E-06	-0.88810712	0.702056695	0.999767122	receptor-like protein 12 [Brassica napus]	-	-	-	-
MSTRG.4148	--	0	0	0	0.23	1.64	0.12	0	0	0	0	0.6633	0	-9.373590215	0.003780231	0.033876183	0	1	1	uncharacterized protein LOC117129335 [Brassica rapa]	-	-	-	-
MSTRG.41535	--	0.91	1.8	3.27	0.3	1.39	0.8	16.15	11.59	13.3	13.68	0.83	1.9933	1.263999742	0.00827502	0.063422806	2.778813341	4.00E-11	9.90E-09	PREDICTED: monoacylglycerol lipase ABHD6-like [Brassica oleracea var. oleracea] [Brassica oleracea]	-	-	GO:0003824//catalytic activity	GO:0030001//metal ion transport
MSTRG.41680	At5g57670	0.09	0.12	0.23	0	0	0.02	0.03	0	0.12	0.05	0.0067	0.1467	4.459431619	0.001848514	0.01889219	-1.552541023	0.469288871	0.999767122	receptor-like cytosolic serine/threonine-protein kinase RBK2 isoform X2 [Brassica rapa]	-	GO:0016020//membrane;GO:0043231//intracellular membrane-bounded organelle	GO:0004672//protein kinase activity;GO:0032550//purine ribonucleoside binding	GO:0006464//cellular protein modification process;GO:0006796//phosphate-containing compound metabolic process;GO:0009755//hormone-mediated signaling pathway
MSTRG.41791	--	1.03	0.76	0.59	1.9	5.15	5.09	0	0	0.31	0.1033	4.0467	0.7933	-2.350734943	0.004267001	0.037352086	-2.940621453	0.11864158	0.616675715	BnaC04g21690D [Brassica napus]	-	-	-	-
MSTRG.42038	--	3.57	2.66	0.25	0	0	0	3.06	0.16	1.14	1.4533	0	2.16	11.0768156	5.15E-05	0.000911679	-0.571665678	0.973539071	0.999767122	LOW QUALITY PROTEIN: hypothetical protein HID58_013523 [Brassica napus]	-	-	-	-
MSTRG.42124	--	1.07	0.32	1.19	0.08	0	0.06	0.9	1.42	1.47	1.2633	0.0467	0.86	4.203872333	4.96E-07	1.51E-05	0.554826783	0.072561093	0.476758114	BnaC05g29090D [Brassica napus]	-	-	-	-
MSTRG.42125	--	6.01	2.37	15.55	0.47	2.93	2.21	6.38	4.15	12.39	7.64	1.87	7.9767	2.092747721	0.001453904	0.015537404	-0.062213353	0.51558827	0.999767122	hypothetical protein DY000_02003931 [Brassica cretica]	-	-	-	-
MSTRG.4214	--	0	0.15	0	2.64	1.38	5.56	0.17	0.1	0.1	0.1233	3.1933	0.05	-5.99699125	6.97E-05	0.001188318	1.30256277	0.417727776	0.983051954	PREDICTED: probable histone H2A.7 [Brassica oleracea var. oleracea] [Brassica oleracea]	-	GO:0000785//chromatin	GO:0005488//binding	-
MSTRG.42335	XTH29	0.25	0.74	0.48	1.14	3.47	4.17	0.56	0.86	0.55	0.6567	2.9267	0.49	-2.578404785	0.005041076	0.04267739	0.422379475	0.174181582	0.732655537	probable xyloglucan endotransglucosylase/hydrolase protein 29 isoform X1 [Brassica rapa]	-	GO:0005576//extracellular region;GO:0030312//external encapsulating structure	GO:0016758//transferase activity, transferring hexosyl groups;GO:0016787//hydrolase activity	GO:0044042//glucan metabolic process;GO:0045229//external encapsulating structure organization
MSTRG.42369	--	0.13	0.05	0.19	1.02	0.43	1.35	0.17	0	0.18	0.1167	0.9333	0.1233	-2.919829651	0.002755035	0.026297391	-0.080170349	0.722720837	0.999767122	Harbinger transposase-derived protein [Arabidopsis suecica]	-	-	-	-
MSTRG.42554	--	0.73	0.78	0.96	3.03	2.26	3.05	0.37	0.3	0.39	0.3533	2.78	0.8233	-1.755536342	0.004662114	0.040099531	-1.220446777	0.367218733	0.953410102	unnamed protein product [Brassica napus]	-	-	-	-
MSTRG.4263	CAT7	0.02	0.06	0.06	0.38	1.37	1.22	0	0.07	0.05	0.04	0.99	0.0467	-4.406964199	1.13E-05	0.000241603	-0.222392421	0.767769492	0.999767122	cationic amino acid transporter 7, chloroplastic [Brassica rapa]	-	GO:0031224//intrinsic component of membrane;GO:0042170//plastid membrane	GO:0015171//amino acid transmembrane transporter activity	GO:0006865//amino acid transport;GO:0051707//response to other organism
MSTRG.42844	--	0.15	0.1	0.33	1.21	1.22	2.62	0	0.04	0	0.0133	1.6833	0.1933	-3.122158583	0.000272189	0.003800051	-3.857980995	0.080348062	0.50295657	hypothetical protein DY000_02038204 [Brassica cretica]	-	-	-	-
MSTRG.4291	At3g10195	0.11	0.12	0.12	1.86	3.62	4.4	0	0	0	0	3.2933	0.1167	-4.819084215	5.56E-05	0.000974733	-6.866248611	0.652612058	0.999767122	BnaC01g38770D [Brassica napus]	-	-	-	GO:0051704//multi-organism process
MSTRG.4292	At3g10195	1.78	0.72	0.48	12.7	57.42	9.02	0	0	0	0	26.38	0.9933	-4.73102283	2.36E-06	6.11E-05	-9.956134115	0.01915005	0.208345383	BnaC01g38780D [Brassica napus]	-	-	-	-
MSTRG.4305	--	0	0	0.05	0.25	2.58	0.61	0	0	0	0	1.1467	0.0167	-6.10433666	0.001207174	0.013336827	-4.058893689	0.982006263	0.999767122	unnamed protein product [Brassica napus]	-	-	-	-
MSTRG.43360	CYS4	6.37	8.92	11.42	1.05	5.33	1.88	11.88	13.92	16.95	14.25	2.7533	8.9033	1.693166289	8.71E-05	0.001439251	0.678544444	0.000187168	0.006121225	cysteine proteinase inhibitor 4 isoform X2 [Brassica rapa]	-	GO:0030312//external encapsulating structure	GO:0004866//endopeptidase inhibitor activity	GO:0010466//negative regulation of peptidase activity
MSTRG.43372	--	1.91	2.43	2.55	0.55	1.36	1.29	1.89	4.17	3.51	3.19	1.0667	2.2967	1.106432078	3.75E-05	0.000689876	0.474014942	0.022669456	0.233732514	unnamed protein product [Brassica napus]	-	-	-	-
MSTRG.43544	--	1.32	1.08	1.86	0.85	0.99	0.55	9.37	4.31	4.13	5.9367	0.7967	1.42	0.833842812	0.000521143	0.006595267	2.063762181	3.98E-08	4.47E-06	Transposon En/Spm-like [Arabidopsis thaliana x Arabidopsis arenosa]	-	-	-	-
MSTRG.43584	--	0.05	0.05	0	0	0	0.09	0.22	1.34	0.62	0.7267	0.03	0.0333	0.152003093	0.785172413	0.982342037	4.44625623	0.000815089	0.020169135	BnaC09g52420D [Brassica napus]	ko03420//Nucleotide excision repair;ko03440//Homologous recombination;ko03030//DNA replication;ko03430//Mismatch repair	-	-	-
MSTRG.43719	VPS45	0.34	0.57	0.64	2.11	2.56	3.34	0.11	0.17	0.17	0.15	2.67	0.5167	-2.369534027	1.25E-05	0.000263846	-1.784271309	0.116326576	0.611520304	vacuolar protein sorting-associated protein 45 homolog isoform X2 [Brassica napus]	ko04144//Endocytosis	GO:0005774//vacuolar membrane;GO:0031984//organelle subcompartment	GO:0005488//binding;GO:0022892//substrate-specific transporter activity	GO:0006605//protein targeting;GO:0006865//amino acid transport;GO:0015672//monovalent inorganic cation transport;GO:0015748//organophosphate ester transport;GO:0016482//cytoplasmic transport;GO:0043067//regulation of programmed cell death;GO:0048278//vesicle docking;GO:0051049//regulation of transport;GO:0051707//response to other organism;GO:0061024//membrane organization;GO:0070838//divalent me…
MSTRG.43801	--	0.57	0.45	0.45	0.14	0	0	0.06	1.25	0.51	0.6067	0.0467	0.49	3.392317423	0.001051899	0.011858778	0.308122295	0.404887559	0.974072267	hypothetical protein DY000_02055226 [Brassica cretica]	-	-	-	-
MSTRG.43809	--	0.92	0.48	0.29	0	0.03	0.03	3.78	5.83	0.37	3.3267	0.02	0.5633	4.815916936	2.31E-05	0.000451266	2.562016569	0.001400135	0.030749345	HR-like lesion-inducer [Arabidopsis thaliana x Arabidopsis arenosa]	-	GO:0043231//intracellular membrane-bounded organelle	-	GO:0009605//response to external stimulus;GO:0009628//response to abiotic stimulus;GO:0033554//cellular response to stress;GO:0044699//single-organism process;GO:1901700//response to oxygen-containing compound
MSTRG.44024	XTH11	0.33	0	0.28	0	1.3	0.14	1.48	2.67	0.86	1.67	0.48	0.2033	-1.239187664	0.750201045	0.978449514	3.037929456	0.000654326	0.016915689	PREDICTED: probable xyloglucan endotransglucosylase/hydrolase protein 11 [Brassica oleracea var. oleracea] [Brassica oleracea]	-	GO:0005576//extracellular region	GO:0016757//transferase activity, transferring glycosyl groups;GO:0016787//hydrolase activity	GO:0005975//carbohydrate metabolic process;GO:0009987//cellular process;GO:0071840//cellular component organization or biogenesis
MSTRG.44061	--	0	0.06	0	0.22	3.52	0.45	0	0	0	0	1.3967	0.02	-6.125843933	0.002258768	0.022314857	-4.321928095	0.982006263	0.999767122	-	-	-	-	-
MSTRG.44080	--	0.49	9.48	8.57	0.1	0.7	0.48	0.02	9.04	19.32	9.46	0.4267	6.18	3.856425529	0.000184395	0.002729506	0.614233345	0.420290249	0.984421386	probable serine/threonine-protein kinase At1g09600, partial [Brassica napus]	-	-	-	-
MSTRG.44327	SDH	0	0.14	0.17	0.04	0.47	0	0.62	1.23	0.45	0.7667	0.17	0.1033	-0.718229032	0.978448222	0.994935879	2.891293741	0.001111331	0.025659245	PREDICTED: sorbitol dehydrogenase [Raphanus sativus]	ko01100//Metabolic pathways;ko00040//Pentose and glucuronate interconversions;ko00051//Fructose and mannose metabolism	GO:0005911//cell-cell junction;GO:0031090//organelle membrane;GO:0044444//cytoplasmic part	GO:0046914//transition metal ion binding	GO:0044710//single-organism metabolic process
MSTRG.44479	--	0	0	0	0.1	12.11	2.27	0	0	0	0	4.8267	0	-12.23681148	0.000163804	0.002472065	0	1	1	BnaA01g25930D [Brassica napus]	-	-	-	-
MSTRG.44494	SN1	1.38	1.1	2.63	0.53	0.38	0.65	0.99	0.36	0.83	0.7267	0.52	1.7033	1.711777262	8.97E-07	2.56E-05	-1.228995156	0.258282971	0.854212256	peamaclein-like [Brassica napus]	-	GO:0030312//external encapsulating structure	-	GO:0006950//response to stress;GO:0010476//gibberellin mediated signaling pathway
MSTRG.44595	CPK32	0.53	0.58	0.99	1.27	1.47	0.95	0.02	0	0.13	0.05	1.23	0.7	-0.813231488	0.64031197	0.960992109	-3.807354922	0.002008014	0.040585905	PREDICTED: chloroplastic group IIA intron splicing facilitator CRS1, chloroplastic-like [Brassica oleracea var. oleracea] [Brassica oleracea]	-	GO:0009536//plastid	-	GO:0001101//response to acid chemical;GO:0003006//developmental process involved in reproduction;GO:0006090//pyruvate metabolic process;GO:0009658//chloroplast organization;GO:0009668//plastid membrane organization;GO:0016070//RNA metabolic process;GO:0016109//tetraterpenoid biosynthetic process;GO:0046471//phosphatidylglycerol metabolic process
MSTRG.44622	NAC079	0	0.17	0.03	0	0	0	1.91	0.92	4.59	2.4733	0	0.0667	6.058893689	0.186371256	0.56101472	5.213347282	2.25E-07	2.00E-05	PREDICTED: NAC domain-containing protein 100 [Brassica oleracea var. oleracea] [Brassica oleracea]	-	GO:0043231//intracellular membrane-bounded organelle	GO:0001071//nucleic acid binding transcription factor activity	GO:0010087//phloem or xylem histogenesis;GO:0010468//regulation of gene expression;GO:0034645//cellular macromolecule biosynthetic process;GO:0044707//single-multicellular organism process
MSTRG.44713	--	0	0	0	0.21	2.16	0.06	0	0	0	0	0.81	0	-9.661778098	0.000599759	0.007449302	0	1	1	hypothetical protein F2Q69_00040969 [Brassica cretica]	-	-	-	-
MSTRG.4473	SH3P3	2.21	0.9	0.72	19.09	4.2	7.44	0.69	0.39	0.26	0.4467	10.2433	1.2767	-3.00423147	0.000400093	0.005255881	-1.515111391	0.186143448	0.751092396	SH3 domain-containing protein 3 [Eutrema salsugineum]	ko00910//Nitrogen metabolism	GO:0009536//plastid	GO:0016836//hydro-lyase activity;GO:0046914//transition metal ion binding	GO:0044699//single-organism process
MSTRG.44772	PPC3	1.29	3.09	4.1	0.05	0.19	0.05	0.3	0.46	2.91	1.2233	0.0967	2.8267	4.869939459	3.71E-17	4.94E-15	-1.208284202	0.496981063	0.999767122	PREDICTED: phosphoenolpyruvate carboxylase 3 [Raphanus sativus]	ko01100//Metabolic pathways;ko01200//Carbon metabolism;ko00620//Pyruvate metabolism;ko00710//Carbon fixation in photosynthetic organisms	-	GO:0016491//oxidoreductase activity;GO:0016829//lyase activity	GO:0044237//cellular metabolic process;GO:0044710//single-organism metabolic process;GO:0071704//organic substance metabolic process
MSTRG.44790	--	3.98	8.96	3.62	16.74	198.9	48.29	0.34	0.14	0.56	0.3467	87.9767	5.52	-3.994380768	3.60E-05	0.000665999	-3.993047239	5.59E-05	0.002249719	PREDICTED: defensin-like protein 50 [Camelina sativa]	-	-	-	-
MSTRG.44838	RDR1	0.01	0.05	0	0.2	8.45	1.66	0	0	0	0	3.4367	0.02	-7.424866117	9.84E-07	2.79E-05	-4.321928095	0.560780945	0.999767122	RNA-dependent RNA polymerase 1-like [Brassica napus]	-	GO:0005623//cell	GO:0016779//nucleotidyltransferase activity;GO:0097159//organic cyclic compound binding;GO:1901363//heterocyclic compound binding	GO:0006605//protein targeting;GO:0006952//defense response;GO:0009058//biosynthetic process;GO:0009755//hormone-mediated signaling pathway;GO:0009863//salicylic acid mediated signaling pathway;GO:0010608//posttranscriptional regulation of gene expression;GO:0016458//gene silencing;GO:0031399//regulation of protein modification process;GO:0035556//intracellular signal transduction;GO:0042743//hydr…
MSTRG.44839	RDR1	0	0.14	0.01	0.32	7.11	1.69	0.01	0	0	0.0033	3.04	0.05	-5.925999419	0.00012947	0.002023684	-3.906890596	0.371257204	0.956294717	RNA-dependent RNA polymerase 1-like [Brassica napus]	-	-	GO:0016740//transferase activity;GO:0097159//organic cyclic compound binding	GO:0006952//defense response;GO:0007165//signal transduction;GO:0009058//biosynthetic process;GO:0009751//response to salicylic acid;GO:0010468//regulation of gene expression;GO:0031323//regulation of cellular metabolic process;GO:0044260//cellular macromolecule metabolic process;GO:0048519//negative regulation of biological process;GO:0048522//positive regulation of cellular process;GO:0051707//…
MSTRG.44852	RDR1	0.02	0.03	0.02	0.17	7	1.72	0	0	0	0	2.9633	0.0233	-6.988684687	1.41E-07	4.80E-06	-4.544320516	0.453845585	0.99860744	RNA-dependent RNA polymerase 1-like [Brassica napus]	-	GO:0005623//cell	GO:0016779//nucleotidyltransferase activity;GO:0097159//organic cyclic compound binding;GO:1901363//heterocyclic compound binding	GO:0006605//protein targeting;GO:0006952//defense response;GO:0009058//biosynthetic process;GO:0009755//hormone-mediated signaling pathway;GO:0009863//salicylic acid mediated signaling pathway;GO:0010608//posttranscriptional regulation of gene expression;GO:0016458//gene silencing;GO:0031399//regulation of protein modification process;GO:0035556//intracellular signal transduction;GO:0042743//hydr…
MSTRG.44856	RDR1	0	0	0	0	3.28	1.03	0	0	0	0	1.4367	0	-10.48850965	0.004284281	0.037476324	0	1	1	RNA-dependent RNA polymerase 1-like [Brassica napus]	-	GO:0005623//cell	GO:0016779//nucleotidyltransferase activity;GO:0097159//organic cyclic compound binding;GO:1901363//heterocyclic compound binding	GO:0006605//protein targeting;GO:0006952//defense response;GO:0009058//biosynthetic process;GO:0009755//hormone-mediated signaling pathway;GO:0009863//salicylic acid mediated signaling pathway;GO:0010608//posttranscriptional regulation of gene expression;GO:0016458//gene silencing;GO:0031399//regulation of protein modification process;GO:0035556//intracellular signal transduction;GO:0042743//hydr…
MSTRG.44857	RDR1	0	0.02	0	0.08	2.39	0.53	0	0	0	0	1	0.0067	-7.22881869	7.73E-05	0.001298454	-2.736965594	0.982006263	0.999767122	RNA-dependent RNA polymerase 1-like [Brassica napus]	-	GO:0043231//intracellular membrane-bounded organelle	GO:0034062//RNA polymerase activity;GO:0097159//organic cyclic compound binding;GO:1901363//heterocyclic compound binding	GO:0006605//protein targeting;GO:0006952//defense response;GO:0009058//biosynthetic process;GO:0009755//hormone-mediated signaling pathway;GO:0009863//salicylic acid mediated signaling pathway;GO:0010608//posttranscriptional regulation of gene expression;GO:0016458//gene silencing;GO:0031399//regulation of protein modification process;GO:0035556//intracellular signal transduction;GO:0042743//hydr…
MSTRG.45130	--	0	0.05	0.15	0.43	1.48	0.98	0.05	0.24	0	0.0967	0.9633	0.0667	-3.852997588	0.00310906	0.02903099	0.5360529	0.576215306	0.999767122	BnaC09g50590D [Brassica napus]	-	GO:0031984//organelle subcompartment;GO:0043231//intracellular membrane-bounded organelle	GO:0003824//catalytic activity	GO:0008152//metabolic process
MSTRG.45131	--	0.22	0.3	0.17	0.57	1.22	0.84	0.02	0	0.05	0.0233	0.8767	0.23	-1.930394533	0.003010774	0.028298153	-3.301169535	0.245729079	0.837022704	BnaC02g02700D [Brassica napus]	-	GO:0043231//intracellular membrane-bounded organelle	-	-
MSTRG.45384	--	1.47	1.01	0.91	0.42	0.3	0.29	3.72	3.93	1.79	3.1467	0.3367	1.13	1.74692998	1.24E-05	0.000262228	1.477501586	9.80E-05	0.003566839	hypothetical protein F2Q69_00018697 [Brassica cretica]	-	-	-	-
MSTRG.45463	CIA2	1.43	1.65	1.58	4.1	2.32	0.51	0.03	0.08	0	0.0367	2.31	1.5533	-0.572525397	0.93515615	0.988826639	-5.404754526	6.14E-06	0.00034859	zinc finger protein CONSTANS-LIKE 6 isoform X1 [Brassica rapa]	-	-	-	-
MSTRG.45506	RAB28	2.86	2.53	1.11	0.2	0.09	0.05	17.42	64.09	10.75	30.7533	0.1133	2.1667	4.256833067	2.05E-09	9.97E-08	3.827193669	2.88E-08	3.33E-06	PREDICTED: late embryogenesis abundant protein D-34-like [Brassica oleracea var. oleracea] [Brassica oleracea]	-	GO:0044444//cytoplasmic part	-	GO:0003006//developmental process involved in reproduction;GO:0006721//terpenoid metabolic process
MSTRG.45540	PAT18	0.13	1.37	0.83	0.18	0.03	0	0.45	0.49	0.88	0.6067	0.07	0.7767	3.471868722	0.001750303	0.018073204	-0.356391504	0.786560843	0.999767122	protein S-acyltransferase 18 [Capsella rubella]	-	-	-	GO:0008152//metabolic process;GO:0044763//single-organism cellular process
MSTRG.45620	At5g19315	0.09	0.2	0	1.29	27.33	3.59	0	0	0	0	10.7367	0.0967	-6.79531195	2.33E-05	0.000454355	-6.594946589	0.695663896	0.999767122	PREDICTED: defensin-like protein 24 [Raphanus sativus]	-	-	-	-
MSTRG.45664	--	0.5	0	0.43	4.19	3.26	3.38	0	0	0	0	3.61	0.31	-3.541658717	0.00011336	0.001814793	-8.276124405	0.409824198	0.976901281	hypothetical protein F2Q69_00018911 [Brassica cretica]	-	-	-	-
MSTRG.46021	At5g65490	0.05	0	0	0	0	0	9.94	8.36	0	6.1	0	0.0167	4.058893689	0.702992851	0.960992109	8.515699838	3.32E-05	0.001440947	PREDICTED: protein ecdysoneless homolog [Brassica oleracea var. oleracea] [Brassica oleracea]	-	GO:0009536//plastid	GO:0005488//binding;GO:0016740//transferase activity	GO:0006464//cellular protein modification process
MSTRG.4626	--	8.94	5.65	3.64	3.93	1.36	2.1	4.18	0.14	2.55	2.29	2.4633	6.0767	1.302668292	0.000505979	0.006427291	-1.407932557	0.370383974	0.955555624	hypothetical protein DY000_02061157 [Brassica cretica]	-	-	-	-
MSTRG.46356	OMT1	0.78	1.25	1.07	1.27	2.67	1.26	3.31	1.6	2.59	2.5	1.7333	1.0333	-0.746243408	0.922025161	0.987600447	1.27462238	3.15E-07	2.70E-05	Ribonuclease H domain [Arabidopsis suecica]	-	GO:0005911//cell-cell junction;GO:0016020//membrane;GO:0043231//intracellular membrane-bounded organelle;GO:0044444//cytoplasmic part	GO:0005515//protein binding;GO:0008171//O-methyltransferase activity;GO:0008757//S-adenosylmethionine-dependent methyltransferase activity	GO:0006575//cellular modified amino acid metabolic process;GO:0006595//polyamine metabolic process;GO:0006694//steroid biosynthetic process;GO:0006950//response to stress;GO:0009699//phenylpropanoid biosynthetic process;GO:0009891//positive regulation of biosynthetic process;GO:0051553//flavone biosynthetic process
MSTRG.46370	At2g21590	0.15	0.22	0	0.97	0.98	1.59	0.06	0.07	0.14	0.09	1.18	0.1233	-3.258152184	0.002624632	0.025276958	-0.454565863	0.956392212	0.999767122	BnaC02g44660D [Brassica napus]	ko01100//Metabolic pathways;ko01110//Biosynthesis of secondary metabolites;ko00500//Starch and sucrose metabolism;ko00520//Amino sugar and nucleotide sugar metabolism	GO:0009536//plastid	GO:0070566//adenylyltransferase activity	GO:0005982//starch metabolic process;GO:0043094//cellular metabolic compound salvage
MSTRG.46442	--	0.98	0.79	2.03	15.79	16.68	24.15	0.46	0.11	0.11	0.2267	18.8733	1.2667	-3.897240426	4.55E-14	4.19E-12	-2.482392767	0.076285137	0.489728328	Harbinger transposase-derived protein [Arabidopsis suecica]	-	-	-	-
MSTRG.46443	--	0.34	1.27	0.46	11.61	6.62	10.1	0	0	0.23	0.0767	9.4433	0.69	-3.774627929	3.66E-08	1.40E-06	-3.169925001	0.140315943	0.663867563	Harbinger transposase-derived protein [Arabidopsis suecica]	-	-	-	-
MSTRG.46606	--	3.23	2.82	2.91	0.61	0.62	0.39	3.22	4.96	3.79	3.99	0.54	2.9867	2.467504919	1.72E-18	2.68E-16	0.417852515	0.004668933	0.07704354	BnaA02g12610D [Brassica napus]	-	-	-	-
MSTRG.46633	--	0.82	0.66	0.44	0.28	0.13	0	0.08	0	0	0.0267	0.1367	0.64	2.227410496	0.004641188	0.039967774	-4.584962501	0.021009028	0.22179471	BnaCnng55650D [Brassica napus]	-	-	-	-
MSTRG.46742	--	0.34	0.65	0.36	0	0	0	0	0	0	0	0	0.45	8.813781191	0.000142088	0.002190235	-8.813781191	0.025244124	0.250699688	BnaCnng23990D [Brassica napus]	-	-	-	-
MSTRG.46788	TKPR2	1.19	2.51	0	0.15	0.03	0	1.48	0.05	0.15	0.56	0.06	1.2333	4.361456459	0.005762718	0.047490449	-1.139064038	0.733401858	0.999767122	Rossmann-fold superfamily protein [Perilla frutescens var. hirtella] [Perilla frutescens]	-	-	-	-
MSTRG.46794	--	0.26	0.08	0.33	1.51	0.64	1.98	0.19	0.23	0.03	0.15	1.3767	0.2233	-2.623908781	0.003735357	0.033587388	-0.574236094	0.964986484	0.999767122	Harbinger transposase-derived protein [Arabidopsis suecica]	-	-	-	-
MSTRG.46798	--	0	0	0	2.49	0	3.46	0	0	0	0	1.9833	0	-10.95371145	0.002653015	0.02547812	0	1	1	BnaA08g03160D [Brassica napus]	-	-	-	-
MSTRG.46817	--	1.62	1.9	2.02	4.48	3.71	5.31	0.41	0.26	0.82	0.4967	4.5	1.8467	-1.285001526	0.005577707	0.046287591	-1.894573646	0.011561203	0.14832249	PREDICTED: dnaJ protein ERDJ2A [Raphanus sativus]	-	-	-	-
MSTRG.46866	SFH3	0	0.17	0.06	0.56	3.17	0.63	0	0	0	0	1.4533	0.0767	-4.244622369	0.004077532	0.036053766	-6.26052755	0.615462822	0.999767122	PREDICTED: phosphatidylinositol/phosphatidylcholine transfer protein SFH3-like [Camelina sativa]	-	GO:0043231//intracellular membrane-bounded organelle	GO:0005548//phospholipid transporter activity	GO:0046165//alcohol biosynthetic process;GO:0051234//establishment of localization;GO:0090567//reproductive shoot system development
MSTRG.46967	SNL4	0.21	0.4	0.18	0	0.02	0	0.1	0.82	0.03	0.3167	0.0067	0.2633	5.303780748	0.000115821	0.001847331	0.26607486	0.458191283	0.999767122	paired amphipathic helix protein Sin3-like 4 [Eutrema salsugineum]	-	-	-	GO:0006355//regulation of transcription, DNA-templated
MSTRG.47055	--	2.9	6.92	0.09	0.12	0.08	0.21	2.3	0.18	1.27	1.25	0.1367	3.3033	4.595189243	3.59E-05	0.000664552	-1.401994462	0.523789122	0.999767122	-	-	-	-	-
MSTRG.47117	--	3.11	3.3	2.66	1.75	1.4	1.11	2.52	2.42	2.48	2.4733	1.42	3.0233	1.09024912	8.93E-09	3.86E-07	-0.289683364	0.37038698	0.955555624	Reverse transcriptase domain [Arabidopsis suecica]	-	-	-	-
MSTRG.47183	--	1.91	0.95	1.1	8.14	93.62	28.74	0	0.73	0.38	0.37	43.5	1.32	-5.042405566	4.32E-08	1.63E-06	-1.834940754	0.313126249	0.910292448	BnaA02g28970D [Brassica napus]	-	-	-	-
MSTRG.47211	AIL1	0.7	0.26	0.41	0.17	0	0.06	1.24	0.88	1.68	1.2667	0.0767	0.4567	2.574470127	0.001672643	0.017455834	1.471823525	0.000288222	0.008668885	PREDICTED: AP2-like ethylene-responsive transcription factor AIL1 [Brassica oleracea var. oleracea] [Brassica oleracea]	-	GO:0043231//intracellular membrane-bounded organelle	GO:0001071//nucleic acid binding transcription factor activity	GO:0010468//regulation of gene expression;GO:0034645//cellular macromolecule biosynthetic process;GO:0044699//single-organism process
MSTRG.47278	MYB54	0	0.11	0.04	0	0.03	0	0.95	1.41	0.99	1.1167	0.01	0.05	2.321928095	0.301257182	0.726479473	4.48112669	2.31E-07	2.04E-05	PREDICTED: transcription factor WER-like [Brassica oleracea var. oleracea] [Brassica oleracea]	ko04626//Plant-pathogen interaction	GO:0043231//intracellular membrane-bounded organelle	GO:0000975//regulatory region DNA binding;GO:0001071//nucleic acid binding transcription factor activity	GO:0001101//response to acid chemical;GO:0009834//plant-type secondary cell wall biogenesis;GO:0010468//regulation of gene expression
MSTRG.47390	NRT2.5	1.03	0.86	0.58	0.16	0.48	0.11	0.51	0.2	0.26	0.3233	0.25	0.8233	1.719548541	0.001531563	0.0162408	-1.348454389	0.286557997	0.882983655	PREDICTED: high affinity nitrate transporter 2.5 [Raphanus sativus]	-	-	-	-
MSTRG.47505	MAM3	0	0	0	1.68	0.3	1.26	0	0	0	0	1.08	0	-10.0768156	0.003194427	0.029657088	0	1	1	BnaA02g36350D [Brassica napus]	ko01110//Biosynthesis of secondary metabolites;ko01210//2-Oxocarboxylic acid metabolism;ko00966//Glucosinolate biosynthesis	GO:0009526//plastid envelope	GO:0046912//transferase activity, transferring acyl groups, acyl groups converted into alkyl on transfer	GO:0000097//sulfur amino acid biosynthetic process;GO:0006551//leucine metabolic process;GO:0006950//response to stress;GO:0009683//indoleacetic acid metabolic process;GO:0019758//glycosinolate biosynthetic process;GO:0051707//response to other organism
MSTRG.47613	--	3.81	1.41	0.37	0.65	0.25	0.2	7.03	0.12	0.08	2.41	0.3667	1.8633	2.345344759	0.00076904	0.009097122	0.371147364	0.57145947	0.999767122	dentin matrix acidic phosphoprotein 1-like [Brassica napus]	-	-	-	-
MSTRG.47723	--	0.98	0.47	0.35	0	0	0.01	0	0	0.12	0.04	0.0033	0.6	7.491853096	0.005355073	0.044826584	-3.906890596	0.188738921	0.755419508	BnaC07g15840D [Brassica napus]	-	-	-	-
MSTRG.47732	GH3.10	0.99	1.18	0.77	3.68	11.07	3.23	0.11	0.16	0.62	0.2967	5.9933	0.98	-2.612504961	0.000278781	0.003873621	-1.723938914	0.141398936	0.666458777	indole-3-acetic acid-amido synthetase GH3.10-like [Brassica napus]	ko04075//Plant hormone signal transduction	-	-	GO:0001101//response to acid chemical;GO:0006952//defense response;GO:0006970//response to osmotic stress
MSTRG.47826	--	0.84	0.8	1.36	4.34	3.05	4.1	0	0	0.18	0.06	3.83	1	-1.937344392	0.001994871	0.020133743	-4.058893689	0.010697333	0.140526952	BnaC09g43340D [Brassica napus]	-	-	-	-
MSTRG.47909	--	0.84	0.53	0.12	0.1	0.04	0.11	0.13	0	0	0.0433	0.0833	0.4967	2.575312331	0.002496716	0.024251162	-3.518728802	0.080303705	0.502858472	PREDICTED: transcription initiation factor IIE subunit beta-like [Raphanus sativus]	ko03022//Basal transcription factors	GO:0044451//nucleoplasm part	-	GO:0006352//DNA-templated transcription, initiation;GO:0006412//translation
MSTRG.47919	--	1.15	2	2.68	0	0	0	1.05	0.62	4.14	1.9367	0	1.9433	10.92431767	5.50E-10	2.92E-08	-0.00495772	0.620799421	0.999767122	Helitron helicase-like domain [Arabidopsis suecica]	-	-	-	-
MSTRG.48019	--	50.72	39.81	31.86	30.53	31.55	16.22	76.67	162.59	41.21	93.49	26.1	40.7967	0.644401473	8.37E-05	0.001390289	1.196360778	0.002295079	0.044841046	hypothetical protein F2Q68_00001654 [Brassica cretica]	-	-	-	-
MSTRG.48180	--	10.85	8.58	18.98	42.78	33.53	49.87	2.49	2.71	4.81	3.3367	42.06	12.8033	-1.715929387	0.001647472	0.017233356	-1.94003999	0.006903772	0.102404698	BnaC09g43340D [Brassica napus]	-	-	-	-
MSTRG.48219	--	2.31	2.62	2.9	0.31	0.59	0.97	5.18	6.46	9.88	7.1733	0.6233	2.61	2.065974037	2.03E-09	9.87E-08	1.458593865	5.57E-08	6.02E-06	DEK C-terminal [Arabidopsis suecica]	-	GO:0044424//intracellular part	-	GO:0009409//response to cold
MSTRG.4832	DHS	0.86	1.42	0.56	0.1	0.4	0.04	0.33	1.85	0.1	0.76	0.18	0.9467	2.394859617	0.000982908	0.011190855	-0.316857105	0.748213437	0.999767122	deoxyhypusine synthase-like isoform X2 [Brassica rapa]	-	-	GO:0016765//transferase activity, transferring alkyl or aryl (other than methyl) groups	GO:0018205//peptidyl-lysine modification;GO:0042398//cellular modified amino acid biosynthetic process;GO:0048229//gametophyte development
MSTRG.48341	LCR53	0.14	0.69	0.31	1.36	10.33	3.1	0	0.1	0.2	0.1	4.93	0.38	-3.697516323	0.001406632	0.01511023	-1.925999419	0.385002285	0.963144388	BnaCnng13530D [Brassica napus]	-	-	-	GO:0050896//response to stimulus;GO:0051704//multi-organism process
MSTRG.48395	GRF2	11.7	15.72	12.83	14.97	17.48	12.57	5.65	4.88	5.16	5.23	15.0067	13.4167	-0.161577274	0.013172702	0.090914429	-1.359143431	0.000461369	0.012779298	protein tesmin/TSO1-like CXC 7 isoform X2 [Brassica napus]	-	GO:0012505//endomembrane system;GO:0031090//organelle membrane;GO:0043231//intracellular membrane-bounded organelle;GO:0044444//cytoplasmic part	GO:0016817//hydrolase activity, acting on acid anhydrides;GO:0051219//phosphoprotein binding	GO:0001101//response to acid chemical;GO:0003006//developmental process involved in reproduction;GO:0009887//organ morphogenesis;GO:0010468//regulation of gene expression;GO:0034645//cellular macromolecule biosynthetic process;GO:0043401//steroid hormone mediated signaling pathway;GO:0048827//phyllome development
MSTRG.48459	--	2.16	1.62	5.1	0.98	0.81	1.77	1.57	0.44	3.63	1.88	1.1867	2.96	1.318682435	0.000949745	0.010862759	-0.654864514	0.921437157	0.999767122	BnaC06g41530D [Brassica napus]	ko03420//Nucleotide excision repair;ko03440//Homologous recombination;ko03030//DNA replication;ko03430//Mismatch repair	-	-	-
MSTRG.48502	--	2.23	2.92	1.46	6.79	9.84	9.44	0.55	0.41	0.6	0.52	8.69	2.2033	-1.979668406	0.000117769	0.001871024	-2.083104243	0.016150274	0.18621043	hypothetical protein F2Q69_00012909 [Brassica cretica]	-	-	-	-
MSTRG.48546	CYP72A15	18.27	21.76	16.28	40.48	48.72	26.2	5.31	6.4	8.02	6.5767	38.4667	18.77	-1.035180168	0.122588971	0.439196179	-1.513000195	0.001499211	0.0323323	PREDICTED: cytochrome P450 72A15-like [Brassica oleracea var. oleracea] [Brassica oleracea]	-	GO:0031224//intrinsic component of membrane;GO:0043231//intracellular membrane-bounded organelle	GO:0016491//oxidoreductase activity;GO:0046906//tetrapyrrole binding;GO:0046914//transition metal ion binding	GO:0030001//metal ion transport;GO:0044710//single-organism metabolic process
MSTRG.48616	PIF6	22.82	13.35	20.92	7.91	7.59	7.66	15.18	9.28	13.28	12.58	7.72	19.03	1.301602809	1.34E-14	1.32E-12	-0.597143639	0.947208137	0.999767122	transcription factor PIF6 isoform X3 [Brassica rapa]	-	GO:0043231//intracellular membrane-bounded organelle	GO:0001071//nucleic acid binding transcription factor activity;GO:0005515//protein binding	GO:0007165//signal transduction;GO:0009628//response to abiotic stimulus;GO:0010087//phloem or xylem histogenesis;GO:0010467//gene expression;GO:0019222//regulation of metabolic process;GO:0034645//cellular macromolecule biosynthetic process
MSTRG.48731	ddx11	0.73	0.06	0	0.02	0.01	0	2.84	5.48	0	2.7733	0.01	0.2633	4.718818247	0.00509349	0.043026824	3.39665897	0.163680793	0.713209999	PREDICTED: probable ATP-dependent RNA helicase DDX11 [Brassica oleracea var. oleracea] [Brassica oleracea]	-	GO:0043231//intracellular membrane-bounded organelle	GO:0003678//DNA helicase activity;GO:0032550//purine ribonucleoside binding	GO:0000723//telomere maintenance;GO:0006260//DNA replication;GO:0010212//response to ionizing radiation;GO:0032844//regulation of homeostatic process;GO:0033043//regulation of organelle organization;GO:0070192//chromosome organization involved in meiotic cell cycle
MSTRG.48763	--	0.66	1.2	1.01	0.18	0.61	0.62	0.48	0.82	0.78	0.6933	0.47	0.9567	1.025355574	0.003685277	0.033224965	-0.464467209	0.769445466	0.999767122	BnaAnng14890D [Brassica napus]	-	-	-	-
MSTRG.4884	OlnB1	2.79	3.89	7.43	0.07	0.35	0.05	0.52	1.32	2.15	1.33	0.1567	4.7033	4.907913421	4.70E-12	3.37E-10	-1.822257336	0.086572893	0.524371393	oleosin-B1 [Brassica rapa]	-	GO:0005811//lipid particle;GO:0031224//intrinsic component of membrane;GO:0043231//intracellular membrane-bounded organelle;GO:0044420//extracellular matrix component	GO:0005488//binding	GO:0000003//reproduction;GO:0000904//cell morphogenesis involved in differentiation;GO:0006833//water transport;GO:0008037//cell recognition;GO:0009664//plant-type cell wall organization;GO:0022414//reproductive process;GO:0051235//maintenance of location
MSTRG.48866	--	2.57	1.96	3.32	12.49	12.14	12.44	3.58	1.91	2.9	2.7967	12.3567	2.6167	-2.239487556	3.09E-13	2.54E-11	0.095978157	0.078347826	0.496357312	tetratricopeptide repeat protein 38-like isoform X1 [Brassica napus]	-	-	-	-
MSTRG.48886	SNL3	0	0	0	0.33	2.05	1.54	0	0	0	0	1.3067	0	-10.35167544	0.00058717	0.007317357	0	1	1	PREDICTED: paired amphipathic helix protein Sin3-like 3 [Raphanus sativus]	-	GO:0043231//intracellular membrane-bounded organelle	-	GO:0001101//response to acid chemical;GO:0006355//regulation of transcription, DNA-templated
MSTRG.48917	JAL35	0.02	0.1	0	0.56	0.57	0.37	0	0.03	0.03	0.02	0.5	0.04	-3.64385619	0.00265562	0.025500255	-1	0.883926246	0.999767122	PREDICTED: jacalin-related lectin 35 [Brassica oleracea var. oleracea] [Brassica oleracea]	-	GO:0005911//cell-cell junction;GO:0009536//plastid	GO:0005488//binding	GO:0000097//sulfur amino acid biosynthetic process;GO:0001101//response to acid chemical;GO:0006970//response to osmotic stress;GO:0006996//organelle organization;GO:0009791//post-embryonic development;GO:0019759//glycosinolate catabolic process;GO:0044271//cellular nitrogen compound biosynthetic process;GO:0044702//single organism reproductive process;GO:0048608//reproductive structure developme…
MSTRG.48949	CHR17	1.12	0.91	0.76	3.36	2.81	2.2	0.25	0.15	0.49	0.2967	2.79	0.93	-1.584962501	0.00062004	0.007650887	-1.648387881	0.0498789	0.382578724	ISWI chromatin-remodeling complex ATPase CHR17-like [Brassica napus]	-	GO:0031010//ISWI-type complex;GO:0044444//cytoplasmic part	GO:0003676//nucleic acid binding;GO:0003682//chromatin binding;GO:0032550//purine ribonucleoside binding;GO:0042623//ATPase activity, coupled	GO:0000280//nuclear division;GO:0003006//developmental process involved in reproduction;GO:0006260//DNA replication;GO:0006305//DNA alkylation;GO:0006338//chromatin remodeling;GO:0006342//chromatin silencing;GO:0007017//microtubule-based process;GO:0009606//tropism;GO:0033043//regulation of organelle organization;GO:0034968//histone lysine methylation;GO:0035194//posttranscriptional gene silencin…
MSTRG.48951	--	3.77	7.58	7.03	19.44	90.04	33.01	0.46	2.52	4.44	2.4733	47.4967	6.1267	-2.954652002	5.70E-05	0.000996607	-1.308645675	0.393800894	0.968084948	unnamed protein product [Brassica napus]	-	-	-	-
MSTRG.48957	RPP1	0.45	0.36	0.46	0.24	0.16	0.23	0.24	0.18	0.2	0.2067	0.21	0.4233	1.011404763	0.000102886	0.001668572	-1.034488376	0.392359676	0.967927704	BnaCnng76010D, partial [Brassica napus]	-	GO:0043231//intracellular membrane-bounded organelle	-	GO:0006950//response to stress;GO:0009617//response to bacterium
MSTRG.49003	At4g15970	0	0.2	0	2.77	3.4	11.73	0	0	0	0	5.9667	0.0667	-6.483815777	6.54E-07	1.94E-05	-6.058893689	0.514984534	0.999767122	Nucleotide-diphospho-sugar transferase [Arabidopsis thaliana x Arabidopsis arenosa]	-	GO:0044424//intracellular part	-	-
MSTRG.49029	--	5.11	5.64	6.26	8.95	23.8	17.44	0.46	0.31	0.71	0.4933	16.73	5.67	-1.561016805	0.008147985	0.062770733	-3.52271406	8.40E-17	7.36E-14	BnaA07g03900D [Brassica napus]	-	-	-	-
MSTRG.49221	TT10	219.33	220.72	300.66	408.26	237.06	386	89.22	28.44	70.5	62.72	343.7733	246.9033	-0.477511325	0.615096376	0.9516788	-1.976948849	0.001757698	0.036523708	PREDICTED: laccase-15 [Brassica oleracea var. oleracea] [Brassica oleracea]	-	GO:0005576//extracellular region	GO:0016491//oxidoreductase activity	GO:0009699//phenylpropanoid biosynthetic process;GO:0009808//lignin metabolic process
MSTRG.49222	TT10	9.31	9.11	9.29	7.32	18.66	13.62	2.46	0.63	1.36	1.4833	13.2	9.2367	-0.515093719	0.083281141	0.341767175	-2.63852947	0.000350108	0.010196953	PREDICTED: laccase-15 [Brassica oleracea var. oleracea] [Brassica oleracea]	-	-	-	GO:0009698//phenylpropanoid metabolic process
MSTRG.49288	--	0.68	0.37	0.28	1.74	29.4	9.34	0	0	0	0	13.4933	0.4433	-4.927711139	2.01E-05	0.000400225	-8.79224803	0.076423309	0.490499347	BnaAnng06900D [Brassica napus]	-	-	-	-
MSTRG.49357	OVA2	1.66	1.53	1.08	3.69	4.44	3.19	1.06	0.64	1.02	0.9067	3.7733	1.4233	-1.406565983	0.001819602	0.018641539	-0.650629418	0.838946393	0.999767122	PREDICTED: isoleucine--tRNA ligase, chloroplastic/mitochondrial-like [Brassica oleracea var. oleracea] [Brassica oleracea]	ko00970//Aminoacyl-tRNA biosynthesis	GO:0009532//plastid stroma	GO:0004812//aminoacyl-tRNA ligase activity;GO:0032550//purine ribonucleoside binding;GO:0052689//carboxylic ester hydrolase activity	GO:0003006//developmental process involved in reproduction;GO:0006418//tRNA aminoacylation for protein translation;GO:0006448//regulation of translational elongation;GO:0009668//plastid membrane organization;GO:0016109//tetraterpenoid biosynthetic process
MSTRG.4939	VQ31	0.93	0.56	0.22	0.05	0.04	0.11	0.36	0.11	0.45	0.3067	0.0667	0.57	3.09592442	0.00043387	0.005631695	-0.894290559	0.718689571	0.999767122	BnaAnng06050D [Brassica napus]	-	-	-	-
MSTRG.49916	MVP1	76.87	66.38	64.3	209.99	112.28	122.49	19.09	12.89	16.85	16.2767	148.2533	69.1833	-1.099568112	0.107937656	0.404384311	-2.087619249	5.23E-12	1.63E-09	PREDICTED: inactive GDSL esterase/lipase-like protein 25 [Brassica oleracea var. oleracea] [Brassica oleracea]	-	GO:0005576//extracellular region;GO:0005774//vacuolar membrane;GO:0005840//ribosome;GO:0005911//cell-cell junction;GO:0009526//plastid envelope;GO:0042579//microbody	GO:0016788//hydrolase activity, acting on ester bonds	GO:0006796//phosphate-containing compound metabolic process;GO:0006886//intracellular protein transport;GO:0006950//response to stress;GO:0006996//organelle organization;GO:0009617//response to bacterium;GO:0019637//organophosphate metabolic process;GO:0019759//glycosinolate catabolic process;GO:0044238//primary metabolic process;GO:0044249//cellular biosynthetic process;GO:0044711//single-organi…
MSTRG.49919	--	3.36	5.04	2.62	26.27	22.22	23.37	1.81	1.26	1.8	1.6233	23.9533	3.6733	-2.705064711	8.32E-16	9.43E-14	-1.178130546	0.131086577	0.644631188	BnaCnng70510D [Brassica napus]	-	-	-	-
MSTRG.49940	ASP4	0.33	0.42	0.46	2	0.84	1.5	0	0	0.03	0.01	1.4467	0.4033	-1.842687995	0.05738241	0.266049136	-5.333900737	0.002179192	0.043104276	PREDICTED: aspartate aminotransferase, cytoplasmic isozyme 2-like [Brassica oleracea var. oleracea] [Brassica oleracea]	ko01100//Metabolic pathways;ko01110//Biosynthesis of secondary metabolites;ko01200//Carbon metabolism;ko01230//Biosynthesis of amino acids;ko00270//Cysteine and methionine metabolism;ko01210//2-Oxocarboxylic acid metabolism;ko00710//Carbon fixation in photosynthetic organisms;ko00330//Arginine and proline metabolism;ko00250//Alanine, aspartate and glutamate metabolism;ko00400//Phenylalanine, tyro…	GO:0005911//cell-cell junction;GO:0009536//plastid;GO:0030312//external encapsulating structure;GO:0031090//organelle membrane;GO:0042579//microbody	GO:0043168//anion binding;GO:0046914//transition metal ion binding;GO:0070546//L-phenylalanine aminotransferase activity	GO:0006511//ubiquitin-dependent protein catabolic process;GO:0009062//fatty acid catabolic process;GO:0009404//toxin metabolic process;GO:0009692//ethylene metabolic process;GO:0009725//response to hormone;GO:0010260//organ senescence;GO:0035966//response to topologically incorrect protein;GO:0043248//proteasome assembly;GO:0048588//developmental cell growth
MSTRG.49978	ECP63	4.27	3.81	3.66	1.29	1.46	0.5	5.7	14.97	6.51	9.06	1.0833	3.9133	1.852920785	3.40E-09	1.59E-07	1.211113048	0.000457096	0.012694673	PREDICTED: LOW QUALITY PROTEIN: embryonic protein DC-8 [Brassica oleracea var. oleracea] [Brassica oleracea]	-	GO:0044444//cytoplasmic part	-	GO:0003006//developmental process involved in reproduction
MSTRG.50005	At1g50280	1	0.38	1.35	1.76	0.31	1.44	0.03	0.09	0.09	0.07	1.17	0.91	-0.362570079	0.732442763	0.971162055	-3.700439718	0.000946518	0.022703612	BTB/POZ domain-containing protein At1g50280-like [Brassica napus]	-	-	-	-
MSTRG.50160	--	0.54	0.46	1.77	4.18	3.21	13.58	0.72	0	1.68	0.8	6.99	0.9233	-2.92036898	0.002847247	0.027004677	-0.20685157	0.801532246	0.999767122	BnaC09g11400D [Brassica napus]	-	-	-	-
MSTRG.50304	PCMP-H57	7.53	1.62	9.48	0.69	0	0.12	16.27	18.23	10.57	15.0233	0.27	6.21	4.523561956	8.68E-06	0.000192221	1.274539776	0.009358546	0.127271847	LOW QUALITY PROTEIN: pentatricopeptide repeat-containing protein At3g14330 [Arabidopsis lyrata subsp. lyrata] [Arabidopsis lyrata]	-	-	-	GO:0009451//RNA modification
MSTRG.50370	At3g22650	0	0.06	0.03	0.08	1.8	0.92	0	0	0	0	0.9333	0.03	-4.959358016	0.00280329	0.026671117	-4.906890596	0.691908099	0.999767122	PREDICTED: F-box protein At3g08750-like [Raphanus sativus]	-	GO:0042995//cell projection	-	GO:0009653//anatomical structure morphogenesis;GO:0009725//response to hormone;GO:0009791//post-embryonic development;GO:0009987//cellular process;GO:0016043//cellular component organization
MSTRG.50497	OlnB1	1.28	1.02	6.03	6.72	6.26	11.84	0	0	0.16	0.0533	8.2733	2.7767	-1.575114715	0.185195327	0.558860981	-5.702172685	0.000354977	0.010318778	oleosin-B1 isoform X2 [Brassica rapa]	-	GO:0005811//lipid particle;GO:0031224//intrinsic component of membrane;GO:0043231//intracellular membrane-bounded organelle	GO:0005488//binding	GO:0000003//reproduction;GO:0000904//cell morphogenesis involved in differentiation;GO:0009664//plant-type cell wall organization;GO:0051235//maintenance of location
MSTRG.50625	--	0.06	0.13	0.13	0.23	6.22	1.03	0.06	0.08	0.17	0.1033	2.4933	0.1067	-4.54689446	0.002886391	0.027324098	-0.04580369	0.712162241	0.999767122	myb-like protein X [Brassica napus]	-	GO:0043231//intracellular membrane-bounded organelle	-	GO:0000904//cell morphogenesis involved in differentiation;GO:0003006//developmental process involved in reproduction;GO:0009664//plant-type cell wall organization
MSTRG.5123	GH3.15	0.98	0.87	1.01	1.39	1.39	1.17	0.11	0.04	0.23	0.1267	1.3167	0.9533	-0.465837506	0.503000532	0.899870714	-2.911943823	0.000316432	0.009366897	indole-3-acetic acid-amido synthetase GH3.17-like [Brassica napus]	ko04075//Plant hormone signal transduction	GO:0043231//intracellular membrane-bounded organelle	GO:0016881//acid-amino acid ligase activity	GO:0009725//response to hormone;GO:0016129//phytosteroid biosynthetic process;GO:0048878//chemical homeostasis
MSTRG.51869	FEY	0.14	0.13	0.13	4.67	3.63	9.8	0	0	0	0	6.0333	0.1333	-5.499845887	2.80E-17	3.79E-15	-7.058893689	0.030603957	0.282370572	PREDICTED: retinol dehydrogenase 11-like [Brassica oleracea var. oleracea] [Brassica oleracea]	-	-	GO:0016628//oxidoreductase activity, acting on the CH-CH group of donors, NAD or NADP as acceptor	GO:0044710//single-organism metabolic process
MSTRG.52048	--	1.04	2	1.02	8.53	8.04	2.79	0.76	0	0.15	0.3033	6.4533	1.3533	-2.25352732	0.001691088	0.017605093	-2.157541277	0.187143304	0.752764531	hypothetical protein F2Q69_00054143 [Brassica cretica]	-	-	-	-
MSTRG.52080	--	2.41	0.93	1.17	5.44	3.12	3.96	0.11	0.04	0.31	0.1533	4.1733	1.5033	-1.473035224	0.083799051	0.343004457	-3.293421667	0.002341999	0.045474097	zinc finger BED domain-containing protein RICESLEEPER 2-like [Brassica napus]	-	-	-	-
MSTRG.52187	BIP2	6.64	9.67	7.27	20.37	22.1	19.03	3.68	2.06	5.32	3.6867	20.5	7.86	-1.383022692	1.04E-05	0.000224067	-1.092212333	0.215027214	0.795535238	mediator of RNA polymerase II transcription subunit 37f [Brassica rapa]	ko04141//Protein processing in endoplasmic reticulum;ko03060//Protein export	GO:0005911//cell-cell junction;GO:0009536//plastid;GO:0030312//external encapsulating structure;GO:0031090//organelle membrane;GO:0043232//intracellular non-membrane-bounded organelle;GO:0043234//protein complex;GO:0044432//endoplasmic reticulum part	GO:0016628//oxidoreductase activity, acting on the CH-CH group of donors, NAD or NADP as acceptor;GO:0032550//purine ribonucleoside binding	GO:0000741//karyogamy;GO:0009725//response to hormone;GO:0010038//response to metal ion;GO:0010468//regulation of gene expression;GO:0022613//ribonucleoprotein complex biogenesis;GO:0033554//cellular response to stress;GO:0034645//cellular macromolecule biosynthetic process;GO:0043161//proteasome-mediated ubiquitin-dependent protein catabolic process;GO:0044710//single-organism metabolic process
MSTRG.52273	PRA1B3	0.34	0.97	1.04	0	0.19	0.31	0.07	1.4	2.13	1.2	0.1667	0.7833	2.232660757	0.004928474	0.041949786	0.61533615	0.258716456	0.854247896	Calycin [Arabidopsis suecica]	-	GO:0031090//organelle membrane;GO:0031224//intrinsic component of membrane;GO:0043231//intracellular membrane-bounded organelle	-	GO:0006810//transport
MSTRG.52522	--	0	0	0	0.19	3.51	0.34	0	0	0	0	1.3467	0	-10.39517708	0.003010931	0.028298153	0	1	1	BnaA08g03530D [Brassica napus]	-	-	-	-
MSTRG.52799	PCMP-H29	5.12	0.87	2.39	0	0	0	10.46	8.26	10.57	9.7633	0	2.7933	11.44777203	5.31E-15	5.49E-13	1.805386044	8.74E-05	0.003239244	PREDICTED: pentatricopeptide repeat-containing protein At2g41080 [Raphanus sativus]	-	GO:0043231//intracellular membrane-bounded organelle	-	-
MSTRG.52914	--	0.53	0.47	0.28	2.75	18	6.31	0	0	0	0	9.02	0.4267	-4.401946124	9.07E-06	0.000199285	-8.736965594	0.082989397	0.512190103	BnaC03g24080D [Brassica napus]	-	-	-	-
MSTRG.52926	--	0	0	0	1.19	0.63	0.93	0	0	0	0	0.9167	0	-9.840253403	0.002125836	0.021213676	0	1	1	PREDICTED: chaperone protein ClpB3, chloroplastic-like [Brassica oleracea var. oleracea] [Brassica oleracea]	-	-	-	-
MSTRG.5294	--	0.22	0.87	0.08	2.29	47.11	20.44	0	0	0	0	23.28	0.39	-5.899473124	1.62E-06	4.36E-05	-8.607330314	0.120259073	0.620644011	PREDICTED: defensin-like protein 24 [Raphanus sativus]	-	-	-	-
MSTRG.52953	--	28.35	22.33	25.68	6.53	7.57	6.28	39.16	56.01	41.93	45.7	6.7933	25.4533	1.905663051	2.89E-43	3.46E-40	0.844339563	2.48E-06	0.00015961	hypothetical protein F2Q69_00002232 [Brassica cretica]	-	-	-	-
MSTRG.52998	ESFL10	0	0	0	0.67	2.13	0.81	0	0	0	0	1.2033	0	-10.23282062	0.002427397	0.023702477	0	1	1	pollen coat protein B8 [Brassica oleracea]	-	-	-	-
MSTRG.53003	ZPR1	3.26	1.99	3.83	5.1	3.23	2.08	0.11	0	0.55	0.22	3.47	3.0267	-0.197205866	0.350822093	0.781473479	-3.782154368	0.0018648	0.038328646	protein LITTLE ZIPPER 1-like [Brassica napus]	-	-	GO:0005488//binding	-
MSTRG.53060	ARF11	0.33	0.23	0.23	1.25	0.89	2.21	0.37	0.21	0	0.1933	1.45	0.2633	-2.461090843	0.000723645	0.008659358	-0.445799753	0.915626241	0.999767122	PREDICTED: auxin response factor 11-like isoform X1 [Brassica oleracea var. oleracea] [Brassica oleracea]	-	GO:0005911//cell-cell junction;GO:0043231//intracellular membrane-bounded organelle	GO:0001071//nucleic acid binding transcription factor activity;GO:0005515//protein binding	GO:0009755//hormone-mediated signaling pathway;GO:0010468//regulation of gene expression;GO:0034645//cellular macromolecule biosynthetic process
MSTRG.53064	ESFL10	0.68	1.19	0.25	13.59	129.41	22.62	0	0	0	0	55.2067	0.7067	-6.287668826	1.55E-09	7.68E-08	-9.464886049	0.046638212	0.367269715	pollen coat protein B13 [Brassica oleracea]	-	-	-	-
MSTRG.53065	--	1.12	0.68	0.78	12.27	79.05	18.3	0	0	0	0	36.54	0.86	-5.408996164	8.29E-09	3.61E-07	-9.74819285	0.056360989	0.412276722	pollen coat protein B13 [Brassica oleracea]	-	-	-	-
MSTRG.53082	--	5.39	4.96	5.71	14.08	11.63	15.6	2.42	2.58	2	2.3333	13.77	5.3533	-1.363019167	0.000190807	0.002810215	-1.198045066	0.046547777	0.366841352	hypothetical protein HID58_090238 [Brassica napus]	-	-	-	-
MSTRG.53167	OTU11	0.24	0.51	0.31	3.15	2.42	3.03	0.05	0.06	0.2	0.1033	2.8667	0.3533	-3.020272395	5.07E-07	1.54E-05	-1.773724144	0.312682784	0.90982513	OTU domain [Arabidopsis thaliana x Arabidopsis arenosa]	-	GO:0009536//plastid;GO:0016020//membrane	GO:0070011//peptidase activity, acting on L-amino acid peptides	GO:0019538//protein metabolic process
MSTRG.53245	At2g21465	1.06	1.51	0.57	16.47	29.4	14.41	0	0	0.12	0.04	20.0933	1.0467	-4.262842953	1.67E-13	1.42E-11	-4.709658248	0.011014402	0.143454972	PREDICTED: defensin-like protein 290 [Brassica oleracea var. oleracea] [Brassica oleracea]	-	-	-	-
MSTRG.53269	Klhdc4	6.93	6.31	5.51	13.4	12.76	12.48	6.29	5.35	4.63	5.4233	12.88	6.25	-1.043204499	0.002924332	0.027630936	-0.204676345	0.117922752	0.615019941	PREDICTED: kelch domain-containing protein 4 [Brassica oleracea var. oleracea] [Brassica oleracea]	-	-	-	GO:0044765//single-organism transport
MSTRG.53439	--	1.38	1.56	1.27	0.29	0.59	0.87	0.6	1.18	0.83	0.87	0.5833	1.4033	1.266465311	0.001714835	0.017784252	-0.689770426	0.942738996	0.999767122	F28J9.9 [Arabidopsis thaliana]	-	-	-	-
MSTRG.53481	BDG3	1.14	0.92	0.52	0.59	1.06	0.34	9.04	2.23	5.13	5.4667	0.6633	0.86	0.374602635	0.097665481	0.378999508	2.668252844	1.55E-07	1.42E-05	probable lysophospholipase BODYGUARD 3 [Brassica napus]	-	GO:0005618//cell wall	GO:0003824//catalytic activity	GO:0006950//response to stress;GO:0009059//macromolecule biosynthetic process;GO:0010565//regulation of cellular ketone metabolic process
MSTRG.53500	--	0.05	0.39	0.33	1.12	1.56	1.58	0.03	0.1	0.07	0.0667	1.42	0.2567	-2.46792308	0.005245979	0.044087077	-1.944858446	0.294968063	0.892223059	hypothetical protein HID58_023083 [Brassica napus]	-	-	-	-
MSTRG.53617	XTH9	11.91	11.39	7.95	13.28	3.31	10.05	0.93	0.35	0.52	0.6	8.88	10.4167	0.230262107	0.09133629	0.362991596	-4.117787378	2.43E-14	1.32E-11	PREDICTED: xyloglucan endotransglucosylase/hydrolase protein 9 [Brassica oleracea var. oleracea] [Brassica oleracea]	-	GO:0005576//extracellular region;GO:0030312//external encapsulating structure	GO:0016758//transferase activity, transferring hexosyl groups;GO:0016787//hydrolase activity	GO:0044042//glucan metabolic process;GO:0045229//external encapsulating structure organization;GO:0048509//regulation of meristem development
MSTRG.53620	CYP708A2	0.03	0.1	0.09	0.24	9.7	2.03	0	0	0	0	3.99	0.0733	-5.765775818	7.79E-05	0.001305808	-6.196397213	0.31026496	0.906782134	cytochrome P450 708A2-like [Brassica napus]	-	GO:0043231//intracellular membrane-bounded organelle	GO:0004497//monooxygenase activity;GO:0046906//tetrapyrrole binding;GO:0046914//transition metal ion binding	GO:0006568//tryptophan metabolic process;GO:0006811//ion transport;GO:0009653//anatomical structure morphogenesis;GO:0009683//indoleacetic acid metabolic process;GO:0010683//tricyclic triterpenoid metabolic process;GO:0048364//root development;GO:0048869//cellular developmental process;GO:0050896//response to stimulus
MSTRG.53685	At1g56220	51.61	71.33	107.29	17.69	31.78	16.15	67.99	86.65	77.07	77.2367	21.8733	76.7433	1.810868336	7.37E-11	4.47E-09	0.009244473	0.098029352	0.560134593	PREDICTED: dormancy-associated protein homolog 3-like isoform X1 [Raphanus sativus]	-	GO:0043231//intracellular membrane-bounded organelle	-	GO:0008104//protein localization;GO:0009725//response to hormone
MSTRG.53686	At1g56220	2.06	1.4	3.5	0.46	1.19	1.25	1.6	1.44	1.02	1.3533	0.9667	2.32	1.263034406	0.001222553	0.013472941	-0.777607579	0.745124211	0.999767122	dormancy-associated protein homolog 3 isoform X6 [Brassica rapa]	-	GO:0043231//intracellular membrane-bounded organelle	-	GO:0008104//protein localization;GO:0009725//response to hormone
MSTRG.53722	MGP4	0.28	0.85	0.61	6.22	6.81	13.14	0.13	0.04	0.43	0.2	8.7233	0.58	-3.910754713	5.91E-11	3.63E-09	-1.5360529	0.340416922	0.931269444	PREDICTED: UDP-D-xylose:L-fucose alpha-1,3-D-xylosyltransferase MGP4-like [Brassica oleracea var. oleracea] [Brassica oleracea]	-	GO:0009536//plastid;GO:0031224//intrinsic component of membrane	GO:0008194//UDP-glycosyltransferase activity	GO:0010396//rhamnogalacturonan II metabolic process
MSTRG.53747	--	27.89	53.34	75.97	213.44	223.08	258.23	1.11	4.27	6.47	3.95	231.5833	52.4	-2.143892712	1.84E-05	0.000371062	-3.729642253	1.40E-05	0.000692716	hypothetical protein HID58_010773 [Brassica napus]	-	-	-	-
MSTRG.53774	At4g01160	0.02	0.19	0.02	0.51	2.47	1.38	0	0.09	0	0.03	1.4533	0.0767	-4.244622369	0.000367772	0.004884905	-1.353636955	0.748799833	0.999767122	PREDICTED: BTB/POZ domain-containing protein At4g01160 [Brassica oleracea var. oleracea] [Brassica oleracea]	-	GO:0043231//intracellular membrane-bounded organelle	GO:0046983//protein dimerization activity	GO:0003002//regionalization;GO:0003006//developmental process involved in reproduction;GO:0009639//response to red or far red light
MSTRG.53967	NUP98B	4.87	4.88	1.57	1.38	0.86	1.31	7.68	0.47	5.03	4.3933	1.1833	3.7733	1.672983028	2.36E-06	6.10E-05	0.219476412	0.411342502	0.977936687	BnaC03g34800D [Brassica napus]	ko03013//Nucleocytoplasmic transport	GO:0012505//endomembrane system;GO:0043231//intracellular membrane-bounded organelle;GO:0046930//pore complex	GO:0005488//binding	GO:0008104//protein localization;GO:0050658//RNA transport
MSTRG.53997	--	0.27	0.78	0.67	0.04	0.08	0.08	0.93	0.76	0.56	0.75	0.0667	0.5733	3.10433666	7.99E-06	0.000178214	0.387516437	0.105206389	0.582224629	RING/U-box superfamily protein [Arabidopsis thaliana]	-	-	GO:0005515//protein binding;GO:0046914//transition metal ion binding	-
MSTRG.54035	DTX43	3.76	5.62	3.4	21.07	23.4	17	0.92	0.9	1.75	1.19	20.49	4.26	-2.265994649	1.71E-11	1.12E-09	-1.839891857	0.005655922	0.088336081	PREDICTED: MATE efflux family protein FRD3 isoform X1 [Brassica oleracea var. oleracea] [Brassica oleracea]	-	GO:0031224//intrinsic component of membrane	GO:0015142//tricarboxylic acid transmembrane transporter activity;GO:0015291//secondary active transmembrane transporter activity	GO:0000041//transition metal ion transport;GO:0001101//response to acid chemical;GO:0009267//cellular response to starvation;GO:0009723//response to ethylene;GO:0010039//response to iron ion;GO:0015698//inorganic anion transport;GO:0015893//drug transport;GO:0034614//cellular response to reactive oxygen species;GO:0044249//cellular biosynthetic process;GO:0044711//single-organism biosynthetic pro…
MSTRG.54114	--	5.87	4.59	0.37	0.83	0.53	0.59	4.58	0.53	0.83	1.98	0.65	3.61	2.473487214	0.000286194	0.003958511	-0.866498407	0.761800367	0.999767122	BnaAnng37760D [Brassica napus]	-	-	-	-
MSTRG.54115	--	0.34	0.97	0.32	0	0	0	0.45	0	0	0.15	0	0.5433	9.085693748	0.000582659	0.007265585	-1.856875058	0.480317958	0.999767122	hypothetical protein IGI04_042543 [Brassica rapa subsp. trilocularis] [Brassica rapa]	-	-	-	-
MSTRG.54133	REM7	0.45	0.14	0.2	0	0	0	3.16	1.13	0.44	1.5767	0	0.2633	8.040746342	6.43E-05	0.001108069	2.581915625	0.000560258	0.014908141	PREDICTED: B3 domain-containing protein REM7-like [Brassica oleracea var. oleracea] [Brassica oleracea]	-	GO:0043231//intracellular membrane-bounded organelle	-	-
MSTRG.54148	CCT7	2.92	2.21	3.75	8.15	6.88	7.97	1.68	1.26	2.1	1.68	7.6667	2.96	-1.373002279	0.002677196	0.025675523	-0.817135943	0.529506883	0.999767122	T-complex protein 1 subunit eta-like [Brassica napus]	-	GO:0044444//cytoplasmic part	GO:0005515//protein binding;GO:0032550//purine ribonucleoside binding;GO:0042623//ATPase activity, coupled	GO:0006006//glucose metabolic process;GO:0006090//pyruvate metabolic process;GO:0006725//cellular aromatic compound metabolic process;GO:0006970//response to osmotic stress;GO:0010038//response to metal ion;GO:0044267//cellular protein metabolic process;GO:0071555//cell wall organization
MSTRG.54225	--	0.73	0.87	1.24	0.42	0.11	0.11	0.34	0	0.21	0.1833	0.2133	0.9467	2.14974712	6.85E-05	0.001171612	-2.368387406	0.074391753	0.483326793	Zinc finger protein [Thalictrum thalictroides]	-	-	-	-
MSTRG.54232	RPS10	1.3	1.72	1.46	3.71	3.77	4.22	0.72	0.69	0.86	0.7567	3.9	1.4933	-1.384937892	0.000681484	0.008242693	-0.980806435	0.312907516	0.910140668	PREDICTED: 30S ribosomal protein S10, chloroplastic-like [Brassica oleracea var. oleracea] [Brassica oleracea]	ko03010//Ribosome	GO:0009532//plastid stroma;GO:0030529//intracellular ribonucleoprotein complex	GO:0003676//nucleic acid binding;GO:0005198//structural molecule activity	GO:0006090//pyruvate metabolic process;GO:0006779//porphyrin-containing compound biosynthetic process;GO:0009658//chloroplast organization;GO:0009668//plastid membrane organization;GO:0010467//gene expression;GO:0016072//rRNA metabolic process
MSTRG.54390	--	1.27	1.36	0.58	0.72	0.03	0.09	0.13	0	0	0.0433	0.28	1.07	1.934112064	0.019426425	0.121611568	-4.625989769	0.001168169	0.026669093	Harbinger transposase-derived protein [Arabidopsis suecica]	-	-	-	-
MSTRG.54637	--	2.46	1.8	2.26	0.78	0.45	0.34	2.46	2.62	3.6	2.8933	0.5233	2.1733	2.054107405	4.65E-10	2.49E-08	0.412823078	0.006063567	0.093166137	unnamed protein product [Brassica oleracea]	-	-	-	-
MSTRG.54647	--	0.72	0.11	0.74	0	0.04	0.74	1.35	3.32	1.37	2.0133	0.26	0.5233	1.00921853	0.308091398	0.734429253	1.94378399	0.002619172	0.049429818	osteocalcin 2 [Brassica rapa]	-	-	-	-
MSTRG.54684	IQD1	0.04	0	0.33	0	0.15	0.07	0.34	2.29	2	1.5433	0.0733	0.1233	0.750021747	0.482012581	0.888112385	3.645415018	0.001552186	0.03318476	BnaC03g42550D [Brassica napus]	-	GO:0016020//membrane;GO:0043231//intracellular membrane-bounded organelle	-	-
MSTRG.54705	At2g39360	0.79	0.9	1.45	0	0.04	0	3.35	7.62	2.95	4.64	0.0133	1.0467	6.294620749	6.40E-07	1.90E-05	2.148322747	6.09E-06	0.000346085	probable receptor-like protein kinase At2g39360 [Arabidopsis lyrata subsp. lyrata] [Arabidopsis lyrata]	-	GO:0016020//membrane	GO:0004672//protein kinase activity	GO:0001101//response to acid chemical;GO:0001558//regulation of cell growth;GO:0015698//inorganic anion transport;GO:0016310//phosphorylation
MSTRG.54706	MYOB1	2.03	1.96	2.23	0.61	1.13	1.57	6.23	11.59	6.45	8.09	1.1033	2.0733	0.910083363	0.000410737	0.005371628	1.964187623	3.93E-09	5.88E-07	PREDICTED: myosin-binding protein 1 [Brassica oleracea var. oleracea] [Brassica oleracea]	-	-	-	-
MSTRG.54721	SCPL16	7.56	5.42	6.19	0.68	0.62	0.56	10.21	11.24	7.95	9.8	0.62	6.39	3.365475811	5.84E-30	2.76E-27	0.616965818	0.000160926	0.005408526	PREDICTED: serine carboxypeptidase-like 7 isoform X1 [Raphanus sativus]	-	GO:0005618//cell wall;GO:0043231//intracellular membrane-bounded organelle	GO:0004180//carboxypeptidase activity;GO:0016753//O-sinapoyltransferase activity	GO:0000097//sulfur amino acid biosynthetic process;GO:0006090//pyruvate metabolic process;GO:0006544//glycine metabolic process;GO:0006633//fatty acid biosynthetic process;GO:0006732//coenzyme metabolic process;GO:0006753//nucleoside phosphate metabolic process;GO:0009683//indoleacetic acid metabolic process;GO:0009694//jasmonic acid metabolic process;GO:0019538//protein metabolic process
MSTRG.54766	--	0.35	0.72	0.74	3.67	1.52	5.03	0	0.06	0.21	0.09	3.4067	0.6033	-2.497333594	0.000859732	0.009979315	-2.744958385	0.061844551	0.435202896	NLI interacting factor family protein [Arabidopsis lyrata subsp. lyrata] [Arabidopsis lyrata]	ko03013//Nucleocytoplasmic transport	GO:0005623//cell	GO:0003824//catalytic activity	GO:0003006//developmental process involved in reproduction;GO:0006464//cellular protein modification process;GO:0009628//response to abiotic stimulus;GO:0009791//post-embryonic development;GO:0044763//single-organism cellular process;GO:0048731//system development;GO:0050789//regulation of biological process
MSTRG.54884	--	0	0	0.13	0.34	9.94	2.46	0	0	0	0	4.2467	0.0433	-6.614709844	0.001044065	0.011786511	-5.437405312	0.982006263	0.999767122	BnaC03g66980D [Brassica napus]	-	-	-	-
MSTRG.54887	--	2.74	3.05	4.76	1.15	1.77	2.23	2.71	1.04	3.79	2.5133	1.7167	3.5167	1.034598662	1.99E-05	0.000397186	-0.48460657	0.884718636	0.999767122	hypothetical protein IGI04_006694 [Brassica rapa subsp. trilocularis] [Brassica rapa]	-	-	-	-
MSTRG.54903	At1g58055	0	0.65	0.33	7.63	31.33	3.58	0	0	0.21	0.07	14.18	0.3267	-5.439894474	3.68E-05	0.000678495	-2.222392421	0.579663997	0.999767122	BnaCnng23100D [Brassica napus]	-	-	-	-
MSTRG.54957	ABCG5	13.71	13.54	13.12	7.46	4.38	5.45	10.11	9.31	11.54	10.32	5.7633	13.4567	1.223345718	2.89E-16	3.41E-14	-0.382878115	0.254283465	0.849287165	PREDICTED: ABC transporter G family member 5 [Brassica oleracea var. oleracea] [Brassica oleracea]	-	GO:0031224//intrinsic component of membrane	GO:0015604//organic phosphonate transmembrane transporter activity;GO:0017111//nucleoside-triphosphatase activity;GO:0032550//purine ribonucleoside binding	GO:0009886//post-embryonic morphogenesis;GO:0044765//single-organism transport
MSTRG.55008	--	0.48	0.27	0.28	2.35	1.11	2.08	0	0	0	0	1.8467	0.3433	-2.427241639	0.001023698	0.011586955	-8.423466121	0.005338222	0.085037708	O-fucosyltransferase 31 [Morus notabilis]	-	-	GO:0016740//transferase activity	-
MSTRG.55119	--	2.19	1.65	0.96	7.91	91.07	24.77	0	0	0	0	41.25	1.6	-4.688250309	8.49E-07	2.44E-05	-10.64385619	0.000247471	0.00765673	unnamed protein product [Brassica napus]	-	-	-	-
MSTRG.55200	OFUT39	9.64	7.42	6.32	4.95	2.74	1.48	22.08	25.05	16.93	21.3533	3.0567	7.7933	1.350281291	9.64E-06	0.000209697	1.454148868	4.74E-10	8.91E-08	O-fucosyltransferase 39 isoform X1 [Brassica rapa]	-	-	GO:0016740//transferase activity	-
MSTRG.55374	TUBB2	12.66	16.43	15.16	59.44	48.98	66.25	3.18	1.71	3.71	2.8667	58.2233	14.75	-1.980882483	2.22E-14	2.11E-12	-2.36326889	2.61E-07	2.28E-05	tubulin beta-2 chain [Camelina sativa]	ko04145//Phagosome	GO:0005911//cell-cell junction;GO:0015630//microtubule cytoskeleton;GO:0016020//membrane;GO:0030312//external encapsulating structure;GO:0043231//intracellular membrane-bounded organelle;GO:0043234//protein complex	GO:0005198//structural molecule activity;GO:0017111//nucleoside-triphosphatase activity;GO:0032550//purine ribonucleoside binding	GO:0006006//glucose metabolic process;GO:0006970//response to osmotic stress;GO:0006996//organelle organization;GO:0010038//response to metal ion;GO:0043623//cellular protein complex assembly;GO:0044763//single-organism cellular process;GO:0051603//proteolysis involved in cellular protein catabolic process
MSTRG.55384	At5g62623	0	0	0	0	5.35	2.01	0	0	0	0	2.4533	0	-11.26052755	0.003191088	0.029637361	0	1	1	defensin-like protein 266 [Brassica rapa]	-	-	-	-
MSTRG.55385	--	0.96	1.03	1.51	3.17	4.44	7.16	0.13	0.08	0.21	0.14	4.9233	1.1667	-2.077242999	0.000610719	0.007555612	-3.058893689	0.000405756	0.011561342	high mobility group B protein 2 isoform X2 [Eutrema salsugineum]	-	-	-	-
MSTRG.55391	ARR13	0.02	0.04	0.11	0.26	5.09	0.52	0.06	0	0	0.02	1.9567	0.0567	-5.109753852	0.000271525	0.003792646	-1.502500341	0.692111475	0.999767122	PREDICTED: hornerin-like [Raphanus sativus]	-	GO:0043231//intracellular membrane-bounded organelle	GO:0005488//binding	GO:0000160//phosphorelay signal transduction system;GO:0009735//response to cytokinin;GO:0032870//cellular response to hormone stimulus;GO:0044238//primary metabolic process;GO:0048513//animal organ development;GO:0048638//regulation of developmental growth;GO:0071704//organic substance metabolic process;GO:2000026//regulation of multicellular organismal development
MSTRG.55436	NAC062	6.2	7.55	2.24	2.69	2.74	2.41	4.64	1.73	1.94	2.77	2.6133	5.33	1.028244379	0.000332692	0.004499125	-0.944249557	0.55311376	0.999767122	NAC transcription factor 62-3.1 [Brassica napus]	-	GO:0016020//membrane;GO:0043231//intracellular membrane-bounded organelle	GO:0001071//nucleic acid binding transcription factor activity;GO:0003824//catalytic activity;GO:0005515//protein binding	GO:0002252//immune effector process;GO:0006355//regulation of transcription, DNA-templated;GO:0006402//mRNA catabolic process;GO:0006486//protein glycosylation;GO:0007165//signal transduction;GO:0009409//response to cold;GO:0010243//response to organonitrogen compound;GO:0042127//regulation of cell proliferation;GO:0044707//single-multicellular organism process;GO:0045087//innate immune response
MSTRG.55501	--	0.19	0.2	0.25	1.29	0.94	1	0.08	0.06	0.03	0.0567	1.0767	0.2133	-2.335390355	0.000151857	0.002316864	-1.912537159	0.203589129	0.778068197	hypothetical protein F2Q68_00004389 [Brassica cretica]	-	-	-	-
MSTRG.55536	GAD2	28.3	6	14.34	1	0.18	0.16	44.55	36.61	33.4	38.1867	0.4467	16.2133	5.181838323	4.16E-13	3.37E-11	1.235888264	0.002437066	0.046850814	glutamate decarboxylase 2-like [Brassica rapa]	ko01100//Metabolic pathways;ko01110//Biosynthesis of secondary metabolites;ko00250//Alanine, aspartate and glutamate metabolism;ko00410//beta-Alanine metabolism;ko00650//Butanoate metabolism;ko00430//Taurine and hypotaurine metabolism	GO:0043231//intracellular membrane-bounded organelle;GO:0044444//cytoplasmic part	GO:0005515//protein binding;GO:0016705//oxidoreductase activity, acting on paired donors, with incorporation or reduction of molecular oxygen;GO:0016831//carboxy-lyase activity;GO:0043168//anion binding;GO:0043169//cation binding	GO:0001101//response to acid chemical;GO:0006605//protein targeting;GO:0006873//cellular ion homeostasis;GO:0006970//response to osmotic stress;GO:0009064//glutamine family amino acid metabolic process;GO:0009746//response to hexose;GO:0009891//positive regulation of biosynthetic process;GO:0010038//response to metal ion;GO:0015698//inorganic anion transport;GO:0030001//metal ion transport;GO:003…
MSTRG.55548	--	0.54	1.36	0.63	0.12	0.22	0.3	0.4	0.48	0.19	0.3567	0.2133	0.8433	1.982993575	0.0004583	0.005903707	-1.241526588	0.436715661	0.993732819	BnaC08g09150D [Brassica napus]	-	-	-	-
MSTRG.55551	--	0.44	0.38	0.94	0.16	0.19	0	0.35	0.37	1.59	0.77	0.1167	0.5867	2.330148602	0.003432971	0.031358869	0.392317423	0.281322783	0.877110131	unnamed protein product [Brassica napus]	-	-	-	-
MSTRG.55572	NPF2.3	2.78	0.79	2.75	0.85	0.9	0.68	0.87	0.16	1.85	0.96	0.81	2.1067	1.378968245	0.000277873	0.003864088	-1.133855747	0.521068637	0.999767122	protein NRT1/ PTR FAMILY 2.3-like isoform X2 [Brassica rapa]	-	GO:0031224//intrinsic component of membrane	-	GO:0015833//peptide transport;GO:0042126//nitrate metabolic process;GO:0045491//xylan metabolic process;GO:0051707//response to other organism
MSTRG.55756	--	0.82	0.69	0.35	0	0.26	0.14	0.98	0.68	0.23	0.63	0.1333	0.62	2.217230716	0.001990914	0.020098578	0.023083613	0.474607553	0.999767122	-	-	-	-	-
MSTRG.55890	--	0.51	0.67	0.71	0.1	0.35	0.1	0.12	0	0.15	0.09	0.1833	0.63	1.780882711	0.00101429	0.01150652	-2.807354922	0.027970215	0.266962782	hypothetical protein DY000_02004712 [Brassica cretica]	-	-	-	-
MSTRG.5593	--	0.15	0.1	0.33	0.96	2.78	2.05	0	0.04	0	0.0133	1.93	0.1933	-3.319438543	0.00011354	0.001816485	-3.857980995	0.080348062	0.50295657	BnaA02g35280D [Brassica napus]	-	GO:0043231//intracellular membrane-bounded organelle	-	-
MSTRG.55932	--	0.06	0.04	0.21	0.73	0.41	1.14	0	0	0.11	0.0367	0.76	0.1033	-2.878693704	0.005292169	0.044396226	-1.494764692	0.624947284	0.999767122	Harbinger transposase-derived protein [Arabidopsis suecica]	-	-	-	-
MSTRG.56033	RE2	6.63	2.35	0.6	1.52	0.41	0.49	3.97	0	1.07	1.68	0.8067	3.1933	1.985018608	0.004966778	0.042208179	-0.926601922	0.779344134	0.999767122	copia-like protein [Brassica oleracea]	-	-	-	-
MSTRG.56076	ICL	0.15	1.88	0.02	0.1	0.05	0.02	1.17	21.89	0.18	7.7467	0.0567	0.6833	3.592017258	0.004604574	0.039708681	3.502914254	0.012880581	0.159555409	PREDICTED: LOW QUALITY PROTEIN: isocitrate lyase [Brassica oleracea var. oleracea] [Brassica oleracea]	ko01100//Metabolic pathways;ko01110//Biosynthesis of secondary metabolites;ko01200//Carbon metabolism;ko00630//Glyoxylate and dicarboxylate metabolism	GO:0005777//peroxisome	GO:0016833//oxo-acid-lyase activity	GO:0003006//developmental process involved in reproduction;GO:0006101//citrate metabolic process;GO:0044262//cellular carbohydrate metabolic process
MSTRG.56127	KIN10A	0.2	0.44	0.18	2.38	2.44	1.27	0.14	0.1	0.16	0.1333	2.03	0.2733	-2.892746413	5.17E-06	0.00012191	-1.03562391	0.568286936	0.999767122	kinesin-like protein KIN-10A [Brassica rapa]	-	GO:0015630//microtubule cytoskeleton;GO:0044444//cytoplasmic part	GO:0003774//motor activity;GO:0032550//purine ribonucleoside binding	GO:0006342//chromatin silencing;GO:0007017//microtubule-based process;GO:0034968//histone lysine methylation;GO:0048449//floral organ formation;GO:0048580//regulation of post-embryonic development;GO:1902410//mitotic cytokinetic process
MSTRG.56301	--	1.12	0.64	1.04	0.3	0.29	0.49	0.58	0.2	0.51	0.43	0.36	0.9333	1.374395515	0.004049251	0.03587462	-1.118055762	0.514240953	0.999767122	vesicular transport factor [Salix suchowensis]	-	-	-	-
MSTRG.56456	TPS26	4.97	0.06	3.66	0.14	0	0	4.42	3.91	3.69	4.0067	0.0467	2.8967	5.955857445	0.000160282	0.002426676	0.468008814	0.363208112	0.949523771	terpenoid synthase 26-like [Brassica napus]	-	GO:0005911//cell-cell junction;GO:0009536//plastid	GO:0016838//carbon-oxygen lyase activity, acting on phosphates	GO:0006714//sesquiterpenoid metabolic process;GO:0009664//plant-type cell wall organization;GO:0009755//hormone-mediated signaling pathway;GO:0046246//terpene biosynthetic process
MSTRG.5660	TSO2	0.71	2.02	1.7	1.58	2.22	1.81	0.17	0.17	0.21	0.1833	1.87	1.4767	-0.340694072	0.570801164	0.930640331	-3.009803175	0.000221536	0.007022417	BnaA03g52980D [Brassica napus]	ko01100//Metabolic pathways;ko00230//Purine metabolism;ko00240//Pyrimidine metabolism;ko00480//Glutathione metabolism	GO:0031224//intrinsic component of membrane;GO:0043231//intracellular membrane-bounded organelle;GO:0044444//cytoplasmic part	GO:0016728//oxidoreductase activity, acting on CH or CH2 groups, disulfide as acceptor;GO:0016757//transferase activity, transferring glycosyl groups;GO:0046872//metal ion binding	GO:0006221//pyrimidine nucleotide biosynthetic process;GO:0006260//DNA replication;GO:0007049//cell cycle;GO:0008219//cell death;GO:0009132//nucleoside diphosphate metabolic process;GO:0044707//single-multicellular organism process
MSTRG.56627	--	0.28	0.79	0.24	2.26	3.37	1.48	0.01	0	0	0.0033	2.37	0.4367	-2.440282748	0.001325391	0.014390321	-7.033423002	0.000227218	0.007169045	BnaC03g54850D [Brassica napus]	-	-	-	-
MSTRG.56652	GIP	2.07	1.61	2.62	0.1	0.11	0.01	4.44	2.14	4.05	3.5433	0.0733	2.1	4.8397764	1.90E-16	2.30E-14	0.754717863	0.00044506	0.012429025	Terpene synthase N-terminal domain [Arabidopsis suecica]	-	-	GO:0016787//hydrolase activity	-
MSTRG.56653	BGLU3	3.57	2.58	2.35	0.02	0.15	0.04	7.26	6.94	6.06	6.7533	0.07	2.8333	5.339001608	1.02E-09	5.18E-08	1.253099428	4.43E-10	8.42E-08	Terpene synthase N-terminal domain [Arabidopsis suecica]	-	-	GO:0016787//hydrolase activity	-
MSTRG.56697	--	7.89	7.73	7	3.39	5.03	2.49	11.26	12.46	11.86	11.86	3.6367	7.54	1.051947828	5.14E-09	2.32E-07	0.653467581	2.16E-09	3.43E-07	BnaAnng22330D [Brassica napus]	-	-	-	-
MSTRG.56792	VPS45	3.32	3.03	2.37	10.47	8.36	8.95	1.49	1.91	0.65	1.35	9.26	2.9067	-1.671646559	1.00E-06	2.84E-05	-1.106406227	0.345656969	0.935959917	vacuolar protein sorting-associated protein 45 homolog isoform X2 [Brassica napus]	ko04144//Endocytosis	GO:0005774//vacuolar membrane;GO:0031984//organelle subcompartment	GO:0005488//binding;GO:0022892//substrate-specific transporter activity	GO:0006605//protein targeting;GO:0006865//amino acid transport;GO:0015672//monovalent inorganic cation transport;GO:0015748//organophosphate ester transport;GO:0016482//cytoplasmic transport;GO:0043067//regulation of programmed cell death;GO:0048278//vesicle docking;GO:0051049//regulation of transport;GO:0051707//response to other organism;GO:0061024//membrane organization;GO:0070838//divalent me…
MSTRG.56811	LGALDH	0.94	0.92	0.61	0.11	0.28	0.19	0.41	0.6	1.01	0.6733	0.1933	0.8233	2.090386236	2.27E-05	0.000445549	-0.290155749	0.644497693	0.999767122	L-galactose dehydrogenase-like [Brassica napus]	ko01100//Metabolic pathways;ko01110//Biosynthesis of secondary metabolites;ko00053//Ascorbate and aldarate metabolism	GO:0044444//cytoplasmic part	GO:0016646//oxidoreductase activity, acting on the CH-NH group of donors, NAD or NADP as acceptor	GO:0019852//L-ascorbic acid metabolic process
MSTRG.56988	LCR25	0.2	0.21	0	1.22	10.68	2.26	0	0	0	0	4.72	0.1367	-5.110053545	0.000444908	0.005752124	-7.094517599	0.619571804	0.999767122	defensin-like protein 159 [Brassica napus]	-	-	-	-
MSTRG.56989	LCR25	0	0	0	0.58	9.47	3.93	0	0	0	0	4.66	0	-12.18611424	3.49E-05	0.000647078	0	1	1	defensin-like protein 161 [Brassica napus]	-	-	-	-
MSTRG.56999	--	1.07	1.25	1.11	0.88	1.25	1.16	0.28	0.09	0.3	0.2233	1.0967	1.1433	0.060120992	0.031399339	0.173111928	-2.355975576	0.000582905	0.015347008	hypothetical protein IGI04_031435 [Brassica rapa subsp. trilocularis] [Brassica rapa]	-	-	-	-
MSTRG.57004	RDL3	0.44	0.4	0.94	2.52	2.63	2.19	0.13	0.12	0.26	0.17	2.4467	0.5933	-2.043902822	0.000910065	0.010466729	-1.803308089	0.153162485	0.692217511	PREDICTED: probable cysteine proteinase At3g43960 [Brassica oleracea var. oleracea] [Brassica oleracea]	-	GO:0031224//intrinsic component of membrane;GO:0044444//cytoplasmic part	GO:0016491//oxidoreductase activity;GO:0070011//peptidase activity, acting on L-amino acid peptides	GO:0000097//sulfur amino acid biosynthetic process;GO:0016129//phytosteroid biosynthetic process;GO:0019538//protein metabolic process;GO:0030001//metal ion transport;GO:0048588//developmental cell growth
MSTRG.57062	--	1.66	1.17	0.96	0.6	0.43	0.29	1.52	1.64	0.68	1.28	0.44	1.2633	1.521659919	3.45E-07	1.08E-05	0.018908463	0.233424835	0.819793667	F22C12.1 [Arabidopsis thaliana]	-	-	-	-
MSTRG.57216	--	0.23	0.4	0.73	1.83	2.22	2.4	0	0	0.17	0.0567	2.15	0.4533	-2.245692509	0.000914384	0.010503553	-3	0.130867056	0.644062764	BnaC06g07610D [Brassica napus]	-	-	-	-
MSTRG.57329	--	0.62	0.44	0.33	3.5	1.49	1.99	0	0	0.21	0.07	2.3267	0.4633	-2.328142153	0.004285364	0.037478082	-2.72662365	0.178100931	0.738347129	hypothetical protein F2Q70_00042763 [Brassica cretica]	-	-	-	-
MSTRG.57367	--	0.5	0.27	0.46	0	0.14	0	2.01	2.17	1.71	1.9633	0.0467	0.41	3.135159583	0.002661693	0.025549903	2.259609318	7.11E-09	9.89E-07	hypothetical protein F2Q70_00039729 [Brassica cretica]	-	-	-	-
MSTRG.57372	OXA1L	2.07	3.34	2.28	0.82	1.36	1.16	0.79	2.3	2.06	1.7167	1.1133	2.5633	1.203135495	1.01E-07	3.58E-06	-0.578411166	0.939132369	0.999767122	inner membrane protein oxa1-related [Brassica oleracea]	ko03060//Protein export	GO:0019866//organelle inner membrane;GO:0031224//intrinsic component of membrane;GO:0043231//intracellular membrane-bounded organelle	GO:0008320//protein transmembrane transporter activity	GO:0006605//protein targeting;GO:0006839//mitochondrial transport;GO:0065003//macromolecular complex assembly;GO:0090150//establishment of protein localization to membrane
MSTRG.57457	ERS1	1.49	2.69	1.96	5.21	5.71	8.56	0.94	0.73	1.26	0.9767	6.4933	2.0467	-1.665683117	0.000837927	0.009776266	-1.067337991	0.217355014	0.798855612	BnaC04g51810D [Brassica napus]	ko04075//Plant hormone signal transduction;ko04016//MAPK signaling pathway - plant	GO:0031090//organelle membrane;GO:0031224//intrinsic component of membrane;GO:0043231//intracellular membrane-bounded organelle	GO:0004673//protein histidine kinase activity;GO:0004871//signal transducer activity;GO:0005515//protein binding;GO:0032550//purine ribonucleoside binding;GO:0043169//cation binding;GO:0072328//alkene binding	GO:0001101//response to acid chemical;GO:0006468//protein phosphorylation;GO:0006725//cellular aromatic compound metabolic process;GO:0006950//response to stress;GO:0009617//response to bacterium;GO:0009720//detection of hormone stimulus;GO:0009756//carbohydrate mediated signaling;GO:0010104//regulation of ethylene-activated signaling pathway;GO:0010468//regulation of gene expression;GO:0042743//…
MSTRG.57458	NDT1	12.91	10.82	11.77	4.79	3.15	4.06	6.51	6.67	8.6	7.26	4	11.8333	1.564784619	7.00E-32	3.91E-29	-0.704815071	0.38794377	0.965290966	BnaC04g51240D [Brassica napus]	-	GO:0042170//plastid membrane;GO:0043234//protein complex	GO:0005488//binding;GO:0016836//hydro-lyase activity;GO:0051184//cofactor transporter activity	GO:0003006//developmental process involved in reproduction;GO:0006101//citrate metabolic process;GO:0006862//nucleotide transport;GO:0006970//response to osmotic stress;GO:0042126//nitrate metabolic process;GO:0043648//dicarboxylic acid metabolic process
MSTRG.57474	bVPE	66.9	54.92	55.36	26.4	16.13	13.94	64.34	75.14	60	66.4933	18.8233	59.06	1.649659226	1.16E-15	1.29E-13	0.171028346	0.00205985	0.041336083	vacuolar-processing enzyme beta-isozyme-like [Brassica napus]	-	GO:0000322//storage vacuole	GO:0004175//endopeptidase activity	GO:0007033//vacuole organization;GO:0016485//protein processing
MSTRG.57475	bVPE	5.29	2.88	4.76	1.15	0.56	0.6	6.08	5.06	4.37	5.17	0.77	4.31	2.484757518	5.13E-13	4.11E-11	0.262476411	0.02233929	0.231447552	PREDICTED: LOW QUALITY PROTEIN: vacuolar-processing enzyme beta-isozyme-like [Brassica oleracea var. oleracea] [Brassica oleracea]	-	GO:0005773//vacuole	GO:0004175//endopeptidase activity	GO:0009987//cellular process;GO:0016485//protein processing
MSTRG.5748	ARID4	0.64	0.4	0.63	0	0	0.05	0.06	0.07	0.15	0.0933	0.0167	0.5567	5.061776198	0.000107851	0.001737162	-2.57634937	0.068160953	0.460670514	AT-rich interactive domain-containing protein 4 [Solanum lycopersicum]	-	-	-	-
MSTRG.57481	SOT1	1.27	0.6	0.12	0	0	0	0.46	0	0.31	0.2567	0	0.6633	9.373590215	3.24E-05	0.000606789	-1.36983808	0.546965731	0.999767122	PREDICTED: cytosolic sulfotransferase 5-like [Brassica oleracea var. oleracea] [Brassica oleracea]	-	GO:0009536//plastid	GO:0008146//sulfotransferase activity	GO:0006468//protein phosphorylation;GO:0009755//hormone-mediated signaling pathway;GO:0016128//phytosteroid metabolic process
MSTRG.57486	--	0.87	0.7	0.12	23.87	158.59	53.9	0	0	0	0	78.7867	0.5633	-7.127818847	7.40E-15	7.54E-13	-9.13784503	0.107064482	0.587794494	pollen coat protein B3 [Brassica rapa]	-	-	-	-
MSTRG.57575	--	0	0.09	0.57	5.81	1.6	8.36	0.12	0.17	0	0.0967	5.2567	0.22	-4.578572825	0.000122048	0.00192569	-1.186413124	0.969099035	0.999767122	hypothetical protein Bca52824_050136 [Brassica carinata]	-	-	-	-
MSTRG.57928	BGLU29	44.1	39.68	44.23	13.39	9.07	7.21	21.61	23.02	37.38	27.3367	9.89	42.67	2.109179684	9.12E-27	3.00E-24	-0.642384774	0.900308418	0.999767122	BnaC04g03760D [Brassica napus]	ko01100//Metabolic pathways;ko01110//Biosynthesis of secondary metabolites;ko00940//Phenylpropanoid biosynthesis;ko00500//Starch and sucrose metabolism;ko00460//Cyanoamino acid metabolism	GO:0005911//cell-cell junction;GO:0009536//plastid;GO:0042579//microbody	GO:0015926//glucosidase activity;GO:0019899//enzyme binding;GO:0046914//transition metal ion binding;GO:0046983//protein dimerization activity	GO:0006355//regulation of transcription, DNA-templated;GO:0006952//defense response;GO:0006970//response to osmotic stress;GO:0006996//organelle organization;GO:0009409//response to cold;GO:0009608//response to symbiont;GO:0009725//response to hormone;GO:0009746//response to hexose;GO:0009827//plant-type cell wall modification;GO:0034285//response to disaccharide;GO:0044767//single-organism devel…
MSTRG.58133	--	0.43	0.25	0.21	3.63	1.86	2.26	0	0.05	0	0.0167	2.5833	0.2967	-3.122319069	9.48E-06	0.000206913	-4.153805336	0.041849534	0.344205122	BnaC05g36830D [Brassica napus]	-	-	-	-
MSTRG.58227	--	5.5	3.77	2.95	0.12	0.58	0	6.97	6.41	5.57	6.3167	0.2333	4.0733	4.125745553	1.81E-07	6.04E-06	0.632953563	0.002980025	0.054631995	BnaC02g20670D [Brassica napus]	-	-	-	-
MSTRG.58257	AtMg01250	0	0	0	1.27	0	0.88	0	0	0	0	0.7167	0	-9.485158444	0.003158949	0.029390264	0	1	1	Reverse transcriptase domain [Arabidopsis suecica]	-	-	-	-
MSTRG.58281	--	2.73	2.15	4.05	8.48	37.82	26.1	0.45	2.67	4.87	2.6633	24.1333	2.9767	-3.019257617	4.10E-05	0.000745781	-0.160464672	0.617769636	0.999767122	unnamed protein product [Brassica napus]	-	-	-	-
MSTRG.58334	PRP31	0.78	0.81	0.71	1.03	1.27	0.99	1.99	3.44	1.94	2.4567	1.0967	0.7667	-0.516453723	0.646948349	0.960992109	1.680030758	3.23E-08	3.69E-06	U4/U6 small nuclear ribonucleoprotein Prp31 homolog [Brassica rapa]	ko03040//Spliceosome	GO:0044423//virion part;GO:0097525//spliceosomal snRNP complex	-	GO:0000377//RNA splicing, via transesterification reactions with bulged adenosine as nucleophile;GO:0003006//developmental process involved in reproduction
MSTRG.58335	--	0.03	0	0.08	0.06	0.11	0.11	0.3	1.28	0.82	0.8	0.0933	0.0367	-1.347923303	0.473216579	0.881547154	4.447458977	1.36E-05	0.000680346	LOW QUALITY PROTEIN: pentatricopeptide repeat-containing protein At4g19440, chloroplastic-like [Brassica rapa]	-	-	-	-
MSTRG.58390	--	0.42	0.16	1.19	0	0	0	0	0	0.28	0.0933	0	0.59	9.204571144	0.000227877	0.003276132	-2.660250628	0.280792077	0.876324654	Xyloglucan endo-transglycosylase C-terminal [Arabidopsis thaliana x Arabidopsis arenosa]	-	-	-	-
MSTRG.58565	At3g47300	0.29	0.24	0.6	1.49	3.1	2.3	0.05	0.1	0.13	0.0933	2.2967	0.3767	-2.60818121	0.000176557	0.002636906	-2.01282404	0.131323463	0.645278157	PREDICTED: LOW QUALITY PROTEIN: selT-like protein [Tarenaya hassleriana]	-	GO:0009536//plastid;GO:0016020//membrane	-	-
MSTRG.58575	--	0.2	0.56	0.24	0.94	8.39	1.25	0.03	0.11	0.39	0.1767	3.5267	0.3333	-3.403267722	0.00277858	0.026477518	-0.915935735	0.44850428	0.996914696	BnaC07g15710D [Brassica napus]	-	GO:0031301//integral component of organelle membrane;GO:0044434//chloroplast part	GO:0005488//binding	GO:0006351//transcription, DNA-templated;GO:0006950//response to stress;GO:0009314//response to radiation
MSTRG.58582	--	2.99	3.54	4	9.83	8.14	9.83	1.28	0.98	1.45	1.2367	9.2667	3.51	-1.400579447	0.000583384	0.007272488	-1.505014344	0.021415217	0.224772138	-	-	-	-	-
MSTRG.58625	--	0.22	0.47	0.24	0	0	0	0.57	0	0	0.19	0	0.31	8.276124405	0.003359049	0.030823379	-0.706268797	0.942313542	0.999767122	P-loop containing nucleoside triphosphate hydrolase [Arabidopsis thaliana x Arabidopsis arenosa]	-	-	-	-
MSTRG.58728	--	0.72	0.46	0.4	2.22	2.54	2.13	0.29	0.04	0.32	0.2167	2.2967	0.5267	-2.124579425	5.65E-05	0.000989373	-1.281412935	0.402212483	0.972961363	electron transfer flavoprotein subunit alpha, mitochondrial [Vitis riparia]	-	-	-	-
MSTRG.58779	--	0.87	0	1.44	0	0	0.44	5.21	10.63	2.5	6.1133	0.1467	0.77	2.392317423	0.180677501	0.550974051	2.989028882	0.002403324	0.046344377	BnaAnng04230D [Brassica napus]	-	-	-	-
MSTRG.58974	BCAT6	3.31	2.96	2.23	1.22	0.84	0.64	2.64	2.33	2.53	2.5	0.9	2.8333	1.654503434	1.38E-10	8.01E-09	-0.180572246	0.185160755	0.748996966	PREDICTED: branched-chain-amino-acid aminotransferase 6-like [Raphanus sativus]	ko01100//Metabolic pathways;ko01110//Biosynthesis of secondary metabolites;ko01230//Biosynthesis of amino acids;ko00270//Cysteine and methionine metabolism;ko01210//2-Oxocarboxylic acid metabolism;ko00280//Valine, leucine and isoleucine degradation;ko00770//Pantothenate and CoA biosynthesis;ko00966//Glucosinolate biosynthesis;ko00290//Valine, leucine and isoleucine biosynthesis	GO:0009532//plastid stroma	GO:0004084//branched-chain-amino-acid transaminase activity	GO:0006549//isoleucine metabolic process;GO:0006551//leucine metabolic process;GO:0006573//valine metabolic process;GO:0006637//acyl-CoA metabolic process;GO:0008652//cellular amino acid biosynthetic process;GO:0009404//toxin metabolic process;GO:0035556//intracellular signal transduction
MSTRG.5898	DGK4	0.34	0.15	0.09	0	0	0.02	1.35	0.82	0.5	0.89	0.0067	0.1933	4.857980995	0.000605132	0.007503977	2.202714937	0.000223415	0.007062715	diacylglycerol kinase 4 [Brassica rapa]	ko01100//Metabolic pathways;ko01110//Biosynthesis of secondary metabolites;ko00564//Glycerophospholipid metabolism;ko00561//Glycerolipid metabolism;ko04070//Phosphatidylinositol signaling system	-	-	GO:0009987//cellular process
MSTRG.59209	UGT71C2	1.41	0.67	0.78	0.1	0.19	0.09	1.4	0.94	1.74	1.36	0.1267	0.9533	2.911943823	6.29E-08	2.31E-06	0.512554005	0.035804625	0.311716806	PREDICTED: UDP-glycosyltransferase 71C2-like [Brassica oleracea var. oleracea] [Brassica oleracea]	-	-	-	-
MSTRG.59254	--	0.22	0.9	0.22	0.1	0	0	0	0	0.11	0.0367	0.0333	0.4467	3.744161096	0.002080541	0.020844555	-3.606657572	0.056902743	0.414473883	BnaC05g37180D [Brassica napus]	-	-	-	-
MSTRG.59260	EXPA6	0	0	0	0.32	1.06	0.74	0	0	0	0	0.7067	0	-9.464886049	0.002835232	0.026905977	0	1	1	PREDICTED: expansin-A6-like [Brassica oleracea var. oleracea] [Brassica oleracea]	-	GO:0005618//cell wall	-	GO:0000226//microtubule cytoskeleton organization;GO:0000902//cell morphogenesis;GO:0006970//response to osmotic stress;GO:0009827//plant-type cell wall modification;GO:0048646//anatomical structure formation involved in morphogenesis;GO:0070838//divalent metal ion transport
MSTRG.59383	ESF1.3	0.43	0.09	0.09	7.77	65.37	24.62	0	0	0	0	32.5867	0.2033	-7.324291232	1.04E-11	7.08E-10	-7.667702932	0.342176579	0.933253667	pollen coat protein B23 [Brassica oleracea]	-	-	-	-
MSTRG.59388	CBP60G	1.03	0.78	1.3	3.01	2.36	4.76	0.46	0.2	0.63	0.43	3.3767	1.0367	-1.703647689	0.004292072	0.037518527	-1.269543515	0.20708673	0.783035487	probable WRKY transcription factor 19 isoform X1 [Brassica rapa]	-	-	GO:0001071//nucleic acid binding transcription factor activity;GO:0003677//DNA binding;GO:0005515//protein binding	GO:0001666//response to hypoxia;GO:0002831//regulation of response to biotic stimulus;GO:0006091//generation of precursor metabolites and energy;GO:0006605//protein targeting;GO:0009620//response to fungus;GO:0009755//hormone-mediated signaling pathway;GO:0009814//defense response, incompatible interaction;GO:0009863//salicylic acid mediated signaling pathway;GO:0010243//response to organonitroge…
MSTRG.59459	--	0.47	8.13	0.86	1.31	12.27	0.95	0.13	0.15	0.26	0.18	4.8433	3.1533	-0.619122614	1	1	-4.130808871	0.001213088	0.02749419	BnaA09g22890D [Brassica napus]	-	-	-	-
MSTRG.59464	--	0	0	0	0.64	0.31	0.86	0	0.05	0	0.0167	0.6033	0	-9.236811481	2.89E-06	7.33E-05	4.058893689	0.473273854	0.999767122	PLATZ transcription factor family protein [Arabidopsis thaliana]	-	-	-	GO:0009408//response to heat
MSTRG.59475	scw1	0	0	0	0	0	0	0.33	0.95	0.3	0.5267	0	0	0	1	1	9.040746342	4.49E-06	0.000265029	BnaC01g32160D [Brassica napus]	-	-	GO:0097159//organic cyclic compound binding	-
MSTRG.59513	--	0	0	0.05	0.4	0.75	2.12	0	0	0	0	1.09	0.0167	-6.031218731	0.000657078	0.008010208	-4.058893689	0.982006263	0.999767122	replication protein A 70 kDa DNA-binding subunit C-like [Brassica napus]	ko03420//Nucleotide excision repair;ko03440//Homologous recombination;ko03030//DNA replication;ko03430//Mismatch repair	-	-	-
MSTRG.59539	GSTU18	0.73	0.19	0.52	0.16	0.09	0.17	0.67	0.36	0.42	0.4833	0.14	0.48	1.777607579	0.002759183	0.026328105	0.009984089	0.437451014	0.994455159	glutathione S-transferase U18-like [Brassica napus]	ko00480//Glutathione metabolism	GO:0044444//cytoplasmic part	GO:0016765//transferase activity, transferring alkyl or aryl (other than methyl) groups	GO:0006739//NADP metabolic process;GO:0009404//toxin metabolic process;GO:0014070//response to organic cyclic compound;GO:0044257//cellular protein catabolic process
MSTRG.59590	--	2.86	1.4	2.25	8.77	6.45	10.12	0.21	0.27	0.75	0.41	8.4467	2.17	-1.960687076	9.86E-05	0.001606195	-2.403999228	0.005398754	0.085666819	Harbinger transposase-derived protein [Arabidopsis suecica]	-	-	-	-
MSTRG.59666	--	1.42	1.23	1.78	2.9	2.72	4.51	0.17	0.15	0.39	0.2367	3.3767	1.4767	-1.19325557	0.080009932	0.333006367	-2.641415769	0.000214497	0.006844565	BnaA09g22890D [Brassica napus]	-	-	-	-
MSTRG.59680	--	0.52	0.41	1.22	5.32	2.08	6.85	0	0	0.29	0.0967	4.75	0.7167	-2.728553354	0.004444508	0.038556421	-2.890211854	0.170099279	0.725441608	-	-	-	-	-
MSTRG.59714	--	2.78	1.7	3.36	5.15	2.79	2.6	0.33	0.04	0.33	0.2333	3.5133	2.6133	-0.426949308	0.620067581	0.954531612	-3.485426827	7.07E-05	0.002721766	hypothetical protein F2Q68_00025508 [Brassica cretica]	-	-	-	-
MSTRG.59716	--	4.56	3.88	7.37	0.91	1.09	4.17	2.35	0.21	1.48	1.3467	2.0567	5.27	1.357494973	0.00562696	0.046624868	-1.96841017	0.083872007	0.515350117	hypothetical protein F2Q68_00025514 [Brassica cretica]	-	-	-	-
MSTRG.59808	--	0.09	0.1	0.1	4.78	3.73	3.34	0	0	0	0	3.95	0.0967	-5.352690349	6.84E-17	8.76E-15	-6.594946589	0.198055695	0.769121005	BnaC03g66020D [Brassica napus]	ko03420//Nucleotide excision repair;ko03440//Homologous recombination;ko03030//DNA replication;ko03430//Mismatch repair	-	-	-
MSTRG.59831	At1g63010	2.13	0.53	0	0	0	0	0.24	0.07	0.3	0.2033	0	0.8867	9.79224803	0.004961877	0.042170746	-2.124545098	0.345130156	0.935796971	PREDICTED: SPX domain-containing membrane protein At1g63010-like isoform X1 [Camelina sativa]	-	GO:0005773//vacuole;GO:0031090//organelle membrane;GO:0031224//intrinsic component of membrane	-	GO:0006970//response to osmotic stress;GO:0006996//organelle organization;GO:0009267//cellular response to starvation;GO:0015698//inorganic anion transport;GO:0070838//divalent metal ion transport
MSTRG.59840	TPLATE	0.34	0.28	0.12	0.67	0.58	0.25	0.97	1.41	0.78	1.0533	0.5	0.2467	-1.019365325	0.635842339	0.960992109	2.094327383	0.000137229	0.004737234	protein TPLATE-like [Brassica napus]	-	GO:0005911//cell-cell junction;GO:0016020//membrane;GO:0043232//intracellular non-membrane-bounded organelle;GO:0044444//cytoplasmic part	-	GO:0016192//vesicle-mediated transport;GO:0030243//cellulose metabolic process;GO:0048229//gametophyte development
MSTRG.59845	HMA5	0.29	0.39	0.16	1.05	1.6	0.9	0.02	0.24	0.13	0.13	1.1833	0.28	-2.079357792	0.001912585	0.019418566	-1.106915204	0.629816542	0.999767122	PREDICTED: probable copper-transporting ATPase HMA5 [Brassica oleracea var. oleracea] [Brassica oleracea]	ko04016//MAPK signaling pathway - plant	GO:0031224//intrinsic component of membrane	GO:0032550//purine ribonucleoside binding;GO:0043682//copper-transporting ATPase activity;GO:0046914//transition metal ion binding	GO:0010038//response to metal ion;GO:0035434//copper ion transmembrane transport;GO:0061687//detoxification of inorganic compound
MSTRG.59904	--	0.1	0	0.06	3.09	0.45	3.27	0	0	0	0	2.27	0.0533	-5.411510988	0.000178103	0.002653464	-5.736965594	0.695547706	0.999767122	BnaC01g41410D [Brassica napus]	-	-	-	-
MSTRG.60026	--	6	10.18	9.94	20.13	45.75	22.99	0.09	1.78	2.42	1.43	29.6233	8.7067	-1.766541591	0.004797195	0.041017244	-2.606105344	0.036883567	0.318074381	BnaC05g26530D [Brassica napus]	-	-	-	-
MSTRG.60036	--	9.73	14.25	10.47	11.72	4.72	6.74	0.66	0.9	0.9	0.82	7.7267	11.4833	0.571623417	0.00113544	0.012671151	-3.807773762	8.17E-21	1.69E-17	Harbinger transposase-derived protein [Arabidopsis suecica]	-	-	-	-
MSTRG.60114	SSL9	0.62	0.19	0.23	0.24	0.82	0.23	13.74	9.65	13.42	12.27	0.43	0.3467	-0.310787537	0.719798564	0.967977283	5.145442316	1.67E-29	1.24E-25	protein STRICTOSIDINE SYNTHASE-LIKE 9 [Brassica rapa]	-	GO:0009536//plastid	GO:0016843//amine-lyase activity	GO:0009411//response to UV;GO:0009812//flavonoid metabolic process;GO:0009820//alkaloid metabolic process;GO:0016129//phytosteroid biosynthetic process;GO:0034285//response to disaccharide
MSTRG.60240	XI-A	1.15	1.1	0.49	0.33	0.29	0.31	1.14	0.65	1.05	0.9467	0.31	0.9133	1.558873272	9.32E-05	0.001526307	0.051715037	0.264256701	0.859717973	PREDICTED: LOW QUALITY PROTEIN: myosin-10-like [Raphanus sativus]	-	-	-	-
MSTRG.60257	At1g29670	3.49	3.25	4.22	0.36	0.38	0.41	0.22	0.44	0.83	0.4967	0.3833	3.6533	3.252542032	1.49E-27	5.23E-25	-2.878863562	7.06E-05	0.002720354	GDSL esterase/lipase At1g29660 [Eutrema salsugineum]	-	GO:0005576//extracellular region;GO:0030312//external encapsulating structure;GO:0031976//plastid thylakoid	GO:0016788//hydrolase activity, acting on ester bonds	GO:0006631//fatty acid metabolic process;GO:0006970//response to osmotic stress;GO:0007275//multicellular organism development;GO:0009414//response to water deprivation;GO:0009746//response to hexose;GO:0009814//defense response, incompatible interaction;GO:0042044//fluid transport
MSTRG.60295	--	1.59	0.9	2.26	5.15	3.48	4.24	0.06	0.03	0.29	0.1267	4.29	1.5833	-1.438012635	0.124554282	0.443196189	-3.64385619	0.000860955	0.021022795	BnaC05g00220D [Brassica napus]	-	-	-	-
MSTRG.60418	DOF1.3	9.74	4.79	6.12	2.65	4.95	1	23.57	23.76	23.22	23.5167	2.8667	6.8833	1.263733217	0.001019687	0.011550792	1.772504301	1.26E-10	2.76E-08	BnaC05g50970D [Brassica napus]	-	GO:0043231//intracellular membrane-bounded organelle	GO:0001071//nucleic acid binding transcription factor activity;GO:0003676//nucleic acid binding	GO:0010468//regulation of gene expression;GO:0048506//regulation of timing of meristematic phase transition
MSTRG.60489	--	2.14	2.08	2.94	1.36	0.71	0.38	1.11	0.36	0.55	0.6733	0.8167	2.3867	1.547177838	9.70E-05	0.001582525	-1.825604295	0.052188902	0.393586875	hypothetical protein DY000_02021270 [Brassica cretica]	-	-	-	-
MSTRG.60535	SC35	3.92	3.64	4.57	0.9	2.05	0.99	2.79	2.8	2.59	2.7267	1.3133	4.0433	1.622312016	5.56E-09	2.49E-07	-0.568406802	0.922485786	0.999767122	BnaC04g29470D [Brassica napus]	-	GO:0043231//intracellular membrane-bounded organelle;GO:0044444//cytoplasmic part	GO:0004866//endopeptidase inhibitor activity;GO:0046914//transition metal ion binding	GO:0006970//response to osmotic stress
MSTRG.60550	--	34.03	35.16	35.99	19.52	13.53	7.28	29.3	45.37	32.97	35.88	13.4433	35.06	1.382935091	1.20E-08	5.06E-07	0.033353894	0.038112446	0.325330077	-	-	-	-	-
MSTRG.60632	--	0.62	0.15	0.2	0.13	0	0.04	1.27	1.46	0.85	1.1933	0.0567	0.3233	2.512450001	0.016161995	0.105821903	1.883902935	0.002138986	0.04251554	PREDICTED: glucose and ribitol dehydrogenase homolog 1-like [Raphanus sativus]	-	-	-	-
MSTRG.60643	At1g65710	0.13	0.53	0.23	3.41	7.57	7.89	0	0.09	0	0.03	6.29	0.2967	-4.406145277	2.19E-11	1.41E-09	-3.30580843	0.095228493	0.551635011	BnaCnng25400D [Brassica napus]	-	-	-	-
MSTRG.60884	RF45	0.48	0.21	0.76	0.66	0.29	0.27	0.04	0	0	0.0133	0.4067	0.4833	0.249171752	0.191203667	0.569509616	-5.17990909	0.001046066	0.024466215	PREDICTED: probable disease resistance protein RXW24L [Brassica oleracea var. oleracea] [Brassica oleracea]	-	GO:0016020//membrane	-	GO:0006950//response to stress;GO:0009620//response to fungus;GO:0010033//response to organic substance
MSTRG.61116	--	0	0	0	0.03	0	0	0.15	0.25	0.19	0.1967	0.01	0	-3.321928095	0.928191093	0.987600447	7.619608644	0.00040901	0.011637783	hypothetical protein F2Q68_00027297 [Brassica cretica]	-	-	-	-
MSTRG.61119	--	1.9	1.44	1.5	1.02	0.85	0.67	3.96	5.54	2.44	3.98	0.8467	1.6133	0.930178551	7.53E-07	2.19E-05	1.302723884	3.09E-05	0.001360298	PREDICTED: F-box protein At2g35280-like [Camelina sativa]	-	-	-	-
MSTRG.61171	--	0.2	0.39	0.31	2	3.19	0.96	0.05	0.11	0	0.0533	2.05	0.3	-2.772589504	0.001352864	0.014630004	-2.491853096	0.159907106	0.706481948	hypothetical protein F2Q68_00027378 [Brassica cretica]	-	-	-	-
MSTRG.61215	REM15.15	6.57	5.4	5.78	3.56	2.38	2.06	2.75	2.32	3.85	2.9733	2.6667	5.9167	1.14974712	1.63E-11	1.07E-09	-0.992703409	0.173484887	0.731031268	B3 domain-containing protein REM14 [Brassica napus]	-	GO:0009526//plastid envelope	-	GO:0010467//gene expression
MSTRG.61228	AtMg00310	4.19	2.64	2.8	0.62	0.45	0.14	3.76	1.23	3.15	2.7133	0.4033	3.21	2.992528751	1.12E-12	8.63E-11	-0.242507004	0.515594845	0.999767122	Reverse transcriptase zinc-binding domain [Arabidopsis thaliana x Arabidopsis arenosa]	-	-	-	-
MSTRG.61267	--	9.94	16.43	10.71	2	2.47	1.46	12.85	15.93	13.17	13.9833	1.9767	12.36	2.644537234	1.46E-28	5.84E-26	0.178029567	0.014221473	0.170745091	BnaCnng43480D [Brassica napus]	-	-	-	-
MSTRG.61376	--	7.25	5.36	8.8	26.29	19.62	23.99	0.86	0.69	2.69	1.4133	23.3	7.1367	-1.70700766	8.32E-06	0.000184953	-2.336148626	0.003974869	0.068491207	Harbinger transposase-derived protein [Arabidopsis suecica]	-	-	-	-
MSTRG.61390	--	0.38	1.01	0.47	3.09	1.82	2.55	0.28	0.24	0.18	0.2333	2.4867	0.62	-2.003873009	0.004282356	0.037463343	-1.409875794	0.264441087	0.859729139	PREDICTED: chromosome transmission fidelity protein 18 homolog [Camelina sativa]	-	-	GO:0016787//hydrolase activity	-
MSTRG.61410	SPH5	5.96	14.84	15.82	92.94	90.3	128.56	0.62	0.73	1.06	0.8033	103.9333	12.2067	-3.089917232	6.93E-10	3.63E-08	-3.92552674	1.71E-10	3.62E-08	Harbinger transposase-derived protein [Arabidopsis suecica]	-	-	-	-
MSTRG.61459	--	0.81	1.22	1.7	1.11	0.33	0.18	0.05	0	0	0.0167	0.54	1.2433	1.203181817	0.011416288	0.081417218	-6.221103725	6.82E-06	0.000381842	BnaC01g21450D [Brassica napus]	ko03420//Nucleotide excision repair;ko03440//Homologous recombination;ko03030//DNA replication;ko03430//Mismatch repair	-	-	-
MSTRG.61461	--	0.87	0	0.48	0	0	0	0	0.12	0.3	0.14	0	0.45	8.813781191	0.002189065	0.021739966	-1.684498174	0.574123004	0.999767122	BnaAnng10430D [Brassica napus]	ko03420//Nucleotide excision repair;ko03440//Homologous recombination;ko03030//DNA replication;ko03430//Mismatch repair	-	-	-
MSTRG.61492	--	4.92	4.02	5.91	1.72	3.16	1.39	4.59	8.46	5.63	6.2267	2.09	4.95	1.243925583	5.68E-06	0.000132413	0.331031524	0.029192433	0.274256645	hypothetical protein DY000_02022875 [Brassica cretica]	-	-	-	-
MSTRG.61524	--	0.54	0.64	0.39	0.49	0.92	0.39	1.47	2.16	0.99	1.54	0.6	0.5233	-0.197232347	0.53875301	0.918310231	1.557128293	0.001011713	0.023832183	BnaC03g54760D [Brassica napus]	-	-	-	-
MSTRG.6156	OPT8	0	0	0	0.11	0.21	0.18	0	0	0	0	0.1667	0	-7.380821784	0.000761791	0.00902646	0	1	1	oligopeptide transporter 8 [Brassica rapa]	-	GO:0031224//intrinsic component of membrane	GO:0015197//peptide transporter activity	GO:0003006//developmental process involved in reproduction;GO:0008104//protein localization;GO:0015833//peptide transport;GO:0044763//single-organism cellular process
MSTRG.61718	--	0.81	0.82	0.97	2.2	3.21	3.01	0.3	0.06	0.19	0.1833	2.8067	0.8667	-1.69530861	0.003089879	0.028927757	-2.2410081	0.04406281	0.355585265	hypothetical protein HID58_062652, partial [Brassica napus]	-	-	-	-
MSTRG.61747	--	24.83	27	21.4	9.15	9.93	12.04	15.15	22.59	18.88	18.8733	10.3733	24.41	1.234592736	3.80E-22	8.34E-20	-0.371123047	0.45138705	0.998079042	hypothetical protein F2Q70_00033134 [Brassica cretica]	-	-	-	-
MSTRG.61855	DOR	0.68	0.84	0.83	2.8	1.93	2.49	0.47	0.23	0.2	0.3	2.4067	0.7833	-1.61933808	0.000236326	0.003371935	-1.38466385	0.127375148	0.636689985	PREDICTED: F-box protein DOR-like [Brassica oleracea var. oleracea] [Brassica oleracea]	-	-	GO:0005488//binding	GO:0009414//response to water deprivation;GO:0009787//regulation of abscisic acid-activated signaling pathway
MSTRG.61917	--	3.19	0.67	1.82	1.19	0.66	0.58	1.79	1.62	2.17	1.86	0.81	1.8933	1.224934616	0.002733801	0.026127482	-0.025625808	0.37600704	0.960160084	80A08_13 [Brassica rapa subsp. pekinensis] [Brassica rapa]	-	-	-	-
MSTRG.61957	SPH11	0.09	0.11	1.1	4.24	0.99	15.2	0	0	0	0	6.81	0.4333	-3.974105676	0.005029276	0.042607206	-8.759333407	0.061774413	0.435122879	BnaC04g43640D [Brassica napus]	-	-	-	-
MSTRG.61958	SPH11	1.64	3.38	8.61	39.19	26.67	154.22	0.17	0	0.11	0.0933	73.36	4.5433	-4.013170578	1.61E-05	0.000329657	-5.605214925	5.66E-05	0.002268068	BnaC04g43640D [Brassica napus]	-	-	-	-
MSTRG.62008	--	2.53	3.45	1.44	9.49	15.09	11.41	6.39	3.97	2.76	4.3733	11.9967	2.4733	-2.27810501	3.67E-06	9.02E-05	0.822276628	0.00469321	0.077318812	BnaC04g44140D [Brassica napus]	-	-	-	-
MSTRG.62023	--	6.16	5.94	8.14	15.14	13.89	19.68	1.89	1.5	3.8	2.3967	16.2367	6.7467	-1.267008693	0.005798992	0.047719967	-1.493145614	0.049177488	0.378804344	unnamed protein product [Brassica napus]	-	-	-	-
MSTRG.6207	At1g56553	0	0	0	1.45	2.97	0.45	0	0	0	0	1.6233	0	-10.66474356	0.001355496	0.014648077	0	1	1	BnaA03g12590D, partial [Brassica napus]	-	-	-	-
MSTRG.62087	--	0.91	0.98	1.34	4.84	3.2	4.18	0.51	0.5	0.69	0.5667	4.0733	1.0767	-1.919638215	0.000189788	0.002797637	-0.925999419	0.527593684	0.999767122	auxin-responsive protein SAUR77-like [Brassica rapa]	-	-	-	-
MSTRG.62108	--	0.88	0.95	0.74	0	0.1	0.09	0.17	0.25	0.23	0.2167	0.0633	0.8567	3.757697036	1.37E-06	3.77E-05	-1.983256736	0.091343584	0.538785557	PREDICTED: NAC domain-containing protein 69-like [Brassica oleracea var. oleracea] [Brassica oleracea]	-	-	-	-
MSTRG.62239	--	1.77	0.82	1.65	0	0.15	0	6.84	3.49	5.42	5.25	0.05	1.4133	4.821029859	2.02E-05	0.000402619	1.893215659	1.83E-06	0.000123052	Expressed protein [Arabidopsis thaliana]	-	GO:0016020//membrane	-	-
MSTRG.62264	--	1.77	0.75	0	0	0	0	0.46	0	0.21	0.2233	0	0.84	9.714245518	0.0038052	0.034071198	-1.911190733	0.463135527	0.999767122	BnaA04g22220D [Brassica napus]	-	-	-	-
MSTRG.62295	JAL23	0.3	0.12	0.05	4.29	8.24	3.03	0.05	0.12	0.03	0.0667	5.1867	0.1567	-5.049037493	1.61E-10	9.22E-09	-1.232660757	0.636801704	0.999767122	PREDICTED: jacalin-related lectin 22-like [Brassica oleracea var. oleracea] [Brassica oleracea]	-	GO:0005911//cell-cell junction;GO:0009536//plastid	GO:0005488//binding	GO:0006950//response to stress
MSTRG.62304	--	2.47	26.48	3.52	0.34	16.07	0.35	0.34	0	0	0.1133	5.5867	10.8233	0.954085236	1	1	-6.577428828	6.27E-05	0.002474461	ORF-c [Brassica rapa]	-	-	-	-
MSTRG.62359	At3g50280	11.92	9.84	10.23	2.04	2.27	1.44	28.44	37.99	33.45	33.2933	1.9167	10.6633	2.475987131	3.09E-41	3.37E-38	1.642574829	1.89E-16	1.51E-13	PREDICTED: uncharacterized acetyltransferase At3g50280-like [Brassica oleracea var. oleracea] [Brassica oleracea]	-	-	GO:0016747//transferase activity, transferring acyl groups other than amino-acyl groups	GO:0009628//response to abiotic stimulus
MSTRG.6240	EXO70A1	0.49	0.41	0.31	1.48	2.69	2.66	0.44	0.25	0.26	0.3167	2.2767	0.4033	-2.496878531	5.48E-05	0.000962101	-0.349007629	0.659345218	0.999767122	exocyst complex component EXO70A1 isoform X1 [Brassica rapa]	-	GO:0005911//cell-cell junction;GO:0009536//plastid;GO:0016020//membrane;GO:0030312//external encapsulating structure;GO:0031988//membrane-bounded vesicle;GO:0035838//growing cell tip;GO:0043232//intracellular non-membrane-bounded organelle;GO:0043234//protein complex	GO:0005488//binding	GO:0006090//pyruvate metabolic process;GO:0006605//protein targeting;GO:0006970//response to osmotic stress;GO:0006996//organelle organization;GO:0009826//unidimensional cell growth;GO:0009914//hormone transport;GO:0010038//response to metal ion;GO:0010101//post-embryonic root morphogenesis;GO:0010192//mucilage biosynthetic process;GO:0022607//cellular component assembly;GO:0042044//fluid transpo…
MSTRG.6241	EXO70A1	0.39	0.51	0.39	1.66	3.98	3	0.16	0.24	0.3	0.2333	2.88	0.43	-2.743660247	2.52E-05	0.000486458	-0.881944238	0.696178803	0.999767122	exocyst complex component EXO70A1 isoform X1 [Brassica rapa]	-	-	-	GO:0016192//vesicle-mediated transport
MSTRG.62667	At1g15757	0	0	0	1.37	1.62	3.49	0	0	0	0	2.16	0	-11.0768156	4.72E-05	0.000845797	0	1	1	Molecular chaperone Hsp40/DnaJ family protein [Arabidopsis thaliana]	-	-	-	-
MSTRG.62959	--	1.43	0.74	0.98	1.33	0.62	1.01	2.13	2.71	1.79	2.21	0.9867	1.05	0.089754653	0.118970456	0.431066272	1.073657042	0.000212783	0.006803193	transmembrane protein [Arabidopsis thaliana]	-	-	-	-
MSTRG.62993	HFR1	0.11	0.23	0.23	1.54	1.27	0.66	0	0	0	0	1.1567	0.19	-2.605901838	0.00129038	0.014076736	-7.569855608	0.030163279	0.279766864	BnaC05g01110D [Brassica napus]	-	GO:0043231//intracellular membrane-bounded organelle;GO:0044444//cytoplasmic part	GO:0000989//transcription factor activity, transcription factor binding;GO:0001071//nucleic acid binding transcription factor activity;GO:0003676//nucleic acid binding;GO:0005515//protein binding	GO:0006779//porphyrin-containing compound biosynthetic process;GO:0007602//phototransduction;GO:0009630//gravitropism;GO:0009755//hormone-mediated signaling pathway;GO:0010017//red or far-red light signaling pathway;GO:0010029//regulation of seed germination;GO:0010099//regulation of photomorphogenesis;GO:0010467//gene expression;GO:0030522//intracellular receptor signaling pathway;GO:0044710//si…
MSTRG.63019	--	2.13	1.49	0.53	0.44	0.39	0.62	2	0.11	0.57	0.8933	0.4833	1.3833	1.517058436	0.005415786	0.045236773	-0.630878336	0.93688828	0.999767122	Harbinger transposase-derived protein [Arabidopsis suecica]	-	-	-	-
MSTRG.63105	CRU4	9286.05	3542.84	5679.76	126.6	40.08	15.43	18253.82	12289.39	11592.22	14045.1433	60.7033	6169.55	6.667245715	1.58E-19	2.74E-17	1.186834178	0.000113632	0.004044361	cruciferin cru4 subunit, partial [Brassica napus]	-	GO:0005783//endoplasmic reticulum	-	GO:0009409//response to cold;GO:0009639//response to red or far red light;GO:0009685//gibberellin metabolic process;GO:0009737//response to abscisic acid;GO:0009756//carbohydrate mediated signaling;GO:0009793//embryo development ending in seed dormancy;GO:0032446//protein modification by small protein conjugation;GO:0048507//meristem development;GO:0048580//regulation of post-embryonic developmen…
MSTRG.63106	CRU4	39.46	4.88	15.06	1.37	0	0.06	86.68	13.21	38.22	46.0367	0.4767	19.8	5.376375879	0.00122716	0.013511953	1.217282947	0.041247109	0.341399786	cruciferin cru4 subunit, partial [Brassica napus]	-	GO:0005783//endoplasmic reticulum	-	GO:0009409//response to cold;GO:0009639//response to red or far red light;GO:0009685//gibberellin metabolic process;GO:0009737//response to abscisic acid;GO:0009756//carbohydrate mediated signaling;GO:0009793//embryo development ending in seed dormancy;GO:0032446//protein modification by small protein conjugation;GO:0048507//meristem development;GO:0048580//regulation of post-embryonic developmen…
MSTRG.63115	FAO1	2.48	1.93	1.7	1.04	1.09	0.8	4.35	3.36	3.59	3.7667	0.9767	2.0367	1.060271715	5.41E-10	2.87E-08	0.887078487	1.34E-07	1.27E-05	PREDICTED: long-chain-alcohol oxidase FAO1 [Brassica oleracea var. oleracea] [Brassica oleracea]	-	-	GO:0016899//oxidoreductase activity, acting on the CH-OH group of donors, oxygen as acceptor	GO:0006950//response to stress;GO:0044281//small molecule metabolic process
MSTRG.63352	At1g06250	0.07	0.4	0.07	2.99	2.79	3.52	0	0.45	0.33	0.26	3.1	0.18	-4.106199404	1.45E-07	4.91E-06	0.530514717	0.454932308	0.999577332	phospholipase A1-IIalpha [Brassica rapa]	-	GO:0009536//plastid	-	GO:0006629//lipid metabolic process
MSTRG.63863	GSTT3	0.42	8.99	0.68	2.15	8.13	2.86	0.14	0.1	0.19	0.1433	4.38	3.3633	-0.381039101	1	1	-4.552445704	0.000864792	0.021103835	PREDICTED: LOW QUALITY PROTEIN: golgin subfamily A member 6-like protein 1 [Brassica oleracea var. oleracea] [Brassica oleracea]	-	GO:0043231//intracellular membrane-bounded organelle	-	-
MSTRG.63892	--	0	0.05	0	1.15	0.77	1.86	0	0	0	0	1.26	0.0167	-6.240314329	5.92E-05	0.001030378	-4.058893689	0.982006263	0.999767122	MULE transposase domain [Arabidopsis suecica]	-	-	-	-
MSTRG.64072	NPF8.3	0.49	0.95	0.77	3.23	2.15	1.95	0	0	0.1	0.0333	2.4433	0.7367	-1.729766829	0.003402247	0.031142882	-4.465974465	0.001838223	0.03786842	protein NRT1/ PTR FAMILY 8.3 [Brassica rapa]	-	-	-	-
MSTRG.64079	NHX8	0.06	0.16	0.07	0.02	0.2	0.03	0.88	1.32	0.06	0.7533	0.0833	0.0967	0.214124805	0.496355826	0.894495099	2.962197967	0.001205899	0.027346482	PREDICTED: sodium/hydrogen exchanger 8 [Brassica oleracea var. oleracea] [Brassica oleracea]	-	GO:0031224//intrinsic component of membrane	GO:0005451//monovalent cation:proton antiporter activity;GO:0046873//metal ion transmembrane transporter activity	GO:0010351//lithium ion transport;GO:0015992//proton transport;GO:0044763//single-organism cellular process
MSTRG.64080	--	14.13	17.84	6.73	5.59	6.96	2.27	24.28	0.07	10.94	11.7633	4.94	12.9	1.384788119	0.000130587	0.002037342	-0.133074136	0.757875666	0.999767122	-	-	-	-	-
MSTRG.64114	BGLU19	6.99	3.9	2.84	0.2	0.15	0.03	30.56	42.51	17.92	30.33	0.1267	4.5767	5.175188397	1.03E-19	1.83E-17	2.728376373	6.78E-10	1.22E-07	LOW QUALITY PROTEIN: beta-glucosidase 19-like [Brassica rapa]	ko01100//Metabolic pathways;ko01110//Biosynthesis of secondary metabolites;ko00940//Phenylpropanoid biosynthesis;ko00500//Starch and sucrose metabolism;ko00460//Cyanoamino acid metabolism	GO:0005911//cell-cell junction;GO:0009526//plastid envelope;GO:0042579//microbody;GO:0044432//endoplasmic reticulum part	GO:0005543//phospholipid binding;GO:0008422//beta-glucosidase activity;GO:0016791//phosphatase activity;GO:0019899//enzyme binding;GO:0046914//transition metal ion binding;GO:0046983//protein dimerization activity	GO:0000003//reproduction;GO:0006091//generation of precursor metabolites and energy;GO:0006470//protein dephosphorylation;GO:0006568//tryptophan metabolic process;GO:0006605//protein targeting;GO:0006714//sesquiterpenoid metabolic process;GO:0006873//cellular ion homeostasis;GO:0006996//organelle organization;GO:0009267//cellular response to starvation;GO:0009409//response to cold;GO:0009608//res…
MSTRG.64196	--	0.03	0.03	0	2.86	3.21	1.13	0	0	0	0	2.4	0.02	-6.906890596	3.17E-07	1.00E-05	-4.321928095	0.809500261	0.999767122	BnaC02g24110D [Brassica napus]	ko03420//Nucleotide excision repair;ko03440//Homologous recombination;ko03030//DNA replication;ko03430//Mismatch repair	-	-	-
MSTRG.64292	ABI5	0.84	0.9	1.06	0.26	2.63	0.63	1.79	6.3	1.46	3.1833	1.1733	0.9333	-0.330148602	0.727544171	0.968807624	1.770073906	0.000771548	0.019320487	PREDICTED: protein ABSCISIC ACID-INSENSITIVE 5 [Brassica oleracea var. oleracea] [Brassica oleracea]	ko04075//Plant hormone signal transduction	-	GO:0003677//DNA binding	GO:0003006//developmental process involved in reproduction;GO:0006355//regulation of transcription, DNA-templated;GO:0009628//response to abiotic stimulus;GO:0009755//hormone-mediated signaling pathway;GO:0048580//regulation of post-embryonic development;GO:0048731//system development;GO:0071229//cellular response to acid chemical;GO:0071396//cellular response to lipid;GO:1901701//cellular respon…
MSTRG.64344	NRAMP6	39.3	30.56	32.47	14.3	16.75	15.13	29.29	27.41	35.7	30.8	15.3933	34.11	1.147889083	4.76E-27	1.58E-24	-0.147264404	0.06233635	0.437046778	PREDICTED: LOW QUALITY PROTEIN: metal transporter Nramp6 [Brassica oleracea var. oleracea] [Brassica oleracea]	-	-	-	GO:0051234//establishment of localization
MSTRG.64424	RFNR2	0.45	0.67	0.89	2.16	2.56	2.85	0.08	0.15	0.87	0.3667	2.5233	0.67	-1.913097799	0.000770114	0.009107301	-0.869691978	0.789382998	0.999767122	ferredoxin--NADP reductase, root isozyme 2, chloroplastic [Brassica napus]	ko01100//Metabolic pathways;ko00195//Photosynthesis	GO:0009536//plastid	GO:0016731//oxidoreductase activity, acting on iron-sulfur proteins as donors, NAD or NADP as acceptor;GO:0046914//transition metal ion binding	GO:0044237//cellular metabolic process;GO:0044710//single-organism metabolic process
MSTRG.64469	--	0.25	0.12	0.54	1.39	2.29	3.24	0	0	0.09	0.03	2.3067	0.3033	-2.926833587	0.000308478	0.004219346	-3.337869639	0.095678575	0.553255862	Harbinger transposase-derived protein [Arabidopsis thaliana x Arabidopsis arenosa]	-	-	-	-
MSTRG.64526	--	1.92	2.52	1.41	0.19	1.42	0.44	2.46	5.98	1.96	3.4667	0.6833	1.95	1.512812715	0.00325715	0.030113969	0.830074999	0.014865277	0.175618595	At1g17830 [Arabidopsis thaliana]	-	GO:0043231//intracellular membrane-bounded organelle	-	-
MSTRG.64634	--	1.84	0.81	1.72	0.53	0.27	0.26	0.53	0.12	0.15	0.2667	0.3533	1.4567	2.043569015	4.67E-07	1.43E-05	-2.449561375	0.013918817	0.167976289	subtilisin-like protease SBT1.3 [Brassica napus]	-	-	-	-
MSTRG.64674	--	1.32	0.43	2.51	11.43	6.55	7.83	0.11	0	0	0.0367	8.6033	1.42	-2.599004806	0.002127939	0.021229678	-5.275278002	0.011422521	0.147017788	transmembrane protein [Arabidopsis thaliana]	-	-	-	-
MSTRG.64695	At4g11580	0	0	0	0.05	2.04	0.75	0	0	0	0	0.9467	0	-9.886712714	0.001246544	0.013681076	0	1	1	BnaA09g10910D [Brassica napus]	-	-	-	-
MSTRG.64838	--	9.84	5.16	0.06	0.07	0.26	0.05	8.68	0.5	1.55	3.5767	0.1267	5.02	5.308578541	3.05E-05	0.000576268	-0.489071694	0.985572674	0.999767122	PREDICTED: L-type lectin-domain containing receptor kinase I.7-like [Brassica oleracea var. oleracea] [Brassica oleracea]	-	-	-	-
MSTRG.6491	--	0.4	3.6	0	0.09	0	0	0	0.62	0.55	0.39	0.03	1.3333	5.473931188	0.004984048	0.042326513	-1.77349147	0.57726698	0.999767122	Integrase catalytic core [Arabidopsis suecica]	-	-	-	-
MSTRG.64935	--	57.59	51.66	22.5	17.16	23.08	6.53	54.71	0.53	36.98	30.74	15.59	43.9167	1.494147628	5.40E-05	0.000950194	-0.514651391	0.989068024	0.999767122	-	-	-	-	-
MSTRG.64948	--	0.04	0.4	0.04	4.07	1.88	4.19	0	0	0	0	3.38	0.16	-4.400879436	1.82E-05	0.000367622	-7.321928095	0.215145145	0.795679121	protein ALP1-like isoform X1 [Brassica rapa]	-	-	-	-
MSTRG.64993	At1g23500	0.58	0.44	2.31	0.28	0.32	0.12	0.23	0.44	0.74	0.47	0.24	1.11	2.209453366	0.001617434	0.016965093	-1.239827015	0.502217265	0.999767122	PREDICTED: GDSL esterase/lipase At1g23500 [Raphanus sativus]	-	-	GO:0016788//hydrolase activity, acting on ester bonds	-
MSTRG.65065	--	0.8	1.29	0.32	5.17	43.22	5.75	0	0	0	0	18.0467	0.8033	-4.489589836	7.48E-05	0.001261136	-9.64985493	0.026214159	0.257164655	BnaC05g18950D [Brassica napus]	-	-	-	-
MSTRG.65157	--	0.58	0.72	0.07	0.09	0.26	0.13	1.8	8.63	1.21	3.88	0.16	0.4567	1.513069582	0.060585338	0.276316353	3.08684326	0.001592083	0.033754876	EamA domain [Arabidopsis thaliana x Arabidopsis arenosa]	-	-	-	GO:0009628//response to abiotic stimulus;GO:0009814//defense response, incompatible interaction
MSTRG.65223	At5g27750	0.62	1.33	1.12	3.18	4.91	3.37	0.17	0.26	0.3	0.2433	3.82	1.0233	-1.900296483	0.000431619	0.00560651	-2.072270286	0.013554456	0.165164385	PREDICTED: FBD-associated F-box protein At5g27750-like [Brassica oleracea var. oleracea] [Brassica oleracea]	-	-	-	GO:0000338//protein deneddylation;GO:0006355//regulation of transcription, DNA-templated;GO:0007126//meiotic nuclear division;GO:0009639//response to red or far red light;GO:0016570//histone modification;GO:0032446//protein modification by small protein conjugation;GO:0042221//response to chemical;GO:0048518//positive regulation of biological process;GO:1903046//meiotic cell cycle process
MSTRG.65408	--	5.77	4.74	2.45	0.1	0.19	0.01	17.82	6.95	6.93	10.5667	0.1	4.32	5.432959407	1.48E-19	2.59E-17	1.290417122	0.000584125	0.015374144	PREDICTED: uncharacterized mitochondrial protein AtMg00810-like [Brassica oleracea var. oleracea] [Brassica oleracea]	-	-	-	-
MSTRG.65423	--	0.4	0.43	0.63	0	0.13	0.04	0.3	0.9	0.62	0.6067	0.0567	0.4867	3.102361718	0.000419272	0.005467261	0.317970081	0.226132099	0.810548059	cell growth defect protein [Arabidopsis thaliana]	-	GO:0031224//intrinsic component of membrane	-	-
MSTRG.65465	XYLA	4.63	0.95	3.23	2	0.71	0.91	4.17	1.24	3.33	2.9133	1.2067	2.9367	1.283152322	0.004137267	0.036464332	-0.011508739	0.457685758	0.999767122	BnaC05g13980D [Brassica napus]	ko04141//Protein processing in endoplasmic reticulum	GO:0030120//vesicle coat	GO:0046914//transition metal ion binding	GO:0006006//glucose metabolic process;GO:0006970//response to osmotic stress;GO:0006996//organelle organization;GO:0015031//protein transport;GO:0016192//vesicle-mediated transport;GO:0016482//cytoplasmic transport;GO:0032989//cellular component morphogenesis;GO:0040007//growth;GO:0070838//divalent metal ion transport
MSTRG.65542	--	0.13	0.21	0.09	0.68	2.86	0.88	0	0.12	0.06	0.06	1.4733	0.1433	-3.361637805	0.000489786	0.006247752	-1.256339753	0.616449868	0.999767122	BnaC05g22010D [Brassica napus]	ko03420//Nucleotide excision repair;ko03440//Homologous recombination;ko03030//DNA replication;ko03430//Mismatch repair	GO:0005911//cell-cell junction	-	-
MSTRG.65624	--	3.11	3.86	3.25	1.66	1.58	1.85	4.55	6.22	5.08	5.2833	1.6967	3.4067	1.005657635	3.47E-06	8.63E-05	0.633087644	0.000979205	0.023246816	hypothetical protein F2Q68_00026437 [Brassica cretica]	-	-	-	-
MSTRG.65626	--	9.44	5.39	2.61	0	0.44	0	15.15	12.13	9.78	12.3533	0.1467	5.8133	5.308752706	2.12E-12	1.60E-10	1.087462841	0.011063862	0.14389755	hypothetical protein F2Q70_00022476 [Brassica cretica]	-	-	-	-
MSTRG.65629	--	5.42	4.69	12.01	35.35	21.43	35.66	2.18	0.91	2.44	1.8433	30.8133	7.3733	-2.063165874	0.000819479	0.009594952	-2	0.018696341	0.205080528	BnaC09g43340D [Brassica napus]	-	-	-	-
MSTRG.65817	--	4.03	7.74	5.73	29.2	10.05	33.45	0.04	0	0.31	0.1167	24.2333	5.8333	-2.054600442	0.002785379	0.026524459	-5.64385619	5.54E-08	6.00E-06	protein ALP1-like isoform X1 [Brassica rapa]	-	-	-	-
MSTRG.65902	dVPE	54.41	79.81	88.17	257.71	186.28	572.7	15.47	3.24	10.41	9.7067	338.8967	74.13	-2.19271603	0.000459974	0.005919887	-2.933009657	2.44E-05	0.001111037	vacuolar-processing enzyme delta-isozyme isoform X1 [Brassica napus]	-	GO:0005618//cell wall;GO:0005773//vacuole;GO:0009536//plastid;GO:0044421//extracellular region part	GO:0004175//endopeptidase activity	GO:0003006//developmental process involved in reproduction;GO:0006950//response to stress;GO:0008219//cell death;GO:0009685//gibberellin metabolic process;GO:0010260//organ senescence;GO:0010476//gibberellin mediated signaling pathway;GO:0016192//vesicle-mediated transport;GO:0016485//protein processing;GO:0061024//membrane organization
MSTRG.65977	--	1.75	1.4	2.44	0.41	0.5	0.33	1.12	1.8	2.89	1.9367	0.4133	1.8633	2.172508162	1.04E-08	4.42E-07	0.055689881	0.245176608	0.835875067	PREDICTED: glycine, alanine and asparagine-rich protein-like [Raphanus sativus]	-	-	-	-
MSTRG.65983	--	1.17	1.92	3.5	1.41	5.05	5.55	3.26	7.43	8.73	6.4733	4.0033	2.1967	-0.865885781	0.695467207	0.960992109	1.55919283	0.00042015	0.011867677	PREDICTED: myosin heavy chain, skeletal muscle [Raphanus sativus]	-	-	-	-
MSTRG.66036	--	3.8	3.19	1.93	6.79	5.81	6.47	0.71	0.07	0.24	0.34	6.3567	2.9733	-1.096189228	0.103852287	0.394469728	-3.128474558	0.001080767	0.025074401	hypothetical protein IGI04_015347 [Brassica rapa subsp. trilocularis] [Brassica rapa]	-	-	-	-
MSTRG.66134	--	1.16	2.02	0.62	3.69	3.95	4.65	0.07	0.06	0.06	0.0633	4.0967	1.2667	-1.693413592	0.007618072	0.059590516	-4.321928095	0.000935135	0.022510134	BnaC06g03220D [Brassica napus]	-	-	-	-
MSTRG.66155	--	8.89	8.02	8.59	2.37	3.9	2.33	11.95	18.68	10.41	13.68	2.8667	8.5	1.568088682	1.54E-14	1.50E-12	0.686533484	0.000644954	0.016747822	hypothetical protein F2Q69_00031452 [Brassica cretica]	-	-	-	-
MSTRG.6632	--	4.18	5.77	3.98	0.29	0.66	0.19	10.31	16.69	11.17	12.7233	0.38	4.6433	3.611089528	1.03E-14	1.03E-12	1.454243929	2.35E-07	2.07E-05	LOW QUALITY PROTEIN: pentatricopeptide repeat-containing protein At3g14330 [Arabidopsis lyrata subsp. lyrata] [Arabidopsis lyrata]	-	-	-	-
MSTRG.66342	argS	6.47	6.22	4.71	0	0	0	29.66	43.09	32.15	34.9667	0	5.8	12.50183718	2.43E-21	4.98E-19	2.591855467	2.36E-23	7.69E-20	arginine--tRNA ligase, cytoplasmic-like isoform X1 [Zingiber officinale]	ko00970//Aminoacyl-tRNA biosynthesis	-	-	-
MSTRG.66353	--	1.49	1.3	5.67	20.38	5.95	33.58	0.57	0.3	0.56	0.4767	19.97	2.82	-2.824067265	0.004252911	0.037255609	-2.564642516	0.020046372	0.214641555	BnaC09g43340D [Brassica napus]	-	-	-	-
MSTRG.66354	--	0.2	0.46	0.43	1.87	1.1	2.1	0.05	0	0.07	0.04	1.69	0.3633	-2.217657612	0.005808354	0.047778504	-3.183221824	0.053559291	0.399755176	BnaC09g43340D [Brassica napus]	-	-	-	-
MSTRG.66386	N6amt1	0.69	1.16	0.97	2.64	3.12	2.96	0.53	0.32	0.21	0.3533	2.9067	0.94	-1.628632972	0.00073601	0.008773584	-1.411630898	0.192082985	0.760122011	BnaC05g39940D [Brassica napus]	-	-	GO:0008168//methyltransferase activity	GO:0008213//protein alkylation
MSTRG.66390	--	1.84	0.5	0.89	0.25	0	0.14	0.84	0.63	0.9	0.79	0.13	1.0767	3.049988136	0.000251695	0.003557803	-0.446647106	0.863625165	0.999767122	-	-	-	-	-
MSTRG.66576	--	0	0.34	0.11	1.57	27.83	6.03	0	0	0	0	11.81	0.15	-6.298902654	1.83E-06	4.86E-05	-7.22881869	0.324540522	0.920516571	BnaA01g25930D [Brassica napus]	-	-	-	-
MSTRG.66593	CESA3	3.65	1.02	2.55	0.6	0.36	0.42	0.68	0.15	0.66	0.4967	0.46	2.4067	2.38733057	2.57E-09	1.23E-07	-2.276686506	0.016960563	0.192631311	cellulose synthase A catalytic subunit 3 [UDP-forming]-like isoform X1 [Brassica rapa]	-	GO:0005911//cell-cell junction;GO:0031224//intrinsic component of membrane;GO:0031984//organelle subcompartment;GO:0043231//intracellular membrane-bounded organelle	GO:0016759//cellulose synthase activity;GO:0046914//transition metal ion binding	GO:0000281//mitotic cytokinesis;GO:0006090//pyruvate metabolic process;GO:0006109//regulation of carbohydrate metabolic process;GO:0006694//steroid biosynthetic process;GO:0006970//response to osmotic stress;GO:0006996//organelle organization;GO:0007275//multicellular organism development;GO:0009699//phenylpropanoid biosynthetic process;GO:0009746//response to hexose;GO:0009826//unidimensional ce…
MSTRG.66633	--	1.91	1.71	1.92	7.9	0.35	3.99	0.23	0.31	0.22	0.2533	4.08	1.8467	-1.143645677	0.559936036	0.92551692	-2.865814653	3.42E-06	0.000211631	Harbinger transposase-derived protein [Arabidopsis thaliana x Arabidopsis arenosa]	-	-	-	-
MSTRG.66825	--	0.7	0.87	0	0	0	0	2.77	2.5	1.85	2.3733	0	0.5233	9.031586343	0.001759992	0.018152144	2.181112682	0.016688386	0.19063011	hypothetical protein HID58_013684 [Brassica napus]	-	-	-	-
MSTRG.66826	SAE1A	30.44	41.74	9.03	0.09	0.38	0.16	294.04	287.94	170.61	250.8633	0.21	27.07	7.010161749	1.86E-30	9.25E-28	3.212134826	3.60E-10	6.94E-08	BnaAnng25940D, partial [Brassica napus]	ko04120//Ubiquitin mediated proteolysis	-	-	-
MSTRG.66827	--	2.8	3.52	0.48	0	0.03	0	41.6	46.96	15.92	34.8267	0.01	2.2667	7.824428435	5.29E-10	2.82E-08	3.941548245	2.50E-09	3.93E-07	BnaC02g23500D [Brassica napus]	ko03420//Nucleotide excision repair;ko03440//Homologous recombination;ko03030//DNA replication;ko03430//Mismatch repair	-	-	-
MSTRG.66960	--	0	0	0	0.32	4.5	1.1	0	0	0	0	1.9733	0	-10.94641896	0.000438987	0.005688556	0	1	1	sporozoite surface protein 2 [Arabidopsis lyrata subsp. lyrata] [Arabidopsis lyrata]	-	-	-	-
MSTRG.67089	At5g60610	0.9	0.41	0.37	0.19	0.03	0.13	0.69	0.23	0.14	0.3533	0.1167	0.56	2.263034406	0.000743087	0.008840192	-0.664396968	0.925336683	0.999767122	BnaAnng21920D [Brassica napus]	-	-	-	-
MSTRG.67100	At2g46260	0.68	0.72	0.63	0.21	0.21	0.2	0.31	0.52	0.18	0.3367	0.2067	0.6767	1.711139607	1.50E-07	5.06E-06	-1.007124434	0.529672958	0.999767122	BnaC04g11990D [Brassica napus]	-	GO:0043231//intracellular membrane-bounded organelle	GO:0046983//protein dimerization activity	GO:0003002//regionalization;GO:0003006//developmental process involved in reproduction;GO:0009639//response to red or far red light
MSTRG.67169	--	5.04	3.21	8	1.86	1.87	3.76	1.94	1.84	1.9	1.8933	2.4967	5.4167	1.117402094	0.000421978	0.005496646	-1.516476883	0.044407038	0.357199246	GDSL esterase/lipase At2g03980-like [Brassica napus]	-	-	-	-
MSTRG.67225	At4g38940	0	0.06	0	0.08	1.76	0.96	0	0	0	0	0.9333	0.02	-5.544320516	0.003292122	0.030371218	-4.321928095	0.806782592	0.999767122	PREDICTED: F-box/kelch-repeat protein At4g38940-like [Brassica oleracea var. oleracea] [Brassica oleracea]	-	-	-	-
MSTRG.67385	--	7.87	4.53	2.91	1.15	2.69	0.32	2.92	0	0.7	1.2067	1.3867	5.1033	1.879818849	0.001644557	0.017207101	-2.08041268	0.208029837	0.784675599	-	-	-	-	-
MSTRG.67395	PBL1	0.33	0.4	0.18	4.52	2.48	2.55	0	0	0.12	0.04	3.1833	0.3033	-3.391562283	2.47E-08	9.71E-07	-2.922832139	0.196374763	0.766541198	BnaC03g44910D [Brassica napus]	-	GO:0016020//membrane;GO:0043231//intracellular membrane-bounded organelle;GO:0043232//intracellular non-membrane-bounded organelle	GO:0016301//kinase activity	GO:0006468//protein phosphorylation;GO:0007165//signal transduction;GO:0009620//response to fungus;GO:0009719//response to endogenous stimulus;GO:0010033//response to organic substance;GO:0043067//regulation of programmed cell death;GO:0044765//single-organism transport;GO:0052166//positive regulation by symbiont of host innate immune response;GO:0071702//organic substance transport
MSTRG.67396	YUC10	2.27	1.51	1.32	0.07	0.33	0	0.33	0	0.25	0.1933	0.1333	1.7	3.672425342	2.96E-05	0.000560157	-3.136372442	0.007026041	0.103764716	BnaAnng35650D, partial [Brassica napus]	-	-	-	-
MSTRG.67438	--	6.93	5.58	5.65	14.87	11.68	16.92	4.16	3.86	3.71	3.91	14.49	6.0533	-1.259255893	0.004370407	0.038061234	-0.630561189	0.87497585	0.999767122	hypothetical protein F2Q69_00046608 [Brassica cretica]	-	-	-	-
MSTRG.67468	LOL1	0.48	0.5	0.65	4.13	2.88	3.98	0.03	0.04	0.3	0.1233	3.6633	0.5433	-2.753247517	2.26E-10	1.26E-08	-2.139274789	0.135841506	0.654137377	PREDICTED: protein LOL1 [Brassica oleracea var. oleracea] [Brassica oleracea]	-	GO:0043231//intracellular membrane-bounded organelle	GO:0003676//nucleic acid binding	GO:0010363//regulation of plant-type hypersensitive response;GO:0019430//removal of superoxide radicals;GO:0030154//cell differentiation
MSTRG.67491	--	0	0	0	0.66	0.82	1.14	0	0	0	0	0.8733	0	-9.770388596	0.004065593	0.035993137	0	1	1	defensin-like protein 50 [Arabidopsis lyrata subsp. lyrata] [Arabidopsis lyrata]	-	-	-	-
MSTRG.67518	--	3.99	3.01	3.63	1.41	1.25	1.13	2.92	2.31	2.99	2.74	1.2633	3.5433	1.487871843	8.97E-17	1.12E-14	-0.370931298	0.451020011	0.998026935	unnamed protein product [Brassica napus]	-	-	-	-
MSTRG.67520	RNF217	8.95	8.32	7.84	3.16	3.07	1.8	7.09	6.25	7	6.78	2.6767	8.37	1.644790136	2.40E-19	4.08E-17	-0.303942349	0.121654384	0.623579223	probable E3 ubiquitin-protein ligase RNF217 [Brassica rapa]	-	-	-	GO:0048444//floral organ morphogenesis
MSTRG.67558	--	0.5	0.71	1.2	2.75	2.34	4.41	0.18	0.77	0.57	0.5067	3.1667	0.8033	-1.978894367	0.002312321	0.02276189	-0.664961823	0.952784366	0.999767122	BnaA08g28590D [Brassica napus]	-	-	-	-
MSTRG.67562	LCR82	0.42	0.61	0.68	2.97	8.01	3.65	0.16	0.19	0.58	0.31	4.8767	0.57	-3.096861539	5.40E-05	0.000949354	-0.878693704	0.756205661	0.999767122	low-molecular-weight cysteine-rich 46 [Arabidopsis thaliana]	-	-	-	-
MSTRG.67768	--	1.31	1.66	2.57	0.49	0.46	0.34	0.66	0.64	0.99	0.7633	0.43	1.8467	2.102514911	0.000130096	0.002031179	-1.274538378	0.358384053	0.944842684	cadmium tolerance 1 [Arabidopsis thaliana]	-	-	-	-
MSTRG.6777	ASK4	1.02	0.22	0.1	0	0.06	0.03	2.63	0.96	0.79	1.46	0.03	0.4467	3.896164189	0.001519577	0.016139726	1.708697869	0.025166944	0.25014585	PREDICTED: SCF ubiquitin ligase complex protein SKP1a-like isoform X1 [Brassica oleracea var. oleracea] [Brassica oleracea]	ko04141//Protein processing in endoplasmic reticulum;ko04120//Ubiquitin mediated proteolysis	GO:0015630//microtubule cytoskeleton;GO:0016020//membrane;GO:0031461//cullin-RING ubiquitin ligase complex;GO:0043231//intracellular membrane-bounded organelle;GO:0044444//cytoplasmic part	GO:0005488//binding;GO:0016772//transferase activity, transferring phosphorus-containing groups	GO:0000018//regulation of DNA recombination;GO:0000160//phosphorelay signal transduction system;GO:0001558//regulation of cell growth;GO:0003006//developmental process involved in reproduction;GO:0006511//ubiquitin-dependent protein catabolic process;GO:0006796//phosphate-containing compound metabolic process;GO:0007017//microtubule-based process;GO:0007126//meiotic nuclear division;GO:0009755//h…
MSTRG.67939	--	8.77	2.27	0.78	0.9	0.35	0.3	8.07	0.1	1.18	3.1167	0.5167	3.94	2.930889915	0.000169232	0.002540451	-0.338191765	0.901891493	0.999767122	BnaC03g71320D [Brassica napus]	-	-	-	-
MSTRG.67954	--	1.68	1.26	0.07	0.08	0.17	0.06	3.93	0.08	0.09	1.3667	0.1033	1.0033	3.279423366	0.003077283	0.028840947	0.445860423	0.563436055	0.999767122	hypothetical protein F2Q69_00018206 [Brassica cretica]	-	-	-	-
MSTRG.67956	--	1.36	0.93	0.16	0	0	0.02	4.07	0	0.2	1.4233	0.0067	0.8167	6.936637939	0.004141851	0.036489597	0.801454321	0.452824196	0.99844834	hypothetical protein IGI04_042261 [Brassica rapa subsp. trilocularis] [Brassica rapa]	-	-	-	-
MSTRG.67993	--	1	0.64	0.32	2.58	39.36	8.65	0	0	0.14	0.0467	16.8633	0.6533	-4.68992668	5.81E-05	0.001014027	-3.807354922	0.0703476	0.468872686	BnaA05g14090D [Brassica napus]	-	-	-	-
MSTRG.68106	At2g39360	0.35	0.63	0.53	1.44	1.8	1.8	0.08	0.16	0.23	0.1567	1.68	0.5033	-1.738875184	0.001806846	0.018535443	-1.683815888	0.134177203	0.650856943	BnaAnng27910D [Brassica napus]	-	GO:0031224//intrinsic component of membrane	GO:0004713//protein tyrosine kinase activity;GO:0032550//purine ribonucleoside binding	GO:0001101//response to acid chemical;GO:0001558//regulation of cell growth;GO:0006468//protein phosphorylation;GO:0015698//inorganic anion transport
MSTRG.68215	--	2.81	5.98	5.26	23.31	67.27	15	0.93	1.11	2.44	1.4933	35.1933	4.6833	-2.909694536	0.000221021	0.003191891	-1.648999493	0.103044339	0.576168135	BnaA05g36870D [Brassica napus]	-	-	-	-
MSTRG.68302	NOB1	0.5	0.92	0.63	7.7	3.06	12.56	0.3	0.3	0.19	0.2633	7.7733	0.6833	-3.507871974	2.94E-06	7.44E-05	-1.375699351	0.311733589	0.908395737	20S-pre-rRNA D-site endonuclease nob1-like [Brassica rapa]	ko03008//Ribosome biogenesis in eukaryotes	-	-	-
MSTRG.68334	MBD4L	0.93	0.6	0.8	0.25	0.54	0.35	0.75	0.05	0.41	0.4033	0.38	0.7767	1.03129613	0.00270497	0.025892214	-0.945322907	0.668802029	0.999767122	methyl-CpG-binding domain protein 4-like protein isoform X2 [Brassica napus]	ko03410//Base excision repair	GO:0043231//intracellular membrane-bounded organelle	-	GO:0006281//DNA repair;GO:0006305//DNA alkylation
MSTRG.68382	--	2.08	2.85	2.16	2.52	8.8	7.75	0.23	0.09	0.53	0.2833	6.3567	2.3633	-1.427447311	0.107156288	0.402646291	-3.060250881	0.000178253	0.00587688	Zinc finger CCHC-type [Arabidopsis suecica]	-	-	-	-
MSTRG.68446	IDD5	1.9	2.39	2.25	5.36	9.06	6.12	0.54	0.82	0.84	0.7333	6.8467	2.18	-1.651073641	0.000395405	0.005200735	-1.571787112	0.010102857	0.134562656	protein indeterminate-domain 5, chloroplastic isoform X2 [Brassica napus]	-	GO:0009536//plastid	GO:0001071//nucleic acid binding transcription factor activity;GO:0003676//nucleic acid binding;GO:0043169//cation binding	GO:0006351//transcription, DNA-templated;GO:0010468//regulation of gene expression;GO:0080090//regulation of primary metabolic process;GO:2000112//regulation of cellular macromolecule biosynthetic process
MSTRG.68510	NIP5-1	0.33	0.27	0.45	0.11	0.08	0	1.3	1.06	1.21	1.19	0.0633	0.35	2.466318004	0.022148961	0.134244408	1.765534746	0.001243581	0.028029286	NLM8 [Arabidopsis thaliana]	-	-	-	-
MSTRG.68511	--	5.33	0.83	3.94	0.79	0.33	0.86	5.97	0.77	6.74	4.4933	0.66	3.3667	2.350782958	0.00024658	0.003496679	0.416465204	0.318543377	0.914946285	hypothetical protein F2Q68_00036234 [Brassica cretica]	-	-	-	-
MSTRG.68632	--	0.23	0	0	0.31	22.6	2.71	0	0	0	0	8.54	0.0767	-6.799492804	0.000471173	0.006043888	-6.26052755	0.699351204	0.999767122	PREDICTED: LOW QUALITY PROTEIN: thionin-like protein 1 [Camelina sativa]	-	-	-	-
MSTRG.68752	SSL13	0	0.09	0	0.33	5.17	0.34	0	0	0	0	1.9467	0.03	-6.019899557	0.001852715	0.018930575	-4.906890596	0.806782592	0.999767122	PREDICTED: protein STRICTOSIDINE SYNTHASE-LIKE 13 isoform X2 [Brassica oleracea var. oleracea] [Brassica oleracea]	-	-	-	-
MSTRG.68981	LRR-RLK	1.54	2.46	1.55	0.78	0.48	0.44	0.46	0.66	1.44	0.8533	0.5667	1.85	1.706953025	1.23E-08	5.17E-07	-1.116343961	0.510807905	0.999767122	LOW QUALITY PROTEIN: probable leucine-rich repeat receptor-like serine/threonine-protein kinase At3g14840 [Jatropha curcas]	-	-	GO:0004672//protein kinase activity;GO:0032550//purine ribonucleoside binding	GO:0006464//cellular protein modification process;GO:0016310//phosphorylation
MSTRG.69005	--	8.63	7.25	8.08	2.67	2.87	1.81	6.12	8.48	5.79	6.7967	2.45	7.9867	1.704811753	9.48E-19	1.51E-16	-0.232766133	0.267235038	0.862342423	-	-	-	-	-
MSTRG.69022	CP29B	2.72	2.55	3.5	4.28	2.29	4.66	10.77	11.48	8.09	10.1133	3.7433	2.9233	-0.35670918	0.438838803	0.860103656	1.790572338	3.13E-15	1.95E-12	BnaUnng05280D, partial [Brassica napus]	ko03420//Nucleotide excision repair;ko03440//Homologous recombination;ko03030//DNA replication;ko03430//Mismatch repair	-	-	-
MSTRG.69024	--	0.53	1.21	0.26	0.13	1.21	0.28	18.18	24.14	13.56	18.6267	0.54	0.6667	0.304006187	0.406444373	0.829990371	4.804260116	2.54E-17	2.40E-14	replication protein A 70 kDa DNA-binding subunit B-like isoform X2 [Brassica rapa]	ko03420//Nucleotide excision repair;ko03440//Homologous recombination;ko03030//DNA replication;ko03430//Mismatch repair	-	-	-
MSTRG.69026	CP29B	0	0	0.18	0.66	0.59	0.32	20.21	32.71	19.97	24.2967	0.5233	0.06	-3.124695747	0.070803397	0.307047137	8.661580184	2.07E-18	2.79E-15	BnaUnng05280D, partial [Brassica napus]	ko03420//Nucleotide excision repair;ko03440//Homologous recombination;ko03030//DNA replication;ko03430//Mismatch repair	-	-	-
MSTRG.69088	WAK3	0	0.02	0	0	0.06	0	0.09	0.28	0.34	0.2367	0.02	0.0067	-1.584962501	0.833254844	0.987600447	5.14974712	0.000693986	0.017766122	BnaC02g23840D [Brassica napus]	-	-	-	-
MSTRG.69437	--	2.12	1.48	1.97	4.62	5.01	6.87	1.65	1.01	0.72	1.1267	5.5	1.8567	-1.566716792	0.003365313	0.030867533	-0.720654081	0.78400523	0.999767122	hypothetical protein HID58_045784 [Brassica napus]	-	-	-	-
MSTRG.6960	NUDT21	1.26	6.6	0.15	0.18	0.3	0.17	0.8	0.24	0.93	0.6567	0.2167	2.67	3.623290619	0.000432453	0.005615881	-2.023606613	0.249342045	0.843274567	nudix hydrolase 21, chloroplastic [Brassica rapa]	-	GO:0009536//plastid	GO:0052841//inositol bisdiphosphate tetrakisphosphate diphosphatase activity;GO:0052842//inositol diphosphate pentakisphosphate diphosphatase activity	-
MSTRG.69738	--	0.59	0.51	0.38	0.41	0.24	0.17	4.93	1.64	1.89	2.82	0.2733	0.4933	0.851901361	0.004212798	0.036991921	2.515060487	1.03E-07	1.02E-05	Transposon En/Spm-like [Arabidopsis thaliana x Arabidopsis arenosa]	-	-	-	-
MSTRG.69739	--	0.72	0.31	0.37	0.48	0.63	0.6	3.37	2.48	1.61	2.4867	0.57	0.4667	-0.288569498	0.500866055	0.897787349	2.413748803	1.07E-07	1.06E-05	Zinc finger CCHC-type [Arabidopsis suecica]	-	-	-	-
MSTRG.69908	--	0.63	0.75	0.91	0.1	0	0	0.08	0	0	0.0267	0.0333	0.7633	4.517275693	7.08E-05	0.001204399	-4.839203788	0.011076217	0.14392543	BnaC06g31780D [Brassica napus]	-	-	-	GO:0000097//sulfur amino acid biosynthetic process
MSTRG.70007	--	2.04	2.02	2.03	0	0.19	0	6.39	9.36	6.5	7.4167	0.0633	2.03	5.002370904	1.51E-11	9.96E-10	1.869291203	2.97E-12	1.03E-09	BnaA09g29430D [Brassica napus]	-	-	-	-
MSTRG.7020	--	0	0.06	0	0	0.27	0.1	1.56	7.57	0	3.0433	0.1233	0.02	-2.624490865	0.398044968	0.823063068	7.249508549	0.000360597	0.010457564	BnaA06g14370D [Brassica napus]	-	-	-	-
MSTRG.70414	--	3.41	4.07	4.62	9.29	11.14	11.12	2.79	0.96	1.93	1.8933	10.5167	4.0333	-1.382632958	0.000412689	0.005393833	-1.091044213	0.291200237	0.888114118	PREDICTED: protein indeterminate-domain 6, chloroplastic-like [Brassica oleracea var. oleracea] [Brassica oleracea]	-	-	-	-
MSTRG.70721	UGE4	9.17	7.4	10.58	22.71	14.54	17.81	1.21	0.49	1.32	1.0067	18.3533	9.05	-1.020052412	0.105517612	0.398674739	-3.168331743	1.74E-09	2.84E-07	BnaCnng11940D [Brassica napus]	ko01100//Metabolic pathways;ko04145//Phagosome;ko04070//Phosphatidylinositol signaling system;ko00562//Inositol phosphate metabolism	GO:0005794//Golgi apparatus	GO:0005515//protein binding;GO:0016857//racemase and epimerase activity, acting on carbohydrates and derivatives	GO:0009250//glucan biosynthetic process;GO:0010015//root morphogenesis;GO:0010396//rhamnogalacturonan II metabolic process;GO:0042546//cell wall biogenesis;GO:0045229//external encapsulating structure organization
MSTRG.70722	UGE4	0.43	0.4	0.84	1.22	1.91	1.73	0	0	0.07	0.0233	1.62	0.5567	-1.541108211	0.039023869	0.202583229	-4.57634937	0.002012029	0.040636798	BnaCnng11940D [Brassica napus]	ko01100//Metabolic pathways;ko04145//Phagosome;ko04070//Phosphatidylinositol signaling system;ko00562//Inositol phosphate metabolism	-	-	-
MSTRG.70732	MAG	0.44	0.88	1.16	3.32	2.63	3.53	0.42	0.56	0.26	0.4133	3.16	0.8267	-1.934546939	0.00132413	0.014382143	-1	0.580263053	0.999767122	DNA-3-methyladenine glycosylase-like [Brassica napus]	ko03410//Base excision repair	GO:0043231//intracellular membrane-bounded organelle	GO:0043733//DNA-3-methylbase glycosylase activity	GO:0006281//DNA repair
MSTRG.70781	dVPE	0.84	3.15	1.6	5.87	9.83	27.09	0.45	0.25	0.33	0.3433	14.2633	1.8633	-2.936353491	0.000689771	0.008313306	-2.440203946	0.010170917	0.135225877	PREDICTED: vacuolar-processing enzyme delta-isozyme-like [Brassica oleracea var. oleracea] [Brassica oleracea]	-	GO:0005618//cell wall;GO:0009536//plastid;GO:0044421//extracellular region part	GO:0004175//endopeptidase activity	GO:0003006//developmental process involved in reproduction;GO:0008219//cell death;GO:0009685//gibberellin metabolic process;GO:0010476//gibberellin mediated signaling pathway;GO:0016485//protein processing;GO:0044707//single-multicellular organism process
MSTRG.70790	--	5.4	4.62	4.94	1.27	2.67	0.91	7.63	13.14	7.68	9.4833	1.6167	4.9867	1.625053523	1.35E-07	4.61E-06	0.927318477	6.15E-05	0.002432141	unnamed protein product [Brassica napus]	-	-	-	-
MSTRG.70822	--	0.67	0.9	0.5	0.28	0.42	0.22	2.04	4.11	0.92	2.3567	0.3067	0.69	1.169925001	0.000874659	0.010121101	1.772079447	0.00067687	0.017399068	LOW QUALITY PROTEIN: BEL1-like homeodomain protein 2 [Brassica napus]	-	-	-	-
MSTRG.70831	--	0	0	0	0.32	2.5	0.56	0	0	0	0	1.1267	0	-10.13784503	0.000116053	0.001850559	0	1	1	BnaC07g03200D [Brassica napus]	-	GO:0016020//membrane;GO:0043231//intracellular membrane-bounded organelle	GO:0022891//substrate-specific transmembrane transporter activity	GO:0006812//cation transport;GO:0015698//inorganic anion transport;GO:0044763//single-organism cellular process
MSTRG.70855	--	0.78	0.55	1.01	0.96	0.68	0.55	2.57	3.66	3.14	3.1233	0.73	0.78	0.09557766	0.139717666	0.473919587	2.001540518	1.54E-08	1.94E-06	hypothetical protein DY000_02020704 [Brassica cretica]	-	-	-	-
MSTRG.70918	SH3P3	0.06	0.16	0.03	3.23	2.05	3.32	0	0	0.04	0.0133	2.8667	0.0833	-5.10433666	5.25E-12	3.74E-10	-2.64385619	0.355895049	0.943382004	BnaC01g27750D [Brassica napus]	ko00910//Nitrogen metabolism	GO:0009536//plastid	GO:0016836//hydro-lyase activity;GO:0046914//transition metal ion binding	GO:0044699//single-organism process
MSTRG.71037	--	0.1	0.48	0.21	3.8	3.32	4.94	0	0	0	0	4.02	0.2633	-3.932233444	1.68E-06	4.51E-05	-8.040746342	0.274914792	0.871183464	unnamed protein product [Brassica napus]	-	-	-	-
MSTRG.71058	--	0.65	1.32	0.85	0.25	0.15	0.01	0.15	0	0.11	0.0867	0.1367	0.94	2.781999348	3.30E-05	0.000616257	-3.439111634	0.001323896	0.029472172	BnaC04g55630D [Brassica napus]	-	-	-	-
MSTRG.71179	--	4.29	4.95	6.45	16.48	9.95	16.9	0.95	1.02	0.72	0.8967	14.4433	5.23	-1.465520884	0.006249734	0.050687979	-2.544167274	4.76E-06	0.000279631	hypothetical protein F2Q70_00008886 [Brassica cretica]	-	-	-	-
MSTRG.71186	--	0.07	0	0	1.29	1.05	0.55	0	0	0	0	0.9633	0.0233	-5.36757076	0.001764217	0.018177123	-4.544320516	0.982006263	0.999767122	hypothetical protein F2Q70_00037087 [Brassica cretica]	-	-	-	-
MSTRG.71207	At1g13609	5.59	11.05	3.59	56.64	84.91	13.54	3	2.03	2.36	2.4633	51.6967	6.7433	-2.938537441	0.000590383	0.007350036	-1.45285005	0.123088005	0.62736501	defensin-like protein 287 [Brassica rapa]	-	GO:0043231//intracellular membrane-bounded organelle	-	GO:0051704//multi-organism process
MSTRG.71325	--	1.69	0.92	2.16	0.51	0.32	0.27	1.73	2.22	2.07	2.0067	0.3667	1.59	2.116485742	6.87E-08	2.49E-06	0.335774221	0.046409868	0.366227556	alpha-ketoglutarate-dependent dioxygenase alkB [Brassica napus]	-	-	-	-
MSTRG.71346	HDG12	0.8	1.55	2.18	4.17	4.9	4.69	0.17	0.21	0.41	0.2633	4.5867	1.51	-1.602897515	0.008477898	0.064650058	-2.519586492	0.002565258	0.048762651	BnaCnng65280D [Brassica napus]	-	GO:0043231//intracellular membrane-bounded organelle	GO:0001071//nucleic acid binding transcription factor activity;GO:0004177//aminopeptidase activity;GO:0043169//cation binding;GO:0044212//transcription regulatory region DNA binding	GO:0000904//cell morphogenesis involved in differentiation;GO:0006498//N-terminal protein lipidation;GO:0006508//proteolysis;GO:0009409//response to cold;GO:0009814//defense response, incompatible interaction;GO:0009827//plant-type cell wall modification;GO:0010467//gene expression
MSTRG.71414	--	13.09	10.71	8.6	4.39	5.65	2.95	12.21	15.57	13.22	13.6667	4.33	10.8	1.318592382	2.13E-10	1.19E-08	0.339630097	0.002303291	0.044932425	BnaA10g12550D [Brassica napus]	-	-	-	-
MSTRG.71415	--	9.26	6.63	9.27	5.09	2.09	3.09	14.28	13.92	12.2	13.4667	3.4233	8.3867	1.292695741	6.82E-07	2.01E-05	0.683223371	7.00E-06	0.000389675	BnaA10g12550D [Brassica napus]	-	-	-	-
MSTRG.71442	PHL2	0.61	0.87	0.29	0.16	0.09	0.1	0.63	0.79	0.16	0.5267	0.1167	0.59	2.338322533	3.00E-05	0.000568136	-0.163824802	0.590629743	0.999767122	PREDICTED: LOW QUALITY PROTEIN: myb family transcription factor APL [Brassica oleracea var. oleracea] [Brassica oleracea]	-	GO:0043231//intracellular membrane-bounded organelle	GO:0001071//nucleic acid binding transcription factor activity;GO:0005488//binding	GO:0000097//sulfur amino acid biosynthetic process;GO:0008380//RNA splicing;GO:0009409//response to cold;GO:0009566//fertilization;GO:0009648//photoperiodism;GO:0010468//regulation of gene expression
MSTRG.71485	--	110.74	101.05	183.97	33.34	32.23	28.21	84.36	96.02	128.87	103.0833	31.26	131.92	2.07727362	3.64E-23	8.73E-21	-0.355852209	0.518409741	0.999767122	hypothetical protein F2Q69_00049377 [Brassica cretica]	-	-	-	-
MSTRG.71573	--	0	0	0	0.63	0.4	2.12	0.13	0	0	0.0433	1.05	0	-10.03617361	0.000418668	0.005460219	5.437405312	0.539957138	0.999767122	unnamed protein product [Brassica oleracea]	-	-	-	-
MSTRG.71674	--	0.33	0.03	0.1	7	1.82	12.3	0.05	0	0.13	0.06	7.04	0.1533	-5.520832163	1.50E-07	5.08E-06	-1.353636955	0.628223969	0.999767122	Harbinger transposase-derived protein [Arabidopsis thaliana x Arabidopsis arenosa]	-	-	-	-
MSTRG.71681	RFK1	1.25	1.15	1.22	0.99	0.64	0.75	0.15	0.16	0.36	0.2233	0.7933	1.2067	0.605028124	1.12E-05	0.000240036	-2.433756697	0.000798087	0.019834054	probable LRR receptor-like serine/threonine-protein kinase At1g29720 [Brassica napus]	-	-	-	-
MSTRG.71727	--	6.82	6.89	9.08	5.63	1.91	3.85	1.58	0.51	1.31	1.1333	3.7967	7.5967	1.000633178	8.43E-05	0.001398558	-2.744794273	2.07E-06	0.000137252	Harbinger transposase-derived protein [Arabidopsis suecica]	-	-	-	-
MSTRG.71745	--	0.49	0.39	0.66	2.29	1.88	2.29	0.11	0	0.12	0.0767	2.1533	0.5133	-2.068603814	0.000192089	0.002825187	-2.743224585	0.055502468	0.408472085	hypothetical protein F2Q69_00054143 [Brassica cretica]	-	-	-	-
MSTRG.71780	--	0.78	0.05	0.51	0.35	0	0.04	1.73	2.95	2.51	2.3967	0.13	0.4467	1.780686972	0.115332741	0.422297025	2.42375877	0.000679812	0.017447357	probable E3 ubiquitin-protein ligase XERICO [Capsella rubella]	-	-	GO:0046914//transition metal ion binding	-
MSTRG.71844	--	0.07	0.1	0.08	0	0	0	0.6	0	0.61	0.4033	0	0.0833	6.380821784	0.005761588	0.047485742	2.275007047	0.040314915	0.336803976	apoptosis inhibitory protein [Arabidopsis thaliana]	-	-	-	-
MSTRG.71997	PBL21	0.93	0.36	0.34	1.83	0.79	1.32	0	0	0	0	1.3133	0.5433	-1.273323665	0.313424094	0.739989022	-9.085693748	0.00056872	0.015056283	PREDICTED: serine/threonine-protein kinase PBS1-like isoform X2 [Brassica oleracea var. oleracea] [Brassica oleracea]	-	GO:0009526//plastid envelope	GO:0004702//receptor signaling protein serine/threonine kinase activity;GO:0032550//purine ribonucleoside binding	GO:0000904//cell morphogenesis involved in differentiation;GO:0010646//regulation of cell communication;GO:0032147//activation of protein kinase activity
MSTRG.72005	GONST3	0.58	0.24	0.45	2.58	1.96	2.24	0.38	0.05	0.26	0.23	2.26	0.4233	-2.416456776	8.71E-06	0.00019274	-0.88016023	0.699119854	0.999767122	GDP-mannose transporter GONST3-like, partial [Brassica napus]	-	GO:0031224//intrinsic component of membrane;GO:0043231//intracellular membrane-bounded organelle	-	GO:0006862//nucleotide transport
MSTRG.72133	DDM1	0.32	0.65	0.49	3.6	2.33	2.85	0.07	0.02	0.02	0.0367	2.9267	0.4867	-2.588252571	2.23E-08	8.89E-07	-3.73039294	0.000564785	0.015005787	PREDICTED: ATP-dependent DNA helicase DDM1 [Brassica oleracea var. oleracea] [Brassica oleracea]	-	GO:0000785//chromatin;GO:0043231//intracellular membrane-bounded organelle	GO:0003676//nucleic acid binding;GO:0003678//DNA helicase activity;GO:0032550//purine ribonucleoside binding	GO:0006342//chromatin silencing;GO:0009292//genetic transfer;GO:0031062//positive regulation of histone methylation;GO:0032196//transposition;GO:0032392//DNA geometric change;GO:0034968//histone lysine methylation;GO:0035067//negative regulation of histone acetylation;GO:0035194//posttranscriptional gene silencing by RNA;GO:0051052//regulation of DNA metabolic process
MSTRG.72181	--	1.67	0.42	1.82	0.48	0.08	0	0.12	0.03	0.55	0.2333	0.1867	1.3033	2.803669875	0.005477913	0.045612243	-2.48174178	0.075694404	0.487483694	BnaA04g07310D [Brassica napus]	-	-	-	-
MSTRG.7222	--	2.04	1.57	1.67	5.54	4.59	6.91	0.39	0	0.14	0.1767	5.68	1.76	-1.690315501	0.000142434	0.002194378	-3.316473665	0.003078216	0.055908772	transcription factor VIP1-like [Brassica napus]	-	-	-	-
MSTRG.72237	--	0.43	1.11	0.93	0.34	0.11	0.06	0.07	0.08	0.25	0.1333	0.17	0.8233	2.27594189	0.001265965	0.013861995	-2.626439137	0.067508476	0.458504531	-	-	-	-	-
MSTRG.72257	--	3.66	3.52	3.57	1.53	1.12	1	4.8	6.01	8.95	6.5867	1.2167	3.5833	1.558368291	4.21E-17	5.55E-15	0.878246287	3.81E-05	0.001621879	-	-	-	-	-
MSTRG.72310	--	0.4	0.22	0.11	0.02	0	0	6.71	7.71	3.5	5.9733	0.0067	0.2433	5.189824559	6.92E-05	0.00118108	4.617530363	1.46E-17	1.49E-14	defensin-like protein 210 [Arabidopsis lyrata subsp. lyrata] [Arabidopsis lyrata]	-	-	-	-
MSTRG.72312	--	1.22	0.61	0.19	0	0	0	29.47	21.15	17.56	22.7267	0	0.6733	9.395177077	3.94E-08	1.49E-06	5.076921401	1.24E-17	1.30E-14	hypothetical protein DY000_02013129 [Brassica cretica]	-	-	-	-
MSTRG.72478	--	3.64	5.97	0	0.07	0	0	3.93	0.15	0.46	1.5133	0.0233	3.2033	7.101037699	0.000168721	0.002534578	-1.081844133	0.746679339	0.999767122	hypothetical protein F2Q68_00015084 [Brassica cretica]	-	-	-	-
MSTRG.72534	--	0.38	1.21	0.41	0.09	0	0.06	0.54	0.59	0.62	0.5833	0.05	0.6667	3.736965594	0.000875044	0.010124185	-0.192645078	0.502832969	0.999767122	BnaCnng29910D [Brassica napus]	-	-	-	-
MSTRG.72615	--	0	0	0	0	5.72	1.15	0	0	0	0	2.29	0	-11.16113188	0.00477759	0.040898999	0	1	1	Expressed protein [Arabidopsis thaliana]	-	-	-	-
MSTRG.72721	4CL1	67.37	37.53	60.55	30.13	14.31	17.56	91.44	59.32	83.21	77.99	20.6667	55.15	1.416055171	3.69E-08	1.41E-06	0.499928265	0.001570698	0.033466308	PREDICTED: 4-coumarate--CoA ligase 1 [Brassica oleracea var. oleracea] [Brassica oleracea]	ko01100//Metabolic pathways;ko01110//Biosynthesis of secondary metabolites;ko00940//Phenylpropanoid biosynthesis;ko00360//Phenylalanine metabolism;ko00130//Ubiquinone and other terpenoid-quinone biosynthesis	GO:0043231//intracellular membrane-bounded organelle	GO:0016405//CoA-ligase activity;GO:0016703//oxidoreductase activity, acting on single donors with incorporation of molecular oxygen, incorporation of one atom of oxygen (internal monooxygenases or internal mixed function oxidases);GO:0032550//purine ribonucleoside binding	GO:0006575//cellular modified amino acid metabolic process;GO:0006595//polyamine metabolic process;GO:0006605//protein targeting;GO:0006950//response to stress;GO:0009416//response to light stimulus;GO:0009699//phenylpropanoid biosynthetic process;GO:0009891//positive regulation of biosynthetic process;GO:0043067//regulation of programmed cell death;GO:0051707//response to other organism
MSTRG.72722	4CL1	2.34	0.96	2.11	0.59	0.78	0.68	1.59	0.85	1.61	1.35	0.6833	1.8033	1.400004684	1.71E-06	4.58E-05	-0.417706686	0.777126746	0.999767122	PREDICTED: 4-coumarate--CoA ligase 1 [Brassica oleracea var. oleracea] [Brassica oleracea]	ko01100//Metabolic pathways;ko01110//Biosynthesis of secondary metabolites;ko00940//Phenylpropanoid biosynthesis;ko00360//Phenylalanine metabolism;ko00130//Ubiquinone and other terpenoid-quinone biosynthesis	GO:0043231//intracellular membrane-bounded organelle	GO:0016405//CoA-ligase activity;GO:0016703//oxidoreductase activity, acting on single donors with incorporation of molecular oxygen, incorporation of one atom of oxygen (internal monooxygenases or internal mixed function oxidases);GO:0036094//small molecule binding;GO:0097159//organic cyclic compound binding;GO:1901363//heterocyclic compound binding	GO:0006575//cellular modified amino acid metabolic process;GO:0006595//polyamine metabolic process;GO:0006605//protein targeting;GO:0006950//response to stress;GO:0009416//response to light stimulus;GO:0009699//phenylpropanoid biosynthetic process;GO:0009891//positive regulation of biosynthetic process;GO:0043067//regulation of programmed cell death;GO:0051707//response to other organism
MSTRG.72789	--	0	0	0	0.01	0	0	0.11	0.2	0.01	0.1067	0.0033	0	-1.736965594	0.928191093	0.987600447	6.736965594	0.000961787	0.022966504	BnaC04g19560D [Brassica napus]	-	-	-	-
MSTRG.72805	--	0.49	0.57	0.37	0	0.02	0	0.76	1.32	0.58	0.8867	0.0067	0.4767	6.159871337	8.22E-08	2.94E-06	0.895411099	0.005499233	0.086636599	BnaC06g01180D [Brassica napus]	-	GO:0009526//plastid envelope	-	GO:0006950//response to stress;GO:0048869//cellular developmental process
MSTRG.72974	CYP71B17	0.47	0.6	0.29	0	1.16	0.04	1.72	5.66	0.62	2.6667	0.4	0.4533	0.180572246	0.589263328	0.941069436	2.556393349	0.000300045	0.008959989	cytochrome P450 71B17-like isoform X1 [Brassica napus]	-	-	-	-
MSTRG.73171	--	1.32	2.91	0	0	0.04	0	0.04	0.15	0.11	0.1	0.0133	1.41	6.724513853	0.00065809	0.008019469	-3.817623258	0.056302993	0.412169896	unnamed protein product [Brassica napus]	-	-	-	-
MSTRG.73195	--	2.49	1.78	2.22	1.16	0.59	0.82	3.9	5.59	4	4.4967	0.8567	2.1633	1.336450119	1.47E-06	4.00E-05	1.055599965	1.82E-05	0.000868611	hypothetical protein Bca52824_027829 [Brassica carinata]	-	-	-	-
MSTRG.73196	--	2.49	1.78	2.22	1.16	0.59	0.82	3.9	5.59	4	4.4967	0.8567	2.1633	1.336450119	1.47E-06	4.00E-05	1.055599965	1.82E-05	0.000868611	hypothetical protein Bca52824_027829 [Brassica carinata]	-	-	-	-
MSTRG.7321	BRR2C	0.98	0.44	1.12	0.37	0.3	0.28	0.5	0.11	0.41	0.34	0.3167	0.8467	1.418829078	0.002764496	0.026375844	-1.316259345	0.418953083	0.98376659	BnaCnng11410D [Brassica napus]	-	GO:0044424//intracellular part	GO:0017111//nucleoside-triphosphatase activity	GO:0009606//tropism
MSTRG.73314	At1g51370	0	0.03	0	0.07	1.64	0.21	0	0	0	0	0.64	0.01	-6	0.003127499	0.029171108	-3.321928095	0.982006263	0.999767122	PREDICTED: F-box/FBD/LRR-repeat protein At1g51370-like [Brassica oleracea var. oleracea] [Brassica oleracea]	-	GO:0043231//intracellular membrane-bounded organelle	-	GO:0007126//meiotic nuclear division;GO:0044238//primary metabolic process;GO:0044260//cellular macromolecule metabolic process;GO:1902589//single-organism organelle organization;GO:1903046//meiotic cell cycle process
MSTRG.73505	--	1.5	1.22	2.93	2.48	2.02	1.8	0.2	0.3	0.32	0.2733	2.1	1.8833	-0.157100961	0.206286844	0.594373849	-2.784555053	0.000819336	0.020237135	BnaC03g66390D [Brassica napus]	ko03420//Nucleotide excision repair;ko03440//Homologous recombination;ko03030//DNA replication;ko03430//Mismatch repair	-	-	-
MSTRG.73566	RH50	0.3	0.6	1.01	2.85	0.83	0.37	0	0	0	0	1.35	0.6367	-1.08434927	0.593603133	0.942851184	-9.314394422	0.000982835	0.02331377	DEAD-box ATP-dependent RNA helicase 50-like isoform X2 [Brassica napus]	-	GO:0009536//plastid	GO:0042623//ATPase activity, coupled	GO:0003006//developmental process involved in reproduction;GO:0006090//pyruvate metabolic process;GO:0009058//biosynthetic process;GO:0009657//plastid organization;GO:0009886//post-embryonic morphogenesis;GO:0016072//rRNA metabolic process;GO:0046471//phosphatidylglycerol metabolic process
MSTRG.73684	At1g54445	3.48	5.39	8.3	20.96	67.07	31.07	0.09	1.36	1.76	1.07	39.7	5.7233	-2.794211469	3.30E-05	0.000616794	-2.419244837	0.058919975	0.423074616	BnaC06g10140D [Brassica napus]	-	-	-	-
MSTRG.73756	GMI1	0.69	1.06	0.62	3.24	2.12	2.39	0.28	0.23	0.68	0.3967	2.5833	0.79	-1.709309251	0.004865759	0.041515766	-0.993925486	0.527849517	0.999767122	LOW QUALITY PROTEIN: structural maintenance of chromosomes flexible hinge domain-containing protein GMI1 [Brassica rapa]	-	-	-	-
MSTRG.73759	GMI1	2.39	1.42	0.57	0.75	0.07	0.2	2.02	1.5	0.31	1.2767	0.34	1.46	2.102361718	0.002283504	0.022533033	-0.193586478	0.637532035	0.999767122	structural maintenance of chromosomes flexible hinge domain-containing protein GMI1 isoform X1 [Brassica rapa]	-	-	-	-
MSTRG.73771	CLSY4	0.24	0.18	0.17	1.14	1.24	1.35	0.03	0.02	0	0.0167	1.2433	0.1967	-2.660388771	4.89E-09	2.21E-07	-3.560714954	0.010314044	0.136705482	SNF2 domain-containing protein CLASSY 4 [Brassica rapa]	ko03440//Homologous recombination	GO:0043231//intracellular membrane-bounded organelle	GO:0003676//nucleic acid binding;GO:0017111//nucleoside-triphosphatase activity;GO:0032550//purine ribonucleoside binding	GO:0007154//cell communication;GO:0016571//histone methylation;GO:0030422//production of siRNA involved in RNA interference;GO:0045087//innate immune response;GO:0048580//regulation of post-embryonic development
MSTRG.74025	--	0.3	0.38	0.12	0.07	0.36	0.18	0.72	1.3	0.52	0.8467	0.2033	0.2667	0.391190757	0.265858934	0.68285553	1.666756592	0.002083445	0.041696544	BnaC07g31630D [Brassica napus]	-	GO:0043231//intracellular membrane-bounded organelle	-	-
MSTRG.74372	TPS07	3.18	2.89	2.91	0.07	0.06	0.01	2.28	1.68	5.8	3.2533	0.0467	2.9933	6.003216713	7.14E-40	7.06E-37	0.120165703	0.193177091	0.762177953	terpenoid synthase 26 [Eutrema salsugineum]	-	GO:0005911//cell-cell junction;GO:0009536//plastid	-	GO:0006714//sesquiterpenoid metabolic process;GO:0046246//terpene biosynthetic process
MSTRG.74488	--	1.26	0.82	1.4	2.88	3.55	8.58	0.11	0.06	0.16	0.11	5.0033	1.16	-2.108764766	0.008595953	0.065292515	-3.398549376	0.001476828	0.032007663	BnaA03g45780D [Brassica napus]	-	-	-	-
MSTRG.74625	--	20.57	22.28	23.32	6.23	4.73	3.77	10.32	14.62	7.67	10.87	4.91	22.0567	2.167419849	1.16E-40	1.23E-37	-1.020862838	0.261269038	0.856663279	unnamed protein product, partial [Brassica oleracea]	-	-	-	-
MSTRG.74842	--	0.07	0.07	0.07	2.52	3.33	2.69	0	0	0	0	2.8467	0.07	-5.345774837	2.11E-12	1.59E-10	-6.129283017	0.356111241	0.943382004	early nodulin-like protein 1 [Brassica napus]	-	GO:0005576//extracellular region;GO:0009536//plastid;GO:0031225//anchored component of membrane	-	-
MSTRG.74898	--	4.94	0.14	10.4	0	0	0	5.07	1.62	26.71	11.1333	0	5.16	12.33315535	7.08E-07	2.08E-05	1.109442631	0.215899558	0.796988424	BnaCnng15630D [Brassica napus]	-	-	-	-
MSTRG.74975	--	0.24	0.48	0.23	2.41	0.89	3.25	0	0.04	0	0.0133	2.1833	0.3167	-2.785495488	0.000852854	0.009920124	-4.569855608	0.010693935	0.140526952	hypothetical protein HID58_023083 [Brassica napus]	-	-	-	-
MSTRG.75074	XTH24	3.37	11.44	19.02	414.83	810.91	605.1	1.83	1.3	1.77	1.6333	610.28	11.2767	-5.75805873	3.39E-18	5.18E-16	-2.787449523	0.000939215	0.022574969	PREDICTED: xyloglucan endotransglucosylase/hydrolase protein 24 [Brassica oleracea var. oleracea] [Brassica oleracea]	-	GO:0005576//extracellular region;GO:0005618//cell wall;GO:0009536//plastid;GO:0016020//membrane	GO:0046527//glucosyltransferase activity;GO:0052736//beta-glucanase activity	GO:0006073//cellular glucan metabolic process;GO:0006950//response to stress;GO:0009605//response to external stimulus;GO:0009733//response to auxin;GO:0009827//plant-type cell wall modification;GO:0010087//phloem or xylem histogenesis;GO:0010243//response to organonitrogen compound;GO:0010476//gibberellin mediated signaling pathway;GO:0044767//single-organism developmental process
MSTRG.75281	--	4.43	4.15	4.58	0.57	0.5	0.26	1.37	0.67	2.08	1.3733	0.4433	4.3867	3.306661338	7.04E-42	7.98E-39	-1.675443247	0.014873437	0.175664022	unnamed protein product [Brassica napus]	-	-	-	-
MSTRG.75298	--	2.98	4.08	8.96	10.03	8.17	8.52	0.34	0.83	1.15	0.7733	8.9067	5.34	-0.73804586	0.782739359	0.981264477	-2.787677437	0.001240431	0.027973755	transmembrane protein [Arabidopsis thaliana]	-	-	-	-
MSTRG.75377	CHI	5.81	1.35	3.12	0.91	1.91	1.74	3	0.39	2.97	2.12	1.52	3.4267	1.172734535	0.004333915	0.037805422	-0.692741594	0.858232451	0.999767122	chalcone--flavonone isomerase [Brassica rapa]	ko01100//Metabolic pathways;ko01110//Biosynthesis of secondary metabolites;ko00941//Flavonoid biosynthesis	GO:0005774//vacuolar membrane;GO:0031312//extrinsic component of organelle membrane	GO:0005488//binding;GO:0016872//intramolecular lyase activity	GO:0009411//response to UV;GO:0009725//response to hormone;GO:0009813//flavonoid biosynthetic process;GO:0034285//response to disaccharide;GO:0048449//floral organ formation
MSTRG.75496	AAO	0.17	0.13	0.15	1.62	0.92	1.51	0.05	0.09	0.19	0.11	1.35	0.15	-3.169925001	2.97E-05	0.000561659	-0.447458977	0.907118834	0.999767122	L-ascorbate oxidase-like isoform X3 [Brassica napus]	-	-	GO:0016682//oxidoreductase activity, acting on diphenols and related substances as donors, oxygen as acceptor;GO:0043169//cation binding	GO:0006694//steroid biosynthetic process;GO:0009696//salicylic acid metabolic process;GO:0009814//defense response, incompatible interaction;GO:0030148//sphingolipid biosynthetic process
MSTRG.75500	--	0	0.09	0.09	0.69	0.57	0.76	0	0	0	0	0.6733	0.06	-3.488286481	0.002847908	0.027007929	-5.906890596	0.61405103	0.999767122	hypothetical protein F2Q70_00033588 [Brassica cretica]	-	-	-	-
MSTRG.7553	--	7.32	1.79	0.77	1.37	0.48	0.09	8.71	0.26	0.65	3.2067	0.6467	3.2933	2.348454389	0.004579542	0.039538152	-0.038474148	0.721398149	0.999767122	Ribonuclease H-like superfamily [Arabidopsis suecica]	-	-	-	-
MSTRG.75635	--	5.17	5.91	0.34	1.94	0.13	0.23	2.9	0	0.71	1.2033	0.7667	3.8067	2.311856884	1.67E-06	4.49E-05	-1.661491908	0.468695619	0.999767122	BnaC07g15840D [Brassica napus]	-	-	-	-
MSTRG.75637	--	2.33	1.52	0.09	0.12	0	0	2.22	0.11	0.26	0.8633	0.04	1.3133	5.037089319	0.000760652	0.009014224	-0.605243532	0.939431065	0.999767122	hypothetical protein IGI04_007375 [Brassica rapa subsp. trilocularis] [Brassica rapa]	-	-	-	-
MSTRG.76045	--	1.11	2.97	3.93	0.6	0.59	1.25	2.03	2.59	3.06	2.56	0.8133	2.67	1.714921095	0.000361089	0.00482025	-0.060695932	0.364742385	0.951047774	hypothetical protein HID58_080191, partial [Brassica napus]	-	-	-	-
MSTRG.76073	--	0.15	0.33	0.33	0.39	0.08	0.09	2.2	0.98	0.8	1.3267	0.1867	0.27	0.532495081	0.149367432	0.493714264	2.296774618	1.18E-05	0.000609047	Zinc finger CCHC-type [Arabidopsis suecica]	-	-	-	-
MSTRG.7618	At2g04925	0.34	0.61	0.67	1.97	6.08	2.85	0.19	0.38	0.39	0.32	3.6333	0.54	-2.750262417	0.000939886	0.010763026	-0.754887502	0.852623038	0.999767122	defensin-like protein 292 [Brassica napus]	-	-	-	-
MSTRG.76262	--	1.11	0.94	0.12	0	0	0.05	1.85	0.23	0.2	0.76	0.0167	0.7233	5.439623138	0.000101788	0.001653303	0.071338782	0.606480641	0.999767122	BnaC08g47480D [Brassica napus]	-	-	-	-
MSTRG.76295	--	0	0.2	0	0.52	32.42	9.34	0	0	0	0	14.0933	0.0667	-7.723831566	2.75E-05	0.00052573	-6.058893689	0.806782592	0.999767122	BnaC08g08260D [Brassica napus]	-	-	-	-
MSTRG.76383	At1g47056	1.51	1.24	1.24	0.27	0.23	0.34	1.06	2.17	1.32	1.5167	0.28	1.33	2.247927513	6.42E-09	2.85E-07	0.189477799	0.123537001	0.628318586	F-box protein At1g47056 isoform X2 [Brassica rapa]	-	-	-	-
MSTRG.76394	WRKY25	1.56	2.61	0.1	0.09	0.36	0.09	0.6	0.17	0.35	0.3733	0.18	1.4233	2.983204757	0.001896297	0.019290641	-1.930737338	0.229109249	0.814863411	PREDICTED: probable WRKY transcription factor 25 [Brassica oleracea var. oleracea] [Brassica oleracea]	ko04626//Plant-pathogen interaction;ko04016//MAPK signaling pathway - plant	GO:0043231//intracellular membrane-bounded organelle	GO:0001071//nucleic acid binding transcription factor activity;GO:0003677//DNA binding	GO:0006468//protein phosphorylation;GO:0006605//protein targeting;GO:0006952//defense response;GO:0006970//response to osmotic stress;GO:0009617//response to bacterium;GO:0009863//salicylic acid mediated signaling pathway;GO:0010286//heat acclimation;GO:0010468//regulation of gene expression;GO:0034645//cellular macromolecule biosynthetic process;GO:0043067//regulation of programmed cell death;GO…
MSTRG.76409	OEP162	2.41	1.49	1.93	0.31	0.35	0.16	2.85	3.45	3.65	3.3167	0.2733	1.9433	2.829800069	2.45E-18	3.80E-16	0.771200642	4.10E-05	0.001726401	BnaC03g42500D [Brassica napus]	-	-	-	-
MSTRG.76423	P67	1.11	1.05	0.98	4.71	3.15	3.28	0.71	1.25	0.72	0.8933	3.7133	1.0467	-1.826912768	6.06E-06	0.000139935	-0.228531558	0.386588452	0.9643054	PREDICTED: pentatricopeptide repeat-containing protein At4g16390, chloroplastic [Brassica oleracea var. oleracea] [Brassica oleracea]	-	GO:0009536//plastid	-	GO:0009058//biosynthetic process;GO:0010467//gene expression;GO:0016043//cellular component organization;GO:0044238//primary metabolic process;GO:0044260//cellular macromolecule metabolic process;GO:0044699//single-organism process
MSTRG.76427	--	0.43	0.82	0.55	3.12	2.46	4.33	0	0.11	0	0.0367	3.3033	0.6	-2.460888151	0.000943312	0.010797896	-4.032421478	0.050559696	0.385946599	BnaA05g20700D [Brassica napus]	-	-	-	-
MSTRG.76521	ZIFL2	2.03	2.88	2.35	1.32	1.18	0.98	1.92	3.91	2.13	2.6533	1.16	2.42	1.060882242	1.50E-12	1.15E-10	0.132798883	0.092578288	0.542375561	PREDICTED: probable peptide/nitrate transporter At3g43790 isoform X4 [Brassica oleracea var. oleracea] [Brassica oleracea]	-	GO:0031224//intrinsic component of membrane	GO:0022891//substrate-specific transmembrane transporter activity	GO:0006812//cation transport;GO:0044763//single-organism cellular process;GO:0051707//response to other organism
MSTRG.76570	HSP90-7	2.11	3.11	3.19	2.49	3.53	2.99	0.5	0.51	0.68	0.5633	3.0033	2.8033	-0.099421306	0.033859324	0.182738424	-2.315082554	9.99E-07	7.27E-05	PREDICTED: endoplasmin homolog [Brassica oleracea var. oleracea] [Brassica oleracea]	ko04626//Plant-pathogen interaction;ko04141//Protein processing in endoplasmic reticulum	GO:0005576//extracellular region;GO:0005911//cell-cell junction;GO:0009536//plastid;GO:0031090//organelle membrane;GO:0044432//endoplasmic reticulum part	GO:0005515//protein binding;GO:0032550//purine ribonucleoside binding	GO:0000302//response to reactive oxygen species;GO:0006006//glucose metabolic process;GO:0006090//pyruvate metabolic process;GO:0006498//N-terminal protein lipidation;GO:0006970//response to osmotic stress;GO:0006996//organelle organization;GO:0009642//response to light intensity;GO:0009933//meristem structural organization;GO:0010038//response to metal ion;GO:0015031//protein transport;GO:003355…
MSTRG.76600	EMB1027	1.12	1.68	1.21	0.73	0.77	0.69	0.2	0.36	0.27	0.2767	0.73	1.3367	0.872671367	4.15E-07	1.28E-05	-2.272418995	0.000678209	0.017427994	BnaC08g12170D [Brassica napus]	ko00970//Aminoacyl-tRNA biosynthesis	-	-	-
MSTRG.76911	TWN2	0.82	0.93	1.56	2.92	4.01	3.74	0.7	0.15	0.43	0.4267	3.5567	1.1033	-1.688657054	0.000773987	0.009141648	-1.370687407	0.234313067	0.821095153	PREDICTED: valine--tRNA ligase-like [Brassica oleracea var. oleracea] [Brassica oleracea]	ko00970//Aminoacyl-tRNA biosynthesis	GO:0009536//plastid	GO:0004812//aminoacyl-tRNA ligase activity;GO:0032550//purine ribonucleoside binding;GO:0052689//carboxylic ester hydrolase activity	GO:0003006//developmental process involved in reproduction;GO:0006418//tRNA aminoacylation for protein translation;GO:0006448//regulation of translational elongation
MSTRG.77100	OlnB6	0.96	1.66	3.33	0.25	0.29	0.31	0	0	0.35	0.1167	0.2833	1.9833	2.807354922	3.07E-05	0.000579083	-4.087462841	0.01531575	0.17907004	oleosin-B2-like isoform X1 [Brassica napus]	-	GO:0005811//lipid particle;GO:0016020//membrane;GO:0044420//extracellular matrix component	GO:0005488//binding	GO:0000003//reproduction;GO:0000904//cell morphogenesis involved in differentiation;GO:0006833//water transport;GO:0008037//cell recognition;GO:0009664//plant-type cell wall organization;GO:0051235//maintenance of location
MSTRG.77248	Os03g0733400	1.59	0.67	1.32	1.34	0.9	0.93	0.06	0	0.2	0.0867	1.0567	1.1933	0.175476747	0.060703376	0.276700643	-3.783376059	0.001682802	0.035291614	zinc finger BED domain-containing protein RICESLEEPER 2-like [Brassica rapa]	-	-	-	-
MSTRG.77384	--	3.04	4.76	3.92	7.92	8.17	11.3	1.15	0.53	0.88	0.8533	9.13	3.9067	-1.224676696	0.020341577	0.125866285	-2.194756854	0.00014736	0.005029376	hypothetical protein HID58_081896, partial [Brassica napus]	-	-	-	-
MSTRG.77398	--	0.46	0.91	0.56	0.09	0.13	0.18	0.58	0.35	0.81	0.58	0.1333	0.6433	2.270528942	0.001336183	0.014483442	-0.149513541	0.569863695	0.999767122	F12F1.6 [Arabidopsis thaliana]	-	-	-	-
MSTRG.77539	XTH25	0.03	0.04	0.04	0	0	0	1.32	2.95	0.58	1.6167	0	0.0367	5.196397213	0.204039626	0.590843696	5.462409318	2.67E-07	2.32E-05	PREDICTED: probable xyloglucan endotransglucosylase/hydrolase protein 25 [Brassica oleracea var. oleracea] [Brassica oleracea]	-	GO:0005576//extracellular region;GO:0009536//plastid;GO:0030312//external encapsulating structure	GO:0016758//transferase activity, transferring hexosyl groups;GO:0016787//hydrolase activity	GO:0006950//response to stress;GO:0009605//response to external stimulus;GO:0009725//response to hormone;GO:0010243//response to organonitrogen compound;GO:0044042//glucan metabolic process;GO:0071555//cell wall organization
MSTRG.77579	At3g10780	0.7	0.63	2.13	5.76	7.27	8.58	0.04	0	0.29	0.11	7.2033	1.1533	-2.642855129	0.000139923	0.002161962	-3.390234108	0.025426359	0.25186353	transmembrane emp24 domain-containing protein p24delta6 [Brassica rapa]	-	GO:0012505//endomembrane system;GO:0016020//membrane;GO:0043231//intracellular membrane-bounded organelle;GO:0044444//cytoplasmic part	-	GO:0015031//protein transport
MSTRG.7772	RPL12A	6.85	9.02	8.91	26.51	20.84	21.67	4.41	4.65	4.23	4.43	23.0067	8.26	-1.477838286	1.06E-05	0.000227599	-0.898835083	0.299143025	0.895767771	BnaCnng58960D [Brassica napus]	ko03010//Ribosome	GO:0000315//organellar large ribosomal subunit;GO:0009532//plastid stroma;GO:0044434//chloroplast part	GO:0005198//structural molecule activity	GO:0009617//response to bacterium;GO:0009725//response to hormone;GO:0010467//gene expression;GO:0032774//RNA biosynthetic process
MSTRG.7783	S2	403.87	347.92	386.28	39.8	20.3	12.22	684.59	809.03	715.17	736.2633	24.1067	379.3567	3.976050809	2.32E-26	7.36E-24	0.956666964	2.21E-12	7.88E-10	oleosin S2-2 [Brassica rapa]	-	GO:0005811//lipid particle;GO:0031224//intrinsic component of membrane	-	GO:0003006//developmental process involved in reproduction;GO:0009409//response to cold;GO:0009639//response to red or far red light;GO:0009756//carbohydrate mediated signaling;GO:0032446//protein modification by small protein conjugation;GO:0044085//cellular component biogenesis;GO:0048507//meristem development;GO:0048580//regulation of post-embryonic development;GO:0051235//maintenance of locat…
MSTRG.7784	OL2	33.74	21.5	27	4.02	2.01	1.84	48.27	44.72	36.49	43.16	2.6233	27.4133	3.385404724	4.42E-29	1.83E-26	0.654817101	3.20E-05	0.001397593	oleosin S2-2-like [Brassica napus]	-	GO:0005811//lipid particle;GO:0031224//intrinsic component of membrane	-	GO:0003006//developmental process involved in reproduction;GO:0009409//response to cold;GO:0009639//response to red or far red light;GO:0009756//carbohydrate mediated signaling;GO:0032446//protein modification by small protein conjugation;GO:0044085//cellular component biogenesis;GO:0048507//meristem development;GO:0048580//regulation of post-embryonic development;GO:0051235//maintenance of locat…
MSTRG.77989	FER3	4.27	4.83	4.39	19.21	17.42	16.22	1.64	2.01	1.68	1.7767	17.6167	4.4967	-1.970013123	5.93E-20	1.08E-17	-1.33968291	0.013538757	0.165022476	ferritin-1 [Zea mays]	-	GO:0009526//plastid envelope;GO:0009532//plastid stroma;GO:0044434//chloroplast part	GO:0005506//iron ion binding;GO:0016724//oxidoreductase activity, oxidizing metal ions, oxygen as acceptor	GO:0000041//transition metal ion transport;GO:0001101//response to acid chemical;GO:0006979//response to oxidative stress;GO:0009058//biosynthetic process;GO:0009668//plastid membrane organization;GO:0010038//response to metal ion;GO:0044237//cellular metabolic process;GO:0044710//single-organism metabolic process;GO:0046916//cellular transition metal ion homeostasis;GO:0048827//phyllome developm…
MSTRG.78142	PURA	3.01	4.23	4.19	9.74	9.57	10.67	3.18	2.26	2.48	2.64	9.9933	3.81	-1.39117498	2.14E-05	0.000421887	-0.529253068	0.834106505	0.999767122	PREDICTED: adenylosuccinate synthetase, chloroplastic [Brassica oleracea var. oleracea] [Brassica oleracea]	ko01100//Metabolic pathways;ko00230//Purine metabolism;ko00250//Alanine, aspartate and glutamate metabolism	GO:0005576//extracellular region;GO:0009532//plastid stroma	GO:0016879//ligase activity, forming carbon-nitrogen bonds;GO:0032550//purine ribonucleoside binding;GO:0046872//metal ion binding	GO:0006167//AMP biosynthetic process;GO:0006221//pyrimidine nucleotide biosynthetic process;GO:0010038//response to metal ion
MSTRG.78146	--	0.56	0.79	0.35	0	0.13	0.04	0.82	3.03	1.92	1.9233	0.0567	0.5667	3.321928095	0.00032095	0.004366042	1.763036573	0.001367982	0.030247155	unnamed protein product [Brassica napus]	-	-	-	-
MSTRG.7820	FIGL1	1.07	0.82	3.18	0.35	0	0	0.07	0.17	1.14	0.46	0.1167	1.69	3.85655892	0.001752415	0.018088427	-1.87731748	0.251143049	0.845367244	ATPase family AAA domain-containing protein FIGL1-like [Brassica napus]	-	-	GO:0032550//purine ribonucleoside binding;GO:0042623//ATPase activity, coupled	-
MSTRG.78331	--	1.66	1.6	1.06	0.8	0.68	0.52	1.27	1.3	1.18	1.25	0.6667	1.44	1.111031312	2.27E-07	7.44E-06	-0.204140717	0.26864088	0.863884713	la-related protein 6A isoform X2 [Arabidopsis lyrata subsp. lyrata] [Arabidopsis lyrata]	-	-	-	-
MSTRG.78335	ATG3	0.53	0.48	1.05	0.39	0.08	0.04	0.41	0.38	0.56	0.45	0.17	0.6867	2.014075185	0.004350597	0.037915914	-0.60968493	0.973836673	0.999767122	PREDICTED: autophagy-related protein 3-like [Camelina sativa]	ko04136//Autophagy - other	GO:0044444//cytoplasmic part	-	GO:0006605//protein targeting;GO:0016192//vesicle-mediated transport;GO:0032989//cellular component morphogenesis;GO:0040007//growth;GO:0044248//cellular catabolic process
MSTRG.78465	--	3.91	0.55	6.81	0.5	0.07	1.33	0.98	1.28	6.11	2.79	0.6333	3.7567	2.568416192	0.005272542	0.044253422	-0.429187988	0.895214485	0.999767122	hypothetical protein DY000_02056872 [Brassica cretica]	-	-	-	-
MSTRG.78571	--	13.81	1.65	2.12	8.05	1.4	4.29	0.41	0	0.04	0.15	4.58	5.86	0.355553066	0.279318452	0.699723966	-5.287866259	0.000448342	0.012494952	protein ALP1-like isoform X1 [Brassica rapa]	-	-	-	-
MSTRG.78602	CPN60A1	0.45	0.45	0.56	0.26	0.09	0.15	1.04	1.25	0.67	0.9867	0.1667	0.4867	1.545968369	0.000817889	0.009580889	1.019628807	0.002668744	0.05022568	PREDICTED: ruBisCO large subunit-binding protein subunit alpha, chloroplastic-like [Brassica oleracea var. oleracea] [Brassica oleracea]	-	GO:0005576//extracellular region;GO:0005840//ribosome;GO:0009526//plastid envelope;GO:0009532//plastid stroma	-	GO:0003006//developmental process involved in reproduction;GO:0009058//biosynthetic process;GO:0009657//plastid organization;GO:0044267//cellular protein metabolic process;GO:0044767//single-organism developmental process
MSTRG.78664	--	0.29	0.67	1.35	0.96	0.56	0.63	0	0	0	0	0.7167	0.77	0.103556192	0.298690158	0.723421232	-9.588714636	0.00112505	0.025909874	PREDICTED: glycine-rich RNA-binding protein GRP1A-like [Brassica oleracea var. oleracea] [Brassica oleracea]	-	-	-	-
MSTRG.78684	PUB7	16.75	11.96	18.13	24.95	14.84	35.65	4.72	2.42	6.08	4.4067	25.1467	15.6133	-0.6875886	0.864818287	0.987600447	-1.825018899	0.002636137	0.049703908	U-box domain-containing protein 7 [Brassica rapa]	-	-	-	-
MSTRG.78686	--	3.45	4.51	3.76	0.56	0.42	0.1	2.23	4.28	1.35	2.62	0.36	3.9067	3.439869352	3.07E-15	3.25E-13	-0.576371352	0.925199469	0.999767122	unnamed protein product, partial [Brassica napus]	-	-	-	-
MSTRG.79076	--	5.69	2.53	5.94	1.1	1.33	2.3	2.35	1.95	1.12	1.8067	1.5767	4.72	1.581909177	5.45E-05	0.000956665	-1.385456509	0.18650858	0.751664838	unnamed protein product [Brassica napus]	-	-	-	-
MSTRG.79207	At1g15757	0.19	0.73	0.21	4.33	45.85	16.12	0	0.13	0	0.0433	22.1	0.3767	-5.874614193	6.01E-08	2.21E-06	-3.119739244	0.224831601	0.808970908	Molecular chaperone Hsp40/DnaJ family protein [Arabidopsis thaliana]	-	-	-	-
MSTRG.79360	FUT6	1.48	1.03	1.23	3.93	1.8	3.61	0.34	0.12	0.23	0.23	3.1133	1.2467	-1.32038428	0.103276058	0.393001196	-2.438370003	0.001161189	0.026539503	probable fucosyltransferase 7 [Brassica rapa]	-	GO:0000139//Golgi membrane;GO:0031224//intrinsic component of membrane	GO:0031127//alpha-(1,2)-fucosyltransferase activity	GO:0006464//cellular protein modification process;GO:0009250//glucan biosynthetic process;GO:0009692//ethylene metabolic process;GO:0009746//response to hexose;GO:0034285//response to disaccharide;GO:0042546//cell wall biogenesis;GO:0045229//external encapsulating structure organization;GO:0045491//xylan metabolic process
MSTRG.79411	--	2.13	2.26	1.07	0.44	0.91	0.81	0.95	1.63	1	1.1933	0.72	1.82	1.337869639	4.54E-05	0.000815244	-0.608941364	0.933180577	0.999767122	unnamed protein product [Brassica napus]	-	-	-	-
MSTRG.79579	--	0	0	0	0	0	0	0	0	2.97	0.99	0	0	0	1	1	9.951284715	1.27E-08	1.63E-06	hypothetical protein HID58_083635 [Brassica napus]	-	-	-	-
MSTRG.79618	--	0.54	0.89	1.13	4.23	3.75	3.92	0.07	0.08	0.55	0.2333	3.9667	0.8533	-2.216745858	5.84E-05	0.001018389	-1.870716983	0.256303568	0.852051433	hypothetical protein Bca52824_016293 [Brassica carinata]	-	-	-	-
MSTRG.79709	AXS2	60.22	76.19	64.59	190.05	135.75	264.88	27.66	25.58	31.4	28.2133	196.8933	67	-1.555181263	0.001076917	0.012094289	-1.247783969	0.000535007	0.014393041	PREDICTED: UDP-D-apiose/UDP-D-xylose synthase 2 [Brassica oleracea var. oleracea] [Brassica oleracea]	ko01100//Metabolic pathways;ko00520//Amino sugar and nucleotide sugar metabolism	GO:0005576//extracellular region;GO:0043231//intracellular membrane-bounded organelle;GO:0044444//cytoplasmic part	GO:0000166//nucleotide binding;GO:0016831//carboxy-lyase activity;GO:0048037//cofactor binding	GO:0009165//nucleotide biosynthetic process;GO:0045229//external encapsulating structure organization
MSTRG.79730	At3g07100	0.05	0.12	0.14	2.97	3.08	3.01	0	0	0.05	0.0167	3.02	0.1033	-4.86917093	1.78E-17	2.43E-15	-2.632268215	0.175972734	0.734921454	protein transport protein Sec24-like At3g07100 [Brassica rapa]	ko04141//Protein processing in endoplasmic reticulum	-	-	-
MSTRG.7976	--	5	0.95	0.65	0.73	0.48	0.04	7.74	0.11	0.32	2.7233	0.4167	2.2	2.40053793	0.00472294	0.040535858	0.307870054	1	1	dentin matrix acidic phosphoprotein 1-like [Brassica napus]	-	-	-	-
MSTRG.7983	--	10.76	2.3	0.6	0.49	0.49	0.18	13.34	0.22	0.49	4.6833	0.3867	4.5533	3.557760773	8.54E-05	0.001414428	0.040612647	0.731303365	0.999767122	dentin matrix acidic phosphoprotein 1-like [Brassica napus]	-	-	-	-
MSTRG.7984	--	15.13	1.78	0.64	1.24	0.61	0.09	12.5	0.46	0.51	4.49	0.6467	5.85	3.177342473	0.002410323	0.023570961	-0.38172118	0.941106099	0.999767122	hypothetical protein IGI04_042584 [Brassica rapa subsp. trilocularis] [Brassica rapa]	-	-	-	-
MSTRG.79860	At1g04380	0.86	0.25	0.43	0.08	0	0	1.01	1.85	0.48	1.1133	0.0267	0.5133	4.266786541	0.000672879	0.00816302	1.116917752	0.054200799	0.402460825	BnaC08g43890D [Brassica napus]	-	-	GO:0016641//oxidoreductase activity, acting on the CH-NH2 group of donors, oxygen as acceptor;GO:0016706//oxidoreductase activity, acting on paired donors, with incorporation or reduction of molecular oxygen, 2-oxoglutarate as one donor, and incorporation of one atom each of oxygen into both donors;GO:0016740//transferase activity;GO:0043169//cation binding	GO:0001101//response to acid chemical;GO:0006355//regulation of transcription, DNA-templated;GO:0006787//porphyrin-containing compound catabolic process;GO:0009404//toxin metabolic process;GO:0010038//response to metal ion;GO:0014070//response to organic cyclic compound;GO:0015698//inorganic anion transport;GO:0030001//metal ion transport
MSTRG.79915	NET3A	1.43	1.05	0.69	0.62	0.35	0.29	11.36	15.87	7.84	11.69	0.42	1.0567	1.331059107	0.000280184	0.003889368	3.467682685	9.21E-17	7.89E-14	PREDICTED: protein NETWORKED 3A-like [Brassica oleracea var. oleracea] [Brassica oleracea]	-	-	-	GO:0006796//phosphate-containing compound metabolic process
MSTRG.79934	--	0.79	0.67	0.76	0.16	0.49	0.33	0.48	0.05	0.92	0.4833	0.3267	0.74	1.179706022	0.002342837	0.022999413	-0.614506776	0.955389684	0.999767122	-	-	-	-	-
MSTRG.7994	--	0	0.32	0.42	2.53	24.2	2.13	0	0	0.14	0.0467	9.62	0.2467	-5.285402219	0.000299488	0.004120256	-2.402098444	0.515475942	0.999767122	BnaC05g18950D [Brassica napus]	-	-	-	-
MSTRG.79977	--	0.75	0.18	0.99	0.11	0.08	0.08	0.51	0	0.35	0.2867	0.09	0.64	2.830074999	0.000517578	0.006556994	-1.158697746	0.634574869	0.999767122	-	-	-	-	-
MSTRG.80004	--	0.92	0.32	0.1	0	0	0	12.76	11.13	6.54	10.1433	0	0.4467	8.803054785	1.91E-05	0.000382849	4.505189428	4.53E-11	1.11E-08	hypothetical protein F2Q69_00009836 [Brassica cretica]	-	-	-	-
MSTRG.80148	--	0.07	0	0.04	0	0	0.03	1.13	1.9	1.45	1.4933	0.01	0.0367	1.874469118	0.398878505	0.823344529	5.347923303	6.41E-09	9.03E-07	hypothetical protein F2Q69_00003190 [Brassica cretica]	-	-	-	-
MSTRG.80153	--	5.43	1.73	8.37	0.58	0.62	0.7	11.44	10.75	16.52	12.9033	0.6333	5.1767	3.030986506	1.08E-06	3.04E-05	1.317648478	0.003163653	0.057085948	BnaA04g12410D [Brassica napus]	-	-	-	-
MSTRG.80177	--	4.29	0.55	1.21	0.14	0	0.05	1.53	0.07	0.14	0.58	0.0633	2.0167	4.992863819	7.60E-06	0.000170652	-1.797847836	0.333216614	0.926510036	Retrotransposon Copia-like N-terminal [Arabidopsis suecica]	-	-	-	-
MSTRG.80517	--	3.83	5.39	4.46	1.19	1.77	1.28	4.44	11.71	8.6	8.25	1.4133	4.56	1.68993206	3.84E-10	2.07E-08	0.855360295	0.004571631	0.075791163	unnamed protein product [Brassica napus]	-	-	-	-
MSTRG.80528	CYTC-2	1.2	1.02	0.88	0.86	1.22	0.48	2.46	3.5	1.22	2.3933	0.8533	1.0333	0.276124405	0.059138414	0.271666987	1.211715629	0.001089579	0.025257264	PREDICTED: LOW QUALITY PROTEIN: cytochrome c-2-like [Brassica oleracea var. oleracea] [Brassica oleracea]	-	GO:0031090//organelle membrane;GO:0031970//organelle envelope lumen;GO:0043231//intracellular membrane-bounded organelle;GO:0044425//membrane part;GO:0044444//cytoplasmic part	GO:0046906//tetrapyrrole binding;GO:0046914//transition metal ion binding	GO:0006006//glucose metabolic process
MSTRG.80550	--	4.6	0.59	1.91	0.33	0.24	0.23	3.54	0.41	1.44	1.7967	0.2667	2.3667	3.14974712	3.03E-05	0.000571685	-0.397533752	0.899743726	0.999767122	F27F5.21 [Arabidopsis thaliana]	-	-	-	-
MSTRG.80560	ABCC4	2.02	1.94	1.58	5.61	6.09	5.63	0.97	0.86	0.61	0.8133	5.7767	1.8467	-1.645313773	3.29E-09	1.54E-07	-1.183004828	0.10001487	0.565985358	PREDICTED: LOW QUALITY PROTEIN: ABC transporter C family member 4-like [Brassica oleracea var. oleracea] [Brassica oleracea]	ko02010//ABC transporters	GO:0031224//intrinsic component of membrane	GO:0015405//P-P-bond-hydrolysis-driven transmembrane transporter activity;GO:0016628//oxidoreductase activity, acting on the CH-CH group of donors, NAD or NADP as acceptor;GO:0017111//nucleoside-triphosphatase activity;GO:0032550//purine ribonucleoside binding	GO:0044710//single-organism metabolic process;GO:0044763//single-organism cellular process;GO:0051234//establishment of localization
MSTRG.80616	--	1.07	0.5	0.65	11.07	3.98	5.59	0.18	0.07	0.04	0.0967	6.88	0.74	-3.216811389	1.01E-06	2.87E-05	-2.936434871	0.009935403	0.132906959	Harbinger transposase-derived protein [Arabidopsis suecica]	-	-	-	-
MSTRG.80692	PAS2	0.1	0.11	0.09	1.39	0.71	0.96	0	0	0	0	1.02	0.1	-3.350497247	0.000375676	0.004978213	-6.64385619	0.07728476	0.493215779	BnaC09g38570D [Brassica napus]	-	-	-	-
MSTRG.80740	--	9.13	11.65	14.66	0.54	1.69	0.59	16.22	30.86	27.46	24.8467	0.94	11.8133	3.651611536	2.27E-20	4.26E-18	1.072636215	2.98E-05	0.0013177	Reverse transcriptase domain [Arabidopsis suecica]	-	-	-	-
MSTRG.80882	SPH9	1.53	3.68	2.77	26.01	159.72	35.19	0.53	0.76	0.4	0.5633	73.64	2.66	-4.790991476	6.58E-09	2.92E-07	-2.2393655	0.029621746	0.276662151	S-protein homolog 9 [Eutrema salsugineum]	-	-	-	-
MSTRG.81097	--	0.39	0.46	1.21	0.21	0.19	0.11	0.39	0.15	0.37	0.3033	0.17	0.6867	2.014075185	0.000917488	0.010530661	-1.178705887	0.49704142	0.999767122	BnaA08g00330D [Brassica napus]	-	-	-	-
MSTRG.81120	AtMg00310	1.17	0.25	0.39	0	0.03	0.07	1.65	1.46	1.19	1.4333	0.0333	0.6033	4.177917792	5.39E-05	0.000948107	1.248346963	0.010916339	0.142484555	Reverse transcriptase zinc-binding domain [Arabidopsis thaliana x Arabidopsis arenosa]	-	-	-	-
MSTRG.81208	--	2.38	2.24	2.42	5.22	6.15	11.4	1.63	0.98	1.12	1.2433	7.59	2.3467	-1.693486957	0.003345379	0.030717847	-0.916399798	0.331259498	0.925408068	cyclin-dependent kinase F-4-like isoform X1 [Brassica napus]	-	GO:0043231//intracellular membrane-bounded organelle	GO:0004674//protein serine/threonine kinase activity	GO:0006417//regulation of translation;GO:0006486//protein glycosylation;GO:0006796//phosphate-containing compound metabolic process
MSTRG.81231	MAP1A	6.44	7.62	6.47	5.25	5.07	5.05	2.03	1.6	2.91	2.18	5.1233	6.8433	0.417616462	6.34E-11	3.88E-09	-1.650371087	0.001928703	0.03936391	Peptidase M24A methionine aminopeptidase subfamily 1 [Arabidopsis suecica]	-	GO:0044444//cytoplasmic part	GO:0008233//peptidase activity	GO:0006464//cellular protein modification process;GO:0006508//proteolysis;GO:0009409//response to cold;GO:0043479//pigment accumulation in tissues in response to UV light;GO:0048437//floral organ development
MSTRG.81239	MAP70.3	2.1	0.27	0.86	0.29	0.04	0.07	1.33	0.05	0.76	0.7133	0.1333	1.0767	3.01346226	0.000280189	0.003889368	-0.593923368	0.946253545	0.999767122	BnaC03g62630D [Brassica napus]	-	GO:0016020//membrane;GO:0055028//cortical microtubule	GO:0015631//tubulin binding	GO:0003002//regionalization;GO:0003006//developmental process involved in reproduction;GO:0006281//DNA repair;GO:0006310//DNA recombination;GO:0006342//chromatin silencing;GO:0007015//actin filament organization;GO:0007059//chromosome segregation;GO:0034968//histone lysine methylation;GO:0042546//cell wall biogenesis;GO:0043623//cellular protein complex assembly;GO:0045229//external encapsulating…
MSTRG.81328	--	1.13	1.08	1.15	0.48	0.68	0.11	1.12	2.92	0.74	1.5933	0.4233	1.12	1.403632736	0.004047381	0.035865533	0.508549385	0.122836673	0.62672023	-	-	-	-	-
MSTRG.81368	--	0.55	0.36	0.18	0	0	0.04	0.8	0.34	1.22	0.7867	0.0133	0.3633	4.768184325	0.000611015	0.007558177	1.114458725	0.041248526	0.341399786	hypothetical protein F2Q69_00036103 [Brassica cretica]	-	-	-	-
MSTRG.81373	--	3.55	16.93	0.82	4.03	3.17	0.2	0.07	0.17	0	0.08	2.4667	7.1	1.525256255	0.127136254	0.448206095	-6.471675214	8.16E-06	0.000446507	Harbinger transposase-derived protein [Arabidopsis suecica]	-	-	-	-
MSTRG.81426	RPA1C	0.46	0.93	0.38	1.99	2.76	1.93	0.38	0.45	0.14	0.3233	2.2267	0.59	-1.916098742	0.001742605	0.01801123	-0.867692708	0.723377392	0.999767122	PREDICTED: replication protein A 70 kDa DNA-binding subunit C-like [Brassica oleracea var. oleracea] [Brassica oleracea]	ko03420//Nucleotide excision repair;ko03440//Homologous recombination;ko03030//DNA replication;ko03430//Mismatch repair	GO:0043231//intracellular membrane-bounded organelle	GO:0003676//nucleic acid binding;GO:0046872//metal ion binding	GO:0000723//telomere maintenance;GO:0003006//developmental process involved in reproduction;GO:0006310//DNA recombination;GO:0006355//regulation of transcription, DNA-templated;GO:0006464//cellular protein modification process;GO:0007059//chromosome segregation;GO:0007127//meiosis I;GO:0007276//gamete generation;GO:0009314//response to radiation;GO:0009791//post-embryonic development;GO:0033554//…
MSTRG.81553	--	21.1	6.51	12.72	0	0.05	0	516.79	417.97	402.8	445.8533	0.0167	13.4433	9.655709596	2.58E-18	4.00E-16	5.051606393	2.48E-30	2.25E-26	acanthoscurrin-2-like [Brassica napus]	-	-	-	-
MSTRG.81554	NUDT8	0.61	0.1	0.24	0.02	0	0	4.51	2.37	2.24	3.04	0.0067	0.3167	5.569855608	3.75E-05	0.000689876	3.263034406	1.07E-07	1.06E-05	acanthoscurrin-2-like [Brassica napus]	-	-	-	GO:0006950//response to stress
MSTRG.81595	--	2.06	1.21	2.37	0.28	0.47	0.6	1.06	0.5	1.57	1.0433	0.45	1.88	2.062735755	3.38E-07	1.06E-05	-0.849532505	0.656381966	0.999767122	hypothetical protein IGI04_006694 [Brassica rapa subsp. trilocularis] [Brassica rapa]	-	-	-	-
MSTRG.81813	At1g49360	0	0.05	0.11	0.21	3.24	0.43	0	0	0.07	0.0233	1.2933	0.0533	-4.599912842	0.004276542	0.03742404	-1.192645078	0.819720729	0.999767122	F-box family protein [Arabidopsis thaliana]	-	-	-	-
MSTRG.81887	--	2.75	0.53	0.04	0.19	0.04	0.02	2.13	0.13	0.06	0.7733	0.0833	1.1067	3.731183242	0.001509215	0.016047876	-0.517058436	0.987804148	0.999767122	hypothetical protein HID58_095745, partial [Brassica napus]	-	-	-	-
MSTRG.81982	GAD2	11.2	4.99	6.46	0.58	0.32	0	16.15	20.1	17.53	17.9267	0.3	7.55	4.653442239	1.08E-08	4.61E-07	1.247558705	1.37E-05	0.000684692	glutamate decarboxylase 2-like [Brassica rapa]	ko01100//Metabolic pathways;ko01110//Biosynthesis of secondary metabolites;ko00250//Alanine, aspartate and glutamate metabolism;ko00410//beta-Alanine metabolism;ko00650//Butanoate metabolism;ko00430//Taurine and hypotaurine metabolism	GO:0043231//intracellular membrane-bounded organelle;GO:0044444//cytoplasmic part	GO:0005515//protein binding;GO:0016705//oxidoreductase activity, acting on paired donors, with incorporation or reduction of molecular oxygen;GO:0016831//carboxy-lyase activity;GO:0043168//anion binding;GO:0043169//cation binding	GO:0001101//response to acid chemical;GO:0006605//protein targeting;GO:0006873//cellular ion homeostasis;GO:0006970//response to osmotic stress;GO:0009064//glutamine family amino acid metabolic process;GO:0009746//response to hexose;GO:0009891//positive regulation of biosynthetic process;GO:0010038//response to metal ion;GO:0015698//inorganic anion transport;GO:0030001//metal ion transport;GO:003…
MSTRG.82204	ALATS	1.06	1.89	1.84	4.28	7.63	7.13	0.09	0.14	0.36	0.1967	6.3467	1.5967	-1.990935918	3.91E-05	0.000715556	-3.021238796	0.000152095	0.005158567	alanine--tRNA ligase isoform X1 [Brassica napus]	ko00970//Aminoacyl-tRNA biosynthesis	GO:0009536//plastid	GO:0003676//nucleic acid binding;GO:0004812//aminoacyl-tRNA ligase activity;GO:0032550//purine ribonucleoside binding;GO:0046914//transition metal ion binding	GO:0000959//mitochondrial RNA metabolic process;GO:0006006//glucose metabolic process;GO:0006090//pyruvate metabolic process;GO:0006405//RNA export from nucleus;GO:0006418//tRNA aminoacylation for protein translation;GO:0006498//N-terminal protein lipidation;GO:0006970//response to osmotic stress;GO:0010038//response to metal ion;GO:0019827//stem cell population maintenance;GO:0048580//regulation…
MSTRG.82230	MRS2-1	0.51	0.12	0.17	0	0.26	0	1.11	3.49	0.93	1.8433	0.0867	0.2667	1.621488377	0.180833547	0.551238097	2.789207575	0.000154449	0.005223179	magnesium transporter 2 [Arabidopsis thaliana]	-	GO:0016020//membrane;GO:0043231//intracellular membrane-bounded organelle	GO:0046873//metal ion transmembrane transporter activity	GO:0044763//single-organism cellular process;GO:0070838//divalent metal ion transport
MSTRG.82382	PLC5	0.11	0.15	0.14	0.76	0.46	0.6	0.04	0.02	0.1	0.0533	0.6067	0.1333	-2.185866545	0.004062501	0.035974683	-1.321928095	0.496545996	0.999767122	PREDICTED: phosphoinositide phospholipase C 5 [Brassica oleracea var. oleracea] [Brassica oleracea]	ko01100//Metabolic pathways;ko04070//Phosphatidylinositol signaling system;ko00562//Inositol phosphate metabolism	-	GO:0016787//hydrolase activity	GO:0006629//lipid metabolic process;GO:0007165//signal transduction
MSTRG.82404	--	19.75	11.26	0.83	3.53	1.09	0.22	28.52	0.78	2	10.4333	1.6133	10.6133	2.717761383	0.002531704	0.024526534	-0.024677679	0.72435712	0.999767122	hypothetical protein IGI04_042921 [Brassica rapa subsp. trilocularis] [Brassica rapa]	-	-	-	-
MSTRG.82519	AHA3	4.97	7.55	8.63	29.46	19.03	39.27	1.61	1.39	3.73	2.2433	29.2533	7.05	-2.052905862	2.18E-05	0.000428935	-1.651979253	0.032836323	0.295110159	ATPase 3, plasma membrane-type [Brassica rapa]	ko00190//Oxidative phosphorylation	GO:0005911//cell-cell junction;GO:0031090//organelle membrane;GO:0031224//intrinsic component of membrane;GO:0043231//intracellular membrane-bounded organelle;GO:0044444//cytoplasmic part	GO:0008324//cation transmembrane transporter activity;GO:0015662//ATPase activity, coupled to transmembrane movement of ions, phosphorylative mechanism;GO:0032550//purine ribonucleoside binding;GO:0046872//metal ion binding	GO:0001101//response to acid chemical;GO:0006464//cellular protein modification process;GO:0006865//amino acid transport;GO:0006950//response to stress;GO:0009152//purine ribonucleotide biosynthetic process;GO:0009664//plant-type cell wall organization;GO:0010383//cell wall polysaccharide metabolic process;GO:0015698//inorganic anion transport;GO:0015833//peptide transport;GO:0015988//energy coup…
MSTRG.82527	--	0	0.04	0.04	1.16	0.72	1.2	0	0	0	0	1.0267	0.0267	-5.266786541	3.73E-05	0.000686718	-4.736965594	0.803919893	0.999767122	PREDICTED: hydroxyproline O-galactosyltransferase GALT3-like [Raphanus sativus]	-	GO:0031224//intrinsic component of membrane;GO:0043231//intracellular membrane-bounded organelle	GO:0016758//transferase activity, transferring hexosyl groups	GO:0006464//cellular protein modification process
MSTRG.82614	--	0.63	0.94	0.03	0.04	0	0.03	0.43	0.07	0.04	0.18	0.0233	0.5333	4.514573173	0.000808444	0.009484038	-1.567040593	0.479481427	0.999767122	hypothetical protein DY000_02018020 [Brassica cretica]	-	-	-	-
MSTRG.82834	GIP2	1.11	0.91	0.08	0.1	0.02	0.11	2.86	0.38	1.17	1.47	0.0767	0.7	3.190683562	0.000698912	0.008404445	1.070389328	0.130263838	0.643059247	probable aspartic proteinase GIP2 [Brassica rapa]	-	-	-	GO:0019538//protein metabolic process
MSTRG.82869	TAF2	1.07	3.41	0.06	0.24	0.11	0	2.08	0.2	0.58	0.9533	0.1167	1.5133	3.69726547	0.003122849	0.029140536	-0.666677151	0.929594016	0.999767122	transcription initiation factor TFIID subunit 2 [Eutrema salsugineum]	ko03022//Basal transcription factors	-	-	-
MSTRG.82911	TON2	0.13	0.14	0.14	1.58	0.64	1.64	0	0.17	0.27	0.1467	1.2867	0.1367	-3.234905033	0.003195432	0.02965857	0.101879614	0.662694328	0.999767122	probable serine/threonine-protein phosphatase 2A regulatory subunit B'' subunit TON2 [Brassica napus]	ko03015//mRNA surveillance pathway	GO:0015630//microtubule cytoskeleton;GO:0043231//intracellular membrane-bounded organelle;GO:0044444//cytoplasmic part	GO:0019888//protein phosphatase regulator activity;GO:0046872//metal ion binding	GO:0000904//cell morphogenesis involved in differentiation;GO:0007015//actin filament organization;GO:0007017//microtubule-based process;GO:0010053//root epidermal cell differentiation;GO:0019222//regulation of metabolic process;GO:0022607//cellular component assembly;GO:0022610//biological adhesion;GO:0045229//external encapsulating structure organization
MSTRG.82937	DSC2	0.27	0.25	0.14	0.05	0.04	0.02	0.09	0.05	0.19	0.11	0.0367	0.22	2.584962501	0.000286014	0.003957943	-1	0.596394394	0.999767122	disease resistance protein TAO1-like [Brassica napus]	-	GO:0044424//intracellular part	-	GO:0006950//response to stress;GO:0009617//response to bacterium
MSTRG.83018	--	1.79	0.94	1.64	0.3	0.5	0.45	2.19	0.64	2.35	1.7267	0.4167	1.4567	1.805705185	6.13E-06	0.000141404	0.245318818	0.214351057	0.794694468	hypothetical protein F2Q68_00022574 [Brassica cretica]	-	-	-	-
MSTRG.83046	--	4.22	3.92	3.76	0.6	0.85	0.78	6.35	8.29	6.28	6.9733	0.7433	3.9667	2.415845958	1.03E-17	1.44E-15	0.813921278	1.19E-05	0.000612207	unnamed protein product [Brassica napus]	-	-	-	-
MSTRG.83068	--	0	0.13	0.13	0	0.06	0	2.67	0.41	1.36	1.48	0.02	0.0867	2.115477217	0.28254281	0.703441726	4.093976148	0.000153104	0.005184152	B-cell receptor-associated protein 31-like [Carex littledalei]	-	-	-	-
MSTRG.83074	--	1.35	2.98	2.01	1.16	0.98	0.78	0.38	0.45	0.36	0.3967	0.9733	2.1133	1.118514471	1.49E-05	0.000308794	-2.413521267	0.000601178	0.015741573	BnaC09g40820D [Brassica napus]	-	GO:0009526//plastid envelope;GO:0031976//plastid thylakoid;GO:0044434//chloroplast part	GO:0043169//cation binding	GO:0006739//NADP metabolic process;GO:0006996//organelle organization;GO:0009639//response to red or far red light;GO:0016072//rRNA metabolic process;GO:0043623//cellular protein complex assembly
MSTRG.83357	--	7.06	1.82	6.3	2.37	1.28	1.19	7.49	1.74	8.16	5.7967	1.6133	5.06	1.649092838	8.83E-05	0.00145668	0.196086142	0.311032402	0.907895972	BnaAnng38960D [Brassica napus]	-	-	-	-
MSTRG.83364	CYCB1-2	2.46	2.59	3.29	8.28	7.2	7.44	1.04	0.83	1.12	0.9967	7.64	2.78	-1.458487755	3.29E-05	0.000614297	-1.479901899	0.018847341	0.206097679	BnaC01g36320D [Brassica napus]	-	GO:0043231//intracellular membrane-bounded organelle	GO:0019900//kinase binding	GO:0010212//response to ionizing radiation;GO:0010374//stomatal complex development;GO:0051726//regulation of cell cycle
MSTRG.83441	FTIP3	0.3	0.48	0.17	1.16	1.54	1.49	0.21	0.26	0.1	0.19	1.3967	0.3167	-2.140950825	0.0003803	0.005027735	-0.736965594	0.876941886	0.999767122	PREDICTED: protein QUIRKY-like [Brassica oleracea var. oleracea] [Brassica oleracea]	-	-	-	-
MSTRG.83578	--	0	0	0	0.75	35.05	4.63	0	0	0	0	13.4767	0	-13.71817608	1.40E-05	0.000291427	0	1	1	BnaA10g10070D [Brassica napus]	-	-	-	-
MSTRG.83621	--	0.52	1.75	0.34	0	0.19	0	0.23	1.06	0.13	0.4733	0.0633	0.87	3.779978483	0.002725865	0.026057003	-0.878158877	0.824705479	0.999767122	unnamed protein product [Brassica napus]	-	-	-	-
MSTRG.83622	--	1.97	3.55	2.83	0.32	1.14	0.52	1.68	2.02	0.94	1.5467	0.66	2.7833	2.076275767	3.02E-07	9.64E-06	-0.847651392	0.638867413	0.999767122	unnamed protein product [Brassica napus]	-	-	-	-
MSTRG.8370	--	0	0	0	0.52	45.06	12.43	0	0	0	0	19.3367	0	-14.2390515	5.78E-05	0.001009088	0	1	1	BnaAnng06900D [Brassica napus]	-	-	-	-
MSTRG.83743	CYP86A1	0.1	0.12	0.07	0	0	0	2.67	0.64	0.96	1.4233	0	0.0967	6.594946589	0.00261072	0.025174359	3.880111264	2.34E-08	2.77E-06	cytochrome P450 86A1 [Brassica napus]	ko00071//Fatty acid degradation;ko00073//Cutin, suberine and wax biosynthesis	GO:0031224//intrinsic component of membrane;GO:0043231//intracellular membrane-bounded organelle	GO:0016712//oxidoreductase activity, acting on paired donors, with incorporation or reduction of molecular oxygen, reduced flavin or flavoprotein as one donor, and incorporation of one atom of oxygen;GO:0016713//oxidoreductase activity, acting on paired donors, with incorporation or reduction of molecular oxygen, reduced iron-sulfur protein as one donor, and incorporation of one atom of oxygen;GO…	GO:0009699//phenylpropanoid biosynthetic process;GO:0030001//metal ion transport;GO:0032787//monocarboxylic acid metabolic process
MSTRG.83834	RBL1	0	0	0	2.64	1.14	1.4	0	0	0	0	1.7267	0	-10.75377388	3.36E-06	8.37E-05	0	1	1	PREDICTED: RHOMBOID-like protein 3 isoform X1 [Brassica oleracea var. oleracea] [Brassica oleracea]	-	GO:0005911//cell-cell junction;GO:0031224//intrinsic component of membrane;GO:0043231//intracellular membrane-bounded organelle	-	GO:0019538//protein metabolic process
MSTRG.83881	FH6	1.92	1.99	2.49	4.11	7.82	6.94	2.24	2.13	1.25	1.8733	6.29	2.1333	-1.559950613	0.002102983	0.021007828	-0.187501775	0.269100362	0.864386198	PREDICTED: ankyrin repeat-containing protein At5g02620 [Raphanus sativus]	-	-	-	-
MSTRG.83894	--	2.3	0.21	1.02	0	0.05	0	0.61	0.07	0.9	0.5267	0.0167	1.1767	6.141596278	4.46E-05	0.000802893	-1.159743625	0.598472647	0.999767122	hypothetical protein F2Q69_00045597 [Brassica cretica]	-	-	-	-
MSTRG.83925	At5g05130	1.04	2.21	1.47	10.64	28.37	11.02	0.03	0.16	0.47	0.22	16.6767	1.5733	-3.405934688	1.38E-08	5.73E-07	-2.83824893	0.012716089	0.158167403	helicase-like transcription factor-like protein [Arabidopsis thaliana]	-	GO:0043231//intracellular membrane-bounded organelle	GO:0003676//nucleic acid binding;GO:0017111//nucleoside-triphosphatase activity;GO:0032550//purine ribonucleoside binding;GO:0046914//transition metal ion binding	GO:0000280//nuclear division;GO:0006342//chromatin silencing;GO:0007059//chromosome segregation;GO:0033043//regulation of organelle organization;GO:0051276//chromosome organization
MSTRG.84086	IDM3	0.41	0.53	0.35	1.68	1.16	1.47	0.01	0.02	0.08	0.0367	1.4367	0.43	-1.740316804	0.000417732	0.005450527	-3.551795637	0.000895454	0.021715421	PREDICTED: increased DNA methylation 3-like isoform X1 [Brassica oleracea var. oleracea] [Brassica oleracea]	-	-	-	-
MSTRG.84135	At4g11040	0.6	0.08	0.68	0.1	0.03	0.07	0.78	0	1.8	0.86	0.0667	0.4533	2.765534746	0.00270591	0.025898292	0.923764414	0.331277412	0.925408068	PREDICTED: probable protein phosphatase 2C 54 [Brassica oleracea var. oleracea] [Brassica oleracea]	-	-	-	-
MSTRG.84156	TIC62	0.3	0.54	0.33	1.64	1.89	1.76	0.34	0.27	0.35	0.32	1.7633	0.39	-2.176759193	0.001558691	0.016462508	-0.285402219	0.711992241	0.999767122	BnaCnng12000D [Brassica napus]	-	GO:0009526//plastid envelope;GO:0009579//thylakoid;GO:0016020//membrane;GO:0044434//chloroplast part	-	-
MSTRG.84159	--	3.22	3.46	4.08	2.63	2.14	1.95	10.87	19.95	5.05	11.9567	2.24	3.5867	0.67914494	1.54E-06	4.16E-05	1.737099667	7.21E-05	0.002769196	protein odr-4 homolog [Brassica napus]	-	-	-	-
MSTRG.84161	--	9.13	12.57	10.12	5.55	9.54	6.31	31.21	63.47	20.84	38.5067	7.1333	10.6067	0.572323039	3.22E-06	8.06E-05	1.860136907	1.88E-06	0.000125749	PREDICTED: protein odr-4 homolog [Brassica oleracea var. oleracea] [Brassica oleracea]	-	-	-	-
MSTRG.84193	GIP	18.8	4.21	2.24	3.07	1.44	0.57	20.43	0.53	0.63	7.1967	1.6933	8.4167	2.313382986	0.000493663	0.006291541	-0.225920145	0.844629611	0.999767122	Integrase catalytic core [Arabidopsis thaliana x Arabidopsis arenosa]	-	-	-	-
MSTRG.84220	--	0.6	0.75	1.66	1.93	2.06	2	0.06	0	0	0.02	1.9967	1.0033	-0.992792516	0.46947096	0.879263373	-5.648657176	0.001619937	0.034228839	Transposon En/Spm-like [Arabidopsis suecica]	-	-	-	-
MSTRG.84243	COG2	0	0	0.05	2.61	2.65	2.37	0	0	0	0	2.5433	0.0167	-7.253611152	1.18E-07	4.12E-06	-4.058893689	0.982006263	0.999767122	-	-	-	-	-
MSTRG.84261	--	0.65	0.86	0.7	2.75	2.61	4.06	0.38	0.97	1.05	0.8	3.14	0.7367	-2.09168069	0.000119534	0.001895168	0.118988036	0.259262659	0.854845843	hypothetical protein HID58_087277 [Brassica napus]	-	-	-	-
MSTRG.84325	--	4.2	2.83	4.37	4.25	5.06	4.28	0.38	0.3	0.52	0.4	4.53	3.8	-0.253511632	0.209072969	0.59925225	-3.247927513	4.32E-06	0.000256622	hypothetical protein F2Q70_00038460 [Brassica cretica]	-	-	-	-
MSTRG.84336	At1g35537	0	0.07	0	3.57	2.23	0.46	0	0	0	0	2.0867	0.0233	-6.482663925	0.001882587	0.019178155	-4.544320516	1	1	defensin-like protein 32 [Brassica napus]	-	-	-	-
MSTRG.84340	At1g35537	0.71	0.22	0.22	5.36	3.7	4.29	0	0	0	0	4.45	0.3833	-3.537133976	1.12E-05	0.000238883	-8.582455645	0.167126199	0.719559845	defensin-like protein 32 [Brassica napus]	-	-	-	-
MSTRG.84343	--	0.87	1.33	0.59	0	0	0	0.79	0	1.29	0.6933	0	0.93	9.861086906	6.42E-05	0.001107428	-0.423681594	0.898929324	0.999767122	LOW QUALITY PROTEIN: hypothetical protein HID58_013523 [Brassica napus]	-	-	-	-
MSTRG.84379	--	1.05	5.37	0	0	0	0	1.71	0.11	0.89	0.9033	0	2.14	11.06339508	0.001817894	0.018626523	-1.244280446	0.68622599	0.999767122	-	-	-	-	-
MSTRG.84421	DSC2	1.18	0.77	0.1	0.15	0.1	0.22	0.4	0.09	0.45	0.3133	0.1567	0.6833	2.124891248	0.002992636	0.028163591	-1.124891248	0.631130062	0.999767122	PREDICTED: disease resistance protein TAO1-like [Brassica oleracea var. oleracea] [Brassica oleracea]	-	-	-	GO:0006950//response to stress;GO:0009617//response to bacterium
MSTRG.84498	--	0.91	0	0	10.04	219.34	66.14	0	0	0	0	98.5067	0.3033	-8.343173511	0.000422936	0.005507433	-8.244760234	0.384949053	0.963121982	spidroin-2 [Arabidopsis lyrata subsp. lyrata] [Arabidopsis lyrata]	-	-	-	-
MSTRG.84501	--	1.06	1.71	0	22.51	256.31	96.11	0	0	0	0	124.9767	0.9233	-7.080591481	1.82E-05	0.000368105	-9.85070776	0.123400716	0.628063371	spidroin-2 [Arabidopsis lyrata subsp. lyrata] [Arabidopsis lyrata]	-	-	-	-
MSTRG.84652	NAC086	2.8	2.34	1.66	1.09	0.6	0.66	0.76	0.78	0.44	0.66	0.7833	2.2667	1.53287399	5.15E-09	2.32E-07	-1.780034316	0.008154283	0.115625266	PREDICTED: LOW QUALITY PROTEIN: NAC domain-containing protein 86 [Brassica oleracea var. oleracea] [Brassica oleracea]	-	GO:0043231//intracellular membrane-bounded organelle	GO:0001071//nucleic acid binding transcription factor activity	GO:0010467//gene expression;GO:0034645//cellular macromolecule biosynthetic process;GO:0044707//single-multicellular organism process
MSTRG.84773	--	1.03	1.55	0.89	0.48	0.75	0.34	0.81	0.45	0.3	0.52	0.5233	1.1567	1.144171104	0.000639373	0.007847283	-1.153389634	0.406116453	0.974851658	translation initiation factor IF-2-like [Brassica rapa]	-	-	-	-
MSTRG.84793	YLMG1-2	23.18	24.37	24.14	11.86	10.51	10.55	12.37	12.51	19.65	14.8433	10.9733	23.8967	1.122807556	7.41E-73	3.50E-69	-0.68699428	0.731252884	0.999767122	ylmG homolog protein 1-2, chloroplastic-like [Brassica napus]	-	GO:0009526//plastid envelope;GO:0034357//photosynthetic membrane	GO:0016301//kinase activity;GO:0032550//purine ribonucleoside binding	GO:0006071//glycerol metabolic process;GO:0006221//pyrimidine nucleotide biosynthetic process;GO:0009062//fatty acid catabolic process;GO:0009617//response to bacterium;GO:0009628//response to abiotic stimulus;GO:0009636//response to toxic substance;GO:0009658//chloroplast organization;GO:0052646//alditol phosphate metabolic process
MSTRG.84862	--	0.04	0.15	0.04	0	0.1	0	0.63	0.9	0.34	0.6233	0.0333	0.0767	1.201633861	0.363830111	0.79174412	3.023332504	0.000342982	0.01002168	BnaC01g27690D [Brassica napus]	-	-	-	-
MSTRG.84866	F-ATMBP	239.27	261.16	199.2	16.9	12.22	3.96	549.12	792.27	486.39	609.26	11.0267	233.21	4.402561013	3.26E-23	7.88E-21	1.385428373	1.73E-09	2.83E-07	jacalin-related lectin 34 isoform X2 [Brassica rapa]	-	GO:0043231//intracellular membrane-bounded organelle;GO:0044444//cytoplasmic part	-	GO:0006950//response to stress
MSTRG.84867	JAL5	74.48	71.71	63.34	3.68	2.22	1.06	168.71	261.41	139.4	189.84	2.32	69.8433	4.911925704	8.91E-57	1.85E-53	1.442589686	1.88E-08	2.31E-06	myrosinase-binding protein [Brassica napus]	-	GO:0005911//cell-cell junction;GO:0043231//intracellular membrane-bounded organelle;GO:0044444//cytoplasmic part	GO:0046914//transition metal ion binding	GO:0001101//response to acid chemical;GO:0006950//response to stress;GO:0007165//signal transduction;GO:0009628//response to abiotic stimulus;GO:0009725//response to hormone;GO:0044237//cellular metabolic process;GO:0050790//regulation of catalytic activity;GO:0071704//organic substance metabolic process
MSTRG.84897	--	0	0.03	0	0	0	0	0.61	0.98	0.52	0.7033	0	0.01	3.321928095	0.702992851	0.960992109	6.136136688	2.74E-06	0.000174628	hypothetical protein DY000_02033844 [Brassica cretica]	-	-	-	-
MSTRG.84925	At3g47300	0.12	0.23	0.81	0	0	0	0.17	0.92	2.07	1.0533	0	0.3867	8.594946589	0.000106964	0.001725502	1.445799753	0.066558679	0.454900502	selT-like protein isoform X1 [Eutrema salsugineum]	-	GO:0016020//membrane;GO:0043231//intracellular membrane-bounded organelle	-	-
MSTRG.84932	--	1.81	2.12	0.97	18.31	47.56	20.53	0	0.33	0.23	0.1867	28.8	1.6333	-4.140177658	1.08E-11	7.29E-10	-3.129283017	0.02266801	0.233732514	Plant thionin family protein [Arabidopsis thaliana]	-	-	-	-
MSTRG.84983	--	1.81	1.28	0.75	0.73	0.51	0.31	0.73	0.71	0.45	0.63	0.5167	1.28	1.308838095	0.00088461	0.010215389	-1.022720077	0.497952024	0.999767122	twinkle homolog protein, chloroplastic/mitochondrial-like [Brassica napus]	-	-	-	-
MSTRG.85129	GATB	0.23	0.02	0.08	0.12	0	0	0.72	0.62	0.4	0.58	0.04	0.11	1.459431619	0.25572964	0.670497596	2.398549376	0.001245833	0.02805674	BnaC01g21430D [Brassica napus]	ko01100//Metabolic pathways;ko00970//Aminoacyl-tRNA biosynthesis	-	-	-
MSTRG.8518	--	0.37	0	0	0.84	26.85	9.12	0	0	0	0	12.27	0.1233	-6.636428669	8.90E-05	0.001467282	-6.94641896	0.5200787	0.999767122	BnaA05g32700D [Brassica napus]	-	-	-	-
MSTRG.8519	--	0	0	0	0.15	2.21	0.55	0	0	0	0	0.97	0	-9.921840937	0.000378935	0.005014073	0	1	1	BnaA05g32700D [Brassica napus]	-	-	-	-
MSTRG.8520	--	0	0.11	0.11	2.66	11.18	2.72	0	0	0	0	5.52	0.0733	-6.234055339	2.35E-05	0.000457756	-6.196397213	0.803919893	0.999767122	BnaA05g32700D [Brassica napus]	-	-	-	-
MSTRG.8521	--	0.27	0	0	0.72	8.85	3.76	0	0	0	0	4.4433	0.09	-5.625573563	0.001491734	0.015885843	-6.491853096	0.812238488	0.999767122	BnaA05g32700D [Brassica napus]	-	-	-	-
MSTRG.85310	--	2.47	1.71	3.25	0.04	0.06	0.03	2.42	1.39	2.16	1.99	0.0433	2.4767	5.836778682	2.93E-14	2.76E-12	-0.315631279	0.545476084	0.999767122	phosphatidylinositol 4-phosphate 5-kinase 1 isoform X3 [Brassica napus]	-	GO:0009536//plastid	GO:0016741//transferase activity, transferring one-carbon groups;GO:0016772//transferase activity, transferring phosphorus-containing groups	GO:0006796//phosphate-containing compound metabolic process
MSTRG.85426	--	0.04	0.7	0.17	4.2	1.73	2.41	0	0	0	0	2.78	0.3033	-3.196108933	0.002979547	0.028059053	-8.244760234	0.064528323	0.446404098	hypothetical protein IGI04_004054 [Brassica rapa subsp. trilocularis] [Brassica rapa]	-	-	-	-
MSTRG.85615	--	0.08	0.07	0.02	0	0	0	1.42	1.86	0.52	1.2667	0	0.0567	5.824428435	0.023997101	0.142388553	4.482392767	1.05E-08	1.38E-06	hypothetical protein F2Q70_00039729 [Brassica cretica]	-	-	-	-
MSTRG.85696	--	1.12	4.09	6.72	10.09	48.13	18.39	0.44	1.14	2.09	1.2233	25.5367	3.9767	-2.682938678	0.005905395	0.048389391	-1.700742075	0.224212506	0.808296261	unnamed protein product [Brassica napus]	-	-	-	-
MSTRG.85697	--	8.4	18.12	26.39	38.7	144.98	64.57	1.51	6.84	18.17	8.84	82.75	17.6367	-2.230181395	0.005067775	0.042856465	-0.996459642	0.663552567	0.999767122	defensin-like protein 112 [Capsella rubella]	-	-	-	-
MSTRG.85758	CYP705A22	0.07	0	0.08	1.96	1.43	2.69	0	0	0	0	2.0267	0.05	-5.341036918	2.65E-10	1.47E-08	-5.64385619	0.514819649	0.999767122	cytochrome P450 705A22-like isoform X1 [Brassica napus]	-	-	-	-
MSTRG.85780	--	0.9	0.03	0.07	0.06	0.01	0	0.76	0	0.12	0.2933	0.0233	0.3333	3.836501268	0.00500226	0.042424859	-0.184424571	0.865180157	0.999767122	Retrotransposon gag domain [Arabidopsis suecica]	-	-	-	-
MSTRG.85823	--	0.03	0.06	0.12	2.05	0.59	2.82	0	0	0	0	1.82	0.07	-4.700439718	1.38E-05	0.00028916	-6.129283017	0.315149126	0.911948262	At2g42590/F14N22.14 [Arabidopsis thaliana]	-	-	-	-
MSTRG.85885	--	8.91	1.9	0.93	1.67	0.78	0.29	6.2	0.11	2.3	2.87	0.9133	3.9133	2.09918461	0.004687176	0.040275117	-0.447347266	0.967267279	0.999767122	hypothetical protein F2Q69_00046757 [Brassica cretica]	-	-	-	-
MSTRG.85915	--	3.68	2.87	3.96	5.19	6.54	6.57	0.85	0.64	1.06	0.85	6.1	3.5033	-0.800080979	0.482407149	0.88848187	-2.043193517	0.000933404	0.022475103	hypothetical protein F2Q70_00001273 [Brassica cretica]	-	-	-	-
MSTRG.85989	--	0	0	0	0.58	4.28	1.59	0	0	0	0	2.15	0	-11.07012094	0.000144799	0.002224604	0	1	1	Defensin-like (DEFL) family protein [Arabidopsis thaliana]	-	-	-	-
MSTRG.85993	--	8.87	17.92	13.04	104.13	321.99	76.24	0.91	2.45	1.13	1.4967	167.4533	13.2767	-3.656794211	7.16E-08	2.59E-06	-3.14906813	2.83E-05	0.001266024	Defensin-like (DEFL) family protein [Arabidopsis thaliana]	-	-	-	-
MSTRG.86003	GSTT3	2.95	2.42	2.86	9.64	6.74	11.16	3.6	0.06	2.53	2.0633	9.18	2.7433	-1.742564224	8.93E-06	0.000196829	-0.410953021	0.909490022	0.999767122	glutathione S-transferase T3-like [Brassica napus]	-	-	-	-
MSTRG.86253	HMGA	2.4	0.61	0.55	1.28	0.98	0.8	6.4	10.59	1.47	6.1533	1.02	1.1867	0.218345588	0.249130466	0.660160778	2.374453407	0.00064533	0.016752236	BnaC02g34030D [Brassica napus]	-	GO:0000785//chromatin;GO:0043231//intracellular membrane-bounded organelle	GO:0003676//nucleic acid binding	GO:0010468//regulation of gene expression;GO:0034728//nucleosome organization;GO:0048869//cellular developmental process
MSTRG.86263	--	0.88	1	1.53	3.35	3.16	2.91	0.34	0.36	0.17	0.29	3.14	1.1367	-1.465955321	0.002411517	0.023579928	-1.970684433	0.008928483	0.123171623	PREDICTED: ATP-dependent DNA helicase PIF1-like [Raphanus sativus]	ko04136//Autophagy - other	-	-	-
MSTRG.86333	--	0	0	0	0.23	3.58	1.22	0	0	0	0	1.6767	0	-10.71138018	0.001115332	0.012479534	0	1	1	temperature-induced lipocalin-1 [Eutrema salsugineum]	-	-	-	-
MSTRG.86431	--	3.18	6.51	5.39	0.98	2.69	1.95	2.63	7.78	5.73	5.38	1.8733	5.0267	1.423994393	1.87E-05	0.000376211	0.09800415	0.208867482	0.786265773	unnamed protein product [Brassica napus]	-	-	-	-
MSTRG.86489	LCR52	0.13	0	0	0.18	14.43	2.94	0	0	0	0	5.85	0.0433	-7.076815597	0.001115742	0.012482471	-5.437405312	0.982006263	0.999767122	BnaCnng13610D [Brassica napus]	-	-	-	-
MSTRG.86509	--	5.13	1.11	4.05	0	0	0.1	11.28	7.2	12.96	10.48	0.0333	3.43	6.685099172	4.20E-08	1.58E-06	1.611358235	0.000555413	0.014805082	-	-	-	-	-
MSTRG.86520	--	0	0.42	0.12	0.66	8.36	3.95	0	0	0	0	4.3233	0.18	-4.586075262	0.001726975	0.017880124	-7.491853096	0.514092645	0.999767122	BnaC01g40490D [Brassica napus]	-	-	-	-
MSTRG.86744	--	44.3	35.97	41.6	17.18	15.68	7.73	33.9	55.34	38.02	42.42	13.53	40.6233	1.586146785	4.69E-12	3.36E-10	0.062435997	0.048405264	0.37512698	unnamed protein product [Brassica oleracea]	-	-	-	-
MSTRG.86887	--	0.14	0	0.08	0.39	4.41	1.35	0	0	0.2	0.0667	2.05	0.0733	-4.805010982	0.002634408	0.025339517	-0.137503524	0.903717048	0.999767122	BnaA08g03530D [Brassica napus]	-	-	-	-
MSTRG.86951	--	0.35	0.11	0.27	0	0.24	0.03	2.72	1.43	0.97	1.7067	0.09	0.2433	1.434937057	0.193038264	0.572685799	2.810175441	5.35E-06	0.000309104	Transposon En/Spm-like [Arabidopsis suecica]	-	-	-	-
MSTRG.86955	XYN4	0.4	0.03	0	30.8	8.33	29.91	0	0	0	0	23.0133	0.1433	-7.326951994	1.33E-05	0.000278777	-7.163230349	0.280194702	0.875905706	BnaAnng10280D [Brassica napus]	-	-	GO:0016798//hydrolase activity, acting on glycosyl bonds	GO:0044238//primary metabolic process
MSTRG.87338	PPF-1	0.79	1.14	0.16	7.65	4.01	3.88	0.46	0.05	0.16	0.2233	5.18	0.6967	-2.894411656	0.000786675	0.009269607	-1.641269942	0.350818197	0.940031225	inner membrane protein PPF-1, chloroplastic-like [Tripterygium wilfordii]	ko03060//Protein export	-	-	-
MSTRG.87372	--	0.12	0.43	0	2.51	20.52	2.85	0	0	0	0	8.6267	0.1833	-5.556262188	4.92E-05	0.000875972	-7.518325308	0.419613844	0.984127336	PREDICTED: pectinesterase inhibitor [Brassica oleracea var. oleracea] [Brassica oleracea]	-	GO:0009536//plastid	-	-
MSTRG.87444	--	7.33	7.66	9.17	11.94	9.03	15.78	1.1	0.49	2.38	1.3233	12.25	8.0533	-0.605123795	0.971856112	0.99353438	-2.605409542	0.0005881	0.015453804	hypothetical protein IGI04_006150 [Brassica rapa subsp. trilocularis] [Brassica rapa]	-	-	-	-
MSTRG.87582	RAD51	0	0.09	0.34	1.63	1.16	2.48	0.18	0	0	0.06	1.7567	0.1433	-3.615394397	0.003287104	0.030346698	-1.256339753	0.81893009	0.999767122	DNA repair protein RAD51 homolog 1-like [Brassica napus]	ko03440//Homologous recombination	GO:0043231//intracellular membrane-bounded organelle;GO:0043232//intracellular non-membrane-bounded organelle	GO:0003677//DNA binding;GO:0032550//purine ribonucleoside binding;GO:0042623//ATPase activity, coupled	GO:0000280//nuclear division;GO:0000724//double-strand break repair via homologous recombination;GO:0006260//DNA replication;GO:0006305//DNA alkylation;GO:0006325//chromatin organization;GO:0007049//cell cycle;GO:0010212//response to ionizing radiation;GO:0016458//gene silencing;GO:0048229//gametophyte development;GO:0051052//regulation of DNA metabolic process
MSTRG.87612	--	2.61	1.89	3.71	7.73	4.41	5.29	0.48	0.42	0.85	0.5833	5.81	2.7367	-1.086118442	0.183024768	0.554852591	-2.2300273	0.000442122	0.012363936	BnaC09g54350D [Brassica napus]	-	-	GO:0016740//transferase activity	-
MSTRG.87751	At2g46260	1.38	1.05	0.96	0.68	0.4	0.39	0.79	0.61	0.66	0.6867	0.49	1.13	1.205469118	3.89E-06	9.47E-05	-0.718640936	0.727255959	0.999767122	BnaC04g11990D [Brassica napus]	-	GO:0043231//intracellular membrane-bounded organelle	GO:0046983//protein dimerization activity	GO:0003002//regionalization;GO:0003006//developmental process involved in reproduction;GO:0009639//response to red or far red light
MSTRG.87895	At1g61610	3.59	5.67	0.54	1.37	0.18	0.3	1.4	0	1.65	1.0167	0.6167	3.2667	2.405256478	0.003624548	0.032774817	-1.683972507	0.40428658	0.973777801	BnaA01g22750D [Brassica napus]	-	-	GO:0004672//protein kinase activity;GO:0005488//binding	GO:0006796//phosphate-containing compound metabolic process;GO:0009692//ethylene metabolic process
MSTRG.88070	RE2	13.74	4.86	0	0	0.05	0.02	7.69	0.13	1.56	3.1267	0.0233	6.2	8.053731984	0.000575292	0.007186376	-0.987642793	0.788782611	0.999767122	Integrase catalytic core [Arabidopsis suecica]	-	-	-	-
MSTRG.88194	--	1.56	2.95	1.99	6.79	20.6	7.99	0.33	0.44	1.02	0.5967	11.7933	2.1667	-2.444422425	0.000389951	0.005135831	-1.860480131	0.04736223	0.3702857	Expressed protein [Arabidopsis thaliana]	-	-	-	-
MSTRG.88196	--	2.35	1.79	3.01	2.62	2.46	1.25	0.03	0.39	0.28	0.2333	2.11	2.3833	0.175737742	0.049344517	0.239633485	-3.352516415	0.000651049	0.016846319	BnaC02g31260D [Brassica napus]	ko03420//Nucleotide excision repair;ko03440//Homologous recombination;ko03030//DNA replication;ko03430//Mismatch repair	-	-	-
MSTRG.88199	--	4.65	10.31	7.46	27.61	47.93	29.77	0.7	0.74	0.76	0.7333	35.1033	7.4733	-2.231784255	1.21E-05	0.000256287	-3.349210849	1.14E-06	8.09E-05	BnaA06g16040D [Brassica napus]	-	-	-	-
MSTRG.882	REM4	0.2	0.19	0.27	1.43	1.29	1.59	0.02	0.02	0	0.0133	1.4367	0.22	-2.70714994	3.15E-08	1.22E-06	-4.044394119	0.015156387	0.177922041	BnaA01g34750D [Brassica napus]	-	GO:0043231//intracellular membrane-bounded organelle	GO:0001071//nucleic acid binding transcription factor activity;GO:0003676//nucleic acid binding	GO:0010468//regulation of gene expression;GO:0034645//cellular macromolecule biosynthetic process
MSTRG.88283	--	3.4	3.15	2.29	0.13	0.16	0	4.02	3.46	3.42	3.6333	0.0967	2.9467	4.929921564	7.53E-13	5.90E-11	0.30220986	0.011281331	0.145776564	hypothetical protein F2Q70_00030091 [Brassica cretica]	-	-	-	-
MSTRG.8836	HIPP06	4.99	7.94	11.86	0.42	2.75	1.47	2.58	3.42	3.58	3.1933	1.5467	8.2633	2.417561561	1.60E-06	4.31E-05	-1.37166071	0.07977452	0.500868818	heavy metal-associated isoprenylated plant protein 6 [Brassica rapa]	-	-	GO:0046872//metal ion binding	GO:0006812//cation transport;GO:0010243//response to organonitrogen compound
MSTRG.88449	SOT1	0	0	0	3.99	0	1.47	0	0	0	0	1.82	0	-10.82972274	0.002602221	0.025112345	0	1	1	PREDICTED: cytosolic sulfotransferase 1-like [Brassica oleracea var. oleracea] [Brassica oleracea]	-	GO:0005737//cytoplasm	GO:0008146//sulfotransferase activity	GO:0006468//protein phosphorylation;GO:0009755//hormone-mediated signaling pathway;GO:0016128//phytosteroid metabolic process
MSTRG.88554	--	0	0	0	0.52	0.4	1.4	0	0	0	0	0.7733	0	-9.594946589	8.54E-05	0.001414428	0	1	1	protein SAD1/UNC-84 domain protein 2-like [Brassica napus]	-	-	-	-
MSTRG.88714	--	0.82	0.95	0.64	0.4	0.14	0.28	0.41	0.2	0.41	0.34	0.2733	0.8033	1.555337332	0.003289518	0.030359096	-1.240463994	0.434461249	0.992229221	-	-	-	-	-
MSTRG.88748	SFH13	1.65	2.56	1.86	3.31	1.48	2.58	0.09	0.11	0.18	0.1267	2.4567	2.0233	-0.279968103	0.35798329	0.787059765	-3.997625193	1.70E-10	3.60E-08	phosphatidylinositol/phosphatidylcholine transfer protein SFH13 isoform X2 [Brassica rapa]	-	-	-	-
MSTRG.88862	GSTT3	1.66	1.41	2.47	7.36	2.47	4.68	0.2	0.2	0.54	0.3133	4.8367	1.8467	-1.389089638	0.085595989	0.347856763	-2.559153314	0.000398799	0.011387039	Harbinger transposase-derived protein [Arabidopsis suecica]	-	-	-	-
MSTRG.88891	--	7.87	2.91	3.95	0.23	2.2	0.31	2.78	0.93	6.79	3.5	0.9133	4.91	2.426509632	0.000286682	0.003963317	-0.488368102	0.930203573	0.999767122	BnaA04g07310D [Brassica napus]	ko03420//Nucleotide excision repair;ko03440//Homologous recombination;ko03030//DNA replication;ko03430//Mismatch repair	-	-	-
MSTRG.88918	--	2.91	0.8	2.23	0.11	0	0.47	0.37	0.44	0.69	0.5	0.1933	1.98	3.356338126	0.000396429	0.005210971	-1.98550043	0.097724397	0.559404512	BnaA10g09930D [Brassica napus]	-	-	-	-
MSTRG.8916	LCR81	0.43	2.21	0	15.3	74.01	12.45	0	0	0	0	33.92	0.88	-5.268488836	6.48E-05	0.001116403	-9.781359714	0.166170194	0.717530282	low-molecular-weight cysteine-rich 81 [Arabidopsis thaliana]	-	-	-	GO:0006950//response to stress;GO:0051704//multi-organism process
MSTRG.89384	--	0	0.12	0	0.37	0.89	1.38	0.12	0.36	0	0.16	0.88	0.04	-4.459431619	0.005333711	0.044669244	2	0.30592446	0.903587199	hypothetical protein DY000_02035122 [Brassica cretica]	-	-	-	-
MSTRG.89404	--	0	0.11	0.25	0.85	5.36	1.09	0	0.14	0	0.0467	2.4333	0.12	-4.341827652	0.004580198	0.039539803	-1.362570079	0.844136809	0.999767122	BnaCnng68060D [Brassica napus]	-	-	-	-
MSTRG.89448	ANNAT7	0.28	0.44	0.33	11.09	6.33	14.28	0.09	0	0.08	0.0567	10.5667	0.35	-4.916021607	1.43E-19	2.51E-17	-2.626782676	0.061481426	0.434042347	AT5G10220-like protein [Arabidopsis arenosa]	-	GO:0005576//extracellular region;GO:0009536//plastid	GO:0005543//phospholipid binding;GO:0046872//metal ion binding	GO:0006637//acyl-CoA metabolic process;GO:0006970//response to osmotic stress;GO:0008643//carbohydrate transport;GO:0009416//response to light stimulus;GO:0016129//phytosteroid biosynthetic process;GO:0030001//metal ion transport;GO:0044763//single-organism cellular process
MSTRG.89456	--	1.76	2.12	1.19	1.35	1.85	2.22	0.4	0.23	0.4	0.3433	1.8067	1.69	-0.096307104	0.151661475	0.498427713	-2.29934141	0.000971817	0.023127515	hypothetical protein Bca52824_056799 [Brassica carinata]	-	-	-	-
MSTRG.89459	--	0.1	0	0.05	0	0	0.05	1.04	2.64	0.41	1.3633	0.0167	0.05	1.584962501	0.398878505	0.823344529	4.769066437	5.75E-05	0.002292564	BnaUnng04820D [Brassica napus]	ko03420//Nucleotide excision repair;ko03440//Homologous recombination;ko03030//DNA replication;ko03430//Mismatch repair	-	-	-
MSTRG.89569	--	0	0	0	0.36	0.26	1.22	0	0	0	0	0.6133	0	-9.26052755	0.001131617	0.012630151	0	1	1	protein ALP1-like isoform X1 [Brassica rapa]	-	-	-	-
MSTRG.89767	--	1.67	1.25	0	0	0	0	0	0	0	0	0	0.9733	9.926790153	0.004235635	0.037138727	-9.926790153	0.05746435	0.416849445	hypothetical protein IGI04_006150 [Brassica rapa subsp. trilocularis] [Brassica rapa]	-	-	-	-
MSTRG.89875	--	3.91	8.95	8.59	34.62	100.09	46.36	0.16	1.55	3.99	1.9	60.3567	7.15	-3.077497985	9.57E-07	2.72E-05	-1.911943823	0.21665347	0.797908317	defensin-like protein 112 [Capsella rubella]	-	-	-	-
MSTRG.89893	--	0.73	0.75	1.47	5.97	2.62	3.61	0.81	1.07	0.41	0.7633	4.0667	0.9833	-2.048094288	0.003782867	0.033896231	-0.365367356	0.70202142	0.999767122	BnaA10g27460D [Brassica napus]	-	-	-	-
MSTRG.89982	GLB3	0.84	1.47	1.92	0.28	0.66	0.9	0.69	1.34	0.87	0.9667	0.6133	1.41	1.200951897	0.001243124	0.013650592	-0.544604763	0.887493923	0.999767122	BnaA05g15640D [Brassica napus]	-	GO:0016020//membrane	GO:0022892//substrate-specific transporter activity;GO:0046906//tetrapyrrole binding;GO:0046914//transition metal ion binding	GO:0006950//response to stress;GO:0009725//response to hormone;GO:0015669//gas transport
MSTRG.90161	MEKK1	0.19	0.26	0.12	0.41	1.32	1.5	0.06	0.19	0.2	0.15	1.0767	0.19	-2.502500341	0.003006793	0.028271769	-0.341036918	0.739739214	0.999767122	BnaC03g30930D [Brassica napus]	ko04626//Plant-pathogen interaction;ko04016//MAPK signaling pathway - plant	GO:0009526//plastid envelope	GO:0003676//nucleic acid binding;GO:0004702//receptor signaling protein serine/threonine kinase activity;GO:0019899//enzyme binding;GO:0032550//purine ribonucleoside binding	GO:0006468//protein phosphorylation;GO:0006725//cellular aromatic compound metabolic process;GO:0006952//defense response;GO:0006970//response to osmotic stress;GO:0009555//pollen development;GO:0009620//response to fungus;GO:0009755//hormone-mediated signaling pathway;GO:0009863//salicylic acid mediated signaling pathway;GO:0010038//response to metal ion;GO:0032787//monocarboxylic acid metabolic…
MSTRG.90214	--	22.27	22.87	26.46	7.42	9.43	8.7	23.05	33.13	26.6	27.5933	8.5167	23.8667	1.486636296	2.54E-38	2.23E-35	0.209322661	0.005109355	0.082324325	unnamed protein product [Brassica napus]	-	-	-	-
MSTRG.90316	--	52.66	166	238	74.97	59.08	67.6	24.79	67.35	119.72	70.62	67.2167	152.22	1.17926702	0.000281528	0.003904767	-1.108009199	0.512771977	0.999767122	BnaC01g38920D [Brassica napus]	-	-	-	-
MSTRG.90414	--	1.84	6.2	4.24	9.59	37.3	14.72	0.46	1.65	2.18	1.43	20.5367	4.0933	-2.326853975	0.005073879	0.042887831	-1.517261008	0.239425135	0.827675651	Defensin-like (DEFL) family protein [Arabidopsis thaliana]	-	-	-	-
MSTRG.90488	--	0.19	0.1	0	1.32	4.48	2.65	0	0	0	0	2.8167	0.0967	-4.864826536	0.000219351	0.003171257	-6.594946589	0.69750171	0.999767122	unnamed protein product [Brassica napus]	-	-	-	-
MSTRG.90513	--	0.83	0.09	0	1.24	47.64	10	0	0	0	0	19.6267	0.3067	-6	0.000213664	0.003098536	-8.26052755	0.379478627	0.962303817	BnaC06g31010D [Brassica napus]	-	-	-	-
MSTRG.90622	PDCB2	0.07	0.1	0.17	4.58	1.55	1.19	0	0	0	0	2.44	0.1133	-4.428236997	0.000679925	0.008233162	-6.824428435	0.536346051	0.999767122	PLASMODESMATA CALLOSE-BINDING PROTEIN 2 [Brassica napus]	-	GO:0005911//cell-cell junction;GO:0031225//anchored component of membrane	GO:0030247//polysaccharide binding	GO:0006950//response to stress
MSTRG.90624	--	0.57	0.58	0.92	2.9	1.93	3.83	0.56	0	0.09	0.2167	2.8867	0.69	-2.064736257	0.00528692	0.044365332	-1.671119144	0.404224617	0.973727376	Integrase catalytic core [Arabidopsis suecica]	-	-	-	-
MSTRG.90741	PUMP1	0.17	0.18	0.36	2.6	0.99	2.3	0	0	0	0	1.9633	0.2367	-3.052376704	0.000148335	0.002271294	-7.886712714	0.03096781	0.284448704	mitochondrial uncoupling protein 1 isoform X2 [Brassica rapa]	-	GO:0005911//cell-cell junction;GO:0009536//plastid;GO:0019866//organelle inner membrane	GO:0022857//transmembrane transporter activity	GO:0006006//glucose metabolic process;GO:0009746//response to hexose;GO:0034285//response to disaccharide;GO:0043094//cellular metabolic compound salvage;GO:0044765//single-organism transport
MSTRG.90968	--	0.85	0.7	0.45	0.18	0.19	0.18	0.22	0	0.18	0.1333	0.1833	0.6667	1.862496476	3.95E-05	0.000722698	-2.321928095	0.081611274	0.507531011	protein WVD2-like 7 isoform X3 [Brassica napus]	-	GO:0005911//cell-cell junction	-	-
MSTRG.91149	--	0.58	1.21	2.07	0.25	0.65	0.41	0.6	0.54	0.16	0.4333	0.4367	1.2867	1.559034036	0.001170283	0.012986661	-1.570089224	0.212980322	0.793409008	protein ASPARTIC PROTEASE IN GUARD CELL 2-like isoform X1 [Brassica napus]	-	GO:0009536//plastid	GO:0016787//hydrolase activity	GO:0019538//protein metabolic process
MSTRG.91176	--	0	0.91	0.91	0	0	0	1.25	0	0	0.4167	0	0.6067	9.244760234	0.003315285	0.030514036	-0.542010356	0.99866349	0.999767122	pentatricopeptide repeat-containing protein At3g46790, chloroplastic [Arabidopsis lyrata subsp. lyrata] [Arabidopsis lyrata]	-	-	-	-
MSTRG.91185	--	6.81	9.66	15.77	58.27	47.78	71.36	0.19	1.58	1.68	1.15	59.1367	10.7467	-2.460163683	1.25E-07	4.33E-06	-3.224183477	0.001536255	0.032932071	hypothetical protein HID58_010773 [Brassica napus]	-	-	-	-
MSTRG.91191	--	2.47	1.43	1.83	1.03	1.29	0.84	0.13	0.15	0.46	0.2467	1.0533	1.91	0.858610581	0.00014058	0.002170532	-2.952937963	0.000723155	0.0183399	F3M18.3 [Arabidopsis thaliana]	-	-	-	GO:0044238//primary metabolic process;GO:0044249//cellular biosynthetic process;GO:1901576//organic substance biosynthetic process
MSTRG.91258	--	0.47	0.28	0.61	0.14	0.15	0.05	0	0.07	0.29	0.12	0.1133	0.4533	2	0.00420338	0.036928303	-1.91753784	0.315999684	0.912521924	BnaC03g58990D [Brassica napus]	-	-	-	-
MSTRG.91301	At4g15430	11.01	8.17	10.44	7.19	3.22	5.72	2.32	0.98	2.35	1.8833	5.3767	9.8733	0.876825202	6.93E-06	0.000157529	-2.390248868	8.20E-06	0.000447786	BnaA07g02900D [Brassica napus]	-	GO:0016020//membrane	-	GO:0001101//response to acid chemical;GO:0006970//response to osmotic stress;GO:0009725//response to hormone;GO:0010468//regulation of gene expression;GO:0048511//rhythmic process;GO:0048571//long-day photoperiodism
MSTRG.91313	--	1.97	2.4	0.37	11.91	22.21	18.22	0	0	0.06	0.02	17.4467	1.58	-3.46495496	5.69E-06	0.000132801	-6.303780748	0.000296252	0.008853206	Retrotransposon gag domain [Arabidopsis thaliana x Arabidopsis arenosa]	-	-	-	-
MSTRG.91314	--	1.09	0.36	0.35	5.71	5.29	6.65	0	0	0	0	5.8833	0.6	-3.293599372	5.88E-06	0.000136495	-9.22881869	0.07588327	0.488303294	Retrotransposon gag domain [Arabidopsis thaliana x Arabidopsis arenosa]	-	-	-	-
MSTRG.91437	--	0	0	0	0.15	2.21	0.55	0	0	0	0	0.97	0	-9.921840937	0.000378935	0.005014073	0	1	1	BnaA05g32700D [Brassica napus]	-	-	-	-
MSTRG.9149	--	2.28	2.82	1.13	0.69	0.47	0.17	1.82	2.01	1.06	1.63	0.4433	2.0767	2.227805918	3.35E-06	8.36E-05	-0.349397698	0.632222699	0.999767122	hypothetical protein N665_0714s0014 [Sinapis alba]	-	-	-	-
MSTRG.9154	--	64.78	30.13	33.32	21.96	6.93	7.07	77.55	51.13	40.71	56.4633	11.9867	42.7433	1.834268901	6.71E-06	0.000153206	0.401614881	0.031841559	0.289751428	unnamed protein product [Brassica napus]	-	-	-	-
MSTRG.91582	--	0.77	1.01	3.08	0.03	0	0	1.22	0.03	6.16	2.47	0.01	1.62	7.339850003	3.56E-06	8.82E-05	0.608517229	0.215229699	0.795850489	methylsterol monooxygenase 2-1-like [Brassica napus]	ko01100//Metabolic pathways;ko01110//Biosynthesis of secondary metabolites;ko00100//Steroid biosynthesis	-	-	-
MSTRG.91598	--	21.97	23.19	17.62	9.41	5.77	4.28	26.66	33.1	33.44	31.0667	6.4867	20.9267	1.689793319	5.47E-13	4.35E-11	0.570024926	9.49E-06	0.000504867	unnamed protein product, partial [Brassica napus]	-	-	-	-
MSTRG.91724	--	7.98	15.99	15.71	57.14	111.01	35.08	1.13	7.38	5.31	4.6067	67.7433	13.2267	-2.356629452	0.000299936	0.004123751	-1.52165441	0.249753898	0.843633779	PREDICTED: defensin-like protein 276 [Camelina sativa]	-	-	-	-
MSTRG.91828	MES19	7.37	8	9.96	19.73	14.29	23.25	3.25	1.2	2.29	2.2467	19.09	8.4433	-1.176932526	0.025650733	0.149565158	-1.910026581	0.001323487	0.029471376	methylesterase 4 isoform X2 [Eutrema salsugineum]	-	-	GO:0005488//binding;GO:0052689//carboxylic ester hydrolase activity	GO:0000097//sulfur amino acid biosynthetic process;GO:0006355//regulation of transcription, DNA-templated;GO:0006605//protein targeting;GO:0006970//response to osmotic stress;GO:0009746//response to hexose;GO:0009814//defense response, incompatible interaction;GO:0009891//positive regulation of biosynthetic process;GO:0018958//phenol-containing compound metabolic process;GO:0032787//monocarboxyli…
MSTRG.91942	--	4.35	3.58	5.87	2.39	1.9	1.76	2.51	1.34	2.16	2.0033	2.0167	4.6	1.18966122	2.73E-08	1.07E-06	-1.199231371	0.156946565	0.699431141	-	-	-	-	-
MSTRG.92053	--	0.05	0.19	0.11	2.45	1.82	2.43	0	0	0	0	2.2333	0.1167	-4.258734268	5.87E-14	5.30E-12	-6.866248611	0.042570335	0.348164376	hypothetical protein VOLCADRAFT_65252, partial [Volvox carteri f. nagariensis]	-	-	-	-
MSTRG.92069	SPH11	6.52	10.81	25.01	49.48	35.33	90.73	0.22	0.14	1.02	0.46	58.5133	14.1133	-2.051706638	0.00973733	0.071924208	-4.939281097	7.58E-07	5.77E-05	BnaC04g43640D [Brassica napus]	-	-	-	-
MSTRG.92102	--	25.58	31.13	27.33	13.23	13.39	11.27	28.65	35.82	25.26	29.91	12.63	28.0133	1.149259022	2.10E-40	2.15E-37	0.094514249	0.010511818	0.138716472	hypothetical protein F2Q68_00019948 [Brassica cretica]	-	-	-	-
MSTRG.92114	--	1.71	1.58	1.62	7.3	4.08	5.72	2.47	0.49	2.13	1.6967	5.7	1.6367	-1.800201395	0.000228747	0.003285311	0.051942632	0.340692783	0.931662449	desiccation-related protein PCC13-62 [Eutrema salsugineum]	-	-	-	-
MSTRG.92260	At5g53635	0.17	0.37	0.09	1.43	2.3	0.94	0.4	0	0.17	0.19	1.5567	0.21	-2.889998816	0.002740041	0.026180727	-0.144389909	0.836019949	0.999767122	BnaC03g15250D [Brassica napus]	-	-	-	GO:0007126//meiotic nuclear division;GO:0043170//macromolecule metabolic process;GO:0044237//cellular metabolic process;GO:0044238//primary metabolic process;GO:1902589//single-organism organelle organization;GO:1903046//meiotic cell cycle process
MSTRG.92307	LCR63	0.41	0.81	0.3	1.59	7.81	2.52	0	0	0	0	3.9733	0.5067	-2.971241007	0.004140394	0.036484323	-8.984893108	0.029128918	0.273912734	defensin-like protein 171 [Brassica napus]	-	-	-	-
MSTRG.92309	LCR63	0.1	0.63	0.32	1.2	13.3	3.13	0	0	0	0	5.8767	0.35	-4.069571242	0.001738231	0.017981329	-8.451211112	0.202361564	0.775879553	defensin-like protein 171 [Brassica napus]	-	-	-	-
MSTRG.92345	At4g19870	0.54	0.72	0.66	0.79	0.79	1.08	0.08	0.06	0	0.0467	0.8867	0.64	-0.470319935	0.763593383	0.980469753	-3.777607579	0.001414918	0.03101547	F-box/kelch-repeat protein At4g19870-like [Brassica napus]	-	GO:0043231//intracellular membrane-bounded organelle	-	-
MSTRG.92353	--	0.13	0.06	0.09	1.23	0.67	2.51	0.06	0.11	0.11	0.0933	1.47	0.0933	-3.977279923	3.64E-05	0.000671526	0	0.613270697	0.999767122	BnaC02g24130D [Brassica napus]	-	-	-	-
MSTRG.92357	--	91.7	57.55	85.15	13.18	17.38	7.79	127.9	146.01	83.71	119.2067	12.7833	78.1333	2.611674087	9.86E-21	1.89E-18	0.609454852	0.001380712	0.030462441	-	-	-	-	-
MSTRG.92371	Os03g0733400	3.69	4.66	4.91	8.87	9.27	9	4.19	5.19	4.37	4.5833	9.0467	4.42	-1.033339945	0.003017979	0.028351851	0.052350843	0.014664571	0.174055487	PREDICTED: zinc finger BED domain-containing protein DAYSLEEPER-like [Brassica oleracea var. oleracea] [Brassica oleracea]	-	-	GO:0005488//binding	-
MSTRG.92474	--	0.61	3.14	0	0	0	0	0	0.09	0	0.03	0	1.25	10.28771238	0.004277338	0.037427146	-5.380821784	0.053197155	0.397764859	transmembrane protein [Arabidopsis thaliana]	-	-	-	-
MSTRG.92568	--	8.34	20.34	25.76	38.47	119.38	83.23	1.08	2.11	7.83	3.6733	80.36	18.1467	-2.146772998	0.003899224	0.0347629	-2.304542843	0.044733352	0.358297999	defensin-like protein 112 [Capsella rubella]	-	-	-	-
MSTRG.92622	WNK9	3.06	3.41	2.37	4.85	4.05	3.95	0.87	0.27	0.38	0.5067	4.2833	2.9467	-0.539650085	0.726588772	0.968344837	-2.539975046	0.00016142	0.005420645	probable serine/threonine-protein kinase WNK9 [Brassica napus]	-	GO:0016020//membrane;GO:0044464//cell part	GO:0004672//protein kinase activity	GO:0006464//cellular protein modification process;GO:0016310//phosphorylation;GO:0048511//rhythmic process
MSTRG.92636	--	0.76	0.82	0.47	6.06	4.41	3.18	0.36	1.16	0.15	0.5567	4.55	0.6833	-2.735205136	0.000233211	0.003339032	-0.295775807	0.762703442	0.999767122	PREDICTED: probable histone H2A.7 [Raphanus sativus]	-	GO:0000775//chromosome, centromeric region;GO:0000785//chromatin;GO:0005911//cell-cell junction;GO:0043231//intracellular membrane-bounded organelle	GO:0005488//binding	GO:0006325//chromatin organization;GO:0044699//single-organism process
MSTRG.92787	CP29B	1.16	1.29	0.7	0.7	0.76	0.64	2.92	6.11	1.9	3.6433	0.7	1.05	0.584962501	0.001743811	0.018021497	1.794869667	7.77E-05	0.002943671	RNA-binding protein CP29B, chloroplastic [Brassica napus]	-	GO:0009526//plastid envelope;GO:0009532//plastid stroma;GO:0031976//plastid thylakoid;GO:0032991//macromolecular complex;GO:0044434//chloroplast part	GO:0008187//poly-pyrimidine tract binding;GO:0036094//small molecule binding	GO:0001101//response to acid chemical;GO:0006091//generation of precursor metabolites and energy;GO:0006396//RNA processing;GO:0009409//response to cold;GO:0009617//response to bacterium;GO:0009696//salicylic acid metabolic process;GO:0043487//regulation of RNA stability;GO:0045087//innate immune response;GO:0048511//rhythmic process
MSTRG.92977	STP8	0	0	0	0.25	0.75	0.46	0	0	0	0	0.4867	0	-8.926790153	0.000414567	0.005415887	0	1	1	sugar transport protein 8 [Brassica rapa]	-	GO:0031224//intrinsic component of membrane	GO:0015291//secondary active transmembrane transporter activity;GO:0016628//oxidoreductase activity, acting on the CH-CH group of donors, NAD or NADP as acceptor;GO:0051119//sugar transmembrane transporter activity	GO:0006812//cation transport;GO:0008643//carbohydrate transport;GO:0044710//single-organism metabolic process;GO:0044763//single-organism cellular process
MSTRG.9441	--	0	0	0	0.45	2.02	0.39	0	0	0	0	0.9533	0	-9.896836931	0.003269409	0.030199745	0	1	1	BnaC06g05010D [Brassica napus]	-	-	-	-
MSTRG.9678	--	0.36	0.7	0.71	0.16	0.25	0.22	0.07	0.08	0	0.05	0.21	0.59	1.490325627	0.006120199	0.049851495	-3.560714954	0.037484007	0.321676119	hypothetical protein IGI04_032586 [Brassica rapa subsp. trilocularis] [Brassica rapa]	-	-	-	-
MSTRG.9855	--	6.72	5.91	7.99	5.34	2.04	2.47	4.03	2.52	2.78	3.11	3.2833	6.8733	1.065848703	5.23E-05	0.00092407	-1.144095347	0.080478922	0.503473957	BnaA02g06360D [Brassica napus]	-	GO:0009536//plastid	-	-
ncbi_106345165	LOC106345165	0.65	0.21	0.92	0	0.16	0.15	0.38	0.86	0.78	0.6733	0.1033	0.5933	2.521537121	0.002045998	0.020559412	0.182478052	0.310073054	0.906612905	protein BREVIS RADIX-like [Brassica rapa]	-	-	-	GO:0048528//post-embryonic root development
ncbi_106345173	LOC106345173	0	0	0	0.53	14.66	2.16	0	0	0	0	5.7833	0	-12.49768554	2.86E-06	7.27E-05	0	1	1	probable ubiquitin-conjugating enzyme E2 31 [Brassica rapa]	-	-	-	GO:0044267//cellular protein metabolic process
ncbi_106345178	LOC106345178	3.69	2.04	10.28	35.72	23.15	47.36	0.13	0.04	0.37	0.18	35.41	5.3367	-2.730146037	0.00034508	0.004640074	-4.88987009	4.88E-06	0.000285601	BnaA05g36360D [Brassica napus]	-	-	GO:0016741//transferase activity, transferring one-carbon groups	-
ncbi_106345199	LOC106345199	1.99	3.01	1.96	0.48	1.14	0.45	3.23	3.94	5.66	4.2767	0.69	2.32	1.749456538	1.33E-07	4.57E-06	0.882361959	7.08E-05	0.002722449	ABC transporter A family member 8 isoform X4 [Brassica rapa]	-	-	GO:0032550//purine ribonucleoside binding	-
ncbi_106345209	LOC106345209	0.29	1.1	0.39	0.1	0	0	0.16	0	0.1	0.0867	0.0333	0.5933	4.153805336	0.00130172	0.014174971	-2.775293713	0.141490148	0.666634383	uncharacterized protein LOC103833077 [Brassica rapa]	-	-	-	-
ncbi_106345211	LOC106345211	18.64	14.78	6.79	284.67	43.19	187.92	1.11	0.32	1.39	0.94	171.9267	13.4033	-3.681129591	3.95E-06	9.61E-05	-3.833787268	6.65E-07	5.19E-05	MLP-like protein 328 [Brassica rapa]	-	-	GO:0046914//transition metal ion binding	-
ncbi_106345212	LOC106345212	0.39	1.05	0.37	0.2	0.05	0.23	0.05	0.2	0.27	0.1733	0.16	0.6033	1.914883386	0.0058322	0.047909733	-1.799406169	0.258810345	0.854286835	BnaC09g52190D [Brassica napus]	-	GO:0043231//intracellular membrane-bounded organelle	-	-
ncbi_106345222	LOC106345222	0.4	0.23	0.52	0	0	0	0	0	0	0	0	0.3833	8.582455645	4.65E-06	0.000111	-8.582455645	0.002886627	0.053315858	GDSL esterase/lipase At1g33811 [Brassica rapa]	-	-	-	GO:0044238//primary metabolic process
ncbi_106345228	LOC106345228	2.06	1.57	1.79	1.39	0.69	0.51	2.89	3.39	1.99	2.7567	0.8633	1.8067	1.065340754	0.000501063	0.006372471	0.609594478	0.005190893	0.083193247	BnaA05g21020D [Brassica napus]	-	-	-	GO:0044786//cell cycle DNA replication
ncbi_106345241	LOC106345241	1.34	0	0.99	0.03	0	0	6.97	2.55	5.32	4.9467	0.01	0.7767	6.279223644	0.000178763	0.002660579	2.671089232	0.013303474	0.162900316	BnaCnng23260D [Brassica napus]	ko01100//Metabolic pathways;ko00500//Starch and sucrose metabolism	-	-	GO:0048856//anatomical structure development
ncbi_106345253	LOC106345253	0	0.17	0.16	0.39	4.5	1.72	0	0	0	0	2.2033	0.11	-4.324112342	0.001777559	0.018276917	-6.781359714	0.251509942	0.845921506	BnaAnng28410D [Brassica napus]	-	-	-	-
ncbi_106345256	LOC106345256	0.06	0.06	0	0.41	0.78	0.83	0	0	0	0	0.6733	0.04	-4.073248982	0.000550204	0.006918747	-5.321928095	0.619571804	0.999767122	BnaCnng55580D [Brassica napus]	-	-	-	-
ncbi_106345259	LOC106345259	0.21	0.41	0.05	0	0.2	0	4.29	5.17	5.13	4.8633	0.0667	0.2233	1.744161096	0.194503636	0.575526235	4.444674977	9.34E-15	5.24E-12	NAC domain-containing protein 100-like [Brassica rapa]	-	-	-	GO:0044707//single-multicellular organism process
ncbi_106345326	LOC106345326	0.1	0.17	0.21	1.13	1.41	0.63	0	0.04	0.13	0.0567	1.0567	0.16	-2.723376529	0.001285721	0.014043369	-1.497499659	0.558356842	0.999767122	B3 domain-containing protein At3g17010-like [Brassica rapa]	-	GO:0043231//intracellular membrane-bounded organelle	-	-
ncbi_106345334	BNAA05G22790D	0.7	0.99	0.87	3.31	3.13	3.82	0.33	0.39	1.02	0.58	3.42	0.8533	-2.002815016	9.37E-06	0.000204906	-0.557056504	0.97083762	0.999767122	BnaA05g22790D [Brassica napus]	-	-	GO:0001871//pattern binding	-
ncbi_106345344	LOC106345344	0.04	0.02	0.05	0.49	0.59	0.54	0.02	0	0	0.0067	0.54	0.0367	-3.880418384	6.04E-06	0.000139556	-2.459431619	0.558828274	0.999767122	BnaC05g37040D [Brassica napus]	ko04120//Ubiquitin mediated proteolysis	-	-	GO:0019953//sexual reproduction
ncbi_106345345	LOC106345345	0.11	0.17	0	1.74	1.29	1.52	0.05	0.03	0	0.0267	1.5167	0.0933	-4.022367813	3.77E-05	0.000692596	-1.807354922	0.526783698	0.999767122	BnaC05g37060D [Brassica napus]	-	GO:0031224//intrinsic component of membrane	-	-
ncbi_106345359	LOC106345359	10.27	5.49	0.62	0.06	0.16	0	84.24	60.1	33	59.1133	0.0733	5.46	6.218288023	2.87E-09	1.36E-07	3.436510719	7.08E-06	0.000394037	BnaA04g26290D [Brassica napus]	-	-	GO:0046914//transition metal ion binding	-
ncbi_106345389	BNAC03G65020D	1.13	1.16	0.88	0.53	0.4	1.22	0.17	0	0.16	0.11	0.7167	1.0567	0.560146181	0.040662811	0.20873249	-3.263944911	0.002573894	0.048892579	BnaC03g65020D [Brassica napus]	-	GO:0043231//intracellular membrane-bounded organelle	-	-
ncbi_106345423	LOC106345423	9.28	7.57	18.67	28.76	20.36	32.58	1.41	1.26	3.22	1.9633	27.2333	11.84	-1.201704497	0.150135077	0.495108372	-2.592292043	0.000848578	0.020776629	plant invertase/pectin methylesterase inhibitor domain-containing protein [Arabidopsis thaliana]	-	-	GO:0052689//carboxylic ester hydrolase activity	-
ncbi_106345424	LOC106345424	9.28	7.57	18.67	28.76	20.36	32.58	1.41	1.26	3.22	1.9633	27.2333	11.84	-1.201704497	0.150135077	0.495108372	-2.592292043	0.000848578	0.020776629	plant invertase/pectin methylesterase inhibitor domain-containing protein [Arabidopsis thaliana]	-	-	GO:0052689//carboxylic ester hydrolase activity	-
ncbi_106345427	LOC106345427	0.04	0.22	0	0.05	0.27	0	3.28	4.35	2.01	3.2133	0.1067	0.0867	-0.299560282	0.898298168	0.987600447	5.212449618	6.66E-10	1.21E-07	BnaC05g40470D [Brassica napus]	ko04626//Plant-pathogen interaction	GO:0043231//intracellular membrane-bounded organelle	-	-
ncbi_106345432	BNAA05G26540D	0.41	0.24	0.2	0.45	0.64	0.84	4.71	3.81	3.8	4.1067	0.6433	0.2833	-1.183066101	0.3639959	0.791948989	3.857395605	8.28E-21	1.69E-17	BnaA05g26540D [Brassica napus]	-	GO:0043231//intracellular membrane-bounded organelle	-	-
ncbi_106345442	LOC106345442	0.39	0.59	0.27	0.25	0.12	0.27	1.57	3.35	1.54	2.1533	0.2133	0.4167	0.965784285	0.003714179	0.033439415	2.36960607	1.77E-07	1.59E-05	BnaC06g11330D [Brassica napus]	-	-	-	GO:0046907//intracellular transport
ncbi_106345451	LOC106345451	1.51	1.87	2.62	2	2.7	1.68	0.27	0.09	0.43	0.2633	2.1267	2	-0.088593923	0.120850073	0.435370724	-2.925037942	0.000295529	0.008838081	BnaC06g14240D [Brassica napus]	-	GO:0043231//intracellular membrane-bounded organelle	-	-
ncbi_106345461	LOC106345461	49.37	48.62	46.06	24.42	14.04	14.02	34.65	36.53	39.53	36.9033	17.4933	48.0167	1.456730035	1.11E-15	1.24E-13	-0.37978412	0.249704538	0.843633779	DNA-binding protein S1FA1 [Brassica rapa]	-	GO:0043231//intracellular membrane-bounded organelle	-	-
ncbi_106345469	LOC106345469	0.95	1.25	0.8	2.29	2.27	3.43	0.1	0.04	0	0.0467	2.6633	1	-1.413233002	0.026038681	0.151155928	-4.421463768	0.000117587	0.004149125	BnaAnng00240D [Brassica napus]	-	GO:0043231//intracellular membrane-bounded organelle	-	-
ncbi_106345470	LOC106345470	0.17	0.15	0.04	1.13	1.24	0.79	0	0	0.05	0.0167	1.0533	0.12	-3.133855747	0.000357722	0.004782397	-2.847996907	0.264083035	0.859628966	trihelix transcription factor GT-3a-like [Brassica rapa]	-	GO:0043231//intracellular membrane-bounded organelle	-	-
ncbi_106345471	LOC106345471	0.03	0.09	0.16	0.91	0.73	1.07	0.06	0.12	0.12	0.1	0.9033	0.0933	-3.274794119	0.000168719	0.002534578	0.099535674	0.560919658	0.999767122	BnaAnng00200D [Brassica napus]	-	-	-	GO:0044699//single-organism process
ncbi_106345503	LOC106345503	4.46	4.04	3.3	12.88	10.61	13.72	2.1	0.53	1.34	1.3233	12.4033	3.9333	-1.656903531	1.51E-05	0.000312335	-1.571575947	0.07697431	0.492035499	BnaC05g41450D [Brassica napus]	ko01100//Metabolic pathways;ko00790//Folate biosynthesis	-	-	GO:0044257//cellular protein catabolic process
ncbi_106345512	LOC106345512	0.02	0.43	0.16	0	0.59	0	10.7	2.04	7.15	6.63	0.1967	0.2033	0.048094288	0.752686104	0.979721704	5.027090223	4.59E-09	6.71E-07	glycerol-3-phosphate acyltransferase 5 [Brassica rapa]	ko01100//Metabolic pathways;ko01110//Biosynthesis of secondary metabolites;ko00564//Glycerophospholipid metabolism;ko00561//Glycerolipid metabolism	-	-	GO:0046471//phosphatidylglycerol metabolic process
ncbi_106345514	LOC106345514	7.49	10.33	6.28	33.57	20.96	34.37	0.47	0.05	0.34	0.2867	29.6333	8.0333	-1.883150273	1.08E-05	0.000232758	-4.808552676	2.04E-11	5.38E-09	BnaC05g41900D [Brassica napus]	-	-	GO:0046914//transition metal ion binding	-
ncbi_106345535	LOC106345535	0.06	0.04	0	0.78	3.66	2.63	0	0	0	0	2.3567	0.0333	-6.14363831	3.13E-07	9.91E-06	-5.058893689	0.619571804	0.999767122	BnaA09g25090D [Brassica napus]	-	-	-	GO:0016485//protein processing
ncbi_106345547	LOC106345547	4.02	3.9	7.56	30.04	34.43	53.74	0.54	0.49	0.98	0.67	39.4033	5.16	-2.932874709	2.13E-10	1.19E-08	-2.945138065	3.93E-06	0.000236783	BnaCnng49680D [Brassica napus]	-	-	-	GO:0071555//cell wall organization
ncbi_106345548	LOC106345548	4.02	3.9	7.56	30.04	34.43	53.74	0.54	0.49	0.98	0.67	39.4033	5.16	-2.932874709	2.13E-10	1.19E-08	-2.945138065	3.93E-06	0.000236783	BnaCnng49680D [Brassica napus]	-	-	-	GO:0071555//cell wall organization
ncbi_106345570	LOC106345570	4.13	5.74	0.45	0.2	1.27	0.34	3.3	0.44	2.65	2.13	0.6033	3.44	2.511381368	0.001538369	0.016289488	-0.691555134	0.889216249	0.999767122	BnaA05g27930D [Brassica napus]	-	-	-	GO:0048229//gametophyte development
ncbi_106345571	LOC106345571	0.62	0.33	0.59	0.05	0.13	0.06	1.43	2.08	0.95	1.4867	0.08	0.5133	2.68182404	7.92E-05	0.001324904	1.534113359	0.000397438	0.011356122	BnaC05g42110D [Brassica napus]	-	-	-	GO:0046916//cellular transition metal ion homeostasis
ncbi_106345584	LOC106345584	0.29	0.52	2.31	1.78	3.15	3.85	0	0	0	0	2.9267	1.04	-1.492674911	0.2779637	0.698343993	-10.02236781	0.001769085	0.03672283	transmembrane emp24 domain-containing protein p24delta6-like [Brassica rapa]	-	-	-	GO:0051234//establishment of localization
ncbi_106345585	LOC106345585	0.2	0.14	0.04	1.23	1.59	2.15	0	0.18	0.05	0.0767	1.6567	0.1267	-3.709174528	5.44E-06	0.000127466	-0.724365557	0.937917183	0.999767122	BnaC05g42280D [Brassica napus]	-	-	-	GO:0009117//nucleotide metabolic process
ncbi_106345596	LOC106345596	0.49	0.34	0.49	0.57	1	0.33	2.43	2.92	0.63	1.9933	0.6333	0.44	-0.525461489	0.81726932	0.987600447	2.179607555	0.00012597	0.004406449	BnaC07g43250D [Brassica napus]	-	GO:0043231//intracellular membrane-bounded organelle	-	-
ncbi_106345615	LOC106345615	0.8	1.08	0.86	2.14	6.45	3.1	0.05	0.13	0.36	0.18	3.8967	0.9133	-2.093027132	0.002682154	0.025708569	-2.343144581	0.026331665	0.257967785	cytochrome P450 76C4-like [Brassica rapa]	-	-	GO:0046914//transition metal ion binding	-
ncbi_106345619	LOC106345619	37.55	51.32	80.07	118.42	118.44	127.69	3.76	6.45	6.15	5.4533	121.5167	56.3133	-1.109605745	0.091566034	0.363513647	-3.368266303	2.00E-09	3.21E-07	BnaC07g22700D [Brassica napus]	-	-	-	-
ncbi_106345634	LOC106345634	0.06	0.06	0	0.71	0.61	0.66	0	0	0	0	0.66	0.04	-4.044394119	0.005831469	0.047908357	-5.321928095	0.809500261	0.999767122	BnaA05g30780D [Brassica napus]	-	-	-	-
ncbi_106345649	LOC106345649	1.76	3.26	1.71	2.75	4.39	4.52	4.9	4.72	6.86	5.4933	3.8867	2.2433	-0.792889379	0.638771344	0.960992109	1.292037833	2.54E-06	0.000163029	BnaA05g32110D [Brassica napus]	-	-	-	-
ncbi_106345655	LOC106345655	24.91	26.01	21.59	87.95	47.98	71.16	10.98	8.79	12.69	10.82	69.03	24.17	-1.514006011	0.00061856	0.007635941	-1.159516974	0.009556646	0.129253603	BnaC06g08280D [Brassica napus]	ko01100//Metabolic pathways;ko01110//Biosynthesis of secondary metabolites;ko01200//Carbon metabolism;ko00010//Glycolysis / Gluconeogenesis;ko00620//Pyruvate metabolism;ko00020//Citrate cycle (TCA cycle)	-	GO:0016740//transferase activity	-
ncbi_106345662	LOC106345662	0.42	0.56	0.35	0.11	0.22	0.15	0.3	0.27	0.13	0.2333	0.16	0.4433	1.470319935	0.000107336	0.001729861	-0.925999419	0.676144836	0.999767122	transcription factor bHLH74-like isoform X1 [Brassica rapa]	-	-	GO:0005515//protein binding	-
ncbi_106345682	LOC106345682	0	0	0	0.07	1.45	0.23	0	0	0	0	0.5833	0	-9.188176706	0.001595955	0.016775002	0	1	1	BnaCnng06820D [Brassica napus]	-	-	-	-
ncbi_106345689	LOC106345689	9.07	5.43	7.76	1.8	1.58	2.67	5.45	4.02	10.85	6.7733	2.0167	7.42	1.879446545	1.94E-13	1.64E-11	-0.131553191	0.392685037	0.967927704	BnaCnng06510D [Brassica napus]	-	-	GO:0046983//protein dimerization activity	-
ncbi_106345698	LOC106345698	1.68	1.76	1.45	2.88	6.12	2.1	6.51	4.48	4.09	5.0267	3.7	1.63	-1.182653306	0.256626532	0.671916054	1.624730058	4.58E-11	1.11E-08	homeobox-leucine zipper protein ATHB-7-like [Brassica rapa]	-	-	-	GO:0048437//floral organ development
ncbi_106345701	LOC106345701	7.28	15.23	7.53	17.11	25.72	20.42	2.05	1.41	2.33	1.93	21.0833	10.0133	-1.074180667	0.187671891	0.563353762	-2.37524956	8.67E-05	0.003217875	BnaA05g34120D [Brassica napus]	-	-	GO:0046914//transition metal ion binding	-
ncbi_106345715	LOC106345715	0	0.04	0	0.11	1.16	0.33	0	0	0	0	0.5333	0.0133	-5.321928095	0.003490782	0.031766678	-3.736965594	0.982006263	0.999767122	F-box protein At3g28330-like [Brassica rapa]	-	-	-	-
ncbi_106345717	LOC106345717	7.93	7.89	8.22	22.99	18.56	17.75	1.85	1.91	1.57	1.7767	19.7667	8.0133	-1.302595209	0.000383305	0.005062115	-2.173229458	8.07E-06	0.000443599	BnaA01g25400D [Brassica napus]	-	-	-	GO:0042254//ribosome biogenesis
ncbi_106345745	LOC106345745	1.31	1.51	2.12	6.41	4.98	5.14	0.21	0.12	0.22	0.1833	5.51	1.6467	-1.742503778	9.16E-06	0.000201013	-3.167007518	4.50E-07	3.68E-05	protein NRT1/ PTR FAMILY 1.2 [Brassica rapa]	-	GO:0016020//membrane	-	-
ncbi_106345748	LOC106345748	2.58	3	4.81	11.08	5.86	6.76	1	0.63	1.17	0.9333	7.9	3.4633	-1.189691405	0.108085518	0.404670694	-1.891696922	0.001609231	0.034046793	BnaA06g01940D [Brassica napus]	-	-	-	GO:0045229//external encapsulating structure organization
ncbi_106345779	LOC106345779	5.48	10.43	5.82	20.59	26.82	25.77	0.68	0.81	0.67	0.72	24.3933	7.2433	-1.751761241	0.000175941	0.002630018	-3.330584957	1.83E-07	1.65E-05	BnaA06g00210D [Brassica napus]	ko01100//Metabolic pathways;ko00195//Photosynthesis	-	GO:0046906//tetrapyrrole binding	-
ncbi_106345799	LOC106345799	13.26	8.24	12.08	2.54	4.27	1.72	26.19	36.21	25.05	29.15	2.8433	11.1933	1.976984584	1.44E-10	8.30E-09	1.380856154	5.57E-08	6.02E-06	peptide methionine sulfoxide reductase B1, chloroplastic [Brassica rapa]	-	-	-	GO:0044710//single-organism metabolic process
ncbi_106345818	LOC106345818	0	0	0	0.39	0.22	0.41	0	0.13	0.04	0.0567	0.34	0	-8.409390936	0.000670308	0.008137631	5.824428435	0.328269417	0.922497331	myrosinase-associated protein [Brassica napus]	-	-	-	GO:0044238//primary metabolic process
ncbi_106345820	LOC106345820	446.92	336.1	551.03	43.88	25.65	15.72	387.96	415.91	730.08	511.3167	28.4167	444.6833	3.967969095	1.62E-27	5.65E-25	0.201438719	0.042086027	0.345556915	myrosinase-associated protein [Brassica napus]	-	-	-	GO:0044238//primary metabolic process
ncbi_106345831	LOC106345831	0.74	1.6	0.78	3.56	4.94	4.93	0.22	0.53	0.19	0.3133	4.4767	1.04	-2.105841371	0.000185198	0.002739479	-1.730813367	0.15710255	0.699634802	BnaA06g01280D [Brassica napus]	-	GO:0044798//nuclear transcription factor complex	-	-
ncbi_106345837	LOC106345837	2.61	3.28	2.45	1.45	0.89	0.48	2.03	1.11	3.02	2.0533	0.94	2.78	1.564352221	5.28E-07	1.59E-05	-0.437117033	0.752832849	0.999767122	protein trichome birefringence-like 28 [Brassica rapa]	-	-	-	GO:0009409//response to cold
ncbi_106345845	LOC106345845	0.77	1.06	0.33	0.12	0.19	0.33	1.86	4.54	1.94	2.78	0.2133	0.72	1.754887502	0.001695922	0.017638132	1.949016071	0.000200949	0.006501418	BnaC02g25060D [Brassica napus]	-	-	GO:0046914//transition metal ion binding	-
ncbi_106345859	LOC106345859	20.77	24.46	20.34	8.8	14.91	5.86	19.81	32.66	18.08	23.5167	9.8567	21.8567	1.148901651	7.21E-07	2.11E-05	0.105610188	0.054313157	0.403074606	BnaC05g31550D [Brassica napus]	-	GO:0031976//plastid thylakoid	-	-
ncbi_106345871	LOC106345871	3.25	2.06	2.36	17.51	7.49	8.53	1.17	0.31	1.07	0.85	11.1767	2.5567	-2.128154	0.000636555	0.007818334	-1.588729331	0.095601707	0.55312465	BnaC03g16100D [Brassica napus]	-	-	-	GO:0042254//ribosome biogenesis
ncbi_106345882	LOC106345882	24.31	6.41	0.26	1.88	0.6	0.27	10.59	1.47	1.78	4.6133	0.9167	10.3267	3.49383362	0.00079142	0.009315186	-1.162493201	0.625796633	0.999767122	23.5 kDa heat shock protein, mitochondrial-like [Brassica rapa]	ko04141//Protein processing in endoplasmic reticulum	-	-	GO:0044267//cellular protein metabolic process
ncbi_106345885	LOC106345885	47.77	23.7	42.03	7.91	5.76	0.56	26.85	14.95	25.87	22.5567	4.7433	37.8333	2.995684731	2.08E-06	5.44E-05	-0.746104004	0.661716063	0.999767122	probable pectinesterase/pectinesterase inhibitor 59 [Brassica rapa]	ko01100//Metabolic pathways;ko00040//Pentose and glucuronate interconversions	-	-	GO:0071555//cell wall organization
ncbi_106345900	LOC106345900	0.37	4.27	0.04	0.72	0.28	0.42	48.25	2.77	21.24	24.0867	0.4733	1.56	1.7206176	0.071179429	0.307926036	3.94861682	0.001176302	0.026817183	BnaA03g12940D [Brassica napus]	ko01100//Metabolic pathways;ko00260//Glycine, serine and threonine metabolism	-	-	GO:0044281//small molecule metabolic process
ncbi_106345905	LOC106345905	0.77	0.67	0.51	1.35	0.92	0.59	1.15	2.36	1.07	1.5267	0.9533	0.65	-0.552541023	0.843032682	0.987600447	1.231873474	0.002347428	0.045525236	BnaA01g01910D [Brassica napus]	-	GO:0043231//intracellular membrane-bounded organelle	-	-
ncbi_106345908	LOC106345908	0	0	0	0.04	1.69	0.16	0	0	0	0	0.63	0	-9.299208018	0.003833207	0.034275021	0	1	1	BnaA03g12850D [Brassica napus]	-	-	-	-
ncbi_106345909	LOC106345909	9.3	5.14	4.4	26.51	6.68	14.82	1.26	0.1	0.86	0.74	16.0033	6.28	-1.349535971	0.184839579	0.558217385	-3.085167383	0.001788801	0.037056535	BAG family molecular chaperone regulator 1-like [Brassica rapa]	-	GO:0043231//intracellular membrane-bounded organelle	-	-
ncbi_106345910	LOC106345910	4.12	4.12	4.13	11.68	12.7	12.09	2.89	2.53	2.44	2.62	12.1567	4.1233	-1.559864699	1.63E-14	1.58E-12	-0.654244283	0.782416151	0.999767122	probable ubiquitin-conjugating enzyme E2 26 [Brassica rapa]	ko04120//Ubiquitin mediated proteolysis	-	GO:0016879//ligase activity, forming carbon-nitrogen bonds	-
ncbi_106345912	LOC106345912	12.19	13.78	8.08	53.69	36.59	82.32	3.8	1.35	1.38	2.1767	57.5333	11.35	-2.341705761	2.22E-06	5.78E-05	-2.382499901	0.000576398	0.015216606	BnaA06g01180D [Brassica napus]	-	GO:0044444//cytoplasmic part	-	-
ncbi_106345914	LOC106345914	18.84	21.42	28.25	166.51	91.27	259.61	8.13	7.05	11.14	8.7733	172.4633	22.8367	-2.91686568	1.24E-08	5.22E-07	-1.380155096	0.011271343	0.145693737	lectin-like protein At1g53070 [Brassica rapa]	-	GO:0044444//cytoplasmic part	-	-
ncbi_106345934	LOC106345934	0.09	0.13	0	0.65	1.04	1.64	0	0	0.05	0.0167	1.11	0.0733	-3.919946748	0.000340016	0.004582128	-2.137503524	0.522198555	0.999767122	BnaA06g00910D [Brassica napus]	-	-	GO:0046914//transition metal ion binding	-
ncbi_106345948	LOC106345948	0.43	0.3	0.14	0.21	0.15	0.02	2.09	4.34	0.73	2.3867	0.1267	0.29	1.195015982	0.046035164	0.228431292	3.040872281	1.43E-05	0.000706007	BnaA07g05580D [Brassica napus]	-	GO:0043231//intracellular membrane-bounded organelle	-	-
ncbi_106345973	LOC106345973	0.72	0.28	0.28	0.55	0.53	0.55	2.48	1.47	3.16	2.37	0.5433	0.4267	-0.348728154	0.61878689	0.954046386	2.47370575	6.90E-07	5.36E-05	BnaA05g32890D [Brassica napus]	-	-	-	GO:0032412//regulation of ion transmembrane transporter activity
ncbi_106345992	LOC106345992	6.29	5.41	6.83	72	27.65	56.1	0.69	0.83	0.6	0.7067	51.9167	6.1767	-3.071297377	1.48E-10	8.51E-09	-3.127726711	2.29E-08	2.72E-06	probable histone H2A.2 [Brassica rapa]	-	-	-	GO:0051707//response to other organism
ncbi_106346066	LOC106346066	9.32	6.76	11.68	15.6	5.76	10.75	1.71	1.5	2.23	1.8133	10.7033	9.2533	-0.210015097	0.338704094	0.770448133	-2.351329011	3.60E-05	0.001542465	BnaA06g02370D [Brassica napus]	-	GO:0009534//chloroplast thylakoid	-	-
ncbi_106346075	LOC106346075	0.18	0.09	0.14	0.72	0.89	0.87	0.15	0	0.06	0.07	0.8267	0.1367	-2.596644306	0.005123626	0.043221251	-0.965234582	0.793571107	0.999767122	BnaA06g02530D [Brassica napus]	-	GO:0009532//plastid stroma	-	-
ncbi_106346105	LOC106346105	4.46	2.92	3.7	8.64	1.59	4.31	0.66	0.3	0.67	0.5433	4.8467	3.6933	-0.392069388	0.686919027	0.960992109	-2.765014012	2.49E-06	0.000160184	BnaA05g30600D [Brassica napus]	-	GO:0043231//intracellular membrane-bounded organelle	-	-
ncbi_106346160	LOC106346160	68.55	21.22	68.37	22.12	4.77	16.09	94.42	86.87	105.67	95.6533	14.3267	52.7133	1.879464942	7.24E-05	0.001226088	0.859647321	0.005358042	0.085186804	branched-chain-amino-acid aminotransferase 6 [Brassica rapa]	ko01100//Metabolic pathways;ko01110//Biosynthesis of secondary metabolites;ko01230//Biosynthesis of amino acids;ko00270//Cysteine and methionine metabolism;ko01210//2-Oxocarboxylic acid metabolism;ko00280//Valine, leucine and isoleucine degradation;ko00770//Pantothenate and CoA biosynthesis;ko00966//Glucosinolate biosynthesis;ko00290//Valine, leucine and isoleucine biosynthesis	GO:0044424//intracellular part	-	-
ncbi_106346178	LOC106346178	5.42	6.29	4.27	10.21	10.08	7.27	2.13	1.52	1.52	1.7233	9.1867	5.3267	-0.78630848	0.494966211	0.894439303	-1.628031223	0.000939558	0.022576569	BnaA01g31670D [Brassica napus]	-	-	-	GO:0048229//gametophyte development
ncbi_106346192	LOC106346192	0.93	0.78	1.03	2.82	2.62	2.9	0.51	0.35	0.48	0.4467	2.78	0.9133	-1.60587149	1.57E-06	4.23E-05	-1.031942893	0.221418869	0.804956436	paired amphipathic helix protein Sin3-like 6 isoform X1 [Brassica rapa]	-	GO:0043231//intracellular membrane-bounded organelle	-	-
ncbi_106346193	LOC106346193	0.93	0.78	1.03	2.82	2.62	2.9	0.51	0.35	0.48	0.4467	2.78	0.9133	-1.60587149	1.57E-06	4.23E-05	-1.031942893	0.221418869	0.804956436	paired amphipathic helix protein Sin3-like 6 isoform X1 [Brassica rapa]	-	GO:0043231//intracellular membrane-bounded organelle	-	-
ncbi_106346204	LOC106346204	359.62	458.01	565.6	1414.91	1290.19	1756.59	61.78	69.22	186.09	105.6967	1487.23	461.0767	-1.689549214	1.67E-05	0.000341561	-2.125076779	0.003425087	0.060850914	glutathione S-transferase U17 [Brassica rapa]	ko00480//Glutathione metabolism	-	-	GO:0048585//negative regulation of response to stimulus
ncbi_106346221	LOC106346221	18.81	23.76	12.58	39.62	50.02	55.15	29.21	37.27	24.47	30.3167	48.2633	18.3833	-1.392529174	0.003307046	0.030458	0.721712752	0.000260284	0.007974405	branched-chain-amino-acid aminotransferase 1, mitochondrial isoform X2 [Brassica rapa]	ko01100//Metabolic pathways;ko01110//Biosynthesis of secondary metabolites;ko01230//Biosynthesis of amino acids;ko00270//Cysteine and methionine metabolism;ko01210//2-Oxocarboxylic acid metabolism;ko00280//Valine, leucine and isoleucine degradation;ko00770//Pantothenate and CoA biosynthesis;ko00966//Glucosinolate biosynthesis;ko00290//Valine, leucine and isoleucine biosynthesis	GO:0043231//intracellular membrane-bounded organelle	-	-
ncbi_106346227	LOC106346227	1.29	1.75	1.87	4.94	4.87	7.45	1.79	0.43	0.92	1.0467	5.7533	1.6367	-1.813637535	9.35E-06	0.000204602	-0.644958465	0.883753489	0.999767122	receptor-like protein kinase HAIKU2 [Brassica rapa]	-	-	-	GO:0048437//floral organ development
ncbi_106346269	LOC106346269	0.79	0.81	0.66	0.1	0.07	0.07	0.52	0.31	0.62	0.4833	0.08	0.7533	3.235216462	7.83E-13	6.12E-11	-0.640269872	0.900644275	0.999767122	transcription factor PIF3 isoform X2 [Brassica rapa]	ko04075//Plant hormone signal transduction;ko04712//Circadian rhythm - plant	-	-	GO:0048511//rhythmic process
ncbi_106346272	LOC106346272	7.49	19.27	13.09	1.11	3.44	0.77	1.31	0.36	4.42	2.03	1.7733	13.2833	2.905081573	6.77E-09	2.99E-07	-2.710065591	0.012190356	0.153435013	BnaC05g07050D [Brassica napus]	-	-	GO:0048037//cofactor binding	-
ncbi_106346276	LOC106346276	0.03	0.25	0.18	1.52	1.19	2.05	0	0	0	0	1.5867	0.1533	-3.371255807	5.90E-05	0.001027892	-7.26052755	0.133539319	0.649542522	myosin heavy chain, clone 203 [Brassica rapa]	-	-	-	GO:1902410//mitotic cytokinetic process
ncbi_106346279	LOC106346279	4.53	4.4	4.44	11.21	11.06	10.52	1.99	1.86	2.67	2.1733	10.93	4.4567	-1.294256436	1.04E-06	2.93E-05	-1.036055596	0.116695648	0.61255782	chloroplast stem-loop binding protein of 41 kDa b, chloroplastic [Brassica rapa]	-	-	-	GO:0048869//cellular developmental process
ncbi_106346289	LOC106346289	32.35	35.54	44.97	106.55	70.29	109.98	13.24	10.08	17.06	13.46	95.6067	37.62	-1.345611372	0.003280301	0.030297064	-1.482821439	0.002034368	0.040986322	calreticulin-2-like [Brassica rapa]	ko04141//Protein processing in endoplasmic reticulum;ko04145//Phagosome	-	GO:0046872//metal ion binding	-
ncbi_106346295	LOC106346295	2.24	2.9	3.14	9.81	12.51	11.89	1.22	0.98	1.55	1.25	11.4033	2.76	-2.046715431	1.05E-13	9.18E-12	-1.142740172	0.083186148	0.512845846	mitogen-activated protein kinase kinase kinase ANP1 [Brassica rapa]	ko04016//MAPK signaling pathway - plant	-	-	GO:0090567//reproductive shoot system development
ncbi_106346303	LOC106346303	23.61	20.83	29.62	67.04	62.32	74.29	14.92	12.41	15.12	14.15	67.8833	24.6867	-1.45932536	6.96E-06	0.000158017	-0.802929996	0.394380594	0.968688675	probable histone H2AXa [Brassica rapa]	-	-	GO:0046983//protein dimerization activity	-
ncbi_106346316	LOC106346316	57.99	52.94	65.8	26.46	27.55	19.1	33.93	38.72	45.34	39.33	24.37	58.91	1.273406302	1.46E-22	3.32E-20	-0.582882367	0.958078485	0.999767122	probable low-specificity L-threonine aldolase 1 [Brassica rapa]	ko01100//Metabolic pathways;ko01110//Biosynthesis of secondary metabolites;ko01230//Biosynthesis of amino acids;ko00260//Glycine, serine and threonine metabolism	-	GO:0043168//anion binding	-
ncbi_106346324	LOC106346324	1.36	5.17	1.58	56.19	46.67	66.15	0.08	0	0.05	0.0433	56.3367	2.7033	-4.381262886	7.37E-14	6.59E-12	-5.963118386	6.86E-06	0.000383207	BnaA06g04950D [Brassica napus]	ko04130//SNARE interactions in vesicular transport	-	-	GO:1902410//mitotic cytokinetic process
ncbi_106346325	LOC106346325	7.36	7.48	7.1	18.03	17.15	16.03	3.59	2.74	3.7	3.3433	17.07	7.3133	-1.222862033	3.19E-09	1.50E-07	-1.12924192	0.006724579	0.10040509	magnesium-chelatase subunit ChlD, chloroplastic [Brassica rapa]	ko01100//Metabolic pathways;ko01110//Biosynthesis of secondary metabolites;ko00860//Porphyrin metabolism	-	GO:0051003//ligase activity, forming nitrogen-metal bonds, forming coordination complexes	-
ncbi_106346327	LOC106346327	1.49	0.84	1.18	4.73	2.36	5	0.85	0.73	0.48	0.6867	4.03	1.17	-1.784271309	0.006142648	0.049986435	-0.768826693	0.715428273	0.999767122	BnaA06g04930D [Brassica napus]	-	-	-	GO:0042254//ribosome biogenesis
ncbi_106346352	LOC106346352	64.69	78.93	87.19	161.18	261.63	199.89	37.35	34.93	54.45	42.2433	207.5667	76.9367	-1.431831548	0.000608272	0.007529724	-0.864947646	0.328768232	0.923183017	BnaA06g04670D [Brassica napus]	ko01100//Metabolic pathways;ko00520//Amino sugar and nucleotide sugar metabolism	-	GO:0048037//cofactor binding	-
ncbi_106346354	LOC106346354	2.56	2.47	3.17	0.1	1.54	0.07	11.56	23.38	11.96	15.6333	0.57	2.7333	2.261627585	0.007198	0.056906656	2.515892108	5.88E-12	1.80E-09	histone H2B.2 [Brassica rapa]	-	-	GO:0046983//protein dimerization activity	-
ncbi_106346356	LOC106346356	1.69	1.15	2.38	7.86	4.44	7.69	0.94	0.92	1.05	0.97	6.6633	1.74	-1.93715676	0.000445199	0.005753262	-0.843030654	0.556596166	0.999767122	DNA ligase 1 [Brassica rapa]	ko03420//Nucleotide excision repair;ko03030//DNA replication;ko03430//Mismatch repair;ko03410//Base excision repair	-	GO:0032550//purine ribonucleoside binding	-
ncbi_106346358	LOC106346358	0.26	0.15	0.04	0.96	0.76	0.74	0	0	0	0	0.82	0.15	-2.450661409	0.004919979	0.041890066	-7.22881869	0.039212649	0.331305569	BnaA01g25860D [Brassica napus]	-	-	-	-
ncbi_106346369	LOC106346369	5.46	3.29	5.66	13.28	7.42	11.47	0.52	0.37	1.03	0.64	10.7233	4.8033	-1.1586456	0.123161333	0.440633739	-2.907892119	1.60E-05	0.000777563	GATA transcription factor 11-like [Brassica rapa]	-	-	GO:0046914//transition metal ion binding	-
ncbi_106346391	LOC106346391	2.48	1.14	2.28	0	0.07	0	7.82	22.73	7.81	12.7867	0.0233	1.9667	6.397216222	3.56E-07	1.11E-05	2.700815861	7.56E-07	5.76E-05	BnaA06g04170D [Brassica napus]	-	-	-	GO:0006950//response to stress
ncbi_106346397	LOC106346397	219.16	252.46	389.57	574.12	391.76	547.33	33.96	54.6	101.59	63.3833	504.4033	287.0633	-0.813208743	0.520865715	0.913389673	-2.179193628	0.002044208	0.041123516	cell wall / vacuolar inhibitor of fructosidase 1 [Brassica rapa]	-	-	GO:0052689//carboxylic ester hydrolase activity	-
ncbi_106346401	LOC106346401	0.3	1.54	0.57	5.85	3.62	4.48	0	0.03	0	0.01	4.65	0.8033	-2.53316007	0.001223623	0.01348174	-6.327926836	0.000311756	0.009255389	polygalacturonase At1g48100 [Brassica rapa]	-	-	-	GO:0044238//primary metabolic process
ncbi_106346409	LOC106346409	6.02	4.93	3.19	1.95	1.24	1.05	2.85	3.26	1.78	2.63	1.4133	4.7133	1.73764595	9.24E-09	3.98E-07	-0.841684915	0.611791583	0.999767122	BnaC01g33080D [Brassica napus]	-	GO:0043231//intracellular membrane-bounded organelle	-	-
ncbi_106346413	LOC106346413	2.32	4.07	5.38	5.24	7.67	2.44	0.17	0.29	0.43	0.2967	5.1167	3.9233	-0.383124335	0.637754746	0.960992109	-3.725165174	3.19E-07	2.72E-05	CBL-interacting serine/threonine-protein kinase 17-like [Brassica rapa]	-	-	GO:0032550//purine ribonucleoside binding	-
ncbi_106346414	LOC106346414	50.84	75.77	62.87	435.72	478.83	458.69	8.8	12.33	26.82	15.9833	457.7467	63.16	-2.857466304	1.92E-35	1.35E-32	-1.982442857	0.005470426	0.08643358	BnaA06g03920D [Brassica napus]	-	-	-	GO:0046942//carboxylic acid transport
ncbi_106346417	LOC106346417	4.95	6.89	6.2	2.33	1.72	1.25	5.28	6.97	8.48	6.91	1.7667	6.0133	1.767135074	8.54E-18	1.21E-15	0.200520778	0.011602647	0.148701598	BnaC06g01890D [Brassica napus]	-	GO:0009536//plastid	-	-
ncbi_106346432	BNAA06G07400D	2.28	2.11	3.41	10.23	9.65	11.54	0.99	1.12	0.96	1.0233	10.4733	2.6	-2.010137152	2.22E-07	7.30E-06	-1.345235468	0.108905898	0.592704864	BnaC05g08790D [Brassica napus]	-	-	-	-
ncbi_106346433	BNAA06G07410D	11.85	11.38	15.89	28.72	38.92	48.99	15.9	14.44	12.7	14.3467	38.8767	13.04	-1.575960656	0.000326389	0.00442868	0.137771708	0.005693023	0.088745336	BnaC05g08810D [Brassica napus]	-	GO:0043231//intracellular membrane-bounded organelle	-	-
ncbi_106346445	LOC106346445	5	5.89	5.3	12.56	10.04	10.62	2.05	1.52	2.21	1.9267	11.0733	5.3967	-1.036949088	0.00425601	0.037271226	-1.485961588	0.000110802	0.003962701	oxysterol-binding protein-related protein 1D [Brassica rapa]	-	-	GO:0032934//sterol binding	-
ncbi_106346449	LOC106346449	4.3	4.63	4.2	18.93	14.97	26.86	0.92	0.6	0.34	0.62	20.2533	4.3767	-2.210254954	1.20E-09	6.05E-08	-2.81949239	2.45E-07	2.16E-05	BnaA06g07630D [Brassica napus]	-	-	GO:0046914//transition metal ion binding	-
ncbi_106346458	LOC106346458	29.53	22.72	33.92	73.36	39.22	63.06	11.14	6.59	11.56	9.7633	58.5467	28.7233	-1.027363851	0.174542651	0.540199907	-1.556777491	0.002428768	0.046735426	BnaC05g09210D [Brassica napus]	ko01100//Metabolic pathways;ko01200//Carbon metabolism;ko00710//Carbon fixation in photosynthetic organisms	-	-	GO:0042254//ribosome biogenesis
ncbi_106346473	LOC106346473	0.74	0.3	0.56	3.1	2.15	4.36	0.08	0	0.21	0.0967	3.2033	0.5333	-2.586464526	3.91E-05	0.000715936	-2.4639471	0.079001465	0.498868275	BnaA06g09160D [Brassica napus]	ko04626//Plant-pathogen interaction	GO:0043231//intracellular membrane-bounded organelle	-	-
ncbi_106346482	LOC106346482	0.9	1.68	1.34	5.39	5.7	5.41	1.21	0.91	0.72	0.9467	5.5	1.3067	-2.073540465	8.51E-08	3.04E-06	-0.464962725	0.758715782	0.999767122	BnaA06g09070D [Brassica napus]	ko01100//Metabolic pathways;ko00600//Sphingolipid metabolism	-	GO:0046914//transition metal ion binding	-
ncbi_106346484	LOC106346484	0.16	0.09	0.03	1.04	0.54	2.29	0.03	0	0	0.01	1.29	0.0933	-3.788834834	0.00041554	0.005424429	-3.222392421	0.27350106	0.869463046	BnaA06g09060D [Brassica napus]	-	-	-	GO:0048827//phyllome development
ncbi_106346487	LOC106346487	0.09	0.08	0	0	0.2	0.04	0.57	0.91	0.39	0.6233	0.08	0.0567	-0.497499659	0.968224615	0.992835315	3.459431619	4.77E-05	0.001967026	BnaA06g09030D [Brassica napus]	ko00230//Purine metabolism;ko00240//Pyrimidine metabolism	-	-	GO:0044260//cellular macromolecule metabolic process
ncbi_106346493	LOC106346493	4.72	4.35	2.9	5.69	3.34	4.27	0.41	0.5	1.26	0.7233	4.4333	3.99	-0.152003093	0.155136809	0.505296123	-2.463656204	0.001604886	0.033981361	BnaA06g08980D [Brassica napus]	ko01100//Metabolic pathways;ko00195//Photosynthesis	-	GO:0046872//metal ion binding	-
ncbi_106346512	LOC106346512	4.05	12.73	0.39	0.05	0.38	0.03	0.61	0.63	0.99	0.7433	0.1533	5.7233	5.222112368	3.73E-06	9.15E-05	-2.944774424	0.027742927	0.266009359	BnaC01g17710D [Brassica napus]	-	-	-	GO:0071555//cell wall organization
ncbi_106346514	LOC106346514	11.21	13.73	11.62	55.72	38.78	42.9	5.13	8.66	6.51	6.7667	45.8	12.1867	-1.910044029	1.17E-11	7.88E-10	-0.848786343	0.489296262	0.999767122	BnaC01g02940D [Brassica napus]	ko04144//Endocytosis	GO:0043231//intracellular membrane-bounded organelle	-	-
ncbi_106346516	LOC106346516	0.23	0.27	0.34	0.29	1.21	0.81	1.8	3.28	1.39	2.1567	0.77	0.28	-1.459431619	0.255717849	0.670497596	2.945304479	3.98E-09	5.95E-07	BnaC01g17770D [Brassica napus]	-	-	GO:0032934//sterol binding	-
ncbi_106346533	LOC106346533	2.13	1.26	4.92	0.76	0.6	1.42	2.75	0.48	0.54	1.2567	0.9267	2.77	1.579763594	0.000765062	0.009058906	-1.140283954	0.497778622	0.999767122	BnaCnng23860D [Brassica napus]	ko01100//Metabolic pathways;ko01110//Biosynthesis of secondary metabolites;ko00960//Tropane, piperidine and pyridine alkaloid biosynthesis	-	-	GO:0044093//positive regulation of molecular function
ncbi_106346545	LOC106346545	0.28	1.08	0.38	2.66	7.54	4.2	0.18	0.12	0.1	0.1333	4.8	0.58	-3.0489096	0.000361379	0.004821841	-2.121015401	0.196469901	0.766675701	BnaA06g08850D [Brassica napus]	-	-	-	-
ncbi_106346563	LOC106346563	5.44	22.34	24.01	43.83	55.89	43.45	0.96	2.37	2.38	1.9033	47.7233	17.2633	-1.466983757	0.091219224	0.362695966	-3.181110908	0.000259451	0.007951861	superoxide dismutase [Fe] 1, chloroplastic [Brassica rapa]	ko04146//Peroxisome	-	-	GO:0048511//rhythmic process
ncbi_106346567	LOC106346567	145.12	225.52	260.19	7.26	21.25	4.33	247.43	634.85	388.84	423.7067	10.9467	210.2767	4.263725239	1.52E-17	2.09E-15	1.010777058	0.000894313	0.021694215	RecName: Full=Oleosin Bn-III; Short=BnIII [Brassica napus]	-	-	-	GO:0048507//meristem development
ncbi_106346570	LOC106346570	0.76	1.07	1.47	2.8	3.86	5.54	0.52	0.28	0.51	0.4367	4.0667	1.1	-1.886343218	0.00200612	0.020223262	-1.332899213	0.167988788	0.721066893	GATA transcription factor 5-like [Brassica rapa]	-	-	GO:0046914//transition metal ion binding	-
ncbi_106346572	LOC106346572	5.33	1.78	0.2	0.22	0.26	0.17	1.24	20.2	0.34	7.26	0.2167	2.4367	3.491359783	0.000204441	0.002983614	1.575060643	0.131063722	0.644631188	BnaC01g17140D [Brassica napus]	ko04141//Protein processing in endoplasmic reticulum	-	-	GO:0044267//cellular protein metabolic process
ncbi_106346578	LOC106346578	2.43	2.95	2.58	6.21	6.07	5.89	0.74	0.85	1.24	0.9433	6.0567	2.6533	-1.190718084	0.001071875	0.012048813	-1.491966378	0.018547488	0.203997321	BnaC04g30020D [Brassica napus]	ko01100//Metabolic pathways;ko01110//Biosynthesis of secondary metabolites;ko01200//Carbon metabolism;ko00630//Glyoxylate and dicarboxylate metabolism	-	GO:0016791//phosphatase activity	-
ncbi_106346579	LOC106346579	0.95	1.54	1.33	3.36	4.04	3.42	0.55	0.48	0.91	0.6467	3.6067	1.2733	-1.502055956	6.37E-05	0.001099438	-0.977515986	0.356407456	0.943683186	BnaC04g29990D [Brassica napus]	-	-	-	GO:0008152//metabolic process
ncbi_106346584	LOC106346584	3.09	2.48	1.7	10.59	9.82	8.82	0.26	0	0.18	0.1467	9.7433	2.4233	-2.00742256	3.68E-07	1.15E-05	-4.046379935	3.56E-05	0.001527279	BnaA03g31730D [Brassica napus]	-	-	-	GO:0043207//response to external biotic stimulus
ncbi_106346585	LOC106346585	2.01	1.56	1.16	1.16	1.07	0.88	0.15	0.22	0.17	0.18	1.0367	1.5767	0.604925603	8.88E-05	0.001463483	-3.130808871	6.49E-07	5.09E-05	BnaA06g09220D [Brassica napus]	-	-	GO:0032550//purine ribonucleoside binding	-
ncbi_106346587	LOC106346587	3.55	5.53	4.45	5.41	3.08	3.41	0.68	0.1	0.6	0.46	3.9667	4.51	0.185200266	0.008909841	0.067144808	-3.293421667	1.71E-05	0.000822789	BnaA06g09270D [Brassica napus]	-	GO:0043231//intracellular membrane-bounded organelle	-	-
ncbi_106346595	LOC106346595	0	0.08	0	0.4	0.61	0.63	0	0	0	0	0.5467	0.0267	-4.357552005	0.002998518	0.028215818	-4.736965594	0.806782592	0.999767122	BnaA06g09360D [Brassica napus]	-	GO:0043231//intracellular membrane-bounded organelle	-	-
ncbi_106346620	LOC106346620	27.33	17.93	14.74	1	0.52	0	117.26	167.39	77.45	120.7	0.5067	20	5.302819272	3.11E-05	0.000584829	2.593353771	4.05E-12	1.34E-09	BnaA06g09700D [Brassica napus]	ko01100//Metabolic pathways;ko01110//Biosynthesis of secondary metabolites;ko00940//Phenylpropanoid biosynthesis;ko00500//Starch and sucrose metabolism;ko00460//Cyanoamino acid metabolism	-	-	GO:0044238//primary metabolic process
ncbi_106346621	LOC106346621	17.94	20.81	5.38	0.79	0.42	0.06	274	1076.39	100.52	483.6367	0.4233	14.71	5.118859345	1.05E-13	9.18E-12	5.039054474	8.42E-10	1.50E-07	BnaA06g09710D [Brassica napus]	-	-	-	GO:0071704//organic substance metabolic process
ncbi_106346624	LOC106346624	9.8	11.07	10.18	18.25	16.11	17.18	4.03	2.46	4.14	3.5433	17.18	10.35	-0.731099269	0.388993209	0.815861554	-1.546451672	0.000553752	0.014775295	BnaCnng21600D [Brassica napus]	-	GO:0044437//vacuolar part	-	-
ncbi_106346628	LOC106346628	11.83	10.69	12.28	6.37	4.57	4.18	14.87	11.64	12.69	13.0667	5.04	11.6	1.202629167	1.58E-17	2.17E-15	0.171766348	4.62E-05	0.001916817	BnaC03g48750D [Brassica napus]	-	-	GO:0031406//carboxylic acid binding	-
ncbi_106346644	LOC106346644	24.78	33.74	36.17	79.48	108.07	110.39	17.39	9.87	15.77	14.3433	99.3133	31.5633	-1.653737847	2.94E-06	7.44E-05	-1.137869234	0.060785824	0.431314024	BnaA06g10340D [Brassica napus]	ko00190//Oxidative phosphorylation	-	-	GO:0060918//auxin transport
ncbi_106346647	BNAA06G10310D	0.48	0.7	0.84	3.52	4.79	3.91	0.14	0.13	0.14	0.1367	4.0733	0.6733	-2.596817087	3.84E-12	2.79E-10	-2.300659478	0.002981364	0.054644255	BnaA06g10310D [Brassica napus]	-	GO:0000775//chromosome, centromeric region	-	-
ncbi_106346657	LOC106346657	7.57	9.58	6.79	20.79	19.31	25.93	9.48	2.43	5.47	5.7933	22.01	7.98	-1.463698494	3.10E-05	0.00058356	-0.46199507	0.838788295	0.999767122	BnaA06g10160D [Brassica napus]	-	-	-	GO:0034220//ion transmembrane transport
ncbi_106346666	LOC106346666	53.47	31.45	53.17	18.67	28.83	12.63	57.22	95.85	62.77	71.9467	20.0433	46.03	1.199451985	8.03E-07	2.33E-05	0.644353405	0.00241713	0.046544468	LOW QUALITY PROTEIN: SNF1-related protein kinase regulatory subunit gamma-like PV42a [Brassica rapa]	-	-	-	GO:0048868//pollen tube development
ncbi_106346667	LOC106346667	0.38	0.33	0.15	1.26	1.32	0.93	0.23	0.1	0.29	0.2067	1.17	0.2867	-2.029062466	0.003044519	0.028566443	-0.472068444	0.893994425	0.999767122	U-box domain-containing protein 25-like [Brassica rapa]	-	GO:0044424//intracellular part	-	-
ncbi_106346668	LOC106346668	4.28	1.5	3.61	1.01	1.49	1.01	3.2	0.63	3.45	2.4267	1.17	3.13	1.419654127	3.25E-05	0.00060823	-0.367186707	0.80711079	0.999767122	BnaA06g10000D [Brassica napus]	-	GO:0043231//intracellular membrane-bounded organelle	-	-
ncbi_106346672	LOC106346672	5.02	5.16	4.13	11.27	9.49	8.71	1.76	1.59	1.93	1.76	9.8233	4.77	-1.042223388	0.01176471	0.083432932	-1.438413837	7.67E-05	0.002912985	protein clueless isoform X2 [Brassica rapa]	-	GO:0044444//cytoplasmic part	-	-
ncbi_106346676	LOC106346676	3.03	1.77	1.75	0.92	0.92	0.94	8.23	9.28	11.38	9.63	0.9267	2.1833	1.236410024	9.61E-06	0.000209316	2.141003392	3.40E-12	1.13E-09	BnaA06g09930D [Brassica napus]	-	-	-	-
ncbi_106346685	LOC106346685	2.22	3.12	1.89	0.58	0.53	0.5	9.99	12.61	7.45	10.0167	0.5367	2.41	2.166934959	1.12E-17	1.56E-15	2.055297439	3.15E-12	1.06E-09	MATE efflux family protein 7-like [Brassica rapa]	-	-	-	GO:0044763//single-organism cellular process
ncbi_106346703	LOC106346703	1.73	1.17	1.01	0.14	0.33	0.02	2.9	3.42	2.26	2.86	0.1633	1.3033	2.996314953	5.29E-06	0.000124318	1.13380904	7.61E-06	0.000421453	leucine-rich repeat receptor-like serine/threonine-protein kinase At1g17230 isoform X1 [Brassica rapa]	-	-	GO:0032550//purine ribonucleoside binding	-
ncbi_106346704	LOC106346704	3.24	3.12	3.09	8.5	7.08	7.28	2.2	2.17	1.76	2.0433	7.62	3.15	-1.274439169	1.62E-06	4.36E-05	-0.624427255	0.896146522	0.999767122	translation initiation factor IF-2, chloroplastic-like [Brassica rapa]	-	-	GO:0032550//purine ribonucleoside binding	-
ncbi_106346706	LOC106346706	2.76	3.19	3.71	7.87	5.78	4.35	1.06	0.74	1	0.9333	6	3.22	-0.897901812	0.40585752	0.829449711	-1.786596362	0.002247631	0.044168327	CASP-like protein At1g17200 isoform X2 [Brassica rapa]	-	-	-	GO:0048646//anatomical structure formation involved in morphogenesis
ncbi_106346722	LOC106346722	58.23	50.11	55.99	94.95	70.17	87.72	21.09	18.49	26.14	21.9067	84.28	54.7767	-0.621628838	0.974845683	0.994267483	-1.322191497	0.001029054	0.024149861	ocs element-binding factor 1-like [Brassica rapa]	-	-	GO:0046983//protein dimerization activity	-
ncbi_106346730	LOC106346730	0.55	0.76	0.62	2.72	2.54	1.85	0.78	0.25	0.42	0.4833	2.37	0.6433	-1.881248712	0.000157641	0.002393087	-0.412547947	0.802760885	0.999767122	BnaAnng23090D [Brassica napus]	ko01110//Biosynthesis of secondary metabolites;ko00900//Terpenoid backbone biosynthesis	-	GO:0016740//transferase activity	-
ncbi_106346732	LOC106346732	6.8	5.08	9.59	11.79	5.92	9.01	2.36	1.71	2.38	2.15	8.9067	7.1567	-0.315597817	0.383163071	0.812987395	-1.734951126	0.001899782	0.038889647	BnaC05g13140D [Brassica napus]	-	-	-	-
ncbi_106346740	LOC106346740	0.56	0.81	0.64	5.23	9.13	10.01	0.33	0.26	0.18	0.2567	8.1233	0.67	-3.599838845	1.59E-14	1.55E-12	-1.38426515	0.236006615	0.823353976	BnaC05g12890D [Brassica napus]	-	-	-	GO:0034285//response to disaccharide
ncbi_106346742	LOC106346742	1.79	1.85	2.15	5.86	4.29	6.17	1.69	1.25	0.98	1.3067	5.44	1.93	-1.495005804	0.000309816	0.00423424	-0.562709694	0.937490543	0.999767122	BnaC05g12880D [Brassica napus]	-	GO:0043231//intracellular membrane-bounded organelle	-	-
ncbi_106346745	BNAA06G11320D	6.26	4.97	6.95	3.66	5.19	3.08	37.98	61.56	26.45	41.9967	3.9767	6.06	0.607758156	2.87E-05	0.000546778	2.792885125	4.82E-14	2.47E-11	BnaC05g12860D [Brassica napus]	-	GO:0043231//intracellular membrane-bounded organelle	-	-
ncbi_106346756	LOC106346756	0.36	1.11	0.17	9.63	6.89	9.52	0	0	0.02	0.0067	8.68	0.5467	-3.988961729	2.76E-08	1.08E-06	-6.357552005	0.000295482	0.008838081	BnaA06g11160D [Brassica napus]	-	-	-	GO:0044763//single-organism cellular process
ncbi_106346761	LOC106346761	2.07	2.2	2.13	4.42	5.48	5.4	1.11	1.47	1.32	1.3	5.1	2.1333	-1.257387843	0.000106804	0.001723902	-0.714597781	0.683668676	0.999767122	BnaA06g38330D [Brassica napus]	ko00790//Folate biosynthesis	-	GO:0046914//transition metal ion binding	-
ncbi_106346762	LOC106346762	3.92	6.71	4.83	22.15	17.56	25.61	1.74	1.46	2.01	1.7367	21.7733	5.1533	-2.078984472	2.24E-08	8.90E-07	-1.569185042	0.005190149	0.083193247	BnaC05g12600D [Brassica napus]	-	GO:0016020//membrane	-	-
ncbi_106346772	LOC106346772	5.22	6.28	3.31	31.07	27.34	21.44	1.63	0.77	1.31	1.2367	26.6167	4.9367	-2.430720767	1.94E-10	1.10E-08	-1.997080549	0.001369143	0.030264608	actin 2 [Arabidopsis thaliana]	-	-	-	GO:0070838//divalent metal ion transport
ncbi_106346779	LOC106346779	0.3	0.24	0.22	1.11	1.26	2.11	0.17	0	0.05	0.0733	1.4933	0.2533	-2.559427409	4.19E-05	0.000759489	-1.788495895	0.2891287	0.885895373	BnaA06g10930D [Brassica napus]	-	GO:0043231//intracellular membrane-bounded organelle	-	-
ncbi_106346806	LOC106346806	15.75	18.73	13.16	7.83	2.21	2.6	11.14	7.57	5.98	8.23	4.2133	15.88	1.91417695	3.04E-07	9.68E-06	-0.948246577	0.26913082	0.864449934	BnaC05g12080D [Brassica napus]	-	-	-	-
ncbi_106346829	LOC106346829	19.96	12.21	28.15	14.78	61.4	10.92	3.77	6.26	2.91	4.3133	29.0333	20.1067	-0.53003629	0.881275981	0.987600447	-2.220798811	0.002103735	0.042020001	senescence-associated protein DIN1 isoform X2 [Brassica rapa]	-	-	-	GO:0044767//single-organism developmental process
ncbi_106346834	LOC106346834	0.52	1.41	1.05	4.23	3.29	4.98	0.09	0.19	0.13	0.1367	4.1667	0.9933	-2.068543859	0.000311327	0.004254203	-2.861616516	0.000522386	0.014123498	homeobox-leucine zipper protein HDG12 [Brassica rapa]	-	GO:0043231//intracellular membrane-bounded organelle	-	-
ncbi_106346836	LOC106346836	1.22	2.25	2.61	8.87	5.81	10.04	0.99	0.61	1.43	1.01	8.24	2.0267	-2.023535514	0.000102504	0.001663014	-1.00475353	0.575787278	0.999767122	BnaC05g13850D [Brassica napus]	ko01100//Metabolic pathways;ko00520//Amino sugar and nucleotide sugar metabolism;ko00051//Fructose and mannose metabolism	-	GO:0048037//cofactor binding	-
ncbi_106346842	LOC106346842	2.79	2.79	1.52	0.41	0.48	0.56	4.39	3.93	3.11	3.81	0.4833	2.3667	2.291766124	6.37E-12	4.47E-10	0.686934474	0.001061184	0.024761161	BnaC05g13790D [Brassica napus]	-	GO:0043231//intracellular membrane-bounded organelle	-	-
ncbi_106346843	LOC106346843	133.68	153.11	88.25	24.54	42.83	2.96	141.27	168.54	76.13	128.6467	23.4433	125.0133	2.414832352	6.09E-05	0.001056717	0.041332102	0.140142828	0.663588272	probable aquaporin TIP3-2 [Brassica rapa]	-	-	-	GO:0051234//establishment of localization
ncbi_106346846	LOC106346846	1.04	0.8	0.24	7.58	7.52	2.46	0.1	0.05	0.33	0.16	5.8533	0.6933	-3.077637411	0.000131479	0.002048256	-2.115477217	0.107981562	0.590595103	histone-lysine N-methyltransferase, H3 lysine-9 specific SUVH7-like [Brassica rapa]	ko00310//Lysine degradation	-	-	GO:0044763//single-organism cellular process
ncbi_106346895	LOC106346895	4.87	10.32	11.56	17.19	12.99	22.08	0.59	0.57	0.97	0.71	17.42	8.9167	-0.966168233	0.357227264	0.786665097	-3.650613556	6.85E-09	9.59E-07	BnaA06g12390D [Brassica napus]	-	-	-	GO:1902410//mitotic cytokinetic process
ncbi_106346903	LOC106346903	0.14	0.22	0.09	2.6	1.94	2.06	0.01	0	0	0.0033	2.2	0.15	-3.874469118	3.15E-17	4.24E-15	-5.491853096	0.008428898	0.118222333	BnaC05g14090D [Brassica napus]	-	-	-	GO:0048229//gametophyte development
ncbi_106346912	LOC106346912	0.16	0.17	0.19	4.04	2.01	3.23	0	0.02	0	0.0067	3.0933	0.1733	-4.157541277	2.23E-15	2.41E-13	-4.700439718	0.010479844	0.13845041	BnaA06g12680D [Brassica napus]	-	-	GO:0032550//purine ribonucleoside binding	-
ncbi_106346917	LOC106346917	2.77	2.93	3.14	5.87	7.59	8.04	1.03	1.26	1.01	1.1	7.1667	2.9467	-1.282218385	0.000560398	0.007025099	-1.421580345	0.005615627	0.087875284	rab9 effector protein with kelch motifs [Brassica rapa]	-	-	-	-
ncbi_106346926	LOC106346926	15.35	18.09	2.73	3.14	4.19	2.23	6.12	1.11	2.64	3.29	3.1867	12.0567	1.919711075	6.87E-05	0.001173659	-1.873671608	0.117464004	0.613989447	BnaA06g12890D [Brassica napus]	-	-	-	GO:0010243//response to organonitrogen compound
ncbi_106346936	LOC106346936	0.67	0.82	0.67	0.67	2.15	1.12	2.67	2.76	2.98	2.8033	1.3133	0.72	-0.867164317	0.636593353	0.960992109	1.961074488	2.42E-15	1.53E-12	BnaA06g13920D [Brassica napus]	-	GO:0031224//intrinsic component of membrane	-	-
ncbi_106346944	LOC106346944	4.52	0.28	1.75	12.15	2.37	3.45	0.23	0.02	0.12	0.1233	5.99	2.1833	-1.456023597	0.394214428	0.820209099	-4.145897731	0.001722779	0.035943806	BnaA01g26600D [Brassica napus]	-	GO:0043231//intracellular membrane-bounded organelle	-	-
ncbi_106346947	LOC106346947	0.52	0.71	0.45	0.64	0.89	1.06	2.49	5.72	0.46	2.89	0.8633	0.56	-0.624490865	0.98116204	0.995613743	2.36757076	0.000611149	0.015966736	BnaA06g13810D [Brassica napus]	-	-	-	GO:0051234//establishment of localization
ncbi_106346953	BNAA06G13700D	0.07	0.19	0.09	0.3	0.51	0.4	0.28	1.87	0.17	0.7733	0.4033	0.1167	-1.78958022	0.049024514	0.238597345	2.728697978	0.001906538	0.038970128	BnaA06g13700D [Brassica napus]	-	GO:0043231//intracellular membrane-bounded organelle	-	-
ncbi_106346955	LOC106346955	10.87	14.45	26.9	80.91	58.48	93.66	1.03	0.64	2.39	1.3533	77.6833	17.4067	-2.15796515	5.32E-05	0.000938619	-3.685050825	5.13E-07	4.12E-05	sugar transporter ERD6-like 4 [Brassica rapa]	-	-	-	GO:0051234//establishment of localization
ncbi_106346958	LOC106346958	1.81	2.03	1.91	5.26	3.33	7.36	0.41	0.43	0.59	0.4767	5.3167	1.9167	-1.471922563	0.013099011	0.090530827	-2.007546809	0.000100252	0.003634879	3-ketoacyl-CoA synthase 4 [Brassica rapa]	ko01100//Metabolic pathways;ko01110//Biosynthesis of secondary metabolites;ko04626//Plant-pathogen interaction;ko00062//Fatty acid elongation	-	GO:0016746//transferase activity, transferring acyl groups	-
ncbi_106346967	BNAA06G13440D	7.94	12.03	9.84	21.84	19.36	23.54	2.3	1.78	3.41	2.4967	21.58	9.9367	-1.11886099	0.009242731	0.069038981	-1.992758752	9.35E-05	0.00342968	BnaC05g14990D [Brassica napus]	-	GO:0043231//intracellular membrane-bounded organelle	-	-
ncbi_106346968	LOC106346968	0.69	0.57	0.4	0.28	0.08	0.04	0.36	0.22	0.73	0.4367	0.1333	0.5533	2.053111336	0.001450284	0.015510524	-0.34161643	0.760894347	0.999767122	pathogenesis-related protein 5-like isoform X2 [Brassica rapa]	-	-	-	GO:0051707//response to other organism
ncbi_106346971	LOC106346971	0.48	0.66	0.29	0.04	0.25	0.03	1.2	1.55	0.62	1.1233	0.1067	0.4767	2.159871337	0.005250301	0.044119036	1.236733444	0.004345597	0.073085368	BnaA06g13380D [Brassica napus]	-	-	-	GO:0048827//phyllome development
ncbi_106346992	LOC106346992	163.22	187.62	196.12	108.62	71.49	77.31	175	239.59	255.31	223.3	85.8067	182.32	1.087311184	3.75E-16	4.37E-14	0.292510421	0.001117082	0.025762806	BnaC02g16370D [Brassica napus]	-	GO:0043231//intracellular membrane-bounded organelle	-	-
ncbi_106347016	LOC106347016	0.13	0.65	0.57	0.11	0.18	0.16	0.02	0.07	0.19	0.0933	0.15	0.45	1.584962501	0.00310507	0.029006478	-2.269460675	0.115832353	0.609780323	retrotransposon ORF-1 protein [Arabidopsis thaliana]	-	-	-	-
ncbi_106347021	LOC106347021	8.92	7.01	10.13	70.88	34.92	81.27	2.22	0.87	2.37	1.82	62.3567	8.6867	-2.843669226	5.35E-10	2.84E-08	-2.254864228	0.00017329	0.005743463	BnaC06g43050D [Brassica napus]	-	-	-	GO:0051301//cell division
ncbi_106347025	LOC106347025	3.85	26.79	4.87	0.72	1.95	0.29	42.16	818.87	22.74	294.59	0.9867	11.8367	3.584556279	1.65E-06	4.42E-05	4.637373693	1	1	BnaCnng28630D [Brassica napus]	-	-	-	GO:0044707//single-multicellular organism process
ncbi_106347028	LOC106347028	0.35	1.34	1.18	2.83	5.18	5.5	0.07	0.07	0.17	0.1033	4.5033	0.9567	-2.234905033	0.00247647	0.024084791	-3.210710616	0.00229428	0.044841046	protein tesmin/TSO1-like CXC 3 isoform X1 [Brassica rapa]	-	-	-	GO:0045165//cell fate commitment
ncbi_106347059	LOC106347059	0.04	0.43	0.16	0.41	9.64	4.27	0	0.25	0.1	0.1167	4.7733	0.21	-4.506535854	0.000861746	0.009998909	-0.847996907	0.904035435	0.999767122	BnaCnng58890D [Brassica napus]	-	-	-	-
ncbi_106347061	LOC106347061	9.13	7.5	8.65	9.14	7.37	7.55	18.15	23.24	15.52	18.97	8.02	8.4267	0.071359821	1.79E-05	0.00036216	1.170685716	3.46E-09	5.27E-07	phospholipase D delta [Brassica rapa]	ko01100//Metabolic pathways;ko01110//Biosynthesis of secondary metabolites;ko04144//Endocytosis;ko00564//Glycerophospholipid metabolism;ko00565//Ether lipid metabolism	-	GO:0046872//metal ion binding	-
ncbi_106347066	LOC106347066	3.7	4.79	4.48	10.63	8.71	10.31	1.85	1.73	1.83	1.8033	9.8833	4.3233	-1.192853625	0.001750983	0.018078029	-1.26147798	0.01825083	0.20186298	BnaA06g14160D [Brassica napus]	-	-	-	-
ncbi_106347067	LOC106347067	2.4	2.67	3.82	1.22	1.68	1.14	4.19	0.76	10.11	5.02	1.3467	2.9633	1.137828126	3.11E-07	9.86E-06	0.760466446	0.117495468	0.614010518	BnaA06g14180D [Brassica napus]	-	-	-	GO:0045184//establishment of protein localization
ncbi_106347079	LOC106347079	4.95	4.84	2.47	0.3	0.7	0.29	2.34	0.42	2.12	1.6267	0.43	4.0867	3.248516008	7.43E-14	6.62E-12	-1.329005926	0.275037185	0.871183464	BnaCnng49510D [Brassica napus]	-	GO:0043231//intracellular membrane-bounded organelle	-	-
ncbi_106347099	LOC106347099	0.88	1.98	2.31	3.4	13.64	10.44	0.44	0.28	0.64	0.4533	9.16	1.7233	-2.410145819	0.002065335	0.020721873	-1.926557629	0.025270883	0.250842159	BnaA01g14850D [Brassica napus]	-	-	-	-
ncbi_106347134	LOC106347134	2.65	2.43	2.23	6.94	5.64	6.47	2.54	2.06	2.17	2.2567	6.35	2.4367	-1.381847686	1.32E-05	0.000277894	-0.110715572	0.046431147	0.366312147	BnaC05g20380D [Brassica napus]	ko03040//Spliceosome	-	GO:0042623//ATPase activity, coupled	-
ncbi_106347166	LOC106347166	0.91	1.47	0.81	3.95	1.96	2.35	0.09	0.06	0.03	0.06	2.7533	1.0633	-1.372585358	0.074837861	0.318309348	-4.147487612	1.56E-05	0.00076206	3-ketoacyl-CoA synthase 5 [Brassica rapa]	ko01100//Metabolic pathways;ko01110//Biosynthesis of secondary metabolites;ko04626//Plant-pathogen interaction;ko00062//Fatty acid elongation	-	-	GO:0065008//regulation of biological quality
ncbi_106347169	BNAA09G54510D	10.4	5.41	10.3	2.13	1.74	1.42	19.3	18.8	21.86	19.9867	1.7633	8.7033	2.30326283	7.20E-17	9.17E-15	1.199397926	8.98E-07	6.69E-05	BnaC05g51010D [Brassica napus]	-	GO:0044424//intracellular part	-	-
ncbi_106347170	LOC106347170	4.12	4.56	4.26	14.33	14.85	15.04	1.67	1.15	0.82	1.2133	14.74	4.3133	-1.772861408	1.14E-24	3.11E-22	-1.829827262	0.000457295	0.012694673	BnaC05g20690D [Brassica napus]	-	-	-	GO:0046942//carboxylic acid transport
ncbi_106347176	LOC106347176	0.82	0.55	0.42	5.02	4.1	3.84	0.29	0.06	0.53	0.2933	4.32	0.5967	-2.856034226	1.23E-08	5.16E-07	-1.024384159	0.622527935	0.999767122	nucleolar transcription factor 1 [Brassica rapa]	-	-	-	-
ncbi_106347182	LOC106347182	2.36	3.07	2.87	9.73	5.59	7.4	0.54	0.54	0.72	0.6	7.5733	2.7667	-1.452779593	0.006957039	0.0553815	-2.20511443	0.000460808	0.012772435	histone chaperone RTT106 [Brassica rapa]	-	-	-	-
ncbi_106347183	LOC106347183	1.66	2.37	1.66	2.39	1.51	1.57	0	0.03	0	0.01	1.8233	1.8967	0.05688782	0.03280532	0.178516745	-7.567322342	1.30E-07	1.24E-05	serine carboxypeptidase-like 46 [Brassica rapa]	-	-	-	GO:0016485//protein processing
ncbi_106347204	LOC106347204	0.96	1.27	1.36	1.1	0.83	0.75	0.11	0.14	0.4	0.2167	0.8933	1.1967	0.421750843	0.00011655	0.001856865	-2.465472221	0.00181816	0.037550108	BnaC03g51830D [Brassica napus]	ko04016//MAPK signaling pathway - plant	-	-	GO:0048437//floral organ development
ncbi_106347205	LOC106347205	6.22	5.13	5.4	12.41	11.38	11.26	4.58	5.19	4.05	4.6067	11.6833	5.5833	-1.065253349	0.003487795	0.03175108	-0.27740348	0.247264735	0.839794653	BnaC03g51800D [Brassica napus]	-	-	GO:0003676//nucleic acid binding	-
ncbi_106347210	LOC106347210	0.21	0.26	0.48	1.67	1.16	1.38	0.13	0.17	0.1	0.1333	1.4033	0.3167	-2.147820815	0.000117074	0.001862818	-1.247927513	0.315706931	0.912388325	BnaC03g51760D [Brassica napus]	-	-	GO:0032550//purine ribonucleoside binding	-
ncbi_106347212	LOC106347212	0.53	1.46	1.22	6.51	4.78	3.19	0.68	0.12	0.06	0.2867	4.8267	1.07	-2.1734164	0.001921219	0.019485275	-1.900164732	0.22387677	0.807833255	BnaC03g51740D [Brassica napus]	-	-	GO:0052689//carboxylic ester hydrolase activity	-
ncbi_106347266	LOC106347266	6.24	5.75	6.52	9.61	8.83	9.27	2.85	2.15	2.51	2.5033	9.2367	6.17	-0.582101816	0.728571655	0.969235251	-1.301420082	0.0024551	0.047064176	BnaC08g19340D [Brassica napus]	-	-	-	GO:0051726//regulation of cell cycle
ncbi_106347274	BNAC05G15840D	3.44	2.37	2.74	9.25	3.09	10.12	0.19	0.03	0.32	0.18	7.4867	2.85	-1.393361603	0.107326959	0.403005925	-3.984893108	6.26E-07	4.93E-05	BnaC05g15840D [Brassica napus]	-	GO:0043231//intracellular membrane-bounded organelle	-	-
ncbi_106347285	LOC106347285	0.24	0.49	0.53	0.23	0.18	0.17	0.83	1.1	0.36	0.7633	0.1933	0.42	1.119298928	0.00069296	0.008344912	0.861923865	0.021328248	0.224282611	prolyl endopeptidase [Brassica rapa]	-	-	-	GO:0016485//protein processing
ncbi_106347292	LOC106347292	2.88	2.92	3.28	9.39	6.67	9.29	1.85	1.01	2.73	1.8633	8.45	3.0267	-1.481221545	6.42E-05	0.001107711	-0.699844014	0.748545971	0.999767122	AT-rich interactive domain-containing protein 6 [Brassica rapa]	-	GO:0043231//intracellular membrane-bounded organelle	-	-
ncbi_106347300	LOC106347300	1.59	0.48	0.99	0.45	0.36	0.49	0.7	0.74	0.36	0.6	0.4333	1.02	1.23502003	0.00302249	0.028381683	-0.765534746	0.807137081	0.999767122	BnaA06g14860D [Brassica napus]	-	GO:0043231//intracellular membrane-bounded organelle	-	-
ncbi_106347316	LOC106347316	20.38	10.01	11.93	5	3.65	4.36	30.96	21.83	17.54	23.4433	4.3367	14.1067	1.701718665	1.56E-10	8.91E-09	0.73280059	0.002302212	0.044932425	CASP-like protein At5g54980 [Brassica rapa]	-	GO:0031224//intrinsic component of membrane	-	-
ncbi_106347323	LOC106347323	4.22	3.42	5.18	45.6	12.49	26.7	0.87	0.54	0.77	0.7267	28.2633	4.2733	-2.725497864	6.13E-06	0.000141476	-2.555996222	6.65E-08	6.94E-06	glucan endo-1,3-beta-glucosidase 12-like isoform X1 [Brassica rapa]	-	-	-	GO:0044238//primary metabolic process
ncbi_106347343	LOC106347343	1.94	1.97	2.21	5.22	5.12	4.85	1.04	0.95	0.88	0.9567	5.0633	2.04	-1.311518312	0.000110798	0.001777553	-1.092480916	0.12228621	0.625047402	sequence-specific DNA binding transcription factor [Arabidopsis thaliana]	-	-	-	GO:0006351//transcription, DNA-templated
ncbi_106347367	LOC106347367	3.46	3.63	5.4	28.68	10.38	31	0.11	0.03	0.31	0.15	23.3533	4.1633	-2.487817511	2.85E-05	0.000541895	-4.794704665	1.16E-09	1.98E-07	BnaA06g15290D [Brassica napus]	-	GO:0043231//intracellular membrane-bounded organelle	-	-
ncbi_106347375	LOC106347375	2.64	2.02	15.84	126.8	48.26	136.66	0.02	0.02	0.05	0.03	103.9067	6.8333	-3.926554907	2.87E-05	0.00054587	-7.831483193	6.71E-10	1.22E-07	BnaA06g15390D [Brassica napus]	-	GO:0044437//vacuolar part	-	-
ncbi_106347376	LOC106347376	74.02	75.39	93.65	202.4	151.04	221.99	25.25	10.39	20.88	18.84	191.81	81.02	-1.243327947	0.004502456	0.038991458	-2.10447912	3.22E-05	0.0014066	BnaC05g17000D [Brassica napus]	-	GO:0044437//vacuolar part	-	-
ncbi_106347387	LOC106347387	6.52	5.73	3.9	18.16	8.83	13.66	1.4	1.01	1.44	1.2833	13.55	5.3833	-1.331721187	0.038318823	0.199878172	-2.068603814	1.83E-05	0.000872484	BnaA01g36890D [Brassica napus]	-	-	-	GO:0071555//cell wall organization
ncbi_106347391	LOC106347391	1.56	1.7	1.44	9.41	7.24	9.8	1	0.49	1.92	1.1367	8.8167	1.5667	-2.49253506	1.01E-16	1.26E-14	-0.462889018	0.849378019	0.999767122	BnaA06g15560D [Brassica napus]	-	-	-	GO:0044036//cell wall macromolecule metabolic process
ncbi_106347406	LOC106347406	4.54	1.9	3.07	5.4	7.89	5.48	19.58	12.07	11.66	14.4367	6.2567	3.17	-0.980911404	0.382772009	0.812675304	2.187182926	9.99E-10	1.74E-07	BnaAnng27730D [Brassica napus]	ko01100//Metabolic pathways;ko01230//Biosynthesis of amino acids;ko00630//Glyoxylate and dicarboxylate metabolism;ko00250//Alanine, aspartate and glutamate metabolism;ko00910//Nitrogen metabolism;ko00220//Arginine biosynthesis	-	GO:0046914//transition metal ion binding	-
ncbi_106347423	LOC106347423	0.05	0.08	0.02	0.66	0.62	0.95	0	0	0.04	0.0133	0.7433	0.05	-3.894009304	1.35E-06	3.71E-05	-1.906890596	0.558176374	0.999767122	CDPK-related kinase 6 [Brassica rapa]	-	-	GO:0046872//metal ion binding	-
ncbi_106347424	LOC106347424	1.28	0.68	1.01	4.08	3.39	2.67	0.79	1.28	0.51	0.86	3.38	0.99	-1.771522816	0.001866588	0.019054	-0.203091865	0.497165076	0.999767122	protein ABIL2 [Brassica rapa]	-	-	-	GO:0022622//root system development
ncbi_106347430	LOC106347430	1.29	2.37	1.17	4.02	13.93	5.26	1.46	0.54	0.49	0.83	7.7367	1.61	-2.264651429	0.00269596	0.025825758	-0.955877447	0.538901069	0.999767122	probable pectinesterase/pectinesterase inhibitor 34 [Brassica rapa]	-	-	-	GO:0071555//cell wall organization
ncbi_106347433	LOC106347433	0.95	0.8	0.9	2.94	2.23	2.72	0.85	0.65	0.93	0.81	2.63	0.8833	-1.574032941	5.84E-05	0.001018395	-0.125036046	0.164001967	0.713422161	pentatricopeptide repeat-containing protein At3g49170, chloroplastic [Brassica rapa]	-	-	-	GO:0003006//developmental process involved in reproduction
ncbi_106347436	LOC106347436	4.14	5.75	4.1	11.07	10.4	9.52	1.48	1.42	1.96	1.62	10.33	4.6633	-1.147406792	0.004257949	0.037284366	-1.525367744	0.00303048	0.055327266	BnaA06g16140D [Brassica napus]	-	-	-	GO:0044710//single-organism metabolic process
ncbi_106347437	LOC106347437	0.98	1.02	0.73	0.28	0.46	0.28	0.53	0.08	0.33	0.3133	0.34	0.91	1.420331799	1.41E-05	0.000294667	-1.538168289	0.190504606	0.757891835	peroxidase 34-like [Brassica rapa]	ko01100//Metabolic pathways;ko01110//Biosynthesis of secondary metabolites;ko00940//Phenylpropanoid biosynthesis	-	-	GO:0052166//positive regulation by symbiont of host innate immune response
ncbi_106347492	LOC106347492	222.2	131.4	287.71	49.8	44.81	23.33	63.72	51.75	94.71	70.06	39.3133	213.77	2.442968804	8.14E-14	7.24E-12	-1.609396509	0.015237835	0.178515183	serine carboxypeptidase-like 48 [Brassica rapa]	-	-	-	GO:0016485//protein processing
ncbi_106347494	LOC106347494	4.79	5.24	5.38	13.34	10.39	12.94	2.48	2.18	3.26	2.64	12.2233	5.1367	-1.250733404	5.33E-05	0.000939112	-0.960294526	0.138015637	0.658377681	BnaA06g18580D [Brassica napus]	-	-	-	GO:0032958//inositol phosphate biosynthetic process
ncbi_106347499	LOC106347499	2.15	1.17	1.95	1.28	0.59	0.72	2.2	0.05	1.76	1.3367	0.8633	1.7567	1.024850864	0.000681887	0.008246401	-0.394200725	0.895577113	0.999767122	BnaA09g35210D [Brassica napus]	-	-	-	-
ncbi_106347506	LOC106347506	1.38	1.41	0.97	0.57	0.81	0.3	1.29	1.8	2.04	1.71	0.56	1.2533	1.162271429	4.95E-05	0.000879464	0.448226164	0.004241943	0.071816709	probable L-type lectin-domain containing receptor kinase I.5 isoform X1 [Brassica rapa]	-	-	GO:0032550//purine ribonucleoside binding	-
ncbi_106347516	LOC106347516	15.86	19.99	15.3	39.72	30.28	44.39	7.78	4.52	6.59	6.2967	38.13	17.05	-1.161154792	0.009567636	0.070942085	-1.437111538	0.001888113	0.038700367	WAT1-related protein At3g45870 isoform X1 [Brassica rapa]	-	-	-	-
ncbi_106347522	LOC106347522	4.34	2.28	5.76	31.48	6.7	26.55	3.86	1.79	3.89	3.18	21.5767	4.1267	-2.386423189	0.00293328	0.027690857	-0.375950143	0.702488279	0.999767122	BnaA09g30260D [Brassica napus]	-	GO:0005911//cell-cell junction	-	-
ncbi_106347525	LOC106347525	0.32	0.16	0	7.04	1.28	4.98	0	0	0.11	0.0367	4.4333	0.16	-4.79224803	0.00010393	0.001683262	-2.125530882	0.586545345	0.999767122	TPA: histone H4.3 [Zea mays]	-	-	GO:0046983//protein dimerization activity	-
ncbi_106347540	LOC106347540	4.7	3.3	2.66	20.3	13.34	29.09	0.84	0.77	0.67	0.76	20.91	3.5533	-2.556948125	4.33E-07	1.33E-05	-2.225101709	0.000284327	0.008575514	BnaAnng39380D [Brassica napus]	ko04144//Endocytosis	-	-	-
ncbi_106347551	LOC106347551	8.25	11.31	7.99	23.31	21.31	21.16	7.83	7.36	6.31	7.1667	21.9267	9.1833	-1.255596689	0.00017849	0.002657839	-0.357715659	0.348286395	0.937381575	protein TOC75-3, chloroplastic [Brassica rapa]	-	-	-	GO:0044743//intracellular protein transmembrane import
ncbi_106347554	LOC106347554	11.43	13.85	14.57	30.45	24.7	37.57	7.1	6.7	8.09	7.2967	30.9067	13.2833	-1.218300842	0.005187778	0.043688693	-0.86430777	0.219159175	0.800996737	BnaA06g17850D [Brassica napus]	ko04144//Endocytosis	-	-	GO:0045184//establishment of protein localization
ncbi_106347558	LOC106347558	23.05	38.07	27.05	88.95	94.06	106.53	7.97	7.56	11.71	9.08	96.5133	29.39	-1.715402906	5.17E-07	1.56E-05	-1.694561156	0.000801756	0.019899473	tubulin beta-2 chain [Camelina sativa]	ko04145//Phagosome	-	-	GO:0043623//cellular protein complex assembly
ncbi_106347560	LOC106347560	1.87	2.4	2.58	10.86	9.28	7.97	0.74	0.75	0.07	0.52	9.37	2.2833	-2.036907561	4.32E-08	1.63E-06	-2.134557959	0.058781752	0.42245843	deoxyuridine 5'-triphosphate nucleotidohydrolase [Brassica rapa]	ko01100//Metabolic pathways;ko00240//Pyrimidine metabolism	-	GO:0047429//nucleoside-triphosphate diphosphatase activity	-
ncbi_106347579	LOC106347579	0.64	0.3	0.17	0	0	0	1.11	0.43	0.62	0.72	0	0.37	8.531381461	1.69E-07	5.65E-06	0.960471636	0.029449682	0.275592443	receptor-like protein 12 isoform X3 [Brassica rapa]	-	-	-	-
ncbi_106347587	LOC106347587	35.48	32.58	35.26	94.93	62.65	80.57	17.41	9.84	19.57	15.6067	79.3833	34.44	-1.204751	0.002523471	0.024467846	-1.141922709	0.060712599	0.430931684	BnaA01g37290D [Brassica napus]	-	-	GO:0051540//metal cluster binding	-
ncbi_106347591	LOC106347591	40.8	36.14	33.68	45.95	21.49	18.17	2.22	0.78	2.29	1.7633	28.5367	36.8733	0.369761016	0.008013347	0.062042844	-4.386200715	1.20E-19	1.96E-16	dirigent protein 3 [Brassica rapa]	-	-	-	GO:0033554//cellular response to stress
ncbi_106347603	LOC106347603	0.2	0.08	0.02	0	0	0.02	0.3	0.53	0.19	0.34	0.0067	0.1	3.906890596	0.002418409	0.023636433	1.765534746	0.017995402	0.199759757	BnaC03g57190D [Brassica napus]	-	-	GO:0032550//purine ribonucleoside binding	-
ncbi_106347619	LOC106347619	5.14	3.7	4.47	16.73	10.93	23.19	0.95	0.78	1.03	0.92	16.95	4.4367	-1.933737203	0.00010436	0.001689578	-2.269770399	2.29E-06	0.000149488	BnaC03g53090D [Brassica napus]	-	-	-	GO:0044238//primary metabolic process
ncbi_106347628	LOC106347628	0.14	0.37	0.29	1.17	1.2	1.11	0.17	0.03	0.06	0.0867	1.16	0.2667	-2.121015401	0.000395658	0.005202441	-1.621488377	0.350251899	0.939388825	transcription factor TCP14 [Brassica rapa]	-	-	-	GO:0090567//reproductive shoot system development
ncbi_106347636	LOC106347636	0.51	0.33	0.56	2.16	1.94	1.98	0.46	0.22	0.38	0.3533	2.0267	0.4667	-2.118644496	1.45E-08	6.01E-07	-0.401362562	0.709368767	0.999767122	BnaCnng36310D [Brassica napus]	-	-	-	GO:0051276//chromosome organization
ncbi_106347644	BNACNNG69290D	6.8	4.2	5.81	4.32	3.68	4.46	11.98	11.54	10.67	11.3967	4.1533	5.6033	0.432015656	4.90E-05	0.000872924	1.024254698	7.14E-08	7.39E-06	BnaCnng69290D [Brassica napus]	-	GO:0043231//intracellular membrane-bounded organelle	-	-
ncbi_106347651	LOC106347651	6.9	7.76	10.22	29.21	30.17	39.15	4.28	4.9	4.77	4.65	32.8433	8.2933	-1.985576572	5.99E-10	3.16E-08	-0.834721363	0.416951108	0.982550467	BnaC07g34670D [Brassica napus]	-	-	GO:0097159//organic cyclic compound binding	-
ncbi_106347657	LOC106347657	5.85	7.92	6.05	27.78	12.43	24.74	1.06	0.42	2.47	1.3167	21.65	6.6067	-1.712372563	0.001135847	0.012672364	-2.327032404	0.005288687	0.084400637	BnaA03g43320D [Brassica napus]	ko01100//Metabolic pathways;ko00500//Starch and sucrose metabolism	-	-	GO:0044093//positive regulation of molecular function
ncbi_106347665	LOC106347665	5.19	5.16	6.34	11.12	11.92	11.51	4.87	3.83	4	4.2333	11.5167	5.5633	-1.049701756	0.003289897	0.030359291	-0.394155458	0.411577559	0.978158949	histone deacetylase 9 [Brassica rapa]	-	GO:0043231//intracellular membrane-bounded organelle	-	-
ncbi_106347677	LOC106347677	0.71	1.08	1.46	4.44	3.23	4.5	0.05	0.26	0.18	0.1633	4.0567	1.0833	-1.904817545	0.000153794	0.002341791	-2.729586064	0.005829947	0.090378054	BnaC02g38940D [Brassica napus]	-	-	-	GO:0044238//primary metabolic process
[truncated: 8,808 more rows]
