# Supplementary material for: Effects of Low Nighttime Temperature on Fatty Acid Content in Developing Seeds from Brassica napus L. Based on RNA-Seq and Metabolome
Source: Plants (Basel). 2023 Jan 10;12(2):325. doi: 10.3390/plants12020325 (PMC9862530; doi:10.3390/plants12020325)
Supplement: Supplementary file 1 [file plants-12-00325-s001.zip › Table S8.xls]

Table S8 GO functional annotation on SSE18vs.SFE18vs.STE18.
GO ID (level1)	GO Term (level1)	GO ID (level2)	GO Term (level2)	Gene Number(SFE18-vs-STE18_up)	Gene Number(SFE18-vs-STE18_down)	Gene List(SFE18-vs-STE18_up)	Gene List(SFE18-vs-STE18_down)	Gene Number(SSE18-vs-SFE18_up)	Gene Number(SSE18-vs-SFE18_down)	Gene List(SSE18-vs-SFE18_up)	Gene List(SSE18-vs-SFE18_down)
GO:0003674	Molecular Function	GO:0000988	transcription factor activity, protein binding	1	0	MSTRG.71354(MBF1C)	--	0	2	--	MSTRG.62993(HFR1),MSTRG.72639(RGA1)
GO:0003674	Molecular Function	GO:0001071	nucleic acid binding transcription factor activity	12	12	MSTRG.38852(NAC002),MSTRG.44622(NAC079),MSTRG.47211(AIL1),MSTRG.47252(--),MSTRG.47278(MYB54),MSTRG.57872(ARF1),MSTRG.60418(DOF1.3),MSTRG.68555(SMZ),MSTRG.71354(MBF1C),MSTRG.84293(RE2),MSTRG.89908(BHLH140),MSTRG.92150(IAA26)	MSTRG.10544(MYB101),MSTRG.12429(SCL27),MSTRG.16463(BHLH71),MSTRG.25598(IDD4),MSTRG.25612(IDD4),MSTRG.31362(BLH2),MSTRG.34833(MYB101),MSTRG.42142(RR21),MSTRG.68446(IDD5),MSTRG.71346(HDG12),ncbi_106349371(LOC106349371),ncbi_106366461(LOC106366461)	4	12	MSTRG.47211(AIL1),MSTRG.48616(PIF6),MSTRG.60418(DOF1.3),MSTRG.68555(SMZ)	MSTRG.10544(MYB101),MSTRG.12429(SCL27),MSTRG.25598(IDD4),MSTRG.29697(ATHB-15),MSTRG.34833(MYB101),MSTRG.53060(ARF11),MSTRG.62993(HFR1),MSTRG.71346(HDG12),MSTRG.72639(RGA1),MSTRG.75579(ARR10),MSTRG.85091(MYB3),MSTRG.86033(BZIP25)
GO:0003674	Molecular Function	GO:0003824	catalytic activity	305	459	MSTRG.10815(PI1),MSTRG.13220(ICL),MSTRG.14410(abhd17c),MSTRG.15452(CSE),MSTRG.16565(TPS09),MSTRG.17603(PI1),MSTRG.18548(DHDPS2),MSTRG.19828(PI4KA1),MSTRG.21863(CDKF-4),MSTRG.22276(ICS1),MSTRG.233(NAGS2),MSTRG.25421(BGLU3),MSTRG.26388(SAHH2),MSTRG.28006(CLPB1),MSTRG.29117(ARAC5),MSTRG.3256(BGLU19),MSTRG.34839(CSLB3),MSTRG.35403(PRS2),MSTRG.36353(GLC1),MSTRG.38750(BGLU11),MSTRG.38808(KCS1),MSTRG.39…	MSTRG.10685(PER21),MSTRG.12429(SCL27),MSTRG.12765(CRSH),MSTRG.13032(GAD4),MSTRG.13927(PUB4),MSTRG.14515(carC),MSTRG.14753(FEY),MSTRG.15809(ADPG2),MSTRG.16007(MVD2),MSTRG.16398(YUC10),MSTRG.17345(SCPL26),MSTRG.18719(GAUT12),MSTRG.19530(CYP97A3),MSTRG.2126(PORB),MSTRG.21775(PYRE-F),MSTRG.21846(At5g67130),MSTRG.21876(BCE2),MSTRG.2260(PSAN),MSTRG.23439(RHF1A),MSTRG.23456(--),MSTRG.2483(COMT2),MSTRG.2…	124	397	MSTRG.10815(PI1),MSTRG.13220(ICL),MSTRG.14150(TPS07),MSTRG.14866(SCT),MSTRG.15809(ADPG2),MSTRG.16565(TPS09),MSTRG.25421(BGLU3),MSTRG.30797(RPN2),MSTRG.30828(BGLU3),MSTRG.31164(PXG1),MSTRG.31165(PXG1),MSTRG.3256(BGLU19),MSTRG.35858(ABCA11),MSTRG.37335(TGG2),MSTRG.38750(BGLU11),MSTRG.41535(--),MSTRG.46021(At5g65490),MSTRG.48731(ddx11),MSTRG.50681(--),MSTRG.53481(BDG3),MSTRG.54705(At2g39360),MSTRG.5…	MSTRG.10454(BIP2),MSTRG.10685(PER21),MSTRG.12429(SCL27),MSTRG.13032(GAD4),MSTRG.16361(IBS1),MSTRG.18642(GES),MSTRG.19898(ABCC4),MSTRG.2126(PORB),MSTRG.2230(At4g28400),MSTRG.2260(PSAN),MSTRG.23456(--),MSTRG.24240(HAM1),MSTRG.25692(FPS1),MSTRG.25796(GLC1),MSTRG.26139(DRP1C),MSTRG.26835(LKR/SDH),MSTRG.28101(CYP709B1),MSTRG.28113(At1g71691),MSTRG.28552(XYL1),MSTRG.31232(HSP70-6),MSTRG.33806(ACS10),MS…
GO:0003674	Molecular Function	GO:0004871	signal transducer activity	1	2	ncbi_106431123(LOC106431123)	ncbi_106396130(LOC106396130),ncbi_106428480(LOC106428480)	1	1	ncbi_106431123(LOC106431123)	ncbi_106355951(LOC106355951)
GO:0003674	Molecular Function	GO:0005198	structural molecule activity	2	7	MSTRG.84493(RPL37B),ncbi_106357693(LOC106357693)	MSTRG.47725(RPS6),MSTRG.55374(TUBB2),MSTRG.68450(ARP4),MSTRG.69887(TUBA2),MSTRG.85633(ACT2),ncbi_106395176(LOC106395176),ncbi_111215572(LOC111215572)	2	5	MSTRG.36629(PIP1-2),MSTRG.36630(--)	MSTRG.28077(RPL10A),MSTRG.55374(TUBB2),MSTRG.57987(RPS2A),MSTRG.7772(RPL12A),ncbi_106361083(LOC106361083)
GO:0003674	Molecular Function	GO:0005215	transporter activity	40	50	MSTRG.22615(NHX8),MSTRG.30262(OEP162),MSTRG.33299(CHX20),MSTRG.33300(CHX20),MSTRG.40007(--),MSTRG.6156(OPT8),MSTRG.61818(AIP1),MSTRG.64079(NHX8),MSTRG.76065(DTX21),MSTRG.76521(ZIFL2),MSTRG.77786(CHX20),MSTRG.82230(MRS2-1),ncbi_106360260(LOC106360260),ncbi_106365210(LOC106365210),ncbi_106366453(LOC106366453),ncbi_106372659(LOC106372659),ncbi_106375273(LOC106375273),ncbi_106376136(LOC106376136),ncb…	MSTRG.23258(LAX2),MSTRG.23319(MRS2-1),MSTRG.23467(MRS2-1),MSTRG.35132(ALA9),MSTRG.38674(CDC48E),MSTRG.40380(DIT1),MSTRG.40849(--),MSTRG.4263(CAT7),MSTRG.45579(ABCG25),MSTRG.50979(At5g16150),MSTRG.50980(At5g16150),MSTRG.56706(At1g75220),MSTRG.56792(VPS45),MSTRG.59344(NAT12),MSTRG.59845(HMA5),MSTRG.82519(AHA3),ncbi_106347489(LOC106347489),ncbi_106348621(LOC106348621),ncbi_106348623(LOC106348623),nc…	17	30	MSTRG.13327(--),MSTRG.13328(--),MSTRG.19957(TDT),MSTRG.36629(PIP1-2),MSTRG.40007(--),MSTRG.64079(NHX8),MSTRG.82230(MRS2-1),MSTRG.84295(TDT),ncbi_106397154(LOC106397154),ncbi_106400489(LOC106400489),ncbi_106408374(LOC106408374),ncbi_106412072(LOC106412072),ncbi_106419148(LOC106419148),ncbi_106419519(LOC106419519),ncbi_106444421(LOC106444421),ncbi_106452371(LOC106452371),ncbi_111201530(LOC111201530)	MSTRG.10286(TATB),MSTRG.1567(CSC1),MSTRG.19898(ABCC4),MSTRG.34996(RPS12A),MSTRG.40380(DIT1),MSTRG.43719(VPS45),MSTRG.45579(ABCG25),MSTRG.50979(At5g16150),MSTRG.50980(At5g16150),MSTRG.56706(At1g75220),MSTRG.56792(VPS45),MSTRG.6156(OPT8),MSTRG.70024(ABCG25),MSTRG.70025(ABCG25),MSTRG.80560(ABCC4),ncbi_106348621(LOC106348621),ncbi_106348623(LOC106348623),ncbi_106352625(LOC106352625),ncbi_106352785(LO…
GO:0003674	Molecular Function	GO:0005488	binding	779	1076	MSTRG.18461(--),MSTRG.19763(JAL5),MSTRG.19828(PI4KA1),MSTRG.22076(PP2B15),MSTRG.28006(CLPB1),MSTRG.28548(JAL22),MSTRG.29117(ARAC5),MSTRG.3256(BGLU19),MSTRG.34716(SCL30A),MSTRG.35198(At3g49725),MSTRG.35403(PRS2),MSTRG.37722(RBP45B),MSTRG.38211(At1g50590),MSTRG.39206(ABI2),MSTRG.39360(LAC16),MSTRG.39445(OVA6),MSTRG.44195(RZ1B),MSTRG.44327(SDH),MSTRG.44607(RH51),MSTRG.46021(At5g65490),MSTRG.46153(CE…	MSTRG.10544(MYB101),MSTRG.10685(PER21),MSTRG.11098(SPH11),MSTRG.12221(MYBC1),MSTRG.12429(SCL27),MSTRG.13032(GAD4),MSTRG.13549(PDV2),MSTRG.15527(--),MSTRG.15847(UBA2A),MSTRG.15891(WLIM2B),MSTRG.16007(MVD2),MSTRG.16398(YUC10),MSTRG.16463(BHLH71),MSTRG.18049(At2g47850),MSTRG.18549(ZPR1),MSTRG.18625(LHCB4.3),MSTRG.18719(GAUT12),MSTRG.19530(CYP97A3),MSTRG.20679(NSP1),MSTRG.21876(BCE2),MSTRG.2260(PSAN)…	245	1015	MSTRG.13327(--),MSTRG.13328(--),MSTRG.19763(JAL5),MSTRG.31164(PXG1),MSTRG.31165(PXG1),MSTRG.3256(BGLU19),MSTRG.34716(SCL30A),MSTRG.37335(TGG2),MSTRG.46021(At5g65490),MSTRG.48616(PIF6),MSTRG.48731(ddx11),MSTRG.4884(OlnB1),MSTRG.48989(--),MSTRG.55536(GAD2),MSTRG.57591(AAK6),MSTRG.57928(BGLU29),MSTRG.60418(DOF1.3),MSTRG.64114(BGLU19),MSTRG.64292(ABI5),MSTRG.67391(YUC10),MSTRG.6777(ASK4),MSTRG.68555(…	MSTRG.10454(BIP2),MSTRG.10544(MYB101),MSTRG.10685(PER21),MSTRG.11098(SPH11),MSTRG.12429(SCL27),MSTRG.13032(GAD4),MSTRG.14793(At2g25060),MSTRG.14893(VLN4),MSTRG.15847(UBA2A),MSTRG.16361(IBS1),MSTRG.18049(At2g47850),MSTRG.18642(GES),MSTRG.19898(ABCC4),MSTRG.21856(HAT),MSTRG.2230(At4g28400),MSTRG.2260(PSAN),MSTRG.23456(--),MSTRG.24240(HAM1),MSTRG.25150(SMC4),MSTRG.25151(SMC4),MSTRG.25598(IDD4),MSTRG…
GO:0003674	Molecular Function	GO:0016209	antioxidant activity	0	2	--	MSTRG.10685(PER21),MSTRG.49016(MSD1)	0	1	--	MSTRG.10685(PER21)
GO:0003674	Molecular Function	GO:0060089	molecular transducer activity	8	10	ncbi_106387427(LOC106387427),ncbi_106388090(LOC106388090),ncbi_106408934(LOC106408934),ncbi_106423014(LOC106423014),ncbi_106431123(LOC106431123),ncbi_106440463(LOC106440463),ncbi_106454333(LOC106454333),ncbi_111200464(LOC111200464)	ncbi_106358148(LOC106358148),ncbi_106358362(LOC106358362),ncbi_106370440(LOC106370440),ncbi_106394399(LOC106394399),ncbi_106396130(LOC106396130),ncbi_106409403(LOC106409403),ncbi_106425695(LOC106425695),ncbi_106428480(LOC106428480),ncbi_106443216(LOC106443216),ncbi_111197924(LOC111197924)	1	3	ncbi_106431123(LOC106431123)	ncbi_106355951(LOC106355951),ncbi_106358362(LOC106358362),ncbi_111214165(LOC111214165)
GO:0003674	Molecular Function	GO:0098772	molecular function regulator	13	5	MSTRG.10815(PI1),MSTRG.17603(PI1),MSTRG.57872(ARF1),ncbi_106354274(LOC106354274),ncbi_106356341(LOC106356341),ncbi_106387642(LOC106387642),ncbi_106391834(LOC106391834),ncbi_106394617(LOC106394617),ncbi_106402741(LOC106402741),ncbi_106406678(LOC106406678),ncbi_106427167(LOC106427167),ncbi_106454543(LOC106454543),ncbi_111215388(LOC111215388)	ncbi_106394586(LOC106394586),ncbi_106396330(LOC106396330),ncbi_106406661(LOC106406661),ncbi_106423941(LOC106423941),ncbi_106430798(LOC106430798)	4	12	MSTRG.10815(PI1),ncbi_106394617(LOC106394617),ncbi_106396330(LOC106396330),ncbi_111215388(LOC111215388)	MSTRG.85280(GLB1),ncbi_106354203(LOC106354203),ncbi_106354272(LOC106354272),ncbi_106354274(LOC106354274),ncbi_106394586(LOC106394586),ncbi_106400441(LOC106400441),ncbi_106402741(LOC106402741),ncbi_106406661(LOC106406661),ncbi_106406678(LOC106406678),ncbi_106423941(LOC106423941),ncbi_106423952(LOC106423952),ncbi_106432930(LOC106432930)
GO:0005575	Cellular Component	GO:0005576	extracellular region	6	17	MSTRG.39360(LAC16),MSTRG.44024(XTH11),MSTRG.77539(XTH25),MSTRG.78602(CPN60A1),ncbi_106365738(LOC106365738),ncbi_106416068(LOC106416068)	MSTRG.28086(PATL1),MSTRG.49916(MVP1),MSTRG.53617(XTH9),MSTRG.65902(dVPE),MSTRG.66230(SBT1.7),MSTRG.75074(XTH24),MSTRG.76570(HSP90-7),MSTRG.79188(--),MSTRG.79656(CSP41B),MSTRG.89448(ANNAT7),MSTRG.90739(FBP),ncbi_106375615(LOC106375615),ncbi_106376026(LOC106376026),ncbi_106390494(LOC106390494),ncbi_106429522(LOC106429522),ncbi_106440814(LOC106440814),ncbi_106441097(LOC106441097)	4	14	MSTRG.37335(TGG2),MSTRG.77539(XTH25),MSTRG.78602(CPN60A1),MSTRG.90021(PME3)	MSTRG.28552(XYL1),MSTRG.49221(TT10),MSTRG.49916(MVP1),MSTRG.49986(At1g53240),MSTRG.66230(SBT1.7),MSTRG.74842(--),MSTRG.75074(XTH24),MSTRG.79188(--),MSTRG.89448(ANNAT7),MSTRG.90739(FBP),ncbi_106390494(LOC106390494),ncbi_106401654(LOC106401654),ncbi_106429522(LOC106429522),ncbi_106440814(LOC106440814)
GO:0005575	Cellular Component	GO:0005623	cell	1121	1302	MSTRG.10815(PI1),MSTRG.11047(--),MSTRG.13220(ICL),MSTRG.16117(--),MSTRG.16377(VTI11),MSTRG.16565(TPS09),MSTRG.17603(PI1),MSTRG.18461(--),MSTRG.18548(DHDPS2),MSTRG.19762(F-ATMBP),MSTRG.19763(JAL5),MSTRG.19828(PI4KA1),MSTRG.21863(CDKF-4),MSTRG.22076(PP2B15),MSTRG.22276(ICS1),MSTRG.233(NAGS2),MSTRG.25421(BGLU3),MSTRG.25558(RCF3),MSTRG.26388(SAHH2),MSTRG.27078(HOS15),MSTRG.28006(CLPB1),MSTRG.28548(JA…	MSTRG.10544(MYB101),MSTRG.10685(PER21),MSTRG.11098(SPH11),MSTRG.12038(FH11),MSTRG.12429(SCL27),MSTRG.12765(CRSH),MSTRG.13032(GAD4),MSTRG.13549(PDV2),MSTRG.13947(COG4),MSTRG.15477(RPL3),MSTRG.15809(ADPG2),MSTRG.15847(UBA2A),MSTRG.16007(MVD2),MSTRG.16463(BHLH71),MSTRG.17345(SCPL26),MSTRG.18049(At2g47850),MSTRG.18613(--),MSTRG.18625(LHCB4.3),MSTRG.18719(GAUT12),MSTRG.19530(CYP97A3),MSTRG.20679(NSP1)…
51935),ncbi_106452142(LOC106452142),ncbi_106452180(LOC106452180),ncbi_106452182(LOC106452182),ncbi_106452233(LOC106452233),ncbi_106452495(LOC106452495),ncbi_106452619(LOC106452619),ncbi_106452629(LOC106452629),ncbi_106452677(LOC106452677),ncbi_106452702(LOC106452702),ncbi_106452709(LOC106452709),ncbi_106452802(LOC106452802),ncbi_106452930(LOC106452930),ncbi_106453118(LOC106453118),ncbi_106453172(…	370	1218	MSTRG.10815(PI1),MSTRG.11666(At1g56220),MSTRG.13220(ICL),MSTRG.14003(At4g09580),MSTRG.14148(TPS07),MSTRG.14150(TPS07),MSTRG.15809(ADPG2),MSTRG.16565(TPS09),MSTRG.19762(F-ATMBP),MSTRG.19763(JAL5),MSTRG.19957(TDT),MSTRG.25421(BGLU3),MSTRG.29116(AFP2),MSTRG.30797(RPN2),MSTRG.30828(BGLU3),MSTRG.31164(PXG1),MSTRG.31165(PXG1),MSTRG.3256(BGLU19),MSTRG.34716(SCL30A),MSTRG.35858(ABCA11),MSTRG.36629(PIP1-2…	MSTRG.10286(TATB),MSTRG.10454(BIP2),MSTRG.10544(MYB101),MSTRG.10685(PER21),MSTRG.11098(SPH11),MSTRG.12429(SCL27),MSTRG.13032(GAD4),MSTRG.14893(VLN4),MSTRG.15847(UBA2A),MSTRG.18049(At2g47850),MSTRG.18642(GES),MSTRG.20735(accB),MSTRG.2126(PORB),MSTRG.2260(PSAN),MSTRG.23167(IQD32),MSTRG.23898(--),MSTRG.24240(HAM1),MSTRG.24241(--),MSTRG.25150(SMC4),MSTRG.25151(SMC4),MSTRG.25598(IDD4),MSTRG.25692(FPS1…
87),ncbi_111205108(LOC111205108),ncbi_111205422(LOC111205422),ncbi_111205459(LOC111205459),ncbi_111206286(LOC111206286),ncbi_111206327(LOC111206327),ncbi_111206496(LOC111206496),ncbi_111206777(LOC111206777),ncbi_111207183(LOC111207183),ncbi_111207266(LOC111207266),ncbi_111207761(LOC111207761),ncbi_111207817(LOC111207817),ncbi_111207839(LOC111207839),ncbi_111208198(LOC111208198),ncbi_111208354(LOC…
GO:0005575	Cellular Component	GO:0016020	membrane	161	265	MSTRG.10441(At1g61900),MSTRG.15452(CSE),MSTRG.16117(--),MSTRG.22615(NHX8),MSTRG.26388(SAHH2),MSTRG.29117(ARAC5),MSTRG.30262(OEP162),MSTRG.33299(CHX20),MSTRG.33300(CHX20),MSTRG.34839(CSLB3),MSTRG.38808(KCS1),MSTRG.40007(--),MSTRG.41112(--),MSTRG.44327(SDH),MSTRG.46153(CER3),MSTRG.49992(VPS53),MSTRG.53737(At5g36290),MSTRG.54705(At2g39360),MSTRG.5720(KCS20),MSTRG.59840(TPLATE),MSTRG.6156(OPT8),MSTRG…	MSTRG.12038(FH11),MSTRG.13034(NPF8.4),MSTRG.13549(PDV2),MSTRG.15527(--),MSTRG.18625(LHCB4.3),MSTRG.18719(GAUT12),MSTRG.19530(CYP97A3),MSTRG.2126(PORB),MSTRG.2260(PSAN),MSTRG.23247(MAP70.5),MSTRG.23258(LAX2),MSTRG.26396(TMK4),MSTRG.28086(PATL1),MSTRG.30797(RPN2),MSTRG.34099(LHCA3),MSTRG.3474(TDR),MSTRG.3475(TDR),MSTRG.35132(ALA9),MSTRG.35743(At1g49730),MSTRG.36914(At3g61750),MSTRG.38674(CDC48E),MS…	101	207	MSTRG.13327(--),MSTRG.13328(--),MSTRG.16261(MUB6),MSTRG.1936(NPF5.2),MSTRG.19957(TDT),MSTRG.30797(RPN2),MSTRG.31164(PXG1),MSTRG.31165(PXG1),MSTRG.35858(ABCA11),MSTRG.36629(PIP1-2),MSTRG.40007(--),MSTRG.4884(OlnB1),MSTRG.52273(PRA1B3),MSTRG.54705(At2g39360),MSTRG.62239(--),MSTRG.64079(NHX8),MSTRG.6777(ASK4),MSTRG.72968(XCP2),MSTRG.7783(S2),MSTRG.7784(OL2),MSTRG.82230(MRS2-1),MSTRG.84148(At5g10020)…	MSTRG.10286(TATB),MSTRG.10454(BIP2),MSTRG.14793(At2g25060),MSTRG.1567(CSC1),MSTRG.19898(ABCC4),MSTRG.2126(PORB),MSTRG.2260(PSAN),MSTRG.23167(IQD32),MSTRG.26139(DRP1C),MSTRG.28077(RPL10A),MSTRG.29549(GRF9),MSTRG.30958(MCD1),MSTRG.40380(DIT1),MSTRG.41590(TLP1),MSTRG.43719(VPS45),MSTRG.45579(ABCG25),MSTRG.49916(MVP1),MSTRG.49940(ASP4),MSTRG.50497(OlnB1),MSTRG.50979(At5g16150),MSTRG.50980(At5g16150),…
GO:0005575	Cellular Component	GO:0019012	virion	0	1	--	MSTRG.85791(UGP2)	0	0	--	--
GO:0005575	Cellular Component	GO:0030054	cell junction	25	34	MSTRG.16565(TPS09),MSTRG.19763(JAL5),MSTRG.28548(JAL22),MSTRG.3256(BGLU19),MSTRG.36353(GLC1),MSTRG.44327(SDH),MSTRG.46626(JAL33),MSTRG.59840(TPLATE),MSTRG.62295(JAL23),MSTRG.64114(BGLU19),MSTRG.72623(BGLU23),MSTRG.74029(CEL3),MSTRG.84867(JAL5),ncbi_106346131(LOC106346131),ncbi_106395796(LOC106395796),ncbi_106400248(BNAA07G10370D),ncbi_106424482(LOC106424482),ncbi_106429758(LOC106429758),ncbi_1064…	MSTRG.20679(NSP1),MSTRG.21752(SPH6),MSTRG.21846(At5g67130),MSTRG.25796(GLC1),MSTRG.28086(PATL1),MSTRG.30797(RPN2),MSTRG.43881(--),MSTRG.46926(HVA22C),MSTRG.49916(MVP1),MSTRG.49940(ASP4),MSTRG.55055(--),MSTRG.55374(TUBB2),MSTRG.61316(--),MSTRG.66247(TSJT1),MSTRG.66797(GLUA2),MSTRG.69887(TUBA2),MSTRG.76570(HSP90-7),MSTRG.79656(CSP41B),MSTRG.82519(AHA3),MSTRG.85633(ACT2),ncbi_106354332(LOC106354332)…	18	26	MSTRG.13327(--),MSTRG.13328(--),MSTRG.14148(TPS07),MSTRG.16565(TPS09),MSTRG.19763(JAL5),MSTRG.30797(RPN2),MSTRG.3256(BGLU19),MSTRG.37335(TGG2),MSTRG.57928(BGLU29),MSTRG.64114(BGLU19),MSTRG.74372(TPS07),MSTRG.84867(JAL5),ncbi_106382689(LOC106382689),ncbi_106389282(LOC106389282),ncbi_106395796(LOC106395796),ncbi_106424470(LOC106424470),ncbi_106424471(LOC106424471),ncbi_106436105(LOC106436105)	MSTRG.10454(BIP2),MSTRG.25796(GLC1),MSTRG.26139(DRP1C),MSTRG.28552(XYL1),MSTRG.41381(--),MSTRG.49916(MVP1),MSTRG.49940(ASP4),MSTRG.52187(BIP2),MSTRG.53060(ARF11),MSTRG.55055(--),MSTRG.55374(TUBB2),MSTRG.57987(RPS2A),MSTRG.62295(JAL23),ncbi_106354332(LOC106354332),ncbi_106375085(BNAA01G30280D),ncbi_106386123(BNACNNG23680D),ncbi_106389412(LOC106389412),ncbi_106401544(LOC106401544),ncbi_106407100(LO…
GO:0005575	Cellular Component	GO:0031012	extracellular matrix	0	3	--	ncbi_106366447(LOC106366447),ncbi_106368983(LOC106368983),ncbi_106448058(LOC106448058)	1	3	MSTRG.4884(OlnB1)	ncbi_106366447(LOC106366447),ncbi_106419374(LOC106419374),ncbi_106448287(LOC106448287)
GO:0005575	Cellular Component	GO:0031974	membrane-enclosed lumen	22	6	MSTRG.34716(SCL30A),MSTRG.56777(CUL1),MSTRG.80528(CYTC-2),ncbi_106360854(LOC106360854),ncbi_106368927(LOC106368927),ncbi_106371469(LOC106371469),ncbi_106386550(LOC106386550),ncbi_106388218(LOC106388218),ncbi_106390204(LOC106390204),ncbi_106392074(LOC106392074),ncbi_106397002(LOC106397002),ncbi_106399304(LOC106399304),ncbi_106404770(LOC106404770),ncbi_106411650(LOC106411650),ncbi_106417705(LOC1064…	MSTRG.68450(ARP4),ncbi_106358257(LOC106358257),ncbi_106414352(LOC106414352),ncbi_106436163(LOC106436163),ncbi_106437579(LOC106437579),ncbi_106446896(LOC106446896)	1	20	MSTRG.34716(SCL30A)	MSTRG.28035(--),MSTRG.83984(--),ncbi_106345888(LOC106345888),ncbi_106346254(LOC106346254),ncbi_106347076(LOC106347076),ncbi_106361021(LOC106361021),ncbi_106361747(LOC106361747),ncbi_106372028(LOC106372028),ncbi_106387934(LOC106387934),ncbi_106390152(LOC106390152),ncbi_106397060(LOC106397060),ncbi_106409227(LOC106409227),ncbi_106417705(LOC106417705),ncbi_106419027(LOC106419027),ncbi_106422762(LOC1…
GO:0005575	Cellular Component	GO:0032991	macromolecular complex	56	73	MSTRG.27078(HOS15),MSTRG.38808(KCS1),MSTRG.49992(VPS53),MSTRG.54749(At2g14710),MSTRG.6163(PBE2),MSTRG.6777(ASK4),MSTRG.78582(PRP8A),MSTRG.78602(CPN60A1),MSTRG.84493(RPL37B),MSTRG.85905(At4g24830),MSTRG.86253(HMGA),MSTRG.92787(CP29B),ncbi_106345242(BNAA05G21400D),ncbi_106349374(LOC106349374),ncbi_106351324(LOC106351324),ncbi_106351755(LOC106351755),ncbi_106354737(LOC106354737),ncbi_106361337(LOC10…	MSTRG.15477(RPL3),MSTRG.18625(LHCB4.3),MSTRG.2260(PSAN),MSTRG.23247(MAP70.5),MSTRG.34099(LHCA3),MSTRG.38219(At1g75680),MSTRG.38251(KIN14N),MSTRG.40849(--),MSTRG.44423(TRB2),MSTRG.47725(RPS6),MSTRG.49916(MVP1),MSTRG.53967(NUP98B),MSTRG.55374(TUBB2),MSTRG.6572(--),MSTRG.68450(ARP4),MSTRG.69887(TUBA2),MSTRG.72133(DDM1),MSTRG.72362(LHCA3),MSTRG.76978(CAP10B),MSTRG.79656(CSP41B),MSTRG.82112(SPBC18H10.…	10	118	MSTRG.35858(ABCA11),MSTRG.36629(PIP1-2),MSTRG.36630(--),MSTRG.37335(TGG2),MSTRG.6777(ASK4),MSTRG.78602(CPN60A1),MSTRG.87639(UTP7),ncbi_106351551(LOC106351551),ncbi_106361349(LOC106361349),ncbi_106407582(LOC106407582)	MSTRG.10286(TATB),MSTRG.10454(BIP2),MSTRG.2260(PSAN),MSTRG.23167(IQD32),MSTRG.28035(--),MSTRG.28077(RPL10A),MSTRG.30958(MCD1),MSTRG.34996(RPS12A),MSTRG.41381(--),MSTRG.49916(MVP1),MSTRG.52187(BIP2),MSTRG.55374(TUBB2),MSTRG.57987(RPS2A),MSTRG.72133(DDM1),MSTRG.7772(RPL12A),MSTRG.82476(NMT1),MSTRG.83984(--),ncbi_106345844(LOC106345844),ncbi_106347994(LOC106347994),ncbi_106348687(LOC106348687),ncbi_…
GO:0005575	Cellular Component	GO:0043226	organelle	886	1000	MSTRG.11047(--),MSTRG.13220(ICL),MSTRG.16117(--),MSTRG.16377(VTI11),MSTRG.16565(TPS09),MSTRG.18461(--),MSTRG.18548(DHDPS2),MSTRG.19762(F-ATMBP),MSTRG.19763(JAL5),MSTRG.19828(PI4KA1),MSTRG.22076(PP2B15),MSTRG.22276(ICS1),MSTRG.233(NAGS2),MSTRG.25421(BGLU3),MSTRG.25558(RCF3),MSTRG.26388(SAHH2),MSTRG.27078(HOS15),MSTRG.28006(CLPB1),MSTRG.28548(JAL22),MSTRG.29117(ARAC5),MSTRG.30141(--),MSTRG.30262(OE…	MSTRG.10544(MYB101),MSTRG.11098(SPH11),MSTRG.12038(FH11),MSTRG.12429(SCL27),MSTRG.12765(CRSH),MSTRG.13032(GAD4),MSTRG.13549(PDV2),MSTRG.13947(COG4),MSTRG.15527(--),MSTRG.15847(UBA2A),MSTRG.16463(BHLH71),MSTRG.17345(SCPL26),MSTRG.18049(At2g47850),MSTRG.18613(--),MSTRG.18625(LHCB4.3),MSTRG.18719(GAUT12),MSTRG.19530(CYP97A3),MSTRG.20679(NSP1),MSTRG.20735(accB),MSTRG.2126(PORB),MSTRG.21752(SPH6),MSTR…	297	886	MSTRG.11666(At1g56220),MSTRG.13220(ICL),MSTRG.14003(At4g09580),MSTRG.14148(TPS07),MSTRG.14150(TPS07),MSTRG.16565(TPS09),MSTRG.19762(F-ATMBP),MSTRG.19763(JAL5),MSTRG.19957(TDT),MSTRG.25421(BGLU3),MSTRG.30797(RPN2),MSTRG.30828(BGLU3),MSTRG.31164(PXG1),MSTRG.31165(PXG1),MSTRG.3256(BGLU19),MSTRG.34716(SCL30A),MSTRG.35858(ABCA11),MSTRG.36629(PIP1-2),MSTRG.36630(--),MSTRG.37335(TGG2),MSTRG.46021(At5g65…	MSTRG.10286(TATB),MSTRG.10454(BIP2),MSTRG.10544(MYB101),MSTRG.11098(SPH11),MSTRG.12429(SCL27),MSTRG.13032(GAD4),MSTRG.14893(VLN4),MSTRG.15847(UBA2A),MSTRG.18049(At2g47850),MSTRG.18642(GES),MSTRG.20735(accB),MSTRG.2126(PORB),MSTRG.2260(PSAN),MSTRG.23167(IQD32),MSTRG.23898(--),MSTRG.24240(HAM1),MSTRG.24241(--),MSTRG.25150(SMC4),MSTRG.25151(SMC4),MSTRG.25598(IDD4),MSTRG.25692(FPS1),MSTRG.26139(DRP1C…
GO:0005575	Cellular Component	GO:0044420	extracellular matrix component	0	0	--	--	1	2	MSTRG.4884(OlnB1)	ncbi_106419374(LOC106419374),ncbi_106448287(LOC106448287)
GO:0005575	Cellular Component	GO:0044421	extracellular region part	2	5	ncbi_106365738(LOC106365738),ncbi_106416068(LOC106416068)	MSTRG.65902(dVPE),ncbi_106375615(LOC106375615),ncbi_106376026(LOC106376026),ncbi_106440814(LOC106440814),ncbi_106441097(LOC106441097)	0	2	--	ncbi_106401654(LOC106401654),ncbi_106440814(LOC106440814)
GO:0005575	Cellular Component	GO:0044422	organelle part	131	237	MSTRG.16117(--),MSTRG.28006(CLPB1),MSTRG.30262(OEP162),MSTRG.3256(BGLU19),MSTRG.34716(SCL30A),MSTRG.39445(OVA6),MSTRG.44327(SDH),MSTRG.46153(CER3),MSTRG.49992(VPS53),MSTRG.50681(--),MSTRG.56777(CUL1),MSTRG.61818(AIP1),MSTRG.64114(BGLU19),MSTRG.66754(HSP90-6),MSTRG.68439(At5g05200),MSTRG.72623(BGLU23),MSTRG.74607(GRF8),MSTRG.74765(Mge2),MSTRG.76228(ATR1),MSTRG.78179(GSH1),MSTRG.78602(CPN60A1),MSTR…	MSTRG.13549(PDV2),MSTRG.15527(--),MSTRG.18625(LHCB4.3),MSTRG.19530(CYP97A3),MSTRG.2126(PORB),MSTRG.21876(BCE2),MSTRG.2260(PSAN),MSTRG.23247(MAP70.5),MSTRG.2486(DXS),MSTRG.26477(At2g44050),MSTRG.30797(RPN2),MSTRG.34099(LHCA3),MSTRG.35132(ALA9),MSTRG.35743(At1g49730),MSTRG.38251(KIN14N),MSTRG.40380(DIT1),MSTRG.40849(--),MSTRG.4101(PDH-E1),MSTRG.4145(FAD2),MSTRG.4263(CAT7),MSTRG.43327(DXS),MSTRG.477…	30	262	MSTRG.30797(RPN2),MSTRG.31164(PXG1),MSTRG.31165(PXG1),MSTRG.3256(BGLU19),MSTRG.34716(SCL30A),MSTRG.36629(PIP1-2),MSTRG.36630(--),MSTRG.50681(--),MSTRG.52273(PRA1B3),MSTRG.64114(BGLU19),MSTRG.72805(--),MSTRG.78602(CPN60A1),ncbi_106351551(LOC106351551),ncbi_106356139(LOC106356139),ncbi_106365163(LOC106365163),ncbi_106384032(LOC106384032),ncbi_106407582(LOC106407582),ncbi_106409043(LOC106409043),ncb…	MSTRG.10286(TATB),MSTRG.10454(BIP2),MSTRG.2126(PORB),MSTRG.2260(PSAN),MSTRG.23167(IQD32),MSTRG.2736(PTAC10),MSTRG.28035(--),MSTRG.28077(RPL10A),MSTRG.29549(GRF9),MSTRG.30958(MCD1),MSTRG.31232(HSP70-6),MSTRG.34996(RPS12A),MSTRG.40380(DIT1),MSTRG.41381(--),MSTRG.42102(MAM1),MSTRG.43719(VPS45),MSTRG.49916(MVP1),MSTRG.49940(ASP4),MSTRG.49986(At1g53240),MSTRG.50979(At5g16150),MSTRG.50980(At5g16150),MS…
GO:0005575	Cellular Component	GO:0044423	virion part	0	1	--	MSTRG.85791(UGP2)	0	0	--	--
GO:0005575	Cellular Component	GO:0044425	membrane part	104	150	MSTRG.30262(OEP162),MSTRG.33299(CHX20),MSTRG.33300(CHX20),MSTRG.34839(CSLB3),MSTRG.38808(KCS1),MSTRG.40007(--),MSTRG.46153(CER3),MSTRG.53737(At5g36290),MSTRG.5720(KCS20),MSTRG.6156(OPT8),MSTRG.64079(NHX8),MSTRG.68542(PIP2-5),MSTRG.76065(DTX21),MSTRG.76521(ZIFL2),MSTRG.77786(CHX20),MSTRG.7783(S2),MSTRG.7784(OL2),MSTRG.78187(At4g22990),MSTRG.80328(CYP78A7),MSTRG.80528(CYTC-2),MSTRG.83743(CYP86A1),M…	MSTRG.12038(FH11),MSTRG.13549(PDV2),MSTRG.18625(LHCB4.3),MSTRG.18719(GAUT12),MSTRG.2260(PSAN),MSTRG.28086(PATL1),MSTRG.30797(RPN2),MSTRG.34099(LHCA3),MSTRG.3474(TDR),MSTRG.36914(At3g61750),MSTRG.38674(CDC48E),MSTRG.39159(At5g56590),MSTRG.40380(DIT1),MSTRG.40849(--),MSTRG.4145(FAD2),MSTRG.4263(CAT7),MSTRG.45579(ABCG25),MSTRG.46926(HVA22C),MSTRG.48546(CYP72A15),MSTRG.49016(MSD1),MSTRG.50497(OlnB1),…	67	108	MSTRG.1936(NPF5.2),MSTRG.19957(TDT),MSTRG.30797(RPN2),MSTRG.31164(PXG1),MSTRG.31165(PXG1),MSTRG.36629(PIP1-2),MSTRG.40007(--),MSTRG.4884(OlnB1),MSTRG.52273(PRA1B3),MSTRG.64079(NHX8),MSTRG.7783(S2),MSTRG.7784(OL2),MSTRG.84148(At5g10020),MSTRG.84295(TDT),ncbi_106346003(LOC106346003),ncbi_106346513(LOC106346513),ncbi_106348845(LOC106348845),ncbi_106351477(LOC106351477),ncbi_106351709(LOC106351709),n…	MSTRG.10286(TATB),MSTRG.14793(At2g25060),MSTRG.1567(CSC1),MSTRG.19898(ABCC4),MSTRG.2260(PSAN),MSTRG.40380(DIT1),MSTRG.41590(TLP1),MSTRG.45579(ABCG25),MSTRG.50497(OlnB1),MSTRG.50979(At5g16150),MSTRG.50980(At5g16150),MSTRG.58633(GSVIVT00026920001),MSTRG.6156(OPT8),MSTRG.70024(ABCG25),MSTRG.70025(ABCG25),MSTRG.74842(--),MSTRG.80560(ABCC4),MSTRG.82527(--),ncbi_106345375(LOC106345375),ncbi_106346534(L…
GO:0005575	Cellular Component	GO:0044464	cell part	1120	1300	MSTRG.10815(PI1),MSTRG.11047(--),MSTRG.13220(ICL),MSTRG.16117(--),MSTRG.16377(VTI11),MSTRG.16565(TPS09),MSTRG.17603(PI1),MSTRG.18461(--),MSTRG.18548(DHDPS2),MSTRG.19762(F-ATMBP),MSTRG.19763(JAL5),MSTRG.19828(PI4KA1),MSTRG.21863(CDKF-4),MSTRG.22076(PP2B15),MSTRG.22276(ICS1),MSTRG.233(NAGS2),MSTRG.25421(BGLU3),MSTRG.25558(RCF3),MSTRG.26388(SAHH2),MSTRG.27078(HOS15),MSTRG.28006(CLPB1),MSTRG.28548(JA…	MSTRG.10544(MYB101),MSTRG.10685(PER21),MSTRG.11098(SPH11),MSTRG.12038(FH11),MSTRG.12429(SCL27),MSTRG.12765(CRSH),MSTRG.13032(GAD4),MSTRG.13549(PDV2),MSTRG.13947(COG4),MSTRG.15477(RPL3),MSTRG.15809(ADPG2),MSTRG.15847(UBA2A),MSTRG.16007(MVD2),MSTRG.16463(BHLH71),MSTRG.17345(SCPL26),MSTRG.18049(At2g47850),MSTRG.18613(--),MSTRG.18625(LHCB4.3),MSTRG.18719(GAUT12),MSTRG.19530(CYP97A3),MSTRG.20679(NSP1)…
42),ncbi_106452180(LOC106452180),ncbi_106452182(LOC106452182),ncbi_106452233(LOC106452233),ncbi_106452495(LOC106452495),ncbi_106452619(LOC106452619),ncbi_106452629(LOC106452629),ncbi_106452677(LOC106452677),ncbi_106452702(LOC106452702),ncbi_106452709(LOC106452709),ncbi_106452802(LOC106452802),ncbi_106452930(LOC106452930),ncbi_106453118(LOC106453118),ncbi_106453172(LOC106453172),ncbi_106453174(LOC…	370	1217	MSTRG.10815(PI1),MSTRG.11666(At1g56220),MSTRG.13220(ICL),MSTRG.14003(At4g09580),MSTRG.14148(TPS07),MSTRG.14150(TPS07),MSTRG.15809(ADPG2),MSTRG.16565(TPS09),MSTRG.19762(F-ATMBP),MSTRG.19763(JAL5),MSTRG.19957(TDT),MSTRG.25421(BGLU3),MSTRG.29116(AFP2),MSTRG.30797(RPN2),MSTRG.30828(BGLU3),MSTRG.31164(PXG1),MSTRG.31165(PXG1),MSTRG.3256(BGLU19),MSTRG.34716(SCL30A),MSTRG.35858(ABCA11),MSTRG.36629(PIP1-2…	MSTRG.10286(TATB),MSTRG.10454(BIP2),MSTRG.10544(MYB101),MSTRG.10685(PER21),MSTRG.11098(SPH11),MSTRG.12429(SCL27),MSTRG.13032(GAD4),MSTRG.14893(VLN4),MSTRG.15847(UBA2A),MSTRG.18049(At2g47850),MSTRG.18642(GES),MSTRG.20735(accB),MSTRG.2126(PORB),MSTRG.2260(PSAN),MSTRG.23167(IQD32),MSTRG.23898(--),MSTRG.24240(HAM1),MSTRG.24241(--),MSTRG.25150(SMC4),MSTRG.25151(SMC4),MSTRG.25598(IDD4),MSTRG.25692(FPS1…
08(LOC111205108),ncbi_111205422(LOC111205422),ncbi_111205459(LOC111205459),ncbi_111206286(LOC111206286),ncbi_111206327(LOC111206327),ncbi_111206496(LOC111206496),ncbi_111206777(LOC111206777),ncbi_111207183(LOC111207183),ncbi_111207266(LOC111207266),ncbi_111207761(LOC111207761),ncbi_111207817(LOC111207817),ncbi_111207839(LOC111207839),ncbi_111208198(LOC111208198),ncbi_111208354(LOC111208354),ncbi_…
GO:0005575	Cellular Component	GO:0099512	supramolecular fiber	0	9	--	MSTRG.68214(BUBR1),MSTRG.68224(BUBR1),ncbi_106353865(LOC106353865),ncbi_106361879(LOC106361879),ncbi_106367359(LOC106367359),ncbi_106367435(LOC106367435),ncbi_106401933(LOC106401933),ncbi_106430658(LOC106430658),ncbi_111199790(LOC111199790)	0	1	--	MSTRG.89912(GCP2)
GO:0008150	Biological Process	GO:0000003	reproduction	90	101	MSTRG.13220(ICL),MSTRG.19762(F-ATMBP),MSTRG.28548(JAL22),MSTRG.30141(--),MSTRG.3256(BGLU19),MSTRG.39445(OVA6),MSTRG.45506(RAB28),MSTRG.46153(CER3),MSTRG.46626(JAL33),MSTRG.48731(ddx11),MSTRG.49978(ECP63),MSTRG.51977(HTH),MSTRG.56076(ICL),MSTRG.56777(CUL1),MSTRG.6156(OPT8),MSTRG.61818(AIP1),MSTRG.64114(BGLU19),MSTRG.64292(ABI5),MSTRG.6777(ASK4),MSTRG.68555(SMZ),MSTRG.72623(BGLU23),MSTRG.74029(CEL3…	MSTRG.10544(MYB101),MSTRG.11098(SPH11),MSTRG.12038(FH11),MSTRG.15809(ADPG2),MSTRG.20679(NSP1),MSTRG.3474(TDR),MSTRG.34747(HSL1),MSTRG.3475(TDR),MSTRG.39159(At5g56590),MSTRG.43679(MHK),MSTRG.44595(CPK32),MSTRG.46926(HVA22C),MSTRG.48395(GRF2),MSTRG.49016(MSD1),MSTRG.50497(OlnB1),MSTRG.54766(--),MSTRG.59785(DUF3),MSTRG.61087(YLMG1-2),MSTRG.65223(At5g27750),MSTRG.65902(dVPE),MSTRG.66230(SBT1.7),MSTRG…	60	85	MSTRG.13220(ICL),MSTRG.13327(--),MSTRG.13328(--),MSTRG.15809(ADPG2),MSTRG.19762(F-ATMBP),MSTRG.31164(PXG1),MSTRG.31165(PXG1),MSTRG.3256(BGLU19),MSTRG.35858(ABCA11),MSTRG.45506(RAB28),MSTRG.48731(ddx11),MSTRG.4884(OlnB1),MSTRG.63105(CRU4),MSTRG.63106(CRU4),MSTRG.64114(BGLU19),MSTRG.64292(ABI5),MSTRG.6777(ASK4),MSTRG.68555(SMZ),MSTRG.7783(S2),MSTRG.7784(OL2),MSTRG.78602(CPN60A1),MSTRG.80799(FH11),n…	MSTRG.10544(MYB101),MSTRG.11098(SPH11),MSTRG.25150(SMC4),MSTRG.25151(SMC4),MSTRG.26835(LKR/SDH),MSTRG.29697(ATHB-15),MSTRG.31232(HSP70-6),MSTRG.34747(HSL1),MSTRG.43679(MHK),MSTRG.44595(CPK32),MSTRG.50497(OlnB1),MSTRG.54766(--),MSTRG.56127(KIN10A),MSTRG.6156(OPT8),MSTRG.63900(At3g56120),MSTRG.66230(SBT1.7),MSTRG.72639(RGA1),MSTRG.77989(FER3),MSTRG.86033(BZIP25),MSTRG.89428(PVIP),ncbi_106345344(LOC…
GO:0008150	Biological Process	GO:0001906	cell killing	1	1	MSTRG.29116(AFP2)	MSTRG.35063(At5g46871)	1	1	MSTRG.29116(AFP2)	MSTRG.35063(At5g46871)
GO:0008150	Biological Process	GO:0002376	immune system process	15	27	MSTRG.22276(ICS1),MSTRG.3256(BGLU19),MSTRG.57872(ARF1),MSTRG.64114(BGLU19),MSTRG.65157(--),MSTRG.72623(BGLU23),MSTRG.92787(CP29B),ncbi_106348119(LOC106348119),ncbi_106372466(LOC106372466),ncbi_106396925(LOC106396925),ncbi_106411106(LOC106411106),ncbi_106420603(LOC106420603),ncbi_106431862(LOC106431862),ncbi_106435321(LOC106435321),ncbi_111201347(LOC111201347)	MSTRG.20291(DRB3),MSTRG.35743(At1g49730),MSTRG.46447(RBK1),MSTRG.67468(LOL1),MSTRG.68450(ARP4),MSTRG.71346(HDG12),MSTRG.73771(CLSY4),MSTRG.79656(CSP41B),MSTRG.91828(MES19),ncbi_106345982(LOC106345982),ncbi_106353104(LOC106353104),ncbi_106353968(LOC106353968),ncbi_106360449(LOC106360449),ncbi_106368059(LOC106368059),ncbi_106368481(LOC106368481),ncbi_106377486(LOC106377486),ncbi_106389400(LOC106389…	5	25	MSTRG.3256(BGLU19),MSTRG.64114(BGLU19),ncbi_106348119(LOC106348119),ncbi_106383209(LOC106383209),ncbi_106431862(LOC106431862)	MSTRG.2230(At4g28400),MSTRG.25150(SMC4),MSTRG.25151(SMC4),MSTRG.67468(LOL1),MSTRG.71346(HDG12),MSTRG.73771(CLSY4),MSTRG.91338(MAP2B),MSTRG.91828(MES19),ncbi_106348321(LOC106348321),ncbi_106353104(LOC106353104),ncbi_106377486(LOC106377486),ncbi_106385033(LOC106385033),ncbi_106389844(LOC106389844),ncbi_106392732(LOC106392732),ncbi_106396414(LOC106396414),ncbi_106398703(LOC106398703),ncbi_106400714(…
GO:0008150	Biological Process	GO:0008152	metabolic process	550	823	MSTRG.10815(PI1),MSTRG.13220(ICL),MSTRG.16565(TPS09),MSTRG.17603(PI1),MSTRG.18548(DHDPS2),MSTRG.19763(JAL5),MSTRG.19828(PI4KA1),MSTRG.21863(CDKF-4),MSTRG.22276(ICS1),MSTRG.233(NAGS2),MSTRG.25421(BGLU3),MSTRG.26388(SAHH2),MSTRG.27078(HOS15),MSTRG.27528(--),MSTRG.28006(CLPB1),MSTRG.28548(JAL22),MSTRG.29116(AFP2),MSTRG.29117(ARAC5),MSTRG.3256(BGLU19),MSTRG.34716(SCL30A),MSTRG.34839(CSLB3),MSTRG.3540…	MSTRG.10544(MYB101),MSTRG.10685(PER21),MSTRG.11098(SPH11),MSTRG.12221(MYBC1),MSTRG.12429(SCL27),MSTRG.12765(CRSH),MSTRG.13032(GAD4),MSTRG.13262(IP5P5),MSTRG.14753(FEY),MSTRG.15809(ADPG2),MSTRG.15847(UBA2A),MSTRG.16007(MVD2),MSTRG.16398(YUC10),MSTRG.16463(BHLH71),MSTRG.17345(SCPL26),MSTRG.18625(LHCB4.3),MSTRG.18719(GAUT12),MSTRG.19530(CYP97A3),MSTRG.20291(DRB3),MSTRG.20679(NSP1),MSTRG.2126(PORB),M…	220	711	MSTRG.10815(PI1),MSTRG.13220(ICL),MSTRG.14003(At4g09580),MSTRG.14148(TPS07),MSTRG.14150(TPS07),MSTRG.14866(SCT),MSTRG.15809(ADPG2),MSTRG.16565(TPS09),MSTRG.19763(JAL5),MSTRG.25421(BGLU3),MSTRG.29116(AFP2),MSTRG.30797(RPN2),MSTRG.30828(BGLU3),MSTRG.31164(PXG1),MSTRG.31165(PXG1),MSTRG.3256(BGLU19),MSTRG.34716(SCL30A),MSTRG.35858(ABCA11),MSTRG.36629(PIP1-2),MSTRG.36630(--),MSTRG.37335(TGG2),MSTRG.38…	MSTRG.10454(BIP2),MSTRG.10544(MYB101),MSTRG.10685(PER21),MSTRG.11098(SPH11),MSTRG.12429(SCL27),MSTRG.13032(GAD4),MSTRG.15847(UBA2A),MSTRG.16361(IBS1),MSTRG.18642(GES),MSTRG.19898(ABCC4),MSTRG.2126(PORB),MSTRG.2230(At4g28400),MSTRG.2260(PSAN),MSTRG.23167(IQD32),MSTRG.23456(--),MSTRG.24240(HAM1),MSTRG.24591(SNL5),MSTRG.25150(SMC4),MSTRG.25151(SMC4),MSTRG.25598(IDD4),MSTRG.25692(FPS1),MSTRG.26139(DR…
GO:0008150	Biological Process	GO:0009987	cellular process	581	1007	MSTRG.10815(PI1),MSTRG.13220(ICL),MSTRG.14410(abhd17c),MSTRG.16565(TPS09),MSTRG.17603(PI1),MSTRG.18548(DHDPS2),MSTRG.19763(JAL5),MSTRG.19828(PI4KA1),MSTRG.21863(CDKF-4),MSTRG.22276(ICS1),MSTRG.22615(NHX8),MSTRG.233(NAGS2),MSTRG.26388(SAHH2),MSTRG.27078(HOS15),MSTRG.27528(--),MSTRG.28006(CLPB1),MSTRG.28548(JAL22),MSTRG.29116(AFP2),MSTRG.29117(ARAC5),MSTRG.3256(BGLU19),MSTRG.33299(CHX20),MSTRG.3330…	MSTRG.10544(MYB101),MSTRG.10685(PER21),MSTRG.11098(SPH11),MSTRG.12038(FH11),MSTRG.12429(SCL27),MSTRG.12765(CRSH),MSTRG.13032(GAD4),MSTRG.13262(IP5P5),MSTRG.13549(PDV2),MSTRG.13927(PUB4),MSTRG.13947(COG4),MSTRG.15809(ADPG2),MSTRG.15847(UBA2A),MSTRG.16007(MVD2),MSTRG.16398(YUC10),MSTRG.16463(BHLH71),MSTRG.17345(SCPL26),MSTRG.18625(LHCB4.3),MSTRG.18719(GAUT12),MSTRG.19530(CYP97A3),MSTRG.20291(DRB3),…	205	980	MSTRG.10815(PI1),MSTRG.13220(ICL),MSTRG.13327(--),MSTRG.13328(--),MSTRG.14003(At4g09580),MSTRG.14148(TPS07),MSTRG.14150(TPS07),MSTRG.14866(SCT),MSTRG.15809(ADPG2),MSTRG.16565(TPS09),MSTRG.19763(JAL5),MSTRG.19957(TDT),MSTRG.29116(AFP2),MSTRG.30797(RPN2),MSTRG.31164(PXG1),MSTRG.31165(PXG1),MSTRG.3256(BGLU19),MSTRG.34716(SCL30A),MSTRG.35858(ABCA11),MSTRG.36629(PIP1-2),MSTRG.36630(--),MSTRG.37335(TGG…	MSTRG.10286(TATB),MSTRG.10454(BIP2),MSTRG.10544(MYB101),MSTRG.10685(PER21),MSTRG.11098(SPH11),MSTRG.12429(SCL27),MSTRG.13032(GAD4),MSTRG.14893(VLN4),MSTRG.15847(UBA2A),MSTRG.16361(IBS1),MSTRG.18642(GES),MSTRG.19898(ABCC4),MSTRG.20735(accB),MSTRG.2126(PORB),MSTRG.2230(At4g28400),MSTRG.2260(PSAN),MSTRG.23167(IQD32),MSTRG.24240(HAM1),MSTRG.25150(SMC4),MSTRG.25151(SMC4),MSTRG.25598(IDD4),MSTRG.25692(…
GO:0008150	Biological Process	GO:0022414	reproductive process	90	100	MSTRG.13220(ICL),MSTRG.19762(F-ATMBP),MSTRG.28548(JAL22),MSTRG.30141(--),MSTRG.3256(BGLU19),MSTRG.39445(OVA6),MSTRG.45506(RAB28),MSTRG.46153(CER3),MSTRG.46626(JAL33),MSTRG.48731(ddx11),MSTRG.49978(ECP63),MSTRG.51977(HTH),MSTRG.56076(ICL),MSTRG.56777(CUL1),MSTRG.6156(OPT8),MSTRG.61818(AIP1),MSTRG.64114(BGLU19),MSTRG.64292(ABI5),MSTRG.6777(ASK4),MSTRG.68555(SMZ),MSTRG.72623(BGLU23),MSTRG.74029(CEL3…	MSTRG.10544(MYB101),MSTRG.11098(SPH11),MSTRG.12038(FH11),MSTRG.15809(ADPG2),MSTRG.20679(NSP1),MSTRG.3474(TDR),MSTRG.34747(HSL1),MSTRG.3475(TDR),MSTRG.39159(At5g56590),MSTRG.43679(MHK),MSTRG.44595(CPK32),MSTRG.46926(HVA22C),MSTRG.48395(GRF2),MSTRG.49016(MSD1),MSTRG.54766(--),MSTRG.59785(DUF3),MSTRG.61087(YLMG1-2),MSTRG.65223(At5g27750),MSTRG.65902(dVPE),MSTRG.66230(SBT1.7),MSTRG.68214(BUBR1),MSTRG…	60	84	MSTRG.13220(ICL),MSTRG.13327(--),MSTRG.13328(--),MSTRG.15809(ADPG2),MSTRG.19762(F-ATMBP),MSTRG.31164(PXG1),MSTRG.31165(PXG1),MSTRG.3256(BGLU19),MSTRG.35858(ABCA11),MSTRG.45506(RAB28),MSTRG.48731(ddx11),MSTRG.4884(OlnB1),MSTRG.63105(CRU4),MSTRG.63106(CRU4),MSTRG.64114(BGLU19),MSTRG.64292(ABI5),MSTRG.6777(ASK4),MSTRG.68555(SMZ),MSTRG.7783(S2),MSTRG.7784(OL2),MSTRG.78602(CPN60A1),MSTRG.80799(FH11),n…	MSTRG.10544(MYB101),MSTRG.11098(SPH11),MSTRG.25150(SMC4),MSTRG.25151(SMC4),MSTRG.26835(LKR/SDH),MSTRG.29697(ATHB-15),MSTRG.31232(HSP70-6),MSTRG.34747(HSL1),MSTRG.43679(MHK),MSTRG.44595(CPK32),MSTRG.54766(--),MSTRG.56127(KIN10A),MSTRG.6156(OPT8),MSTRG.63900(At3g56120),MSTRG.66230(SBT1.7),MSTRG.72639(RGA1),MSTRG.77989(FER3),MSTRG.86033(BZIP25),MSTRG.89428(PVIP),ncbi_106345344(LOC106345344),ncbi_106…
GO:0008150	Biological Process	GO:0022610	biological adhesion	1	6	MSTRG.46626(JAL33)	MSTRG.50452(FLA17),ncbi_106355539(LOC106355539),ncbi_106366952(LOC106366952),ncbi_106388144(LOC106388144),ncbi_106390702(LOC106390702),ncbi_106445686(LOC106445686)	2	7	MSTRG.13327(--),MSTRG.13328(--)	MSTRG.29697(ATHB-15),ncbi_106355539(LOC106355539),ncbi_106366952(LOC106366952),ncbi_106388144(LOC106388144),ncbi_106390702(LOC106390702),ncbi_106391428(LOC106391428),ncbi_106437868(LOC106437868)
GO:0008150	Biological Process	GO:0023052	signaling	52	40	MSTRG.19763(JAL5),MSTRG.19828(PI4KA1),MSTRG.22276(ICS1),MSTRG.28548(JAL22),MSTRG.29116(AFP2),MSTRG.29117(ARAC5),MSTRG.3256(BGLU19),MSTRG.38852(NAC002),MSTRG.39206(ABI2),MSTRG.46626(JAL33),MSTRG.56777(CUL1),MSTRG.57872(ARF1),MSTRG.61818(AIP1),MSTRG.64114(BGLU19),MSTRG.64292(ABI5),MSTRG.6777(ASK4),MSTRG.68555(SMZ),MSTRG.71354(MBF1C),MSTRG.72623(BGLU23),MSTRG.74607(GRF8),MSTRG.76490(RPP5),MSTRG.7783…	MSTRG.10544(MYB101),MSTRG.15847(UBA2A),MSTRG.23439(RHF1A),MSTRG.26477(At2g44050),MSTRG.34747(HSL1),MSTRG.34833(MYB101),MSTRG.36271(SRS6),MSTRG.41680(At5g57670),MSTRG.46447(RBK1),MSTRG.48395(GRF2),MSTRG.53883(AFP1),MSTRG.57233(ABA2),MSTRG.58537(--),MSTRG.61855(DOR),MSTRG.65902(dVPE),MSTRG.66247(TSJT1),MSTRG.68450(ARP4),MSTRG.74761(VTC2),MSTRG.75074(XTH24),MSTRG.79656(CSP41B),MSTRG.82476(NMT1),ncbi…	25	36	MSTRG.13327(--),MSTRG.13328(--),MSTRG.19763(JAL5),MSTRG.29116(AFP2),MSTRG.31164(PXG1),MSTRG.31165(PXG1),MSTRG.3256(BGLU19),MSTRG.48616(PIF6),MSTRG.63105(CRU4),MSTRG.63106(CRU4),MSTRG.64114(BGLU19),MSTRG.64292(ABI5),MSTRG.6777(ASK4),MSTRG.68555(SMZ),MSTRG.7783(S2),MSTRG.7784(OL2),MSTRG.84867(JAL5),ncbi_106372043(LOC106372043),ncbi_106381476(LOC106381476),ncbi_106412136(LOC106412136),ncbi_106414978…	MSTRG.10544(MYB101),MSTRG.15847(UBA2A),MSTRG.18642(GES),MSTRG.34747(HSL1),MSTRG.34833(MYB101),MSTRG.53060(ARF11),MSTRG.62993(HFR1),MSTRG.72639(RGA1),MSTRG.75074(XTH24),MSTRG.75579(ARR10),MSTRG.82476(NMT1),MSTRG.85091(MYB3),MSTRG.86033(BZIP25),MSTRG.88449(SOT1),ncbi_106347397(LOC106347397),ncbi_106364559(LOC106364559),ncbi_106368544(LOC106368544),ncbi_106390237(LOC106390237),ncbi_106397501(LOC1063…
GO:0008150	Biological Process	GO:0032501	multicellular organismal process	188	223	MSTRG.28548(JAL22),MSTRG.29117(ARAC5),MSTRG.3256(BGLU19),MSTRG.38808(KCS1),MSTRG.38852(NAC002),MSTRG.39206(ABI2),MSTRG.39445(OVA6),MSTRG.44607(RH51),MSTRG.44622(NAC079),MSTRG.46153(CER3),MSTRG.46626(JAL33),MSTRG.50669(ASP3),MSTRG.51977(HTH),MSTRG.56777(CUL1),MSTRG.5720(KCS20),MSTRG.57591(AAK6),MSTRG.57872(ARF1),MSTRG.59840(TPLATE),MSTRG.60418(DOF1.3),MSTRG.61818(AIP1),MSTRG.64114(BGLU19),MSTRG.64…	MSTRG.10544(MYB101),MSTRG.11098(SPH11),MSTRG.12038(FH11),MSTRG.12429(SCL27),MSTRG.13262(IP5P5),MSTRG.15809(ADPG2),MSTRG.15847(UBA2A),MSTRG.16463(BHLH71),MSTRG.2126(PORB),MSTRG.23258(LAX2),MSTRG.23439(RHF1A),MSTRG.23898(--),MSTRG.2486(DXS),MSTRG.25598(IDD4),MSTRG.25612(IDD4),MSTRG.31362(BLH2),MSTRG.3474(TDR),MSTRG.34747(HSL1),MSTRG.3475(TDR),MSTRG.34833(MYB101),MSTRG.34883(At3g59000),MSTRG.36271(S…	87	223	MSTRG.13327(--),MSTRG.13328(--),MSTRG.15809(ADPG2),MSTRG.31164(PXG1),MSTRG.31165(PXG1),MSTRG.3256(BGLU19),MSTRG.35858(ABCA11),MSTRG.57591(AAK6),MSTRG.60418(DOF1.3),MSTRG.63105(CRU4),MSTRG.63106(CRU4),MSTRG.64114(BGLU19),MSTRG.64292(ABI5),MSTRG.6777(ASK4),MSTRG.68555(SMZ),MSTRG.72968(XCP2),MSTRG.7783(S2),MSTRG.7784(OL2),MSTRG.80799(FH11),ncbi_106346971(LOC106346971),ncbi_106347025(LOC106347025),nc…	MSTRG.10286(TATB),MSTRG.10544(MYB101),MSTRG.11098(SPH11),MSTRG.12429(SCL27),MSTRG.15847(UBA2A),MSTRG.2126(PORB),MSTRG.23898(--),MSTRG.24240(HAM1),MSTRG.25150(SMC4),MSTRG.25151(SMC4),MSTRG.25598(IDD4),MSTRG.26139(DRP1C),MSTRG.27519(GATA8),MSTRG.29549(GRF9),MSTRG.29697(ATHB-15),MSTRG.34747(HSL1),MSTRG.34833(MYB101),MSTRG.37497(--),MSTRG.38968(TULP6),MSTRG.43679(MHK),MSTRG.4974(PME51),MSTRG.49940(AS…
GO:0008150	Biological Process	GO:0032502	developmental process	246	390	MSTRG.13220(ICL),MSTRG.19762(F-ATMBP),MSTRG.28548(JAL22),MSTRG.29117(ARAC5),MSTRG.30141(--),MSTRG.3256(BGLU19),MSTRG.38808(KCS1),MSTRG.39206(ABI2),MSTRG.39445(OVA6),MSTRG.44607(RH51),MSTRG.44622(NAC079),MSTRG.45506(RAB28),MSTRG.46153(CER3),MSTRG.46626(JAL33),MSTRG.49978(ECP63),MSTRG.50669(ASP3),MSTRG.51977(HTH),MSTRG.55536(GAD2),MSTRG.56076(ICL),MSTRG.56777(CUL1),MSTRG.5720(KCS20),MSTRG.57591(AAK…	MSTRG.10544(MYB101),MSTRG.11098(SPH11),MSTRG.12038(FH11),MSTRG.12429(SCL27),MSTRG.13262(IP5P5),MSTRG.15809(ADPG2),MSTRG.15847(UBA2A),MSTRG.16398(YUC10),MSTRG.18719(GAUT12),MSTRG.20679(NSP1),MSTRG.2126(PORB),MSTRG.23258(LAX2),MSTRG.23439(RHF1A),MSTRG.23898(--),MSTRG.2486(DXS),MSTRG.25598(IDD4),MSTRG.25612(IDD4),MSTRG.28086(PATL1),MSTRG.31362(BLH2),MSTRG.3474(TDR),MSTRG.34747(HSL1),MSTRG.3475(TDR),…	125	345	MSTRG.13220(ICL),MSTRG.13327(--),MSTRG.13328(--),MSTRG.15809(ADPG2),MSTRG.19762(F-ATMBP),MSTRG.31164(PXG1),MSTRG.31165(PXG1),MSTRG.3256(BGLU19),MSTRG.35858(ABCA11),MSTRG.45506(RAB28),MSTRG.48616(PIF6),MSTRG.4884(OlnB1),MSTRG.55536(GAD2),MSTRG.57591(AAK6),MSTRG.57928(BGLU29),MSTRG.60418(DOF1.3),MSTRG.63105(CRU4),MSTRG.63106(CRU4),MSTRG.64114(BGLU19),MSTRG.64292(ABI5),MSTRG.67391(YUC10),MSTRG.6777(…	MSTRG.10286(TATB),MSTRG.10544(MYB101),MSTRG.11098(SPH11),MSTRG.12429(SCL27),MSTRG.14893(VLN4),MSTRG.15847(UBA2A),MSTRG.2126(PORB),MSTRG.23898(--),MSTRG.24240(HAM1),MSTRG.25150(SMC4),MSTRG.25151(SMC4),MSTRG.25598(IDD4),MSTRG.26139(DRP1C),MSTRG.26835(LKR/SDH),MSTRG.29549(GRF9),MSTRG.29697(ATHB-15),MSTRG.31232(HSP70-6),MSTRG.34747(HSL1),MSTRG.34833(MYB101),MSTRG.37497(--),MSTRG.38968(TULP6),MSTRG.43…
GO:0008150	Biological Process	GO:0040007	growth	16	35	MSTRG.29117(ARAC5),MSTRG.50669(ASP3),MSTRG.54705(At2g39360),MSTRG.55536(GAD2),MSTRG.57591(AAK6),MSTRG.6777(ASK4),MSTRG.81982(GAD2),MSTRG.8462(SAL4),MSTRG.85905(At4g24830),ncbi_106401291(LOC106401291),ncbi_106414551(LOC106414551),ncbi_106415723(LOC106415723),ncbi_106419503(LOC106419503),ncbi_106422044(BNAC07G08710D),ncbi_106423272(LOC106423272),ncbi_106445767(LOC106445767)	MSTRG.10544(MYB101),MSTRG.13262(IP5P5),MSTRG.23258(LAX2),MSTRG.28086(PATL1),MSTRG.34747(HSL1),MSTRG.38219(At1g75680),MSTRG.40380(DIT1),MSTRG.49940(ASP4),MSTRG.68106(At2g39360),MSTRG.69887(TUBA2),MSTRG.73154(--),MSTRG.85633(ACT2),MSTRG.90445(PERK15),ncbi_106346923(LOC106346923),ncbi_106350962(LOC106350962),ncbi_106354194(LOC106354194),ncbi_106354450(LOC106354450),ncbi_106359787(LOC106359787),ncbi_…	7	36	MSTRG.35858(ABCA11),MSTRG.54705(At2g39360),MSTRG.55536(GAD2),MSTRG.57591(AAK6),MSTRG.6777(ASK4),MSTRG.81982(GAD2),ncbi_106364373(BNAC05G23990D)	MSTRG.10544(MYB101),MSTRG.14893(VLN4),MSTRG.2630(PLP3B),MSTRG.29697(ATHB-15),MSTRG.34747(HSL1),MSTRG.40380(DIT1),MSTRG.49940(ASP4),MSTRG.75579(ARR10),ncbi_106349083(LOC106349083),ncbi_106350962(LOC106350962),ncbi_106354194(LOC106354194),ncbi_106354642(LOC106354642),ncbi_106359787(LOC106359787),ncbi_106362383(LOC106362383),ncbi_106366855(LOC106366855),ncbi_106368104(LOC106368104),ncbi_106369294(LO…
GO:0008150	Biological Process	GO:0040011	locomotion	0	6	--	MSTRG.89428(PVIP),ncbi_106357584(LOC106357584),ncbi_106367475(LOC106367475),ncbi_106401246(LOC106401246),ncbi_106407381(LOC106407381),ncbi_106451149(LOC106451149)	0	5	--	MSTRG.89428(PVIP),ncbi_106367475(LOC106367475),ncbi_106371004(LOC106371004),ncbi_106401246(LOC106401246),ncbi_106451149(LOC106451149)
GO:0008150	Biological Process	GO:0044699	single-organism process	685	1071	MSTRG.10815(PI1),MSTRG.13220(ICL),MSTRG.14410(abhd17c),MSTRG.16377(VTI11),MSTRG.16565(TPS09),MSTRG.17603(PI1),MSTRG.18548(DHDPS2),MSTRG.19762(F-ATMBP),MSTRG.19763(JAL5),MSTRG.19828(PI4KA1),MSTRG.21863(CDKF-4),MSTRG.22276(ICS1),MSTRG.22615(NHX8),MSTRG.233(NAGS2),MSTRG.26388(SAHH2),MSTRG.27078(HOS15),MSTRG.28548(JAL22),MSTRG.29116(AFP2),MSTRG.29117(ARAC5),MSTRG.3256(BGLU19),MSTRG.33299(CHX20),MSTRG…	MSTRG.10544(MYB101),MSTRG.10685(PER21),MSTRG.11098(SPH11),MSTRG.12038(FH11),MSTRG.12429(SCL27),MSTRG.12765(CRSH),MSTRG.13032(GAD4),MSTRG.13262(IP5P5),MSTRG.13947(COG4),MSTRG.14753(FEY),MSTRG.15809(ADPG2),MSTRG.15847(UBA2A),MSTRG.16007(MVD2),MSTRG.16398(YUC10),MSTRG.16463(BHLH71),MSTRG.17345(SCPL26),MSTRG.18625(LHCB4.3),MSTRG.18719(GAUT12),MSTRG.19530(CYP97A3),MSTRG.20291(DRB3),MSTRG.20679(NSP1),M…	278	1036	MSTRG.10815(PI1),MSTRG.13220(ICL),MSTRG.13327(--),MSTRG.13328(--),MSTRG.14003(At4g09580),MSTRG.14148(TPS07),MSTRG.14150(TPS07),MSTRG.14866(SCT),MSTRG.15809(ADPG2),MSTRG.16565(TPS09),MSTRG.1936(NPF5.2),MSTRG.19762(F-ATMBP),MSTRG.19763(JAL5),MSTRG.19957(TDT),MSTRG.29116(AFP2),MSTRG.30797(RPN2),MSTRG.31164(PXG1),MSTRG.31165(PXG1),MSTRG.3256(BGLU19),MSTRG.34716(SCL30A),MSTRG.35858(ABCA11),MSTRG.36629…	MSTRG.10286(TATB),MSTRG.10454(BIP2),MSTRG.10544(MYB101),MSTRG.10685(PER21),MSTRG.11098(SPH11),MSTRG.12429(SCL27),MSTRG.13032(GAD4),MSTRG.14893(VLN4),MSTRG.1567(CSC1),MSTRG.15847(UBA2A),MSTRG.18642(GES),MSTRG.19898(ABCC4),MSTRG.20735(accB),MSTRG.2126(PORB),MSTRG.2230(At4g28400),MSTRG.2260(PSAN),MSTRG.23167(IQD32),MSTRG.23456(--),MSTRG.23898(--),MSTRG.24240(HAM1),MSTRG.24241(--),MSTRG.25150(SMC4),M…
GO:0008150	Biological Process	GO:0048511	rhythmic process	13	37	MSTRG.92787(CP29B),ncbi_106352950(LOC106352950),ncbi_106357692(LOC106357692),ncbi_106361008(LOC106361008),ncbi_106361468(LOC106361468),ncbi_106370891(LOC106370891),ncbi_106386300(LOC106386300),ncbi_106388298(LOC106388298),ncbi_106406651(BNAA05G24220D),ncbi_106437919(LOC106437919),ncbi_106438732(LOC106438732),ncbi_111197989(LOC111197989),ncbi_111211014(LOC111211014)	MSTRG.36291(GATA8),MSTRG.79656(CSP41B),MSTRG.92622(WNK9),ncbi_106346563(LOC106346563),ncbi_106349476(LOC106349476),ncbi_106349478(LOC106349478),ncbi_106351046(LOC106351046),ncbi_106351676(LOC106351676),ncbi_106353645(LOC106353645),ncbi_106361388(LOC106361388),ncbi_106365987(LOC106365987),ncbi_106367843(LOC106367843),ncbi_106373476(LOC106373476),ncbi_106374210(LOC106374210),ncbi_106375283(LOC10637…	5	33	ncbi_106351676(LOC106351676),ncbi_106357692(LOC106357692),ncbi_106361008(LOC106361008),ncbi_106405159(LOC106405159),ncbi_106437919(LOC106437919)	MSTRG.27519(GATA8),MSTRG.62993(HFR1),MSTRG.92622(WNK9),ncbi_106346563(LOC106346563),ncbi_106349476(LOC106349476),ncbi_106349478(LOC106349478),ncbi_106361388(LOC106361388),ncbi_106362429(LOC106362429),ncbi_106366108(LOC106366108),ncbi_106373476(LOC106373476),ncbi_106382808(LOC106382808),ncbi_106389757(LOC106389757),ncbi_106391253(LOC106391253),ncbi_106391972(LOC106391972),ncbi_106396837(LOC1063968…
GO:0008150	Biological Process	GO:0048518	positive regulation of biological process	6	13	MSTRG.41112(--),MSTRG.55536(GAD2),MSTRG.81982(GAD2),ncbi_106396925(LOC106396925),ncbi_106420603(LOC106420603),ncbi_106438717(LOC106438717)	MSTRG.13032(GAD4),MSTRG.19530(CYP97A3),MSTRG.65223(At5g27750),MSTRG.72133(DDM1),MSTRG.79656(CSP41B),MSTRG.85791(UGP2),MSTRG.90739(FBP),MSTRG.91828(MES19),ncbi_106351818(LOC106351818),ncbi_106401570(LOC106401570),ncbi_106410977(LOC106410977),ncbi_106440661(LOC106440661),ncbi_106451195(LOC106451195)	4	17	MSTRG.55536(GAD2),MSTRG.61597(At2g29320),MSTRG.72721(4CL1),MSTRG.81982(GAD2)	MSTRG.13032(GAD4),MSTRG.72133(DDM1),MSTRG.90739(FBP),MSTRG.91828(MES19),ncbi_106371715(LOC106371715),ncbi_106376593(LOC106376593),ncbi_106385033(LOC106385033),ncbi_106386951(LOC106386951),ncbi_106386993(LOC106386993),ncbi_106397187(LOC106397187),ncbi_106401570(LOC106401570),ncbi_106425834(LOC106425834),ncbi_106434900(LOC106434900),ncbi_106437258(LOC106437258),ncbi_106440950(LOC106440950),ncbi_106…
GO:0008150	Biological Process	GO:0048519	negative regulation of biological process	19	41	MSTRG.10815(PI1),MSTRG.17603(PI1),MSTRG.27078(HOS15),MSTRG.34716(SCL30A),MSTRG.39206(ABI2),MSTRG.57872(ARF1),MSTRG.61818(AIP1),ncbi_106346646(LOC106346646),ncbi_106368964(LOC106368964),ncbi_106370125(LOC106370125),ncbi_106375055(LOC106375055),ncbi_106388678(LOC106388678),ncbi_106389590(LOC106389590),ncbi_106391984(LOC106391984),ncbi_106397784(LOC106397784),ncbi_106415045(LOC106415045),ncbi_106419…	MSTRG.20291(DRB3),MSTRG.38219(At1g75680),MSTRG.39159(At5g56590),MSTRG.43679(MHK),MSTRG.48516(LSG1-2),MSTRG.59785(DUF3),MSTRG.61728(CDT1A),MSTRG.66230(SBT1.7),MSTRG.68450(ARP4),MSTRG.72133(DDM1),MSTRG.73771(CLSY4),ncbi_106345248(LOC106345248),ncbi_106346204(LOC106346204),ncbi_106346205(LOC106346205),ncbi_106346801(LOC106346801),ncbi_106350482(LOC106350482),ncbi_106352041(LOC106352041),ncbi_1063608…	5	37	MSTRG.10815(PI1),MSTRG.34716(SCL30A),ncbi_106349790(LOC106349790),ncbi_106368795(LOC106368795),ncbi_106415360(LOC106415360)	MSTRG.14893(VLN4),MSTRG.25150(SMC4),MSTRG.25151(SMC4),MSTRG.43679(MHK),MSTRG.4974(PME51),MSTRG.56127(KIN10A),MSTRG.66230(SBT1.7),MSTRG.72133(DDM1),MSTRG.73771(CLSY4),MSTRG.83925(At5g05130),ncbi_106346204(LOC106346204),ncbi_106346205(LOC106346205),ncbi_106350482(LOC106350482),ncbi_106360831(LOC106360831),ncbi_106364559(LOC106364559),ncbi_106368104(LOC106368104),ncbi_106368353(LOC106368353),ncbi_10…
GO:0008150	Biological Process	GO:0050789	regulation of biological process	134	190	MSTRG.10815(PI1),MSTRG.14410(abhd17c),MSTRG.17603(PI1),MSTRG.19763(JAL5),MSTRG.19828(PI4KA1),MSTRG.21863(CDKF-4),MSTRG.22276(ICS1),MSTRG.27078(HOS15),MSTRG.28006(CLPB1),MSTRG.28548(JAL22),MSTRG.29116(AFP2),MSTRG.29117(ARAC5),MSTRG.3256(BGLU19),MSTRG.34716(SCL30A),MSTRG.38852(NAC002),MSTRG.39206(ABI2),MSTRG.41112(--),MSTRG.44607(RH51),MSTRG.44622(NAC079),MSTRG.46626(JAL33),MSTRG.47211(AIL1),MSTRG.…	MSTRG.10544(MYB101),MSTRG.12221(MYBC1),MSTRG.12429(SCL27),MSTRG.13032(GAD4),MSTRG.15847(UBA2A),MSTRG.16463(BHLH71),MSTRG.18625(LHCB4.3),MSTRG.19530(CYP97A3),MSTRG.20291(DRB3),MSTRG.2126(PORB),MSTRG.2260(PSAN),MSTRG.23258(LAX2),MSTRG.23439(RHF1A),MSTRG.2486(DXS),MSTRG.25598(IDD4),MSTRG.25612(IDD4),MSTRG.26477(At2g44050),MSTRG.3474(TDR),MSTRG.34747(HSL1),MSTRG.3475(TDR),MSTRG.34833(MYB101),MSTRG.36…	52	192	MSTRG.10815(PI1),MSTRG.13327(--),MSTRG.13328(--),MSTRG.19763(JAL5),MSTRG.29116(AFP2),MSTRG.31164(PXG1),MSTRG.31165(PXG1),MSTRG.3256(BGLU19),MSTRG.34716(SCL30A),MSTRG.37335(TGG2),MSTRG.47211(AIL1),MSTRG.48616(PIF6),MSTRG.48731(ddx11),MSTRG.53481(BDG3),MSTRG.54705(At2g39360),MSTRG.55536(GAD2),MSTRG.57928(BGLU29),MSTRG.60418(DOF1.3),MSTRG.61597(At2g29320),MSTRG.63105(CRU4),MSTRG.63106(CRU4),MSTRG.64…	MSTRG.10454(BIP2),MSTRG.10544(MYB101),MSTRG.12429(SCL27),MSTRG.13032(GAD4),MSTRG.14893(VLN4),MSTRG.15847(UBA2A),MSTRG.18642(GES),MSTRG.2126(PORB),MSTRG.2260(PSAN),MSTRG.24240(HAM1),MSTRG.25150(SMC4),MSTRG.25151(SMC4),MSTRG.25598(IDD4),MSTRG.2736(PTAC10),MSTRG.27519(GATA8),MSTRG.28035(--),MSTRG.29697(ATHB-15),MSTRG.34747(HSL1),MSTRG.34833(MYB101),MSTRG.38968(TULP6),MSTRG.43679(MHK),MSTRG.43719(VPS…
GO:0008150	Biological Process	GO:0050896	response to stimulus	369	339	MSTRG.10815(PI1),MSTRG.16475(--),MSTRG.17603(PI1),MSTRG.19762(F-ATMBP),MSTRG.19763(JAL5),MSTRG.19828(PI4KA1),MSTRG.22276(ICS1),MSTRG.25421(BGLU3),MSTRG.25558(RCF3),MSTRG.26388(SAHH2),MSTRG.27078(HOS15),MSTRG.28006(CLPB1),MSTRG.28548(JAL22),MSTRG.29116(AFP2),MSTRG.29117(ARAC5),MSTRG.32007(--),MSTRG.3256(BGLU19),MSTRG.34716(SCL30A),MSTRG.36353(GLC1),MSTRG.37722(RBP45B),MSTRG.38808(KCS1),MSTRG.38811…	MSTRG.10544(MYB101),MSTRG.10685(PER21),MSTRG.11098(SPH11),MSTRG.12020(LCR18),MSTRG.1214(ATTI7),MSTRG.1215(ATTI1),MSTRG.12429(SCL27),MSTRG.13032(GAD4),MSTRG.13927(PUB4),MSTRG.15847(UBA2A),MSTRG.18625(LHCB4.3),MSTRG.18719(GAUT12),MSTRG.20291(DRB3),MSTRG.20679(NSP1),MSTRG.2126(PORB),MSTRG.21876(BCE2),MSTRG.23247(MAP70.5),MSTRG.23258(LAX2),MSTRG.23439(RHF1A),MSTRG.23456(--),MSTRG.23783(--),MSTRG.2486…	149	295	MSTRG.10815(PI1),MSTRG.11666(At1g56220),MSTRG.13327(--),MSTRG.13328(--),MSTRG.14866(SCT),MSTRG.1936(NPF5.2),MSTRG.19762(F-ATMBP),MSTRG.19763(JAL5),MSTRG.25421(BGLU3),MSTRG.29116(AFP2),MSTRG.30797(RPN2),MSTRG.30828(BGLU3),MSTRG.31164(PXG1),MSTRG.31165(PXG1),MSTRG.3256(BGLU19),MSTRG.34716(SCL30A),MSTRG.35858(ABCA11),MSTRG.36629(PIP1-2),MSTRG.37335(TGG2),MSTRG.48219(--),MSTRG.48616(PIF6),MSTRG.48731…	MSTRG.10454(BIP2),MSTRG.10544(MYB101),MSTRG.10685(PER21),MSTRG.11098(SPH11),MSTRG.12020(LCR18),MSTRG.12429(SCL27),MSTRG.13032(GAD4),MSTRG.14893(VLN4),MSTRG.15847(UBA2A),MSTRG.18642(GES),MSTRG.2126(PORB),MSTRG.2230(At4g28400),MSTRG.23167(IQD32),MSTRG.23456(--),MSTRG.24240(HAM1),MSTRG.24241(--),MSTRG.25150(SMC4),MSTRG.25151(SMC4),MSTRG.25692(FPS1),MSTRG.25796(GLC1),MSTRG.26835(LKR/SDH),MSTRG.28077(…
GO:0008150	Biological Process	GO:0051179	localization	202	279	MSTRG.10815(PI1),MSTRG.16377(VTI11),MSTRG.17603(PI1),MSTRG.22276(ICS1),MSTRG.22615(NHX8),MSTRG.26388(SAHH2),MSTRG.28548(JAL22),MSTRG.30262(OEP162),MSTRG.3256(BGLU19),MSTRG.33299(CHX20),MSTRG.33300(CHX20),MSTRG.39206(ABI2),MSTRG.41112(--),MSTRG.41535(--),MSTRG.46626(JAL33),MSTRG.49992(VPS53),MSTRG.53737(At5g36290),MSTRG.54705(At2g39360),MSTRG.55536(GAD2),MSTRG.56777(CUL1),MSTRG.57872(ARF1),MSTRG.5…	MSTRG.10685(PER21),MSTRG.13032(GAD4),MSTRG.13034(NPF8.4),MSTRG.13947(COG4),MSTRG.18625(LHCB4.3),MSTRG.18718(IAN9),MSTRG.20679(NSP1),MSTRG.20735(accB),MSTRG.21752(SPH6),MSTRG.23247(MAP70.5),MSTRG.23258(LAX2),MSTRG.23319(MRS2-1),MSTRG.23467(MRS2-1),MSTRG.2486(DXS),MSTRG.24972(At4g26390),MSTRG.28086(PATL1),MSTRG.29870(At4g26390),MSTRG.34747(HSL1),MSTRG.35132(ALA9),MSTRG.38674(CDC48E),MSTRG.39854(--)…	79	275	MSTRG.10815(PI1),MSTRG.11666(At1g56220),MSTRG.13327(--),MSTRG.13328(--),MSTRG.1936(NPF5.2),MSTRG.19957(TDT),MSTRG.31164(PXG1),MSTRG.31165(PXG1),MSTRG.3256(BGLU19),MSTRG.36629(PIP1-2),MSTRG.41535(--),MSTRG.4884(OlnB1),MSTRG.52273(PRA1B3),MSTRG.53685(At1g56220),MSTRG.54705(At2g39360),MSTRG.55536(GAD2),MSTRG.61597(At2g29320),MSTRG.63105(CRU4),MSTRG.63106(CRU4),MSTRG.64079(NHX8),MSTRG.64114(BGLU19),M…	MSTRG.10286(TATB),MSTRG.10685(PER21),MSTRG.13032(GAD4),MSTRG.14893(VLN4),MSTRG.1567(CSC1),MSTRG.19898(ABCC4),MSTRG.20735(accB),MSTRG.25692(FPS1),MSTRG.29549(GRF9),MSTRG.31232(HSP70-6),MSTRG.34747(HSL1),MSTRG.34996(RPS12A),MSTRG.37497(--),MSTRG.40380(DIT1),MSTRG.43719(VPS45),MSTRG.45579(ABCG25),MSTRG.49916(MVP1),MSTRG.49986(At1g53240),MSTRG.50497(OlnB1),MSTRG.50979(At5g16150),MSTRG.50980(At5g16150…
GO:0008150	Biological Process	GO:0051704	multi-organism process	155	94	MSTRG.10815(PI1),MSTRG.17603(PI1),MSTRG.22276(ICS1),MSTRG.25421(BGLU3),MSTRG.29116(AFP2),MSTRG.3256(BGLU19),MSTRG.38811(--),MSTRG.38852(NAC002),MSTRG.39206(ABI2),MSTRG.54749(At2g14710),MSTRG.62963(--),MSTRG.64114(BGLU19),MSTRG.65157(--),MSTRG.6777(ASK4),MSTRG.72623(BGLU23),MSTRG.74029(CEL3),MSTRG.76065(DTX21),MSTRG.76339(BAM5),MSTRG.76490(RPP5),MSTRG.76521(ZIFL2),MSTRG.78179(GSH1),MSTRG.92150(IAA…	MSTRG.10685(PER21),MSTRG.12020(LCR18),MSTRG.1214(ATTI7),MSTRG.1215(ATTI1),MSTRG.20679(NSP1),MSTRG.23258(LAX2),MSTRG.23439(RHF1A),MSTRG.35063(At5g46871),MSTRG.35743(At1g49730),MSTRG.40380(DIT1),MSTRG.4263(CAT7),MSTRG.46447(RBK1),MSTRG.46926(HVA22C),MSTRG.48341(LCR53),MSTRG.49016(MSD1),MSTRG.49916(MVP1),MSTRG.53483(At4g30570),MSTRG.53883(AFP1),MSTRG.53893(LCR18),MSTRG.56792(VPS45),MSTRG.58537(--),M…	46	119	MSTRG.10815(PI1),MSTRG.13327(--),MSTRG.13328(--),MSTRG.1936(NPF5.2),MSTRG.25421(BGLU3),MSTRG.29116(AFP2),MSTRG.30828(BGLU3),MSTRG.3256(BGLU19),MSTRG.37335(TGG2),MSTRG.57928(BGLU29),MSTRG.64114(BGLU19),MSTRG.6777(ASK4),MSTRG.72721(4CL1),MSTRG.82937(DSC2),MSTRG.90021(PME3),ncbi_106350671(LOC106350671),ncbi_106350809(LOC106350809),ncbi_106351453(LOC106351453),ncbi_106351474(LOC106351474),ncbi_106353…	MSTRG.10685(PER21),MSTRG.12020(LCR18),MSTRG.18642(GES),MSTRG.2230(At4g28400),MSTRG.31232(HSP70-6),MSTRG.35063(At5g46871),MSTRG.40380(DIT1),MSTRG.42102(MAM1),MSTRG.43719(VPS45),MSTRG.49916(MVP1),MSTRG.49986(At1g53240),MSTRG.56792(VPS45),MSTRG.60884(RF45),MSTRG.71207(At1g13609),MSTRG.71346(HDG12),MSTRG.72133(DDM1),MSTRG.75781(At1g13609),MSTRG.76339(BAM5),MSTRG.7772(RPL12A),MSTRG.86033(BZIP25),MSTRG…
GO:0008150	Biological Process	GO:0065007	biological regulation	189	323	MSTRG.10815(PI1),MSTRG.14410(abhd17c),MSTRG.17603(PI1),MSTRG.19763(JAL5),MSTRG.19828(PI4KA1),MSTRG.21863(CDKF-4),MSTRG.22276(ICS1),MSTRG.27078(HOS15),MSTRG.28006(CLPB1),MSTRG.28548(JAL22),MSTRG.29116(AFP2),MSTRG.29117(ARAC5),MSTRG.3256(BGLU19),MSTRG.33299(CHX20),MSTRG.33300(CHX20),MSTRG.34716(SCL30A),MSTRG.38852(NAC002),MSTRG.39206(ABI2),MSTRG.41112(--),MSTRG.44607(RH51),MSTRG.44622(NAC079),MSTRG…	MSTRG.10544(MYB101),MSTRG.12221(MYBC1),MSTRG.12429(SCL27),MSTRG.13032(GAD4),MSTRG.15847(UBA2A),MSTRG.16398(YUC10),MSTRG.16463(BHLH71),MSTRG.18625(LHCB4.3),MSTRG.19530(CYP97A3),MSTRG.20291(DRB3),MSTRG.20735(accB),MSTRG.2126(PORB),MSTRG.2260(PSAN),MSTRG.23258(LAX2),MSTRG.23439(RHF1A),MSTRG.2486(DXS),MSTRG.25598(IDD4),MSTRG.25612(IDD4),MSTRG.26477(At2g44050),MSTRG.3474(TDR),MSTRG.34747(HSL1),MSTRG.3…	72	313	MSTRG.10815(PI1),MSTRG.13327(--),MSTRG.13328(--),MSTRG.19763(JAL5),MSTRG.19957(TDT),MSTRG.29116(AFP2),MSTRG.31164(PXG1),MSTRG.31165(PXG1),MSTRG.3256(BGLU19),MSTRG.34716(SCL30A),MSTRG.35858(ABCA11),MSTRG.37335(TGG2),MSTRG.47211(AIL1),MSTRG.48616(PIF6),MSTRG.48731(ddx11),MSTRG.4884(OlnB1),MSTRG.53481(BDG3),MSTRG.54705(At2g39360),MSTRG.54721(SCPL16),MSTRG.55536(GAD2),MSTRG.57928(BGLU29),MSTRG.60418(…	MSTRG.10454(BIP2),MSTRG.10544(MYB101),MSTRG.12429(SCL27),MSTRG.13032(GAD4),MSTRG.14893(VLN4),MSTRG.15847(UBA2A),MSTRG.18642(GES),MSTRG.20735(accB),MSTRG.2126(PORB),MSTRG.2230(At4g28400),MSTRG.2260(PSAN),MSTRG.24240(HAM1),MSTRG.25150(SMC4),MSTRG.25151(SMC4),MSTRG.25598(IDD4),MSTRG.25692(FPS1),MSTRG.2736(PTAC10),MSTRG.27519(GATA8),MSTRG.28035(--),MSTRG.29697(ATHB-15),MSTRG.34747(HSL1),MSTRG.34833(M…
GO:0008150	Biological Process	GO:0071840	cellular component organization or biogenesis	119	295	MSTRG.16565(TPS09),MSTRG.22276(ICS1),MSTRG.26388(SAHH2),MSTRG.27078(HOS15),MSTRG.28548(JAL22),MSTRG.29117(ARAC5),MSTRG.3256(BGLU19),MSTRG.34839(CSLB3),MSTRG.39360(LAC16),MSTRG.39445(OVA6),MSTRG.44024(XTH11),MSTRG.44607(RH51),MSTRG.46626(JAL33),MSTRG.47278(MYB54),MSTRG.48731(ddx11),MSTRG.49992(VPS53),MSTRG.50669(ASP3),MSTRG.54705(At2g39360),MSTRG.56777(CUL1),MSTRG.57872(ARF1),MSTRG.61818(AIP1),MST…	MSTRG.12038(FH11),MSTRG.12429(SCL27),MSTRG.13262(IP5P5),MSTRG.13549(PDV2),MSTRG.13927(PUB4),MSTRG.13947(COG4),MSTRG.15809(ADPG2),MSTRG.17345(SCPL26),MSTRG.18719(GAUT12),MSTRG.20679(NSP1),MSTRG.24972(At4g26390),MSTRG.25598(IDD4),MSTRG.25612(IDD4),MSTRG.28086(PATL1),MSTRG.29870(At4g26390),MSTRG.34747(HSL1),MSTRG.38219(At1g75680),MSTRG.39159(At5g56590),MSTRG.40380(DIT1),MSTRG.40849(--),MSTRG.43679(M…	51	298	MSTRG.13327(--),MSTRG.13328(--),MSTRG.15809(ADPG2),MSTRG.16565(TPS09),MSTRG.31164(PXG1),MSTRG.31165(PXG1),MSTRG.3256(BGLU19),MSTRG.35858(ABCA11),MSTRG.36629(PIP1-2),MSTRG.36630(--),MSTRG.48731(ddx11),MSTRG.4884(OlnB1),MSTRG.54705(At2g39360),MSTRG.57928(BGLU29),MSTRG.64114(BGLU19),MSTRG.6777(ASK4),MSTRG.68555(SMZ),MSTRG.77539(XTH25),MSTRG.7783(S2),MSTRG.7784(OL2),MSTRG.78602(CPN60A1),MSTRG.84148(A…	MSTRG.10286(TATB),MSTRG.10454(BIP2),MSTRG.12429(SCL27),MSTRG.14893(VLN4),MSTRG.24240(HAM1),MSTRG.25150(SMC4),MSTRG.25151(SMC4),MSTRG.25598(IDD4),MSTRG.25692(FPS1),MSTRG.26139(DRP1C),MSTRG.2630(PLP3B),MSTRG.28552(XYL1),MSTRG.29549(GRF9),MSTRG.29697(ATHB-15),MSTRG.30958(MCD1),MSTRG.31232(HSP70-6),MSTRG.34747(HSL1),MSTRG.40380(DIT1),MSTRG.41381(--),MSTRG.43679(MHK),MSTRG.43719(VPS45),MSTRG.44595(CPK…
GO:0008150	Biological Process	GO:0098754	detoxification	0	2	--	MSTRG.59845(HMA5),MSTRG.67468(LOL1)	0	1	--	MSTRG.67468(LOL1)
