# Supplementary material for: Effects of Low Nighttime Temperature on Fatty Acid Content in Developing Seeds from Brassica napus L. Based on RNA-Seq and Metabolome
Source: Plants (Basel). 2023 Jan 10;12(2):325. doi: 10.3390/plants12020325 (PMC9862530; doi:10.3390/plants12020325)
Supplement: Supplementary file 1 [file plants-12-00325-s001.zip › Table S9.xls]

Table S9 GO functional annotation on SSE13vs.SFE13vs.STE13.
GO ID (level1)	GO Term (level1)	GO ID (level2)	GO Term (level2)	Gene Number(SFE13-vs-STE13_up)	Gene Number(SFE13-vs-STE13_down)	Gene List(SFE13-vs-STE13_up)	Gene List(SFE13-vs-STE13_down)	Gene Number(SSE13-vs-SFE13_up)	Gene Number(SSE13-vs-SFE13_down)	Gene List(SSE13-vs-SFE13_up)	Gene List(SSE13-vs-SFE13_down)
GO:0003674	Molecular Function	GO:0000988	transcription factor activity, protein binding	0	0	--	--	0	1	--	MSTRG.62993(HFR1)
GO:0003674	Molecular Function	GO:0001071	nucleic acid binding transcription factor activity	1	2	MSTRG.68555(SMZ)	MSTRG.25598(IDD4),MSTRG.71346(HDG12)	11	14	MSTRG.16463(BHLH71),MSTRG.16959(IAA13),MSTRG.38852(NAC002),MSTRG.47211(AIL1),MSTRG.47278(MYB54),MSTRG.48616(PIF6),MSTRG.5630(NAC089),MSTRG.60418(DOF1.3),MSTRG.68555(SMZ),MSTRG.84652(NAC086),MSTRG.9721(PHL12)	MSTRG.25598(IDD4),MSTRG.31362(BLH2),MSTRG.41311(MYB4),MSTRG.53060(ARF11),MSTRG.55436(NAC062),MSTRG.62993(HFR1),MSTRG.68446(IDD5),MSTRG.69111(GT-2),MSTRG.69191(EIL3),MSTRG.71346(HDG12),MSTRG.76394(WRKY25),MSTRG.85091(MYB3),ncbi_106349371(LOC106349371),ncbi_106425775(LOC106425775)
GO:0003674	Molecular Function	GO:0003824	catalytic activity	55	143	MSTRG.10448(GSTF10),MSTRG.10815(PI1),MSTRG.13220(ICL),MSTRG.16565(TPS09),MSTRG.26419(ufaA1),MSTRG.3256(BGLU19),MSTRG.39445(OVA6),MSTRG.46021(At5g65490),MSTRG.46153(CER3),MSTRG.50681(--),MSTRG.53481(BDG3),MSTRG.54705(At2g39360),MSTRG.56652(GIP),MSTRG.60114(SSL9),MSTRG.62359(At3g50280),MSTRG.64114(BGLU19),MSTRG.65468(GLN1-5),MSTRG.6777(ASK4),MSTRG.77438(BSMT1),MSTRG.77539(XTH25),MSTRG.91966(XLT2),n…	MSTRG.10685(PER21),MSTRG.13032(GAD4),MSTRG.19898(ABCC4),MSTRG.2126(PORB),MSTRG.2486(DXS),MSTRG.25796(GLC1),MSTRG.27290(PYRE-F),MSTRG.28552(XYL1),MSTRG.3474(TDR),MSTRG.43327(DXS),MSTRG.45579(ABCG25),MSTRG.49221(TT10),MSTRG.49925(GLIP3),MSTRG.50748(GH3.15),MSTRG.5123(GH3.15),MSTRG.53483(At4g30570),MSTRG.53617(XTH9),MSTRG.55374(TUBB2),MSTRG.56085(ADO2),MSTRG.58633(GSVIVT00026920001),MSTRG.5951(CKX3)…	278	840	MSTRG.10815(PI1),MSTRG.13151(GK-2),MSTRG.13220(ICL),MSTRG.13677(PUB51),MSTRG.13940(XCP2),MSTRG.14150(TPS07),MSTRG.14866(SCT),MSTRG.15809(ADPG2),MSTRG.16565(TPS09),MSTRG.16675(MIPS),MSTRG.17345(SCPL26),MSTRG.1864(SRG1),MSTRG.25421(BGLU3),MSTRG.26050(HST),MSTRG.26419(ufaA1),MSTRG.26564(OBAP2C),MSTRG.3073(GLP8),MSTRG.30797(RPN2),MSTRG.30828(BGLU3),MSTRG.30967(At4g31860),MSTRG.31164(PXG1),MSTRG.31165…	MSTRG.10454(BIP2),MSTRG.10685(PER21),MSTRG.12266(UBP13),MSTRG.12525(HDA15),MSTRG.13032(GAD4),MSTRG.13033(GAD4),MSTRG.13975(ABCB21),MSTRG.16361(IBS1),MSTRG.18640(ULP1D),MSTRG.19700(RHM2),MSTRG.19898(ABCC4),MSTRG.20841(CYP72A13),MSTRG.20976(N6amt1),MSTRG.2126(PORB),MSTRG.21630(MVP1),MSTRG.21647(CSLE1),MSTRG.2230(At4g28400),MSTRG.22991(DRP1C),MSTRG.23088(PUB27),MSTRG.23172(At1g19940),MSTRG.23178(At1…
GO:0003674	Molecular Function	GO:0004871	signal transducer activity	0	3	--	MSTRG.56085(ADO2),ncbi_106368320(LOC106368320),ncbi_106428480(LOC106428480)	2	7	MSTRG.56085(ADO2),ncbi_106431123(LOC106431123)	MSTRG.57457(ERS1),MSTRG.76798(SUMM2),MSTRG.90161(MEKK1),ncbi_106353622(LOC106353622),ncbi_106355951(LOC106355951),ncbi_106411078(LOC106411078),ncbi_106440806(LOC106440806)
GO:0003674	Molecular Function	GO:0005198	structural molecule activity	0	2	--	MSTRG.55374(TUBB2),MSTRG.69887(TUBA2)	6	14	MSTRG.36629(PIP1-2),MSTRG.36630(--),MSTRG.70531(SRK2C),ncbi_106395176(LOC106395176),ncbi_106439857(LOC106439857),ncbi_111215572(LOC111215572)	MSTRG.10614(RPL18AB),MSTRG.16089(RPS14A),MSTRG.28077(RPL10A),MSTRG.51433(ACT12),MSTRG.52424(RPL18AB),MSTRG.54232(RPS10),MSTRG.55374(TUBB2),MSTRG.57987(RPS2A),MSTRG.72369(ARP2),MSTRG.7474(RPS23B),MSTRG.7772(RPL12A),ncbi_106357693(LOC106357693),ncbi_106358238(LOC106358238),ncbi_106439764(LOC106439764)
GO:0003674	Molecular Function	GO:0005215	transporter activity	6	16	MSTRG.13328(--),MSTRG.40007(--),MSTRG.64079(NHX8),ncbi_106360260(LOC106360260),ncbi_106400489(LOC106400489),ncbi_106421302(LOC106421302)	MSTRG.19898(ABCC4),MSTRG.23258(LAX2),MSTRG.45579(ABCG25),MSTRG.70024(ABCG25),MSTRG.70025(ABCG25),MSTRG.82519(AHA3),ncbi_106347489(LOC106347489),ncbi_106348621(LOC106348621),ncbi_106348623(LOC106348623),ncbi_106352625(LOC106352625),ncbi_106380434(LOC106380434),ncbi_106389868(LOC106389868),ncbi_106396451(LOC106396451),ncbi_106406602(LOC106406602),ncbi_106429352(LOC106429352),ncbi_106450814(LOC10645…	42	60	MSTRG.13327(--),MSTRG.13328(--),MSTRG.19957(TDT),MSTRG.24250(SUC1),MSTRG.30262(OEP162),MSTRG.36629(PIP1-2),MSTRG.38674(CDC48E),MSTRG.39913(DTX25),MSTRG.46426(YSL3),MSTRG.46728(At1g06360),MSTRG.54957(ABCG5),MSTRG.57458(NDT1),MSTRG.58287(At2g37460),MSTRG.65072(GAMMA-ADR),MSTRG.76521(ZIFL2),MSTRG.82230(MRS2-1),MSTRG.84295(TDT),ncbi_106361842(LOC106361842),ncbi_106362660(LOC106362660),ncbi_106365948(…	MSTRG.1567(CSC1),MSTRG.19898(ABCC4),MSTRG.23258(LAX2),MSTRG.3764(At3g14410),MSTRG.39237(AHA3),MSTRG.40380(DIT1),MSTRG.42277(KAT2),MSTRG.43719(VPS45),MSTRG.50557(At5g08680),MSTRG.50979(At5g16150),MSTRG.50980(At5g16150),MSTRG.54035(DTX43),MSTRG.56792(VPS45),MSTRG.59845(HMA5),MSTRG.60279(VHA-B1),MSTRG.6156(OPT8),MSTRG.62846(ABCB4),MSTRG.66041(STP4),MSTRG.68639(ACA11),MSTRG.73801(KAB1),MSTRG.80560(AB…
GO:0003674	Molecular Function	GO:0005488	binding	142	362	MSTRG.10448(GSTF10),MSTRG.13328(--),MSTRG.19763(JAL5),MSTRG.3256(BGLU19),MSTRG.39445(OVA6),MSTRG.46021(At5g65490),MSTRG.46153(CER3),MSTRG.48989(--),MSTRG.59475(scw1),MSTRG.64114(BGLU19),MSTRG.64292(ABI5),MSTRG.6777(ASK4),MSTRG.68542(PIP2-5),MSTRG.68555(SMZ),MSTRG.84867(JAL5),MSTRG.92787(CP29B),ncbi_106345359(LOC106345359),ncbi_106346354(LOC106346354),ncbi_106349053(LOC106349053),ncbi_106349190(LO…	MSTRG.10685(PER21),MSTRG.11098(SPH11),MSTRG.12221(MYBC1),MSTRG.13032(GAD4),MSTRG.19898(ABCC4),MSTRG.2486(DXS),MSTRG.25598(IDD4),MSTRG.28552(XYL1),MSTRG.33002(--),MSTRG.3474(TDR),MSTRG.43327(DXS),MSTRG.45579(ABCG25),MSTRG.50497(OlnB1),MSTRG.53003(ZPR1),MSTRG.53483(At4g30570),MSTRG.53967(NUP98B),MSTRG.55374(TUBB2),MSTRG.56085(ADO2),MSTRG.5951(CKX3),MSTRG.66247(TSJT1),MSTRG.69887(TUBA2),MSTRG.70024(…	602	1868	MSTRG.10530(--),MSTRG.13151(GK-2),MSTRG.13327(--),MSTRG.13328(--),MSTRG.15341(MAP70.1),MSTRG.15891(WLIM2B),MSTRG.16463(BHLH71),MSTRG.16675(MIPS),MSTRG.16959(IAA13),MSTRG.1864(SRG1),MSTRG.19763(JAL5),MSTRG.2049(FIM1),MSTRG.26050(HST),MSTRG.26564(OBAP2C),MSTRG.29207(CP33),MSTRG.29494(CP33),MSTRG.3073(GLP8),MSTRG.31164(PXG1),MSTRG.31165(PXG1),MSTRG.3256(BGLU19),MSTRG.34025(SAP4),MSTRG.39445(OVA6),MS…	MSTRG.10454(BIP2),MSTRG.10685(PER21),MSTRG.11098(SPH11),MSTRG.1133(At4g18593),MSTRG.12221(MYBC1),MSTRG.13032(GAD4),MSTRG.13033(GAD4),MSTRG.13109(CCT1),MSTRG.13348(SMC1),MSTRG.14793(At2g25060),MSTRG.14893(VLN4),MSTRG.16089(RPS14A),MSTRG.16361(IBS1),MSTRG.16545(RLM1B),MSTRG.16750(PAB4),MSTRG.19700(RHM2),MSTRG.19898(ABCC4),MSTRG.20841(CYP72A13),MSTRG.21033(WRKY2),MSTRG.21856(HAT),MSTRG.21872(TGD4),M…
5595),ncbi_106415707(LOC106415707),ncbi_106415756(LOC106415756),ncbi_106415829(LOC106415829),ncbi_106415942(LOC106415942),ncbi_106415996(LOC106415996),ncbi_106416035(LOC106416035),ncbi_106416138(LOC106416138),ncbi_106416303(LOC106416303),ncbi_106416310(LOC106416310),ncbi_106416459(LOC106416459),ncbi_106417011(LOC106417011),ncbi_106417079(LOC106417079),ncbi_106417089(LOC106417089),ncbi_106417134(L…
GO:0003674	Molecular Function	GO:0016209	antioxidant activity	1	1	MSTRG.10448(GSTF10)	MSTRG.10685(PER21)	0	2	--	MSTRG.10685(PER21),MSTRG.78687(GPX1)
GO:0003674	Molecular Function	GO:0060089	molecular transducer activity	1	4	ncbi_111200464(LOC111200464)	MSTRG.56085(ADO2),ncbi_106358362(LOC106358362),ncbi_106368320(LOC106368320),ncbi_106428480(LOC106428480)	11	11	MSTRG.56085(ADO2),ncbi_106385330(LOC106385330),ncbi_106388090(LOC106388090),ncbi_106402092(LOC106402092),ncbi_106423014(LOC106423014),ncbi_106425695(LOC106425695),ncbi_106425710(LOC106425710),ncbi_106428184(LOC106428184),ncbi_106431123(LOC106431123),ncbi_106431209(LOC106431209),ncbi_106443216(LOC106443216)	ncbi_106353622(LOC106353622),ncbi_106355951(LOC106355951),ncbi_106358362(LOC106358362),ncbi_106376493(LOC106376493),ncbi_106394399(LOC106394399),ncbi_106408995(LOC106408995),ncbi_106411078(LOC106411078),ncbi_106420273(LOC106420273),ncbi_106439441(LOC106439441),ncbi_106440806(LOC106440806),ncbi_111214165(LOC111214165)
GO:0003674	Molecular Function	GO:0098772	molecular function regulator	2	2	MSTRG.10815(PI1),ncbi_111215388(LOC111215388)	ncbi_106358590(LOC106358590),ncbi_106423941(LOC106423941)	12	16	MSTRG.10815(PI1),MSTRG.43360(CYS4),MSTRG.60535(SC35),ncbi_106356341(LOC106356341),ncbi_106358590(LOC106358590),ncbi_106392423(LOC106392423),ncbi_106394617(LOC106394617),ncbi_106394983(LOC106394983),ncbi_106396330(LOC106396330),ncbi_106423941(LOC106423941),ncbi_106423943(LOC106423943),ncbi_111215388(LOC111215388)	MSTRG.36374(ROPGEF6),MSTRG.73887(CYCB2-3),MSTRG.74047(ARF1),MSTRG.85280(GLB1),ncbi_106354203(LOC106354203),ncbi_106354272(LOC106354272),ncbi_106354274(LOC106354274),ncbi_106391830(LOC106391830),ncbi_106391835(LOC106391835),ncbi_106394586(LOC106394586),ncbi_106400441(LOC106400441),ncbi_106402741(LOC106402741),ncbi_106406661(LOC106406661),ncbi_106406678(LOC106406678),ncbi_106416764(LOC106416764),nc…
GO:0005575	Cellular Component	GO:0005576	extracellular region	2	8	MSTRG.10448(GSTF10),MSTRG.77539(XTH25)	MSTRG.28552(XYL1),MSTRG.49221(TT10),MSTRG.49925(GLIP3),MSTRG.53617(XTH9),MSTRG.75074(XTH24),MSTRG.76570(HSP90-7),MSTRG.90739(FBP),ncbi_106429522(LOC106429522)	7	27	MSTRG.30059(SKS1),MSTRG.3073(GLP8),MSTRG.60257(At1g29670),MSTRG.77539(XTH25),MSTRG.78602(CPN60A1),ncbi_106359958(LOC106359958),ncbi_106385666(LOC106385666)	MSTRG.21630(MVP1),MSTRG.25371(At3g26430),MSTRG.28086(PATL1),MSTRG.28552(XYL1),MSTRG.29604(GGAT1),MSTRG.41204(HSP70-2),MSTRG.4218(XTH9),MSTRG.42335(XTH29),MSTRG.49221(TT10),MSTRG.49916(MVP1),MSTRG.65902(dVPE),MSTRG.66230(SBT1.7),MSTRG.70781(dVPE),MSTRG.73406(SBT1.7),MSTRG.74842(--),MSTRG.75074(XTH24),MSTRG.89448(ANNAT7),MSTRG.90739(FBP),ncbi_106376026(LOC106376026),ncbi_106390494(LOC106390494),ncb…
GO:0005575	Cellular Component	GO:0005623	cell	166	367	MSTRG.10448(GSTF10),MSTRG.10815(PI1),MSTRG.13220(ICL),MSTRG.16565(TPS09),MSTRG.19762(F-ATMBP),MSTRG.19763(JAL5),MSTRG.29116(AFP2),MSTRG.30141(--),MSTRG.3256(BGLU19),MSTRG.39445(OVA6),MSTRG.45506(RAB28),MSTRG.46021(At5g65490),MSTRG.46153(CER3),MSTRG.48219(--),MSTRG.50681(--),MSTRG.53481(BDG3),MSTRG.54133(REM7),MSTRG.60114(SSL9),MSTRG.63105(CRU4),MSTRG.63106(CRU4),MSTRG.64114(BGLU19),MSTRG.6777(ASK…	MSTRG.10685(PER21),MSTRG.11098(SPH11),MSTRG.13032(GAD4),MSTRG.2126(PORB),MSTRG.23898(--),MSTRG.2486(DXS),MSTRG.25598(IDD4),MSTRG.25796(GLC1),MSTRG.26637(NDX1),MSTRG.27290(PYRE-F),MSTRG.28552(XYL1),MSTRG.43327(DXS),MSTRG.49925(GLIP3),MSTRG.50497(OlnB1),MSTRG.50748(GH3.15),MSTRG.5123(GH3.15),MSTRG.53483(At4g30570),MSTRG.53617(XTH9),MSTRG.53967(NUP98B),MSTRG.55374(TUBB2),MSTRG.56085(ADO2),MSTRG.5863…	900	2581	MSTRG.10530(--),MSTRG.10815(PI1),MSTRG.11978(LBD20),MSTRG.12930(--),MSTRG.13151(GK-2),MSTRG.13220(ICL),MSTRG.13677(PUB51),MSTRG.13940(XCP2),MSTRG.14003(At4g09580),MSTRG.14148(TPS07),MSTRG.14150(TPS07),MSTRG.15341(MAP70.1),MSTRG.15809(ADPG2),MSTRG.16463(BHLH71),MSTRG.16565(TPS09),MSTRG.16675(MIPS),MSTRG.16959(IAA13),MSTRG.17345(SCPL26),MSTRG.19762(F-ATMBP),MSTRG.19763(JAL5),MSTRG.19764(--),MSTRG.1…	MSTRG.10454(BIP2),MSTRG.10614(RPL18AB),MSTRG.10685(PER21),MSTRG.10986(--),MSTRG.11098(SPH11),MSTRG.12266(UBP13),MSTRG.12525(HDA15),MSTRG.13032(GAD4),MSTRG.13033(GAD4),MSTRG.13109(CCT1),MSTRG.13348(SMC1),MSTRG.14893(VLN4),MSTRG.16089(RPS14A),MSTRG.16545(RLM1B),MSTRG.16750(PAB4),MSTRG.17311(NPSN11),MSTRG.18613(--),MSTRG.18640(ULP1D),MSTRG.19700(RHM2),MSTRG.20841(CYP72A13),MSTRG.20883(--),MSTRG.2097…
106394517(BNAC04G48880D),ncbi_106394616(BNAC04G18920D),ncbi_106394651(LOC106394651),ncbi_106394814(LOC106394814),ncbi_106394949(BNAC04G52470D),ncbi_106395034(LOC106395034),ncbi_106395079(LOC106395079),ncbi_106395080(BNAA03G49180D),ncbi_106395114(LOC106395114),ncbi_106395188(LOC106395188),ncbi_106395380(LOC106395380),ncbi_106395414(LOC106395414),ncbi_106395450(LOC106395450),ncbi_106395455(LOC10639…
51918),ncbi_106451999(LOC106451999),ncbi_106452000(LOC106452000),ncbi_106452027(LOC106452027),ncbi_106452073(LOC106452073),ncbi_106452174(LOC106452174),ncbi_106452180(LOC106452180),ncbi_106452193(LOC106452193),ncbi_106452232(LOC106452232),ncbi_106452242(LOC106452242),ncbi_106452244(BNAC05G52130D),ncbi_106452319(LOC106452319),ncbi_106452340(LOC106452340),ncbi_106452365(LOC106452365),ncbi_106452376…
GO:0005575	Cellular Component	GO:0016020	membrane	35	77	MSTRG.10448(GSTF10),MSTRG.13328(--),MSTRG.40007(--),MSTRG.41112(--),MSTRG.46153(CER3),MSTRG.54705(At2g39360),MSTRG.62239(--),MSTRG.64079(NHX8),MSTRG.6777(ASK4),MSTRG.68542(PIP2-5),ncbi_106346513(LOC106346513),ncbi_106348631(LOC106348631),ncbi_106358043(LOC106358043),ncbi_106366568(LOC106366568),ncbi_106373968(LOC106373968),ncbi_106374400(LOC106374400),ncbi_106387484(LOC106387484),ncbi_106387737(L…	MSTRG.13034(NPF8.4),MSTRG.19898(ABCC4),MSTRG.2126(PORB),MSTRG.23258(LAX2),MSTRG.3474(TDR),MSTRG.45579(ABCG25),MSTRG.50497(OlnB1),MSTRG.53967(NUP98B),MSTRG.55374(TUBB2),MSTRG.58633(GSVIVT00026920001),MSTRG.66247(TSJT1),MSTRG.69887(TUBA2),MSTRG.70024(ABCG25),MSTRG.70025(ABCG25),MSTRG.75074(XTH24),MSTRG.76570(HSP90-7),MSTRG.76978(CAP10B),MSTRG.82519(AHA3),ncbi_106345745(LOC106345745),ncbi_106346920(…	207	404	MSTRG.10530(--),MSTRG.13327(--),MSTRG.13328(--),MSTRG.13677(PUB51),MSTRG.15341(MAP70.1),MSTRG.1936(NPF5.2),MSTRG.1937(NPF5.2),MSTRG.19957(TDT),MSTRG.24250(SUC1),MSTRG.27235(PHB1),MSTRG.30059(SKS1),MSTRG.30262(OEP162),MSTRG.30797(RPN2),MSTRG.30967(At4g31860),MSTRG.31164(PXG1),MSTRG.31165(PXG1),MSTRG.32038(--),MSTRG.35858(ABCA11),MSTRG.36629(PIP1-2),MSTRG.38674(CDC48E),MSTRG.39913(DTX25),MSTRG.4145…	MSTRG.10454(BIP2),MSTRG.10614(RPL18AB),MSTRG.14793(At2g25060),MSTRG.15506(AGP20),MSTRG.1567(CSC1),MSTRG.16089(RPS14A),MSTRG.17311(NPSN11),MSTRG.19898(ABCC4),MSTRG.20841(CYP72A13),MSTRG.2126(PORB),MSTRG.21630(MVP1),MSTRG.21872(TGD4),MSTRG.22991(DRP1C),MSTRG.23167(IQD32),MSTRG.23172(At1g19940),MSTRG.23178(At1g20050),MSTRG.23247(MAP70.5),MSTRG.23258(LAX2),MSTRG.25563(RNS1),MSTRG.27682(UXS2),MSTRG.28…
GO:0005575	Cellular Component	GO:0019012	virion	0	0	--	--	2	0	MSTRG.29207(CP33),MSTRG.29494(CP33)	--
GO:0005575	Cellular Component	GO:0030054	cell junction	9	8	MSTRG.10448(GSTF10),MSTRG.13328(--),MSTRG.16565(TPS09),MSTRG.19763(JAL5),MSTRG.3256(BGLU19),MSTRG.64114(BGLU19),MSTRG.84867(JAL5),ncbi_106346131(LOC106346131),ncbi_106395796(LOC106395796)	MSTRG.25796(GLC1),MSTRG.28552(XYL1),MSTRG.55374(TUBB2),MSTRG.66247(TSJT1),MSTRG.69887(TUBA2),MSTRG.76570(HSP90-7),MSTRG.82519(AHA3),ncbi_106389412(LOC106389412)	26	69	MSTRG.13327(--),MSTRG.13328(--),MSTRG.14148(TPS07),MSTRG.16565(TPS09),MSTRG.19763(JAL5),MSTRG.24250(SUC1),MSTRG.30059(SKS1),MSTRG.30797(RPN2),MSTRG.3256(BGLU19),MSTRG.47872(RPS6),MSTRG.57928(BGLU29),MSTRG.64114(BGLU19),MSTRG.66247(TSJT1),MSTRG.66593(CESA3),MSTRG.74372(TPS07),MSTRG.84867(JAL5),MSTRG.90968(--),ncbi_106352587(LOC106352587),ncbi_106382689(LOC106382689),ncbi_106395796(LOC106395796),nc…	MSTRG.10454(BIP2),MSTRG.10614(RPL18AB),MSTRG.12266(UBP13),MSTRG.12448(--),MSTRG.16089(RPS14A),MSTRG.19700(RHM2),MSTRG.20883(--),MSTRG.21630(MVP1),MSTRG.21752(SPH6),MSTRG.22991(DRP1C),MSTRG.23088(PUB27),MSTRG.25796(GLC1),MSTRG.28086(PATL1),MSTRG.28419(RPS6),MSTRG.28552(XYL1),MSTRG.29682(PLDALPHA2),MSTRG.36353(GLC1),MSTRG.36668(PDCB5),MSTRG.38654(ACT5),MSTRG.39237(AHA3),MSTRG.41204(HSP70-2),MSTRG.4…
GO:0005575	Cellular Component	GO:0031012	extracellular matrix	0	1	--	ncbi_106366447(LOC106366447)	1	2	MSTRG.4884(OlnB1)	ncbi_106419374(LOC106419374),ncbi_106448287(LOC106448287)
GO:0005575	Cellular Component	GO:0031974	membrane-enclosed lumen	0	1	--	MSTRG.56085(ADO2)	2	75	MSTRG.56085(ADO2),ncbi_106351054(LOC106351054)	MSTRG.28035(--),MSTRG.33736(NRPD1),MSTRG.83984(--),MSTRG.85156(ARP4A),ncbi_106346060(LOC106346060),ncbi_106346254(LOC106346254),ncbi_106347076(LOC106347076),ncbi_106348975(LOC106348975),ncbi_106352227(LOC106352227),ncbi_106352260(LOC106352260),ncbi_106352553(LOC106352553),ncbi_106356947(LOC106356947),ncbi_106356956(LOC106356956),ncbi_106358257(LOC106358257),ncbi_106360854(LOC106360854),ncbi_10636…
GO:0005575	Cellular Component	GO:0032991	macromolecular complex	4	25	MSTRG.6777(ASK4),MSTRG.92787(CP29B),ncbi_106434019(LOC106434019),ncbi_111212832(LOC111212832)	MSTRG.53967(NUP98B),MSTRG.55374(TUBB2),MSTRG.56085(ADO2),MSTRG.69887(TUBA2),MSTRG.76978(CAP10B),ncbi_106346796(LOC106346796),ncbi_106347994(LOC106347994),ncbi_106353683(LOC106353683),ncbi_106353684(LOC106353684),ncbi_106353845(LOC106353845),ncbi_106354025(LOC106354025),ncbi_106368745(LOC106368745),ncbi_106374842(LOC106374842),ncbi_106380455(LOC106380455),ncbi_106384921(LOC106384921),ncbi_10638928…	36	201	MSTRG.10530(--),MSTRG.19764(--),MSTRG.29207(CP33),MSTRG.29494(CP33),MSTRG.35858(ABCA11),MSTRG.36629(PIP1-2),MSTRG.36630(--),MSTRG.44423(TRB2),MSTRG.48592(CLPR2),MSTRG.51773(CLPR2),MSTRG.56085(ADO2),MSTRG.57458(NDT1),MSTRG.6163(PBE2),MSTRG.65072(GAMMA-ADR),MSTRG.6777(ASK4),MSTRG.70531(SRK2C),MSTRG.78602(CPN60A1),MSTRG.92291(THO2),ncbi_106351551(LOC106351551),ncbi_106361349(LOC106361349),ncbi_10636…	MSTRG.10454(BIP2),MSTRG.10614(RPL18AB),MSTRG.10986(--),MSTRG.13348(SMC1),MSTRG.16089(RPS14A),MSTRG.21630(MVP1),MSTRG.23167(IQD32),MSTRG.23247(MAP70.5),MSTRG.28035(--),MSTRG.28077(RPL10A),MSTRG.3764(At3g14410),MSTRG.41204(HSP70-2),MSTRG.41381(--),MSTRG.48949(CHR17),MSTRG.49916(MVP1),MSTRG.50557(At5g08680),MSTRG.52187(BIP2),MSTRG.52424(RPL18AB),MSTRG.54232(RPS10),MSTRG.55374(TUBB2),MSTRG.56150(--),…
GO:0005575	Cellular Component	GO:0043226	organelle	134	260	MSTRG.10448(GSTF10),MSTRG.13220(ICL),MSTRG.16565(TPS09),MSTRG.19762(F-ATMBP),MSTRG.19763(JAL5),MSTRG.30141(--),MSTRG.3256(BGLU19),MSTRG.39445(OVA6),MSTRG.46021(At5g65490),MSTRG.46153(CER3),MSTRG.50681(--),MSTRG.54133(REM7),MSTRG.60114(SSL9),MSTRG.63105(CRU4),MSTRG.63106(CRU4),MSTRG.64114(BGLU19),MSTRG.6777(ASK4),MSTRG.68555(SMZ),MSTRG.77539(XTH25),MSTRG.84866(F-ATMBP),MSTRG.84867(JAL5),MSTRG.9062…	MSTRG.11098(SPH11),MSTRG.13032(GAD4),MSTRG.2126(PORB),MSTRG.23898(--),MSTRG.2486(DXS),MSTRG.25598(IDD4),MSTRG.26637(NDX1),MSTRG.28552(XYL1),MSTRG.43327(DXS),MSTRG.50497(OlnB1),MSTRG.50748(GH3.15),MSTRG.5123(GH3.15),MSTRG.53483(At4g30570),MSTRG.53967(NUP98B),MSTRG.55374(TUBB2),MSTRG.56085(ADO2),MSTRG.5951(CKX3),MSTRG.66247(TSJT1),MSTRG.69887(TUBA2),MSTRG.70721(UGE4),MSTRG.71346(HDG12),MSTRG.75074(…	729	1912	MSTRG.10530(--),MSTRG.11978(LBD20),MSTRG.13220(ICL),MSTRG.13677(PUB51),MSTRG.13940(XCP2),MSTRG.14003(At4g09580),MSTRG.14148(TPS07),MSTRG.14150(TPS07),MSTRG.15341(MAP70.1),MSTRG.16463(BHLH71),MSTRG.16565(TPS09),MSTRG.16675(MIPS),MSTRG.16959(IAA13),MSTRG.17345(SCPL26),MSTRG.19762(F-ATMBP),MSTRG.19763(JAL5),MSTRG.19764(--),MSTRG.19957(TDT),MSTRG.2049(FIM1),MSTRG.24250(SUC1),MSTRG.25421(BGLU3),MSTRG.…	MSTRG.10454(BIP2),MSTRG.10614(RPL18AB),MSTRG.10986(--),MSTRG.11098(SPH11),MSTRG.12266(UBP13),MSTRG.12525(HDA15),MSTRG.13032(GAD4),MSTRG.13033(GAD4),MSTRG.13348(SMC1),MSTRG.14893(VLN4),MSTRG.16089(RPS14A),MSTRG.16545(RLM1B),MSTRG.17311(NPSN11),MSTRG.18613(--),MSTRG.18640(ULP1D),MSTRG.19700(RHM2),MSTRG.20841(CYP72A13),MSTRG.20883(--),MSTRG.20976(N6amt1),MSTRG.21033(WRKY2),MSTRG.2126(PORB),MSTRG.216…
106412187),ncbi_106412206(LOC106412206),ncbi_106412245(BNAC09G06790D),ncbi_106412248(LOC106412248),ncbi_106412270(LOC106412270),ncbi_106412273(LOC106412273),ncbi_106412364(LOC106412364),ncbi_106412418(LOC106412418),ncbi_106412569(LOC106412569),ncbi_106412578(LOC106412578),ncbi_106412787(LOC106412787),ncbi_106412939(LOC106412939),ncbi_106413036(LOC106413036),ncbi_106413037(BNACNNG35460D),ncbi_1064…
GO:0005575	Cellular Component	GO:0044420	extracellular matrix component	0	0	--	--	1	2	MSTRG.4884(OlnB1)	ncbi_106419374(LOC106419374),ncbi_106448287(LOC106448287)
GO:0005575	Cellular Component	GO:0044421	extracellular region part	0	1	--	MSTRG.49925(GLIP3)	0	7	--	MSTRG.65902(dVPE),MSTRG.70781(dVPE),ncbi_106376026(LOC106376026),ncbi_106401654(LOC106401654),ncbi_106440814(LOC106440814),ncbi_106443495(LOC106443495),ncbi_106447315(LOC106447315)
GO:0005575	Cellular Component	GO:0044422	organelle part	11	62	MSTRG.10448(GSTF10),MSTRG.3256(BGLU19),MSTRG.39445(OVA6),MSTRG.46153(CER3),MSTRG.50681(--),MSTRG.64114(BGLU19),MSTRG.92787(CP29B),ncbi_106363556(LOC106363556),ncbi_106447138(LOC106447138),ncbi_106449626(LOC106449626),ncbi_111207558(LOC111207558)	MSTRG.2126(PORB),MSTRG.2486(DXS),MSTRG.43327(DXS),MSTRG.56085(ADO2),MSTRG.69887(TUBA2),MSTRG.76570(HSP90-7),MSTRG.76978(CAP10B),MSTRG.82519(AHA3),MSTRG.90739(FBP),ncbi_106345742(LOC106345742),ncbi_106346066(LOC106346066),ncbi_106347363(LOC106347363),ncbi_106347364(LOC106347364),ncbi_106347375(LOC106347375),ncbi_106349169(LOC106349169),ncbi_106350588(LOC106350588),ncbi_106358193(BNAANNG40570D),ncb…	82	450	MSTRG.10530(--),MSTRG.15341(MAP70.1),MSTRG.27235(PHB1),MSTRG.29207(CP33),MSTRG.29494(CP33),MSTRG.30059(SKS1),MSTRG.30262(OEP162),MSTRG.30463(At5g05200),MSTRG.30797(RPN2),MSTRG.31164(PXG1),MSTRG.31165(PXG1),MSTRG.3256(BGLU19),MSTRG.36629(PIP1-2),MSTRG.36630(--),MSTRG.39445(OVA6),MSTRG.4145(FAD2),MSTRG.46728(At1g06360),MSTRG.48592(CLPR2),MSTRG.50681(--),MSTRG.51773(CLPR2),MSTRG.52273(PRA1B3),MSTRG.…	MSTRG.10454(BIP2),MSTRG.10614(RPL18AB),MSTRG.10986(--),MSTRG.16089(RPS14A),MSTRG.17311(NPSN11),MSTRG.2126(PORB),MSTRG.21630(MVP1),MSTRG.21872(TGD4),MSTRG.22991(DRP1C),MSTRG.23167(IQD32),MSTRG.23178(At1g20050),MSTRG.23247(MAP70.5),MSTRG.24496(HSK),MSTRG.2736(PTAC10),MSTRG.27682(UXS2),MSTRG.28035(--),MSTRG.28077(RPL10A),MSTRG.29549(GRF9),MSTRG.31232(HSP70-6),MSTRG.33736(NRPD1),MSTRG.34133(purB),MST…
GO:0005575	Cellular Component	GO:0044423	virion part	0	0	--	--	2	0	MSTRG.29207(CP33),MSTRG.29494(CP33)	--
GO:0005575	Cellular Component	GO:0044425	membrane part	19	43	MSTRG.40007(--),MSTRG.46153(CER3),MSTRG.64079(NHX8),MSTRG.68542(PIP2-5),ncbi_106346513(LOC106346513),ncbi_106358043(LOC106358043),ncbi_106374400(LOC106374400),ncbi_106387484(LOC106387484),ncbi_106405032(BNAC03G53020D),ncbi_106432540(LOC106432540),ncbi_106437524(LOC106437524),ncbi_106442787(LOC106442787),ncbi_106450151(LOC106450151),ncbi_106450366(LOC106450366),ncbi_111204477(LOC111204477),ncbi_11…	MSTRG.19898(ABCC4),MSTRG.3474(TDR),MSTRG.45579(ABCG25),MSTRG.50497(OlnB1),MSTRG.53967(NUP98B),MSTRG.58633(GSVIVT00026920001),MSTRG.70024(ABCG25),MSTRG.70025(ABCG25),MSTRG.76978(CAP10B),MSTRG.82519(AHA3),ncbi_106346920(LOC106346920),ncbi_106361985(LOC106361985),ncbi_106364153(LOC106364153),ncbi_106364671(LOC106364671),ncbi_106367342(LOC106367342),ncbi_106367351(LOC106367351),ncbi_106367786(LOC1063…	140	207	MSTRG.10530(--),MSTRG.1936(NPF5.2),MSTRG.1937(NPF5.2),MSTRG.19957(TDT),MSTRG.24250(SUC1),MSTRG.27235(PHB1),MSTRG.30059(SKS1),MSTRG.30262(OEP162),MSTRG.30797(RPN2),MSTRG.31164(PXG1),MSTRG.31165(PXG1),MSTRG.32038(--),MSTRG.36629(PIP1-2),MSTRG.38674(CDC48E),MSTRG.4145(FAD2),MSTRG.46426(YSL3),MSTRG.46728(At1g06360),MSTRG.4884(OlnB1),MSTRG.52273(PRA1B3),MSTRG.54957(ABCG5),MSTRG.55572(NPF2.3),MSTRG.573…	MSTRG.14793(At2g25060),MSTRG.15506(AGP20),MSTRG.1567(CSC1),MSTRG.17311(NPSN11),MSTRG.19898(ABCC4),MSTRG.20841(CYP72A13),MSTRG.21872(TGD4),MSTRG.23178(At1g20050),MSTRG.27682(UXS2),MSTRG.28086(PATL1),MSTRG.35420(ATS1),MSTRG.36668(PDCB5),MSTRG.3764(At3g14410),MSTRG.39237(AHA3),MSTRG.40380(DIT1),MSTRG.41590(TLP1),MSTRG.42277(KAT2),MSTRG.47164(RTNLB8),MSTRG.47667(ATL7),MSTRG.47939(PGPS2),MSTRG.50497(O…
GO:0005575	Cellular Component	GO:0044464	cell part	166	367	MSTRG.10448(GSTF10),MSTRG.10815(PI1),MSTRG.13220(ICL),MSTRG.16565(TPS09),MSTRG.19762(F-ATMBP),MSTRG.19763(JAL5),MSTRG.29116(AFP2),MSTRG.30141(--),MSTRG.3256(BGLU19),MSTRG.39445(OVA6),MSTRG.45506(RAB28),MSTRG.46021(At5g65490),MSTRG.46153(CER3),MSTRG.48219(--),MSTRG.50681(--),MSTRG.53481(BDG3),MSTRG.54133(REM7),MSTRG.60114(SSL9),MSTRG.63105(CRU4),MSTRG.63106(CRU4),MSTRG.64114(BGLU19),MSTRG.6777(ASK…	MSTRG.10685(PER21),MSTRG.11098(SPH11),MSTRG.13032(GAD4),MSTRG.2126(PORB),MSTRG.23898(--),MSTRG.2486(DXS),MSTRG.25598(IDD4),MSTRG.25796(GLC1),MSTRG.26637(NDX1),MSTRG.27290(PYRE-F),MSTRG.28552(XYL1),MSTRG.43327(DXS),MSTRG.49925(GLIP3),MSTRG.50497(OlnB1),MSTRG.50748(GH3.15),MSTRG.5123(GH3.15),MSTRG.53483(At4g30570),MSTRG.53617(XTH9),MSTRG.53967(NUP98B),MSTRG.55374(TUBB2),MSTRG.56085(ADO2),MSTRG.5863…	899	2579	MSTRG.10530(--),MSTRG.10815(PI1),MSTRG.11978(LBD20),MSTRG.12930(--),MSTRG.13151(GK-2),MSTRG.13220(ICL),MSTRG.13677(PUB51),MSTRG.13940(XCP2),MSTRG.14003(At4g09580),MSTRG.14148(TPS07),MSTRG.14150(TPS07),MSTRG.15341(MAP70.1),MSTRG.15809(ADPG2),MSTRG.16463(BHLH71),MSTRG.16565(TPS09),MSTRG.16675(MIPS),MSTRG.16959(IAA13),MSTRG.17345(SCPL26),MSTRG.19762(F-ATMBP),MSTRG.19763(JAL5),MSTRG.19764(--),MSTRG.1…	MSTRG.10454(BIP2),MSTRG.10614(RPL18AB),MSTRG.10685(PER21),MSTRG.10986(--),MSTRG.11098(SPH11),MSTRG.12266(UBP13),MSTRG.12525(HDA15),MSTRG.13032(GAD4),MSTRG.13033(GAD4),MSTRG.13109(CCT1),MSTRG.13348(SMC1),MSTRG.14893(VLN4),MSTRG.16089(RPS14A),MSTRG.16545(RLM1B),MSTRG.16750(PAB4),MSTRG.17311(NPSN11),MSTRG.18613(--),MSTRG.18640(ULP1D),MSTRG.19700(RHM2),MSTRG.20841(CYP72A13),MSTRG.20883(--),MSTRG.2097…
6394616(BNAC04G18920D),ncbi_106394651(LOC106394651),ncbi_106394814(LOC106394814),ncbi_106394949(BNAC04G52470D),ncbi_106395034(LOC106395034),ncbi_106395079(LOC106395079),ncbi_106395080(BNAA03G49180D),ncbi_106395114(LOC106395114),ncbi_106395188(LOC106395188),ncbi_106395380(LOC106395380),ncbi_106395414(LOC106395414),ncbi_106395450(LOC106395450),ncbi_106395455(LOC106395455),ncbi_106395625(LOC10639562…
99),ncbi_106452000(LOC106452000),ncbi_106452027(LOC106452027),ncbi_106452073(LOC106452073),ncbi_106452174(LOC106452174),ncbi_106452180(LOC106452180),ncbi_106452193(LOC106452193),ncbi_106452232(LOC106452232),ncbi_106452242(LOC106452242),ncbi_106452244(BNAC05G52130D),ncbi_106452319(LOC106452319),ncbi_106452340(LOC106452340),ncbi_106452365(LOC106452365),ncbi_106452376(LOC106452376),ncbi_106452386(LO…
GO:0005575	Cellular Component	GO:0099512	supramolecular fiber	0	0	--	--	3	1	MSTRG.15341(MAP70.1),ncbi_106361879(LOC106361879),ncbi_111199790(LOC111199790)	MSTRG.68214(BUBR1)
GO:0008150	Biological Process	GO:0000003	reproduction	36	17	MSTRG.13220(ICL),MSTRG.13328(--),MSTRG.19762(F-ATMBP),MSTRG.30141(--),MSTRG.3256(BGLU19),MSTRG.39445(OVA6),MSTRG.45506(RAB28),MSTRG.46153(CER3),MSTRG.63105(CRU4),MSTRG.63106(CRU4),MSTRG.64114(BGLU19),MSTRG.64292(ABI5),MSTRG.6777(ASK4),MSTRG.68555(SMZ),MSTRG.80799(FH11),ncbi_106360478(LOC106360478),ncbi_106368491(LOC106368491),ncbi_106383523(LOC106383523),ncbi_106384310(LOC106384310),ncbi_10638594…	MSTRG.11098(SPH11),MSTRG.3474(TDR),MSTRG.50497(OlnB1),MSTRG.56085(ADO2),MSTRG.81231(MAP1A),ncbi_106349446(LOC106349446),ncbi_106361259(LOC106361259),ncbi_106390402(LOC106390402),ncbi_106390662(LOC106390662),ncbi_106401716(LOC106401716),ncbi_106401990(LOC106401990),ncbi_106405503(LOC106405503),ncbi_106412254(LOC106412254),ncbi_106416203(LOC106416203),ncbi_106431196(LOC106431196),ncbi_106450805(LOC…	114	186	MSTRG.13220(ICL),MSTRG.13327(--),MSTRG.13328(--),MSTRG.15341(MAP70.1),MSTRG.15809(ADPG2),MSTRG.16675(MIPS),MSTRG.1864(SRG1),MSTRG.19762(F-ATMBP),MSTRG.24250(SUC1),MSTRG.27235(PHB1),MSTRG.29207(CP33),MSTRG.29494(CP33),MSTRG.31164(PXG1),MSTRG.31165(PXG1),MSTRG.3256(BGLU19),MSTRG.35858(ABCA11),MSTRG.39445(OVA6),MSTRG.45506(RAB28),MSTRG.46426(YSL3),MSTRG.48731(ddx11),MSTRG.4884(OlnB1),MSTRG.49978(ECP…	MSTRG.11098(SPH11),MSTRG.18640(ULP1D),MSTRG.23172(At1g19940),MSTRG.25150(SMC4),MSTRG.25151(SMC4),MSTRG.31232(HSP70-6),MSTRG.31856(TWN2),MSTRG.34056(ATO),MSTRG.34747(HSL1),MSTRG.35420(ATS1),MSTRG.43490(RH1),MSTRG.48949(CHR17),MSTRG.49268(AAT1),MSTRG.50497(OlnB1),MSTRG.51977(HTH),MSTRG.53774(At4g01160),MSTRG.54766(--),MSTRG.56127(KIN10A),MSTRG.6156(OPT8),MSTRG.63299(CALS1),MSTRG.63900(At3g56120),MS…
GO:0008150	Biological Process	GO:0001906	cell killing	1	1	MSTRG.29116(AFP2)	MSTRG.35063(At5g46871)	1	3	MSTRG.29116(AFP2)	MSTRG.35057(At5g46871),MSTRG.35063(At5g46871),MSTRG.42030(At5g46871)
GO:0008150	Biological Process	GO:0002376	immune system process	5	8	MSTRG.10448(GSTF10),MSTRG.3256(BGLU19),MSTRG.64114(BGLU19),MSTRG.92787(CP29B),ncbi_106423274(LOC106423274)	MSTRG.49925(GLIP3),MSTRG.71346(HDG12),ncbi_106377486(LOC106377486),ncbi_106400714(LOC106400714),ncbi_106406616(LOC106406616),ncbi_106439324(LOC106439324),ncbi_106439876(LOC106439876),ncbi_111212196(LOC111212196)	15	46	MSTRG.13677(PUB51),MSTRG.16675(MIPS),MSTRG.3256(BGLU19),MSTRG.58876(At1g75040),MSTRG.60257(At1g29670),MSTRG.64114(BGLU19),ncbi_106348119(LOC106348119),ncbi_106360449(LOC106360449),ncbi_106372466(LOC106372466),ncbi_106383209(LOC106383209),ncbi_106403835(LOC106403835),ncbi_106431862(LOC106431862),ncbi_106435321(LOC106435321),ncbi_106437691(LOC106437691),ncbi_106445355(LOC106445355)	MSTRG.2230(At4g28400),MSTRG.23088(PUB27),MSTRG.25150(SMC4),MSTRG.25151(SMC4),MSTRG.26335(CLSY4),MSTRG.33736(NRPD1),MSTRG.37317(At4g28400),MSTRG.55436(NAC062),MSTRG.57926(BGLU28),MSTRG.58627(SGT1B),MSTRG.58983(ARL8C),MSTRG.67395(PBL1),MSTRG.67468(LOL1),MSTRG.71346(HDG12),MSTRG.73771(CLSY4),MSTRG.75496(AAO),MSTRG.75823(ELP2),MSTRG.85156(ARP4A),MSTRG.90894(PUB17),MSTRG.91828(MES19),ncbi_106347418(LO…
GO:0008150	Biological Process	GO:0008152	metabolic process	118	258	MSTRG.10448(GSTF10),MSTRG.10815(PI1),MSTRG.13220(ICL),MSTRG.16565(TPS09),MSTRG.19763(JAL5),MSTRG.26419(ufaA1),MSTRG.29116(AFP2),MSTRG.3256(BGLU19),MSTRG.39445(OVA6),MSTRG.40007(--),MSTRG.41112(--),MSTRG.45506(RAB28),MSTRG.46021(At5g65490),MSTRG.46153(CER3),MSTRG.50304(PCMP-H57),MSTRG.53481(BDG3),MSTRG.54705(At2g39360),MSTRG.60114(SSL9),MSTRG.63105(CRU4),MSTRG.63106(CRU4),MSTRG.64114(BGLU19),MSTRG…	MSTRG.10685(PER21),MSTRG.11098(SPH11),MSTRG.12221(MYBC1),MSTRG.13032(GAD4),MSTRG.19898(ABCC4),MSTRG.2126(PORB),MSTRG.23258(LAX2),MSTRG.24591(SNL5),MSTRG.2486(DXS),MSTRG.25598(IDD4),MSTRG.26637(NDX1),MSTRG.27290(PYRE-F),MSTRG.28552(XYL1),MSTRG.3474(TDR),MSTRG.43327(DXS),MSTRG.49221(TT10),MSTRG.49222(TT10),MSTRG.49925(GLIP3),MSTRG.50748(GH3.15),MSTRG.5123(GH3.15),MSTRG.53483(At4g30570),MSTRG.53617(…	540	1278	MSTRG.10815(PI1),MSTRG.13151(GK-2),MSTRG.13220(ICL),MSTRG.13677(PUB51),MSTRG.13940(XCP2),MSTRG.14003(At4g09580),MSTRG.14148(TPS07),MSTRG.14150(TPS07),MSTRG.14866(SCT),MSTRG.15341(MAP70.1),MSTRG.15809(ADPG2),MSTRG.16463(BHLH71),MSTRG.16565(TPS09),MSTRG.16675(MIPS),MSTRG.16959(IAA13),MSTRG.17345(SCPL26),MSTRG.1864(SRG1),MSTRG.19763(JAL5),MSTRG.19764(--),MSTRG.25421(BGLU3),MSTRG.26050(HST),MSTRG.264…	MSTRG.10454(BIP2),MSTRG.10614(RPL18AB),MSTRG.10685(PER21),MSTRG.10986(--),MSTRG.11098(SPH11),MSTRG.12221(MYBC1),MSTRG.12266(UBP13),MSTRG.12284(PRMT3),MSTRG.12525(HDA15),MSTRG.13032(GAD4),MSTRG.13033(GAD4),MSTRG.13109(CCT1),MSTRG.13348(SMC1),MSTRG.15506(AGP20),MSTRG.16089(RPS14A),MSTRG.16361(IBS1),MSTRG.16750(PAB4),MSTRG.18640(ULP1D),MSTRG.19700(RHM2),MSTRG.19898(ABCC4),MSTRG.20841(CYP72A13),MSTRG…
04208),ncbi_111204212(LOC111204212),ncbi_111204218(LOC111204218),ncbi_111204379(LOC111204379),ncbi_111204554(LOC111204554),ncbi_111205096(LOC111205096),ncbi_111206227(LOC111206227),ncbi_111206323(LOC111206323),ncbi_111206418(LOC111206418),ncbi_111207022(LOC111207022),ncbi_111207131(LOC111207131),ncbi_111207246(LOC111207246),ncbi_111207541(LOC111207541),ncbi_111207588(LOC111207588),ncbi_111207700(…
GO:0008150	Biological Process	GO:0009987	cellular process	107	317	MSTRG.10448(GSTF10),MSTRG.10815(PI1),MSTRG.13220(ICL),MSTRG.13328(--),MSTRG.16565(TPS09),MSTRG.19763(JAL5),MSTRG.29116(AFP2),MSTRG.3256(BGLU19),MSTRG.39445(OVA6),MSTRG.40007(--),MSTRG.41112(--),MSTRG.45506(RAB28),MSTRG.46021(At5g65490),MSTRG.46153(CER3),MSTRG.50304(PCMP-H57),MSTRG.53481(BDG3),MSTRG.54705(At2g39360),MSTRG.5898(DGK4),MSTRG.63105(CRU4),MSTRG.63106(CRU4),MSTRG.64079(NHX8),MSTRG.64114…	MSTRG.10685(PER21),MSTRG.11098(SPH11),MSTRG.13032(GAD4),MSTRG.19898(ABCC4),MSTRG.2126(PORB),MSTRG.23258(LAX2),MSTRG.2486(DXS),MSTRG.25598(IDD4),MSTRG.26637(NDX1),MSTRG.27290(PYRE-F),MSTRG.28552(XYL1),MSTRG.3474(TDR),MSTRG.43327(DXS),MSTRG.45579(ABCG25),MSTRG.49221(TT10),MSTRG.49222(TT10),MSTRG.49925(GLIP3),MSTRG.50497(OlnB1),MSTRG.53483(At4g30570),MSTRG.53617(XTH9),MSTRG.55374(TUBB2),MSTRG.56085(…	506	1737	MSTRG.10815(PI1),MSTRG.11978(LBD20),MSTRG.13151(GK-2),MSTRG.13220(ICL),MSTRG.13327(--),MSTRG.13328(--),MSTRG.13677(PUB51),MSTRG.13940(XCP2),MSTRG.14003(At4g09580),MSTRG.14148(TPS07),MSTRG.14150(TPS07),MSTRG.14866(SCT),MSTRG.15341(MAP70.1),MSTRG.15809(ADPG2),MSTRG.16463(BHLH71),MSTRG.16565(TPS09),MSTRG.16675(MIPS),MSTRG.16959(IAA13),MSTRG.17345(SCPL26),MSTRG.1864(SRG1),MSTRG.19763(JAL5),MSTRG.1976…	MSTRG.10454(BIP2),MSTRG.10614(RPL18AB),MSTRG.10685(PER21),MSTRG.10986(--),MSTRG.11098(SPH11),MSTRG.12266(UBP13),MSTRG.12284(PRMT3),MSTRG.12525(HDA15),MSTRG.13032(GAD4),MSTRG.13033(GAD4),MSTRG.13109(CCT1),MSTRG.13348(SMC1),MSTRG.14893(VLN4),MSTRG.15506(AGP20),MSTRG.16089(RPS14A),MSTRG.16361(IBS1),MSTRG.16545(RLM1B),MSTRG.16750(PAB4),MSTRG.17311(NPSN11),MSTRG.18640(ULP1D),MSTRG.19700(RHM2),MSTRG.19…
24943),ncbi_106425138(LOC106425138),ncbi_106425163(LOC106425163),ncbi_106425374(LOC106425374),ncbi_106425481(LOC106425481),ncbi_106425532(LOC106425532),ncbi_106425829(LOC106425829),ncbi_106425930(LOC106425930),ncbi_106426050(LOC106426050),ncbi_106426240(LOC106426240),ncbi_106426253(LOC106426253),ncbi_106426269(LOC106426269),ncbi_106426315(LOC106426315),ncbi_106426377(LOC106426377),ncbi_106426387(…
GO:0008150	Biological Process	GO:0022414	reproductive process	36	16	MSTRG.13220(ICL),MSTRG.13328(--),MSTRG.19762(F-ATMBP),MSTRG.30141(--),MSTRG.3256(BGLU19),MSTRG.39445(OVA6),MSTRG.45506(RAB28),MSTRG.46153(CER3),MSTRG.63105(CRU4),MSTRG.63106(CRU4),MSTRG.64114(BGLU19),MSTRG.64292(ABI5),MSTRG.6777(ASK4),MSTRG.68555(SMZ),MSTRG.80799(FH11),ncbi_106360478(LOC106360478),ncbi_106368491(LOC106368491),ncbi_106383523(LOC106383523),ncbi_106384310(LOC106384310),ncbi_10638594…	MSTRG.11098(SPH11),MSTRG.3474(TDR),MSTRG.56085(ADO2),MSTRG.81231(MAP1A),ncbi_106349446(LOC106349446),ncbi_106361259(LOC106361259),ncbi_106390402(LOC106390402),ncbi_106390662(LOC106390662),ncbi_106401716(LOC106401716),ncbi_106401990(LOC106401990),ncbi_106405503(LOC106405503),ncbi_106412254(LOC106412254),ncbi_106416203(LOC106416203),ncbi_106431196(LOC106431196),ncbi_106450805(LOC106450805),ncbi_106…	114	185	MSTRG.13220(ICL),MSTRG.13327(--),MSTRG.13328(--),MSTRG.15341(MAP70.1),MSTRG.15809(ADPG2),MSTRG.16675(MIPS),MSTRG.1864(SRG1),MSTRG.19762(F-ATMBP),MSTRG.24250(SUC1),MSTRG.27235(PHB1),MSTRG.29207(CP33),MSTRG.29494(CP33),MSTRG.31164(PXG1),MSTRG.31165(PXG1),MSTRG.3256(BGLU19),MSTRG.35858(ABCA11),MSTRG.39445(OVA6),MSTRG.45506(RAB28),MSTRG.46426(YSL3),MSTRG.48731(ddx11),MSTRG.4884(OlnB1),MSTRG.49978(ECP…	MSTRG.11098(SPH11),MSTRG.18640(ULP1D),MSTRG.23172(At1g19940),MSTRG.25150(SMC4),MSTRG.25151(SMC4),MSTRG.31232(HSP70-6),MSTRG.31856(TWN2),MSTRG.34056(ATO),MSTRG.34747(HSL1),MSTRG.35420(ATS1),MSTRG.43490(RH1),MSTRG.48949(CHR17),MSTRG.49268(AAT1),MSTRG.51977(HTH),MSTRG.53774(At4g01160),MSTRG.54766(--),MSTRG.56127(KIN10A),MSTRG.6156(OPT8),MSTRG.63299(CALS1),MSTRG.63900(At3g56120),MSTRG.65223(At5g27750…
GO:0008150	Biological Process	GO:0022610	biological adhesion	1	5	MSTRG.13328(--)	ncbi_106366952(LOC106366952),ncbi_106388144(LOC106388144),ncbi_106390702(LOC106390702),ncbi_106391428(LOC106391428),ncbi_106437868(LOC106437868)	3	7	MSTRG.13327(--),MSTRG.13328(--),MSTRG.57362(DEK1)	ncbi_106355539(LOC106355539),ncbi_106366952(LOC106366952),ncbi_106388144(LOC106388144),ncbi_106390702(LOC106390702),ncbi_106391428(LOC106391428),ncbi_106437868(LOC106437868),ncbi_106445686(LOC106445686)
GO:0008150	Biological Process	GO:0023052	signaling	16	9	MSTRG.13328(--),MSTRG.19763(JAL5),MSTRG.29116(AFP2),MSTRG.3256(BGLU19),MSTRG.63105(CRU4),MSTRG.63106(CRU4),MSTRG.64114(BGLU19),MSTRG.64292(ABI5),MSTRG.6777(ASK4),MSTRG.68555(SMZ),MSTRG.84867(JAL5),ncbi_106370137(LOC106370137),ncbi_106381476(LOC106381476),ncbi_106414978(LOC106414978),ncbi_106414986(LOC106414986),ncbi_106422524(LOC106422524)	MSTRG.49925(GLIP3),MSTRG.56085(ADO2),MSTRG.66247(TSJT1),MSTRG.75074(XTH24),ncbi_106368421(LOC106368421),ncbi_106402367(LOC106402367),ncbi_106422355(LOC106422355),ncbi_106433087(LOC106433087),ncbi_106438157(LOC106438157)	48	88	MSTRG.11978(LBD20),MSTRG.13151(GK-2),MSTRG.13327(--),MSTRG.13328(--),MSTRG.13677(PUB51),MSTRG.16959(IAA13),MSTRG.1864(SRG1),MSTRG.19763(JAL5),MSTRG.29116(AFP2),MSTRG.31164(PXG1),MSTRG.31165(PXG1),MSTRG.3256(BGLU19),MSTRG.38852(NAC002),MSTRG.41680(At5g57670),MSTRG.44494(SN1),MSTRG.48616(PIF6),MSTRG.53883(AFP1),MSTRG.56085(ADO2),MSTRG.5630(NAC089),MSTRG.58974(BCAT6),MSTRG.63105(CRU4),MSTRG.63106(CR…	MSTRG.19700(RHM2),MSTRG.22991(DRP1C),MSTRG.23088(PUB27),MSTRG.23172(At1g19940),MSTRG.23178(At1g20050),MSTRG.25563(RNS1),MSTRG.29682(PLDALPHA2),MSTRG.34747(HSL1),MSTRG.35420(ATS1),MSTRG.3832(RDR1),MSTRG.47534(CNGC20),MSTRG.52138(At2g30020),MSTRG.53060(ARF11),MSTRG.54788(CML11),MSTRG.55391(ARR13),MSTRG.55436(NAC062),MSTRG.57457(ERS1),MSTRG.57926(BGLU28),MSTRG.58627(SGT1B),MSTRG.58983(ARL8C),MSTRG.6…
GO:0008150	Biological Process	GO:0032501	multicellular organismal process	43	58	MSTRG.13328(--),MSTRG.3256(BGLU19),MSTRG.39445(OVA6),MSTRG.46153(CER3),MSTRG.63105(CRU4),MSTRG.63106(CRU4),MSTRG.64114(BGLU19),MSTRG.64292(ABI5),MSTRG.6777(ASK4),MSTRG.68555(SMZ),MSTRG.80799(FH11),ncbi_106346971(LOC106346971),ncbi_106347025(LOC106347025),ncbi_106351779(LOC106351779),ncbi_106359888(LOC106359888),ncbi_106360031(LOC106360031),ncbi_106360478(LOC106360478),ncbi_106368491(LOC106368491)…	MSTRG.11098(SPH11),MSTRG.2126(PORB),MSTRG.23258(LAX2),MSTRG.23898(--),MSTRG.2486(DXS),MSTRG.25598(IDD4),MSTRG.3474(TDR),MSTRG.34883(At3g59000),MSTRG.43327(DXS),MSTRG.53617(XTH9),MSTRG.56085(ADO2),MSTRG.70025(ABCG25),MSTRG.70721(UGE4),MSTRG.76570(HSP90-7),MSTRG.81231(MAP1A),MSTRG.82204(ALATS),ncbi_106347727(LOC106347727),ncbi_106349132(LOC106349132),ncbi_106349446(LOC106349446),ncbi_106356204(LOC1…	194	458	MSTRG.11978(LBD20),MSTRG.13151(GK-2),MSTRG.13327(--),MSTRG.13328(--),MSTRG.15341(MAP70.1),MSTRG.15809(ADPG2),MSTRG.16463(BHLH71),MSTRG.16675(MIPS),MSTRG.16959(IAA13),MSTRG.1864(SRG1),MSTRG.24250(SUC1),MSTRG.30059(SKS1),MSTRG.31164(PXG1),MSTRG.31165(PXG1),MSTRG.31976(PTAC6),MSTRG.3256(BGLU19),MSTRG.35858(ABCA11),MSTRG.38852(NAC002),MSTRG.39163(XCP2),MSTRG.39445(OVA6),MSTRG.46426(YSL3),MSTRG.54957(…	MSTRG.11098(SPH11),MSTRG.13109(CCT1),MSTRG.15506(AGP20),MSTRG.21033(WRKY2),MSTRG.2126(PORB),MSTRG.22991(DRP1C),MSTRG.23172(At1g19940),MSTRG.23258(LAX2),MSTRG.24240(HAM1),MSTRG.25150(SMC4),MSTRG.25151(SMC4),MSTRG.25598(IDD4),MSTRG.26335(CLSY4),MSTRG.27519(GATA8),MSTRG.29549(GRF9),MSTRG.29682(PLDALPHA2),MSTRG.31362(BLH2),MSTRG.34056(ATO),MSTRG.34421(--),MSTRG.34747(HSL1),MSTRG.35420(ATS1),MSTRG.362…
GO:0008150	Biological Process	GO:0032502	developmental process	70	119	MSTRG.13220(ICL),MSTRG.13328(--),MSTRG.19762(F-ATMBP),MSTRG.30141(--),MSTRG.3256(BGLU19),MSTRG.39445(OVA6),MSTRG.45506(RAB28),MSTRG.46153(CER3),MSTRG.63105(CRU4),MSTRG.63106(CRU4),MSTRG.64114(BGLU19),MSTRG.64292(ABI5),MSTRG.6777(ASK4),MSTRG.68555(SMZ),MSTRG.77438(BSMT1),MSTRG.80799(FH11),ncbi_106345241(LOC106345241),ncbi_106346971(LOC106346971),ncbi_106349060(LOC106349060),ncbi_106351779(LOC10635…	MSTRG.11098(SPH11),MSTRG.2126(PORB),MSTRG.23258(LAX2),MSTRG.23898(--),MSTRG.2486(DXS),MSTRG.25598(IDD4),MSTRG.3474(TDR),MSTRG.34883(At3g59000),MSTRG.43327(DXS),MSTRG.50497(OlnB1),MSTRG.53617(XTH9),MSTRG.56085(ADO2),MSTRG.69887(TUBA2),MSTRG.70025(ABCG25),MSTRG.70721(UGE4),MSTRG.71346(HDG12),MSTRG.75074(XTH24),MSTRG.76570(HSP90-7),MSTRG.81231(MAP1A),MSTRG.82204(ALATS),ncbi_106346829(LOC106346829),n…	260	629	MSTRG.11978(LBD20),MSTRG.13151(GK-2),MSTRG.13220(ICL),MSTRG.13327(--),MSTRG.13328(--),MSTRG.15341(MAP70.1),MSTRG.15809(ADPG2),MSTRG.16675(MIPS),MSTRG.16959(IAA13),MSTRG.1864(SRG1),MSTRG.19762(F-ATMBP),MSTRG.24250(SUC1),MSTRG.27235(PHB1),MSTRG.29207(CP33),MSTRG.29494(CP33),MSTRG.30059(SKS1),MSTRG.31164(PXG1),MSTRG.31165(PXG1),MSTRG.31976(PTAC6),MSTRG.3256(BGLU19),MSTRG.35858(ABCA11),MSTRG.39163(XC…	MSTRG.11098(SPH11),MSTRG.13033(GAD4),MSTRG.13109(CCT1),MSTRG.14893(VLN4),MSTRG.15506(AGP20),MSTRG.18640(ULP1D),MSTRG.21033(WRKY2),MSTRG.2126(PORB),MSTRG.22991(DRP1C),MSTRG.23172(At1g19940),MSTRG.23258(LAX2),MSTRG.24240(HAM1),MSTRG.25150(SMC4),MSTRG.25151(SMC4),MSTRG.25563(RNS1),MSTRG.25598(IDD4),MSTRG.26335(CLSY4),MSTRG.28086(PATL1),MSTRG.29549(GRF9),MSTRG.29682(PLDALPHA2),MSTRG.31232(HSP70-6),MS…
GO:0008150	Biological Process	GO:0040007	growth	4	12	MSTRG.54705(At2g39360),MSTRG.6777(ASK4),ncbi_106358201(LOC106358201),ncbi_106445767(LOC106445767)	MSTRG.23258(LAX2),MSTRG.69887(TUBA2),ncbi_106354194(LOC106354194),ncbi_106359787(LOC106359787),ncbi_106366855(LOC106366855),ncbi_106369294(LOC106369294),ncbi_106376825(LOC106376825),ncbi_106421692(LOC106421692),ncbi_106434029(LOC106434029),ncbi_106450261(LOC106450261),ncbi_106452052(LOC106452052),ncbi_111212563(LOC111212563)	16	76	MSTRG.13151(GK-2),MSTRG.30059(SKS1),MSTRG.35858(ABCA11),MSTRG.54705(At2g39360),MSTRG.55536(GAD2),MSTRG.57362(DEK1),MSTRG.57591(AAK6),MSTRG.66593(CESA3),MSTRG.6777(ASK4),MSTRG.81982(GAD2),ncbi_106364373(BNAC05G23990D),ncbi_106370321(LOC106370321),ncbi_106376118(LOC106376118),ncbi_106379051(LOC106379051),ncbi_106392899(LOC106392899),ncbi_106440600(LOC106440600)	MSTRG.13033(GAD4),MSTRG.14893(VLN4),MSTRG.23172(At1g19940),MSTRG.23258(LAX2),MSTRG.2630(PLP3B),MSTRG.28086(PATL1),MSTRG.29682(PLDALPHA2),MSTRG.34747(HSL1),MSTRG.40380(DIT1),MSTRG.48949(CHR17),MSTRG.49940(ASP4),MSTRG.55391(ARR13),MSTRG.57004(RDL3),MSTRG.68106(At2g39360),MSTRG.80082(--),MSTRG.90161(MEKK1),MSTRG.90445(PERK15),ncbi_106349083(LOC106349083),ncbi_106349473(LOC106349473),ncbi_106354194(L…
GO:0008150	Biological Process	GO:0040011	locomotion	0	4	--	ncbi_106367475(LOC106367475),ncbi_106401246(LOC106401246),ncbi_106407381(LOC106407381),ncbi_106451149(LOC106451149)	0	5	--	MSTRG.89428(PVIP),ncbi_106367475(LOC106367475),ncbi_106371004(LOC106371004),ncbi_106401246(LOC106401246),ncbi_106451149(LOC106451149)
GO:0008150	Biological Process	GO:0044699	single-organism process	157	311	MSTRG.10448(GSTF10),MSTRG.10815(PI1),MSTRG.13220(ICL),MSTRG.13328(--),MSTRG.16565(TPS09),MSTRG.19762(F-ATMBP),MSTRG.19763(JAL5),MSTRG.26419(ufaA1),MSTRG.29116(AFP2),MSTRG.3256(BGLU19),MSTRG.39445(OVA6),MSTRG.40007(--),MSTRG.41112(--),MSTRG.45506(RAB28),MSTRG.46153(CER3),MSTRG.53481(BDG3),MSTRG.54705(At2g39360),MSTRG.60114(SSL9),MSTRG.63105(CRU4),MSTRG.63106(CRU4),MSTRG.64079(NHX8),MSTRG.64114(BGL…	MSTRG.10685(PER21),MSTRG.11098(SPH11),MSTRG.13032(GAD4),MSTRG.19898(ABCC4),MSTRG.2126(PORB),MSTRG.23258(LAX2),MSTRG.23898(--),MSTRG.2486(DXS),MSTRG.25598(IDD4),MSTRG.27290(PYRE-F),MSTRG.3474(TDR),MSTRG.34883(At3g59000),MSTRG.43327(DXS),MSTRG.45579(ABCG25),MSTRG.49221(TT10),MSTRG.49222(TT10),MSTRG.49925(GLIP3),MSTRG.50497(OlnB1),MSTRG.50748(GH3.15),MSTRG.5123(GH3.15),MSTRG.53483(At4g30570),MSTRG.5…	670	1851	MSTRG.10815(PI1),MSTRG.11978(LBD20),MSTRG.13151(GK-2),MSTRG.13220(ICL),MSTRG.13327(--),MSTRG.13328(--),MSTRG.13677(PUB51),MSTRG.13940(XCP2),MSTRG.14003(At4g09580),MSTRG.14148(TPS07),MSTRG.14150(TPS07),MSTRG.14866(SCT),MSTRG.15341(MAP70.1),MSTRG.15809(ADPG2),MSTRG.16463(BHLH71),MSTRG.16565(TPS09),MSTRG.16675(MIPS),MSTRG.16959(IAA13),MSTRG.17345(SCPL26),MSTRG.1864(SRG1),MSTRG.1936(NPF5.2),MSTRG.193…	MSTRG.10454(BIP2),MSTRG.10685(PER21),MSTRG.10986(--),MSTRG.11098(SPH11),MSTRG.12266(UBP13),MSTRG.12284(PRMT3),MSTRG.12525(HDA15),MSTRG.13032(GAD4),MSTRG.13033(GAD4),MSTRG.13109(CCT1),MSTRG.13348(SMC1),MSTRG.14893(VLN4),MSTRG.15506(AGP20),MSTRG.1567(CSC1),MSTRG.17311(NPSN11),MSTRG.19700(RHM2),MSTRG.19898(ABCC4),MSTRG.20841(CYP72A13),MSTRG.21033(WRKY2),MSTRG.2126(PORB),MSTRG.21630(MVP1),MSTRG.21752…
LOC106415086),ncbi_106415202(LOC106415202),ncbi_106415238(LOC106415238),ncbi_106415264(LOC106415264),ncbi_106415318(LOC106415318),ncbi_106415371(LOC106415371),ncbi_106415401(LOC106415401),ncbi_106415432(LOC106415432),ncbi_106415485(LOC106415485),ncbi_106415505(LOC106415505),ncbi_106415546(BNAC04G09850D),ncbi_106415564(LOC106415564),ncbi_106415697(LOC106415697),ncbi_106415712(LOC106415712),ncbi_10…
GO:0008150	Biological Process	GO:0048511	rhythmic process	3	10	MSTRG.92787(CP29B),ncbi_106357692(LOC106357692),ncbi_106437919(LOC106437919)	MSTRG.56085(ADO2),ncbi_106346563(LOC106346563),ncbi_106361388(LOC106361388),ncbi_106367843(LOC106367843),ncbi_106373476(LOC106373476),ncbi_106389757(LOC106389757),ncbi_106415280(LOC106415280),ncbi_106442544(LOC106442544),ncbi_111202229(LOC111202229),ncbi_111215000(LOC111215000)	24	63	MSTRG.2049(FIM1),MSTRG.56085(ADO2),ncbi_106351676(LOC106351676),ncbi_106352950(LOC106352950),ncbi_106353210(LOC106353210),ncbi_106361020(LOC106361020),ncbi_106361055(LOC106361055),ncbi_106361056(LOC106361056),ncbi_106361082(LOC106361082),ncbi_106367739(BNAC08G22810D),ncbi_106371269(LOC106371269),ncbi_106376232(LOC106376232),ncbi_106386669(LOC106386669),ncbi_106388298(LOC106388298),ncbi_106391706(…	MSTRG.20841(CYP72A13),MSTRG.27519(GATA8),MSTRG.36291(GATA8),MSTRG.57457(ERS1),MSTRG.62993(HFR1),MSTRG.92622(WNK9),ncbi_106346563(LOC106346563),ncbi_106349476(LOC106349476),ncbi_106349478(LOC106349478),ncbi_106352831(LOC106352831),ncbi_106353645(LOC106353645),ncbi_106359646(LOC106359646),ncbi_106361388(LOC106361388),ncbi_106362429(LOC106362429),ncbi_106366108(LOC106366108),ncbi_106366711(LOC106366…
GO:0008150	Biological Process	GO:0048518	positive regulation of biological process	2	3	MSTRG.41112(--),ncbi_106392698(LOC106392698)	MSTRG.13032(GAD4),MSTRG.49925(GLIP3),MSTRG.90739(FBP)	9	27	MSTRG.26050(HST),MSTRG.55536(GAD2),MSTRG.61597(At2g29320),MSTRG.72721(4CL1),MSTRG.72722(4CL1),MSTRG.81982(GAD2),ncbi_106351818(LOC106351818),ncbi_106437691(LOC106437691),ncbi_106445355(LOC106445355)	MSTRG.13032(GAD4),MSTRG.13033(GAD4),MSTRG.34155(--),MSTRG.3832(RDR1),MSTRG.47164(RTNLB8),MSTRG.65223(At5g27750),MSTRG.67395(PBL1),MSTRG.68639(ACA11),MSTRG.72133(DDM1),MSTRG.74047(ARF1),MSTRG.90739(FBP),MSTRG.91828(MES19),ncbi_106371715(LOC106371715),ncbi_106376593(LOC106376593),ncbi_106386951(LOC106386951),ncbi_106390788(LOC106390788),ncbi_106392698(LOC106392698),ncbi_106397187(LOC106397187),ncbi…
GO:0008150	Biological Process	GO:0048519	negative regulation of biological process	6	10	MSTRG.10815(PI1),ncbi_106368964(LOC106368964),ncbi_106369110(LOC106369110),ncbi_106391984(LOC106391984),ncbi_106397784(LOC106397784),ncbi_106419899(LOC106419899)	ncbi_106346204(LOC106346204),ncbi_106346205(LOC106346205),ncbi_106350482(LOC106350482),ncbi_106368353(LOC106368353),ncbi_106368421(LOC106368421),ncbi_106435916(LOC106435916),ncbi_106444293(LOC106444293),ncbi_106444294(LOC106444294),ncbi_106444295(LOC106444295),ncbi_106452080(LOC106452080)	22	64	MSTRG.10815(PI1),MSTRG.15341(MAP70.1),MSTRG.43360(CYS4),MSTRG.68421(ACBP4),MSTRG.83994(Mcrs1),ncbi_106346143(LOC106346143),ncbi_106349790(LOC106349790),ncbi_106351134(LOC106351134),ncbi_106368795(LOC106368795),ncbi_106387984(LOC106387984),ncbi_106389671(LOC106389671),ncbi_106391984(LOC106391984),ncbi_106392414(LOC106392414),ncbi_106414046(LOC106414046),ncbi_106415360(LOC106415360),ncbi_106416142(…	MSTRG.14893(VLN4),MSTRG.23178(At1g20050),MSTRG.25150(SMC4),MSTRG.25151(SMC4),MSTRG.26335(CLSY4),MSTRG.33736(NRPD1),MSTRG.3832(RDR1),MSTRG.41311(MYB4),MSTRG.48949(CHR17),MSTRG.4974(PME51),MSTRG.5470(--),MSTRG.56127(KIN10A),MSTRG.66230(SBT1.7),MSTRG.67281(--),MSTRG.69223(DUF1),MSTRG.72133(DDM1),MSTRG.73771(CLSY4),MSTRG.75823(ELP2),MSTRG.83925(At5g05130),MSTRG.85156(ARP4A),MSTRG.87582(RAD51),MSTRG.9…
GO:0008150	Biological Process	GO:0050789	regulation of biological process	29	51	MSTRG.10815(PI1),MSTRG.13328(--),MSTRG.19763(JAL5),MSTRG.29116(AFP2),MSTRG.3256(BGLU19),MSTRG.41112(--),MSTRG.53481(BDG3),MSTRG.54705(At2g39360),MSTRG.63105(CRU4),MSTRG.63106(CRU4),MSTRG.64114(BGLU19),MSTRG.64292(ABI5),MSTRG.6777(ASK4),MSTRG.68555(SMZ),MSTRG.84867(JAL5),MSTRG.92787(CP29B),ncbi_106368964(LOC106368964),ncbi_106369110(LOC106369110),ncbi_106370137(LOC106370137),ncbi_106381476(LOC1063…	MSTRG.12221(MYBC1),MSTRG.13032(GAD4),MSTRG.2126(PORB),MSTRG.23258(LAX2),MSTRG.2486(DXS),MSTRG.25598(IDD4),MSTRG.3474(TDR),MSTRG.43327(DXS),MSTRG.49925(GLIP3),MSTRG.53617(XTH9),MSTRG.56085(ADO2),MSTRG.66247(TSJT1),MSTRG.75074(XTH24),MSTRG.76570(HSP90-7),MSTRG.76978(CAP10B),MSTRG.82204(ALATS),MSTRG.82519(AHA3),MSTRG.90739(FBP),ncbi_106346204(LOC106346204),ncbi_106346205(LOC106346205),ncbi_106348393…	129	362	MSTRG.10815(PI1),MSTRG.11978(LBD20),MSTRG.13151(GK-2),MSTRG.13327(--),MSTRG.13328(--),MSTRG.13677(PUB51),MSTRG.15341(MAP70.1),MSTRG.16463(BHLH71),MSTRG.16959(IAA13),MSTRG.1864(SRG1),MSTRG.19763(JAL5),MSTRG.24250(SUC1),MSTRG.26050(HST),MSTRG.29116(AFP2),MSTRG.31164(PXG1),MSTRG.31165(PXG1),MSTRG.31976(PTAC6),MSTRG.3256(BGLU19),MSTRG.38852(NAC002),MSTRG.39163(XCP2),MSTRG.41680(At5g57670),MSTRG.43360…	MSTRG.10454(BIP2),MSTRG.12221(MYBC1),MSTRG.13032(GAD4),MSTRG.13033(GAD4),MSTRG.13109(CCT1),MSTRG.14893(VLN4),MSTRG.16545(RLM1B),MSTRG.19700(RHM2),MSTRG.21033(WRKY2),MSTRG.2126(PORB),MSTRG.22991(DRP1C),MSTRG.23006(--),MSTRG.23088(PUB27),MSTRG.23172(At1g19940),MSTRG.23178(At1g20050),MSTRG.23258(LAX2),MSTRG.24240(HAM1),MSTRG.25150(SMC4),MSTRG.25151(SMC4),MSTRG.25563(RNS1),MSTRG.25598(IDD4),MSTRG.263…
GO:0008150	Biological Process	GO:0050896	response to stimulus	78	126	MSTRG.10448(GSTF10),MSTRG.10815(PI1),MSTRG.13328(--),MSTRG.19762(F-ATMBP),MSTRG.19763(JAL5),MSTRG.29116(AFP2),MSTRG.3256(BGLU19),MSTRG.48219(--),MSTRG.53481(BDG3),MSTRG.54705(At2g39360),MSTRG.60114(SSL9),MSTRG.62359(At3g50280),MSTRG.63105(CRU4),MSTRG.63106(CRU4),MSTRG.64114(BGLU19),MSTRG.64292(ABI5),MSTRG.6777(ASK4),MSTRG.68542(PIP2-5),MSTRG.68555(SMZ),MSTRG.77539(XTH25),MSTRG.81554(NUDT8),MSTRG.…	MSTRG.10685(PER21),MSTRG.11098(SPH11),MSTRG.12020(LCR18),MSTRG.13032(GAD4),MSTRG.2126(PORB),MSTRG.23258(LAX2),MSTRG.2486(DXS),MSTRG.25796(GLC1),MSTRG.28552(XYL1),MSTRG.34883(At3g59000),MSTRG.35063(At5g46871),MSTRG.43327(DXS),MSTRG.45579(ABCG25),MSTRG.49925(GLIP3),MSTRG.50748(GH3.15),MSTRG.5123(GH3.15),MSTRG.53483(At4g30570),MSTRG.55374(TUBB2),MSTRG.56085(ADO2),MSTRG.66247(TSJT1),MSTRG.69887(TUBA2…	298	578	MSTRG.10815(PI1),MSTRG.11978(LBD20),MSTRG.13151(GK-2),MSTRG.13327(--),MSTRG.13328(--),MSTRG.13677(PUB51),MSTRG.14866(SCT),MSTRG.15341(MAP70.1),MSTRG.16675(MIPS),MSTRG.16959(IAA13),MSTRG.1864(SRG1),MSTRG.1936(NPF5.2),MSTRG.1937(NPF5.2),MSTRG.19762(F-ATMBP),MSTRG.19763(JAL5),MSTRG.24250(SUC1),MSTRG.25421(BGLU3),MSTRG.26050(HST),MSTRG.27235(PHB1),MSTRG.29116(AFP2),MSTRG.30797(RPN2),MSTRG.30828(BGLU3…	MSTRG.10454(BIP2),MSTRG.10685(PER21),MSTRG.11098(SPH11),MSTRG.12020(LCR18),MSTRG.1214(ATTI7),MSTRG.1215(ATTI1),MSTRG.12266(UBP13),MSTRG.12525(HDA15),MSTRG.13032(GAD4),MSTRG.13033(GAD4),MSTRG.13109(CCT1),MSTRG.13348(SMC1),MSTRG.14893(VLN4),MSTRG.15506(AGP20),MSTRG.16545(RLM1B),MSTRG.16750(PAB4),MSTRG.18640(ULP1D),MSTRG.19700(RHM2),MSTRG.21033(WRKY2),MSTRG.2126(PORB),MSTRG.21624(HSP17.4B),MSTRG.216…
GO:0008150	Biological Process	GO:0051179	localization	31	94	MSTRG.10448(GSTF10),MSTRG.10815(PI1),MSTRG.13328(--),MSTRG.3256(BGLU19),MSTRG.41112(--),MSTRG.54705(At2g39360),MSTRG.63105(CRU4),MSTRG.63106(CRU4),MSTRG.64079(NHX8),MSTRG.64114(BGLU19),MSTRG.68542(PIP2-5),ncbi_106345442(LOC106345442),ncbi_106357612(LOC106357612),ncbi_106377370(LOC106377370),ncbi_106382771(LOC106382771),ncbi_106391493(LOC106391493),ncbi_106391519(LOC106391519),ncbi_106396106(LOC10…	MSTRG.10685(PER21),MSTRG.13032(GAD4),MSTRG.13034(NPF8.4),MSTRG.19898(ABCC4),MSTRG.23258(LAX2),MSTRG.2486(DXS),MSTRG.43327(DXS),MSTRG.45579(ABCG25),MSTRG.50497(OlnB1),MSTRG.53967(NUP98B),MSTRG.56085(ADO2),MSTRG.69887(TUBA2),MSTRG.70024(ABCG25),MSTRG.70025(ABCG25),MSTRG.76570(HSP90-7),MSTRG.76978(CAP10B),MSTRG.79263(At1g14780),MSTRG.82204(ALATS),MSTRG.82519(AHA3),MSTRG.8836(HIPP06),MSTRG.90739(FBP)…	202	499	MSTRG.10530(--),MSTRG.10815(PI1),MSTRG.13327(--),MSTRG.13328(--),MSTRG.13677(PUB51),MSTRG.1936(NPF5.2),MSTRG.1937(NPF5.2),MSTRG.19957(TDT),MSTRG.2049(FIM1),MSTRG.24250(SUC1),MSTRG.26050(HST),MSTRG.30262(OEP162),MSTRG.31164(PXG1),MSTRG.31165(PXG1),MSTRG.32038(--),MSTRG.3256(BGLU19),MSTRG.36629(PIP1-2),MSTRG.38674(CDC48E),MSTRG.39854(--),MSTRG.41535(--),MSTRG.46426(YSL3),MSTRG.46728(At1g06360),MSTR…	MSTRG.10685(PER21),MSTRG.10986(--),MSTRG.13032(GAD4),MSTRG.13033(GAD4),MSTRG.13975(ABCB21),MSTRG.14893(VLN4),MSTRG.15506(AGP20),MSTRG.1567(CSC1),MSTRG.17311(NPSN11),MSTRG.19898(ABCC4),MSTRG.20841(CYP72A13),MSTRG.21630(MVP1),MSTRG.21752(SPH6),MSTRG.21872(TGD4),MSTRG.22991(DRP1C),MSTRG.23006(--),MSTRG.23172(At1g19940),MSTRG.23247(MAP70.5),MSTRG.23258(LAX2),MSTRG.25563(RNS1),MSTRG.25692(FPS1),MSTRG.…
GO:0008150	Biological Process	GO:0051704	multi-organism process	25	29	MSTRG.10448(GSTF10),MSTRG.10815(PI1),MSTRG.13328(--),MSTRG.29116(AFP2),MSTRG.3256(BGLU19),MSTRG.64114(BGLU19),MSTRG.6777(ASK4),MSTRG.92787(CP29B),ncbi_106352463(BNAC07G20700D),ncbi_106353544(LOC106353544),ncbi_106360408(LOC106360408),ncbi_106381381(LOC106381381),ncbi_106386368(LOC106386368),ncbi_106387580(LOC106387580),ncbi_106395530(LOC106395530),ncbi_106406688(LOC106406688),ncbi_106417697(LOC10…	MSTRG.10685(PER21),MSTRG.12020(LCR18),MSTRG.23258(LAX2),MSTRG.35063(At5g46871),MSTRG.49925(GLIP3),MSTRG.53483(At4g30570),MSTRG.71346(HDG12),MSTRG.76339(BAM5),MSTRG.90739(FBP),ncbi_106345992(LOC106345992),ncbi_106358259(LOC106358259),ncbi_106367475(LOC106367475),ncbi_106389650(LOC106389650),ncbi_106392416(LOC106392416),ncbi_106401246(LOC106401246),ncbi_106407381(LOC106407381),ncbi_106410530(LOC106…	90	227	MSTRG.10815(PI1),MSTRG.13151(GK-2),MSTRG.13327(--),MSTRG.13328(--),MSTRG.13677(PUB51),MSTRG.16675(MIPS),MSTRG.1936(NPF5.2),MSTRG.1937(NPF5.2),MSTRG.24250(SUC1),MSTRG.25421(BGLU3),MSTRG.29116(AFP2),MSTRG.30828(BGLU3),MSTRG.3256(BGLU19),MSTRG.38852(NAC002),MSTRG.46426(YSL3),MSTRG.46728(At1g06360),MSTRG.47872(RPS6),MSTRG.53883(AFP1),MSTRG.54802(CES101),MSTRG.55572(NPF2.3),MSTRG.57187(SD18),MSTRG.579…	MSTRG.10685(PER21),MSTRG.12020(LCR18),MSTRG.1214(ATTI7),MSTRG.1215(ATTI1),MSTRG.12525(HDA15),MSTRG.16545(RLM1B),MSTRG.16750(PAB4),MSTRG.21630(MVP1),MSTRG.2230(At4g28400),MSTRG.22991(DRP1C),MSTRG.23088(PUB27),MSTRG.23258(LAX2),MSTRG.24496(HSK),MSTRG.28419(RPS6),MSTRG.31232(HSP70-6),MSTRG.34056(ATO),MSTRG.35057(At5g46871),MSTRG.35063(At5g46871),MSTRG.37317(At4g28400),MSTRG.3832(RDR1),MSTRG.40380(DI…
GO:0008150	Biological Process	GO:0065007	biological regulation	40	104	MSTRG.10448(GSTF10),MSTRG.10815(PI1),MSTRG.13328(--),MSTRG.19763(JAL5),MSTRG.29116(AFP2),MSTRG.3256(BGLU19),MSTRG.41112(--),MSTRG.53481(BDG3),MSTRG.54705(At2g39360),MSTRG.63105(CRU4),MSTRG.63106(CRU4),MSTRG.64114(BGLU19),MSTRG.64292(ABI5),MSTRG.6777(ASK4),MSTRG.68555(SMZ),MSTRG.84867(JAL5),MSTRG.92787(CP29B),ncbi_106367745(BNAC08G22870D),ncbi_106368964(LOC106368964),ncbi_106369110(LOC106369110),n…	MSTRG.12221(MYBC1),MSTRG.13032(GAD4),MSTRG.2126(PORB),MSTRG.23258(LAX2),MSTRG.2486(DXS),MSTRG.25598(IDD4),MSTRG.3474(TDR),MSTRG.43327(DXS),MSTRG.49925(GLIP3),MSTRG.50497(OlnB1),MSTRG.50748(GH3.15),MSTRG.5123(GH3.15),MSTRG.53617(XTH9),MSTRG.56085(ADO2),MSTRG.5951(CKX3),MSTRG.66247(TSJT1),MSTRG.75074(XTH24),MSTRG.76570(HSP90-7),MSTRG.76978(CAP10B),MSTRG.82204(ALATS),MSTRG.82519(AHA3),MSTRG.90739(FB…	194	536	MSTRG.10815(PI1),MSTRG.11978(LBD20),MSTRG.13151(GK-2),MSTRG.13327(--),MSTRG.13328(--),MSTRG.13677(PUB51),MSTRG.15341(MAP70.1),MSTRG.16463(BHLH71),MSTRG.16675(MIPS),MSTRG.16959(IAA13),MSTRG.1864(SRG1),MSTRG.19763(JAL5),MSTRG.19957(TDT),MSTRG.24250(SUC1),MSTRG.26050(HST),MSTRG.29116(AFP2),MSTRG.31164(PXG1),MSTRG.31165(PXG1),MSTRG.31976(PTAC6),MSTRG.3256(BGLU19),MSTRG.35858(ABCA11),MSTRG.38852(NAC00…	MSTRG.10454(BIP2),MSTRG.12221(MYBC1),MSTRG.13032(GAD4),MSTRG.13033(GAD4),MSTRG.13109(CCT1),MSTRG.14893(VLN4),MSTRG.16545(RLM1B),MSTRG.16750(PAB4),MSTRG.19700(RHM2),MSTRG.21033(WRKY2),MSTRG.2126(PORB),MSTRG.2230(At4g28400),MSTRG.22991(DRP1C),MSTRG.23006(--),MSTRG.23088(PUB27),MSTRG.23172(At1g19940),MSTRG.23178(At1g20050),MSTRG.23258(LAX2),MSTRG.24240(HAM1),MSTRG.25150(SMC4),MSTRG.25151(SMC4),MSTRG…
GO:0008150	Biological Process	GO:0071840	cellular component organization or biogenesis	22	112	MSTRG.13328(--),MSTRG.16565(TPS09),MSTRG.3256(BGLU19),MSTRG.39445(OVA6),MSTRG.54705(At2g39360),MSTRG.64114(BGLU19),MSTRG.6777(ASK4),MSTRG.68555(SMZ),MSTRG.77539(XTH25),ncbi_106357196(LOC106357196),ncbi_106369401(LOC106369401),ncbi_106373735(LOC106373735),ncbi_106379851(LOC106379851),ncbi_106405000(LOC106405000),ncbi_106414961(LOC106414961),ncbi_106431945(LOC106431945),ncbi_106434563(LOC106434563)…	MSTRG.25598(IDD4),MSTRG.28552(XYL1),MSTRG.50497(OlnB1),MSTRG.53483(At4g30570),MSTRG.53617(XTH9),MSTRG.55374(TUBB2),MSTRG.56085(ADO2),MSTRG.58633(GSVIVT00026920001),MSTRG.69887(TUBA2),MSTRG.70721(UGE4),MSTRG.71346(HDG12),MSTRG.75074(XTH24),MSTRG.76570(HSP90-7),MSTRG.76978(CAP10B),MSTRG.82519(AHA3),MSTRG.90739(FBP),ncbi_106345547(LOC106345547),ncbi_106345548(LOC106345548),ncbi_106345748(LOC10634574…	101	481	MSTRG.13327(--),MSTRG.13328(--),MSTRG.15341(MAP70.1),MSTRG.15809(ADPG2),MSTRG.16565(TPS09),MSTRG.17345(SCPL26),MSTRG.1864(SRG1),MSTRG.27235(PHB1),MSTRG.29207(CP33),MSTRG.29494(CP33),MSTRG.30059(SKS1),MSTRG.31164(PXG1),MSTRG.31165(PXG1),MSTRG.31976(PTAC6),MSTRG.32038(--),MSTRG.3256(BGLU19),MSTRG.35858(ABCA11),MSTRG.36629(PIP1-2),MSTRG.36630(--),MSTRG.39445(OVA6),MSTRG.47278(MYB54),MSTRG.48592(CLPR…	MSTRG.10454(BIP2),MSTRG.10614(RPL18AB),MSTRG.10986(--),MSTRG.12525(HDA15),MSTRG.13109(CCT1),MSTRG.13348(SMC1),MSTRG.14893(VLN4),MSTRG.16089(RPS14A),MSTRG.17311(NPSN11),MSTRG.19700(RHM2),MSTRG.21630(MVP1),MSTRG.21872(TGD4),MSTRG.22991(DRP1C),MSTRG.23172(At1g19940),MSTRG.24240(HAM1),MSTRG.25150(SMC4),MSTRG.25151(SMC4),MSTRG.25598(IDD4),MSTRG.25692(FPS1),MSTRG.2630(PLP3B),MSTRG.26335(CLSY4),MSTRG.28…
GO:0008150	Biological Process	GO:0098754	detoxification	0	0	--	--	0	2	--	MSTRG.59845(HMA5),MSTRG.67468(LOL1)
