# Supplementary material for: Effects of Low Nighttime Temperature on Fatty Acid Content in Developing Seeds from Brassica napus L. Based on RNA-Seq and Metabolome
Source: Plants (Basel). 2023 Jan 10;12(2):325. doi: 10.3390/plants12020325 (PMC9862530; doi:10.3390/plants12020325)
Supplement: Supplementary file 1 [file plants-12-00325-s001.zip › Table S10.xls]

Table S10 GO functional annotation on OSE8vs.OFE18vs.OTE18.
GO ID (level1)	GO Term (level1)	GO ID (level2)	GO Term (level2)	Gene Number(OFE18-vs-OTE18_up)	Gene Number(OFE18-vs-OTE18_down)	Gene List(OFE18-vs-OTE18_up)	Gene List(OFE18-vs-OTE18_down)	Gene Number(OSE18-vs-OFE18_up)	Gene Number(OSE18-vs-OFE18_down)	Gene List(OSE18-vs-OFE18_up)	Gene List(OSE18-vs-OFE18_down)
GO:0003674	Molecular Function	GO:0001071	nucleic acid binding transcription factor activity	5	3	MSTRG.48018(NUC),MSTRG.48768(SCRM),MSTRG.62349(BZIP17),MSTRG.68555(SMZ),MSTRG.92150(IAA26)	MSTRG.34833(MYB101),MSTRG.71346(HDG12),ncbi_106366461(LOC106366461)	7	1	MSTRG.3369(BHLH87),MSTRG.38682(SCRM),MSTRG.57869(SRS7),MSTRG.60418(DOF1.3),MSTRG.80737(ANL2),MSTRG.86884(HDG11),ncbi_106349371(LOC106349371)	MSTRG.16463(BHLH71)
GO:0003674	Molecular Function	GO:0003824	catalytic activity	89	210	MSTRG.14168(TPP2),MSTRG.15982(EMB2360),MSTRG.16565(TPS09),MSTRG.18548(DHDPS2),MSTRG.21863(CDKF-4),MSTRG.28006(CLPB1),MSTRG.29117(ARAC5),MSTRG.29257(APXT),MSTRG.3256(BGLU19),MSTRG.34046(ALDH2B4),MSTRG.35403(PRS2),MSTRG.36353(GLC1),MSTRG.39445(OVA6),MSTRG.4473(SH3P3),MSTRG.46021(At5g65490),MSTRG.48731(ddx11),MSTRG.49327(SAC1),MSTRG.52380(ACT1),MSTRG.53279(PMDH1),MSTRG.54705(At2g39360),MSTRG.55200(O…	MSTRG.10685(PER21),MSTRG.16361(IBS1),MSTRG.16398(YUC10),MSTRG.2126(PORB),MSTRG.21846(At5g67130),MSTRG.24523(At3g51370),MSTRG.2486(DXS),MSTRG.25796(GLC1),MSTRG.28113(At1g71691),MSTRG.3474(TDR),MSTRG.35132(ALA9),MSTRG.39159(At5g56590),MSTRG.39237(AHA3),MSTRG.41404(PGD1),MSTRG.43327(DXS),MSTRG.44234(CKL7),MSTRG.45478(RH46),MSTRG.46972(--),MSTRG.48546(CYP72A15),MSTRG.49016(MSD1),MSTRG.49221(TT10),MST…	94	70	MSTRG.12570(GEK1),MSTRG.14150(TPS07),MSTRG.16565(TPS09),MSTRG.25421(BGLU3),MSTRG.46021(At5g65490),MSTRG.48447(XRN3),MSTRG.49457(PANS2),MSTRG.50494(TSN1),MSTRG.50557(At5g08680),MSTRG.50662(ASP3),MSTRG.50669(ASP3),MSTRG.50681(--),MSTRG.51977(HTH),MSTRG.57231(PDX13),MSTRG.60114(SSL9),MSTRG.68488(TOPP2),MSTRG.75257(FEI2),MSTRG.78831(FAD7),MSTRG.80265(EMB2271),MSTRG.80630(CLPX2),MSTRG.84010(FATA),MSTR…	MSTRG.13940(XCP2),MSTRG.2260(PSAN),MSTRG.25796(GLC1),MSTRG.28101(CYP709B1),MSTRG.31069(XTH24),MSTRG.4473(SH3P3),MSTRG.48395(GRF2),MSTRG.48546(CYP72A15),MSTRG.59845(HMA5),MSTRG.65347(At5g14285),MSTRG.65517(POP2),MSTRG.70159(SCPL6),MSTRG.74365(CBR1),MSTRG.75074(XTH24),MSTRG.85082(AMC5),ncbi_106346945(LOC106346945),ncbi_106351274(LOC106351274),ncbi_106351478(LOC106351478),ncbi_106352104(BNAA06G27620…
GO:0003674	Molecular Function	GO:0004871	signal transducer activity	0	1	--	ncbi_106405412(LOC106405412)	1	0	ncbi_106405412(LOC106405412)	--
GO:0003674	Molecular Function	GO:0005198	structural molecule activity	2	3	MSTRG.52380(ACT1),ncbi_106439857(LOC106439857)	MSTRG.47725(RPS6),MSTRG.55374(TUBB2),MSTRG.69887(TUBA2)	1	0	MSTRG.92203(RPL28A)	--
GO:0003674	Molecular Function	GO:0005215	transporter activity	10	18	MSTRG.30262(OEP162),MSTRG.40007(--),MSTRG.59845(HMA5),MSTRG.89982(GLB3),ncbi_106365928(LOC106365928),ncbi_106372659(LOC106372659),ncbi_106390481(LOC106390481),ncbi_106434742(LOC106434742),ncbi_106442370(LOC106442370),ncbi_106444421(LOC106444421)	MSTRG.23258(LAX2),MSTRG.35132(ALA9),MSTRG.39237(AHA3),MSTRG.39913(DTX25),MSTRG.41324(ER-ANT1),MSTRG.53225(LAX2),MSTRG.56706(At1g75220),MSTRG.82519(AHA3),ncbi_106396451(LOC106396451),ncbi_106406602(LOC106406602),ncbi_106421334(LOC106421334),ncbi_106427771(LOC106427771),ncbi_106429352(LOC106429352),ncbi_106430774(LOC106430774),ncbi_106435168(LOC106435168),ncbi_106438166(LOC106438166),ncbi_106440927…	14	3	MSTRG.13328(--),MSTRG.37274(DTX46),MSTRG.39913(DTX25),MSTRG.50557(At5g08680),MSTRG.78958(DTX46),ncbi_106347049(BNAC09G09160D),ncbi_106358570(LOC106358570),ncbi_106384945(LOC106384945),ncbi_106387176(LOC106387176),ncbi_106397154(LOC106397154),ncbi_106419148(LOC106419148),ncbi_106445406(LOC106445406),ncbi_111201530(LOC111201530),ncbi_111211863(LOC111211863)	MSTRG.59845(HMA5),ncbi_106367956(LOC106367956),ncbi_106396451(LOC106396451)
GO:0003674	Molecular Function	GO:0005488	binding	213	481	MSTRG.15982(EMB2360),MSTRG.19763(JAL5),MSTRG.28006(CLPB1),MSTRG.29117(ARAC5),MSTRG.29257(APXT),MSTRG.3256(BGLU19),MSTRG.35403(PRS2),MSTRG.39445(OVA6),MSTRG.4473(SH3P3),MSTRG.46021(At5g65490),MSTRG.47887(SRP-54C),MSTRG.48018(NUC),MSTRG.48191(--),MSTRG.48731(ddx11),MSTRG.48768(SCRM),MSTRG.48989(--),MSTRG.52380(ACT1),MSTRG.59475(scw1),MSTRG.59845(HMA5),MSTRG.62349(BZIP17),MSTRG.63732(At1g10320),MSTR…	MSTRG.10685(PER21),MSTRG.11098(SPH11),MSTRG.13549(PDV2),MSTRG.16361(IBS1),MSTRG.16398(YUC10),MSTRG.18625(LHCB4.3),MSTRG.2486(DXS),MSTRG.27519(GATA8),MSTRG.3474(TDR),MSTRG.34833(MYB101),MSTRG.35132(ALA9),MSTRG.36291(GATA8),MSTRG.39159(At5g56590),MSTRG.39237(AHA3),MSTRG.41404(PGD1),MSTRG.43327(DXS),MSTRG.45478(RH46),MSTRG.47725(RPS6),MSTRG.48546(CYP72A15),MSTRG.4884(OlnB1),MSTRG.49016(MSD1),MSTRG.5…	219	124	MSTRG.11054(--),MSTRG.12570(GEK1),MSTRG.13328(--),MSTRG.1507(At2g46260),MSTRG.23031(--),MSTRG.30274(NAP1,2),MSTRG.3369(BHLH87),MSTRG.36775(CAMTA2),MSTRG.38682(SCRM),MSTRG.42807(SMC5),MSTRG.44570(RLM1A),MSTRG.46021(At5g65490),MSTRG.49457(PANS2),MSTRG.50494(TSN1),MSTRG.50557(At5g08680),MSTRG.50662(ASP3),MSTRG.50669(ASP3),MSTRG.51977(HTH),MSTRG.56777(CUL1),MSTRG.57231(PDX13),MSTRG.57869(SRS7),MSTRG.…	MSTRG.16463(BHLH71),MSTRG.2260(PSAN),MSTRG.28086(PATL1),MSTRG.28101(CYP709B1),MSTRG.4473(SH3P3),MSTRG.48395(GRF2),MSTRG.48546(CYP72A15),MSTRG.59845(HMA5),MSTRG.63460(--),MSTRG.65517(POP2),MSTRG.85082(AMC5),ncbi_106346376(LOC106346376),ncbi_106346377(LOC106346377),ncbi_106346989(LOC106346989),ncbi_106349062(LOC106349062),ncbi_106349237(LOC106349237),ncbi_106353550(LOC106353550),ncbi_106354033(LOC1…
GO:0003674	Molecular Function	GO:0016209	antioxidant activity	1	2	MSTRG.29257(APXT)	MSTRG.10685(PER21),MSTRG.49016(MSD1)	0	0	--	--
GO:0003674	Molecular Function	GO:0045182	translation regulator activity	0	0	--	--	1	0	ncbi_106384959(LOC106384959)	--
GO:0003674	Molecular Function	GO:0060089	molecular transducer activity	4	4	MSTRG.15982(EMB2360),MSTRG.65472(RACK1B),ncbi_106357633(LOC106357633),ncbi_106440463(LOC106440463)	ncbi_106358362(LOC106358362),ncbi_106394399(LOC106394399),ncbi_106397273(LOC106397273),ncbi_106405412(LOC106405412)	3	1	ncbi_106345371(LOC106345371),ncbi_106405412(LOC106405412),ncbi_106440031(LOC106440031)	ncbi_106364955(LOC106364955)
GO:0003674	Molecular Function	GO:0098772	molecular function regulator	1	2	ncbi_111215388(LOC111215388)	ncbi_106358121(LOC106358121),ncbi_106394586(LOC106394586)	1	2	MSTRG.3369(BHLH87)	ncbi_106354274(LOC106354274),ncbi_106406678(LOC106406678)
GO:0005575	Cellular Component	GO:0005576	extracellular region	3	8	MSTRG.53279(PMDH1),MSTRG.77539(XTH25),ncbi_106365738(LOC106365738)	MSTRG.49221(TT10),MSTRG.49916(MVP1),MSTRG.53617(XTH9),MSTRG.65902(dVPE),MSTRG.66230(SBT1.7),MSTRG.76570(HSP90-7),MSTRG.79188(--),ncbi_106445292(LOC106445292)	0	3	--	MSTRG.28086(PATL1),MSTRG.31069(XTH24),MSTRG.75074(XTH24)
GO:0005575	Cellular Component	GO:0005623	cell	305	484	MSTRG.14168(TPP2),MSTRG.15982(EMB2360),MSTRG.16565(TPS09),MSTRG.18548(DHDPS2),MSTRG.19762(F-ATMBP),MSTRG.19763(JAL5),MSTRG.21863(CDKF-4),MSTRG.25558(RCF3),MSTRG.27078(HOS15),MSTRG.28006(CLPB1),MSTRG.29116(AFP2),MSTRG.29117(ARAC5),MSTRG.29257(APXT),MSTRG.30262(OEP162),MSTRG.3256(BGLU19),MSTRG.35403(PRS2),MSTRG.36353(GLC1),MSTRG.38811(--),MSTRG.39445(OVA6),MSTRG.4473(SH3P3),MSTRG.45799(--),MSTRG.46…	MSTRG.10685(PER21),MSTRG.11098(SPH11),MSTRG.12038(FH11),MSTRG.13549(PDV2),MSTRG.16076(--),MSTRG.18625(LHCB4.3),MSTRG.20735(accB),MSTRG.2126(PORB),MSTRG.23898(--),MSTRG.2486(DXS),MSTRG.25796(GLC1),MSTRG.27519(GATA8),MSTRG.34833(MYB101),MSTRG.35132(ALA9),MSTRG.36291(GATA8),MSTRG.39159(At5g56590),MSTRG.39237(AHA3),MSTRG.41324(ER-ANT1),MSTRG.41404(PGD1),MSTRG.43327(DXS),MSTRG.45478(RH46),MSTRG.47725(…	340	169	MSTRG.11054(--),MSTRG.12558(cwc15-a),MSTRG.12570(GEK1),MSTRG.14148(TPS07),MSTRG.14150(TPS07),MSTRG.1507(At2g46260),MSTRG.16565(TPS09),MSTRG.25421(BGLU3),MSTRG.30274(NAP1,2),MSTRG.3369(BHLH87),MSTRG.36775(CAMTA2),MSTRG.38682(SCRM),MSTRG.41223(At5g40670),MSTRG.42807(SMC5),MSTRG.44570(RLM1A),MSTRG.46021(At5g65490),MSTRG.48447(XRN3),MSTRG.48918(SBE3),MSTRG.49457(PANS2),MSTRG.50011(At3g60360),MSTRG.50…	MSTRG.13940(XCP2),MSTRG.16463(BHLH71),MSTRG.2260(PSAN),MSTRG.25796(GLC1),MSTRG.28086(PATL1),MSTRG.31069(XTH24),MSTRG.4473(SH3P3),MSTRG.48395(GRF2),MSTRG.48546(CYP72A15),MSTRG.52159(--),MSTRG.65347(At5g14285),MSTRG.65517(POP2),MSTRG.70159(SCPL6),MSTRG.74365(CBR1),MSTRG.75074(XTH24),MSTRG.85082(AMC5),MSTRG.85390(At3g27390),MSTRG.90855(GIP),ncbi_106345288(LOC106345288),ncbi_106347375(LOC106347375),n…
GO:0005575	Cellular Component	GO:0016020	membrane	49	106	MSTRG.10441(At1g61900),MSTRG.14168(TPP2),MSTRG.29117(ARAC5),MSTRG.29257(APXT),MSTRG.30262(OEP162),MSTRG.40007(--),MSTRG.48191(--),MSTRG.52380(ACT1),MSTRG.54684(IQD1),MSTRG.54705(At2g39360),MSTRG.58482(KIN13B),MSTRG.59845(HMA5),MSTRG.64291(XCP2),MSTRG.65047(CIPK12),MSTRG.65465(XYLA),MSTRG.65472(RACK1B),MSTRG.65510(SD31),MSTRG.65719(OTU11),MSTRG.70489(At5g05010),MSTRG.80343(PRA1B4),MSTRG.80528(CYTC…	MSTRG.12038(FH11),MSTRG.13549(PDV2),MSTRG.18625(LHCB4.3),MSTRG.2126(PORB),MSTRG.23258(LAX2),MSTRG.24523(At3g51370),MSTRG.3474(TDR),MSTRG.35132(ALA9),MSTRG.39159(At5g56590),MSTRG.39237(AHA3),MSTRG.39913(DTX25),MSTRG.41324(ER-ANT1),MSTRG.48546(CYP72A15),MSTRG.4884(OlnB1),MSTRG.49016(MSD1),MSTRG.49916(MVP1),MSTRG.53225(LAX2),MSTRG.54642(RPN1A),MSTRG.55374(TUBB2),MSTRG.56706(At1g75220),MSTRG.69887(TU…	62	32	MSTRG.13328(--),MSTRG.30274(NAP1,2),MSTRG.37274(DTX46),MSTRG.39913(DTX25),MSTRG.41112(--),MSTRG.41223(At5g40670),MSTRG.44557(--),MSTRG.50557(At5g08680),MSTRG.50656(At3g47200),MSTRG.50662(ASP3),MSTRG.57231(PDX13),MSTRG.61050(At2g31390),MSTRG.73108(CIP7),MSTRG.75257(FEI2),MSTRG.7724(CPP1),MSTRG.78831(FAD7),MSTRG.78958(DTX46),MSTRG.8318(At1g58602),MSTRG.88227(KCS1),MSTRG.90136(CIP7),MSTRG.92203(RPL2…	MSTRG.2260(PSAN),MSTRG.28086(PATL1),MSTRG.31069(XTH24),MSTRG.48395(GRF2),MSTRG.48546(CYP72A15),MSTRG.59845(HMA5),MSTRG.65517(POP2),MSTRG.75074(XTH24),MSTRG.85082(AMC5),ncbi_106346920(LOC106346920),ncbi_106354582(LOC106354582),ncbi_106356433(LOC106356433),ncbi_106369667(LOC106369667),ncbi_106370155(LOC106370155),ncbi_106370244(LOC106370244),ncbi_106372424(LOC106372424),ncbi_106381065(BNAC02G17120D…
GO:0005575	Cellular Component	GO:0019012	virion	1	0	MSTRG.58334(PRP31)	--	0	0	--	--
GO:0005575	Cellular Component	GO:0030054	cell junction	12	15	MSTRG.16565(TPS09),MSTRG.19763(JAL5),MSTRG.3256(BGLU19),MSTRG.36353(GLC1),MSTRG.52380(ACT1),MSTRG.56403(GLC1),MSTRG.64114(BGLU19),MSTRG.70489(At5g05010),MSTRG.84867(JAL5),ncbi_106395796(LOC106395796),ncbi_106433462(LOC106433462),ncbi_106433482(LOC106433482)	MSTRG.21846(At5g67130),MSTRG.25796(GLC1),MSTRG.39237(AHA3),MSTRG.49916(MVP1),MSTRG.54642(RPN1A),MSTRG.55374(TUBB2),MSTRG.69887(TUBA2),MSTRG.76570(HSP90-7),MSTRG.82519(AHA3),ncbi_106385837(LOC106385837),ncbi_106390041(LOC106390041),ncbi_106424151(LOC106424151),ncbi_106424153(LOC106424153),ncbi_106431776(LOC106431776),ncbi_111204573(LOC111204573)	15	6	MSTRG.13328(--),MSTRG.14148(TPS07),MSTRG.16565(TPS09),MSTRG.42807(SMC5),MSTRG.44557(--),MSTRG.50494(TSN1),MSTRG.50662(ASP3),MSTRG.61050(At2g31390),MSTRG.74372(TPS07),MSTRG.92203(RPL28A),ncbi_106359009(LOC106359009),ncbi_106392217(BNAC09G08450D),ncbi_106424471(LOC106424471),ncbi_106424487(LOC106424487),ncbi_106454704(LOC106454704)	MSTRG.25796(GLC1),MSTRG.28086(PATL1),MSTRG.85082(AMC5),ncbi_106391667(BNAC04G47710D),ncbi_106407100(LOC106407100),ncbi_111204573(LOC111204573)
GO:0005575	Cellular Component	GO:0031012	extracellular matrix	0	2	--	MSTRG.4884(OlnB1),ncbi_106366447(LOC106366447)	0	0	--	--
GO:0005575	Cellular Component	GO:0031974	membrane-enclosed lumen	7	1	MSTRG.80528(CYTC-2),ncbi_106365821(LOC106365821),ncbi_106390204(LOC106390204),ncbi_106395076(LOC106395076),ncbi_106418583(LOC106418583),ncbi_106446132(LOC106446132),ncbi_106454197(LOC106454197)	ncbi_106414352(LOC106414352)	10	2	MSTRG.56777(CUL1),ncbi_106358531(LOC106358531),ncbi_106374276(LOC106374276),ncbi_106384981(LOC106384981),ncbi_106389236(LOC106389236),ncbi_106406181(LOC106406181),ncbi_106409127(LOC106409127),ncbi_106410504(BNACNNG22340D),ncbi_106426314(LOC106426314),ncbi_106448630(LOC106448630)	ncbi_106397633(BNAA02G18180D),ncbi_106454908(LOC106454908)
GO:0005575	Cellular Component	GO:0032991	macromolecular complex	17	31	MSTRG.14168(TPP2),MSTRG.27078(HOS15),MSTRG.47887(SRP-54C),MSTRG.58334(PRP31),MSTRG.65465(XYLA),MSTRG.65472(RACK1B),MSTRG.86253(HMGA),MSTRG.92787(CP29B),ncbi_106352313(LOC106352313),ncbi_106369148(LOC106369148),ncbi_106390204(LOC106390204),ncbi_106412170(LOC106412170),ncbi_106419862(LOC106419862),ncbi_106437701(LOC106437701),ncbi_106437825(LOC106437825),ncbi_106450446(LOC106450446),ncbi_106452480(…	MSTRG.18625(LHCB4.3),MSTRG.47725(RPS6),MSTRG.49916(MVP1),MSTRG.54642(RPN1A),MSTRG.55374(TUBB2),MSTRG.68488(TOPP2),MSTRG.69887(TUBA2),MSTRG.72362(LHCA3),MSTRG.76978(CAP10B),ncbi_106353683(LOC106353683),ncbi_106354025(LOC106354025),ncbi_106374842(LOC106374842),ncbi_106375789(LOC106375789),ncbi_106384921(LOC106384921),ncbi_106389287(BNAA03G35660D),ncbi_106389316(BNAC03G41500D),ncbi_106390931(LOC1063…	30	5	MSTRG.12558(cwc15-a),MSTRG.42807(SMC5),MSTRG.50494(TSN1),MSTRG.50557(At5g08680),MSTRG.68488(TOPP2),MSTRG.80265(EMB2271),MSTRG.80821(RS31),MSTRG.88227(KCS1),MSTRG.92203(RPL28A),ncbi_106349374(LOC106349374),ncbi_106358508(LOC106358508),ncbi_106358531(LOC106358531),ncbi_106361337(LOC106361337),ncbi_106372143(LOC106372143),ncbi_106388358(LOC106388358),ncbi_106397054(LOC106397054),ncbi_106402679(LOC10…	MSTRG.2260(PSAN),ncbi_106404848(LOC106404848),ncbi_106408684(LOC106408684),ncbi_106431642(LOC106431642),ncbi_106450446(LOC106450446)
GO:0005575	Cellular Component	GO:0043226	organelle	226	363	MSTRG.14168(TPP2),MSTRG.15982(EMB2360),MSTRG.16565(TPS09),MSTRG.18548(DHDPS2),MSTRG.19762(F-ATMBP),MSTRG.19763(JAL5),MSTRG.25558(RCF3),MSTRG.27078(HOS15),MSTRG.28006(CLPB1),MSTRG.29117(ARAC5),MSTRG.29257(APXT),MSTRG.30262(OEP162),MSTRG.3256(BGLU19),MSTRG.35403(PRS2),MSTRG.38811(--),MSTRG.39445(OVA6),MSTRG.4473(SH3P3),MSTRG.45799(--),MSTRG.46021(At5g65490),MSTRG.48018(NUC),MSTRG.48191(--),MSTRG.48…	MSTRG.11098(SPH11),MSTRG.12038(FH11),MSTRG.13549(PDV2),MSTRG.18625(LHCB4.3),MSTRG.20735(accB),MSTRG.2126(PORB),MSTRG.23898(--),MSTRG.2486(DXS),MSTRG.27519(GATA8),MSTRG.34833(MYB101),MSTRG.35132(ALA9),MSTRG.36291(GATA8),MSTRG.39159(At5g56590),MSTRG.39237(AHA3),MSTRG.41324(ER-ANT1),MSTRG.41404(PGD1),MSTRG.43327(DXS),MSTRG.45478(RH46),MSTRG.47725(RPS6),MSTRG.48546(CYP72A15),MSTRG.4884(OlnB1),MSTRG.4…	251	126	MSTRG.11054(--),MSTRG.12558(cwc15-a),MSTRG.12570(GEK1),MSTRG.14148(TPS07),MSTRG.14150(TPS07),MSTRG.1507(At2g46260),MSTRG.16565(TPS09),MSTRG.25421(BGLU3),MSTRG.30274(NAP1,2),MSTRG.3369(BHLH87),MSTRG.36775(CAMTA2),MSTRG.38682(SCRM),MSTRG.41223(At5g40670),MSTRG.42807(SMC5),MSTRG.44570(RLM1A),MSTRG.46021(At5g65490),MSTRG.48447(XRN3),MSTRG.48918(SBE3),MSTRG.49457(PANS2),MSTRG.50011(At3g60360),MSTRG.50…	MSTRG.13940(XCP2),MSTRG.16463(BHLH71),MSTRG.2260(PSAN),MSTRG.28086(PATL1),MSTRG.31069(XTH24),MSTRG.4473(SH3P3),MSTRG.48395(GRF2),MSTRG.48546(CYP72A15),MSTRG.52159(--),MSTRG.65347(At5g14285),MSTRG.65517(POP2),MSTRG.74365(CBR1),MSTRG.75074(XTH24),MSTRG.85082(AMC5),MSTRG.85390(At3g27390),MSTRG.90855(GIP),ncbi_106345288(LOC106345288),ncbi_106347375(LOC106347375),ncbi_106350610(LOC106350610),ncbi_1063…
GO:0005575	Cellular Component	GO:0044420	extracellular matrix component	0	1	--	MSTRG.4884(OlnB1)	0	0	--	--
GO:0005575	Cellular Component	GO:0044421	extracellular region part	1	2	ncbi_106365738(LOC106365738)	MSTRG.65902(dVPE),ncbi_106445292(LOC106445292)	0	0	--	--
GO:0005575	Cellular Component	GO:0044422	organelle part	51	107	MSTRG.14168(TPP2),MSTRG.15982(EMB2360),MSTRG.28006(CLPB1),MSTRG.29257(APXT),MSTRG.30262(OEP162),MSTRG.3256(BGLU19),MSTRG.39445(OVA6),MSTRG.52380(ACT1),MSTRG.53279(PMDH1),MSTRG.58334(PRP31),MSTRG.64114(BGLU19),MSTRG.65175(--),MSTRG.65465(XYLA),MSTRG.66754(HSP90-6),MSTRG.70489(At5g05010),MSTRG.80343(PRA1B4),MSTRG.80528(CYTC-2),MSTRG.86253(HMGA),MSTRG.92787(CP29B),ncbi_106346226(LOC106346226),ncbi_1…	MSTRG.13549(PDV2),MSTRG.18625(LHCB4.3),MSTRG.2126(PORB),MSTRG.2486(DXS),MSTRG.35132(ALA9),MSTRG.39237(AHA3),MSTRG.41324(ER-ANT1),MSTRG.41404(PGD1),MSTRG.43327(DXS),MSTRG.47725(RPS6),MSTRG.49016(MSD1),MSTRG.49916(MVP1),MSTRG.56706(At1g75220),MSTRG.69887(TUBA2),MSTRG.71454(TERT),MSTRG.72362(LHCA3),MSTRG.76570(HSP90-7),MSTRG.76978(CAP10B),MSTRG.79188(--),MSTRG.82519(AHA3),ncbi_106345742(LOC106345742…	52	23	MSTRG.41223(At5g40670),MSTRG.50557(At5g08680),MSTRG.50662(ASP3),MSTRG.50681(--),MSTRG.56777(CUL1),MSTRG.7724(CPP1),MSTRG.78831(FAD7),MSTRG.87186(EPSIN1),MSTRG.92203(RPL28A),ncbi_106347042(LOC106347042),ncbi_106353872(LOC106353872),ncbi_106358531(LOC106358531),ncbi_106363556(LOC106363556),ncbi_106374276(LOC106374276),ncbi_106375416(LOC106375416),ncbi_106375490(LOC106375490),ncbi_106381505(LOC10638…	MSTRG.2260(PSAN),MSTRG.48395(GRF2),MSTRG.65347(At5g14285),MSTRG.65517(POP2),ncbi_106347375(LOC106347375),ncbi_106358193(BNAANNG40570D),ncbi_106372234(LOC106372234),ncbi_106382019(LOC106382019),ncbi_106391712(LOC106391712),ncbi_106391968(LOC106391968),ncbi_106394892(LOC106394892),ncbi_106397296(LOC106397296),ncbi_106397313(LOC106397313),ncbi_106397633(BNAA02G18180D),ncbi_106401573(LOC106401573),nc…
GO:0005575	Cellular Component	GO:0044423	virion part	1	0	MSTRG.58334(PRP31)	--	0	0	--	--
GO:0005575	Cellular Component	GO:0044425	membrane part	24	67	MSTRG.29257(APXT),MSTRG.30262(OEP162),MSTRG.40007(--),MSTRG.48191(--),MSTRG.59845(HMA5),MSTRG.65465(XYLA),MSTRG.80343(PRA1B4),MSTRG.80528(CYTC-2),MSTRG.92150(IAA26),ncbi_106353834(LOC106353834),ncbi_106354058(LOC106354058),ncbi_106354179(LOC106354179),ncbi_106358043(LOC106358043),ncbi_106365163(LOC106365163),ncbi_106405032(BNAC03G53020D),ncbi_106405053(LOC106405053),ncbi_106414291(LOC106414291),n…	MSTRG.12038(FH11),MSTRG.13549(PDV2),MSTRG.18625(LHCB4.3),MSTRG.3474(TDR),MSTRG.39159(At5g56590),MSTRG.39237(AHA3),MSTRG.41324(ER-ANT1),MSTRG.48546(CYP72A15),MSTRG.4884(OlnB1),MSTRG.49016(MSD1),MSTRG.53225(LAX2),MSTRG.72362(LHCA3),MSTRG.76978(CAP10B),MSTRG.82519(AHA3),ncbi_106347708(LOC106347708),ncbi_106358277(LOC106358277),ncbi_106358285(LOC106358285),ncbi_106360583(LOC106360583),ncbi_106361985(…	34	19	MSTRG.37274(DTX46),MSTRG.41223(At5g40670),MSTRG.50557(At5g08680),MSTRG.50656(At3g47200),MSTRG.61050(At2g31390),MSTRG.75257(FEI2),MSTRG.78958(DTX46),MSTRG.88227(KCS1),ncbi_106356560(LOC106356560),ncbi_106356828(LOC106356828),ncbi_106357013(LOC106357013),ncbi_106364414(LOC106364414),ncbi_106366016(LOC106366016),ncbi_106381325(LOC106381325),ncbi_106388107(LOC106388107),ncbi_106389237(LOC106389237),n…	MSTRG.2260(PSAN),MSTRG.28086(PATL1),MSTRG.48546(CYP72A15),MSTRG.59845(HMA5),ncbi_106346920(LOC106346920),ncbi_106354582(LOC106354582),ncbi_106356433(LOC106356433),ncbi_106369667(LOC106369667),ncbi_106370244(LOC106370244),ncbi_106372424(LOC106372424),ncbi_106384025(LOC106384025),ncbi_106389278(LOC106389278),ncbi_106397176(LOC106397176),ncbi_106401084(LOC106401084),ncbi_106401085(LOC106401085),ncbi…
GO:0005575	Cellular Component	GO:0044464	cell part	305	484	MSTRG.14168(TPP2),MSTRG.15982(EMB2360),MSTRG.16565(TPS09),MSTRG.18548(DHDPS2),MSTRG.19762(F-ATMBP),MSTRG.19763(JAL5),MSTRG.21863(CDKF-4),MSTRG.25558(RCF3),MSTRG.27078(HOS15),MSTRG.28006(CLPB1),MSTRG.29116(AFP2),MSTRG.29117(ARAC5),MSTRG.29257(APXT),MSTRG.30262(OEP162),MSTRG.3256(BGLU19),MSTRG.35403(PRS2),MSTRG.36353(GLC1),MSTRG.38811(--),MSTRG.39445(OVA6),MSTRG.4473(SH3P3),MSTRG.45799(--),MSTRG.46…	MSTRG.10685(PER21),MSTRG.11098(SPH11),MSTRG.12038(FH11),MSTRG.13549(PDV2),MSTRG.16076(--),MSTRG.18625(LHCB4.3),MSTRG.20735(accB),MSTRG.2126(PORB),MSTRG.23898(--),MSTRG.2486(DXS),MSTRG.25796(GLC1),MSTRG.27519(GATA8),MSTRG.34833(MYB101),MSTRG.35132(ALA9),MSTRG.36291(GATA8),MSTRG.39159(At5g56590),MSTRG.39237(AHA3),MSTRG.41324(ER-ANT1),MSTRG.41404(PGD1),MSTRG.43327(DXS),MSTRG.45478(RH46),MSTRG.47725(…	340	169	MSTRG.11054(--),MSTRG.12558(cwc15-a),MSTRG.12570(GEK1),MSTRG.14148(TPS07),MSTRG.14150(TPS07),MSTRG.1507(At2g46260),MSTRG.16565(TPS09),MSTRG.25421(BGLU3),MSTRG.30274(NAP1,2),MSTRG.3369(BHLH87),MSTRG.36775(CAMTA2),MSTRG.38682(SCRM),MSTRG.41223(At5g40670),MSTRG.42807(SMC5),MSTRG.44570(RLM1A),MSTRG.46021(At5g65490),MSTRG.48447(XRN3),MSTRG.48918(SBE3),MSTRG.49457(PANS2),MSTRG.50011(At3g60360),MSTRG.50…	MSTRG.13940(XCP2),MSTRG.16463(BHLH71),MSTRG.2260(PSAN),MSTRG.25796(GLC1),MSTRG.28086(PATL1),MSTRG.31069(XTH24),MSTRG.4473(SH3P3),MSTRG.48395(GRF2),MSTRG.48546(CYP72A15),MSTRG.52159(--),MSTRG.65347(At5g14285),MSTRG.65517(POP2),MSTRG.70159(SCPL6),MSTRG.74365(CBR1),MSTRG.75074(XTH24),MSTRG.85082(AMC5),MSTRG.85390(At3g27390),MSTRG.90855(GIP),ncbi_106345288(LOC106345288),ncbi_106347375(LOC106347375),n…
GO:0005575	Cellular Component	GO:0099512	supramolecular fiber	0	5	--	ncbi_106353865(LOC106353865),ncbi_106353872(LOC106353872),ncbi_106367359(LOC106367359),ncbi_106367435(LOC106367435),ncbi_106406415(LOC106406415)	1	0	ncbi_106353872(LOC106353872)	--
GO:0008150	Biological Process	GO:0000003	reproduction	41	32	MSTRG.15982(EMB2360),MSTRG.19762(F-ATMBP),MSTRG.3256(BGLU19),MSTRG.39445(OVA6),MSTRG.48731(ddx11),MSTRG.48768(SCRM),MSTRG.49978(ECP63),MSTRG.58334(PRP31),MSTRG.64114(BGLU19),MSTRG.65472(RACK1B),MSTRG.65510(SD31),MSTRG.68555(SMZ),ncbi_106346666(LOC106346666),ncbi_106371661(LOC106371661),ncbi_106380118(LOC106380118),ncbi_106382447(LOC106382447),ncbi_106384310(LOC106384310),ncbi_106390591(LOC1063905…	MSTRG.11098(SPH11),MSTRG.12038(FH11),MSTRG.3474(TDR),MSTRG.39159(At5g56590),MSTRG.4884(OlnB1),MSTRG.49016(MSD1),MSTRG.65902(dVPE),MSTRG.66230(SBT1.7),MSTRG.68488(TOPP2),MSTRG.81231(MAP1A),ncbi_106349446(LOC106349446),ncbi_106361259(LOC106361259),ncbi_106367461(LOC106367461),ncbi_106368484(LOC106368484),ncbi_106374260(LOC106374260),ncbi_106382035(LOC106382035),ncbi_106390402(LOC106390402),ncbi_106…	23	10	MSTRG.13328(--),MSTRG.1507(At2g46260),MSTRG.38682(SCRM),MSTRG.51977(HTH),MSTRG.56777(CUL1),MSTRG.57869(SRS7),MSTRG.63106(CRU4),MSTRG.68488(TOPP2),MSTRG.80265(EMB2271),MSTRG.88244(CATHB2),ncbi_106349372(LOC106349372),ncbi_106349397(LOC106349397),ncbi_106355382(LOC106355382),ncbi_106360475(LOC106360475),ncbi_106383523(LOC106383523),ncbi_106385942(LOC106385942),ncbi_106390665(LOC106390665),ncbi_1063…	MSTRG.48395(GRF2),MSTRG.65517(POP2),ncbi_106364667(LOC106364667),ncbi_106370777(LOC106370777),ncbi_106393507(LOC106393507),ncbi_106427941(LOC106427941),ncbi_106430976(LOC106430976),ncbi_106438059(LOC106438059),ncbi_106445425(LOC106445425),ncbi_111198100(LOC111198100)
GO:0008150	Biological Process	GO:0001906	cell killing	1	2	MSTRG.29116(AFP2)	MSTRG.35063(At5g46871),MSTRG.42030(At5g46871)	1	1	MSTRG.42030(At5g46871)	MSTRG.35057(At5g46871)
GO:0008150	Biological Process	GO:0002376	immune system process	5	12	MSTRG.3256(BGLU19),MSTRG.47887(SRP-54C),MSTRG.64114(BGLU19),MSTRG.92787(CP29B),ncbi_106429650(BNAC03G72730D)	MSTRG.41324(ER-ANT1),MSTRG.71346(HDG12),ncbi_106353104(LOC106353104),ncbi_106377486(LOC106377486),ncbi_106389400(LOC106389400),ncbi_106400714(LOC106400714),ncbi_106409464(LOC106409464),ncbi_106415745(LOC106415745),ncbi_106439324(LOC106439324),ncbi_106439876(LOC106439876),ncbi_106444117(LOC106444117),ncbi_111210737(LOC111210737)	5	1	MSTRG.42807(SMC5),ncbi_106381745(LOC106381745),ncbi_106407286(LOC106407286),ncbi_106416656(LOC106416656),ncbi_106423695(LOC106423695)	ncbi_106347820(LOC106347820)
GO:0008150	Biological Process	GO:0008152	metabolic process	154	361	MSTRG.14168(TPP2),MSTRG.15982(EMB2360),MSTRG.16565(TPS09),MSTRG.18548(DHDPS2),MSTRG.19763(JAL5),MSTRG.21863(CDKF-4),MSTRG.27078(HOS15),MSTRG.28006(CLPB1),MSTRG.29116(AFP2),MSTRG.29117(ARAC5),MSTRG.29257(APXT),MSTRG.3256(BGLU19),MSTRG.34046(ALDH2B4),MSTRG.35403(PRS2),MSTRG.36353(GLC1),MSTRG.38811(--),MSTRG.39445(OVA6),MSTRG.40007(--),MSTRG.45799(--),MSTRG.46021(At5g65490),MSTRG.47887(SRP-54C),MSTR…	MSTRG.10685(PER21),MSTRG.11098(SPH11),MSTRG.16076(--),MSTRG.16361(IBS1),MSTRG.16398(YUC10),MSTRG.18625(LHCB4.3),MSTRG.2126(PORB),MSTRG.21846(At5g67130),MSTRG.23258(LAX2),MSTRG.24591(SNL5),MSTRG.2486(DXS),MSTRG.27519(GATA8),MSTRG.28113(At1g71691),MSTRG.3474(TDR),MSTRG.34833(MYB101),MSTRG.36291(GATA8),MSTRG.39159(At5g56590),MSTRG.39237(AHA3),MSTRG.41404(PGD1),MSTRG.43327(DXS),MSTRG.44234(CKL7),MSTR…	186	100	MSTRG.11054(--),MSTRG.14148(TPS07),MSTRG.14150(TPS07),MSTRG.16565(TPS09),MSTRG.23031(--),MSTRG.25421(BGLU3),MSTRG.30274(NAP1,2),MSTRG.3369(BHLH87),MSTRG.36775(CAMTA2),MSTRG.38682(SCRM),MSTRG.41112(--),MSTRG.42807(SMC5),MSTRG.46021(At5g65490),MSTRG.48447(XRN3),MSTRG.48700(SUD1),MSTRG.50011(At3g60360),MSTRG.50494(TSN1),MSTRG.50557(At5g08680),MSTRG.50662(ASP3),MSTRG.50669(ASP3),MSTRG.51977(HTH),MSTR…	MSTRG.13940(XCP2),MSTRG.16463(BHLH71),MSTRG.2260(PSAN),MSTRG.27855(--),MSTRG.28086(PATL1),MSTRG.28101(CYP709B1),MSTRG.31069(XTH24),MSTRG.48395(GRF2),MSTRG.48546(CYP72A15),MSTRG.65347(At5g14285),MSTRG.65517(POP2),MSTRG.70159(SCPL6),MSTRG.74365(CBR1),MSTRG.75074(XTH24),MSTRG.85082(AMC5),ncbi_106345949(LOC106345949),ncbi_106345994(LOC106345994),ncbi_106346234(LOC106346234),ncbi_106348393(LOC10634839…
GO:0008150	Biological Process	GO:0009987	cellular process	172	415	MSTRG.15982(EMB2360),MSTRG.16565(TPS09),MSTRG.18548(DHDPS2),MSTRG.19763(JAL5),MSTRG.21863(CDKF-4),MSTRG.27078(HOS15),MSTRG.28006(CLPB1),MSTRG.29116(AFP2),MSTRG.29117(ARAC5),MSTRG.29257(APXT),MSTRG.3256(BGLU19),MSTRG.34046(ALDH2B4),MSTRG.35403(PRS2),MSTRG.38811(--),MSTRG.39445(OVA6),MSTRG.40007(--),MSTRG.46021(At5g65490),MSTRG.47887(SRP-54C),MSTRG.48018(NUC),MSTRG.48731(ddx11),MSTRG.48768(SCRM),MS…	MSTRG.10685(PER21),MSTRG.11098(SPH11),MSTRG.12038(FH11),MSTRG.13549(PDV2),MSTRG.16076(--),MSTRG.16361(IBS1),MSTRG.16398(YUC10),MSTRG.18625(LHCB4.3),MSTRG.20735(accB),MSTRG.2126(PORB),MSTRG.21846(At5g67130),MSTRG.23258(LAX2),MSTRG.23783(--),MSTRG.2486(DXS),MSTRG.27519(GATA8),MSTRG.3474(TDR),MSTRG.34833(MYB101),MSTRG.36291(GATA8),MSTRG.39159(At5g56590),MSTRG.39237(AHA3),MSTRG.41324(ER-ANT1),MSTRG.4…	197	110	MSTRG.11054(--),MSTRG.12570(GEK1),MSTRG.13328(--),MSTRG.14148(TPS07),MSTRG.14150(TPS07),MSTRG.16565(TPS09),MSTRG.30274(NAP1,2),MSTRG.3369(BHLH87),MSTRG.36775(CAMTA2),MSTRG.37274(DTX46),MSTRG.38682(SCRM),MSTRG.41112(--),MSTRG.42807(SMC5),MSTRG.44570(RLM1A),MSTRG.46021(At5g65490),MSTRG.48447(XRN3),MSTRG.49457(PANS2),MSTRG.50011(At3g60360),MSTRG.50494(TSN1),MSTRG.50557(At5g08680),MSTRG.50662(ASP3),M…	MSTRG.13940(XCP2),MSTRG.16463(BHLH71),MSTRG.2260(PSAN),MSTRG.27855(--),MSTRG.28086(PATL1),MSTRG.31069(XTH24),MSTRG.48395(GRF2),MSTRG.59845(HMA5),MSTRG.65517(POP2),MSTRG.70159(SCPL6),MSTRG.74365(CBR1),MSTRG.75074(XTH24),MSTRG.85082(AMC5),ncbi_106346033(LOC106346033),ncbi_106346165(LOC106346165),ncbi_106346324(LOC106346324),ncbi_106346756(LOC106346756),ncbi_106347491(LOC106347491),ncbi_106347591(LO…
GO:0008150	Biological Process	GO:0022414	reproductive process	41	32	MSTRG.15982(EMB2360),MSTRG.19762(F-ATMBP),MSTRG.3256(BGLU19),MSTRG.39445(OVA6),MSTRG.48731(ddx11),MSTRG.48768(SCRM),MSTRG.49978(ECP63),MSTRG.58334(PRP31),MSTRG.64114(BGLU19),MSTRG.65472(RACK1B),MSTRG.65510(SD31),MSTRG.68555(SMZ),ncbi_106346666(LOC106346666),ncbi_106371661(LOC106371661),ncbi_106380118(LOC106380118),ncbi_106382447(LOC106382447),ncbi_106384310(LOC106384310),ncbi_106390591(LOC1063905…	MSTRG.11098(SPH11),MSTRG.12038(FH11),MSTRG.3474(TDR),MSTRG.39159(At5g56590),MSTRG.4884(OlnB1),MSTRG.49016(MSD1),MSTRG.65902(dVPE),MSTRG.66230(SBT1.7),MSTRG.68488(TOPP2),MSTRG.81231(MAP1A),ncbi_106349446(LOC106349446),ncbi_106361259(LOC106361259),ncbi_106367461(LOC106367461),ncbi_106368484(LOC106368484),ncbi_106374260(LOC106374260),ncbi_106382035(LOC106382035),ncbi_106390402(LOC106390402),ncbi_106…	23	10	MSTRG.13328(--),MSTRG.1507(At2g46260),MSTRG.38682(SCRM),MSTRG.51977(HTH),MSTRG.56777(CUL1),MSTRG.57869(SRS7),MSTRG.63106(CRU4),MSTRG.68488(TOPP2),MSTRG.80265(EMB2271),MSTRG.88244(CATHB2),ncbi_106349372(LOC106349372),ncbi_106349397(LOC106349397),ncbi_106355382(LOC106355382),ncbi_106360475(LOC106360475),ncbi_106383523(LOC106383523),ncbi_106385942(LOC106385942),ncbi_106390665(LOC106390665),ncbi_1063…	MSTRG.48395(GRF2),MSTRG.65517(POP2),ncbi_106364667(LOC106364667),ncbi_106370777(LOC106370777),ncbi_106393507(LOC106393507),ncbi_106427941(LOC106427941),ncbi_106430976(LOC106430976),ncbi_106438059(LOC106438059),ncbi_106445425(LOC106445425),ncbi_111198100(LOC111198100)
GO:0008150	Biological Process	GO:0022610	biological adhesion	0	6	--	ncbi_106368131(LOC106368131),ncbi_106388144(LOC106388144),ncbi_106390702(LOC106390702),ncbi_106415771(LOC106415771),ncbi_106437868(LOC106437868),ncbi_106445686(LOC106445686)	1	1	MSTRG.13328(--)	MSTRG.65517(POP2)
GO:0008150	Biological Process	GO:0023052	signaling	17	10	MSTRG.19763(JAL5),MSTRG.29116(AFP2),MSTRG.29117(ARAC5),MSTRG.29257(APXT),MSTRG.3256(BGLU19),MSTRG.48768(SCRM),MSTRG.53279(PMDH1),MSTRG.62349(BZIP17),MSTRG.64114(BGLU19),MSTRG.65047(CIPK12),MSTRG.65472(RACK1B),MSTRG.68555(SMZ),MSTRG.84867(JAL5),MSTRG.92150(IAA26),ncbi_106347839(LOC106347839),ncbi_106435092(LOC106435092),ncbi_106436870(LOC106436870)	MSTRG.34833(MYB101),MSTRG.53225(LAX2),MSTRG.65902(dVPE),MSTRG.74761(VTC2),ncbi_106380269(LOC106380269),ncbi_106402367(LOC106402367),ncbi_106433087(LOC106433087),ncbi_106450925(LOC106450925),ncbi_111199812(LOC111199812),ncbi_111213671(LOC111213671)	9	6	MSTRG.13328(--),MSTRG.38682(SCRM),MSTRG.56777(CUL1),MSTRG.57869(SRS7),MSTRG.63106(CRU4),ncbi_106384985(LOC106384985),ncbi_106390261(BNAC09G11480D),ncbi_106409417(LOC106409417),ncbi_106426322(LOC106426322)	MSTRG.31069(XTH24),MSTRG.48395(GRF2),MSTRG.75074(XTH24),ncbi_106346033(LOC106346033),ncbi_106347491(LOC106347491),ncbi_106449197(LOC106449197)
GO:0008150	Biological Process	GO:0032501	multicellular organismal process	67	92	MSTRG.15982(EMB2360),MSTRG.29117(ARAC5),MSTRG.3256(BGLU19),MSTRG.39445(OVA6),MSTRG.48018(NUC),MSTRG.48768(SCRM),MSTRG.52380(ACT1),MSTRG.53279(PMDH1),MSTRG.64114(BGLU19),MSTRG.64291(XCP2),MSTRG.65472(RACK1B),MSTRG.65510(SD31),MSTRG.68555(SMZ),MSTRG.92150(IAA26),ncbi_106346666(LOC106346666),ncbi_106353243(LOC106353243),ncbi_106357545(LOC106357545),ncbi_106358581(LOC106358581),ncbi_106359888(LOC1063…	MSTRG.11098(SPH11),MSTRG.12038(FH11),MSTRG.2126(PORB),MSTRG.23258(LAX2),MSTRG.23898(--),MSTRG.2486(DXS),MSTRG.27519(GATA8),MSTRG.3474(TDR),MSTRG.34833(MYB101),MSTRG.36291(GATA8),MSTRG.39159(At5g56590),MSTRG.41324(ER-ANT1),MSTRG.43327(DXS),MSTRG.49016(MSD1),MSTRG.53225(LAX2),MSTRG.53617(XTH9),MSTRG.65902(dVPE),MSTRG.70721(UGE4),MSTRG.76570(HSP90-7),MSTRG.79188(--),MSTRG.81231(MAP1A),ncbi_106349446…	39	25	MSTRG.13328(--),MSTRG.1507(At2g46260),MSTRG.38682(SCRM),MSTRG.50011(At3g60360),MSTRG.50494(TSN1),MSTRG.50662(ASP3),MSTRG.50669(ASP3),MSTRG.51977(HTH),MSTRG.56777(CUL1),MSTRG.57869(SRS7),MSTRG.60418(DOF1.3),MSTRG.63106(CRU4),MSTRG.75257(FEI2),MSTRG.80265(EMB2271),MSTRG.80737(ANL2),MSTRG.88227(KCS1),MSTRG.92203(RPL28A),ncbi_106349372(LOC106349372),ncbi_106349397(LOC106349397),ncbi_106353581(LOC1063…	MSTRG.16463(BHLH71),MSTRG.48395(GRF2),MSTRG.65517(POP2),ncbi_106356289(LOC106356289),ncbi_106364667(LOC106364667),ncbi_106372381(LOC106372381),ncbi_106376261(LOC106376261),ncbi_106386558(LOC106386558),ncbi_106387877(LOC106387877),ncbi_106393507(LOC106393507),ncbi_106400284(LOC106400284),ncbi_106403167(LOC106403167),ncbi_106406065(LOC106406065),ncbi_106412371(LOC106412371),ncbi_106425023(LOC106425…
GO:0008150	Biological Process	GO:0032502	developmental process	93	151	MSTRG.15982(EMB2360),MSTRG.19762(F-ATMBP),MSTRG.29117(ARAC5),MSTRG.3256(BGLU19),MSTRG.39445(OVA6),MSTRG.48018(NUC),MSTRG.48768(SCRM),MSTRG.49978(ECP63),MSTRG.52380(ACT1),MSTRG.53279(PMDH1),MSTRG.58334(PRP31),MSTRG.64114(BGLU19),MSTRG.64291(XCP2),MSTRG.65047(CIPK12),MSTRG.65465(XYLA),MSTRG.65472(RACK1B),MSTRG.65510(SD31),MSTRG.68555(SMZ),MSTRG.77438(BSMT1),MSTRG.86253(HMGA),MSTRG.92150(IAA26),ncbi…	MSTRG.11098(SPH11),MSTRG.12038(FH11),MSTRG.16398(YUC10),MSTRG.2126(PORB),MSTRG.23258(LAX2),MSTRG.23898(--),MSTRG.2486(DXS),MSTRG.3474(TDR),MSTRG.34833(MYB101),MSTRG.39159(At5g56590),MSTRG.41324(ER-ANT1),MSTRG.43327(DXS),MSTRG.4884(OlnB1),MSTRG.49016(MSD1),MSTRG.53225(LAX2),MSTRG.53617(XTH9),MSTRG.65902(dVPE),MSTRG.66230(SBT1.7),MSTRG.67389(YUC10),MSTRG.68488(TOPP2),MSTRG.69887(TUBA2),MSTRG.70721(…	48	40	MSTRG.13328(--),MSTRG.1507(At2g46260),MSTRG.38682(SCRM),MSTRG.48447(XRN3),MSTRG.50662(ASP3),MSTRG.50669(ASP3),MSTRG.51977(HTH),MSTRG.56777(CUL1),MSTRG.57869(SRS7),MSTRG.60418(DOF1.3),MSTRG.63106(CRU4),MSTRG.68488(TOPP2),MSTRG.75257(FEI2),MSTRG.80265(EMB2271),MSTRG.80737(ANL2),MSTRG.86884(HDG11),MSTRG.88227(KCS1),MSTRG.88244(CATHB2),MSTRG.92203(RPL28A),ncbi_106349372(LOC106349372),ncbi_106349397(L…	MSTRG.28086(PATL1),MSTRG.31069(XTH24),MSTRG.48395(GRF2),MSTRG.65517(POP2),MSTRG.75074(XTH24),MSTRG.85082(AMC5),ncbi_106348714(LOC106348714),ncbi_106349745(LOC106349745),ncbi_106351914(LOC106351914),ncbi_106364667(LOC106364667),ncbi_106366248(LOC106366248),ncbi_106368123(LOC106368123),ncbi_106371744(LOC106371744),ncbi_106376346(LOC106376346),ncbi_106377242(LOC106377242),ncbi_106387877(LOC106387877…
GO:0008150	Biological Process	GO:0040007	growth	9	12	MSTRG.29117(ARAC5),MSTRG.52380(ACT1),MSTRG.54705(At2g39360),MSTRG.65465(XYLA),ncbi_106354386(LOC106354386),ncbi_106367591(LOC106367591),ncbi_106405713(LOC106405713),ncbi_106437560(LOC106437560),ncbi_111202980(LOC111202980)	MSTRG.23258(LAX2),MSTRG.53225(LAX2),MSTRG.69887(TUBA2),ncbi_106359787(LOC106359787),ncbi_106365726(LOC106365726),ncbi_106366855(LOC106366855),ncbi_106379186(LOC106379186),ncbi_106401357(LOC106401357),ncbi_106404528(BNAC09G17200D),ncbi_106433584(LOC106433584),ncbi_106440617(LOC106440617),ncbi_111212563(LOC111212563)	6	3	MSTRG.50662(ASP3),MSTRG.50669(ASP3),MSTRG.75257(FEI2),MSTRG.88244(CATHB2),ncbi_106427349(LOC106427349),ncbi_106445387(LOC106445387)	MSTRG.28086(PATL1),MSTRG.85082(AMC5),ncbi_106368123(LOC106368123)
GO:0008150	Biological Process	GO:0040011	locomotion	0	2	--	ncbi_106401246(LOC106401246),ncbi_106451149(LOC106451149)	0	1	--	MSTRG.65517(POP2)
GO:0008150	Biological Process	GO:0044699	single-organism process	192	412	MSTRG.15982(EMB2360),MSTRG.16565(TPS09),MSTRG.18548(DHDPS2),MSTRG.19762(F-ATMBP),MSTRG.19763(JAL5),MSTRG.21863(CDKF-4),MSTRG.27078(HOS15),MSTRG.29116(AFP2),MSTRG.29117(ARAC5),MSTRG.29257(APXT),MSTRG.3256(BGLU19),MSTRG.35403(PRS2),MSTRG.39445(OVA6),MSTRG.40007(--),MSTRG.4473(SH3P3),MSTRG.47887(SRP-54C),MSTRG.48018(NUC),MSTRG.48731(ddx11),MSTRG.48768(SCRM),MSTRG.49327(SAC1),MSTRG.52380(ACT1),MSTRG.…	MSTRG.10685(PER21),MSTRG.11098(SPH11),MSTRG.12038(FH11),MSTRG.16398(YUC10),MSTRG.18625(LHCB4.3),MSTRG.20735(accB),MSTRG.2126(PORB),MSTRG.23258(LAX2),MSTRG.23898(--),MSTRG.2486(DXS),MSTRG.27519(GATA8),MSTRG.28113(At1g71691),MSTRG.3474(TDR),MSTRG.34833(MYB101),MSTRG.35132(ALA9),MSTRG.36291(GATA8),MSTRG.39159(At5g56590),MSTRG.39237(AHA3),MSTRG.41324(ER-ANT1),MSTRG.41404(PGD1),MSTRG.43327(DXS),MSTRG.…	188	118	MSTRG.11054(--),MSTRG.12570(GEK1),MSTRG.13328(--),MSTRG.14148(TPS07),MSTRG.14150(TPS07),MSTRG.1507(At2g46260),MSTRG.16565(TPS09),MSTRG.37274(DTX46),MSTRG.38682(SCRM),MSTRG.41112(--),MSTRG.42807(SMC5),MSTRG.48447(XRN3),MSTRG.49457(PANS2),MSTRG.50011(At3g60360),MSTRG.50494(TSN1),MSTRG.50557(At5g08680),MSTRG.50656(At3g47200),MSTRG.50662(ASP3),MSTRG.50669(ASP3),MSTRG.51977(HTH),MSTRG.56777(CUL1),MSTR…	MSTRG.13940(XCP2),MSTRG.16463(BHLH71),MSTRG.2260(PSAN),MSTRG.27855(--),MSTRG.28086(PATL1),MSTRG.28101(CYP709B1),MSTRG.31069(XTH24),MSTRG.4473(SH3P3),MSTRG.48395(GRF2),MSTRG.48546(CYP72A15),MSTRG.59845(HMA5),MSTRG.63460(--),MSTRG.65517(POP2),MSTRG.70159(SCPL6),MSTRG.75074(XTH24),MSTRG.85082(AMC5),ncbi_106346033(LOC106346033),ncbi_106346324(LOC106346324),ncbi_106346756(LOC106346756),ncbi_106347491(…
GO:0008150	Biological Process	GO:0048511	rhythmic process	7	20	MSTRG.92787(CP29B),ncbi_106357692(LOC106357692),ncbi_106358818(LOC106358818),ncbi_106361082(LOC106361082),ncbi_106370891(LOC106370891),ncbi_106437919(LOC106437919),ncbi_106445956(LOC106445956)	MSTRG.27519(GATA8),MSTRG.36291(GATA8),MSTRG.91301(At4g15430),ncbi_106349476(LOC106349476),ncbi_106349478(LOC106349478),ncbi_106361388(LOC106361388),ncbi_106367978(LOC106367978),ncbi_106367982(LOC106367982),ncbi_106373476(LOC106373476),ncbi_106388815(LOC106388815),ncbi_106402310(LOC106402310),ncbi_106402566(LOC106402566),ncbi_106411136(LOC106411136),ncbi_106411324(LOC106411324),ncbi_106415280(LOC1…	8	8	ncbi_106346798(LOC106346798),ncbi_106368821(LOC106368821),ncbi_106375527(LOC106375527),ncbi_106405641(LOC106405641),ncbi_106406949(LOC106406949),ncbi_106426835(LOC106426835),ncbi_106448680(LOC106448680),ncbi_106448940(LOC106448940)	ncbi_106346563(LOC106346563),ncbi_106366417(LOC106366417),ncbi_106368075(LOC106368075),ncbi_106401886(LOC106401886),ncbi_106411335(LOC106411335),ncbi_106434737(LOC106434737),ncbi_106442544(LOC106442544),ncbi_111202229(LOC111202229)
GO:0008150	Biological Process	GO:0048518	positive regulation of biological process	3	3	MSTRG.48768(SCRM),MSTRG.53279(PMDH1),ncbi_106438717(LOC106438717)	ncbi_106401570(LOC106401570),ncbi_106445794(LOC106445794),ncbi_106449296(LOC106449296)	3	0	MSTRG.38682(SCRM),MSTRG.41112(--),ncbi_106381745(LOC106381745)	--
GO:0008150	Biological Process	GO:0048519	negative regulation of biological process	6	17	MSTRG.27078(HOS15),MSTRG.47887(SRP-54C),ncbi_106368964(LOC106368964),ncbi_106397784(LOC106397784),ncbi_106435092(LOC106435092),ncbi_106438885(LOC106438885)	MSTRG.39159(At5g56590),MSTRG.66230(SBT1.7),MSTRG.83925(At5g05130),ncbi_106346204(LOC106346204),ncbi_106346205(LOC106346205),ncbi_106350482(LOC106350482),ncbi_106353383(LOC106353383),ncbi_106361814(LOC106361814),ncbi_106364739(LOC106364739),ncbi_106368353(LOC106368353),ncbi_106376126(LOC106376126),ncbi_106401504(LOC106401504),ncbi_106402545(LOC106402545),ncbi_106424220(LOC106424220),ncbi_106429939…	6	4	MSTRG.42807(SMC5),MSTRG.50494(TSN1),ncbi_106358520(LOC106358520),ncbi_106385039(LOC106385039),ncbi_106402545(LOC106402545),ncbi_106434309(LOC106434309)	ncbi_106387877(LOC106387877),ncbi_106399764(LOC106399764),ncbi_106434297(LOC106434297),ncbi_106437706(LOC106437706)
GO:0008150	Biological Process	GO:0050789	regulation of biological process	38	66	MSTRG.19763(JAL5),MSTRG.21863(CDKF-4),MSTRG.27078(HOS15),MSTRG.28006(CLPB1),MSTRG.29116(AFP2),MSTRG.29117(ARAC5),MSTRG.29257(APXT),MSTRG.3256(BGLU19),MSTRG.45799(--),MSTRG.47887(SRP-54C),MSTRG.48018(NUC),MSTRG.48731(ddx11),MSTRG.48768(SCRM),MSTRG.53279(PMDH1),MSTRG.54705(At2g39360),MSTRG.62349(BZIP17),MSTRG.64114(BGLU19),MSTRG.64291(XCP2),MSTRG.65047(CIPK12),MSTRG.65472(RACK1B),MSTRG.68555(SMZ),M…	MSTRG.18625(LHCB4.3),MSTRG.2126(PORB),MSTRG.23258(LAX2),MSTRG.2486(DXS),MSTRG.27519(GATA8),MSTRG.3474(TDR),MSTRG.34833(MYB101),MSTRG.36291(GATA8),MSTRG.39159(At5g56590),MSTRG.39237(AHA3),MSTRG.43327(DXS),MSTRG.53225(LAX2),MSTRG.53617(XTH9),MSTRG.54642(RPN1A),MSTRG.65902(dVPE),MSTRG.66230(SBT1.7),MSTRG.74761(VTC2),MSTRG.76570(HSP90-7),MSTRG.76978(CAP10B),MSTRG.82519(AHA3),MSTRG.83925(At5g05130),MS…	43	27	MSTRG.13328(--),MSTRG.23031(--),MSTRG.3369(BHLH87),MSTRG.36775(CAMTA2),MSTRG.38682(SCRM),MSTRG.41112(--),MSTRG.42807(SMC5),MSTRG.44570(RLM1A),MSTRG.48447(XRN3),MSTRG.50494(TSN1),MSTRG.56777(CUL1),MSTRG.57869(SRS7),MSTRG.60418(DOF1.3),MSTRG.63106(CRU4),MSTRG.74216(--),MSTRG.80506(WRKY18),MSTRG.80737(ANL2),MSTRG.86884(HDG11),MSTRG.88244(CATHB2),MSTRG.92203(RPL28A),ncbi_106345973(LOC106345973),ncbi_…	MSTRG.16463(BHLH71),MSTRG.2260(PSAN),MSTRG.27855(--),MSTRG.31069(XTH24),MSTRG.48395(GRF2),MSTRG.75074(XTH24),ncbi_106346033(LOC106346033),ncbi_106347491(LOC106347491),ncbi_106348393(LOC106348393),ncbi_106357116(LOC106357116),ncbi_106359761(LOC106359761),ncbi_106365422(LOC106365422),ncbi_106370777(LOC106370777),ncbi_106374946(LOC106374946),ncbi_106376492(LOC106376492),ncbi_106387877(LOC106387877),…
GO:0008150	Biological Process	GO:0050896	response to stimulus	96	135	MSTRG.14168(TPP2),MSTRG.15982(EMB2360),MSTRG.19762(F-ATMBP),MSTRG.19763(JAL5),MSTRG.25558(RCF3),MSTRG.27078(HOS15),MSTRG.28006(CLPB1),MSTRG.29116(AFP2),MSTRG.29117(ARAC5),MSTRG.29257(APXT),MSTRG.3256(BGLU19),MSTRG.36353(GLC1),MSTRG.38811(--),MSTRG.47887(SRP-54C),MSTRG.48018(NUC),MSTRG.48219(--),MSTRG.48731(ddx11),MSTRG.48768(SCRM),MSTRG.52380(ACT1),MSTRG.53279(PMDH1),MSTRG.54705(At2g39360),MSTRG.…	MSTRG.10685(PER21),MSTRG.11098(SPH11),MSTRG.18625(LHCB4.3),MSTRG.2126(PORB),MSTRG.23258(LAX2),MSTRG.23783(--),MSTRG.2486(DXS),MSTRG.25796(GLC1),MSTRG.34833(MYB101),MSTRG.35063(At5g46871),MSTRG.39159(At5g56590),MSTRG.39237(AHA3),MSTRG.41324(ER-ANT1),MSTRG.41404(PGD1),MSTRG.42030(At5g46871),MSTRG.43327(DXS),MSTRG.49016(MSD1),MSTRG.49916(MVP1),MSTRG.53225(LAX2),MSTRG.54642(RPN1A),MSTRG.55374(TUBB2),…	77	52	MSTRG.12570(GEK1),MSTRG.13328(--),MSTRG.1507(At2g46260),MSTRG.25421(BGLU3),MSTRG.30274(NAP1,2),MSTRG.3369(BHLH87),MSTRG.36775(CAMTA2),MSTRG.38682(SCRM),MSTRG.42030(At5g46871),MSTRG.42807(SMC5),MSTRG.44570(RLM1A),MSTRG.48447(XRN3),MSTRG.50494(TSN1),MSTRG.50557(At5g08680),MSTRG.50654(RPP1),MSTRG.50662(ASP3),MSTRG.50669(ASP3),MSTRG.56777(CUL1),MSTRG.57231(PDX13),MSTRG.57869(SRS7),MSTRG.60114(SSL9),M…	MSTRG.19625(DSC2),MSTRG.25796(GLC1),MSTRG.27855(--),MSTRG.28086(PATL1),MSTRG.31069(XTH24),MSTRG.35057(At5g46871),MSTRG.48395(GRF2),MSTRG.59845(HMA5),MSTRG.63460(--),MSTRG.65517(POP2),MSTRG.75074(XTH24),MSTRG.85082(AMC5),MSTRG.8916(LCR81),ncbi_106346033(LOC106346033),ncbi_106346926(LOC106346926),ncbi_106347491(LOC106347491),ncbi_106347591(LOC106347591),ncbi_106347820(LOC106347820),ncbi_106348260(L…
GO:0008150	Biological Process	GO:0051179	localization	48	140	MSTRG.15982(EMB2360),MSTRG.30262(OEP162),MSTRG.3256(BGLU19),MSTRG.47887(SRP-54C),MSTRG.48018(NUC),MSTRG.48768(SCRM),MSTRG.52380(ACT1),MSTRG.53279(PMDH1),MSTRG.54705(At2g39360),MSTRG.59845(HMA5),MSTRG.64114(BGLU19),MSTRG.65465(XYLA),MSTRG.70489(At5g05010),MSTRG.80343(PRA1B4),MSTRG.89982(GLB3),ncbi_106346311(LOC106346311),ncbi_106346480(LOC106346480),ncbi_106353087(LOC106353087),ncbi_106354242(LOC1…	MSTRG.10685(PER21),MSTRG.16076(--),MSTRG.18625(LHCB4.3),MSTRG.20735(accB),MSTRG.23258(LAX2),MSTRG.2486(DXS),MSTRG.35132(ALA9),MSTRG.39237(AHA3),MSTRG.41324(ER-ANT1),MSTRG.43327(DXS),MSTRG.48546(CYP72A15),MSTRG.4884(OlnB1),MSTRG.49016(MSD1),MSTRG.49916(MVP1),MSTRG.53225(LAX2),MSTRG.56706(At1g75220),MSTRG.65902(dVPE),MSTRG.66202(accB),MSTRG.69887(TUBA2),MSTRG.71454(TERT),MSTRG.74761(VTC2),MSTRG.765…	65	34	MSTRG.13328(--),MSTRG.38682(SCRM),MSTRG.41112(--),MSTRG.41223(At5g40670),MSTRG.49457(PANS2),MSTRG.50494(TSN1),MSTRG.50557(At5g08680),MSTRG.50656(At3g47200),MSTRG.56777(CUL1),MSTRG.63106(CRU4),MSTRG.69461(nmd3),MSTRG.75031(--),MSTRG.80265(EMB2271),MSTRG.87186(EPSIN1),MSTRG.88244(CATHB2),ncbi_106345973(LOC106345973),ncbi_106353011(LOC106353011),ncbi_106356219(LOC106356219),ncbi_106358541(LOC1063585…	MSTRG.28086(PATL1),MSTRG.48546(CYP72A15),MSTRG.59845(HMA5),MSTRG.63460(--),MSTRG.85082(AMC5),ncbi_106347749(LOC106347749),ncbi_106354779(LOC106354779),ncbi_106357035(LOC106357035),ncbi_106365264(LOC106365264),ncbi_106366145(LOC106366145),ncbi_106368095(LOC106368095),ncbi_106368317(LOC106368317),ncbi_106371600(LOC106371600),ncbi_106381519(LOC106381519),ncbi_106384904(LOC106384904),ncbi_106385326(L…
GO:0008150	Biological Process	GO:0051704	multi-organism process	35	31	MSTRG.29116(AFP2),MSTRG.3256(BGLU19),MSTRG.38811(--),MSTRG.53279(PMDH1),MSTRG.64114(BGLU19),MSTRG.92150(IAA26),MSTRG.92787(CP29B),ncbi_106346666(LOC106346666),ncbi_106349146(LOC106349146),ncbi_106353544(LOC106353544),ncbi_106361939(LOC106361939),ncbi_106380891(LOC106380891),ncbi_106381381(LOC106381381),ncbi_106382934(LOC106382934),ncbi_106386368(LOC106386368),ncbi_106387580(LOC106387580),ncbi_106…	MSTRG.10685(PER21),MSTRG.23258(LAX2),MSTRG.35063(At5g46871),MSTRG.41324(ER-ANT1),MSTRG.42030(At5g46871),MSTRG.49016(MSD1),MSTRG.49916(MVP1),MSTRG.53225(LAX2),MSTRG.71207(At1g13609),MSTRG.71346(HDG12),MSTRG.74761(VTC2),ncbi_106345518(LOC106345518),ncbi_106356458(LOC106356458),ncbi_106358259(LOC106358259),ncbi_106368387(LOC106368387),ncbi_106389650(LOC106389650),ncbi_106392416(LOC106392416),ncbi_10…	21	19	MSTRG.13328(--),MSTRG.25421(BGLU3),MSTRG.30274(NAP1,2),MSTRG.42030(At5g46871),MSTRG.80265(EMB2271),MSTRG.80506(WRKY18),MSTRG.8318(At1g58602),ncbi_106357650(LOC106357650),ncbi_106368802(LOC106368802),ncbi_106376872(LOC106376872),ncbi_106381745(LOC106381745),ncbi_106382974(LOC106382974),ncbi_106384930(LOC106384930),ncbi_106386860(LOC106386860),ncbi_106396768(LOC106396768),ncbi_106400805(LOC10640080…	MSTRG.19625(DSC2),MSTRG.35057(At5g46871),MSTRG.8916(LCR81),ncbi_106361385(LOC106361385),ncbi_106364567(BNAA09G24140D),ncbi_106370777(LOC106370777),ncbi_106372124(LOC106372124),ncbi_106380917(LOC106380917),ncbi_106385017(LOC106385017),ncbi_106386078(LOC106386078),ncbi_106393849(LOC106393849),ncbi_106401568(LOC106401568),ncbi_106412179(LOC106412179),ncbi_106416646(LOC106416646),ncbi_106418349(LOC10…
GO:0008150	Biological Process	GO:0065007	biological regulation	66	132	MSTRG.15982(EMB2360),MSTRG.19763(JAL5),MSTRG.21863(CDKF-4),MSTRG.27078(HOS15),MSTRG.28006(CLPB1),MSTRG.29116(AFP2),MSTRG.29117(ARAC5),MSTRG.29257(APXT),MSTRG.3256(BGLU19),MSTRG.45799(--),MSTRG.47887(SRP-54C),MSTRG.48018(NUC),MSTRG.48731(ddx11),MSTRG.48768(SCRM),MSTRG.53279(PMDH1),MSTRG.54705(At2g39360),MSTRG.62349(BZIP17),MSTRG.64114(BGLU19),MSTRG.64291(XCP2),MSTRG.65047(CIPK12),MSTRG.65472(RACK1…	MSTRG.16398(YUC10),MSTRG.18625(LHCB4.3),MSTRG.20735(accB),MSTRG.2126(PORB),MSTRG.23258(LAX2),MSTRG.2486(DXS),MSTRG.27519(GATA8),MSTRG.3474(TDR),MSTRG.34833(MYB101),MSTRG.36291(GATA8),MSTRG.39159(At5g56590),MSTRG.39237(AHA3),MSTRG.43327(DXS),MSTRG.4884(OlnB1),MSTRG.53225(LAX2),MSTRG.53617(XTH9),MSTRG.54642(RPN1A),MSTRG.5951(CKX3),MSTRG.65902(dVPE),MSTRG.66202(accB),MSTRG.66230(SBT1.7),MSTRG.67389(…	58	43	MSTRG.13328(--),MSTRG.23031(--),MSTRG.3369(BHLH87),MSTRG.36775(CAMTA2),MSTRG.38682(SCRM),MSTRG.41112(--),MSTRG.42807(SMC5),MSTRG.44570(RLM1A),MSTRG.48447(XRN3),MSTRG.49457(PANS2),MSTRG.50494(TSN1),MSTRG.56777(CUL1),MSTRG.57869(SRS7),MSTRG.60418(DOF1.3),MSTRG.63106(CRU4),MSTRG.74216(--),MSTRG.75257(FEI2),MSTRG.80506(WRKY18),MSTRG.80737(ANL2),MSTRG.80750(SRS7),MSTRG.86884(HDG11),MSTRG.88244(CATHB2)…	MSTRG.16463(BHLH71),MSTRG.2260(PSAN),MSTRG.27855(--),MSTRG.31069(XTH24),MSTRG.48395(GRF2),MSTRG.70159(SCPL6),MSTRG.75074(XTH24),ncbi_106346033(LOC106346033),ncbi_106347491(LOC106347491),ncbi_106348393(LOC106348393),ncbi_106357116(LOC106357116),ncbi_106359761(LOC106359761),ncbi_106365422(LOC106365422),ncbi_106370777(LOC106370777),ncbi_106374946(LOC106374946),ncbi_106376492(LOC106376492),ncbi_10638…
GO:0008150	Biological Process	GO:0071840	cellular component organization or biogenesis	40	163	MSTRG.15982(EMB2360),MSTRG.16565(TPS09),MSTRG.27078(HOS15),MSTRG.29117(ARAC5),MSTRG.29257(APXT),MSTRG.3256(BGLU19),MSTRG.39445(OVA6),MSTRG.47887(SRP-54C),MSTRG.48731(ddx11),MSTRG.48768(SCRM),MSTRG.49327(SAC1),MSTRG.52380(ACT1),MSTRG.53279(PMDH1),MSTRG.54705(At2g39360),MSTRG.64114(BGLU19),MSTRG.65047(CIPK12),MSTRG.65465(XYLA),MSTRG.65472(RACK1B),MSTRG.68555(SMZ),MSTRG.77539(XTH25),MSTRG.86253(HMGA…	MSTRG.12038(FH11),MSTRG.13549(PDV2),MSTRG.16076(--),MSTRG.39159(At5g56590),MSTRG.39237(AHA3),MSTRG.41404(PGD1),MSTRG.45478(RH46),MSTRG.47725(RPS6),MSTRG.4884(OlnB1),MSTRG.49016(MSD1),MSTRG.49916(MVP1),MSTRG.53225(LAX2),MSTRG.53617(XTH9),MSTRG.54642(RPN1A),MSTRG.55374(TUBB2),MSTRG.59789(HOP2),MSTRG.62136(--),MSTRG.65902(dVPE),MSTRG.69887(TUBA2),MSTRG.70721(UGE4),MSTRG.71346(HDG12),MSTRG.71454(TERT…	53	29	MSTRG.13328(--),MSTRG.16565(TPS09),MSTRG.30274(NAP1,2),MSTRG.38682(SCRM),MSTRG.48447(XRN3),MSTRG.50011(At3g60360),MSTRG.50662(ASP3),MSTRG.50669(ASP3),MSTRG.56777(CUL1),MSTRG.69461(nmd3),MSTRG.75257(FEI2),MSTRG.7724(CPP1),MSTRG.80265(EMB2271),MSTRG.86884(HDG11),MSTRG.88244(CATHB2),MSTRG.92203(RPL28A),ncbi_106363861(LOC106363861),ncbi_106366415(LOC106366415),ncbi_106366762(LOC106366762),ncbi_106368…	MSTRG.27855(--),MSTRG.28086(PATL1),MSTRG.31069(XTH24),MSTRG.65517(POP2),MSTRG.75074(XTH24),MSTRG.85082(AMC5),ncbi_106345717(LOC106345717),ncbi_106346165(LOC106346165),ncbi_106348307(LOC106348307),ncbi_106356614(LOC106356614),ncbi_106377747(LOC106377747),ncbi_106379349(LOC106379349),ncbi_106381060(LOC106381060),ncbi_106383554(LOC106383554),ncbi_106391093(LOC106391093),ncbi_106391848(LOC106391848),…
GO:0008150	Biological Process	GO:0098754	detoxification	2	0	MSTRG.15982(EMB2360),MSTRG.59845(HMA5)	--	0	1	--	MSTRG.59845(HMA5)
