# Supplementary material for: Effects of Low Nighttime Temperature on Fatty Acid Content in Developing Seeds from Brassica napus L. Based on RNA-Seq and Metabolome
Source: Plants (Basel). 2023 Jan 10;12(2):325. doi: 10.3390/plants12020325 (PMC9862530; doi:10.3390/plants12020325)
Supplement: Supplementary file 1 [file plants-12-00325-s001.zip › Table S11.xls]

Table S11 GO functional annotation on OSE13vs.OFE13vs.OTE13.
GO ID (level1)	GO Term (level1)	GO ID (level2)	GO Term (level2)	Gene Number(OFE13-vs-OTE13_up)	Gene Number(OFE13-vs-OTE13_down)	Gene List(OFE13-vs-OTE13_up)	Gene List(OFE13-vs-OTE13_down)	Gene Number(OSE13-vs-OFE13_up)	Gene Number(OSE13-vs-OFE13_down)	Gene List(OSE13-vs-OFE13_up)	Gene List(OSE13-vs-OFE13_down)
GO:0003674	Molecular Function	GO:0000988	transcription factor activity, protein binding	0	0	--	--	0	2	--	MSTRG.15030(MYB3R1),MSTRG.62993(HFR1)
GO:0003674	Molecular Function	GO:0001071	nucleic acid binding transcription factor activity	5	2	MSTRG.38852(NAC002),MSTRG.44622(NAC079),MSTRG.47211(AIL1),MSTRG.47278(MYB54),MSTRG.60418(DOF1.3)	MSTRG.71346(HDG12),ncbi_106366461(LOC106366461)	9	8	MSTRG.16463(BHLH71),MSTRG.38852(NAC002),MSTRG.47211(AIL1),MSTRG.48616(PIF6),MSTRG.55436(NAC062),MSTRG.60418(DOF1.3),MSTRG.71442(PHL2),MSTRG.76394(WRKY25),MSTRG.84652(NAC086)	MSTRG.15030(MYB3R1),MSTRG.31362(BLH2),MSTRG.53060(ARF11),MSTRG.59388(CBP60G),MSTRG.62993(HFR1),MSTRG.68446(IDD5),MSTRG.882(REM4),ncbi_106425775(LOC106425775)
GO:0003674	Molecular Function	GO:0003824	catalytic activity	106	125	MSTRG.10815(PI1),MSTRG.13220(ICL),MSTRG.16565(TPS09),MSTRG.26419(ufaA1),MSTRG.29984(RD21A),MSTRG.3256(BGLU19),MSTRG.35403(PRS2),MSTRG.38808(KCS1),MSTRG.39445(OVA6),MSTRG.41535(--),MSTRG.44024(XTH11),MSTRG.46021(At5g65490),MSTRG.46356(OMT1),MSTRG.53481(BDG3),MSTRG.54705(At2g39360),MSTRG.55200(OFUT39),MSTRG.55536(GAD2),MSTRG.56653(BGLU3),MSTRG.60114(SSL9),MSTRG.62359(At3g50280),MSTRG.64114(BGLU19),…	MSTRG.2126(PORB),MSTRG.2486(DXS),MSTRG.25796(GLC1),MSTRG.26835(LKR/SDH),MSTRG.28113(At1g71691),MSTRG.3474(TDR),MSTRG.34747(HSL1),MSTRG.35132(ALA9),MSTRG.37497(--),MSTRG.48395(GRF2),MSTRG.48546(CYP72A15),MSTRG.49221(TT10),MSTRG.49916(MVP1),MSTRG.49940(ASP4),MSTRG.5123(GH3.15),MSTRG.53617(XTH9),MSTRG.55374(TUBB2),MSTRG.5660(TSO2),MSTRG.60257(At1g29670),MSTRG.65902(dVPE),MSTRG.70721(UGE4),MSTRG.7134…	187	374	MSTRG.10815(PI1),MSTRG.13220(ICL),MSTRG.14149(TPS26),MSTRG.14150(TPS07),MSTRG.14866(SCT),MSTRG.15809(ADPG2),MSTRG.16565(TPS09),MSTRG.16675(MIPS),MSTRG.25421(BGLU3),MSTRG.26419(ufaA1),MSTRG.30828(BGLU3),MSTRG.30967(At4g31860),MSTRG.31164(PXG1),MSTRG.31165(PXG1),MSTRG.3256(BGLU19),MSTRG.33775(BFRUCT3),MSTRG.33776(BFRUCT4),MSTRG.35536(YUC10),MSTRG.38750(BGLU11),MSTRG.39445(OVA6),MSTRG.41680(At5g5767…	MSTRG.12265(UBP13),MSTRG.13032(GAD4),MSTRG.13033(GAD4),MSTRG.17676(--),MSTRG.18640(ULP1D),MSTRG.19898(ABCC4),MSTRG.2126(PORB),MSTRG.21647(CSLE1),MSTRG.22318(ACO3),MSTRG.24099(SRK6),MSTRG.24240(HAM1),MSTRG.25796(GLC1),MSTRG.26335(CLSY4),MSTRG.26835(LKR/SDH),MSTRG.28223(PAT22),MSTRG.28552(XYL1),MSTRG.29356(RHM1),MSTRG.29604(GGAT1),MSTRG.29682(PLDALPHA2),MSTRG.29686(ABA2),MSTRG.31232(HSP70-6),MSTRG.…
GO:0003674	Molecular Function	GO:0004871	signal transducer activity	0	1	--	MSTRG.71997(PBL21)	1	2	ncbi_106431123(LOC106431123)	MSTRG.57457(ERS1),MSTRG.90161(MEKK1)
GO:0003674	Molecular Function	GO:0005198	structural molecule activity	0	1	--	MSTRG.55374(TUBB2)	0	4	--	MSTRG.54232(RPS10),MSTRG.55374(TUBB2),MSTRG.7772(RPL12A),ncbi_106357693(LOC106357693)
GO:0003674	Molecular Function	GO:0005215	transporter activity	9	13	MSTRG.33299(CHX20),MSTRG.40007(--),MSTRG.64079(NHX8),MSTRG.82230(MRS2-1),ncbi_106360260(LOC106360260),ncbi_106400489(LOC106400489),ncbi_106419519(LOC106419519),ncbi_106444421(LOC106444421),ncbi_106454518(LOC106454518)	MSTRG.35132(ALA9),ncbi_106352625(LOC106352625),ncbi_106365603(LOC106365603),ncbi_106371074(LOC106371074),ncbi_106377161(LOC106377161),ncbi_106396451(LOC106396451),ncbi_106400209(LOC106400209),ncbi_106406602(LOC106406602),ncbi_106421334(LOC106421334),ncbi_106429352(LOC106429352),ncbi_106438166(LOC106438166),ncbi_106439261(LOC106439261),ncbi_106450814(LOC106450814)	23	42	MSTRG.24250(SUC1),MSTRG.30262(OEP162),MSTRG.30264(OEP162),MSTRG.39913(DTX25),MSTRG.54957(ABCG5),MSTRG.57372(OXA1L),MSTRG.57458(NDT1),MSTRG.76521(ZIFL2),MSTRG.89982(GLB3),ncbi_106365948(LOC106365948),ncbi_106371074(LOC106371074),ncbi_106376214(LOC106376214),ncbi_106377208(LOC106377208),ncbi_106397154(LOC106397154),ncbi_106400489(LOC106400489),ncbi_106402873(LOC106402873),ncbi_106408374(LOC10640837…	MSTRG.19898(ABCC4),MSTRG.23258(LAX2),MSTRG.39237(AHA3),MSTRG.40380(DIT1),MSTRG.4263(CAT7),MSTRG.43719(VPS45),MSTRG.46866(SFH3),MSTRG.54035(DTX43),MSTRG.56792(VPS45),MSTRG.59845(HMA5),MSTRG.6156(OPT8),MSTRG.70831(--),MSTRG.80560(ABCC4),MSTRG.82519(AHA3),MSTRG.90741(PUMP1),MSTRG.92977(STP8),ncbi_106348621(LOC106348621),ncbi_106348623(LOC106348623),ncbi_106350699(LOC106350699),ncbi_106352625(LOC1063…
GO:0003674	Molecular Function	GO:0005488	binding	245	376	MSTRG.15375(FH7),MSTRG.19763(JAL5),MSTRG.3256(BGLU19),MSTRG.35403(PRS2),MSTRG.38211(At1g50590),MSTRG.39445(OVA6),MSTRG.44327(SDH),MSTRG.46021(At5g65490),MSTRG.46356(OMT1),MSTRG.47278(MYB54),MSTRG.55536(GAD2),MSTRG.59475(scw1),MSTRG.60418(DOF1.3),MSTRG.64114(BGLU19),MSTRG.64292(ABI5),MSTRG.71780(--),MSTRG.80528(CYTC-2),MSTRG.81982(GAD2),MSTRG.83743(CYP86A1),MSTRG.84867(JAL5),MSTRG.86253(HMGA),MSTR…	MSTRG.11098(SPH11),MSTRG.13549(PDV2),MSTRG.2486(DXS),MSTRG.27519(GATA8),MSTRG.34099(LHCA3),MSTRG.3474(TDR),MSTRG.34747(HSL1),MSTRG.35132(ALA9),MSTRG.36291(GATA8),MSTRG.37497(--),MSTRG.48395(GRF2),MSTRG.48546(CYP72A15),MSTRG.49940(ASP4),MSTRG.50497(OlnB1),MSTRG.53003(ZPR1),MSTRG.55374(TUBB2),MSTRG.5660(TSO2),MSTRG.70721(UGE4),MSTRG.71346(HDG12),MSTRG.71997(PBL21),MSTRG.72133(DDM1),MSTRG.76570(HSP9…	402	888	MSTRG.15847(UBA2A),MSTRG.16463(BHLH71),MSTRG.16675(MIPS),MSTRG.19763(JAL5),MSTRG.31141(NAPB),MSTRG.31164(PXG1),MSTRG.31165(PXG1),MSTRG.3256(BGLU19),MSTRG.33660(AGD8),MSTRG.34716(SCL30A),MSTRG.35536(YUC10),MSTRG.39445(OVA6),MSTRG.41680(At5g57670),MSTRG.48616(PIF6),MSTRG.48731(ddx11),MSTRG.4884(OlnB1),MSTRG.53967(NUP98B),MSTRG.53997(--),MSTRG.54957(ABCG5),MSTRG.55436(NAC062),MSTRG.55536(GAD2),MSTRG…	MSTRG.1133(At4g18593),MSTRG.13032(GAD4),MSTRG.13033(GAD4),MSTRG.14893(VLN4),MSTRG.15030(MYB3R1),MSTRG.18452(--),MSTRG.19898(ABCC4),MSTRG.22318(ACO3),MSTRG.23006(--),MSTRG.24099(SRK6),MSTRG.24240(HAM1),MSTRG.25150(SMC4),MSTRG.25151(SMC4),MSTRG.26335(CLSY4),MSTRG.27511(H2AV),MSTRG.27519(GATA8),MSTRG.28086(PATL1),MSTRG.28552(XYL1),MSTRG.29356(RHM1),MSTRG.29604(GGAT1),MSTRG.29682(PLDALPHA2),MSTRG.312…
GO:0003674	Molecular Function	GO:0060089	molecular transducer activity	0	2	--	ncbi_106358362(LOC106358362),ncbi_111197924(LOC111197924)	5	2	ncbi_106387397(LOC106387397),ncbi_106395049(LOC106395049),ncbi_106418163(LOC106418163),ncbi_106431123(LOC106431123),ncbi_106440577(LOC106440577)	ncbi_106358362(LOC106358362),ncbi_106420273(LOC106420273)
GO:0003674	Molecular Function	GO:0098772	molecular function regulator	2	1	MSTRG.10815(PI1),ncbi_111215388(LOC111215388)	ncbi_106354203(LOC106354203)	10	6	MSTRG.10815(PI1),MSTRG.43360(CYS4),MSTRG.60535(SC35),ncbi_106356341(LOC106356341),ncbi_106392423(LOC106392423),ncbi_106394983(LOC106394983),ncbi_106396330(LOC106396330),ncbi_106423941(LOC106423941),ncbi_106423943(LOC106423943),ncbi_111215388(LOC111215388)	MSTRG.82911(TON2),ncbi_106354272(LOC106354272),ncbi_106400441(LOC106400441),ncbi_106416764(LOC106416764),ncbi_106432930(LOC106432930),ncbi_106454545(LOC106454545)
GO:0005575	Cellular Component	GO:0005576	extracellular region	4	10	MSTRG.44024(XTH11),MSTRG.77539(XTH25),ncbi_106365738(LOC106365738),ncbi_106391157(LOC106391157)	MSTRG.49221(TT10),MSTRG.49916(MVP1),MSTRG.53617(XTH9),MSTRG.60257(At1g29670),MSTRG.65902(dVPE),MSTRG.75074(XTH24),MSTRG.76570(HSP90-7),MSTRG.79709(AXS2),ncbi_106390494(LOC106390494),ncbi_106429522(LOC106429522)	3	16	MSTRG.30059(SKS1),MSTRG.60257(At1g29670),MSTRG.78602(CPN60A1)	MSTRG.28086(PATL1),MSTRG.28552(XYL1),MSTRG.29604(GGAT1),MSTRG.42335(XTH29),MSTRG.65902(dVPE),MSTRG.70781(dVPE),MSTRG.74842(--),MSTRG.75074(XTH24),MSTRG.78142(PURA),MSTRG.79709(AXS2),MSTRG.89448(ANNAT7),ncbi_106380181(LOC106380181),ncbi_106390494(LOC106390494),ncbi_106401654(LOC106401654),ncbi_106429522(LOC106429522),ncbi_106447315(LOC106447315)
GO:0005575	Cellular Component	GO:0005623	cell	322	408	MSTRG.10815(PI1),MSTRG.13220(ICL),MSTRG.15375(FH7),MSTRG.16565(TPS09),MSTRG.19762(F-ATMBP),MSTRG.19763(JAL5),MSTRG.29116(AFP2),MSTRG.29984(RD21A),MSTRG.3256(BGLU19),MSTRG.33299(CHX20),MSTRG.35403(PRS2),MSTRG.38211(At1g50590),MSTRG.38808(KCS1),MSTRG.38852(NAC002),MSTRG.39445(OVA6),MSTRG.43809(--),MSTRG.44327(SDH),MSTRG.44622(NAC079),MSTRG.45506(RAB28),MSTRG.46021(At5g65490),MSTRG.46356(OMT1),MSTRG…	MSTRG.11098(SPH11),MSTRG.13549(PDV2),MSTRG.2126(PORB),MSTRG.2486(DXS),MSTRG.25796(GLC1),MSTRG.26835(LKR/SDH),MSTRG.27519(GATA8),MSTRG.34099(LHCA3),MSTRG.34747(HSL1),MSTRG.35132(ALA9),MSTRG.36291(GATA8),MSTRG.37497(--),MSTRG.44595(CPK32),MSTRG.48395(GRF2),MSTRG.48546(CYP72A15),MSTRG.49916(MVP1),MSTRG.49940(ASP4),MSTRG.50497(OlnB1),MSTRG.5123(GH3.15),MSTRG.53617(XTH9),MSTRG.55374(TUBB2),MSTRG.5660(…	624	1127	MSTRG.10815(PI1),MSTRG.13220(ICL),MSTRG.14003(At4g09580),MSTRG.14148(TPS07),MSTRG.14149(TPS26),MSTRG.14150(TPS07),MSTRG.15809(ADPG2),MSTRG.15847(UBA2A),MSTRG.16463(BHLH71),MSTRG.16565(TPS09),MSTRG.16675(MIPS),MSTRG.19762(F-ATMBP),MSTRG.19763(JAL5),MSTRG.20017(At3g58980),MSTRG.24250(SUC1),MSTRG.25421(BGLU3),MSTRG.27235(PHB1),MSTRG.30059(SKS1),MSTRG.30262(OEP162),MSTRG.30264(OEP162),MSTRG.30828(BGL…	MSTRG.10986(--),MSTRG.12265(UBP13),MSTRG.13032(GAD4),MSTRG.13033(GAD4),MSTRG.14893(VLN4),MSTRG.15030(MYB3R1),MSTRG.18452(--),MSTRG.18640(ULP1D),MSTRG.20883(--),MSTRG.2126(PORB),MSTRG.22318(ACO3),MSTRG.23006(--),MSTRG.23167(IQD32),MSTRG.24099(SRK6),MSTRG.24240(HAM1),MSTRG.24241(--),MSTRG.25150(SMC4),MSTRG.25151(SMC4),MSTRG.25796(GLC1),MSTRG.26335(CLSY4),MSTRG.26806(SNL3),MSTRG.26835(LKR/SDH),MSTRG…
GO:0005575	Cellular Component	GO:0016020	membrane	78	86	MSTRG.15375(FH7),MSTRG.33299(CHX20),MSTRG.38808(KCS1),MSTRG.40007(--),MSTRG.41112(--),MSTRG.44327(SDH),MSTRG.46356(OMT1),MSTRG.54684(IQD1),MSTRG.54705(At2g39360),MSTRG.59840(TPLATE),MSTRG.62239(--),MSTRG.64079(NHX8),MSTRG.80528(CYTC-2),MSTRG.82230(MRS2-1),MSTRG.83743(CYP86A1),ncbi_106346936(LOC106346936),ncbi_106348137(LOC106348137),ncbi_106348631(LOC106348631),ncbi_106348845(LOC106348845),ncbi_1…	MSTRG.13549(PDV2),MSTRG.2126(PORB),MSTRG.34099(LHCA3),MSTRG.3474(TDR),MSTRG.35132(ALA9),MSTRG.48395(GRF2),MSTRG.48546(CYP72A15),MSTRG.49916(MVP1),MSTRG.49940(ASP4),MSTRG.50497(OlnB1),MSTRG.55374(TUBB2),MSTRG.5660(TSO2),MSTRG.60884(RF45),MSTRG.75074(XTH24),MSTRG.76570(HSP90-7),MSTRG.79360(FUT6),MSTRG.91301(At4g15430),MSTRG.92622(WNK9),ncbi_106345745(LOC106345745),ncbi_106347834(LOC106347834),ncbi_…	145	184	MSTRG.1936(NPF5.2),MSTRG.1937(NPF5.2),MSTRG.24250(SUC1),MSTRG.27235(PHB1),MSTRG.30059(SKS1),MSTRG.30262(OEP162),MSTRG.30264(OEP162),MSTRG.30967(At4g31860),MSTRG.31164(PXG1),MSTRG.31165(PXG1),MSTRG.39913(DTX25),MSTRG.41680(At5g57670),MSTRG.4884(OlnB1),MSTRG.52273(PRA1B3),MSTRG.53967(NUP98B),MSTRG.54705(At2g39360),MSTRG.54957(ABCG5),MSTRG.55436(NAC062),MSTRG.55572(NPF2.3),MSTRG.57372(OXA1L),MSTRG.5…	MSTRG.18452(--),MSTRG.19898(ABCC4),MSTRG.2126(PORB),MSTRG.23167(IQD32),MSTRG.23258(LAX2),MSTRG.24099(SRK6),MSTRG.28086(PATL1),MSTRG.28223(PAT22),MSTRG.29682(PLDALPHA2),MSTRG.29939(--),MSTRG.32427(DRP2A),MSTRG.34997(PAHX),MSTRG.38654(ACT5),MSTRG.39237(AHA3),MSTRG.40380(DIT1),MSTRG.4263(CAT7),MSTRG.43719(VPS45),MSTRG.52187(BIP2),MSTRG.53167(OTU11),MSTRG.53722(MGP4),MSTRG.54035(DTX43),MSTRG.55374(TU…
GO:0005575	Cellular Component	GO:0019012	virion	1	0	MSTRG.58334(PRP31)	--	0	0	--	--
GO:0005575	Cellular Component	GO:0030054	cell junction	17	7	MSTRG.15375(FH7),MSTRG.16565(TPS09),MSTRG.19763(JAL5),MSTRG.3256(BGLU19),MSTRG.44327(SDH),MSTRG.46356(OMT1),MSTRG.59840(TPLATE),MSTRG.64114(BGLU19),MSTRG.84867(JAL5),ncbi_106395796(LOC106395796),ncbi_106400248(BNAA07G10370D),ncbi_106424400(LOC106424400),ncbi_106429759(LOC106429759),ncbi_106431905(LOC106431905),ncbi_106433462(LOC106433462),ncbi_106436105(LOC106436105),ncbi_111212575(LOC111212575)	MSTRG.25796(GLC1),MSTRG.49916(MVP1),MSTRG.49940(ASP4),MSTRG.55374(TUBB2),MSTRG.76570(HSP90-7),ncbi_106389412(LOC106389412),ncbi_111204573(LOC111204573)	25	39	MSTRG.14148(TPS07),MSTRG.14149(TPS26),MSTRG.16565(TPS09),MSTRG.19763(JAL5),MSTRG.24250(SUC1),MSTRG.30059(SKS1),MSTRG.3256(BGLU19),MSTRG.56456(TPS26),MSTRG.57928(BGLU29),MSTRG.64114(BGLU19),MSTRG.66593(CESA3),MSTRG.74372(TPS07),MSTRG.84867(JAL5),MSTRG.90968(--),ncbi_106352587(LOC106352587),ncbi_106353232(LOC106353232),ncbi_106385837(LOC106385837),ncbi_106389282(LOC106389282),ncbi_106395796(LOC1063…	MSTRG.12265(UBP13),MSTRG.20883(--),MSTRG.24099(SRK6),MSTRG.25796(GLC1),MSTRG.28086(PATL1),MSTRG.28552(XYL1),MSTRG.29356(RHM1),MSTRG.29682(PLDALPHA2),MSTRG.32427(DRP2A),MSTRG.38654(ACT5),MSTRG.39237(AHA3),MSTRG.48917(JAL35),MSTRG.52187(BIP2),MSTRG.53060(ARF11),MSTRG.55374(TUBB2),MSTRG.62295(JAL23),MSTRG.6240(EXO70A1),MSTRG.65542(--),MSTRG.82519(AHA3),MSTRG.83834(RBL1),MSTRG.90622(PDCB2),MSTRG.9074…
GO:0005575	Cellular Component	GO:0031012	extracellular matrix	0	1	--	ncbi_106366447(LOC106366447)	2	3	MSTRG.4884(OlnB1),MSTRG.77100(OlnB6)	ncbi_106419374(LOC106419374),ncbi_106448287(LOC106448287),ncbi_111211050(LOC111211050)
GO:0005575	Cellular Component	GO:0031974	membrane-enclosed lumen	1	2	MSTRG.80528(CYTC-2)	ncbi_106367820(LOC106367820),ncbi_106414352(LOC106414352)	3	16	MSTRG.34716(SCL30A),MSTRG.47909(--),ncbi_106351054(LOC106351054)	ncbi_106358257(LOC106358257),ncbi_106361889(LOC106361889),ncbi_106362246(LOC106362246),ncbi_106372028(LOC106372028),ncbi_106376195(LOC106376195),ncbi_106390266(LOC106390266),ncbi_106397681(LOC106397681),ncbi_106409227(LOC106409227),ncbi_106413971(LOC106413971),ncbi_106417705(LOC106417705),ncbi_106419027(LOC106419027),ncbi_106420089(LOC106420089),ncbi_106443722(LOC106443722),ncbi_106445837(LOC1064…
GO:0005575	Cellular Component	GO:0032991	macromolecular complex	8	24	MSTRG.38808(KCS1),MSTRG.58334(PRP31),MSTRG.86253(HMGA),MSTRG.92787(CP29B),ncbi_106371565(LOC106371565),ncbi_106426086(LOC106426086),ncbi_106430597(LOC106430597),ncbi_106450446(LOC106450446)	MSTRG.34099(LHCA3),MSTRG.49916(MVP1),MSTRG.55374(TUBB2),MSTRG.72133(DDM1),ncbi_106353683(LOC106353683),ncbi_106354025(LOC106354025),ncbi_106365133(LOC106365133),ncbi_106367635(LOC106367635),ncbi_106376473(LOC106376473),ncbi_106382780(LOC106382780),ncbi_106382783(LOC106382783),ncbi_106384921(LOC106384921),ncbi_106389287(BNAA03G35660D),ncbi_106389316(BNAC03G41500D),ncbi_106391224(LOC106391224),ncbi…	13	86	MSTRG.53967(NUP98B),MSTRG.57458(NDT1),MSTRG.65465(XYLA),MSTRG.6777(ASK4),MSTRG.78602(CPN60A1),ncbi_106361349(LOC106361349),ncbi_106367269(LOC106367269),ncbi_106388358(LOC106388358),ncbi_106407582(LOC106407582),ncbi_106407676(LOC106407676),ncbi_106425283(LOC106425283),ncbi_106430215(LOC106430215),ncbi_106438274(LOC106438274)	MSTRG.10986(--),MSTRG.23167(IQD32),MSTRG.4214(--),MSTRG.48949(CHR17),MSTRG.52187(BIP2),MSTRG.54232(RPS10),MSTRG.55374(TUBB2),MSTRG.6240(EXO70A1),MSTRG.72133(DDM1),MSTRG.7772(RPL12A),MSTRG.92636(--),ncbi_106345831(LOC106345831),ncbi_106349409(LOC106349409),ncbi_106353683(LOC106353683),ncbi_106354025(LOC106354025),ncbi_106356008(LOC106356008),ncbi_106361773(LOC106361773),ncbi_106362246(LOC106362246…
GO:0005575	Cellular Component	GO:0043226	organelle	267	316	MSTRG.13220(ICL),MSTRG.15375(FH7),MSTRG.16565(TPS09),MSTRG.19762(F-ATMBP),MSTRG.19763(JAL5),MSTRG.29984(RD21A),MSTRG.3256(BGLU19),MSTRG.33299(CHX20),MSTRG.35403(PRS2),MSTRG.38211(At1g50590),MSTRG.38808(KCS1),MSTRG.38852(NAC002),MSTRG.39445(OVA6),MSTRG.43809(--),MSTRG.44327(SDH),MSTRG.44622(NAC079),MSTRG.46021(At5g65490),MSTRG.46356(OMT1),MSTRG.47211(AIL1),MSTRG.47278(MYB54),MSTRG.52799(PCMP-H29),…	MSTRG.11098(SPH11),MSTRG.13549(PDV2),MSTRG.2126(PORB),MSTRG.2486(DXS),MSTRG.27519(GATA8),MSTRG.34099(LHCA3),MSTRG.35132(ALA9),MSTRG.36291(GATA8),MSTRG.37497(--),MSTRG.44595(CPK32),MSTRG.48395(GRF2),MSTRG.48546(CYP72A15),MSTRG.49916(MVP1),MSTRG.49940(ASP4),MSTRG.50497(OlnB1),MSTRG.5123(GH3.15),MSTRG.55374(TUBB2),MSTRG.5660(TSO2),MSTRG.60257(At1g29670),MSTRG.63863(GSTT3),MSTRG.65902(dVPE),MSTRG.707…	500	811	MSTRG.13220(ICL),MSTRG.14003(At4g09580),MSTRG.14148(TPS07),MSTRG.14149(TPS26),MSTRG.14150(TPS07),MSTRG.15847(UBA2A),MSTRG.16463(BHLH71),MSTRG.16565(TPS09),MSTRG.16675(MIPS),MSTRG.19762(F-ATMBP),MSTRG.19763(JAL5),MSTRG.20017(At3g58980),MSTRG.24250(SUC1),MSTRG.25421(BGLU3),MSTRG.27235(PHB1),MSTRG.30059(SKS1),MSTRG.30262(OEP162),MSTRG.30264(OEP162),MSTRG.30828(BGLU3),MSTRG.31164(PXG1),MSTRG.31165(PX…	MSTRG.10986(--),MSTRG.12265(UBP13),MSTRG.13032(GAD4),MSTRG.13033(GAD4),MSTRG.14893(VLN4),MSTRG.15030(MYB3R1),MSTRG.18452(--),MSTRG.18640(ULP1D),MSTRG.20883(--),MSTRG.2126(PORB),MSTRG.23006(--),MSTRG.23167(IQD32),MSTRG.24099(SRK6),MSTRG.24240(HAM1),MSTRG.24241(--),MSTRG.25150(SMC4),MSTRG.25151(SMC4),MSTRG.26335(CLSY4),MSTRG.26806(SNL3),MSTRG.27511(H2AV),MSTRG.27519(GATA8),MSTRG.28086(PATL1),MSTRG.…
GO:0005575	Cellular Component	GO:0044420	extracellular matrix component	0	0	--	--	2	2	MSTRG.4884(OlnB1),MSTRG.77100(OlnB6)	ncbi_106419374(LOC106419374),ncbi_106448287(LOC106448287)
GO:0005575	Cellular Component	GO:0044421	extracellular region part	1	1	ncbi_106365738(LOC106365738)	MSTRG.65902(dVPE)	0	5	--	MSTRG.65902(dVPE),MSTRG.70781(dVPE),ncbi_106380181(LOC106380181),ncbi_106401654(LOC106401654),ncbi_106447315(LOC106447315)
GO:0005575	Cellular Component	GO:0044422	organelle part	24	76	MSTRG.3256(BGLU19),MSTRG.39445(OVA6),MSTRG.44327(SDH),MSTRG.58334(PRP31),MSTRG.64114(BGLU19),MSTRG.80528(CYTC-2),MSTRG.86253(HMGA),MSTRG.92787(CP29B),ncbi_106365163(LOC106365163),ncbi_106367033(LOC106367033),ncbi_106376908(LOC106376908),ncbi_106388574(LOC106388574),ncbi_106397752(LOC106397752),ncbi_106402901(LOC106402901),ncbi_106407619(LOC106407619),ncbi_106414291(LOC106414291),ncbi_106421007(LO…	MSTRG.13549(PDV2),MSTRG.2126(PORB),MSTRG.2486(DXS),MSTRG.34099(LHCA3),MSTRG.35132(ALA9),MSTRG.48395(GRF2),MSTRG.49916(MVP1),MSTRG.49940(ASP4),MSTRG.60257(At1g29670),MSTRG.71997(PBL21),MSTRG.72133(DDM1),MSTRG.76570(HSP90-7),MSTRG.79360(FUT6),MSTRG.83074(--),ncbi_106346066(LOC106346066),ncbi_106346624(LOC106346624),ncbi_106347375(LOC106347375),ncbi_106347376(LOC106347376),ncbi_106348604(BNAC07G1447…	63	178	MSTRG.27235(PHB1),MSTRG.30059(SKS1),MSTRG.30262(OEP162),MSTRG.30264(OEP162),MSTRG.31164(PXG1),MSTRG.31165(PXG1),MSTRG.3256(BGLU19),MSTRG.34716(SCL30A),MSTRG.39445(OVA6),MSTRG.47909(--),MSTRG.52273(PRA1B3),MSTRG.57372(OXA1L),MSTRG.57458(NDT1),MSTRG.58974(BCAT6),MSTRG.59831(At1g63010),MSTRG.60257(At1g29670),MSTRG.61215(REM15.15),MSTRG.64114(BGLU19),MSTRG.65465(XYLA),MSTRG.66593(CESA3),MSTRG.72805(-…	MSTRG.10986(--),MSTRG.18452(--),MSTRG.2126(PORB),MSTRG.23167(IQD32),MSTRG.31232(HSP70-6),MSTRG.32427(DRP2A),MSTRG.38654(ACT5),MSTRG.39237(AHA3),MSTRG.40380(DIT1),MSTRG.4214(--),MSTRG.4263(CAT7),MSTRG.43719(VPS45),MSTRG.45130(--),MSTRG.47505(MAM3),MSTRG.48949(CHR17),MSTRG.49357(OVA2),MSTRG.52187(BIP2),MSTRG.54232(RPS10),MSTRG.56792(VPS45),MSTRG.57457(ERS1),MSTRG.58575(--),MSTRG.72133(DDM1),MSTRG.7…
GO:0005575	Cellular Component	GO:0044423	virion part	1	0	MSTRG.58334(PRP31)	--	0	0	--	--
GO:0005575	Cellular Component	GO:0044425	membrane part	51	47	MSTRG.33299(CHX20),MSTRG.38808(KCS1),MSTRG.40007(--),MSTRG.64079(NHX8),MSTRG.80528(CYTC-2),MSTRG.83743(CYP86A1),ncbi_106346936(LOC106346936),ncbi_106348845(LOC106348845),ncbi_106352850(LOC106352850),ncbi_106354179(LOC106354179),ncbi_106356828(LOC106356828),ncbi_106357013(LOC106357013),ncbi_106358043(LOC106358043),ncbi_106358408(LOC106358408),ncbi_106364765(LOC106364765),ncbi_106365163(LOC10636516…	MSTRG.13549(PDV2),MSTRG.34099(LHCA3),MSTRG.3474(TDR),MSTRG.48546(CYP72A15),MSTRG.50497(OlnB1),MSTRG.5660(TSO2),MSTRG.79360(FUT6),ncbi_106350973(LOC106350973),ncbi_106356378(LOC106356378),ncbi_106358445(LOC106358445),ncbi_106361985(LOC106361985),ncbi_106364153(LOC106364153),ncbi_106366486(LOC106366486),ncbi_106366544(LOC106366544),ncbi_106366592(LOC106366592),ncbi_106367342(LOC106367342),ncbi_1063…	97	91	MSTRG.1936(NPF5.2),MSTRG.1937(NPF5.2),MSTRG.24250(SUC1),MSTRG.27235(PHB1),MSTRG.30059(SKS1),MSTRG.30262(OEP162),MSTRG.30264(OEP162),MSTRG.31164(PXG1),MSTRG.31165(PXG1),MSTRG.4884(OlnB1),MSTRG.52273(PRA1B3),MSTRG.53967(NUP98B),MSTRG.54957(ABCG5),MSTRG.55572(NPF2.3),MSTRG.57372(OXA1L),MSTRG.59831(At1g63010),MSTRG.65423(--),MSTRG.65465(XYLA),MSTRG.66593(CESA3),MSTRG.75377(CHI),MSTRG.76521(ZIFL2),MST…	MSTRG.18452(--),MSTRG.19898(ABCC4),MSTRG.24099(SRK6),MSTRG.28086(PATL1),MSTRG.39237(AHA3),MSTRG.40380(DIT1),MSTRG.4263(CAT7),MSTRG.53722(MGP4),MSTRG.54035(DTX43),MSTRG.57004(RDL3),MSTRG.57457(ERS1),MSTRG.58575(--),MSTRG.59845(HMA5),MSTRG.6156(OPT8),MSTRG.68106(At2g39360),MSTRG.72005(GONST3),MSTRG.74842(--),MSTRG.80560(ABCC4),MSTRG.82519(AHA3),MSTRG.82527(--),MSTRG.83834(RBL1),MSTRG.90622(PDCB2),M…
GO:0005575	Cellular Component	GO:0044464	cell part	322	408	MSTRG.10815(PI1),MSTRG.13220(ICL),MSTRG.15375(FH7),MSTRG.16565(TPS09),MSTRG.19762(F-ATMBP),MSTRG.19763(JAL5),MSTRG.29116(AFP2),MSTRG.29984(RD21A),MSTRG.3256(BGLU19),MSTRG.33299(CHX20),MSTRG.35403(PRS2),MSTRG.38211(At1g50590),MSTRG.38808(KCS1),MSTRG.38852(NAC002),MSTRG.39445(OVA6),MSTRG.43809(--),MSTRG.44327(SDH),MSTRG.44622(NAC079),MSTRG.45506(RAB28),MSTRG.46021(At5g65490),MSTRG.46356(OMT1),MSTRG…	MSTRG.11098(SPH11),MSTRG.13549(PDV2),MSTRG.2126(PORB),MSTRG.2486(DXS),MSTRG.25796(GLC1),MSTRG.26835(LKR/SDH),MSTRG.27519(GATA8),MSTRG.34099(LHCA3),MSTRG.34747(HSL1),MSTRG.35132(ALA9),MSTRG.36291(GATA8),MSTRG.37497(--),MSTRG.44595(CPK32),MSTRG.48395(GRF2),MSTRG.48546(CYP72A15),MSTRG.49916(MVP1),MSTRG.49940(ASP4),MSTRG.50497(OlnB1),MSTRG.5123(GH3.15),MSTRG.53617(XTH9),MSTRG.55374(TUBB2),MSTRG.5660(…	624	1123	MSTRG.10815(PI1),MSTRG.13220(ICL),MSTRG.14003(At4g09580),MSTRG.14148(TPS07),MSTRG.14149(TPS26),MSTRG.14150(TPS07),MSTRG.15809(ADPG2),MSTRG.15847(UBA2A),MSTRG.16463(BHLH71),MSTRG.16565(TPS09),MSTRG.16675(MIPS),MSTRG.19762(F-ATMBP),MSTRG.19763(JAL5),MSTRG.20017(At3g58980),MSTRG.24250(SUC1),MSTRG.25421(BGLU3),MSTRG.27235(PHB1),MSTRG.30059(SKS1),MSTRG.30262(OEP162),MSTRG.30264(OEP162),MSTRG.30828(BGL…	MSTRG.10986(--),MSTRG.12265(UBP13),MSTRG.13032(GAD4),MSTRG.13033(GAD4),MSTRG.14893(VLN4),MSTRG.15030(MYB3R1),MSTRG.18452(--),MSTRG.18640(ULP1D),MSTRG.20883(--),MSTRG.2126(PORB),MSTRG.22318(ACO3),MSTRG.23006(--),MSTRG.23167(IQD32),MSTRG.24099(SRK6),MSTRG.24240(HAM1),MSTRG.24241(--),MSTRG.25150(SMC4),MSTRG.25151(SMC4),MSTRG.25796(GLC1),MSTRG.26335(CLSY4),MSTRG.26806(SNL3),MSTRG.26835(LKR/SDH),MSTRG…
GO:0005575	Cellular Component	GO:0099512	supramolecular fiber	0	3	--	ncbi_106361879(LOC106361879),ncbi_106401933(LOC106401933),ncbi_111199790(LOC111199790)	1	0	MSTRG.81239(MAP70.3)	--
GO:0008150	Biological Process	GO:0000003	reproduction	43	37	MSTRG.13220(ICL),MSTRG.19762(F-ATMBP),MSTRG.3256(BGLU19),MSTRG.39445(OVA6),MSTRG.45506(RAB28),MSTRG.49978(ECP63),MSTRG.58334(PRP31),MSTRG.63105(CRU4),MSTRG.64114(BGLU19),MSTRG.64292(ABI5),ncbi_106345698(LOC106345698),ncbi_106360478(LOC106360478),ncbi_106368491(LOC106368491),ncbi_106375563(LOC106375563),ncbi_106382447(LOC106382447),ncbi_106384310(LOC106384310),ncbi_106389124(LOC106389124),ncbi_106…	MSTRG.11098(SPH11),MSTRG.26835(LKR/SDH),MSTRG.3474(TDR),MSTRG.34747(HSL1),MSTRG.44595(CPK32),MSTRG.48395(GRF2),MSTRG.50497(OlnB1),MSTRG.65902(dVPE),MSTRG.73566(RH50),MSTRG.81231(MAP1A),ncbi_106347204(LOC106347204),ncbi_106349446(LOC106349446),ncbi_106352904(LOC106352904),ncbi_106358132(LOC106358132),ncbi_106360716(LOC106360716),ncbi_106361259(LOC106361259),ncbi_106367461(LOC106367461),ncbi_106382…	88	107	MSTRG.13220(ICL),MSTRG.15809(ADPG2),MSTRG.16675(MIPS),MSTRG.19762(F-ATMBP),MSTRG.24250(SUC1),MSTRG.27235(PHB1),MSTRG.31164(PXG1),MSTRG.31165(PXG1),MSTRG.3256(BGLU19),MSTRG.39445(OVA6),MSTRG.45506(RAB28),MSTRG.48731(ddx11),MSTRG.4884(OlnB1),MSTRG.49978(ECP63),MSTRG.56076(ICL),MSTRG.57458(NDT1),MSTRG.63105(CRU4),MSTRG.63106(CRU4),MSTRG.64114(BGLU19),MSTRG.67100(At2g46260),MSTRG.67520(RNF217),MSTRG.…	MSTRG.18640(ULP1D),MSTRG.24099(SRK6),MSTRG.25150(SMC4),MSTRG.25151(SMC4),MSTRG.26835(LKR/SDH),MSTRG.31232(HSP70-6),MSTRG.31856(TWN2),MSTRG.34747(HSL1),MSTRG.46866(SFH3),MSTRG.48917(JAL35),MSTRG.48949(CHR17),MSTRG.49357(OVA2),MSTRG.50625(--),MSTRG.53774(At4g01160),MSTRG.54766(--),MSTRG.56127(KIN10A),MSTRG.6156(OPT8),MSTRG.65223(At5g27750),MSTRG.65902(dVPE),MSTRG.70781(dVPE),MSTRG.73314(At1g51370),…
GO:0008150	Biological Process	GO:0001906	cell killing	1	2	MSTRG.29116(AFP2)	MSTRG.35057(At5g46871),MSTRG.35063(At5g46871)	0	0	--	--
GO:0008150	Biological Process	GO:0002376	immune system process	9	12	MSTRG.15375(FH7),MSTRG.3256(BGLU19),MSTRG.64114(BGLU19),MSTRG.65157(--),MSTRG.92787(CP29B),ncbi_106348119(LOC106348119),ncbi_106372466(LOC106372466),ncbi_106431862(LOC106431862),ncbi_106435321(LOC106435321)	MSTRG.20291(DRB3),MSTRG.60257(At1g29670),MSTRG.71346(HDG12),MSTRG.91828(MES19),ncbi_106377486(LOC106377486),ncbi_106400714(LOC106400714),ncbi_106415693(LOC106415693),ncbi_106415745(LOC106415745),ncbi_106439324(LOC106439324),ncbi_106439876(LOC106439876),ncbi_106444117(LOC106444117),ncbi_111210737(LOC111210737)	15	17	MSTRG.16675(MIPS),MSTRG.26707(--),MSTRG.3256(BGLU19),MSTRG.35603(EXO84C),MSTRG.55436(NAC062),MSTRG.60257(At1g29670),MSTRG.64114(BGLU19),ncbi_106347437(LOC106347437),ncbi_106348119(LOC106348119),ncbi_106360449(LOC106360449),ncbi_106383209(LOC106383209),ncbi_106407286(LOC106407286),ncbi_106416656(LOC106416656),ncbi_106430771(LOC106430771),ncbi_106431862(LOC106431862)	MSTRG.25150(SMC4),MSTRG.25151(SMC4),MSTRG.26335(CLSY4),MSTRG.59388(CBP60G),MSTRG.67395(PBL1),MSTRG.67468(LOL1),MSTRG.73771(CLSY4),MSTRG.75496(AAO),ncbi_106352880(LOC106352880),ncbi_106389844(LOC106389844),ncbi_106391506(LOC106391506),ncbi_106396414(LOC106396414),ncbi_106415693(LOC106415693),ncbi_106439595(LOC106439595),ncbi_106439671(LOC106439671),ncbi_106452363(LOC106452363),ncbi_111197903(LOC11…
GO:0008150	Biological Process	GO:0008152	metabolic process	213	264	MSTRG.10815(PI1),MSTRG.13220(ICL),MSTRG.15375(FH7),MSTRG.16565(TPS09),MSTRG.19763(JAL5),MSTRG.26419(ufaA1),MSTRG.29116(AFP2),MSTRG.29984(RD21A),MSTRG.3256(BGLU19),MSTRG.35403(PRS2),MSTRG.38808(KCS1),MSTRG.38852(NAC002),MSTRG.39445(OVA6),MSTRG.40007(--),MSTRG.41112(--),MSTRG.44024(XTH11),MSTRG.44327(SDH),MSTRG.44622(NAC079),MSTRG.45506(RAB28),MSTRG.46021(At5g65490),MSTRG.46356(OMT1),MSTRG.47211(AI…	MSTRG.11098(SPH11),MSTRG.20291(DRB3),MSTRG.2126(PORB),MSTRG.2486(DXS),MSTRG.26835(LKR/SDH),MSTRG.27519(GATA8),MSTRG.28113(At1g71691),MSTRG.34099(LHCA3),MSTRG.3474(TDR),MSTRG.34747(HSL1),MSTRG.36291(GATA8),MSTRG.37497(--),MSTRG.44595(CPK32),MSTRG.48395(GRF2),MSTRG.48546(CYP72A15),MSTRG.49221(TT10),MSTRG.49222(TT10),MSTRG.49916(MVP1),MSTRG.49940(ASP4),MSTRG.5123(GH3.15),MSTRG.53617(XTH9),MSTRG.5537…	381	646	MSTRG.10815(PI1),MSTRG.13220(ICL),MSTRG.14003(At4g09580),MSTRG.14148(TPS07),MSTRG.14149(TPS26),MSTRG.14150(TPS07),MSTRG.14866(SCT),MSTRG.15809(ADPG2),MSTRG.15847(UBA2A),MSTRG.16463(BHLH71),MSTRG.16565(TPS09),MSTRG.16675(MIPS),MSTRG.19763(JAL5),MSTRG.25421(BGLU3),MSTRG.26419(ufaA1),MSTRG.27235(PHB1),MSTRG.30059(SKS1),MSTRG.30828(BGLU3),MSTRG.30967(At4g31860),MSTRG.31164(PXG1),MSTRG.31165(PXG1),MST…	MSTRG.10986(--),MSTRG.12265(UBP13),MSTRG.13032(GAD4),MSTRG.13033(GAD4),MSTRG.15030(MYB3R1),MSTRG.17676(--),MSTRG.18452(--),MSTRG.18640(ULP1D),MSTRG.19898(ABCC4),MSTRG.2126(PORB),MSTRG.22318(ACO3),MSTRG.23006(--),MSTRG.23167(IQD32),MSTRG.23258(LAX2),MSTRG.24099(SRK6),MSTRG.24240(HAM1),MSTRG.25150(SMC4),MSTRG.25151(SMC4),MSTRG.26335(CLSY4),MSTRG.26806(SNL3),MSTRG.26835(LKR/SDH),MSTRG.27519(GATA8),M…
GO:0008150	Biological Process	GO:0009987	cellular process	188	360	MSTRG.10815(PI1),MSTRG.13220(ICL),MSTRG.15375(FH7),MSTRG.16565(TPS09),MSTRG.19763(JAL5),MSTRG.29116(AFP2),MSTRG.3256(BGLU19),MSTRG.33299(CHX20),MSTRG.35403(PRS2),MSTRG.38808(KCS1),MSTRG.38852(NAC002),MSTRG.39445(OVA6),MSTRG.40007(--),MSTRG.41112(--),MSTRG.43809(--),MSTRG.44024(XTH11),MSTRG.44622(NAC079),MSTRG.45506(RAB28),MSTRG.46021(At5g65490),MSTRG.46356(OMT1),MSTRG.47211(AIL1),MSTRG.47278(MYB5…	MSTRG.11098(SPH11),MSTRG.13549(PDV2),MSTRG.20291(DRB3),MSTRG.2126(PORB),MSTRG.2486(DXS),MSTRG.26835(LKR/SDH),MSTRG.27519(GATA8),MSTRG.34099(LHCA3),MSTRG.3474(TDR),MSTRG.34747(HSL1),MSTRG.36291(GATA8),MSTRG.37497(--),MSTRG.44595(CPK32),MSTRG.48395(GRF2),MSTRG.49221(TT10),MSTRG.49222(TT10),MSTRG.49916(MVP1),MSTRG.49940(ASP4),MSTRG.50497(OlnB1),MSTRG.53617(XTH9),MSTRG.55374(TUBB2),MSTRG.5660(TSO2),M…	334	950	MSTRG.10815(PI1),MSTRG.13220(ICL),MSTRG.14003(At4g09580),MSTRG.14148(TPS07),MSTRG.14149(TPS26),MSTRG.14150(TPS07),MSTRG.14866(SCT),MSTRG.15809(ADPG2),MSTRG.15847(UBA2A),MSTRG.16463(BHLH71),MSTRG.16565(TPS09),MSTRG.16675(MIPS),MSTRG.19763(JAL5),MSTRG.24250(SUC1),MSTRG.27235(PHB1),MSTRG.30059(SKS1),MSTRG.30967(At4g31860),MSTRG.31141(NAPB),MSTRG.31164(PXG1),MSTRG.31165(PXG1),MSTRG.3256(BGLU19),MSTRG…	MSTRG.10198(At5g54220),MSTRG.10986(--),MSTRG.12265(UBP13),MSTRG.13032(GAD4),MSTRG.13033(GAD4),MSTRG.14893(VLN4),MSTRG.15030(MYB3R1),MSTRG.18452(--),MSTRG.18640(ULP1D),MSTRG.19898(ABCC4),MSTRG.2126(PORB),MSTRG.22318(ACO3),MSTRG.23006(--),MSTRG.23167(IQD32),MSTRG.23258(LAX2),MSTRG.24099(SRK6),MSTRG.24240(HAM1),MSTRG.25150(SMC4),MSTRG.25151(SMC4),MSTRG.26335(CLSY4),MSTRG.26806(SNL3),MSTRG.26835(LKR/…
GO:0008150	Biological Process	GO:0022414	reproductive process	43	36	MSTRG.13220(ICL),MSTRG.19762(F-ATMBP),MSTRG.3256(BGLU19),MSTRG.39445(OVA6),MSTRG.45506(RAB28),MSTRG.49978(ECP63),MSTRG.58334(PRP31),MSTRG.63105(CRU4),MSTRG.64114(BGLU19),MSTRG.64292(ABI5),ncbi_106345698(LOC106345698),ncbi_106360478(LOC106360478),ncbi_106368491(LOC106368491),ncbi_106375563(LOC106375563),ncbi_106382447(LOC106382447),ncbi_106384310(LOC106384310),ncbi_106389124(LOC106389124),ncbi_106…	MSTRG.11098(SPH11),MSTRG.26835(LKR/SDH),MSTRG.3474(TDR),MSTRG.34747(HSL1),MSTRG.44595(CPK32),MSTRG.48395(GRF2),MSTRG.65902(dVPE),MSTRG.73566(RH50),MSTRG.81231(MAP1A),ncbi_106347204(LOC106347204),ncbi_106349446(LOC106349446),ncbi_106352904(LOC106352904),ncbi_106358132(LOC106358132),ncbi_106360716(LOC106360716),ncbi_106361259(LOC106361259),ncbi_106367461(LOC106367461),ncbi_106382035(LOC106382035),n…	87	107	MSTRG.13220(ICL),MSTRG.15809(ADPG2),MSTRG.16675(MIPS),MSTRG.19762(F-ATMBP),MSTRG.24250(SUC1),MSTRG.27235(PHB1),MSTRG.31164(PXG1),MSTRG.31165(PXG1),MSTRG.3256(BGLU19),MSTRG.39445(OVA6),MSTRG.45506(RAB28),MSTRG.48731(ddx11),MSTRG.4884(OlnB1),MSTRG.49978(ECP63),MSTRG.56076(ICL),MSTRG.57458(NDT1),MSTRG.63105(CRU4),MSTRG.63106(CRU4),MSTRG.64114(BGLU19),MSTRG.67100(At2g46260),MSTRG.67520(RNF217),MSTRG.…	MSTRG.18640(ULP1D),MSTRG.24099(SRK6),MSTRG.25150(SMC4),MSTRG.25151(SMC4),MSTRG.26835(LKR/SDH),MSTRG.31232(HSP70-6),MSTRG.31856(TWN2),MSTRG.34747(HSL1),MSTRG.46866(SFH3),MSTRG.48917(JAL35),MSTRG.48949(CHR17),MSTRG.49357(OVA2),MSTRG.50625(--),MSTRG.53774(At4g01160),MSTRG.54766(--),MSTRG.56127(KIN10A),MSTRG.6156(OPT8),MSTRG.65223(At5g27750),MSTRG.65902(dVPE),MSTRG.70781(dVPE),MSTRG.73314(At1g51370),…
GO:0008150	Biological Process	GO:0022610	biological adhesion	0	3	--	ncbi_106366952(LOC106366952),ncbi_106390702(LOC106390702),ncbi_106437868(LOC106437868)	0	3	--	MSTRG.82911(TON2),ncbi_106355539(LOC106355539),ncbi_106390702(LOC106390702)
GO:0008150	Biological Process	GO:0023052	signaling	14	12	MSTRG.19763(JAL5),MSTRG.29116(AFP2),MSTRG.3256(BGLU19),MSTRG.38852(NAC002),MSTRG.63105(CRU4),MSTRG.64114(BGLU19),MSTRG.64292(ABI5),MSTRG.84867(JAL5),ncbi_106370137(LOC106370137),ncbi_106381476(LOC106381476),ncbi_106412136(LOC106412136),ncbi_106414978(LOC106414978),ncbi_106414986(LOC106414986),ncbi_106443040(LOC106443040)	MSTRG.34747(HSL1),MSTRG.48395(GRF2),MSTRG.65902(dVPE),MSTRG.75074(XTH24),ncbi_106390237(LOC106390237),ncbi_106400411(LOC106400411),ncbi_106402367(LOC106402367),ncbi_106419417(LOC106419417),ncbi_106438157(LOC106438157),ncbi_111201002(LOC111201002),ncbi_111204021(LOC111204021),ncbi_111213671(LOC111213671)	37	37	MSTRG.15847(UBA2A),MSTRG.19763(JAL5),MSTRG.31164(PXG1),MSTRG.31165(PXG1),MSTRG.3256(BGLU19),MSTRG.33775(BFRUCT3),MSTRG.33776(BFRUCT4),MSTRG.38852(NAC002),MSTRG.41680(At5g57670),MSTRG.44494(SN1),MSTRG.48616(PIF6),MSTRG.55436(NAC062),MSTRG.56456(TPS26),MSTRG.57481(SOT1),MSTRG.58974(BCAT6),MSTRG.63105(CRU4),MSTRG.63106(CRU4),MSTRG.64114(BGLU19),MSTRG.6777(ASK4),MSTRG.76394(WRKY25),MSTRG.7783(S2),MST…	MSTRG.29356(RHM1),MSTRG.29682(PLDALPHA2),MSTRG.29686(ABA2),MSTRG.34747(HSL1),MSTRG.3832(RDR1),MSTRG.44838(RDR1),MSTRG.44839(RDR1),MSTRG.44852(RDR1),MSTRG.44856(RDR1),MSTRG.44857(RDR1),MSTRG.53060(ARF11),MSTRG.55391(ARR13),MSTRG.57457(ERS1),MSTRG.59388(CBP60G),MSTRG.61855(DOR),MSTRG.62993(HFR1),MSTRG.65902(dVPE),MSTRG.67395(PBL1),MSTRG.70781(dVPE),MSTRG.75074(XTH24),MSTRG.82382(PLC5),MSTRG.88449(S…
GO:0008150	Biological Process	GO:0032501	multicellular organismal process	68	94	MSTRG.3256(BGLU19),MSTRG.38808(KCS1),MSTRG.38852(NAC002),MSTRG.39445(OVA6),MSTRG.44622(NAC079),MSTRG.59840(TPLATE),MSTRG.60418(DOF1.3),MSTRG.63105(CRU4),MSTRG.64114(BGLU19),MSTRG.64292(ABI5),ncbi_106345259(LOC106345259),ncbi_106345698(LOC106345698),ncbi_106351779(LOC106351779),ncbi_106357545(LOC106357545),ncbi_106359888(LOC106359888),ncbi_106360031(LOC106360031),ncbi_106360478(LOC106360478),ncbi_…	MSTRG.11098(SPH11),MSTRG.2126(PORB),MSTRG.2486(DXS),MSTRG.27519(GATA8),MSTRG.3474(TDR),MSTRG.34747(HSL1),MSTRG.36291(GATA8),MSTRG.37497(--),MSTRG.48395(GRF2),MSTRG.49940(ASP4),MSTRG.53617(XTH9),MSTRG.5660(TSO2),MSTRG.60257(At1g29670),MSTRG.65902(dVPE),MSTRG.70721(UGE4),MSTRG.73566(RH50),MSTRG.76570(HSP90-7),MSTRG.81231(MAP1A),MSTRG.82204(ALATS),ncbi_106346178(LOC106346178),ncbi_106347204(LOC10634…	145	232	MSTRG.15809(ADPG2),MSTRG.15847(UBA2A),MSTRG.16463(BHLH71),MSTRG.16675(MIPS),MSTRG.24250(SUC1),MSTRG.30059(SKS1),MSTRG.31141(NAPB),MSTRG.31164(PXG1),MSTRG.31165(PXG1),MSTRG.3256(BGLU19),MSTRG.33775(BFRUCT3),MSTRG.33776(BFRUCT4),MSTRG.35603(EXO84C),MSTRG.38852(NAC002),MSTRG.39445(OVA6),MSTRG.4832(DHS),MSTRG.54957(ABCG5),MSTRG.55436(NAC062),MSTRG.60257(At1g29670),MSTRG.60418(DOF1.3),MSTRG.63105(CRU4…	MSTRG.2126(PORB),MSTRG.23258(LAX2),MSTRG.24099(SRK6),MSTRG.24240(HAM1),MSTRG.25150(SMC4),MSTRG.25151(SMC4),MSTRG.26335(CLSY4),MSTRG.27519(GATA8),MSTRG.29682(PLDALPHA2),MSTRG.31362(BLH2),MSTRG.34421(--),MSTRG.34747(HSL1),MSTRG.37497(--),MSTRG.46866(SFH3),MSTRG.48917(JAL35),MSTRG.48949(CHR17),MSTRG.50370(At3g22650),MSTRG.53620(CYP708A2),MSTRG.53774(At4g01160),MSTRG.54766(--),MSTRG.55391(ARR13),MSTR…
GO:0008150	Biological Process	GO:0032502	developmental process	102	152	MSTRG.13220(ICL),MSTRG.15375(FH7),MSTRG.19762(F-ATMBP),MSTRG.3256(BGLU19),MSTRG.38808(KCS1),MSTRG.39445(OVA6),MSTRG.44622(NAC079),MSTRG.45506(RAB28),MSTRG.49978(ECP63),MSTRG.55536(GAD2),MSTRG.58334(PRP31),MSTRG.59840(TPLATE),MSTRG.60418(DOF1.3),MSTRG.63105(CRU4),MSTRG.64114(BGLU19),MSTRG.64292(ABI5),MSTRG.81982(GAD2),MSTRG.86253(HMGA),ncbi_106345698(LOC106345698),ncbi_106346567(LOC106346567),ncbi…	MSTRG.11098(SPH11),MSTRG.2126(PORB),MSTRG.2486(DXS),MSTRG.26835(LKR/SDH),MSTRG.3474(TDR),MSTRG.34747(HSL1),MSTRG.37497(--),MSTRG.44595(CPK32),MSTRG.48395(GRF2),MSTRG.49940(ASP4),MSTRG.50497(OlnB1),MSTRG.53617(XTH9),MSTRG.60257(At1g29670),MSTRG.65902(dVPE),MSTRG.70721(UGE4),MSTRG.71346(HDG12),MSTRG.71997(PBL21),MSTRG.73566(RH50),MSTRG.75074(XTH24),MSTRG.76570(HSP90-7),MSTRG.81231(MAP1A),MSTRG.8220…	188	333	MSTRG.13220(ICL),MSTRG.15809(ADPG2),MSTRG.15847(UBA2A),MSTRG.16675(MIPS),MSTRG.19762(F-ATMBP),MSTRG.24250(SUC1),MSTRG.27235(PHB1),MSTRG.30059(SKS1),MSTRG.31141(NAPB),MSTRG.31164(PXG1),MSTRG.31165(PXG1),MSTRG.3256(BGLU19),MSTRG.33775(BFRUCT3),MSTRG.33776(BFRUCT4),MSTRG.35536(YUC10),MSTRG.35603(EXO84C),MSTRG.39445(OVA6),MSTRG.45506(RAB28),MSTRG.4832(DHS),MSTRG.48616(PIF6),MSTRG.4884(OlnB1),MSTRG.49…	MSTRG.10198(At5g54220),MSTRG.13033(GAD4),MSTRG.14893(VLN4),MSTRG.18640(ULP1D),MSTRG.2126(PORB),MSTRG.23258(LAX2),MSTRG.24240(HAM1),MSTRG.25150(SMC4),MSTRG.25151(SMC4),MSTRG.26335(CLSY4),MSTRG.26835(LKR/SDH),MSTRG.28086(PATL1),MSTRG.29682(PLDALPHA2),MSTRG.31232(HSP70-6),MSTRG.31362(BLH2),MSTRG.31856(TWN2),MSTRG.34421(--),MSTRG.34747(HSL1),MSTRG.37497(--),MSTRG.46866(SFH3),MSTRG.48917(JAL35),MSTRG.…
GO:0008150	Biological Process	GO:0040007	growth	7	20	MSTRG.15375(FH7),MSTRG.54705(At2g39360),MSTRG.55536(GAD2),MSTRG.81982(GAD2),ncbi_106379051(LOC106379051),ncbi_106422044(BNAC07G08710D),ncbi_106423272(LOC106423272)	MSTRG.34747(HSL1),MSTRG.49940(ASP4),ncbi_106350962(LOC106350962),ncbi_106351108(LOC106351108),ncbi_106359787(LOC106359787),ncbi_106361254(LOC106361254),ncbi_106362383(LOC106362383),ncbi_106372227(LOC106372227),ncbi_106402507(LOC106402507),ncbi_106402597(LOC106402597),ncbi_106404528(BNAC09G17200D),ncbi_106406877(LOC106406877),ncbi_106423630(LOC106423630),ncbi_106433584(LOC106433584),ncbi_106434029…	14	35	MSTRG.30059(SKS1),MSTRG.54705(At2g39360),MSTRG.55536(GAD2),MSTRG.65465(XYLA),MSTRG.66593(CESA3),MSTRG.6777(ASK4),MSTRG.78335(ATG3),MSTRG.81982(GAD2),ncbi_106351695(LOC106351695),ncbi_106376118(LOC106376118),ncbi_106379051(LOC106379051),ncbi_106420539(LOC106420539),ncbi_106444966(LOC106444966),ncbi_106445767(LOC106445767)	MSTRG.13033(GAD4),MSTRG.14893(VLN4),MSTRG.23258(LAX2),MSTRG.28086(PATL1),MSTRG.29682(PLDALPHA2),MSTRG.34747(HSL1),MSTRG.40380(DIT1),MSTRG.48949(CHR17),MSTRG.55391(ARR13),MSTRG.57004(RDL3),MSTRG.6240(EXO70A1),MSTRG.68106(At2g39360),MSTRG.90161(MEKK1),ncbi_106349473(LOC106349473),ncbi_106355649(LOC106355649),ncbi_106366855(LOC106366855),ncbi_106368104(LOC106368104),ncbi_106379157(LOC106379157),ncbi…
GO:0008150	Biological Process	GO:0040011	locomotion	0	2	--	ncbi_106367475(LOC106367475),ncbi_106451149(LOC106451149)	0	1	--	ncbi_106451149(LOC106451149)
GO:0008150	Biological Process	GO:0044699	single-organism process	258	391	MSTRG.10815(PI1),MSTRG.13220(ICL),MSTRG.15375(FH7),MSTRG.16565(TPS09),MSTRG.19762(F-ATMBP),MSTRG.19763(JAL5),MSTRG.26419(ufaA1),MSTRG.29116(AFP2),MSTRG.29984(RD21A),MSTRG.3256(BGLU19),MSTRG.33299(CHX20),MSTRG.35403(PRS2),MSTRG.38808(KCS1),MSTRG.38852(NAC002),MSTRG.39445(OVA6),MSTRG.40007(--),MSTRG.41112(--),MSTRG.41535(--),MSTRG.43809(--),MSTRG.44327(SDH),MSTRG.44622(NAC079),MSTRG.45506(RAB28),MS…	MSTRG.11098(SPH11),MSTRG.20291(DRB3),MSTRG.2126(PORB),MSTRG.2486(DXS),MSTRG.26835(LKR/SDH),MSTRG.27519(GATA8),MSTRG.28113(At1g71691),MSTRG.34099(LHCA3),MSTRG.3474(TDR),MSTRG.34747(HSL1),MSTRG.35132(ALA9),MSTRG.36291(GATA8),MSTRG.37497(--),MSTRG.44595(CPK32),MSTRG.48395(GRF2),MSTRG.48546(CYP72A15),MSTRG.49221(TT10),MSTRG.49222(TT10),MSTRG.49916(MVP1),MSTRG.49940(ASP4),MSTRG.50497(OlnB1),MSTRG.5123…	480	993	MSTRG.10815(PI1),MSTRG.13220(ICL),MSTRG.14003(At4g09580),MSTRG.14148(TPS07),MSTRG.14149(TPS26),MSTRG.14150(TPS07),MSTRG.14866(SCT),MSTRG.15809(ADPG2),MSTRG.15847(UBA2A),MSTRG.16463(BHLH71),MSTRG.16565(TPS09),MSTRG.16675(MIPS),MSTRG.1936(NPF5.2),MSTRG.1937(NPF5.2),MSTRG.19762(F-ATMBP),MSTRG.19763(JAL5),MSTRG.24250(SUC1),MSTRG.26419(ufaA1),MSTRG.27235(PHB1),MSTRG.30059(SKS1),MSTRG.30967(At4g31860),…	MSTRG.10198(At5g54220),MSTRG.10986(--),MSTRG.12265(UBP13),MSTRG.13032(GAD4),MSTRG.13033(GAD4),MSTRG.14893(VLN4),MSTRG.15030(MYB3R1),MSTRG.19898(ABCC4),MSTRG.2126(PORB),MSTRG.23006(--),MSTRG.23167(IQD32),MSTRG.23258(LAX2),MSTRG.24099(SRK6),MSTRG.24240(HAM1),MSTRG.24241(--),MSTRG.25150(SMC4),MSTRG.25151(SMC4),MSTRG.26335(CLSY4),MSTRG.26835(LKR/SDH),MSTRG.27519(GATA8),MSTRG.28086(PATL1),MSTRG.29356(…
GO:0008150	Biological Process	GO:0048511	rhythmic process	3	16	MSTRG.92787(CP29B),ncbi_106357692(LOC106357692),ncbi_106437919(LOC106437919)	MSTRG.27519(GATA8),MSTRG.36291(GATA8),MSTRG.91301(At4g15430),MSTRG.92622(WNK9),ncbi_106346563(LOC106346563),ncbi_106361388(LOC106361388),ncbi_106367843(LOC106367843),ncbi_106389757(LOC106389757),ncbi_106411136(LOC106411136),ncbi_106411324(LOC106411324),ncbi_106415280(LOC106415280),ncbi_106415811(LOC106415811),ncbi_106439001(LOC106439001),ncbi_106442544(LOC106442544),ncbi_111202229(LOC111202229),n…	16	30	ncbi_106346269(LOC106346269),ncbi_106353086(BNAA03G32230D),ncbi_106353210(LOC106353210),ncbi_106361055(LOC106361055),ncbi_106361056(LOC106361056),ncbi_106361082(LOC106361082),ncbi_106371269(LOC106371269),ncbi_106388298(LOC106388298),ncbi_106391706(LOC106391706),ncbi_106397486(BNAC03G37520D),ncbi_106411701(LOC106411701),ncbi_106435384(BNAC05G40760D),ncbi_106451238(LOC106451238),ncbi_106452392(LOC1…	MSTRG.27519(GATA8),MSTRG.57457(ERS1),MSTRG.62993(HFR1),ncbi_106349476(LOC106349476),ncbi_106349478(LOC106349478),ncbi_106352831(LOC106352831),ncbi_106353645(LOC106353645),ncbi_106361388(LOC106361388),ncbi_106366108(LOC106366108),ncbi_106367902(LOC106367902),ncbi_106382808(LOC106382808),ncbi_106384869(LOC106384869),ncbi_106388846(LOC106388846),ncbi_106389757(LOC106389757),ncbi_106395634(LOC1063956…
GO:0008150	Biological Process	GO:0048518	positive regulation of biological process	4	4	MSTRG.41112(--),MSTRG.46356(OMT1),MSTRG.55536(GAD2),MSTRG.81982(GAD2)	MSTRG.71997(PBL21),MSTRG.72133(DDM1),MSTRG.91828(MES19),ncbi_106440661(LOC106440661)	6	22	MSTRG.55536(GAD2),MSTRG.72721(4CL1),MSTRG.72722(4CL1),MSTRG.81982(GAD2),ncbi_106347437(LOC106347437),ncbi_106351818(LOC106351818)	MSTRG.13032(GAD4),MSTRG.13033(GAD4),MSTRG.34155(--),MSTRG.3832(RDR1),MSTRG.44838(RDR1),MSTRG.44839(RDR1),MSTRG.44852(RDR1),MSTRG.44856(RDR1),MSTRG.44857(RDR1),MSTRG.65223(At5g27750),MSTRG.67395(PBL1),MSTRG.72133(DDM1),ncbi_106391446(LOC106391446),ncbi_106397187(LOC106397187),ncbi_106421236(LOC106421236),ncbi_106425834(LOC106425834),ncbi_106437874(LOC106437874),ncbi_106445598(LOC106445598),ncbi_10…
GO:0008150	Biological Process	GO:0048519	negative regulation of biological process	7	13	MSTRG.10815(PI1),ncbi_106368964(LOC106368964),ncbi_106369110(LOC106369110),ncbi_106391984(LOC106391984),ncbi_106397784(LOC106397784),ncbi_106419899(LOC106419899),ncbi_106436170(LOC106436170)	MSTRG.20291(DRB3),MSTRG.72133(DDM1),ncbi_106350482(LOC106350482),ncbi_106375772(LOC106375772),ncbi_106396137(LOC106396137),ncbi_106401262(LOC106401262),ncbi_106401504(LOC106401504),ncbi_106401569(BNAC05G45440D),ncbi_106435916(LOC106435916),ncbi_106441087(LOC106441087),ncbi_106444294(LOC106444294),ncbi_106444295(LOC106444295),ncbi_106451291(LOC106451291)	13	35	MSTRG.10815(PI1),MSTRG.34716(SCL30A),MSTRG.35603(EXO84C),MSTRG.43360(CYS4),MSTRG.81239(MAP70.3),ncbi_106349790(LOC106349790),ncbi_106375772(LOC106375772),ncbi_106389671(LOC106389671),ncbi_106416142(LOC106416142),ncbi_106428256(LOC106428256),ncbi_106434078(LOC106434078),ncbi_106436381(LOC106436381),ncbi_111212338(LOC111212338)	MSTRG.14893(VLN4),MSTRG.25150(SMC4),MSTRG.25151(SMC4),MSTRG.26335(CLSY4),MSTRG.3832(RDR1),MSTRG.44838(RDR1),MSTRG.44839(RDR1),MSTRG.44852(RDR1),MSTRG.44856(RDR1),MSTRG.44857(RDR1),MSTRG.48949(CHR17),MSTRG.56127(KIN10A),MSTRG.72133(DDM1),MSTRG.73771(CLSY4),MSTRG.83925(At5g05130),MSTRG.87582(RAD51),ncbi_106346204(LOC106346204),ncbi_106350482(LOC106350482),ncbi_106360831(LOC106360831),ncbi_106368104…
GO:0008150	Biological Process	GO:0050789	regulation of biological process	47	59	MSTRG.10815(PI1),MSTRG.19763(JAL5),MSTRG.29116(AFP2),MSTRG.3256(BGLU19),MSTRG.38852(NAC002),MSTRG.41112(--),MSTRG.44622(NAC079),MSTRG.46356(OMT1),MSTRG.47211(AIL1),MSTRG.47278(MYB54),MSTRG.53481(BDG3),MSTRG.54705(At2g39360),MSTRG.55536(GAD2),MSTRG.60418(DOF1.3),MSTRG.63105(CRU4),MSTRG.64114(BGLU19),MSTRG.64292(ABI5),MSTRG.81982(GAD2),MSTRG.84867(JAL5),MSTRG.86253(HMGA),MSTRG.92787(CP29B),ncbi_106…	MSTRG.20291(DRB3),MSTRG.2126(PORB),MSTRG.2486(DXS),MSTRG.27519(GATA8),MSTRG.3474(TDR),MSTRG.34747(HSL1),MSTRG.36291(GATA8),MSTRG.48395(GRF2),MSTRG.53617(XTH9),MSTRG.65902(dVPE),MSTRG.71997(PBL21),MSTRG.72133(DDM1),MSTRG.75074(XTH24),MSTRG.76570(HSP90-7),MSTRG.82204(ALATS),MSTRG.91301(At4g15430),MSTRG.91828(MES19),ncbi_106347266(LOC106347266),ncbi_106350482(LOC106350482),ncbi_106352092(LOC10635209…	90	191	MSTRG.10815(PI1),MSTRG.15847(UBA2A),MSTRG.16463(BHLH71),MSTRG.19763(JAL5),MSTRG.24250(SUC1),MSTRG.31164(PXG1),MSTRG.31165(PXG1),MSTRG.3256(BGLU19),MSTRG.33775(BFRUCT3),MSTRG.33776(BFRUCT4),MSTRG.34716(SCL30A),MSTRG.35603(EXO84C),MSTRG.38852(NAC002),MSTRG.41680(At5g57670),MSTRG.43360(CYS4),MSTRG.44494(SN1),MSTRG.46967(SNL4),MSTRG.47211(AIL1),MSTRG.48616(PIF6),MSTRG.48731(ddx11),MSTRG.54705(At2g393…	MSTRG.13032(GAD4),MSTRG.13033(GAD4),MSTRG.14893(VLN4),MSTRG.15030(MYB3R1),MSTRG.2126(PORB),MSTRG.23006(--),MSTRG.23258(LAX2),MSTRG.24240(HAM1),MSTRG.25150(SMC4),MSTRG.25151(SMC4),MSTRG.26335(CLSY4),MSTRG.26806(SNL3),MSTRG.27519(GATA8),MSTRG.29356(RHM1),MSTRG.29682(PLDALPHA2),MSTRG.29686(ABA2),MSTRG.31856(TWN2),MSTRG.34155(--),MSTRG.34747(HSL1),MSTRG.35789(SNL3),MSTRG.3832(RDR1),MSTRG.38721(At1g50…
GO:0008150	Biological Process	GO:0050896	response to stimulus	117	104	MSTRG.10815(PI1),MSTRG.15375(FH7),MSTRG.19762(F-ATMBP),MSTRG.19763(JAL5),MSTRG.29116(AFP2),MSTRG.3256(BGLU19),MSTRG.38808(KCS1),MSTRG.38852(NAC002),MSTRG.43809(--),MSTRG.46356(OMT1),MSTRG.47278(MYB54),MSTRG.48219(--),MSTRG.53481(BDG3),MSTRG.54705(At2g39360),MSTRG.55536(GAD2),MSTRG.60114(SSL9),MSTRG.62359(At3g50280),MSTRG.63105(CRU4),MSTRG.64114(BGLU19),MSTRG.64292(ABI5),MSTRG.65157(--),MSTRG.7753…	MSTRG.11098(SPH11),MSTRG.1214(ATTI7),MSTRG.20291(DRB3),MSTRG.2126(PORB),MSTRG.2486(DXS),MSTRG.25796(GLC1),MSTRG.26835(LKR/SDH),MSTRG.34099(LHCA3),MSTRG.34747(HSL1),MSTRG.35057(At5g46871),MSTRG.35063(At5g46871),MSTRG.44595(CPK32),MSTRG.48395(GRF2),MSTRG.49916(MVP1),MSTRG.49940(ASP4),MSTRG.5123(GH3.15),MSTRG.55374(TUBB2),MSTRG.60257(At1g29670),MSTRG.60884(RF45),MSTRG.65902(dVPE),MSTRG.71346(HDG12),…	251	253	MSTRG.10815(PI1),MSTRG.14866(SCT),MSTRG.15847(UBA2A),MSTRG.16675(MIPS),MSTRG.1936(NPF5.2),MSTRG.1937(NPF5.2),MSTRG.19762(F-ATMBP),MSTRG.19763(JAL5),MSTRG.24250(SUC1),MSTRG.25421(BGLU3),MSTRG.26707(--),MSTRG.27235(PHB1),MSTRG.30828(BGLU3),MSTRG.30967(At4g31860),MSTRG.31141(NAPB),MSTRG.31164(PXG1),MSTRG.31165(PXG1),MSTRG.3256(BGLU19),MSTRG.33660(AGD8),MSTRG.33775(BFRUCT3),MSTRG.33776(BFRUCT4),MSTRG…	MSTRG.1214(ATTI7),MSTRG.1215(ATTI1),MSTRG.12265(UBP13),MSTRG.13032(GAD4),MSTRG.13033(GAD4),MSTRG.14893(VLN4),MSTRG.15327(PDF3.2),MSTRG.18452(--),MSTRG.18640(ULP1D),MSTRG.2126(PORB),MSTRG.23006(--),MSTRG.23167(IQD32),MSTRG.23258(LAX2),MSTRG.24240(HAM1),MSTRG.24241(--),MSTRG.25150(SMC4),MSTRG.25151(SMC4),MSTRG.25796(GLC1),MSTRG.26335(CLSY4),MSTRG.26806(SNL3),MSTRG.26835(LKR/SDH),MSTRG.28086(PATL1),…
GO:0008150	Biological Process	GO:0051179	localization	68	91	MSTRG.10815(PI1),MSTRG.15375(FH7),MSTRG.3256(BGLU19),MSTRG.33299(CHX20),MSTRG.41112(--),MSTRG.41535(--),MSTRG.54705(At2g39360),MSTRG.55536(GAD2),MSTRG.59840(TPLATE),MSTRG.63105(CRU4),MSTRG.64079(NHX8),MSTRG.64114(BGLU19),MSTRG.81982(GAD2),MSTRG.82230(MRS2-1),MSTRG.83743(CYP86A1),ncbi_106345442(LOC106345442),ncbi_106345973(LOC106345973),ncbi_106346947(LOC106346947),ncbi_106351728(LOC106351728),ncb…	MSTRG.2486(DXS),MSTRG.34747(HSL1),MSTRG.35132(ALA9),MSTRG.37497(--),MSTRG.48546(CYP72A15),MSTRG.49916(MVP1),MSTRG.50497(OlnB1),MSTRG.60257(At1g29670),MSTRG.65902(dVPE),MSTRG.76570(HSP90-7),MSTRG.82204(ALATS),MSTRG.91828(MES19),ncbi_106345584(LOC106345584),ncbi_106346772(LOC106346772),ncbi_106346955(LOC106346955),ncbi_106347170(LOC106347170),ncbi_106347720(LOC106347720),ncbi_106348438(LOC106348438…	142	248	MSTRG.10815(PI1),MSTRG.1936(NPF5.2),MSTRG.1937(NPF5.2),MSTRG.24250(SUC1),MSTRG.30262(OEP162),MSTRG.30264(OEP162),MSTRG.31141(NAPB),MSTRG.31164(PXG1),MSTRG.31165(PXG1),MSTRG.3256(BGLU19),MSTRG.33775(BFRUCT3),MSTRG.33776(BFRUCT4),MSTRG.4884(OlnB1),MSTRG.52273(PRA1B3),MSTRG.53685(At1g56220),MSTRG.53686(At1g56220),MSTRG.53967(NUP98B),MSTRG.54705(At2g39360),MSTRG.54957(ABCG5),MSTRG.55536(GAD2),MSTRG.5…	MSTRG.10986(--),MSTRG.13032(GAD4),MSTRG.13033(GAD4),MSTRG.14893(VLN4),MSTRG.19898(ABCC4),MSTRG.23006(--),MSTRG.23258(LAX2),MSTRG.28086(PATL1),MSTRG.29682(PLDALPHA2),MSTRG.31232(HSP70-6),MSTRG.32427(DRP2A),MSTRG.34155(--),MSTRG.34747(HSL1),MSTRG.37497(--),MSTRG.3832(RDR1),MSTRG.39237(AHA3),MSTRG.40380(DIT1),MSTRG.4263(CAT7),MSTRG.43719(VPS45),MSTRG.44838(RDR1),MSTRG.44852(RDR1),MSTRG.44856(RDR1),M…
GO:0008150	Biological Process	GO:0051704	multi-organism process	37	27	MSTRG.10815(PI1),MSTRG.29116(AFP2),MSTRG.3256(BGLU19),MSTRG.38852(NAC002),MSTRG.64114(BGLU19),MSTRG.65157(--),MSTRG.92787(CP29B),ncbi_106351453(LOC106351453),ncbi_106353239(LOC106353239),ncbi_106353544(LOC106353544),ncbi_106353754(LOC106353754),ncbi_106358379(LOC106358379),ncbi_106360408(LOC106360408),ncbi_106381381(LOC106381381),ncbi_106382934(LOC106382934),ncbi_106386368(LOC106386368),ncbi_1063…	MSTRG.1214(ATTI7),MSTRG.35057(At5g46871),MSTRG.35063(At5g46871),MSTRG.49916(MVP1),MSTRG.60257(At1g29670),MSTRG.60884(RF45),MSTRG.71346(HDG12),MSTRG.72133(DDM1),MSTRG.91828(MES19),ncbi_106345992(LOC106345992),ncbi_106350813(BNAC06G00720D),ncbi_106358259(LOC106358259),ncbi_106367475(LOC106367475),ncbi_106377605(LOC106377605),ncbi_106389650(LOC106389650),ncbi_106392390(LOC106392390),ncbi_106406011(L…	94	95	MSTRG.10815(PI1),MSTRG.16675(MIPS),MSTRG.1936(NPF5.2),MSTRG.1937(NPF5.2),MSTRG.24250(SUC1),MSTRG.25421(BGLU3),MSTRG.26707(--),MSTRG.30828(BGLU3),MSTRG.3256(BGLU19),MSTRG.33775(BFRUCT3),MSTRG.33776(BFRUCT4),MSTRG.38852(NAC002),MSTRG.48957(RPP1),MSTRG.55572(NPF2.3),MSTRG.57928(BGLU29),MSTRG.60257(At1g29670),MSTRG.64114(BGLU19),MSTRG.6777(ASK4),MSTRG.71442(PHL2),MSTRG.72721(4CL1),MSTRG.72722(4CL1),M…	MSTRG.1214(ATTI7),MSTRG.1215(ATTI1),MSTRG.15327(PDF3.2),MSTRG.23258(LAX2),MSTRG.24099(SRK6),MSTRG.31232(HSP70-6),MSTRG.3832(RDR1),MSTRG.40380(DIT1),MSTRG.4263(CAT7),MSTRG.4291(At3g10195),MSTRG.43719(VPS45),MSTRG.44838(RDR1),MSTRG.44839(RDR1),MSTRG.44852(RDR1),MSTRG.44856(RDR1),MSTRG.44857(RDR1),MSTRG.47505(MAM3),MSTRG.48341(LCR53),MSTRG.56792(VPS45),MSTRG.57457(ERS1),MSTRG.59388(CBP60G),MSTRG.673…
GO:0008150	Biological Process	GO:0065007	biological regulation	64	113	MSTRG.10815(PI1),MSTRG.19763(JAL5),MSTRG.29116(AFP2),MSTRG.3256(BGLU19),MSTRG.33299(CHX20),MSTRG.38852(NAC002),MSTRG.41112(--),MSTRG.44622(NAC079),MSTRG.46356(OMT1),MSTRG.47211(AIL1),MSTRG.47278(MYB54),MSTRG.53481(BDG3),MSTRG.54705(At2g39360),MSTRG.55536(GAD2),MSTRG.60418(DOF1.3),MSTRG.63105(CRU4),MSTRG.64114(BGLU19),MSTRG.64292(ABI5),MSTRG.81982(GAD2),MSTRG.84867(JAL5),MSTRG.86253(HMGA),MSTRG.92…	MSTRG.20291(DRB3),MSTRG.2126(PORB),MSTRG.2486(DXS),MSTRG.27519(GATA8),MSTRG.3474(TDR),MSTRG.34747(HSL1),MSTRG.36291(GATA8),MSTRG.48395(GRF2),MSTRG.50497(OlnB1),MSTRG.5123(GH3.15),MSTRG.53617(XTH9),MSTRG.65902(dVPE),MSTRG.71997(PBL21),MSTRG.72133(DDM1),MSTRG.75074(XTH24),MSTRG.76570(HSP90-7),MSTRG.82204(ALATS),MSTRG.91301(At4g15430),MSTRG.91828(MES19),ncbi_106347166(LOC106347166),ncbi_106347266(LO…	133	273	MSTRG.10815(PI1),MSTRG.15847(UBA2A),MSTRG.16463(BHLH71),MSTRG.16675(MIPS),MSTRG.19763(JAL5),MSTRG.24250(SUC1),MSTRG.31141(NAPB),MSTRG.31164(PXG1),MSTRG.31165(PXG1),MSTRG.3256(BGLU19),MSTRG.33775(BFRUCT3),MSTRG.33776(BFRUCT4),MSTRG.34716(SCL30A),MSTRG.35536(YUC10),MSTRG.35603(EXO84C),MSTRG.38852(NAC002),MSTRG.41680(At5g57670),MSTRG.43360(CYS4),MSTRG.44494(SN1),MSTRG.46967(SNL4),MSTRG.47211(AIL1),M…	MSTRG.13032(GAD4),MSTRG.13033(GAD4),MSTRG.14893(VLN4),MSTRG.15030(MYB3R1),MSTRG.2126(PORB),MSTRG.23006(--),MSTRG.23258(LAX2),MSTRG.24240(HAM1),MSTRG.25150(SMC4),MSTRG.25151(SMC4),MSTRG.26335(CLSY4),MSTRG.26806(SNL3),MSTRG.27519(GATA8),MSTRG.29356(RHM1),MSTRG.29682(PLDALPHA2),MSTRG.29686(ABA2),MSTRG.31856(TWN2),MSTRG.34155(--),MSTRG.34747(HSL1),MSTRG.35789(SNL3),MSTRG.3832(RDR1),MSTRG.38721(At1g50…
GO:0008150	Biological Process	GO:0071840	cellular component organization or biogenesis	43	120	MSTRG.15375(FH7),MSTRG.16565(TPS09),MSTRG.3256(BGLU19),MSTRG.39445(OVA6),MSTRG.44024(XTH11),MSTRG.47278(MYB54),MSTRG.54705(At2g39360),MSTRG.64114(BGLU19),MSTRG.77539(XTH25),MSTRG.86253(HMGA),ncbi_106357196(LOC106357196),ncbi_106361772(LOC106361772),ncbi_106363599(LOC106363599),ncbi_106365331(LOC106365331),ncbi_106368296(LOC106368296),ncbi_106369401(LOC106369401),ncbi_106373529(LOC106373529),ncbi_…	MSTRG.13549(PDV2),MSTRG.34747(HSL1),MSTRG.44595(CPK32),MSTRG.49916(MVP1),MSTRG.49940(ASP4),MSTRG.50497(OlnB1),MSTRG.53617(XTH9),MSTRG.55374(TUBB2),MSTRG.65902(dVPE),MSTRG.70721(UGE4),MSTRG.71346(HDG12),MSTRG.71997(PBL21),MSTRG.72133(DDM1),MSTRG.73566(RH50),MSTRG.75074(XTH24),MSTRG.76570(HSP90-7),MSTRG.79360(FUT6),MSTRG.79709(AXS2),MSTRG.83074(--),ncbi_106345547(LOC106345547),ncbi_106345548(LOC106…	73	244	MSTRG.14149(TPS26),MSTRG.15809(ADPG2),MSTRG.16565(TPS09),MSTRG.27235(PHB1),MSTRG.30059(SKS1),MSTRG.31164(PXG1),MSTRG.31165(PXG1),MSTRG.3256(BGLU19),MSTRG.33775(BFRUCT3),MSTRG.33776(BFRUCT4),MSTRG.39445(OVA6),MSTRG.48731(ddx11),MSTRG.4884(OlnB1),MSTRG.54705(At2g39360),MSTRG.56456(TPS26),MSTRG.57372(OXA1L),MSTRG.57474(bVPE),MSTRG.57928(BGLU29),MSTRG.59831(At1g63010),MSTRG.64114(BGLU19),MSTRG.65465(…	MSTRG.10986(--),MSTRG.14893(VLN4),MSTRG.24240(HAM1),MSTRG.25150(SMC4),MSTRG.25151(SMC4),MSTRG.26335(CLSY4),MSTRG.28086(PATL1),MSTRG.28223(PAT22),MSTRG.28552(XYL1),MSTRG.29356(RHM1),MSTRG.29682(PLDALPHA2),MSTRG.31232(HSP70-6),MSTRG.34747(HSL1),MSTRG.38654(ACT5),MSTRG.39237(AHA3),MSTRG.40380(DIT1),MSTRG.42335(XTH29),MSTRG.43719(VPS45),MSTRG.48917(JAL35),MSTRG.48949(CHR17),MSTRG.49357(OVA2),MSTRG.50…
GO:0008150	Biological Process	GO:0098754	detoxification	0	0	--	--	0	2	--	MSTRG.59845(HMA5),MSTRG.67468(LOL1)
