# Supplementary material for: Effects of Low Nighttime Temperature on Fatty Acid Content in Developing Seeds from Brassica napus L. Based on RNA-Seq and Metabolome
Source: Plants (Basel). 2023 Jan 10;12(2):325. doi: 10.3390/plants12020325 (PMC9862530; doi:10.3390/plants12020325)
Supplement: Supplementary file 1 [file plants-12-00325-s001.zip › Table S12.xls]

Table S12 KEGG enrichment on WTSL in HNT
Pathway	Pathway_ID	KEGG_A_class	KEGG_B_class	SFE18-vs-STE18(2420)	SFE18-vs-STE18_Pvalue	SFE18-vs-STE18_Qvalue	SSE18-vs-SFE18(1689)	SSE18-vs-SFE18_Pvalue	SSE18-vs-SFE18_Qvalue
2-Oxocarboxylic acid metabolism	ko01210	Metabolism	Global and overview maps	46	0.07517697	1.87E-01	27	0.4442221	1.00E+00
ABC transporters	ko02010	Environmental Information Processing	Membrane transport	14	0.2162301	4.36E-01	8	0.5157906	1.00E+00
Alanine, aspartate and glutamate metabolism	ko00250	Metabolism	Amino acid metabolism	40	0.002619468	1.19E-02	32	0.00087692	6.29E-03
Amino sugar and nucleotide sugar metabolism	ko00520	Metabolism	Carbohydrate metabolism	105	4.88E-10	5.64E-09	90	2.37E-13	4.64E-12
Aminoacyl-tRNA biosynthesis	ko00970	Genetic Information Processing	Translation	9	0.9999993	1.00E+00	22	0.4351992	1.00E+00
Anthocyanin biosynthesis	ko00942	Metabolism	Biosynthesis of other secondary metabolites	1	0.5728936	9.09E-01	0	1	1
Arachidonic acid metabolism	ko00590	Metabolism	Lipid metabolism	12	0.2245589	4.46E-01	6	0.6476813	1.00E+00
Arginine and proline metabolism	ko00330	Metabolism	Amino acid metabolism	37	0.03664101	1.06E-01	19	0.5505674	1.00E+00
Arginine biosynthesis	ko00220	Metabolism	Amino acid metabolism	25	0.02975179	9.00E-02	21	0.00709763	3.33E-02
Ascorbate and aldarate metabolism	ko00053	Metabolism	Carbohydrate metabolism	31	0.04896785	1.27E-01	22	0.07827106	2.65E-01
Autophagy - other	ko04136	Cellular Processes	Transport and catabolism	7	0.9999187	1.00E+00	2	0.9999951	1.00E+00
Basal transcription factors	ko03022	Genetic Information Processing	Transcription	0	1	1	1	0.9999999	1.00E+00
Base excision repair	ko03410	Genetic Information Processing	Replication and repair	16	0.6117831	9.48E-01	8	0.9048083	1.00E+00
Betalain biosynthesis	ko00965	Metabolism	Biosynthesis of other secondary metabolites	1	0.9120889	1.00E+00	0	1	1
Biosynthesis of amino acids	ko01230	Metabolism	Global and overview maps	126	0.1135121	2.53E-01	104	0.002533014	1.34E-02
Biosynthesis of secondary metabolites	ko01110	Metabolism	Global and overview maps	745	9.54E-37	3.03E-35	467	2.66E-13	4.64E-12
Biosynthesis of unsaturated fatty acids	ko01040	Metabolism	Lipid metabolism	25	0.000226858	1.25E-03	5	0.9255624	1.00E+00
Biotin metabolism	ko00780	Metabolism	Metabolism of cofactors and vitamins	22	1.05E-05	7.87E-05	20	5.46E-07	5.12E-06
Brassinosteroid biosynthesis	ko00905	Metabolism	Metabolism of terpenoids and polyketides	10	0.01513442	5.19E-02	4	0.416456	9.96E-01
Butanoate metabolism	ko00650	Metabolism	Carbohydrate metabolism	11	0.4107273	6.86E-01	12	0.04344048	1.51E-01
C5-Branched dibasic acid metabolism	ko00660	Metabolism	Carbohydrate metabolism	4	0.6247847	9.48E-01	1	0.9541395	1.00E+00
Carbon fixation in photosynthetic organisms	ko00710	Metabolism	Energy metabolism	82	1.67E-13	2.65E-12	87	4.10E-26	1.67E-24
Carbon metabolism	ko01200	Metabolism	Global and overview maps	219	7.40E-18	1.88E-16	145	3.36E-10	4.10E-09
Carotenoid biosynthesis	ko00906	Metabolism	Metabolism of terpenoids and polyketides	21	0.02629668	8.35E-02	8	0.7346961	1.00E+00
Circadian rhythm - plant	ko04712	Organismal Systems	Environmental adaptation	10	0.9819507	1.00E+00	5	0.9940396	1.00E+00
Citrate cycle (TCA cycle)	ko00020	Metabolism	Carbohydrate metabolism	35	0.1574431	3.39E-01	15	0.9238329	1.00E+00
Cutin, suberine and wax biosynthesis	ko00073	Metabolism	Lipid metabolism	34	1.21E-06	9.59E-06	21	0.000982849	6.66E-03
Cyanoamino acid metabolism	ko00460	Metabolism	Metabolism of other amino acids	58	4.62E-07	3.92E-06	40	5.05E-05	3.85E-04
Cysteine and methionine metabolism	ko00270	Metabolism	Amino acid metabolism	48	0.7839894	1.00E+00	51	0.01159277	4.88E-02
DNA replication	ko03030	Genetic Information Processing	Replication and repair	39	1	1.00E+00	39	0.9997981	1.00E+00
Diterpenoid biosynthesis	ko00904	Metabolism	Metabolism of terpenoids and polyketides	16	0.08442454	2.02E-01	3	0.9862781	1.00E+00
Endocytosis	ko04144	Cellular Processes	Transport and catabolism	53	0.9996529	1.00E+00	40	0.9899586	1.00E+00
Ether lipid metabolism	ko00565	Metabolism	Lipid metabolism	15	0.1963277	4.09E-01	5	0.9217787	1.00E+00
Fatty acid biosynthesis	ko00061	Metabolism	Lipid metabolism	48	1.09E-09	1.07E-08	30	2.45E-05	1.99E-04
Fatty acid degradation	ko00071	Metabolism	Lipid metabolism	42	4.73E-05	3.16E-04	19	0.2271742	6.45E-01
Fatty acid elongation	ko00062	Metabolism	Lipid metabolism	34	0.000152773	8.82E-04	16	0.1811384	5.29E-01
Fatty acid metabolism	ko01212	Metabolism	Global and overview maps	66	1.01E-09	1.07E-08	33	0.008579716	3.88E-02
Flavone and flavonol biosynthesis	ko00944	Metabolism	Biosynthesis of other secondary metabolites	1	0.3849737	6.61E-01	0	1	1
Flavonoid biosynthesis	ko00941	Metabolism	Biosynthesis of other secondary metabolites	13	0.5622466	9.04E-01	10	0.4377692	1.00E+00
Folate biosynthesis	ko00790	Metabolism	Metabolism of cofactors and vitamins	5	0.9651694	1.00E+00	4	0.9015301	1.00E+00
Fructose and mannose metabolism	ko00051	Metabolism	Carbohydrate metabolism	50	6.96E-05	4.21E-04	45	2.60E-07	2.88E-06
Galactose metabolism	ko00052	Metabolism	Carbohydrate metabolism	31	0.04366088	1.18E-01	24	0.02652241	9.81E-02
Glucosinolate biosynthesis	ko00966	Metabolism	Biosynthesis of other secondary metabolites	15	0.274194	5.28E-01	9	0.5202854	1.00E+00
Glutathione metabolism	ko00480	Metabolism	Metabolism of other amino acids	67	0.001794266	8.44E-03	46	0.01264137	5.14E-02
Glycerolipid metabolism	ko00561	Metabolism	Lipid metabolism	51	0.01588017	5.31E-02	29	0.3221607	8.19E-01
Glycerophospholipid metabolism	ko00564	Metabolism	Lipid metabolism	51	0.3012867	5.71E-01	18	0.9989086	1.00E+00
Glycine, serine and threonine metabolism	ko00260	Metabolism	Amino acid metabolism	48	0.006282505	2.49E-02	34	0.01709678	6.73E-02
Glycolysis / Gluconeogenesis	ko00010	Metabolism	Carbohydrate metabolism	93	2.39E-07	2.16E-06	71	3.33E-07	3.39E-06
Glycosaminoglycan degradation	ko00531	Metabolism	Glycan biosynthesis and metabolism	6	0.04902491	1.27E-01	4	0.1200059	3.80E-01
Glycosphingolipid biosynthesis - ganglio series	ko00604	Metabolism	Glycan biosynthesis and metabolism	4	0.008180001	3.15E-02	2	0.1293458	3.95E-01
Glycosphingolipid biosynthesis - globo and isoglobo series	ko00603	Metabolism	Glycan biosynthesis and metabolism	6	0.2055154	4.21E-01	2	0.7809456	1.00E+00
Glyoxylate and dicarboxylate metabolism	ko00630	Metabolism	Carbohydrate metabolism	92	3.23E-15	6.83E-14	44	0.001375831	7.93E-03
Histidine metabolism	ko00340	Metabolism	Amino acid metabolism	10	0.6173858	9.48E-01	6	0.7531918	1.00E+00
Homologous recombination	ko03440	Genetic Information Processing	Replication and repair	51	0.9999997	1.00E+00	32	0.9999988	1.00E+00
Indole alkaloid biosynthesis	ko00901	Metabolism	Biosynthesis of other secondary metabolites	10	0.1109867	2.52E-01	5	0.4821659	1.00E+00
Inositol phosphate metabolism	ko00562	Metabolism	Carbohydrate metabolism	32	0.3661686	6.37E-01	16	0.8938969	1.00E+00
Isoflavonoid biosynthesis	ko00943	Metabolism	Biosynthesis of other secondary metabolites	5	0.0219063	7.13E-02	3	0.112443	3.71E-01
Isoquinoline alkaloid biosynthesis	ko00950	Metabolism	Biosynthesis of other secondary metabolites	15	0.07399594	1.87E-01	14	0.009721522	4.24E-02
Linoleic acid metabolism	ko00591	Metabolism	Lipid metabolism	11	0.03981381	1.12E-01	1	0.9888928	1.00E+00
Lipoic acid metabolism	ko00785	Metabolism	Metabolism of cofactors and vitamins	1	0.794056	1.00E+00	0	1	1
Lysine biosynthesis	ko00300	Metabolism	Amino acid metabolism	3	0.9821224	1.00E+00	13	0.001430047	7.93E-03
Lysine degradation	ko00310	Metabolism	Amino acid metabolism	19	0.3546895	6.26E-01	6	0.9831642	1.00E+00
MAPK signaling pathway - plant	ko04016	Environmental Information Processing	Signal transduction	94	0.008764233	3.27E-02	41	0.9537805	1.00E+00
Metabolic pathways	ko01100	Metabolism	Global and overview maps	1226	6.91E-46	4.39E-44	858	5.21E-32	3.18E-30
Mismatch repair	ko03430	Genetic Information Processing	Replication and repair	40	1	1.00E+00	22	1	1.00E+00
Monobactam biosynthesis	ko00261	Metabolism	Biosynthesis of other secondary metabolites	4	0.8606009	1.00E+00	9	0.0208317	7.94E-02
Monoterpenoid biosynthesis	ko00902	Metabolism	Metabolism of terpenoids and polyketides	2	0.6268843	9.48E-01	0	1	1
N-Glycan biosynthesis	ko00510	Metabolism	Glycan biosynthesis and metabolism	6	0.9999777	1.00E+00	3	0.999956	1.00E+00
Nicotinate and nicotinamide metabolism	ko00760	Metabolism	Metabolism of cofactors and vitamins	5	0.9800206	1.00E+00	6	0.7242041	1.00E+00
Nitrogen metabolism	ko00910	Metabolism	Energy metabolism	26	0.09385475	2.21E-01	13	0.6398815	1.00E+00
Nucleocytoplasmic transport	ko03013	Genetic Information Processing	Translation	23	1	1.00E+00	21	1	1.00E+00
Nucleotide excision repair	ko03420	Genetic Information Processing	Replication and repair	36	1	1.00E+00	22	1	1.00E+00
One carbon pool by folate	ko00670	Metabolism	Metabolism of cofactors and vitamins	10	0.3539244	6.26E-01	8	0.2483029	6.59E-01
Other glycan degradation	ko00511	Metabolism	Glycan biosynthesis and metabolism	12	0.02926507	9.00E-02	4	0.6907599	1.00E+00
Other types of O-glycan biosynthesis	ko00514	Metabolism	Glycan biosynthesis and metabolism	6	0.3902448	6.61E-01	0	1	1
Oxidative phosphorylation	ko00190	Metabolism	Energy metabolism	31	1	1.00E+00	35	0.9984466	1.00E+00
Pantothenate and CoA biosynthesis	ko00770	Metabolism	Metabolism of cofactors and vitamins	6	0.9964855	1.00E+00	4	0.9906177	1.00E+00
Pentose and glucuronate interconversions	ko00040	Metabolism	Carbohydrate metabolism	59	0.07984512	1.95E-01	53	0.00105419	6.68E-03
Pentose phosphate pathway	ko00030	Metabolism	Carbohydrate metabolism	45	6.64E-05	4.21E-04	38	4.39E-06	3.83E-05
Peroxisome	ko04146	Cellular Processes	Transport and catabolism	60	0.001564122	7.64E-03	24	0.8417939	1.00E+00
Phagosome	ko04145	Cellular Processes	Transport and catabolism	48	0.7483094	1.00E+00	42	0.1819986	5.29E-01
Phenylalanine metabolism	ko00360	Metabolism	Amino acid metabolism	27	0.1778524	3.76E-01	17	0.3978485	9.71E-01
Phenylalanine, tyrosine and tryptophan biosynthesis	ko00400	Metabolism	Amino acid metabolism	26	0.2734883	5.28E-01	14	0.7344868	1.00E+00
Phenylpropanoid biosynthesis	ko00940	Metabolism	Biosynthesis of other secondary metabolites	99	0.0015454	7.64E-03	74	0.001094902	6.68E-03
Phosphatidylinositol signaling system	ko04070	Environmental Information Processing	Signal transduction	23	0.9958629	1.00E+00	14	0.9965282	1.00E+00
Photosynthesis	ko00195	Metabolism	Energy metabolism	125	1.32E-48	1.68E-46	110	1.54E-51	1.87E-49
Photosynthesis - antenna proteins	ko00196	Metabolism	Energy metabolism	59	4.20E-37	1.78E-35	42	1.60E-24	4.88E-23
Plant hormone signal transduction	ko04075	Environmental Information Processing	Signal transduction	175	0.003762213	1.65E-02	70	0.9997811	1.00E+00
Plant-pathogen interaction	ko04626	Organismal Systems	Environmental adaptation	159	0.834987	1.00E+00	96	0.9907683	1.00E+00
Porphyrin metabolism	ko00860	Metabolism	Metabolism of cofactors and vitamins	56	2.95E-11	4.17E-10	62	3.42E-22	8.34E-21
Propanoate metabolism	ko00640	Metabolism	Carbohydrate metabolism	22	0.003934713	1.67E-02	10	0.3392478	8.45E-01
Proteasome	ko03050	Genetic Information Processing	Folding, sorting and degradation	5	1	1.00E+00	2	1	1.00E+00
Protein export	ko03060	Genetic Information Processing	Folding, sorting and degradation	14	0.9956328	1.00E+00	15	0.762521	1.00E+00
Protein processing in endoplasmic reticulum	ko04141	Genetic Information Processing	Folding, sorting and degradation	82	0.9566357	1.00E+00	35	0.9999984	1.00E+00
Purine metabolism	ko00230	Metabolism	Nucleotide metabolism	49	0.9953921	1.00E+00	31	0.9966114	1.00E+00
Pyrimidine metabolism	ko00240	Metabolism	Nucleotide metabolism	29	0.9999704	1.00E+00	32	0.8541325	1.00E+00
Pyruvate metabolism	ko00620	Metabolism	Carbohydrate metabolism	56	0.01000638	3.63E-02	26	0.7276746	1.00E+00
RNA degradation	ko03018	Genetic Information Processing	Folding, sorting and degradation	31	0.9999614	1.00E+00	29	0.9678998	1.00E+00
RNA polymerase	ko03020	Genetic Information Processing	Transcription	8	0.9994979	1.00E+00	2	0.9999915	1.00E+00
Riboflavin metabolism	ko00740	Metabolism	Metabolism of cofactors and vitamins	1	0.999403	1.00E+00	4	0.7283194	1.00E+00
Ribosome	ko03010	Genetic Information Processing	Translation	70	1	1.00E+00	181	1.47E-10	1.99E-09
Ribosome biogenesis in eukaryotes	ko03008	Genetic Information Processing	Translation	47	0.312971	5.85E-01	5	1	1.00E+00
SNARE interactions in vesicular transport	ko04130	Genetic Information Processing	Folding, sorting and degradation	8	0.9999589	1.00E+00	8	0.9928931	1.00E+00
Selenocompound metabolism	ko00450	Metabolism	Metabolism of other amino acids	10	0.3381131	6.22E-01	6	0.546118	1.00E+00
Sesquiterpenoid and triterpenoid biosynthesis	ko00909	Metabolism	Metabolism of terpenoids and polyketides	17	0.004173896	1.71E-02	8	0.2483029	6.59E-01
Sphingolipid metabolism	ko00600	Metabolism	Lipid metabolism	9	0.8032508	1.00E+00	7	0.6751848	1.00E+00
Spliceosome	ko03040	Genetic Information Processing	Transcription	27	1	1.00E+00	9	1	1.00E+00
Starch and sucrose metabolism	ko00500	Metabolism	Carbohydrate metabolism	124	1.40E-13	2.54E-12	93	6.44E-12	9.82E-11
Steroid biosynthesis	ko00100	Metabolism	Lipid metabolism	47	5.16E-11	6.55E-10	19	0.03028587	1.09E-01
Stilbenoid, diarylheptanoid and gingerol biosynthesis	ko00945	Metabolism	Biosynthesis of other secondary metabolites	8	0.3436293	6.23E-01	4	0.6907599	1.00E+00
Sulfur metabolism	ko00920	Metabolism	Energy metabolism	11	0.9456162	1.00E+00	10	0.7141696	1.00E+00
Sulfur relay system	ko04122	Genetic Information Processing	Folding, sorting and degradation	1	0.9952631	1.00E+00	1	0.9744187	1.00E+00
Synthesis and degradation of ketone bodies	ko00072	Metabolism	Lipid metabolism	2	0.7107213	1.00E+00	3	0.2328796	6.46E-01
Taurine and hypotaurine metabolism	ko00430	Metabolism	Metabolism of other amino acids	10	0.4499545	7.42E-01	8	0.3190809	8.19E-01
Terpenoid backbone biosynthesis	ko00900	Metabolism	Metabolism of terpenoids and polyketides	35	0.01086175	3.83E-02	14	0.7725582	1.00E+00
Thiamine metabolism	ko00730	Metabolism	Metabolism of cofactors and vitamins	9	0.4763288	7.76E-01	1	0.9979086	1.00E+00
Tropane, piperidine and pyridine alkaloid biosynthesis	ko00960	Metabolism	Biosynthesis of other secondary metabolites	23	0.03552232	1.05E-01	20	0.005705844	2.78E-02
Tryptophan metabolism	ko00380	Metabolism	Amino acid metabolism	50	0.000303195	1.60E-03	27	0.1215615	3.80E-01
Tyrosine metabolism	ko00350	Metabolism	Amino acid metabolism	23	0.1100985	2.52E-01	22	0.005495857	2.78E-02
Ubiquinone and other terpenoid-quinone biosynthesis	ko00130	Metabolism	Metabolism of cofactors and vitamins	17	0.6845546	1.00E+00	8	0.9516566	1.00E+00
Ubiquitin mediated proteolysis	ko04120	Genetic Information Processing	Folding, sorting and degradation	22	1	1.00E+00	21	0.9999928	1.00E+00
Valine, leucine and isoleucine biosynthesis	ko00290	Metabolism	Amino acid metabolism	9	0.8304888	1.00E+00	4	0.9652681	1.00E+00
Valine, leucine and isoleucine degradation	ko00280	Metabolism	Amino acid metabolism	29	0.0409098	1.13E-01	12	0.7945182	1.00E+00
Vitamin B6 metabolism	ko00750	Metabolism	Metabolism of cofactors and vitamins	10	0.1317438	2.88E-01	2	0.9550994	1.00E+00
Zeatin biosynthesis	ko00908	Metabolism	Metabolism of terpenoids and polyketides	4	0.9796699	1.00E+00	3	0.9482554	1.00E+00
alpha-Linolenic acid metabolism	ko00592	Metabolism	Lipid metabolism	39	2.69E-05	1.90E-04	14	0.528789	1.00E+00
beta-Alanine metabolism	ko00410	Metabolism	Metabolism of other amino acids	17	0.7576616	1.00E+00	13	0.606122	1.00E+00
mRNA surveillance pathway	ko03015	Genetic Information Processing	Translation	13	1	1.00E+00	9	1	1.00E+00
