# Supplementary material for: Effects of Low Nighttime Temperature on Fatty Acid Content in Developing Seeds from Brassica napus L. Based on RNA-Seq and Metabolome
Source: Plants (Basel). 2023 Jan 10;12(2):325. doi: 10.3390/plants12020325 (PMC9862530; doi:10.3390/plants12020325)
Supplement: Supplementary file 1 [file plants-12-00325-s001.zip › Table S13.xls]

Table S13 KEGG enrichment on WTSL in LNT.
Pathway	Pathway_ID	KEGG_A_class	KEGG_B_class	SFE13-vs-STE13(647)	SFE13-vs-STE13_Pvalue	SFE13-vs-STE13_Qvalue	SSE13-vs-SFE13(3230)	SSE13-vs-SFE13_Pvalue	SSE13-vs-SFE13_Qvalue
2-Oxocarboxylic acid metabolism	ko01210	Metabolism	Global and overview maps	4	0.9904345	1.00E+00	51	0.4396957	8.33E-01
ABC transporters	ko02010	Environmental Information Processing	Membrane transport	4	0.3452825	8.35E-01	20	0.09575663	2.70E-01
Alanine, aspartate and glutamate metabolism	ko00250	Metabolism	Amino acid metabolism	10	0.1475049	4.38E-01	66	3.82E-08	6.93E-07
Amino sugar and nucleotide sugar metabolism	ko00520	Metabolism	Carbohydrate metabolism	31	0.000186302	2.15E-03	115	3.30E-06	4.19E-05
Aminoacyl-tRNA biosynthesis	ko00970	Genetic Information Processing	Translation	6	0.8160713	1.00E+00	51	0.03807652	1.57E-01
Arachidonic acid metabolism	ko00590	Metabolism	Lipid metabolism	0	1	1	12	0.610945	1.00E+00
Arginine and proline metabolism	ko00330	Metabolism	Amino acid metabolism	8	0.4531294	1.00E+00	41	0.2404236	5.65E-01
Arginine biosynthesis	ko00220	Metabolism	Amino acid metabolism	5	0.4749857	1.00E+00	37	0.001350234	1.22E-02
Ascorbate and aldarate metabolism	ko00053	Metabolism	Carbohydrate metabolism	5	0.73597	1.00E+00	38	0.08742178	2.56E-01
Autophagy - other	ko04136	Cellular Processes	Transport and catabolism	0	1	1	4	1	1.00E+00
Basal transcription factors	ko03022	Genetic Information Processing	Transcription	0	1	1	9	0.9999992	1.00E+00
Base excision repair	ko03410	Genetic Information Processing	Replication and repair	2	0.9405134	1.00E+00	29	0.07944974	2.46E-01
Betalain biosynthesis	ko00965	Metabolism	Biosynthesis of other secondary metabolites	0	1	1	2	0.8327251	1.00E+00
Biosynthesis of amino acids	ko01230	Metabolism	Global and overview maps	22	0.9584773	1.00E+00	175	0.02086547	1.02E-01
Biosynthesis of secondary metabolites	ko01110	Metabolism	Global and overview maps	199	3.77E-10	7.84E-09	826	5.17E-14	3.29E-12
Biosynthesis of unsaturated fatty acids	ko01040	Metabolism	Lipid metabolism	1	0.9608033	1.00E+00	7	0.9975697	1.00E+00
Biotin metabolism	ko00780	Metabolism	Metabolism of cofactors and vitamins	0	1	1	11	0.549763	9.56E-01
Brassinosteroid biosynthesis	ko00905	Metabolism	Metabolism of terpenoids and polyketides	3	0.1296679	4.05E-01	9	0.1638622	4.08E-01
Butanoate metabolism	ko00650	Metabolism	Carbohydrate metabolism	2	0.7496664	1.00E+00	20	0.03683022	1.57E-01
C5-Branched dibasic acid metabolism	ko00660	Metabolism	Carbohydrate metabolism	0	1	1	2	0.9834019	1.00E+00
Caffeine metabolism	ko00232	Metabolism	Biosynthesis of other secondary metabolites	0	1	1	1	0.7750348	1.00E+00
Carbon fixation in photosynthetic organisms	ko00710	Metabolism	Energy metabolism	46	5.34E-19	1.39E-17	92	7.37E-11	2.34E-09
Carbon metabolism	ko01200	Metabolism	Global and overview maps	69	6.61E-09	9.83E-08	197	0.004244409	3.17E-02
Carotenoid biosynthesis	ko00906	Metabolism	Metabolism of terpenoids and polyketides	4	0.4892092	1.00E+00	21	0.2566688	5.82E-01
Circadian rhythm - plant	ko04712	Organismal Systems	Environmental adaptation	4	0.6774007	1.00E+00	9	0.9998725	1.00E+00
Citrate cycle (TCA cycle)	ko00020	Metabolism	Carbohydrate metabolism	2	0.9970133	1.00E+00	26	0.9940108	1.00E+00
Cutin, suberine and wax biosynthesis	ko00073	Metabolism	Lipid metabolism	8	0.03987578	1.80E-01	41	9.51E-07	1.34E-05
Cyanoamino acid metabolism	ko00460	Metabolism	Metabolism of other amino acids	17	0.002931168	2.18E-02	64	5.91E-05	6.25E-04
Cysteine and methionine metabolism	ko00270	Metabolism	Amino acid metabolism	8	0.9735969	1.00E+00	81	0.09828652	2.71E-01
DNA replication	ko03030	Genetic Information Processing	Replication and repair	11	0.9993337	1.00E+00	91	0.9993093	1.00E+00
Diterpenoid biosynthesis	ko00904	Metabolism	Metabolism of terpenoids and polyketides	5	0.1761692	4.95E-01	14	0.6341299	1.00E+00
Endocytosis	ko04144	Cellular Processes	Transport and catabolism	9	0.9992347	1.00E+00	93	0.9211844	1.00E+00
Ether lipid metabolism	ko00565	Metabolism	Lipid metabolism	2	0.8274609	1.00E+00	14	0.723067	1.00E+00
Fatty acid biosynthesis	ko00061	Metabolism	Lipid metabolism	1	0.9947028	1.00E+00	21	0.8681596	1.00E+00
Fatty acid degradation	ko00071	Metabolism	Lipid metabolism	6	0.5618678	1.00E+00	29	0.6159288	1.00E+00
Fatty acid elongation	ko00062	Metabolism	Lipid metabolism	5	0.5213745	1.00E+00	35	0.01110045	6.71E-02
Fatty acid metabolism	ko01212	Metabolism	Global and overview maps	2	0.9978054	1.00E+00	34	0.9002809	1.00E+00
Flavonoid biosynthesis	ko00941	Metabolism	Biosynthesis of other secondary metabolites	8	0.02498964	1.37E-01	25	0.04021927	1.60E-01
Folate biosynthesis	ko00790	Metabolism	Metabolism of cofactors and vitamins	1	0.9221211	1.00E+00	11	0.7256435	1.00E+00
Fructose and mannose metabolism	ko00051	Metabolism	Carbohydrate metabolism	16	0.004899544	3.40E-02	51	0.01984911	1.01E-01
Galactose metabolism	ko00052	Metabolism	Carbohydrate metabolism	15	0.001181421	1.12E-02	42	0.01541248	8.51E-02
Glucosinolate biosynthesis	ko00966	Metabolism	Biosynthesis of other secondary metabolites	2	0.8540855	1.00E+00	18	0.4146477	8.10E-01
Glutathione metabolism	ko00480	Metabolism	Metabolism of other amino acids	15	0.2784611	7.24E-01	69	0.2119685	5.18E-01
Glycerolipid metabolism	ko00561	Metabolism	Lipid metabolism	9	0.683196	1.00E+00	62	0.04621186	1.78E-01
Glycerophospholipid metabolism	ko00564	Metabolism	Lipid metabolism	8	0.9394228	1.00E+00	64	0.4703712	8.78E-01
Glycine, serine and threonine metabolism	ko00260	Metabolism	Amino acid metabolism	14	0.0660685	2.76E-01	54	0.07485139	2.38E-01
Glycolysis / Gluconeogenesis	ko00010	Metabolism	Carbohydrate metabolism	21	0.06623506	2.76E-01	88	0.03821706	1.57E-01
Glycosaminoglycan degradation	ko00531	Metabolism	Glycan biosynthesis and metabolism	2	0.1662055	4.80E-01	7	0.0619479	2.07E-01
Glycosphingolipid biosynthesis - ganglio series	ko00604	Metabolism	Glycan biosynthesis and metabolism	1	0.2201013	5.87E-01	3	0.1097808	2.97E-01
Glycosphingolipid biosynthesis - globo and isoglobo series	ko00603	Metabolism	Glycan biosynthesis and metabolism	3	0.09072083	3.14E-01	7	0.2805871	6.04E-01
Glycosphingolipid biosynthesis - lacto and neolacto series	ko00601	Metabolism	Glycan biosynthesis and metabolism	0	1	1	1	0.9494256	1.00E+00
Glyoxylate and dicarboxylate metabolism	ko00630	Metabolism	Carbohydrate metabolism	23	0.000429313	4.46E-03	68	0.01477904	8.51E-02
Histidine metabolism	ko00340	Metabolism	Amino acid metabolism	4	0.3104887	7.88E-01	15	0.4350663	8.33E-01
Homologous recombination	ko03440	Genetic Information Processing	Replication and repair	9	0.9999291	1.00E+00	92	0.9992919	1.00E+00
Indole alkaloid biosynthesis	ko00901	Metabolism	Biosynthesis of other secondary metabolites	5	0.02993234	1.48E-01	9	0.5129409	9.18E-01
Inositol phosphate metabolism	ko00562	Metabolism	Carbohydrate metabolism	6	0.8132705	1.00E+00	35	0.8226764	1.00E+00
Isoflavonoid biosynthesis	ko00943	Metabolism	Biosynthesis of other secondary metabolites	3	0.00985061	5.69E-02	7	0.003987958	3.17E-02
Isoquinoline alkaloid biosynthesis	ko00950	Metabolism	Biosynthesis of other secondary metabolites	5	0.1324501	4.05E-01	18	0.1162037	3.07E-01
Linoleic acid metabolism	ko00591	Metabolism	Lipid metabolism	1	0.8135977	1.00E+00	4	0.9738424	1.00E+00
Lysine biosynthesis	ko00300	Metabolism	Amino acid metabolism	0	1	1	20	0.000982901	9.60E-03
Lysine degradation	ko00310	Metabolism	Amino acid metabolism	5	0.4867315	1.00E+00	25	0.3500914	7.17E-01
MAPK signaling pathway - plant	ko04016	Environmental Information Processing	Signal transduction	21	0.4218322	9.54E-01	93	0.7561983	1.00E+00
Metabolic pathways	ko01100	Metabolism	Global and overview maps	402	1.60E-38	5.53E-37	1410	7.03E-16	8.93E-14
Mismatch repair	ko03430	Genetic Information Processing	Replication and repair	8	0.9999097	1.00E+00	64	1	1.00E+00
Monobactam biosynthesis	ko00261	Metabolism	Biosynthesis of other secondary metabolites	0	1	1	9	0.3982009	8.03E-01
N-Glycan biosynthesis	ko00510	Metabolism	Glycan biosynthesis and metabolism	0	1	1	14	0.9991009	1.00E+00
Nicotinate and nicotinamide metabolism	ko00760	Metabolism	Metabolism of cofactors and vitamins	0	1	1	16	0.2788135	6.04E-01
Nitrogen metabolism	ko00910	Metabolism	Energy metabolism	4	0.7829865	1.00E+00	21	0.9038693	1.00E+00
Nucleocytoplasmic transport	ko03013	Genetic Information Processing	Translation	5	0.9999972	1.00E+00	81	0.9987379	1.00E+00
Nucleotide excision repair	ko03420	Genetic Information Processing	Replication and repair	8	0.999985	1.00E+00	66	1	1.00E+00
One carbon pool by folate	ko00670	Metabolism	Metabolism of cofactors and vitamins	3	0.4037858	9.33E-01	17	0.05765006	1.99E-01
Other glycan degradation	ko00511	Metabolism	Glycan biosynthesis and metabolism	2	0.5333995	1.00E+00	11	0.265303	5.91E-01
Other types of O-glycan biosynthesis	ko00514	Metabolism	Glycan biosynthesis and metabolism	0	1	1	2	0.9939532	1.00E+00
Oxidative phosphorylation	ko00190	Metabolism	Energy metabolism	14	0.9546378	1.00E+00	58	0.9999999	1.00E+00
Pantothenate and CoA biosynthesis	ko00770	Metabolism	Metabolism of cofactors and vitamins	0	1	1	13	0.9487817	1.00E+00
Pentose and glucuronate interconversions	ko00040	Metabolism	Carbohydrate metabolism	19	0.07091793	2.84E-01	78	0.05692393	1.99E-01
Pentose phosphate pathway	ko00030	Metabolism	Carbohydrate metabolism	14	0.007721373	4.72E-02	48	0.005446193	3.84E-02
Peroxisome	ko04146	Cellular Processes	Transport and catabolism	18	0.02778448	1.44E-01	34	0.9995482	1.00E+00
Phagosome	ko04145	Cellular Processes	Transport and catabolism	16	0.3197563	7.92E-01	69	0.546019	9.56E-01
Phenylalanine metabolism	ko00360	Metabolism	Amino acid metabolism	7	0.392978	9.29E-01	36	0.1342409	3.48E-01
Phenylalanine, tyrosine and tryptophan biosynthesis	ko00400	Metabolism	Amino acid metabolism	5	0.73597	1.00E+00	27	0.7854039	1.00E+00
Phenylpropanoid biosynthesis	ko00940	Metabolism	Biosynthesis of other secondary metabolites	32	0.005503537	3.58E-02	139	1.23E-05	1.42E-04
Phosphatidylinositol signaling system	ko04070	Environmental Information Processing	Signal transduction	9	0.6478035	1.00E+00	42	0.8771598	1.00E+00
Phosphonate and phosphinate metabolism	ko00440	Metabolism	Metabolism of other amino acids	0	1	1	6	0.6117068	1.00E+00
Photosynthesis	ko00195	Metabolism	Energy metabolism	90	1.71E-69	1.78E-67	76	1.39E-08	2.95E-07
Photosynthesis - antenna proteins	ko00196	Metabolism	Energy metabolism	51	3.21E-56	1.67E-54	31	7.14E-07	1.13E-05
Plant hormone signal transduction	ko04075	Environmental Information Processing	Signal transduction	27	0.9835386	1.00E+00	174	0.9425214	1.00E+00
Plant-pathogen interaction	ko04626	Organismal Systems	Environmental adaptation	22	0.9999802	1.00E+00	241	0.1552797	3.94E-01
Porphyrin metabolism	ko00860	Metabolism	Metabolism of cofactors and vitamins	25	1.37E-09	2.38E-08	63	1.46E-09	3.70E-08
Propanoate metabolism	ko00640	Metabolism	Carbohydrate metabolism	1	0.9631763	1.00E+00	13	0.8412514	1.00E+00
Proteasome	ko03050	Genetic Information Processing	Folding, sorting and degradation	0	1	1	12	1	1.00E+00
Protein export	ko03060	Genetic Information Processing	Folding, sorting and degradation	0	1	1	20	0.9971824	1.00E+00
Protein processing in endoplasmic reticulum	ko04141	Genetic Information Processing	Folding, sorting and degradation	16	0.9875512	1.00E+00	110	0.974539	1.00E+00
Purine metabolism	ko00230	Metabolism	Nucleotide metabolism	4	0.9999888	1.00E+00	95	0.3079421	6.52E-01
Pyrimidine metabolism	ko00240	Metabolism	Nucleotide metabolism	8	0.9775007	1.00E+00	83	0.0872531	2.56E-01
Pyruvate metabolism	ko00620	Metabolism	Carbohydrate metabolism	6	0.9652516	1.00E+00	52	0.6841945	1.00E+00
RNA degradation	ko03018	Genetic Information Processing	Folding, sorting and degradation	2	0.9999966	1.00E+00	81	0.2336286	5.60E-01
RNA polymerase	ko03020	Genetic Information Processing	Transcription	1	0.9954708	1.00E+00	11	0.9999088	1.00E+00
Riboflavin metabolism	ko00740	Metabolism	Metabolism of cofactors and vitamins	0	1	1	5	0.966273	1.00E+00
Ribosome	ko03010	Genetic Information Processing	Translation	7	1	1.00E+00	257	0.00187971	1.59E-02
Ribosome biogenesis in eukaryotes	ko03008	Genetic Information Processing	Translation	0	1	1	50	0.8958868	1.00E+00
SNARE interactions in vesicular transport	ko04130	Genetic Information Processing	Folding, sorting and degradation	3	0.9488681	1.00E+00	11	0.9999967	1.00E+00
Selenocompound metabolism	ko00450	Metabolism	Metabolism of other amino acids	1	0.9000537	1.00E+00	13	0.3374611	7.03E-01
Sesquiterpenoid and triterpenoid biosynthesis	ko00909	Metabolism	Metabolism of terpenoids and polyketides	5	0.07963565	2.96E-01	18	0.03117915	1.41E-01
Sphingolipid metabolism	ko00600	Metabolism	Lipid metabolism	5	0.1813343	4.96E-01	21	0.06425254	2.09E-01
Spliceosome	ko03040	Genetic Information Processing	Transcription	3	1	1.00E+00	48	1	1.00E+00
Starch and sucrose metabolism	ko00500	Metabolism	Carbohydrate metabolism	44	1.03E-08	1.34E-07	147	4.94E-12	2.09E-10
Steroid biosynthesis	ko00100	Metabolism	Lipid metabolism	12	0.002258207	1.81E-02	35	0.005945173	3.97E-02
Stilbenoid, diarylheptanoid and gingerol biosynthesis	ko00945	Metabolism	Biosynthesis of other secondary metabolites	5	0.03196228	1.51E-01	15	0.02505535	1.18E-01
Sulfur metabolism	ko00920	Metabolism	Energy metabolism	1	0.988415	1.00E+00	19	0.7788347	1.00E+00
Sulfur relay system	ko04122	Genetic Information Processing	Folding, sorting and degradation	0	1	1	2	0.9939532	1.00E+00
Synthesis and degradation of ketone bodies	ko00072	Metabolism	Lipid metabolism	0	1	1	6	0.08862798	2.56E-01
Taurine and hypotaurine metabolism	ko00430	Metabolism	Metabolism of other amino acids	1	0.9196538	1.00E+00	21	0.008853359	5.62E-02
Terpenoid backbone biosynthesis	ko00900	Metabolism	Metabolism of terpenoids and polyketides	15	0.001750444	1.52E-02	33	0.411562	8.10E-01
Thiamine metabolism	ko00730	Metabolism	Metabolism of cofactors and vitamins	5	0.07614019	2.93E-01	10	0.7113759	1.00E+00
Tropane, piperidine and pyridine alkaloid biosynthesis	ko00960	Metabolism	Biosynthesis of other secondary metabolites	7	0.1241371	4.03E-01	28	0.05785142	1.99E-01
Tryptophan metabolism	ko00380	Metabolism	Amino acid metabolism	8	0.57369	1.00E+00	54	0.0171734	9.09E-02
Tyrosine metabolism	ko00350	Metabolism	Amino acid metabolism	8	0.1009264	3.39E-01	27	0.2468593	5.70E-01
Ubiquinone and other terpenoid-quinone biosynthesis	ko00130	Metabolism	Metabolism of cofactors and vitamins	5	0.5549788	1.00E+00	25	0.5110064	9.18E-01
Ubiquitin mediated proteolysis	ko04120	Genetic Information Processing	Folding, sorting and degradation	6	0.9996348	1.00E+00	57	0.9999305	1.00E+00
Valine, leucine and isoleucine biosynthesis	ko00290	Metabolism	Amino acid metabolism	0	1	1	11	0.9192508	1.00E+00
Valine, leucine and isoleucine degradation	ko00280	Metabolism	Amino acid metabolism	3	0.9198447	1.00E+00	26	0.6759015	1.00E+00
Vitamin B6 metabolism	ko00750	Metabolism	Metabolism of cofactors and vitamins	2	0.5426502	1.00E+00	14	0.05773527	1.99E-01
Zeatin biosynthesis	ko00908	Metabolism	Metabolism of terpenoids and polyketides	2	0.680061	1.00E+00	12	0.498753	9.18E-01
alpha-Linolenic acid metabolism	ko00592	Metabolism	Lipid metabolism	9	0.08710919	3.12E-01	18	0.9772066	1.00E+00
beta-Alanine metabolism	ko00410	Metabolism	Metabolism of other amino acids	2	0.9681111	1.00E+00	23	0.7673175	1.00E+00
mRNA surveillance pathway	ko03015	Genetic Information Processing	Translation	0	1	1	33	1	1.00E+00
