# Supplementary material for: Effects of Low Nighttime Temperature on Fatty Acid Content in Developing Seeds from Brassica napus L. Based on RNA-Seq and Metabolome
Source: Plants (Basel). 2023 Jan 10;12(2):325. doi: 10.3390/plants12020325 (PMC9862530; doi:10.3390/plants12020325)
Supplement: Supplementary file 1 [file plants-12-00325-s001.zip › Table S14.xls]

Table S14 KEGG enrichment on STSL in HNT.
Pathway	Pathway_ID	KEGG_A_class	KEGG_B_class	OFE18-vs-OTE18(1022)	OFE18-vs-OTE18_Pvalue	OFE18-vs-OTE18_Qvalue	OSE18-vs-OFE18(444)	OSE18-vs-OFE18_Pvalue	OSE18-vs-OFE18_Qvalue
2-Oxocarboxylic acid metabolism	ko01210	Metabolism	Global and overview maps	37	1.26E-06	1.18E-05	6	0.6805599	1.00E+00
ABC transporters	ko02010	Environmental Information Processing	Membrane transport	2	0.9517927	1.00E+00	1	0.8728929	1.00E+00
Alanine, aspartate and glutamate metabolism	ko00250	Metabolism	Amino acid metabolism	28	3.74E-06	3.26E-05	10	0.01983809	2.91E-01
Amino sugar and nucleotide sugar metabolism	ko00520	Metabolism	Carbohydrate metabolism	42	0.000407096	2.48E-03	18	0.01998525	2.91E-01
Aminoacyl-tRNA biosynthesis	ko00970	Genetic Information Processing	Translation	5	0.9960748	1.00E+00	2	0.9751045	1.00E+00
Arachidonic acid metabolism	ko00590	Metabolism	Lipid metabolism	6	0.2046269	5.31E-01	2	0.5161565	1.00E+00
Arginine and proline metabolism	ko00330	Metabolism	Amino acid metabolism	24	0.000625286	3.63E-03	8	0.1339857	9.29E-01
Arginine biosynthesis	ko00220	Metabolism	Amino acid metabolism	21	9.15E-06	7.44E-05	5	0.2007935	9.29E-01
Ascorbate and aldarate metabolism	ko00053	Metabolism	Carbohydrate metabolism	12	0.2613428	6.25E-01	5	0.4104669	1.00E+00
Autophagy - other	ko04136	Cellular Processes	Transport and catabolism	1	0.9998708	1.00E+00	3	0.7319579	1.00E+00
Basal transcription factors	ko03022	Genetic Information Processing	Transcription	0	1	1	3	0.7707818	1.00E+00
Base excision repair	ko03410	Genetic Information Processing	Replication and repair	5	0.8395804	1.00E+00	3	0.5944839	1.00E+00
Betalain biosynthesis	ko00965	Metabolism	Biosynthesis of other secondary metabolites	1	0.628801	1.00E+00	0	1	1
Biosynthesis of amino acids	ko01230	Metabolism	Global and overview maps	88	2.54E-08	3.45E-07	24	0.2667329	9.51E-01
Biosynthesis of secondary metabolites	ko01110	Metabolism	Global and overview maps	329	3.02E-19	6.14E-18	85	0.7918198	1.00E+00
Biosynthesis of unsaturated fatty acids	ko01040	Metabolism	Lipid metabolism	10	0.02885215	9.78E-02	5	0.06816192	6.82E-01
Biotin metabolism	ko00780	Metabolism	Metabolism of cofactors and vitamins	5	0.2679358	6.29E-01	0	1	1
Brassinosteroid biosynthesis	ko00905	Metabolism	Metabolism of terpenoids and polyketides	3	0.3180285	6.93E-01	1	0.5813435	1.00E+00
Butanoate metabolism	ko00650	Metabolism	Carbohydrate metabolism	4	0.6113084	1.00E+00	1	0.8427046	1.00E+00
C5-Branched dibasic acid metabolism	ko00660	Metabolism	Carbohydrate metabolism	2	0.5395902	9.54E-01	1	0.5441915	1.00E+00
Carbon fixation in photosynthetic organisms	ko00710	Metabolism	Energy metabolism	63	1.19E-22	3.64E-21	14	0.006171049	2.20E-01
Carbon metabolism	ko01200	Metabolism	Global and overview maps	124	1.43E-19	3.48E-18	29	0.1083836	8.92E-01
Carotenoid biosynthesis	ko00906	Metabolism	Metabolism of terpenoids and polyketides	12	0.01176665	4.95E-02	4	0.2360307	9.29E-01
Circadian rhythm - plant	ko04712	Organismal Systems	Environmental adaptation	8	0.4392212	8.78E-01	2	0.8261102	1.00E+00
Citrate cycle (TCA cycle)	ko00020	Metabolism	Carbohydrate metabolism	18	0.07409239	2.26E-01	6	0.4541557	1.00E+00
Cutin, suberine and wax biosynthesis	ko00073	Metabolism	Lipid metabolism	2	0.9857779	1.00E+00	0	1	1
Cyanoamino acid metabolism	ko00460	Metabolism	Metabolism of other amino acids	21	0.01575868	6.41E-02	5	0.6431176	1.00E+00
Cysteine and methionine metabolism	ko00270	Metabolism	Amino acid metabolism	27	0.1782603	4.83E-01	6	0.9250204	1.00E+00
DNA replication	ko03030	Genetic Information Processing	Replication and repair	16	0.9999921	1.00E+00	7	0.9979248	1.00E+00
Diterpenoid biosynthesis	ko00904	Metabolism	Metabolism of terpenoids and polyketides	7	0.1887385	5.01E-01	3	0.3332551	1.00E+00
Endocytosis	ko04144	Cellular Processes	Transport and catabolism	25	0.950574	1.00E+00	12	0.7874876	1.00E+00
Ether lipid metabolism	ko00565	Metabolism	Lipid metabolism	5	0.5601676	9.76E-01	1	0.8881539	1.00E+00
Fatty acid biosynthesis	ko00061	Metabolism	Lipid metabolism	20	0.000183505	1.24E-03	6	0.1430502	9.29E-01
Fatty acid degradation	ko00071	Metabolism	Lipid metabolism	9	0.6160588	1.00E+00	2	0.9210003	1.00E+00
Fatty acid elongation	ko00062	Metabolism	Lipid metabolism	8	0.4831572	9.11E-01	3	0.6392006	1.00E+00
Fatty acid metabolism	ko01212	Metabolism	Global and overview maps	23	0.005688443	2.78E-02	7	0.332834	1.00E+00
Flavonoid biosynthesis	ko00941	Metabolism	Biosynthesis of other secondary metabolites	6	0.4834098	9.11E-01	0	1	1
Folate biosynthesis	ko00790	Metabolism	Metabolism of cofactors and vitamins	2	0.91147	1.00E+00	0	1	1
Fructose and mannose metabolism	ko00051	Metabolism	Carbohydrate metabolism	29	1.40E-05	1.07E-04	5	0.6123923	1.00E+00
Galactose metabolism	ko00052	Metabolism	Carbohydrate metabolism	18	0.0076443	3.45E-02	4	0.5998237	1.00E+00
Glucosinolate biosynthesis	ko00966	Metabolism	Biosynthesis of other secondary metabolites	11	0.01736442	6.83E-02	2	0.6752268	1.00E+00
Glutathione metabolism	ko00480	Metabolism	Metabolism of other amino acids	39	4.87E-05	3.50E-04	6	0.8650331	1.00E+00
Glycerolipid metabolism	ko00561	Metabolism	Lipid metabolism	13	0.8118888	1.00E+00	8	0.3902741	1.00E+00
Glycerophospholipid metabolism	ko00564	Metabolism	Lipid metabolism	16	0.8501381	1.00E+00	4	0.975349	1.00E+00
Glycine, serine and threonine metabolism	ko00260	Metabolism	Amino acid metabolism	22	0.02675732	9.33E-02	9	0.1628974	9.29E-01
Glycolysis / Gluconeogenesis	ko00010	Metabolism	Carbohydrate metabolism	49	7.35E-07	7.48E-06	8	0.7944147	1.00E+00
Glycosaminoglycan degradation	ko00531	Metabolism	Glycan biosynthesis and metabolism	3	0.1072943	3.19E-01	0	1	1
Glycosphingolipid biosynthesis - ganglio series	ko00604	Metabolism	Glycan biosynthesis and metabolism	1	0.3271894	7.00E-01	0	1	1
Glycosphingolipid biosynthesis - globo and isoglobo series	ko00603	Metabolism	Glycan biosynthesis and metabolism	3	0.2382857	5.93E-01	0	1	1
Glyoxylate and dicarboxylate metabolism	ko00630	Metabolism	Carbohydrate metabolism	43	1.28E-08	1.96E-07	9	0.3010709	9.81E-01
Histidine metabolism	ko00340	Metabolism	Amino acid metabolism	4	0.6551308	1.00E+00	1	0.8586003	1.00E+00
Homologous recombination	ko03440	Genetic Information Processing	Replication and repair	14	0.9999993	1.00E+00	7	0.9981286	1.00E+00
Indole alkaloid biosynthesis	ko00901	Metabolism	Biosynthesis of other secondary metabolites	3	0.5243385	9.41E-01	1	0.7020875	1.00E+00
Inositol phosphate metabolism	ko00562	Metabolism	Carbohydrate metabolism	11	0.721083	1.00E+00	10	0.04969989	5.91E-01
Isoflavonoid biosynthesis	ko00943	Metabolism	Biosynthesis of other secondary metabolites	1	0.5243974	9.41E-01	0	1	1
Isoquinoline alkaloid biosynthesis	ko00950	Metabolism	Biosynthesis of other secondary metabolites	10	0.00987734	4.30E-02	2	0.5542362	1.00E+00
Linoleic acid metabolism	ko00591	Metabolism	Lipid metabolism	2	0.7424242	1.00E+00	0	1	1
Lipoic acid metabolism	ko00785	Metabolism	Metabolism of cofactors and vitamins	0	1	1	1	0.2411053	9.29E-01
Lysine biosynthesis	ko00300	Metabolism	Amino acid metabolism	4	0.3739896	7.60E-01	0	1	1
Lysine degradation	ko00310	Metabolism	Amino acid metabolism	9	0.3008434	6.67E-01	5	0.2082005	9.29E-01
MAPK signaling pathway - plant	ko04016	Environmental Information Processing	Signal transduction	20	0.9896579	1.00E+00	8	0.9638829	1.00E+00
Metabolic pathways	ko01100	Metabolism	Global and overview maps	577	4.15E-37	2.53E-35	190	0.009688337	2.38E-01
Mismatch repair	ko03430	Genetic Information Processing	Replication and repair	14	0.9999936	1.00E+00	7	0.9953339	1.00E+00
Monobactam biosynthesis	ko00261	Metabolism	Biosynthesis of other secondary metabolites	6	0.03854522	1.24E-01	0	1	1
N-Glycan biosynthesis	ko00510	Metabolism	Glycan biosynthesis and metabolism	2	0.9986185	1.00E+00	3	0.7285007	1.00E+00
Nicotinate and nicotinamide metabolism	ko00760	Metabolism	Metabolism of cofactors and vitamins	2	0.9331725	1.00E+00	6	0.01112937	2.38E-01
Nitrogen metabolism	ko00910	Metabolism	Energy metabolism	10	0.3328108	7.00E-01	5	0.302663	9.81E-01
Non-homologous end-joining	ko03450	Genetic Information Processing	Replication and repair	1	0.628801	1.00E+00	0	1	1
Nucleocytoplasmic transport	ko03013	Genetic Information Processing	Translation	12	0.999998	1.00E+00	11	0.880426	1.00E+00
Nucleotide excision repair	ko03420	Genetic Information Processing	Replication and repair	13	0.9999999	1.00E+00	8	0.9958207	1.00E+00
One carbon pool by folate	ko00670	Metabolism	Metabolism of cofactors and vitamins	6	0.1540554	4.29E-01	1	0.7968985	1.00E+00
Other glycan degradation	ko00511	Metabolism	Glycan biosynthesis and metabolism	2	0.777326	1.00E+00	0	1	1
Oxidative phosphorylation	ko00190	Metabolism	Energy metabolism	16	0.9996923	1.00E+00	10	0.9045086	1.00E+00
Pantothenate and CoA biosynthesis	ko00770	Metabolism	Metabolism of cofactors and vitamins	1	0.9977795	1.00E+00	4	0.258858	9.51E-01
Pentose and glucuronate interconversions	ko00040	Metabolism	Carbohydrate metabolism	20	0.6025047	1.00E+00	10	0.4161792	1.00E+00
Pentose phosphate pathway	ko00030	Metabolism	Carbohydrate metabolism	30	2.62E-07	2.91E-06	4	0.6779943	1.00E+00
Peroxisome	ko04146	Cellular Processes	Transport and catabolism	15	0.7507708	1.00E+00	11	0.1349645	9.29E-01
Phagosome	ko04145	Cellular Processes	Transport and catabolism	36	0.002657647	1.36E-02	8	0.7422728	1.00E+00
Phenylalanine metabolism	ko00360	Metabolism	Amino acid metabolism	13	0.1548291	4.29E-01	3	0.7826602	1.00E+00
Phenylalanine, tyrosine and tryptophan biosynthesis	ko00400	Metabolism	Amino acid metabolism	21	0.000711013	3.94E-03	5	0.4104669	1.00E+00
Phenylpropanoid biosynthesis	ko00940	Metabolism	Biosynthesis of other secondary metabolites	36	0.2121475	5.39E-01	15	0.3841845	1.00E+00
Phosphatidylinositol signaling system	ko04070	Environmental Information Processing	Signal transduction	6	0.9984138	1.00E+00	8	0.3585067	1.00E+00
Phosphonate and phosphinate metabolism	ko00440	Metabolism	Metabolism of other amino acids	1	0.8690082	1.00E+00	0	1	1
Photosynthesis	ko00195	Metabolism	Energy metabolism	78	5.86E-40	7.15E-38	19	3.48E-06	1.86E-04
Photosynthesis - antenna proteins	ko00196	Metabolism	Energy metabolism	42	3.01E-33	1.22E-31	12	1.59E-07	1.70E-05
Plant hormone signal transduction	ko04075	Environmental Information Processing	Signal transduction	35	0.9999431	1.00E+00	18	0.971637	1.00E+00
Plant-pathogen interaction	ko04626	Organismal Systems	Environmental adaptation	51	0.9973594	1.00E+00	15	0.99971	1.00E+00
Porphyrin metabolism	ko00860	Metabolism	Metabolism of cofactors and vitamins	32	1.08E-09	1.87E-08	9	0.02173273	2.91E-01
Propanoate metabolism	ko00640	Metabolism	Carbohydrate metabolism	7	0.2521975	6.15E-01	4	0.1835876	9.29E-01
Proteasome	ko03050	Genetic Information Processing	Folding, sorting and degradation	2	0.9999573	1.00E+00	6	0.4467641	1.00E+00
Protein export	ko03060	Genetic Information Processing	Folding, sorting and degradation	11	0.485418	9.11E-01	4	0.6745249	1.00E+00
Protein processing in endoplasmic reticulum	ko04141	Genetic Information Processing	Folding, sorting and degradation	54	0.02271017	8.40E-02	14	0.8527389	1.00E+00
Purine metabolism	ko00230	Metabolism	Nucleotide metabolism	23	0.8833494	1.00E+00	9	0.8760262	1.00E+00
Pyrimidine metabolism	ko00240	Metabolism	Nucleotide metabolism	14	0.9835226	1.00E+00	9	0.6591431	1.00E+00
Pyruvate metabolism	ko00620	Metabolism	Carbohydrate metabolism	24	0.06840058	2.14E-01	8	0.4821766	1.00E+00
RNA degradation	ko03018	Genetic Information Processing	Folding, sorting and degradation	9	0.9998741	1.00E+00	15	0.09442852	8.42E-01
RNA polymerase	ko03020	Genetic Information Processing	Transcription	5	0.9250592	1.00E+00	2	0.881093	1.00E+00
Riboflavin metabolism	ko00740	Metabolism	Metabolism of cofactors and vitamins	0	1	1	1	0.726392	1.00E+00
Ribosome	ko03010	Genetic Information Processing	Translation	22	1	1.00E+00	34	0.2432248	9.29E-01
Ribosome biogenesis in eukaryotes	ko03008	Genetic Information Processing	Translation	8	0.998279	1.00E+00	10	0.2806639	9.69E-01
SNARE interactions in vesicular transport	ko04130	Genetic Information Processing	Folding, sorting and degradation	1	0.999957	1.00E+00	4	0.615557	1.00E+00
Selenocompound metabolism	ko00450	Metabolism	Metabolism of other amino acids	5	0.2867056	6.60E-01	4	0.07016013	6.82E-01
Sesquiterpenoid and triterpenoid biosynthesis	ko00909	Metabolism	Metabolism of terpenoids and polyketides	5	0.2961806	6.67E-01	3	0.2086824	9.29E-01
Sphingolipid metabolism	ko00600	Metabolism	Lipid metabolism	5	0.5155945	9.41E-01	0	1	1
Spliceosome	ko03040	Genetic Information Processing	Transcription	15	0.9999712	1.00E+00	13	0.7539743	1.00E+00
Starch and sucrose metabolism	ko00500	Metabolism	Carbohydrate metabolism	57	7.87E-08	9.60E-07	9	0.8301868	1.00E+00
Steroid biosynthesis	ko00100	Metabolism	Lipid metabolism	18	0.000342641	2.20E-03	5	0.2082005	9.29E-01
Stilbenoid, diarylheptanoid and gingerol biosynthesis	ko00945	Metabolism	Biosynthesis of other secondary metabolites	2	0.777326	1.00E+00	0	1	1
Sulfur metabolism	ko00920	Metabolism	Energy metabolism	13	0.02128988	8.12E-02	3	0.580389	1.00E+00
Sulfur relay system	ko04122	Genetic Information Processing	Folding, sorting and degradation	0	1	1	2	0.2358447	9.29E-01
Synthesis and degradation of ketone bodies	ko00072	Metabolism	Lipid metabolism	1	0.6467549	1.00E+00	0	1	1
Taurine and hypotaurine metabolism	ko00430	Metabolism	Metabolism of other amino acids	5	0.3538618	7.32E-01	2	0.5096036	1.00E+00
Terpenoid backbone biosynthesis	ko00900	Metabolism	Metabolism of terpenoids and polyketides	14	0.1256868	3.65E-01	3	0.8101449	1.00E+00
Thiamine metabolism	ko00730	Metabolism	Metabolism of cofactors and vitamins	8	0.0260918	9.33E-02	3	0.2032529	9.29E-01
Tropane, piperidine and pyridine alkaloid biosynthesis	ko00960	Metabolism	Biosynthesis of other secondary metabolites	14	0.006159029	2.89E-02	2	0.782328	1.00E+00
Tryptophan metabolism	ko00380	Metabolism	Amino acid metabolism	24	0.002672621	1.36E-02	4	0.8146798	1.00E+00
Tyrosine metabolism	ko00350	Metabolism	Amino acid metabolism	13	0.03609159	1.19E-01	2	0.83708	1.00E+00
Ubiquinone and other terpenoid-quinone biosynthesis	ko00130	Metabolism	Metabolism of cofactors and vitamins	7	0.671849	1.00E+00	1	0.9682653	1.00E+00
Ubiquitin mediated proteolysis	ko04120	Genetic Information Processing	Folding, sorting and degradation	10	0.9999768	1.00E+00	11	0.6564779	1.00E+00
Valine, leucine and isoleucine biosynthesis	ko00290	Metabolism	Amino acid metabolism	2	0.9591321	1.00E+00	2	0.6292724	1.00E+00
Valine, leucine and isoleucine degradation	ko00280	Metabolism	Amino acid metabolism	6	0.8784915	1.00E+00	4	0.5332291	1.00E+00
Vitamin B6 metabolism	ko00750	Metabolism	Metabolism of cofactors and vitamins	2	0.7853784	1.00E+00	2	0.3522825	1.00E+00
Zeatin biosynthesis	ko00908	Metabolism	Metabolism of terpenoids and polyketides	1	0.9769707	1.00E+00	0	1	1
alpha-Linolenic acid metabolism	ko00592	Metabolism	Lipid metabolism	9	0.4658004	9.11E-01	4	0.4979582	1.00E+00
beta-Alanine metabolism	ko00410	Metabolism	Metabolism of other amino acids	4	0.9669926	1.00E+00	6	0.1487345	9.29E-01
mRNA surveillance pathway	ko03015	Genetic Information Processing	Translation	8	0.9999914	1.00E+00	9	0.7852632	1.00E+00
