# Supplementary material for: Effects of Low Nighttime Temperature on Fatty Acid Content in Developing Seeds from Brassica napus L. Based on RNA-Seq and Metabolome
Source: Plants (Basel). 2023 Jan 10;12(2):325. doi: 10.3390/plants12020325 (PMC9862530; doi:10.3390/plants12020325)
Supplement: Supplementary file 1 [file plants-12-00325-s001.zip › Table S15.xls]

Table S15 KEGG enrichment on STSL in LNT.
Pathway	Pathway_ID	KEGG_A_class	KEGG_B_class	OFE13-vs-OTE13(778)	OFE13-vs-OTE13_Pvalue	OFE13-vs-OTE13_Qvalue	OSE13-vs-OFE13(1655)	OSE13-vs-OFE13_Pvalue	OSE13-vs-OFE13_Qvalue
2-Oxocarboxylic acid metabolism	ko01210	Metabolism	Global and overview maps	16	0.1465356	4.27E-01	26	0.4829492	9.98E-01
ABC transporters	ko02010	Environmental Information Processing	Membrane transport	5	0.2856886	6.03E-01	5	0.8849632	1.00E+00
Alanine, aspartate and glutamate metabolism	ko00250	Metabolism	Amino acid metabolism	20	0.000230188	2.69E-03	27	0.01563712	1.14E-01
Amino sugar and nucleotide sugar metabolism	ko00520	Metabolism	Carbohydrate metabolism	33	0.000998086	1.05E-02	74	8.93E-08	3.69E-06
Aminoacyl-tRNA biosynthesis	ko00970	Genetic Information Processing	Translation	6	0.9230465	1.00E+00	30	0.02298708	1.37E-01
Arachidonic acid metabolism	ko00590	Metabolism	Lipid metabolism	2	0.8093993	1.00E+00	7	0.4630621	9.97E-01
Arginine and proline metabolism	ko00330	Metabolism	Amino acid metabolism	14	0.06082861	2.37E-01	24	0.1284769	5.22E-01
Arginine biosynthesis	ko00220	Metabolism	Amino acid metabolism	14	0.001148598	1.10E-02	15	0.1823309	6.46E-01
Ascorbate and aldarate metabolism	ko00053	Metabolism	Carbohydrate metabolism	7	0.6064968	9.65E-01	21	0.1030365	4.56E-01
Autophagy - other	ko04136	Cellular Processes	Transport and catabolism	1	0.9988585	1.00E+00	4	0.9997061	1.00E+00
Basal transcription factors	ko03022	Genetic Information Processing	Transcription	0	1	1	8	0.9856879	1.00E+00
Base excision repair	ko03410	Genetic Information Processing	Replication and repair	7	0.2915324	6.03E-01	19	0.01958282	1.28E-01
Biosynthesis of amino acids	ko01230	Metabolism	Global and overview maps	41	0.2423064	5.78E-01	75	0.6459599	1.00E+00
Biosynthesis of secondary metabolites	ko01110	Metabolism	Global and overview maps	212	3.46E-06	6.05E-05	419	7.11E-07	2.20E-05
Biosynthesis of unsaturated fatty acids	ko01040	Metabolism	Lipid metabolism	2	0.8997059	1.00E+00	1	0.9997957	1.00E+00
Biotin metabolism	ko00780	Metabolism	Metabolism of cofactors and vitamins	3	0.4969592	8.58E-01	3	0.9280175	1.00E+00
Brassinosteroid biosynthesis	ko00905	Metabolism	Metabolism of terpenoids and polyketides	0	1	1	10	0.000990941	1.37E-02
Butanoate metabolism	ko00650	Metabolism	Carbohydrate metabolism	4	0.3984384	7.34E-01	9	0.2395451	6.76E-01
C5-Branched dibasic acid metabolism	ko00660	Metabolism	Carbohydrate metabolism	0	1	1	1	0.9510769	1.00E+00
Carbon fixation in photosynthetic organisms	ko00710	Metabolism	Energy metabolism	41	1.26E-12	2.64E-11	40	0.001227444	1.52E-02
Carbon metabolism	ko01200	Metabolism	Global and overview maps	66	4.13E-05	6.20E-04	91	0.2522758	6.80E-01
Carotenoid biosynthesis	ko00906	Metabolism	Metabolism of terpenoids and polyketides	10	0.01179326	7.74E-02	12	0.212184	6.58E-01
Circadian rhythm - plant	ko04712	Organismal Systems	Environmental adaptation	0	1	1	11	0.6331347	1.00E+00
Citrate cycle (TCA cycle)	ko00020	Metabolism	Carbohydrate metabolism	5	0.9619848	1.00E+00	18	0.722229	1.00E+00
Cutin, suberine and wax biosynthesis	ko00073	Metabolism	Lipid metabolism	29	1.44E-15	3.79E-14	20	0.001845031	1.91E-02
Cyanoamino acid metabolism	ko00460	Metabolism	Metabolism of other amino acids	15	0.05954964	2.37E-01	39	7.07E-05	1.25E-03
Cysteine and methionine metabolism	ko00270	Metabolism	Amino acid metabolism	11	0.9554159	1.00E+00	37	0.4663331	9.97E-01
DNA replication	ko03030	Genetic Information Processing	Replication and repair	25	0.8160066	1.00E+00	61	0.5803881	1.00E+00
Diterpenoid biosynthesis	ko00904	Metabolism	Metabolism of terpenoids and polyketides	5	0.2856886	6.03E-01	7	0.6433058	1.00E+00
Endocytosis	ko04144	Cellular Processes	Transport and catabolism	14	0.9958814	1.00E+00	56	0.4114356	9.45E-01
Ether lipid metabolism	ko00565	Metabolism	Lipid metabolism	4	0.5276478	8.66E-01	13	0.05839895	2.77E-01
Fatty acid biosynthesis	ko00061	Metabolism	Lipid metabolism	9	0.1673043	4.75E-01	1	0.9999989	1.00E+00
Fatty acid degradation	ko00071	Metabolism	Lipid metabolism	14	0.01444743	8.41E-02	5	0.9995822	1.00E+00
Fatty acid elongation	ko00062	Metabolism	Lipid metabolism	13	0.005115011	3.58E-02	15	0.2393685	6.76E-01
Fatty acid metabolism	ko01212	Metabolism	Global and overview maps	9	0.656415	9.85E-01	6	0.9999813	1.00E+00
Flavonoid biosynthesis	ko00941	Metabolism	Biosynthesis of other secondary metabolites	5	0.4169797	7.55E-01	9	0.5499278	1.00E+00
Folate biosynthesis	ko00790	Metabolism	Metabolism of cofactors and vitamins	0	1	1	6	0.6277042	1.00E+00
Fructose and mannose metabolism	ko00051	Metabolism	Carbohydrate metabolism	11	0.3241726	6.30E-01	22	0.3275413	8.29E-01
Galactose metabolism	ko00052	Metabolism	Carbohydrate metabolism	11	0.1147651	3.74E-01	19	0.2080514	6.58E-01
Glucosinolate biosynthesis	ko00966	Metabolism	Biosynthesis of other secondary metabolites	9	0.02021484	1.01E-01	10	0.3586629	8.72E-01
Glutathione metabolism	ko00480	Metabolism	Metabolism of other amino acids	19	0.1829833	4.93E-01	37	0.2078458	6.58E-01
Glycerolipid metabolism	ko00561	Metabolism	Lipid metabolism	19	0.0369267	1.62E-01	29	0.2834764	7.46E-01
Glycerophospholipid metabolism	ko00564	Metabolism	Lipid metabolism	24	0.01901067	9.98E-02	30	0.6924571	1.00E+00
Glycine, serine and threonine metabolism	ko00260	Metabolism	Amino acid metabolism	8	0.8460545	1.00E+00	25	0.3489612	8.65E-01
Glycolysis / Gluconeogenesis	ko00010	Metabolism	Carbohydrate metabolism	20	0.31863	6.30E-01	36	0.6357241	1.00E+00
Glycosaminoglycan degradation	ko00531	Metabolism	Glycan biosynthesis and metabolism	2	0.2203533	5.58E-01	3	0.2887886	7.46E-01
Glycosphingolipid biosynthesis - ganglio series	ko00604	Metabolism	Glycan biosynthesis and metabolism	1	0.2590918	6.03E-01	2	0.1250035	5.22E-01
Glycosphingolipid biosynthesis - globo and isoglobo series	ko00603	Metabolism	Glycan biosynthesis and metabolism	3	0.1367515	4.22E-01	5	0.1347484	5.22E-01
Glycosphingolipid biosynthesis - lacto and neolacto series	ko00601	Metabolism	Glycan biosynthesis and metabolism	0	1	1	1	0.7694502	1.00E+00
Glyoxylate and dicarboxylate metabolism	ko00630	Metabolism	Carbohydrate metabolism	28	8.40E-05	1.10E-03	37	0.03157319	1.61E-01
Histidine metabolism	ko00340	Metabolism	Amino acid metabolism	4	0.4399243	7.83E-01	4	0.9361128	1.00E+00
Homologous recombination	ko03440	Genetic Information Processing	Replication and repair	14	0.9996171	1.00E+00	59	0.7082909	1.00E+00
Indole alkaloid biosynthesis	ko00901	Metabolism	Biosynthesis of other secondary metabolites	2	0.6252126	9.80E-01	3	0.8336426	1.00E+00
Inositol phosphate metabolism	ko00562	Metabolism	Carbohydrate metabolism	6	0.9214161	1.00E+00	19	0.6627587	1.00E+00
Isoflavonoid biosynthesis	ko00943	Metabolism	Biosynthesis of other secondary metabolites	0	1	1	4	0.02535456	1.43E-01
Isoquinoline alkaloid biosynthesis	ko00950	Metabolism	Biosynthesis of other secondary metabolites	5	0.2230989	5.58E-01	8	0.3834614	9.14E-01
Linoleic acid metabolism	ko00591	Metabolism	Lipid metabolism	2	0.5956703	9.62E-01	6	0.2454696	6.76E-01
Lysine biosynthesis	ko00300	Metabolism	Amino acid metabolism	1	0.9094879	1.00E+00	9	0.06038635	2.77E-01
Lysine degradation	ko00310	Metabolism	Amino acid metabolism	4	0.8065803	1.00E+00	13	0.3925989	9.19E-01
MAPK signaling pathway - plant	ko04016	Environmental Information Processing	Signal transduction	34	0.02414997	1.15E-01	52	0.4408159	9.94E-01
Metabolic pathways	ko01100	Metabolism	Global and overview maps	413	6.95E-20	2.43E-18	739	1.28E-10	1.59E-08
Mismatch repair	ko03430	Genetic Information Processing	Replication and repair	13	0.9993305	1.00E+00	38	0.9985512	1.00E+00
Monobactam biosynthesis	ko00261	Metabolism	Biosynthesis of other secondary metabolites	0	1	1	6	0.2193059	6.63E-01
N-Glycan biosynthesis	ko00510	Metabolism	Glycan biosynthesis and metabolism	0	1	1	5	0.998722	1.00E+00
Nicotinate and nicotinamide metabolism	ko00760	Metabolism	Metabolism of cofactors and vitamins	1	0.9646578	1.00E+00	3	0.9741485	1.00E+00
Nitrogen metabolism	ko00910	Metabolism	Energy metabolism	14	0.005115228	3.58E-02	13	0.6102642	1.00E+00
Nucleocytoplasmic transport	ko03013	Genetic Information Processing	Translation	3	1	1.00E+00	34	0.9995303	1.00E+00
Nucleotide excision repair	ko03420	Genetic Information Processing	Replication and repair	13	0.9998906	1.00E+00	38	0.9999064	1.00E+00
One carbon pool by folate	ko00670	Metabolism	Metabolism of cofactors and vitamins	3	0.5244305	8.66E-01	11	0.03102298	1.61E-01
Other glycan degradation	ko00511	Metabolism	Glycan biosynthesis and metabolism	3	0.3600997	6.75E-01	7	0.1657222	6.04E-01
Other types of O-glycan biosynthesis	ko00514	Metabolism	Glycan biosynthesis and metabolism	0	1	1	2	0.868955	1.00E+00
Oxidative phosphorylation	ko00190	Metabolism	Energy metabolism	9	0.9999441	1.00E+00	39	0.9846201	1.00E+00
Pantothenate and CoA biosynthesis	ko00770	Metabolism	Metabolism of cofactors and vitamins	0	1	1	8	0.7555566	1.00E+00
Pentose and glucuronate interconversions	ko00040	Metabolism	Carbohydrate metabolism	23	0.04769663	2.00E-01	47	0.01256019	1.04E-01
Pentose phosphate pathway	ko00030	Metabolism	Carbohydrate metabolism	12	0.1107879	3.74E-01	17	0.5503887	1.00E+00
Peroxisome	ko04146	Cellular Processes	Transport and catabolism	19	0.0712345	2.67E-01	17	0.9924219	1.00E+00
Phagosome	ko04145	Cellular Processes	Transport and catabolism	22	0.1176347	3.74E-01	41	0.1920372	6.58E-01
Phenylalanine metabolism	ko00360	Metabolism	Amino acid metabolism	5	0.8515058	1.00E+00	13	0.7710752	1.00E+00
Phenylalanine, tyrosine and tryptophan biosynthesis	ko00400	Metabolism	Amino acid metabolism	9	0.3163775	6.30E-01	10	0.9558127	1.00E+00
Phenylpropanoid biosynthesis	ko00940	Metabolism	Biosynthesis of other secondary metabolites	35	0.01522045	8.41E-02	80	2.95E-05	7.31E-04
Phosphatidylinositol signaling system	ko04070	Environmental Information Processing	Signal transduction	4	0.9977182	1.00E+00	15	0.9906619	1.00E+00
Phosphonate and phosphinate metabolism	ko00440	Metabolism	Metabolism of other amino acids	0	1	1	1	0.9647064	1.00E+00
Photosynthesis	ko00195	Metabolism	Energy metabolism	68	3.00E-38	3.15E-36	34	0.002818014	2.68E-02
Photosynthesis - antenna proteins	ko00196	Metabolism	Energy metabolism	40	2.85E-35	1.50E-33	9	0.1999677	6.58E-01
Plant hormone signal transduction	ko04075	Environmental Information Processing	Signal transduction	59	0.03506989	1.60E-01	92	0.7843886	1.00E+00
Plant-pathogen interaction	ko04626	Organismal Systems	Environmental adaptation	55	0.5016697	8.58E-01	114	0.6053768	1.00E+00
Porphyrin metabolism	ko00860	Metabolism	Metabolism of cofactors and vitamins	16	0.002246623	1.97E-02	32	4.57E-05	9.44E-04
Propanoate metabolism	ko00640	Metabolism	Carbohydrate metabolism	3	0.7529457	1.00E+00	3	0.9912288	1.00E+00
Proteasome	ko03050	Genetic Information Processing	Folding, sorting and degradation	0	1	1	10	0.9962256	1.00E+00
Protein export	ko03060	Genetic Information Processing	Folding, sorting and degradation	0	1	1	10	0.9792069	1.00E+00
Protein processing in endoplasmic reticulum	ko04141	Genetic Information Processing	Folding, sorting and degradation	11	0.9999943	1.00E+00	58	0.8733643	1.00E+00
Purine metabolism	ko00230	Metabolism	Nucleotide metabolism	11	0.9967157	1.00E+00	43	0.7150334	1.00E+00
Pyrimidine metabolism	ko00240	Metabolism	Nucleotide metabolism	11	0.9621531	1.00E+00	54	0.003021671	2.68E-02
Pyruvate metabolism	ko00620	Metabolism	Carbohydrate metabolism	12	0.6733044	9.96E-01	15	0.9982236	1.00E+00
RNA degradation	ko03018	Genetic Information Processing	Folding, sorting and degradation	6	0.9997643	1.00E+00	24	0.9962944	1.00E+00
RNA polymerase	ko03020	Genetic Information Processing	Transcription	1	0.9985127	1.00E+00	4	0.999533	1.00E+00
Riboflavin metabolism	ko00740	Metabolism	Metabolism of cofactors and vitamins	0	1	1	1	0.9931105	1.00E+00
Ribosome	ko03010	Genetic Information Processing	Translation	12	1	1.00E+00	85	0.9978751	1.00E+00
Ribosome biogenesis in eukaryotes	ko03008	Genetic Information Processing	Translation	1	0.9999994	1.00E+00	15	0.9993505	1.00E+00
SNARE interactions in vesicular transport	ko04130	Genetic Information Processing	Folding, sorting and degradation	4	0.9422361	1.00E+00	10	0.959249	1.00E+00
Selenocompound metabolism	ko00450	Metabolism	Metabolism of other amino acids	1	0.9378558	1.00E+00	6	0.5256888	1.00E+00
Sesquiterpenoid and triterpenoid biosynthesis	ko00909	Metabolism	Metabolism of terpenoids and polyketides	5	0.1420246	4.26E-01	9	0.1304348	5.22E-01
Sphingolipid metabolism	ko00600	Metabolism	Lipid metabolism	5	0.2928519	6.03E-01	11	0.1433926	5.39E-01
Spliceosome	ko03040	Genetic Information Processing	Transcription	3	1	1.00E+00	20	1	1.00E+00
Starch and sucrose metabolism	ko00500	Metabolism	Carbohydrate metabolism	31	0.01503726	8.41E-02	87	3.70E-10	2.29E-08
Steroid biosynthesis	ko00100	Metabolism	Lipid metabolism	13	0.003670708	2.96E-02	24	0.000610644	9.46E-03
Stilbenoid, diarylheptanoid and gingerol biosynthesis	ko00945	Metabolism	Biosynthesis of other secondary metabolites	3	0.3600997	6.75E-01	5	0.4794501	9.98E-01
Sulfur metabolism	ko00920	Metabolism	Energy metabolism	2	0.969987	1.00E+00	8	0.879587	1.00E+00
Synthesis and degradation of ketone bodies	ko00072	Metabolism	Lipid metabolism	0	1	1	1	0.8194889	1.00E+00
Taurine and hypotaurine metabolism	ko00430	Metabolism	Metabolism of other amino acids	5	0.1777355	4.91E-01	12	0.02326306	1.37E-01
Terpenoid backbone biosynthesis	ko00900	Metabolism	Metabolism of terpenoids and polyketides	7	0.6374035	9.80E-01	24	0.03249885	1.61E-01
Thiamine metabolism	ko00730	Metabolism	Metabolism of cofactors and vitamins	4	0.2894671	6.03E-01	6	0.5256888	1.00E+00
Tropane, piperidine and pyridine alkaloid biosynthesis	ko00960	Metabolism	Biosynthesis of other secondary metabolites	7	0.234946	5.74E-01	18	0.0193944	1.28E-01
Tryptophan metabolism	ko00380	Metabolism	Amino acid metabolism	14	0.1173565	3.74E-01	35	0.001829522	1.91E-02
Tyrosine metabolism	ko00350	Metabolism	Amino acid metabolism	9	0.1153618	3.74E-01	11	0.6675682	1.00E+00
Ubiquinone and other terpenoid-quinone biosynthesis	ko00130	Metabolism	Metabolism of cofactors and vitamins	0	1	1	11	0.7305514	1.00E+00
Ubiquitin mediated proteolysis	ko04120	Genetic Information Processing	Folding, sorting and degradation	9	0.9991644	1.00E+00	34	0.9654465	1.00E+00
Valine, leucine and isoleucine biosynthesis	ko00290	Metabolism	Amino acid metabolism	0	1	1	6	0.8115449	1.00E+00
Valine, leucine and isoleucine degradation	ko00280	Metabolism	Amino acid metabolism	7	0.5063698	8.58E-01	8	0.9770477	1.00E+00
Vitamin B6 metabolism	ko00750	Metabolism	Metabolism of cofactors and vitamins	2	0.6439609	9.80E-01	10	0.01543807	1.14E-01
Zeatin biosynthesis	ko00908	Metabolism	Metabolism of terpenoids and polyketides	0	1	1	8	0.2424306	6.76E-01
alpha-Linolenic acid metabolism	ko00592	Metabolism	Lipid metabolism	9	0.192444	5.05E-01	13	0.6102642	1.00E+00
beta-Alanine metabolism	ko00410	Metabolism	Metabolism of other amino acids	8	0.2890922	6.03E-01	14	0.4616067	9.97E-01
mRNA surveillance pathway	ko03015	Genetic Information Processing	Translation	2	1	1.00E+00	16	0.9999992	1.00E+00
