# Supplementary material for: Effects of Low Nighttime Temperature on Fatty Acid Content in Developing Seeds from Brassica napus L. Based on RNA-Seq and Metabolome
Source: Plants (Basel). 2023 Jan 10;12(2):325. doi: 10.3390/plants12020325 (PMC9862530; doi:10.3390/plants12020325)
Supplement: Supplementary file 1 [file plants-12-00325-s001.zip › Table S16.xlsx]

## Sheet: Table S16
	Table S16 The Primer design of genes
	Gene ID	Primer	Primer sequence(5'-3')	Base number	Total OD value
	1	BnACTIN7F	CCCTGGAATTGCTGACCGTA	22	2
	2	BnACTIN7R	TGGAAAGTGCTGAGGGATGC	22	2
	9	LOC106436165F	GTCCGAGGTGTGATTCCGTC	20	2
	10	LOC106436165R	TGGAAACGCCGTTGCAGG	18	2
	11	LOC106383445F	TGAACTCAAGCAGGGCTACA	20	2
	12	LOC106383445R	TCTCCTTGTAGCCAGTAGGGTAA	23	2
	13	LOC106390324F	TCCCATCGAAACGTCATCGT	20	2
	14	LOC106390324R	ATAAACTCAACGCCGTTCCC	20	2
	21	LOC106372205F	GGACTCGAAACTAGCGCAGA	20	2
	22	LOC106372205R	AACAGATTGTCATCTCGGCCA	21	2
	25	LOC106387251F	ATACCCGTCAAGCCTTTGGG	20	2
	26	LOC106387251R	TCCGAGGAGAGGAAAGGCAT	20	2
	27	LOC106396280F	TTCGGCGACTGTTGCTAATC	20	2
	28	LOC106396280R	GTCCTTTGAGCCAGGAGCC	19	2
	29	LOC106400927F	ACGATGGATGCCGCTAGAAG	20	2
	30	LOC106400927R	ATCCCGGAGAGGTTAAGGCT	20	2
	31	LOC106434448F	GTACACATCCCGCATCACAT	20	2
	32	LOC106434448R	CGATTCTTCAGGGGCTAACCTAT	23	2
	33	LOC106439274F	CTCCACTAAGAACTGGGCCG	20	2
	34	LOC106439274R	TGGGTCGAATCTCTGCCTCT	20	2
	35	LOC106439448F	CAACAAAGACAGTTGAAGGTCAC	23	2
	36	LOC106439448R	TCGCATCTCCTTATACAGCCAC	22	2
	37	LOC106446788F	GCACATTGTCCGGACTCACA	20	2
	38	LOC106446788R	GGAGGAAGACTTGGCTCCATTA	22	2
	41	LOC106436817F	GAGGCCACAGCCGATACTTT	20	2
	42	LOC106436817R	CCATTGCTCACTTCCTCCTG	20	2
