# Supplementary material for: Effects of Low Nighttime Temperature on Fatty Acid Content in Developing Seeds from Brassica napus L. Based on RNA-Seq and Metabolome
Source: Plants (Basel). 2023 Jan 10;12(2):325. doi: 10.3390/plants12020325 (PMC9862530; doi:10.3390/plants12020325)
Supplement: Supplementary file 1 [file plants-12-00325-s001.zip › Table S17.xlsx]

## Sheet: Table S17
	Table S17 The primer design of LOC106419344 and LOC106430193 promoter
ID	Primer	Primer sequence (5'->3')	Length	Product length
1	LOC106419344F	GGTCGGAACTGTTAAAGCCAAT	21	1022
2	LOC106419344R	CGTGCTGCATCGGTTTCTTG	20
3	LOC106419344F	GCAGACGGTTACAATACAGGT	21	1001
4	LOC106419344R	ACTTTAAGAACTGGAGTCACTGCT	24
5	LOC106430193F	AAGTTGTCGTGATTTCTTGCCC	22	1947
6	LOC106430193R	AAGTCCTCTCGGTCGGATCA	20
