# Supplementary figures and images for: Effects of Low Nighttime Temperature on Fatty Acid Content in Developing Seeds from Brassica napus L. Based on RNA-Seq and Metabolome
Source: MDPI journal article supplement (doi:10.3390/plants12020325), 2023-01-10

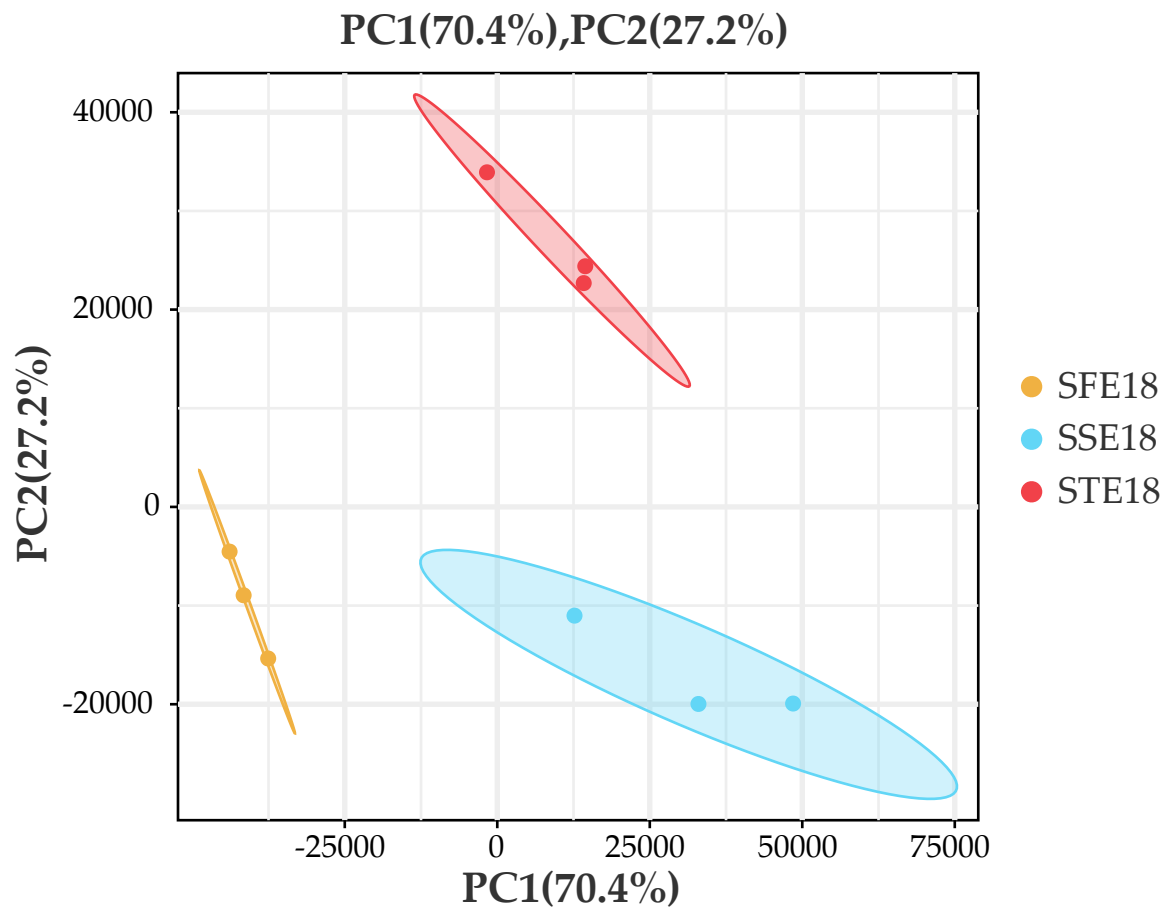

Figure S7. Principal component analysis (PCA) score chart of the RNA-seq data of WTSL in HNT.

Supplement: s1 [file s1]

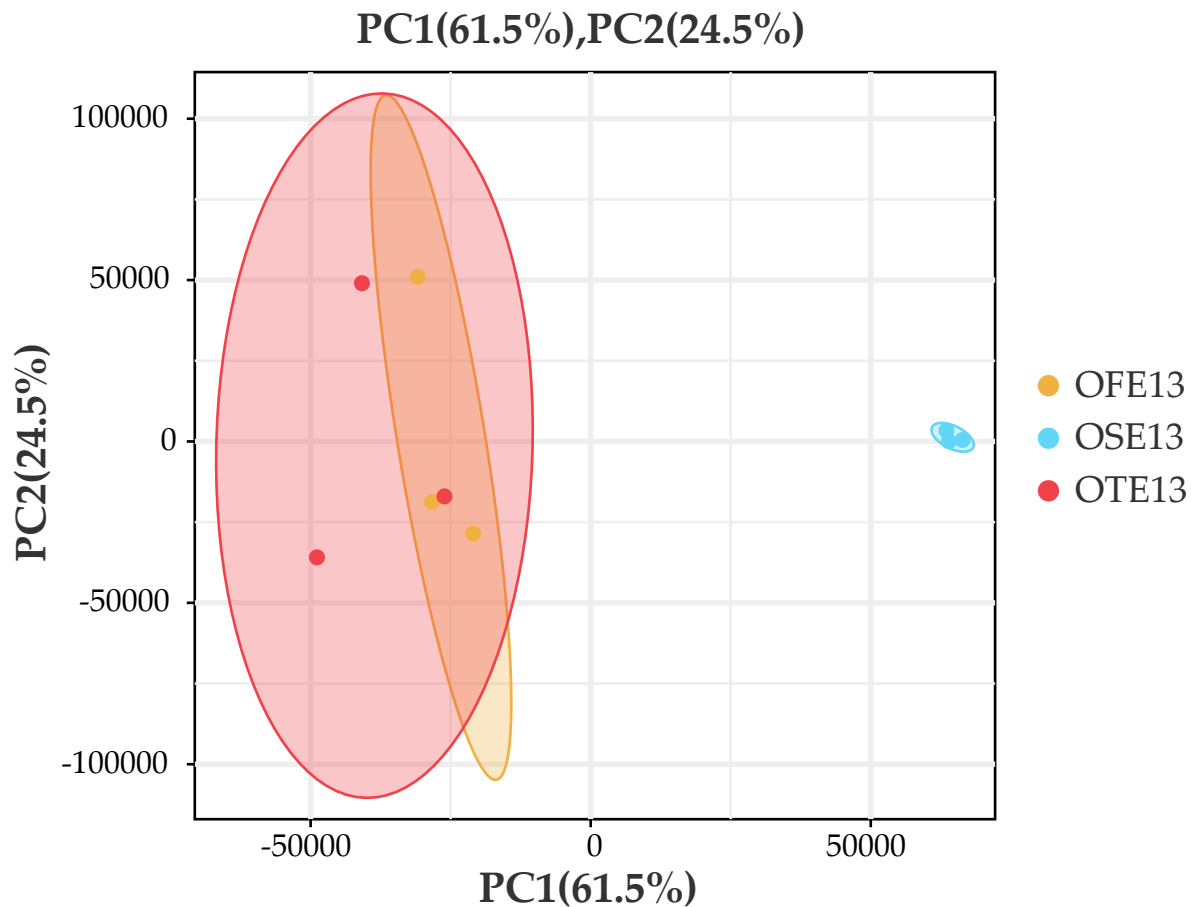

Figure S4. Principal component analysis (PCA) score chart of the RNA-seq data of STSL in LNT.

Supplement: s1 [file s1]

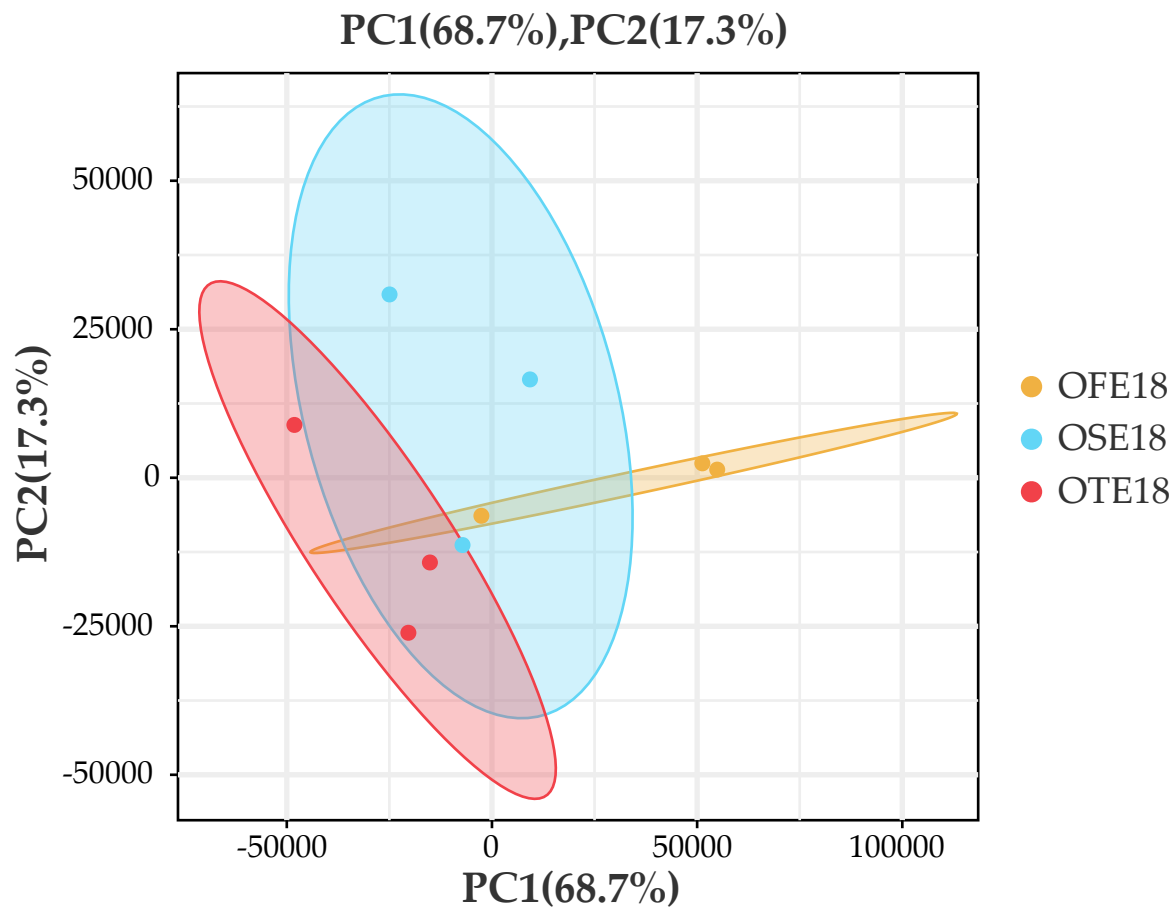

Figure S5. Principal component analysis (PCA) score chart of the RNA-seq data of STSL in HNT.

Supplement: s1 [file s1]

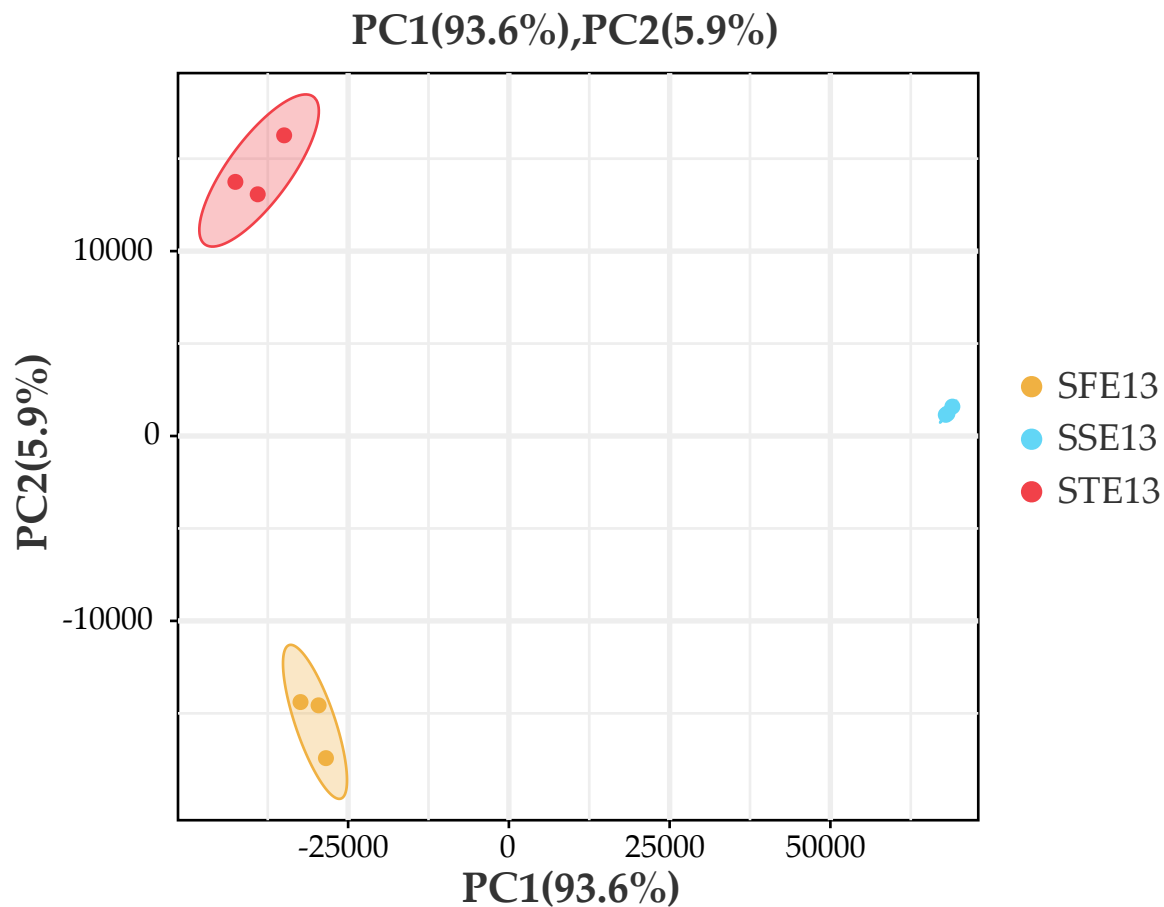

Figure S6. Principal component analysis (PCA) score chart of the RNA-seq data of WTS� in LNT.

Supplement: s1 [file s1]
